# Supplementary material for: The long non-coding RNA MIR31HG regulates the senescence associated secretory phenotype
Source: Nat Commun. 2021 Apr 28;12:2459. doi: 10.1038/s41467-021-22746-4 (PMC8080841; doi:10.1038/s41467-021-22746-4)
Supplement: Supplementary file 5 — Supplementary Data 1 [file 41467_2021_22746_MOESM5_ESM.xlsx]

## Sheet: Supplementary Table 1A
Gene	Con1	Con2	Con3	Sen1	Sen2	Sen3	Sen siMir31hg 1	Sen siMir31hg 2	Sen siMir31hg 3
A1BG	9.99844	8.88681	7.95884	4.7631	5.91818	7.07739	10.9071	9.05371	10.3912
A1BG.AS1	2.7393	1.31117	2.42225	1.46557	1.71818	1.85782	1.89688	2.37474	1.76872
A2M	5.61556	6.11878	4.84451	1.28237	0.381818	0.619272	0.94844	0.890529	0.44218
A4GALT	4.51984	3.9335	3.8064	2.93114	4.39091	2.65402	7.1133	7.42108	5.30616
A4GNT	0.54786	0.291371	0.692073	0	0.190909	0.707739	0	0.148422	0.22109
AAAS	20.6817	21.9985	19.7241	14.2893	15.4636	14.6856	17.0719	12.319	15.9185
AACS	34.5152	41.3746	29.0671	26.9298	27.4909	25.9209	19.443	23.3022	24.9832
AADAT	6.84825	10.3437	6.92073	11.9078	11.4546	11.9431	10.4328	13.2095	13.7076
AAGAB	66.1541	69.0549	66.785	52.2109	47.1546	48.834	52.6384	51.6507	46.8711
AAK1	208.461	192.596	192.742	150.221	144.136	146.502	154.121	151.39	149.457
AAMDC	11.3681	9.76092	12.4573	5.31269	5.72728	4.68877	3.31954	3.11685	4.4218
AAMP	50.5401	50.4071	50.1753	73.2785	67.2	64.2273	66.865	63.5244	69.8645
AAR2	37.6654	33.5076	33.9116	21.9836	25.3909	26.3633	18.4946	24.4895	24.0988
AARD	0.136965	0.145685	0.692073	0.366393	0	0.0884674	0	0.148422	0
AARS	72.7284	78.5244	62.2865	59.9052	53.8364	57.6807	35.5665	39.4801	34.9322
AARS2	10.8202	11.5091	16.2637	5.86228	7.25455	8.75827	10.4328	6.67897	8.18034
AARSD1	0.684825	0.145685	0	0.366393	0	0.176935	0	0.148422	0
AASDH	21.6405	21.9985	20.7622	10.259	12.2182	11.4123	7.1133	10.0927	11.9389
AASDHPPT	129.158	129.514	136.684	108.819	111.109	111.734	84.8853	97.9582	91.9735
AASS	40.8155	42.8315	40.8323	42.1351	38.5637	41.7566	36.0407	36.5117	38.4697
AATK	0.684825	0.291371	0.346036	0	0	0.176935	0.47422	0	0.22109
ABALON	0.136965	0	0	0.549589	0.572728	0.176935	0	0.445265	1.32654
ABAT	10.8202	11.9462	6.92073	2.38155	3.81818	3.27329	3.31954	2.37474	3.97962
ABCA1	31.091	29.2828	34.2576	150.771	163.991	151.987	286.903	296.843	276.363
ABCA10	0.958755	1.16548	0.346036	0	0	0.176935	0.47422	0.742108	0
ABCA11P	7.25914	6.26447	6.22865	5.1295	4.77273	4.6003	4.7422	5.78844	4.20071
ABCA12	1.09572	0.291371	0	0	0	0	0	0.296843	0
ABCA13	0	0	0	3.29753	2.48182	4.68877	1.42266	0.742108	1.10545
ABCA2	30.5432	32.6335	30.1052	33.1585	39.1364	32.7329	55.4837	37.8475	50.1875
ABCA3	0.958755	0.437056	1.38415	0.549589	0.190909	0.265402	0	0.445265	0.22109
ABCA4	0.410895	0.291371	0	3.84712	3.62727	4.86571	4.26798	3.85896	5.30616
ABCA5	20.9556	20.1046	19.378	2.74794	5.34546	4.95417	4.26798	4.74949	3.53744
ABCA6	2.19144	1.60254	4.15244	4.21351	7.25455	5.13111	10.9071	8.46003	9.94906
ABCA7	2.3284	2.76802	3.46036	1.28237	1.33636	1.15008	0.94844	3.11685	1.32654
ABCA8	9.72451	8.88681	8.65091	1.83196	1.71818	3.36176	1.42266	1.33579	2.2109
ABCA9	0.684825	0.582741	1.03811	0.549589	0.763637	0.35387	0.94844	1.33579	0.884361
ABCB1	4.93074	4.66193	5.88262	0.915981	0.763637	0.707739	0.94844	0.296843	0
ABCB10	41.9113	44.7254	56.75	19.7852	20.2364	23.1785	15.6493	20.3337	19.677
ABCB6	13.8335	12.3833	11.7652	5.1295	6.3	8.139	4.7422	5.34317	5.30616
ABCB7	24.9276	22.8726	24.9146	14.4725	17.9455	18.1358	16.1235	16.0295	15.0341
ABCB8	17.5315	18.2107	25.2607	15.5717	13.9364	16.8088	15.6493	16.1779	17.0239
ABCB9	4.79377	6.9929	2.07622	4.7631	2.86364	3.18483	7.1133	3.26527	5.96943
ABCC1	4.65681	5.24467	3.8064	4.03032	5.91818	4.42337	2.84532	5.04633	5.74834
ABCC10	25.3385	27.0975	22.4924	28.7618	24.0546	22.3822	28.9274	23.3022	22.109
ABCC2	1.50661	1.0198	0.346036	1.28237	0.763637	1.06161	1.42266	1.48422	1.32654
ABCC3	46.0202	46.6193	36.3338	13.9229	17.1818	14.4202	12.3297	14.1	15.4763
ABCC4	69.9891	65.9955	62.6326	57.89	56.3182	56.1768	55.9579	50.6117	46.2078
ABCC5	42.3222	39.335	45.3308	52.3941	56.7	56.6191	65.4423	70.6486	68.759
ABCC9	0.27393	0.728427	0.346036	0	0	0.176935	0	0	0
ABCD1	6.98521	8.01269	10.0351	12.091	10.5	10.1737	13.7524	12.7642	14.5919
ABCD3	91.7665	89.3051	87.5472	56.0581	54.6	58.5654	69.7103	86.0845	77.3815
ABCD4	17.2576	15.297	13.8415	12.091	16.2273	15.4818	13.2782	15.2874	18.5716
ABCE1	184.492	174.968	188.59	166.892	169.527	175.785	115.235	113.839	100.154
ABCF2	79.3027	74.4452	69.5533	60.8212	61.2818	59.8924	55.9579	53.1349	50.8507
ABCF3	26.7082	28.9914	26.6448	39.0208	32.4546	32.7329	36.9891	30.7233	38.2486
ABCG2	2.7393	2.91371	0.692073	1.28237	0.763637	0.973141	1.42266	1.92948	1.76872
ABHD10	68.4825	70.8031	79.2423	84.2703	75.2182	83.8671	94.844	87.5687	86.4462
ABHD11	4.79377	5.39036	3.8064	3.11434	5.53637	6.10425	7.58752	6.38212	9.94906
ABHD11.AS1	0.27393	0.291371	0.346036	0.183196	0.381818	0.619272	0.47422	0.296843	0.22109
ABHD12	45.7463	51.2812	41.8704	21.9836	25.2	20.8783	26.5563	28.2001	30.0683
ABHD12B	0	0.145685	0	0.549589	0.190909	0	0	0.148422	0
ABHD13	61.3603	56.5259	53.9817	69.4314	61.0909	66.439	67.3392	66.9381	62.5685
ABHD14A	2.87626	2.62234	1.38415	1.64877	1.14546	1.68088	1.89688	0.890529	1.32654
ABHD14B	13.0117	15.4426	19.032	12.091	12.2182	10.6161	8.06174	10.5379	7.95925
ABHD15	11.642	9.76092	10.0351	10.6254	9.92728	10.6161	12.8039	14.6937	18.3505
ABHD16B	2.3284	3.49645	2.42225	5.67908	6.49091	3.98103	5.69064	5.04633	7.51706
ABHD17A	8.08093	9.46955	13.4954	10.259	8.4	7.8736	10.9071	9.6474	11.4967
ABHD17B	29.1735	35.2559	33.5655	76.3928	74.4546	73.4279	54.0611	63.5244	59.2522
ABHD17C	60.1276	59.5853	64.7088	159.93	166.664	151.191	82.5142	83.2645	79.8135
ABHD18	16.4358	16.1711	15.9177	13.1901	10.3091	11.4123	12.8039	13.0611	11.4967
ABHD2	127.514	128.203	133.224	207.745	200.264	208.341	197.75	195.916	192.791
ABHD3	8.90272	10.7807	11.0732	7.69424	4.96364	7.16586	12.8039	9.05371	10.8334
ABHD4	17.6685	19.9589	13.1494	23.9987	22.1455	23.09	32.2469	30.1296	31.3948
ABHD5	53.1424	54.632	64.0167	119.444	109.391	121.112	77.2978	92.7634	91.3102
ABHD6	7.53307	8.15838	4.15244	7.32785	10.1182	9.37754	14.7008	12.7642	15.2552
ABHD8	6.71128	6.9929	5.19054	5.49589	5.72728	5.39651	8.53596	5.04633	3.97962
ABI1	131.486	129.514	134.262	165.243	183.846	166.849	159.812	167.419	152.552
ABI2	145.183	161.565	152.948	124.024	128.1	133.143	117.606	125.861	125.579
ABI3	0.54786	1.31117	1.03811	0.366393	0.190909	0.619272	0	0	0.44218
ABI3BP	4.79377	5.24467	3.46036	3.29753	2.29091	3.71563	1.42266	2.82001	3.09526
ABL1	93.4101	96.0066	99.3124	150.587	164.182	151.633	149.379	131.205	131.328
ABL2	215.72	215.323	216.965	448.281	449.782	439.241	384.592	383.966	370.768
ABLIM1	40.1307	41.229	36.6799	9.8926	8.59091	12.297	11.3813	10.6863	7.95925
ABLIM3	56.9774	59.2939	56.0579	79.5072	85.3364	88.2905	66.865	56.5486	69.6434
ABRACL	40.8155	47.3477	41.1783	63.5691	56.8909	66.6159	82.5142	86.975	79.1503
ABRAXAS1	11.779	13.8401	13.1494	8.79342	11.6455	9.37754	12.3297	11.7253	13.4865
ABRAXAS2	46.0202	45.0168	38.7561	39.9368	42.7637	41.0489	36.0407	42.4486	34.9322
ABT1	18.3533	17.1909	15.9177	19.7852	17.9455	21.586	14.2266	22.5601	16.3607
ABTB1	6.84825	9.32386	4.84451	12.6405	13.1727	12.3854	16.5977	9.79582	15.2552
ABTB2	9.17665	12.0919	12.4573	10.8086	12.2182	12.3854	20.8657	21.3727	17.4661
ACAA1	20.6817	24.1838	19.032	13.9229	18.5182	16.3665	14.7008	19.2948	15.6974
ACAA2	14.7922	14.8599	20.0701	8.06064	5.53637	7.34279	11.8555	8.60845	10.8334
ACACA	0.54786	0.728427	1.38415	0	0.572728	0.265402	0	0.742108	0.66327
ACACB	1.50661	2.33097	2.76829	0.549589	0.954546	0.619272	1.89688	2.0779	1.10545
ACAD10	11.779	11.8005	8.30487	7.51105	7.82728	8.139	7.58752	7.71792	7.73815
ACAD8	13.4226	13.2574	10.7271	16.6709	15.2727	13.7124	14.2266	15.4358	18.1294
ACAD9	24.7907	26.369	25.9527	20.518	17.9455	21.4091	25.6079	22.2632	22.3301
ACADM	69.4412	69.929	77.1661	64.1187	62.4273	64.2273	56.4322	63.2276	65.2216
ACADS	1.78054	3.78782	2.76829	0.366393	1.33636	1.85782	1.42266	0.148422	1.32654
ACADSB	47.3899	41.0833	44.2926	27.6626	32.2637	33.2637	34.1438	33.098	32.7213
ACADVL	143.128	145.103	128.379	110.284	117.218	121.643	128.039	123.932	135.97
ACAP1	1.09572	0.582741	2.76829	0.915981	0.572728	0.442337	2.3711	0.593686	1.10545
ACAP2	262.425	260.631	276.483	273.329	271.855	292.031	257.027	297.288	285.648
ACAP3	29.9953	31.031	28.375	20.3348	18.7091	19.8167	33.1954	23.3022	30.0683
ACAT1	83.6856	90.1792	91.6996	69.2482	68.1546	72.0125	59.2775	69.6097	64.1161
ACAT2	27.9408	27.8259	29.0671	13.3733	18.9	17.7819	14.7008	17.0685	14.813
ACBD3	166.001	168.412	160.215	167.258	173.155	175.342	158.864	180.926	164.491
ACBD3.AS1	0.136965	0.291371	0.692073	0.366393	0.763637	0.442337	0.47422	0.445265	0.44218
ACBD4	3.42412	4.51625	2.42225	1.64877	1.33636	1.23854	1.42266	0.742108	1.54763
ACBD5	62.1821	59.1483	64.3628	53.1269	49.2546	54.0536	54.0611	54.6191	53.0616
ACBD6	24.2428	26.5147	23.1844	21.8004	24.8182	19.7282	20.3914	20.9274	20.5614
ACBD7	1.78054	2.47665	2.07622	0.183196	0.190909	0.35387	0.47422	0	0.22109
ACCS	2.3284	2.18528	2.76829	1.28237	1.71818	1.68088	1.42266	0.742108	1.10545
ACD	6.84825	5.68173	7.6128	5.31269	5.53637	4.51184	7.1133	5.64002	5.30616
ACE	3.01323	3.78782	2.42225	2.19836	2.29091	1.59241	2.3711	1.03895	1.76872
ACER2	2.7393	4.51625	3.46036	3.11434	2.86364	2.56555	3.31954	4.45265	5.08507
ACER3	41.5004	42.9772	51.5594	41.9519	35.5091	42.8182	47.422	43.9328	44.4391
ACIN1	139.978	141.606	140.145	152.969	157.691	151.368	173.564	157.03	171.787
ACKR3	0	0	0	0.732785	1.14546	0.619272	0	0	0
ACKR4	78.7548	89.4508	92.0457	9.8926	9.73637	10.793	3.31954	4.60107	4.4218
ACLY	266.123	267.915	267.14	247.498	256.964	248.682	299.233	285.86	277.91
ACO1	213.254	204.979	186.86	250.246	260.591	253.017	291.171	277.548	284.101
ACO2	32.3237	33.3619	30.4512	26.9298	26.7273	27.9557	13.2782	16.3264	14.813
ACOD1	0	0	0	0.366393	0.190909	0.530804	0	0	0.22109
ACOT1	0.684825	1.0198	1.03811	0.915981	0.381818	1.06161	1.42266	0.148422	0.66327
ACOT11	1.36965	1.16548	0.692073	1.09918	1.90909	1.59241	2.3711	2.22632	1.10545
ACOT12	0	0	0.346036	0	0.190909	0.35387	0	0.148422	0
ACOT13	17.5315	18.502	17.9939	13.1901	15.8455	14.951	16.1235	18.5527	18.7927
ACOT2	11.9159	10.635	12.4573	7.51105	8.59091	7.16586	7.58752	6.97581	10.1701
ACOT7	39.8568	36.4213	42.2164	45.2495	44.8637	47.9493	58.329	53.5802	59.6943
ACOT8	6.43735	8.15838	8.65091	6.59507	6.10909	5.66191	5.21642	7.71792	7.29597
ACOT9	67.3867	65.7041	52.9436	58.0732	64.1455	64.1389	76.3494	61.7433	73.623
ACOX1	74.9198	82.1665	78.2042	95.8116	102.518	102.268	128.988	127.939	117.62
ACOX2	4.65681	1.89391	5.88262	2.74794	4.00909	3.36176	5.21642	3.26527	5.30616
ACOX3	20.4078	20.9787	19.032	14.2893	13.1727	12.8278	13.7524	10.8348	11.2756
ACP1	93.4101	104.456	100.004	83.9039	89.7273	88.2905	85.3596	85.4908	87.9939
ACP2	20.6817	19.8132	22.4924	12.6405	8.01819	9.02367	7.1133	9.35055	17.245
ACP5	0.82179	0.728427	1.03811	1.09918	0.954546	0.619272	1.89688	1.33579	1.32654
ACP6	4.51984	3.9335	3.8064	2.93114	1.71818	3.5387	1.42266	2.82001	4.64289
ACP7	0.27393	0.145685	0.692073	36.2729	27.6818	28.575	17.5461	19.7401	22.5512
ACPP	11.5051	12.8203	13.8415	488.951	496.364	503.999	405.458	396.434	405.7
ACRV1	0	0.145685	0	0	0	0.176935	0.47422	0.296843	0.44218
ACSBG1	0.82179	0.728427	0.346036	0.366393	0.572728	0.265402	0	0.296843	0.66327
ACSF2	4.10895	4.07919	3.11433	1.28237	1.33636	1.50395	0.94844	1.18737	0.884361
ACSF3	6.71128	8.01269	8.30487	6.22867	6.87273	5.83885	6.63908	8.01476	7.51706
ACSL1	43.144	38.1696	35.9878	43.7839	41.6182	45.1184	44.5767	53.1349	42.4493
ACSL3	192.299	188.371	203.469	290.366	279.109	293.889	242.326	267.456	264.645
ACSL4	492.389	496.204	542.239	683.505	706.364	715.701	529.703	538.325	522.657
ACSL5	1.09572	1.74822	1.03811	1.28237	1.33636	1.06161	0.94844	1.03895	1.76872
ACSM4	0.27393	0	0	0.549589	1.14546	0.530804	0.47422	0.890529	0.66327
ACSS1	3.15019	2.18528	2.42225	1.09918	0.763637	0.442337	1.42266	0.445265	1.54763
ACSS2	23.6949	28.263	28.375	24.7315	19.0909	29.0173	27.0305	31.3169	29.405
ACSS3	0.410895	0.874112	0.346036	0.366393	0.190909	0.0884674	0	0	0.44218
ACTA1	0.136965	0.874112	1.03811	0.183196	0.190909	0.442337	0	0.148422	0.22109
ACTA2	98.7517	103.728	87.5472	6.96146	8.78182	7.07739	8.53596	9.94424	9.94906
ACTA2.AS1	0.410895	0.874112	0.346036	0	0.190909	0.0884674	0.47422	0	0.22109
ACTB	4787.34	4831.22	4664.22	2499.9	2460.63	2318.2	1936.24	1720.5	1767.62
ACTC1	1.09572	1.0198	1.73018	0.549589	0	0.0884674	0.47422	0	0.22109
ACTG1	4863.76	5024.83	4913.37	2754.72	2812.09	2752.93	2268.19	2244.13	2245.61
ACTG1P17	0	0.145685	0	0.183196	0.190909	0.0884674	0.47422	0	0.22109
ACTG1P20	28.8996	29.7198	33.5655	15.2053	17.3727	17.1627	20.8657	14.8422	16.5818
ACTG1P4	1.78054	2.76802	1.38415	1.83196	1.52727	1.23854	1.89688	0.593686	0.884361
ACTG2	8.49183	10.198	8.99694	1.28237	0.572728	1.23854	0.94844	0.296843	0.22109
ACTL10	1.23268	0.582741	0	0.366393	0.763637	0.442337	1.42266	0	0.22109
ACTL6A	60.2646	55.7975	55.3658	64.3019	67.2	62.281	51.2157	54.6191	44.6602
ACTN1	1061.34	1044.42	976.515	691.749	663.982	694.734	739.309	651.867	671.893
ACTN4	431.44	433.268	400.364	268.566	259.636	259.563	271.254	219.367	249.39
ACTR10	93.9579	95.5696	111.424	76.0264	67.9637	80.7707	77.2978	84.6003	73.623
ACTR1A	112.311	118.588	113.846	111.383	104.427	109.08	122.349	118.886	123.81
ACTR1B	59.9906	54.0493	64.7088	39.204	40.0909	37.2448	24.1852	26.419	31.3948
ACTR2	978.888	988.038	1010.77	747.807	768.982	804.08	757.329	779.361	735.346
ACTR3	836.308	834.777	875.818	680.574	695.291	723.575	635.454	646.821	629.886
ACTR3.AS1	0.54786	0.437056	0	0.183196	0	0.35387	0	0.296843	0.44218
ACTR3B	5.4786	4.51625	4.15244	3.66393	3.05455	2.91942	0.47422	1.03895	0.884361
ACTR3C	0.410895	0.291371	0.692073	0	0.190909	0.530804	0.47422	0.296843	0
ACTR5	5.0677	3.9335	2.42225	3.48073	3.62727	3.98103	3.31954	2.96843	3.09526
ACTR6	46.4311	46.6193	52.9436	46.715	40.8546	44.3222	41.7313	38.8864	43.5548
ACTR8	46.1572	46.1823	42.9085	41.2192	43.3364	44.4106	40.3087	42.7454	42.4493
ACTRT3	3.83502	2.03959	3.11433	1.28237	2.67273	3.36176	2.3711	2.37474	1.98981
ACVR1	75.4677	81.4381	81.3185	89.583	104.809	95.2794	119.029	119.182	112.093
ACVR1B	51.6358	47.2021	44.9847	73.0953	72.9273	71.4817	61.1743	59.0718	57.9256
ACVR1C	2.19144	2.91371	3.11433	1.83196	2.48182	2.38862	2.84532	2.37474	1.54763
ACVR2A	9.72451	10.198	15.2256	17.4036	12.4091	15.2164	10.9071	13.0611	14.1498
ACVR2B	6.71128	6.41016	5.53658	11.7246	9.92728	10.8815	10.9071	13.8032	13.2654
ACVR2B.AS1	0	0.145685	0.346036	0.183196	0	0.0884674	0	0.148422	0.22109
ACVRL1	19.723	18.502	21.8003	125.673	125.046	122.173	79.6689	70.5002	80.0346
ACY1	0	0.145685	0.692073	0.549589	0.572728	0	0	0.445265	0.44218
ACYP1	10.9572	9.17818	8.30487	6.96146	9.54546	9.55448	14.2266	11.1316	11.9389
ACYP2	16.9837	13.9858	19.032	9.52621	12.4091	11.6777	13.2782	12.0221	10.3912
ADA	3.28716	4.66193	3.46036	2.93114	2.29091	2.38862	3.79376	2.22632	1.98981
ADA2	4.10895	3.9335	2.07622	0.732785	0.763637	0.619272	0.47422	0.296843	0.22109
ADAL	10.8202	10.198	11.0732	5.1295	5.72728	6.98892	4.7422	6.38212	5.52725
ADAM10	447.738	455.412	458.498	308.136	313.473	309.813	312.985	319.848	283.659
ADAM12	45.3354	37.7325	32.5274	16.3045	13.1727	11.7662	11.3813	11.8737	11.9389
ADAM15	35.2	37.7325	39.7942	20.3348	23.6727	22.3822	23.711	24.3411	22.7723
ADAM17	73.4132	63.0818	58.8262	72.5457	62.4273	71.3047	78.7205	80.8897	74.7285
ADAM19	132.582	128.349	111.77	371.156	363.682	358.116	663.433	662.405	673.662
ADAM1A	2.46537	3.64213	3.46036	2.93114	1.14546	2.21168	1.42266	0.742108	1.76872
ADAM21	1.36965	1.0198	0	0.183196	0.190909	0.176935	0.47422	0.148422	0.44218
ADAM22	0.136965	0.145685	1.03811	0.183196	0.190909	0.0884674	0.47422	0.890529	0
ADAM23	0.82179	1.0198	0.692073	1.28237	1.52727	1.23854	2.84532	3.41369	1.98981
ADAM28	0	0.728427	0	0.915981	0.954546	0.35387	0.47422	0.742108	1.10545
ADAM33	56.2926	58.1285	54.3277	63.3859	59.5637	52.7266	67.3392	58.6265	65.6638
ADAM8	2.3284	1.89391	1.38415	2.93114	2.48182	2.47709	5.21642	4.1558	6.41161
ADAM9	500.744	517.911	509.712	345.142	340.391	346.438	380.798	366.304	367.452
ADAMTS1	690.577	651.942	625.288	104.788	109.582	106.426	230.945	235.842	235.24
ADAMTS10	0.684825	1.0198	0.346036	0.915981	0.381818	0.530804	0.47422	0.742108	0.884361
ADAMTS12	68.7564	79.2528	75.4359	26.7467	32.8364	31.3175	26.5563	22.5601	26.3097
ADAMTS13	0.958755	1.89391	1.73018	0.549589	0.954546	0.530804	0.47422	0.890529	1.10545
ADAMTS14	4.79377	5.9731	5.53658	4.21351	4.39091	3.62716	0.47422	1.33579	0.884361
ADAMTS15	6.16342	6.11878	6.92073	0.732785	0.381818	0.619272	0.47422	1.18737	0.22109
ADAMTS2	124.501	127.038	99.6585	23.2659	17.9455	22.1168	23.2368	24.9348	27.8574
ADAMTS3	2.60233	2.62234	2.42225	2.74794	0.763637	2.74249	1.42266	3.41369	2.87417
ADAMTS4	8.76576	11.0721	9.68902	281.756	282.546	242.489	192.533	194.135	192.127
ADAMTS5	11.642	9.32386	13.8415	7.87744	6.49091	8.49287	26.0821	25.8253	21.0036
ADAMTS6	68.3455	69.929	78.2042	100.208	105.382	100.322	75.8752	80.1476	75.8339
ADAMTS7	2.46537	1.74822	2.42225	1.09918	0.190909	0.442337	0.94844	0.593686	0.66327
ADAMTS8	0	0	0	0.183196	0.381818	0.0884674	0	0.445265	0.66327
ADAMTS9	0.136965	0	0.346036	0.549589	0.954546	2.03475	1.89688	4.30422	5.30616
ADAMTSL1	109.024	114.654	103.811	33.8913	38.7546	36.9794	77.2978	78.3666	90.2048
ADAMTSL4	14.1074	15.734	16.9558	15.9381	15.2727	16.8088	23.2368	19.4432	23.8777
ADAMTSL4.AS1	0.54786	0.145685	0	0.915981	1.52727	1.50395	1.89688	1.48422	0.884361
ADAMTSL5	19.449	16.6081	16.6097	10.0758	9.35455	8.139	13.2782	10.8348	13.0443
ADAP1	0.27393	0.291371	0	0	0.190909	0.265402	0	0	0.22109
ADAP2	0.410895	0.291371	0	0.183196	0	0.265402	0	0.148422	0.884361
ADAR	287.078	291.225	323.544	276.26	290.755	285.396	300.655	279.775	271.057
ADARB1	18.2163	20.2503	20.7622	12.091	10.3091	10.97	8.06174	12.4674	11.4967
ADAT1	40.4047	42.1031	29.4131	37.5552	30.3546	33.6176	29.8758	28.7938	33.6057
ADAT2	13.0117	15.1513	17.9939	11.175	8.78182	9.55448	2.84532	6.08528	8.62252
ADAT3	1.23268	1.74822	2.07622	2.74794	2.48182	2.03475	2.84532	2.22632	3.09526
ADCK1	4.79377	4.9533	5.53658	2.56475	3.24546	2.03475	2.84532	2.82001	1.98981
ADCK2	7.25914	5.39036	6.92073	4.9463	4.58182	4.3349	4.26798	3.41369	3.75853
ADCK5	3.83502	4.66193	5.53658	3.66393	3.05455	3.27329	4.26798	1.92948	3.31635
ADCY1	0.136965	0.437056	0.346036	0.183196	0.381818	0.0884674	0	0.148422	0.22109
ADCY10	0.136965	0	0	0.183196	0.763637	0.265402	0	0	0
ADCY10P1	2.87626	2.18528	2.07622	4.39671	3.05455	3.00789	3.31954	3.11685	3.53744
ADCY3	35.063	36.567	35.6417	29.3114	31.8818	30.9636	29.4016	33.8401	33.1635
ADCY4	2.7393	2.33097	1.38415	3.84712	4.77273	4.51184	1.89688	2.52317	3.09526
ADCY5	0.27393	0.145685	0.346036	0	0.381818	0	0.94844	0.296843	0.22109
ADCY6	74.6459	72.697	83.3948	49.2798	48.6818	43.6144	60.7001	51.3538	56.8202
ADCY7	43.4179	38.4609	43.6006	44.6999	48.8727	48.6571	73.0298	69.6097	71.8543
ADCY8	0	0	0	0.549589	1.33636	0.973141	0	0.148422	0.66327
ADCY9	71.0848	66.7239	66.439	34.6241	31.8818	30.6097	32.7212	28.6454	27.1941
ADD1	264.068	270.392	256.413	219.469	209.046	209.314	201.543	207.642	208.93
ADD3	250.646	253.93	265.41	107.17	113.782	107.488	111.442	108.348	101.923
ADGRA2	69.1673	73.8625	77.8582	14.1061	13.9364	12.6508	15.175	10.0927	14.5919
ADGRA3	88.7533	85.663	88.5853	107.719	120.464	110.584	87.7307	100.185	94.8477
ADGRB1	0.82179	0.582741	0.346036	2.56475	2.67273	1.85782	1.42266	1.18737	1.54763
ADGRB2	8.76576	10.9264	10.0351	8.42703	9.35455	8.31593	11.8555	11.8737	11.9389
ADGRE1	0.136965	0.145685	0.346036	0	0.381818	0.35387	0	0.296843	0
ADGRE2	2.7393	1.74822	2.76829	17.77	15.4636	16.4549	24.1852	26.1222	28.9628
ADGRE5	80.2614	82.6036	84.0868	99.2924	94.1182	87.9366	103.38	100.927	104.797
ADGRF4	0	0	0	0.183196	0.381818	0.176935	0.47422	0.593686	0.44218
ADGRF5	0	0	0	0.366393	0	0.176935	0.47422	0	0.66327
ADGRG1	3.01323	1.60254	1.38415	21.0676	15.6546	13.8894	56.4322	58.9233	54.6093
ADGRG2	0.54786	0.728427	0.346036	0.549589	0.190909	0.619272	0	0.445265	0.44218
ADGRG6	20.6817	22.4355	20.7622	2.38155	1.71818	1.85782	1.42266	0.296843	1.32654
ADGRL1	4.65681	3.05939	3.46036	2.74794	2.86364	1.68088	4.26798	4.74949	4.4218
ADGRL2	31.7759	28.8457	34.2576	20.3348	23.4818	22.4707	50.2673	53.5802	57.0413
ADGRL4	69.5782	65.5584	69.8993	142.71	143.182	149.421	304.449	349.236	300.462
ADH1A	0.410895	0.145685	0.346036	0	0	0.0884674	0	0.148422	0
ADH5	190.518	190.993	198.279	138.13	145.473	148.625	143.689	141.446	135.528
ADH6	0.958755	0.145685	0.346036	0.366393	0	0.0884674	0	0.445265	0
ADHFE1	2.7393	3.20508	2.76829	1.46557	0.572728	0.796207	1.42266	1.92948	1.98981
ADI1	30.8171	29.4284	29.0671	29.1282	26.7273	32.9099	39.3602	36.2148	38.9119
ADIPOR1	100.532	106.496	109.694	134.649	128.482	118.015	137.524	137.438	122.705
ADIPOR2	94.6428	81.2924	83.0487	118.711	122.182	116.246	113.339	121.112	113.419
ADIRF	9.45058	11.6548	11.7652	19.602	23.8636	19.9936	39.3602	37.2538	42.8915
ADK	110.257	108.827	106.925	147.29	156.927	161.807	149.379	149.312	149.678
ADM	139.43	162.731	166.79	60.0884	62.2364	60.954	35.0923	31.6138	30.0683
ADM2	1.09572	0.874112	1.73018	0	0.572728	0.796207	0.47422	0.296843	0.66327
ADM5	0.684825	0.582741	0	0.366393	0.190909	0.176935	0.47422	0.445265	0.22109
ADNP	139.978	135.924	145.335	140.145	128.482	143.406	128.988	139.071	131.328
ADNP.AS1	1.64358	2.18528	0.692073	1.64877	1.71818	1.59241	0.94844	1.48422	2.43199
ADNP2	32.1868	30.0112	33.2195	31.1434	32.6455	30.2558	25.6079	25.3801	26.5308
ADO	51.6358	45.8909	39.7942	72.5457	63.5728	65.2889	62.1228	58.0328	55.9358
ADORA1	0.410895	0.582741	0	0.549589	0	0.176935	0.47422	0.890529	0.22109
ADORA2A	0	0	0	0.183196	0.190909	0.265402	0	0	0.44218
ADORA2A.AS1	0.410895	0.582741	0	1.09918	1.14546	1.41548	0	1.18737	1.10545
ADORA2B	4.79377	4.80762	3.8064	1.28237	0.763637	0.973141	0.47422	1.63264	2.43199
ADPGK	63.8257	74.5909	66.0929	56.7908	56.7	58.3	40.3087	50.6117	50.6296
ADPGK.AS1	0.684825	0.291371	0.346036	0	0.190909	0.0884674	0	0.148422	0.22109
ADPRH	0.958755	2.76802	2.42225	1.46557	0.954546	0.884674	0.47422	1.03895	0.44218
ADPRHL1	0.27393	0.728427	0.692073	0.549589	1.14546	0.707739	1.89688	0.742108	1.76872
ADPRHL2	17.8054	18.065	17.3018	15.2053	16.6091	18.4012	18.4946	15.7327	19.8981
ADPRM	4.65681	5.82741	5.53658	5.67908	7.63637	6.10425	6.16486	5.93686	5.30616
ADRA1D	13.9704	14.1315	13.8415	3.84712	3.43637	3.27329	1.42266	4.00738	4.4218
ADRA2A	0	0.145685	0	0.366393	0	0.0884674	0.47422	0.445265	0.44218
ADRB2	1.91751	2.47665	2.42225	0	0.190909	0.176935	0.47422	0.296843	0
ADRM1	54.2381	60.3137	68.8612	60.0884	58.8	55.1152	64.4939	62.9307	64.7794
ADSL	53.8272	58.8569	58.1341	39.0208	44.6727	44.4106	30.8243	35.1759	35.8166
ADSS	128.747	129.951	129.418	201.149	200.646	202.148	188.739	193.838	190.801
ADSSL1	1.50661	1.60254	0.692073	0.366393	0.381818	0.176935	0.94844	0.742108	0.44218
ADTRP	0.54786	0.291371	0	4.39671	3.81818	3.89257	4.26798	6.2337	7.29597
AEBP1	154.086	157.632	134.954	176.968	166.473	163.045	151.276	124.229	148.573
AEBP2	90.1229	95.4239	89.6234	71.0801	67.0091	71.4817	57.3806	56.5486	53.7249
AEN	54.3751	64.2472	60.9024	41.4024	38.9455	40.2527	43.154	37.2538	38.2486
AES	151.072	155.301	144.989	126.955	133.255	122.085	156.967	128.088	140.392
AFAP1	337.345	314.826	334.617	191.806	205.036	197.725	135.627	122.448	129.117
AFAP1.AS1	1.50661	1.60254	2.76829	1.28237	0.954546	1.23854	0.47422	0.593686	0.66327
AFAP1L1	2.87626	2.91371	2.07622	1.46557	2.48182	2.21168	1.89688	3.56212	2.43199
AFDN	54.9229	53.9036	54.3277	60.4548	65.1	64.4927	58.8032	55.2128	55.2725
AFF1	89.4381	81.1467	89.2774	140.328	124.855	119.077	135.153	136.548	152.552
AFF1.AS1	2.05447	2.76802	2.76829	1.28237	1.71818	1.76935	0	1.33579	2.2109
AFF3	20.1338	19.6675	19.378	6.04548	5.15455	5.83885	4.26798	6.2337	7.07488
AFF4	615.246	594.833	587.57	806.979	852.219	852.029	762.071	793.165	770.278
AFG1L	6.30039	7.57564	8.99694	3.11434	3.43637	3.5387	2.84532	4.1558	3.31635
AFG3L1P	8.08093	7.72132	7.26676	4.03032	6.68182	5.75038	5.21642	6.2337	6.19052
AFG3L2	39.7198	37.8782	46.0228	36.4561	32.8364	40.0757	34.618	35.0275	41.1228
AFMID	11.2311	11.9462	8.30487	10.0758	8.97273	9.11214	7.58752	10.3895	10.1701
AFP	0.27393	0.437056	0.346036	0	0	0	0	0.148422	0.22109
AFTPH	55.6078	52.4467	47.407	61.0044	62.0455	55.1152	64.4939	64.8602	63.4529
AGA	54.2381	61.0422	51.9054	69.981	64.9091	72.1009	71.6072	74.8044	76.055
AGAP1	15.3401	13.8401	15.5716	33.7081	34.9364	32.7329	38.886	39.3317	39.7962
AGAP1.IT1	0.136965	0	0	0.366393	0.381818	0.176935	0.47422	0.593686	0.44218
AGAP11	1.78054	1.74822	1.03811	0.549589	0.381818	0.796207	0.94844	1.78106	2.65308
AGAP2	0.684825	0	0.346036	0.183196	0.190909	0.35387	0	0.296843	0.22109
AGAP2.AS1	1.64358	2.47665	2.07622	2.74794	2.29091	3.09636	2.84532	2.96843	2.65308
AGAP3	30.8171	34.0904	37.0259	38.8376	36.8455	35.8293	45.5251	35.3243	35.8166
AGAP4	0.958755	0.437056	1.03811	0.549589	0.763637	0.619272	1.89688	0.890529	1.10545
AGAP5	2.19144	1.16548	2.07622	1.09918	0.381818	0.442337	0.94844	1.03895	1.10545
AGAP6	9.45058	7.28427	8.30487	5.67908	6.10909	6.98892	8.06174	5.78844	5.96943
AGAP9	2.05447	1.16548	1.38415	0.915981	0.763637	0.884674	0.47422	0.742108	0.22109
AGBL2	0.54786	1.0198	0.346036	0	0.763637	0.530804	0.94844	0.742108	0.22109
AGBL3	1.36965	0.874112	1.03811	0.183196	0.381818	0.619272	0	0.148422	0.44218
AGBL5	16.2988	14.8599	10.7271	8.06064	10.6909	9.28908	5.69064	8.3116	7.95925
AGFG1	166.412	161.565	169.212	181.181	189.764	193.655	146.06	142.93	141.719
AGFG2	7.39611	8.59544	6.22865	6.96146	4.39091	4.3349	5.21642	6.53055	3.31635
AGGF1	71.9066	81.0011	76.8201	59.722	60.1364	57.5038	66.865	61.0012	55.0514
AGK	3.83502	4.51625	4.15244	3.66393	2.67273	3.98103	1.89688	3.41369	2.43199
AGL	65.6062	67.1609	76.128	45.0663	45.6273	54.9382	48.8446	52.2444	43.7758
AGMAT	1.09572	1.45685	1.73018	0.915981	0.954546	0.707739	0.47422	0.742108	0.22109
AGO1	45.8833	40.5005	42.2164	40.4864	40.8546	38.7487	49.7931	35.0275	37.3642
AGO2	139.293	127.912	114.884	213.607	203.7	206.748	184.471	186.417	194.78
AGO3	19.1751	17.7736	15.5716	22.8995	16.2273	21.586	16.5977	19.1464	20.3403
AGO4	28.2148	30.8853	28.0289	19.7852	22.3364	19.6398	20.8657	25.0832	20.7825
AGPAT2	21.6405	24.4751	29.0671	27.113	21.7636	21.4976	27.5047	23.0053	22.109
AGPAT3	158.058	163.896	163.675	128.604	123.9	126.066	110.019	88.014	101.701
AGPAT4	7.12218	9.17818	7.26676	5.49589	5.34546	5.83885	5.69064	7.42108	3.53744
AGPAT4.IT1	0.54786	0.437056	0.692073	0	0.190909	0.35387	0.47422	0.296843	0.22109
AGPAT5	53.0054	50.4071	55.0198	50.9286	57.2728	55.7345	40.7829	40.3707	38.4697
AGPS	77.5222	71.8229	69.8993	41.036	42	43.6144	51.2157	55.0644	51.514
AGRN	72.4544	81.4381	102.427	43.9671	42	36.2716	56.4322	43.0422	50.4086
AGTPBP1	20.2708	19.6675	22.4924	12.6405	8.4	11.4123	9.95861	9.05371	7.95925
AGTRAP	14.6552	17.4822	15.2256	25.0979	25.2	24.3285	24.1852	28.4969	29.1839
AHCTF1	66.0171	65.4127	58.4801	70.8969	74.6455	71.4817	55.0095	62.4855	60.3576
AHCTF1P1	21.6405	23.7467	20.7622	27.113	27.8727	27.9557	22.2883	22.8569	20.1192
AHCY	63.6887	72.2599	57.7881	57.5236	54.9818	57.5923	50.7415	47.7917	49.7453
AHCYL1	214.076	200.754	194.818	256.292	246.273	260.094	297.336	306.49	310.632
AHCYL2	20.4078	22.7269	21.1082	25.0979	25.5818	26.8056	31.2985	28.0517	29.8472
AHDC1	37.2545	44.2883	38.41	28.029	26.7273	21.9399	30.8243	20.4822	28.2995
AHI1	58.0731	58.1285	51.2134	109.551	102.327	108.107	118.555	117.105	119.831
AHNAK	2524.13	2507.54	2368.96	2071.58	2074.23	2115.26	2189.47	2080.28	2082.01
AHNAK2	101.08	104.456	103.119	138.13	123.709	126.597	219.564	197.401	219.985
AHR	188.327	184.001	199.663	61.0044	59.5637	57.3269	50.2673	45.417	50.1875
AHRR	84.5074	85.9544	77.8582	30.2274	28.8273	30.5212	22.2883	18.998	20.3403
AHSA1	67.1128	65.5584	59.8643	80.7895	75.9819	79.9745	72.0814	75.8434	72.7387
AHSA2P	41.6373	41.9574	41.1783	23.2659	33.7909	31.4944	29.8758	28.2001	30.9526
AIDA	40.1307	40.6462	44.6387	63.0195	60.7091	59.0962	53.1126	60.2591	62.7896
AIFM1	24.1058	26.2234	21.4543	20.8844	23.1	21.2322	15.6493	25.2317	20.5614
AIFM2	17.2576	17.9193	15.9177	19.602	13.7455	16.1011	12.3297	9.94424	14.3709
AIG1	47.3899	46.1823	48.4451	47.4478	45.6273	47.4185	21.8141	24.9348	21.4457
AIM2	0	0	0	0.183196	0.572728	0.35387	1.42266	0.445265	1.76872
AIMP1	76.2895	84.4975	86.8551	56.974	55.3637	57.8577	55.4837	53.5802	46.65
AIMP2	8.62879	9.76092	8.30487	6.41187	7.25455	8.139	3.31954	6.67897	5.96943
AIP	17.1206	18.2107	18.3399	17.4036	13.1727	15.0395	16.5977	16.7716	20.1192
AJAP1	21.6405	20.5416	18.686	17.0373	10.8818	13.624	7.58752	7.5695	11.0545
AJM1	2.7393	1.60254	3.46036	0.549589	1.33636	0.707739	0.94844	1.18737	2.2109
AJUBA	99.5735	99.066	102.081	22.3499	21.3818	24.6824	25.6079	23.7474	16.3607
AK1	19.9969	16.7538	13.4954	16.4877	13.1727	12.7393	16.5977	14.6937	20.5614
AK2	72.0436	65.1214	67.131	45.9823	42.7637	47.1531	37.4634	36.3633	43.9969
AK3	207.639	213.138	216.965	184.112	202.746	210.818	195.379	208.532	208.267
AK4	2.87626	4.07919	3.11433	4.57991	3.05455	3.36176	2.84532	1.92948	1.76872
AK5	43.2809	44.2883	49.8292	58.6228	53.4546	55.0267	22.2883	22.7085	23.2145
AK9	3.97198	3.9335	4.49847	4.57991	5.53637	5.39651	5.21642	6.08528	2.43199
AKAP1	13.9704	17.7736	15.5716	12.4573	9.73637	9.73141	11.3813	12.4674	11.9389
AKAP10	51.7727	48.5132	48.099	55.1421	58.9909	58.0346	52.1642	53.5802	54.6093
AKAP11	312.28	320.945	328.735	356.683	385.637	371.828	289.274	295.952	289.849
AKAP12	245.03	255.678	262.296	473.929	481.473	507.891	410.674	407.565	412.112
AKAP13	105.737	98.0462	103.465	110.651	108.436	110.496	96.2666	92.615	92.4157
AKAP14	0	0.291371	0	0	0.190909	0	0	0.148422	0.44218
AKAP2	0.54786	0.291371	0.346036	0.732785	0.381818	0.530804	0	0.445265	1.10545
AKAP3	0.410895	0.437056	0	1.64877	2.1	2.30015	2.84532	2.22632	2.2109
AKAP5	8.2179	10.198	10.7271	0.732785	1.52727	0.619272	2.3711	1.03895	1.32654
AKAP6	18.2163	15.5883	15.9177	4.9463	3.62727	4.42337	7.1133	9.94424	8.84361
AKAP7	3.42412	3.64213	4.15244	1.64877	0.954546	1.50395	0.94844	1.03895	1.10545
AKAP8	26.7082	23.8924	28.721	29.4946	24.0546	30.5212	25.6079	29.0906	26.5308
AKAP8L	19.0381	19.3762	19.378	18.686	15.2727	17.9589	18.4946	13.8032	17.0239
AKAP9	200.791	193.033	196.203	194.921	194.346	199.848	186.843	192.8	196.991
AKIP1	24.3798	24.4751	21.4543	22.5331	20.4273	21.586	21.3399	23.599	29.8472
AKIRIN1	119.707	105.476	119.383	162.312	159.218	167.026	219.564	222.335	211.362
AKIRIN2	40.2677	41.229	38.064	42.6847	44.4818	44.0568	47.422	40.5191	44.218
AKNA	5.20467	5.24467	5.88262	4.9463	4.96364	4.86571	9.01018	5.34317	9.50688
AKNAD1	0.136965	0.291371	1.38415	0.366393	0.954546	0.265402	0.94844	0.445265	0.44218
AKR1A1	28.6257	30.1569	27.6829	26.5635	33.9818	29.1942	46.4735	38.8864	39.354
AKR1B1	245.989	219.839	203.123	600.884	557.264	503.822	571.909	545.894	570.855
AKR1C1	12.4638	10.635	10.3811	17.4036	16.4182	14.8625	13.2782	15.4358	17.245
AKR1C2	0.54786	1.60254	0.346036	1.09918	0	0.0884674	0.47422	0	0
AKR1C3	0.684825	1.31117	1.03811	0.915981	0.572728	0.884674	0.47422	0.148422	0.22109
AKR1E2	2.19144	0.728427	1.03811	0.549589	0.763637	0.707739	0.94844	0.890529	0.22109
AKR7A2	25.7494	27.2432	24.9146	41.9519	34.3637	36.4486	42.2056	38.5896	37.1431
AKR7A2P1	0.54786	0.437056	1.03811	1.09918	1.14546	0.973141	1.42266	0.593686	0.44218
AKR7A3	0.136965	0.145685	0	0.549589	0.572728	0.176935	0	0.148422	0.44218
AKR7L	0.136965	0.145685	0	0.549589	0.190909	0.176935	0	0	0.22109
AKT1	155.592	164.479	153.64	134.649	132.3	126.862	120.452	108.199	114.967
AKT1S1	42.7331	43.5599	38.7561	58.9892	62.2364	57.5038	51.69	51.2054	50.8507
AKT2	73.1393	77.796	82.7027	64.3019	70.0637	65.3774	65.9165	61.5949	71.191
AKTIP	6.16342	10.4893	6.92073	1.64877	3.81818	2.21168	3.79376	2.82001	2.87417
ALAD	35.4739	33.3619	33.9116	28.3954	31.6909	32.3791	36.5149	31.1685	34.7112
ALAS1	32.1868	31.031	23.5305	43.0511	46.3909	36.8024	50.2673	42.7454	44.4391
ALCAM	514.851	509.17	477.53	108.086	104.236	107.311	140.843	140.258	142.161
ALDH16A1	11.642	10.7807	12.8033	6.59507	9.16364	7.43126	9.01018	6.97581	9.0647
ALDH18A1	132.719	128.932	132.878	79.6904	78.6546	74.9319	75.8752	82.6708	85.5619
ALDH1A1	195.038	184.583	177.517	4.39671	4.39091	5.48498	5.21642	5.78844	5.08507
ALDH1B1	53.4163	57.5457	51.2134	13.7397	11.6455	13.8009	7.58752	6.97581	11.2756
ALDH1L2	105.326	104.748	102.773	31.3266	38.5637	42.8182	27.979	29.6843	33.8268
ALDH2	22.8731	28.8457	22.8384	15.3885	12.6	16.278	12.3297	19.5916	17.4661
ALDH3A2	14.1074	14.1315	12.8033	12.091	12.9818	14.951	26.0821	25.3801	23.4356
ALDH3B1	23.1471	28.9914	29.7591	7.69424	9.35455	11.0584	12.8039	12.4674	10.6123
ALDH4A1	15.3401	17.7736	15.9177	4.39671	2.86364	5.04264	3.31954	2.96843	5.08507
ALDH5A1	0.958755	1.0198	1.38415	0.183196	0	0.442337	0.47422	0.445265	0.66327
ALDH6A1	33.0085	31.031	29.0671	18.3196	13.9364	17.3396	11.8555	14.5453	13.7076
ALDH7A1	35.063	37.5868	32.8735	12.6405	13.5546	14.7741	16.5977	13.8032	17.4661
ALDH8A1	0	0.145685	0	0	0	0.442337	0	0.148422	0.44218
ALDH9A1	128.473	129.223	120.075	114.681	116.646	121.289	127.565	117.105	135.307
ALDOA	476.364	490.668	425.971	559.665	552.109	527.62	641.145	554.206	588.542
ALDOC	4.51984	4.37056	6.22865	4.21351	5.34546	3.45023	2.3711	3.11685	3.31635
ALG1	11.5051	9.76092	12.4573	8.42703	11.4546	10.1737	12.3297	11.4285	13.0443
ALG10	4.51984	6.9929	7.95884	3.11434	4.39091	2.65402	3.31954	2.0779	2.87417
ALG10B	21.7774	21.2701	17.9939	11.3582	9.54546	10.8815	12.8039	13.5064	14.1498
ALG11	13.4226	15.8797	14.8796	10.9918	12.7909	10.0853	8.53596	9.05371	5.96943
ALG12	17.1206	18.502	21.8003	16.4877	14.3182	15.1279	20.8657	17.5137	19.0138
ALG13	49.7183	52.7381	49.1372	52.7605	51.7364	54.319	43.154	47.198	49.9664
ALG14	10.6833	14.5685	16.2637	10.0758	8.59091	10.0853	8.53596	10.0927	8.18034
ALG1L9P	0	0.728427	0.692073	0	0	0.619272	0	0	0.22109
ALG2	70.4	72.697	71.2835	71.8129	73.3091	65.2889	61.1743	68.1255	65.4427
ALG3	38.3502	34.2361	33.9116	43.2343	41.2364	36.3601	45.9993	41.558	40.6806
ALG5	29.1735	33.2163	31.1433	24.9147	30.3546	28.6634	23.711	33.2464	27.1941
ALG6	12.8747	15.4426	10.7271	10.0758	6.3	6.90046	6.16486	8.46003	6.41161
ALG8	57.2513	53.1752	51.2134	49.6462	44.1	47.2416	45.9993	47.7917	44.8813
ALG9	33.2825	36.567	30.7972	24.7315	21.7636	22.0284	20.3914	19.8885	21.4457
ALKBH1	13.5595	12.6746	14.1875	14.6557	13.5546	15.3049	10.9071	14.8422	13.4865
ALKBH2	4.93074	6.55584	7.6128	3.29753	4.58182	3.71563	3.31954	2.22632	4.86398
ALKBH3	11.0942	11.3635	11.0732	9.52621	7.63637	10.1737	6.16486	6.97581	7.29597
ALKBH3.AS1	0.27393	1.0198	0	0.183196	0.190909	0.176935	0.94844	0.148422	0.22109
ALKBH4	3.83502	4.37056	2.76829	2.93114	2.29091	3.36176	0	3.85896	3.97962
ALKBH5	72.8653	63.5188	74.7438	78.0416	73.6909	69.1815	74.9267	78.8118	75.6128
ALKBH6	7.94397	10.4893	12.1113	7.14465	7.06364	5.92732	4.7422	8.01476	11.0545
ALKBH7	8.90272	10.635	7.95884	9.34301	12.6	8.49287	11.8555	9.94424	15.0341
ALKBH8	17.9424	21.2701	20.0701	25.0979	29.7818	31.3175	23.711	27.6064	27.8574
ALMS1	33.2825	30.7396	30.4512	23.0827	24.4364	24.9478	20.8657	17.6622	17.245
ALMS1.IT1	0.958755	0.437056	0	0.549589	0.572728	0.796207	0.94844	0	0.22109
ALOX12	1.78054	1.0198	1.38415	0.366393	0.381818	0.442337	0.47422	0.445265	1.32654
ALOX12.AS1	1.23268	1.31117	1.73018	0.549589	0.572728	0.796207	0.47422	1.03895	0.44218
ALOXE3	0.27393	0.145685	0.692073	1.64877	0.381818	1.32701	2.3711	2.22632	1.98981
ALPK1	14.1074	12.3833	14.5335	5.67908	8.59091	9.55448	4.26798	4.74949	7.51706
ALPK2	160.797	145.54	125.265	29.6778	29.0182	28.575	19.443	15.8811	19.0138
ALPK3	0.54786	0.291371	0.346036	0	0.763637	0.176935	0.94844	0.296843	0.22109
ALPL	0.410895	0.291371	0	0.915981	1.52727	1.15008	0	0.296843	0.22109
ALS2	110.942	118.442	128.033	55.8749	51.1637	56.1768	55.4837	56.8454	53.7249
ALS2CL	2.05447	2.91371	2.42225	0.366393	1.33636	1.41548	0	0.742108	1.10545
ALS2CR12	0.82179	0.728427	1.38415	0.549589	1.14546	0.973141	0.94844	0.742108	1.32654
ALX3	0.82179	0.728427	1.38415	1.09918	0.763637	0.973141	1.42266	1.03895	0.884361
ALYREF	30.8171	30.3026	28.375	24.7315	19.2818	23.5323	23.711	21.6695	26.7519
AMACR	0.54786	1.0198	0	0.366393	0.954546	0.35387	0.47422	0.593686	0.44218
AMBRA1	20.6817	23.3097	19.032	18.8692	23.1	21.8514	27.5047	25.2317	21.6668
AMD1	386.926	354.598	386.523	331.585	326.073	317.333	270.305	279.181	269.067
AMDHD1	0	0.145685	0	0.183196	0.763637	0.176935	1.42266	0.593686	0.66327
AMDHD2	5.0677	5.82741	4.49847	8.61022	6.10909	8.139	8.53596	8.16318	8.18034
AMER1	6.43735	6.41016	6.57469	3.48073	5.53637	4.77724	5.21642	3.85896	2.87417
AMFR	132.445	134.031	141.875	117.246	115.118	105.63	123.771	119.182	106.123
AMH	0.410895	0.145685	0.346036	0.183196	0.381818	0.0884674	0.47422	0.296843	1.10545
AMIGO1	6.43735	5.39036	3.46036	3.29753	2.48182	2.12322	3.79376	2.52317	2.43199
AMIGO2	17.5315	15.8797	13.1494	0.549589	1.33636	1.59241	1.42266	1.63264	0.44218
AMIGO3	5.4786	3.35076	5.19054	2.38155	2.67273	3.45023	2.84532	3.71054	2.65308
AMMECR1	65.6062	68.0351	61.9405	37.1888	37.6091	43.7029	57.8548	66.9381	57.4834
AMMECR1L	53.2794	50.5528	48.099	61.5539	63.7637	59.1847	58.8032	55.8065	63.2318
AMN1	8.90272	8.15838	7.95884	9.8926	8.4	11.5892	9.95861	12.0221	9.72797
AMOT	1.64358	1.60254	1.73018	0.732785	0	0.707739	0.94844	0.296843	1.10545
AMOTL1	208.735	190.119	195.164	127.505	133.636	124.208	147.008	124.674	125.579
AMOTL2	163.947	174.968	169.558	32.9753	42.5727	30.9636	24.1852	20.4822	23.2145
AMPD2	90.5338	97.3178	93.4298	124.573	125.427	111.823	110.493	94.9898	101.701
AMPD3	18.9012	18.3564	20.4161	150.587	156.355	151.014	87.2564	80.1476	90.647
AMPH	7.12218	8.59544	6.92073	4.7631	2.67273	2.38862	4.26798	5.04633	4.64289
AMT	4.10895	1.60254	3.11433	0.732785	1.14546	1.85782	0.47422	0.445265	1.54763
AMY2B	3.56109	4.22488	4.84451	4.57991	1.33636	3.27329	3.31954	3.85896	4.64289
AMZ1	9.72451	11.0721	7.6128	12.4573	11.4546	9.20061	7.1133	12.4674	11.0545
AMZ2	48.0747	51.864	43.9466	34.0745	31.6909	40.7835	39.8345	38.5896	35.8166
AMZ2P1	4.51984	3.05939	5.53658	1.09918	2.1	1.59241	1.42266	1.92948	1.32654
ANAPC1	29.8584	28.263	25.2607	21.2508	21.9546	17.8704	21.3399	18.998	19.2348
ANAPC10	14.7922	14.4228	16.2637	13.0069	13.3636	14.4202	9.95861	12.319	10.8334
ANAPC11	53.2794	62.7904	59.5182	40.4864	38.3727	46.4454	45.9993	51.9475	51.514
ANAPC13	107.791	103	100.004	81.3391	74.8364	78.9129	54.5353	66.6413	65.8849
ANAPC15	1.91751	2.91371	0.692073	2.19836	1.90909	1.85782	3.79376	2.0779	2.2109
ANAPC16	58.621	52.4467	52.5975	35.7233	40.6637	34.3253	35.5665	34.5822	31.6159
ANAPC2	16.5728	16.6081	15.9177	13.7397	13.5546	15.0395	12.8039	11.5769	16.1396
ANAPC4	40.1307	40.7919	42.5625	27.8458	33.7909	28.7519	24.6594	31.4654	31.1737
ANAPC5	108.75	109.847	118.344	82.2551	79.2273	87.0519	82.04	82.9676	86.2252
ANAPC7	58.758	57.6914	60.9024	50.9286	51.1637	49.0994	60.2259	55.6581	52.8405
ANG	0.54786	0.145685	0.346036	1.28237	1.90909	0.707739	0.94844	1.33579	1.54763
ANGEL1	22.1883	17.1909	19.378	19.0524	21.1909	19.6398	22.2883	21.9664	23.2145
ANGEL2	51.0879	53.4665	59.5182	50.379	48.8727	46.9762	41.7313	39.3317	40.4595
ANGPT1	161.893	149.91	165.059	4.39671	4.2	4.77724	2.3711	7.12423	7.51706
ANGPT2	0.684825	0.582741	1.38415	0.366393	0.572728	0.442337	0.47422	0.296843	0.44218
ANGPTL1	1.36965	1.89391	3.46036	0.366393	1.14546	0.707739	0	1.33579	1.54763
ANGPTL2	13.9704	12.0919	12.8033	7.32785	6.68182	6.81199	16.5977	11.4285	11.7178
ANGPTL4	3.97198	3.78782	4.84451	74.5609	73.8818	65.4659	178.781	151.39	167.365
ANGPTL7	0	0	0.692073	0.183196	0	0	0.47422	0	0
ANGPTL8	0	0.291371	0	0	0.381818	0.176935	0.47422	0	0
ANK1	19.449	24.0381	17.9939	3.84712	3.05455	2.65402	1.89688	4.45265	5.08507
ANK2	2.46537	3.35076	3.46036	1.46557	0.572728	1.23854	2.3711	1.63264	1.76872
ANK3	0.136965	0	0	9.7094	11.6455	11.0584	15.175	12.4674	15.0341
ANKAR	5.0677	4.07919	3.8064	2.19836	2.48182	3.18483	1.42266	1.92948	3.09526
ANKDD1A	8.76576	11.9462	11.7652	5.49589	8.59091	8.31593	5.69064	6.67897	4.4218
ANKDD1B	0.82179	0.145685	0.346036	0	0.190909	0.35387	0	0.445265	0.44218
ANKEF1	3.56109	4.37056	6.57469	0.183196	0.763637	0.707739	0	0	0.22109
ANKFY1	156.14	168.704	184.783	125.306	127.718	125.712	121.4	139.516	135.97
ANKH	71.4957	73.134	59.5182	116.696	111.873	105.011	152.699	171.13	166.702
ANKHD1	10.4093	9.46955	7.95884	10.6254	9.54546	7.69666	10.9071	6.97581	9.50688
ANKIB1	194.079	193.762	200.009	167.625	173.918	165.876	164.554	155.546	158.743
ANKLE1	0.27393	0.437056	1.03811	0.366393	0.763637	0.35387	0.94844	0.890529	0.66327
ANKLE2	89.1642	89.1594	81.6646	96.178	91.6364	96.0756	106.225	104.34	104.576
ANKMY1	2.46537	3.35076	3.46036	4.03032	3.24546	3.62716	2.84532	3.41369	1.76872
ANKMY2	41.6373	34.5274	37.3719	23.6323	27.3	26.0094	20.3914	25.2317	25.8675
ANKRA2	30.8171	31.3224	27.6829	26.3803	28.8273	31.7598	26.0821	28.0517	28.7417
ANKRD1	2.3284	2.18528	1.73018	0	0	0.0884674	0	0	0
ANKRD10	42.1852	40.3548	32.8735	44.5167	49.8273	42.6413	38.4118	41.4096	41.5649
ANKRD11	183.259	180.504	184.091	181.914	175.064	181.977	182.575	185.824	207.825
ANKRD12	179.15	172.637	183.745	162.678	148.336	152.518	138.946	147.976	139.066
ANKRD13A	299.131	310.31	329.427	114.498	122.946	111.292	80.1431	75.8434	77.3815
ANKRD13B	2.7393	2.47665	2.42225	2.38155	1.52727	1.85782	1.42266	1.63264	1.54763
ANKRD13C	58.8949	59.8767	54.6737	60.4548	63	63.0772	52.6384	63.0791	63.8951
ANKRD13D	17.5315	18.9391	14.1875	22.1667	17.9455	22.3822	14.7008	20.1853	26.0886
ANKRD16	2.87626	3.35076	2.76829	2.38155	3.24546	2.38862	1.42266	1.63264	2.43199
ANKRD17	217.5	204.834	193.088	221.118	225.846	230.192	204.389	208.532	213.794
ANKRD18B	3.15019	2.76802	1.38415	0.549589	1.14546	0.707739	1.42266	0.890529	0.66327
ANKRD19P	3.83502	2.33097	1.73018	1.83196	2.67273	3.18483	3.31954	2.22632	2.2109
ANKRD20A5P	0	0	0	0.549589	0	0.0884674	0	0.296843	0.22109
ANKRD23	1.36965	1.45685	1.38415	1.28237	0.572728	1.50395	2.3711	0.445265	1.32654
ANKRD24	0.27393	0	0	0	0	0.176935	0.94844	0.148422	0
ANKRD26	52.8685	43.5599	44.6387	40.3032	40.6637	41.8451	46.4735	36.5117	42.8915
ANKRD27	44.2397	38.1696	40.4863	37.372	30.3546	34.0599	30.8243	28.2001	32.0581
ANKRD28	164.221	156.32	164.367	130.985	141.655	143.494	120.452	125.268	115.409
ANKRD29	19.8599	19.5218	17.9939	40.6696	43.3364	39.4565	53.1126	41.4096	44.4391
ANKRD33B	12.6008	10.9264	13.4954	1.64877	1.71818	1.50395	1.42266	2.82001	2.87417
ANKRD34A	9.86148	8.44975	12.1113	6.96146	5.72728	5.04264	4.26798	4.30422	3.75853
ANKRD35	0.684825	1.0198	1.03811	0.549589	0.381818	0.619272	0.47422	0.148422	0.66327
ANKRD36	4.10895	4.9533	5.53658	2.38155	2.67273	2.12322	1.42266	3.26527	2.2109
ANKRD36B	1.64358	2.33097	1.73018	1.64877	0.954546	1.23854	0.47422	1.48422	0.884361
ANKRD36BP1	29.4475	24.6208	31.1433	19.2356	20.4273	16.7203	18.4946	26.1222	18.3505
ANKRD36C	11.9159	6.9929	8.65091	4.21351	4.00909	6.45812	7.58752	4.1558	3.09526
ANKRD37	0.136965	0.582741	0.346036	1.28237	0.190909	1.32701	1.89688	1.18737	1.10545
ANKRD39	6.57432	5.24467	5.19054	5.67908	5.91818	4.77724	7.1133	5.34317	6.41161
ANKRD40	118.475	103.728	111.77	107.17	99.6546	111.823	95.7924	94.9898	95.0688
ANKRD42	33.8303	27.3888	33.9116	38.288	38.7546	36.8024	28.4532	35.1759	37.1431
ANKRD44	13.6965	14.5685	15.9177	18.686	16.4182	18.3127	43.154	42.1517	43.1126
ANKRD45	0.410895	0.145685	1.03811	0	0.190909	0.0884674	0	0	0
ANKRD46	12.1899	17.1909	17.3018	12.6405	16.2273	19.109	24.1852	29.5359	25.2043
ANKRD49	13.9704	11.2178	16.2637	11.9078	15.6546	14.5087	9.95861	11.5769	11.0545
ANKRD50	131.075	117.568	128.726	143.992	143.755	141.548	148.905	171.724	150.783
ANKRD52	165.454	164.916	155.024	158.465	162.846	146.414	189.688	170.388	174.882
ANKRD53	0.54786	0.437056	1.03811	0	0.190909	0.176935	0	0	0
ANKRD54	19.1751	18.3564	16.9558	21.2508	21.1909	17.605	26.5563	19.5916	24.0988
ANKRD6	0.958755	0.874112	1.03811	1.09918	1.33636	0.619272	0.47422	1.03895	1.10545
ANKRD61	1.50661	1.60254	1.73018	0.366393	0.381818	1.06161	1.42266	0.890529	0.44218
ANKRD65	0	0.437056	0.346036	0.183196	0	0.0884674	0	0.593686	0
ANKRD9	16.1619	13.2574	17.6479	11.5414	13.1727	11.0584	11.3813	12.4674	9.94906
ANKS1A	24.7907	30.8853	20.0701	32.7921	34.5546	32.9983	28.4532	28.0517	34.269
ANKS1B	0.684825	1.16548	0.692073	0.549589	0.381818	0.442337	0.47422	0	0.44218
ANKS3	7.53307	8.01269	7.26676	4.9463	4.2	3.71563	9.01018	4.45265	3.31635
ANKS6	18.0794	16.3168	12.4573	9.15981	10.3091	7.96207	12.8039	12.0221	9.72797
ANKZF1	9.31362	10.0523	10.0351	7.32785	8.4	8.22747	11.3813	9.05371	9.28579
ANLN	240.1	259.32	274.753	53.1269	54.7909	55.0267	8.06174	10.9832	7.07488
ANO10	75.7416	81.5838	78.2042	105.521	111.682	114.388	86.7822	91.7245	89.3204
ANO3	3.15019	3.64213	5.88262	0.915981	1.33636	1.68088	1.89688	1.03895	0.66327
ANO4	22.1883	24.6208	21.4543	6.04548	4.00909	3.5387	2.3711	3.56212	4.64289
ANO6	290.503	270.829	266.448	187.227	193.582	198.875	193.482	198.736	186.6
ANO7	0.684825	0.437056	0	1.28237	2.1	1.59241	0.94844	2.67159	3.53744
ANO8	2.87626	2.76802	3.11433	2.74794	4.77273	3.36176	5.69064	5.64002	5.96943
ANOS1	0.958755	1.45685	1.03811	58.9892	52.5	56.6191	79.6689	95.8803	84.8986
ANP32A	56.7035	52.1554	57.096	47.0814	45.6273	42.8182	33.1954	42.1517	41.786
ANP32A.IT1	0.684825	0.145685	0	1.09918	1.14546	0.884674	0.47422	0.742108	1.10545
ANP32AP1	1.23268	2.33097	4.49847	2.56475	1.90909	2.12322	1.42266	1.63264	1.54763
ANP32B	124.09	124.124	127.341	91.4149	80.9455	87.0519	45.9993	49.2759	51.9562
ANP32C	0.82179	1.60254	0.346036	0.915981	1.52727	1.23854	0.47422	1.03895	0.66327
ANP32D	0.136965	0.291371	0.346036	0.183196	0.572728	0.35387	0.47422	0.148422	0.22109
ANP32E	122.721	132.574	146.027	103.323	106.718	108.373	99.5861	101.817	95.0688
ANPEP	595.113	626.738	593.106	3069.64	3058.17	2898.28	2455.98	2240.27	2384.02
ANTXR1	359.122	318.177	289.632	198.402	197.591	207.633	171.193	174.989	184.168
ANTXR2	130.665	131.117	132.878	207.012	219.164	215.33	184.471	180.926	173.556
ANXA1	1089.15	1105.31	1116.31	1509.54	1473.25	1544.64	2188.05	2337.79	2198.74
ANXA10	1.50661	0.728427	1.38415	54.0429	55.5546	54.319	48.8446	42.597	47.3133
ANXA11	140.115	140.878	148.45	86.4686	86.2909	77.6744	78.2463	77.0308	89.5415
ANXA2	852.881	871.635	810.417	555.451	531.3	561.856	732.67	744.037	754.802
ANXA2P1	24.7907	25.4949	19.378	11.9078	11.8364	17.8704	19.9172	20.4822	17.4661
ANXA2P2	431.987	430.792	438.082	282.122	282.164	298.312	349.026	363.039	350.87
ANXA2P3	9.17665	9.32386	10.3811	5.49589	7.06364	5.48498	5.69064	9.20213	7.07488
ANXA2R	1.09572	1.0198	0.346036	1.64877	2.29091	2.12322	3.79376	2.67159	3.53744
ANXA3	5.20467	4.37056	6.22865	0.915981	0.763637	1.06161	0	0.445265	0.22109
ANXA4	122.173	124.415	130.11	83.7207	83.0455	88.9982	90.576	114.878	100.154
ANXA5	1015.05	991.243	993.816	740.846	756.191	760.82	564.322	595.912	603.134
ANXA6	331.318	339.301	307.28	172.021	167.809	175.342	178.307	176.622	172.671
ANXA7	178.054	185.895	180.977	161.396	169.527	167.646	156.493	166.084	159.185
ANXA9	0.958755	1.16548	0	1.09918	0.572728	0.796207	1.42266	1.03895	0.66327
AOC2	1.64358	0.437056	0.692073	0.366393	1.14546	0.707739	0.47422	1.48422	1.10545
AOC3	0	0.145685	0	0.183196	0.190909	0.35387	0.94844	0.445265	0
AOX1	62.593	63.5188	68.5152	32.4257	33.2182	33.7945	7.58752	10.5379	9.50688
AP1AR	55.0599	52.301	57.442	125.123	137.646	135.444	122.349	132.837	135.307
AP1B1	85.1922	92.5102	92.3917	65.4011	60.1364	64.1389	72.0814	60.7044	69.4223
AP1G1	203.393	192.305	197.241	196.936	194.727	191.709	159.338	180.777	163.386
AP1G2	9.03969	9.46955	6.92073	4.39671	4.96364	4.86571	4.26798	4.89791	5.08507
AP1M1	68.3455	66.5782	71.9756	54.9589	52.1182	54.2305	69.2361	54.3223	58.3678
AP1S1	44.3766	47.3477	49.1372	59.3556	56.3182	50.4264	61.1743	52.8381	53.7249
AP1S2	36.9805	31.031	36.6799	22.7163	27.8727	25.744	40.3087	43.6359	43.5548
AP1S3	16.7097	13.6944	19.032	3.66393	3.62727	3.36176	7.1133	6.2337	6.41161
AP2A1	70.126	74.7366	73.7057	58.6228	56.5091	54.5844	65.9165	64.8602	58.1467
AP2A2	4.38288	5.09899	3.11433	3.84712	4.00909	4.24643	3.79376	6.82739	5.08507
AP2B1	278.176	266.459	250.53	182.097	203.7	196.132	174.039	189.683	176.209
AP2M1	448.834	460.366	432.891	324.99	324.927	337.592	368.943	370.163	368.778
AP2S1	79.8506	82.7493	78.8963	92.1477	89.5364	89.7944	108.596	111.019	114.304
AP3B1	135.321	133.593	140.145	144.908	147.764	148.271	156.018	167.865	161.175
AP3D1	198.325	197.549	203.469	202.249	213.055	195.601	200.595	184.488	191.906
AP3M1	119.57	124.561	122.843	116.879	116.073	119.519	99.1119	98.255	110.545
AP3M2	31.7759	31.1767	28.721	19.7852	22.5273	24.7709	18.4946	25.6769	19.677
AP3S1	104.504	104.019	115.576	82.6215	84.3819	87.8481	77.772	86.5297	78.9292
AP3S2	1.36965	1.31117	3.46036	1.09918	0.572728	0.973141	0.94844	1.18737	1.10545
AP4B1	11.2311	8.59544	11.4192	9.15981	7.25455	7.96207	3.31954	8.16318	6.85379
AP4B1.AS1	0.82179	0.582741	0.346036	1.64877	1.52727	0.796207	0	0.593686	1.10545
AP4E1	60.6755	53.7579	70.9374	53.8597	56.8909	55.9114	59.7517	52.6896	55.7147
AP4M1	5.75253	5.09899	4.15244	5.67908	7.44546	9.46601	13.2782	9.05371	11.2756
AP4S1	8.76576	8.15838	8.30487	9.34301	7.06364	7.51973	8.53596	5.64002	7.95925
AP5B1	14.3813	16.3168	15.9177	23.4491	21	18.3127	25.6079	21.9664	22.5512
AP5M1	87.3836	83.6234	88.5853	68.3322	72.1637	70.0662	74.4525	67.6802	64.5583
AP5S1	9.17665	8.74112	10.3811	7.87744	7.63637	8.139	9.95861	8.16318	10.8334
AP5Z1	24.2428	23.601	24.2225	29.4946	28.6364	26.7172	33.6696	28.2001	30.9526
APAF1	67.7976	65.9955	67.8231	54.4093	45.6273	52.7266	64.4939	55.2128	57.0413
APBA1	1.09572	1.31117	1.73018	4.39671	5.34546	3.18483	2.84532	1.78106	2.43199
APBA2	0.410895	0.582741	0	0.183196	0.190909	0.265402	0.47422	0.148422	0.22109
APBA3	7.807	8.44975	8.99694	8.79342	7.63637	6.28118	8.53596	7.27265	7.29597
APBB1	27.53	27.9716	29.7591	27.2962	29.5909	28.6634	34.1438	32.3559	38.0275
APBB1IP	82.042	73.8625	68.1692	64.8515	65.1	64.5812	43.154	50.9086	53.5038
APBB2	125.871	126.164	138.415	200.234	186.709	197.017	110.493	122.002	121.378
APBB3	4.51984	6.26447	5.88262	2.93114	2.29091	3.98103	3.79376	2.96843	5.74834
APC	131.623	135.487	134.954	95.6284	96.9819	99.2604	67.8134	81.6318	83.1299
APC2	1.36965	1.16548	2.07622	1.28237	0.954546	0.796207	4.7422	1.92948	2.87417
APCDD1	9.31362	10.198	9.34298	2.19836	2.67273	1.41548	2.84532	1.18737	1.10545
APCDD1L	39.5829	42.9772	30.1052	132.634	132.873	131.02	153.173	165.342	170.239
APCDD1L.DT	5.61556	4.22488	3.46036	8.61022	8.59091	12.4739	12.3297	12.0221	11.4967
APEH	47.8008	45.8909	42.2164	36.0897	37.9909	37.3332	28.4532	29.5359	27.6363
APEX1	108.75	108.099	106.579	97.4604	96.4091	97.4026	94.844	88.014	82.0244
APEX2	13.6965	14.4228	11.4192	14.6557	13.9364	12.4739	9.4844	12.0221	13.9287
APH1A	71.7696	69.6376	64.7088	66.5002	59.3728	52.0188	42.2056	50.9086	52.3984
APH1B	39.172	42.8315	44.9847	55.3253	50.9727	54.8498	65.9165	77.3276	68.3169
API5	157.921	149.765	153.64	118.711	120.655	126.862	128.514	127.346	118.725
APIP	24.2428	24.1838	29.7591	29.4946	35.7	35.2985	32.7212	31.9106	29.1839
APLF	6.57432	6.70153	4.84451	5.86228	3.62727	5.13111	4.26798	4.60107	3.97962
APLP1	4.65681	5.53604	4.15244	2.56475	1.52727	2.12322	2.84532	4.30422	3.97962
APLP2	912.186	891.886	852.287	1402.73	1351.64	1321.97	1454.91	1428.26	1394.42
APMAP	88.0685	89.1594	90.3155	78.408	76.7455	84.9287	104.803	99.294	97.5008
APOA1.AS	0.136965	0.437056	0	0.183196	0.190909	0	0.47422	0.148422	0.22109
APOBEC2	0.54786	0	0.346036	0	0	0	0.47422	0.148422	0.22109
APOBEC3B	0.958755	1.89391	3.46036	1.09918	0.572728	0.530804	0	0	0
APOBEC3C	22.3253	26.6604	26.6448	15.2053	12.0273	13.5355	17.5461	13.8032	17.245
APOBEC3D	1.09572	0.145685	1.38415	0.366393	0.763637	0.530804	0.94844	1.18737	0.44218
APOBEC3F	3.15019	2.33097	4.15244	1.28237	0.763637	1.76935	4.7422	2.67159	3.09526
APOBEC3G	1.78054	1.74822	3.11433	1.83196	1.14546	2.21168	2.3711	2.96843	3.75853
APOBEC4	0	0	0.692073	0	0	0	0.47422	0	0
APOC1	0.136965	0.437056	0	0.183196	0.381818	0	0.47422	0.296843	0.22109
APOD	3.15019	1.16548	2.42225	1.46557	1.14546	1.23854	0.94844	1.18737	1.76872
APOE	0.54786	0.291371	1.03811	0.366393	0.572728	0.176935	0	0.148422	0.22109
APOL1	8.76576	7.42995	7.6128	0.732785	0.572728	0.707739	0.47422	0.593686	2.2109
APOL2	24.6537	24.1838	22.8384	6.22867	4.2	6.54659	16.1235	16.4748	16.1396
APOL3	2.7393	2.03959	1.73018	0.183196	0.763637	0.442337	0.94844	0.445265	0.44218
APOL6	43.9657	46.1823	59.8643	13.9229	16.0364	16.0126	17.0719	19.7401	19.2348
APOLD1	25.7494	25.2036	27.3369	9.52621	8.78182	8.4044	9.95861	8.46003	8.62252
APOO	5.4786	5.09899	7.6128	3.84712	4.39091	3.62716	7.1133	4.60107	5.30616
APOOL	56.7035	50.9899	50.1753	41.7687	45.2455	36.9794	34.1438	36.8085	38.0275
APOPT1	28.2148	32.4878	32.8735	26.7467	30.9273	27.3364	28.9274	31.1685	32.9424
APP	722.901	703.952	676.501	902.608	913.882	851.764	888.214	926.447	925.704
APPBP2	145.32	132.574	156.408	125.306	126.382	125.358	119.503	121.112	105.681
APPL1	84.7813	83.7691	87.2012	94.8957	93.5455	102.445	102.431	98.255	96.1742
APPL2	173.261	172.2	161.599	105.521	105.764	105.895	90.1018	86.8266	81.8034
APRT	41.5004	50.6985	46.0228	53.3101	50.4	46.5338	45.9993	45.7138	46.2078
APTR	4.93074	8.01269	5.88262	3.11434	3.43637	3.27329	2.84532	3.85896	3.53744
APTX	28.6257	24.9122	26.6448	17.9532	19.2818	23.2669	18.0204	23.8959	24.3199
AQP1	0.54786	0.582741	1.03811	0.183196	0.190909	0.176935	0	0.148422	0.22109
AQP11	3.28716	1.89391	2.07622	1.83196	1.52727	2.03475	3.79376	1.78106	2.2109
AQP3	0.410895	0.145685	0.346036	0.183196	0.190909	0.0884674	0.47422	0	0
AQR	75.1937	65.8498	65.7469	60.638	64.9091	63.4311	68.7619	63.2276	61.242
AR	58.621	56.6716	53.9817	28.029	29.2091	28.2211	35.5665	32.6527	28.2995
ARAF	33.0085	39.335	34.6036	26.7467	31.1182	25.744	27.0305	29.3875	32.7213
ARAP1	52.5945	53.3208	47.407	96.9108	82.2819	82.1862	91.5244	75.8434	86.4462
ARAP1.AS2	0.136965	0.582741	0.346036	0.549589	0.572728	0.796207	1.42266	0.890529	0.44218
ARAP3	14.2444	14.2772	13.1494	32.9753	29.7818	32.0252	37.4634	26.1222	23.6566
ARC	0	0	0	1.28237	0.381818	0.530804	0	0.445265	0.66327
ARCN1	444.725	424.527	393.789	501.958	490.827	495.771	577.125	555.839	544.103
AREG	15.8879	18.065	23.5305	114.131	131.346	121.112	97.6893	97.2161	105.239
AREL1	45.0615	45.4538	41.5244	66.5002	71.7818	62.1926	83.4627	73.4686	79.8135
ARF1	483.486	503.634	506.251	583.48	584.755	574.065	524.013	524.967	535.259
ARF3	137.924	146.705	130.11	163.411	161.891	154.022	185.894	161.928	166.702
ARF4	728.243	701.184	748.823	664.086	670.664	657.932	705.165	755.465	716.111
ARF4.AS1	0.54786	0.437056	1.03811	0.183196	0.190909	0.0884674	0	0.296843	0
ARF5	39.3089	42.8315	38.7561	33.1585	33.0273	30.0789	36.0407	33.6917	40.0173
ARF6	245.852	250.287	271.985	126.772	126.764	123.324	114.287	116.808	114.304
ARFGAP1	63.6887	70.8031	65.4009	71.6297	75.4091	66.7044	73.9783	72.5781	80.2557
ARFGAP2	31.091	31.1767	31.8353	23.4491	25.5818	27.1595	27.5047	22.5601	20.5614
ARFGAP3	131.486	136.507	138.761	112.849	114.164	125.27	144.163	137.438	139.066
ARFGEF1	139.978	134.759	134.262	134.283	133.636	126.331	130.885	119.925	117.62
ARFGEF2	163.536	155.301	153.64	163.961	166.473	171.981	161.709	152.132	147.467
ARFGEF3	0.136965	0.145685	0.346036	0.183196	0.190909	0	0.47422	0	0.884361
ARFIP1	94.0949	86.2457	90.3155	85.919	82.0909	94.2178	80.6174	89.0529	87.3306
ARFIP2	34.6521	39.7721	32.1814	39.204	43.9091	40.3411	42.6798	40.6675	45.9867
ARFRP1	21.0926	22.5812	22.4924	19.7852	14.3182	17.9589	13.7524	16.6232	19.2348
ARG2	16.7097	16.4624	15.2256	36.8224	33.6	32.2906	36.5149	37.8475	44.6602
ARGLU1	116.42	119.171	120.767	95.8116	92.7819	93.7754	91.0502	85.0455	93.7422
ARHGAP1	112.311	122.521	103.119	98.01	91.6364	96.2525	93.8955	86.2329	97.5008
ARHGAP10	39.7198	42.6858	47.753	32.9753	34.9364	33.883	34.1438	31.0201	31.6159
ARHGAP11A	0.54786	0.437056	0	0	0.381818	0.265402	0.47422	0.296843	0
ARHGAP12	104.641	101.543	100.004	97.2772	98.7	92.2715	74.4525	85.4908	82.4666
ARHGAP17	54.2381	54.0493	53.9817	33.5249	31.5	31.3175	38.886	40.8159	32.7213
ARHGAP18	165.591	165.644	155.024	176.052	170.1	185.87	127.565	116.956	139.95
ARHGAP19	12.1899	15.0056	13.4954	12.4573	15.4636	16.4549	28.9274	24.3411	26.0886
ARHGAP20	13.6965	13.9858	12.4573	0.732785	0.381818	0.707739	0.47422	0.742108	0.22109
ARHGAP21	165.865	164.624	146.719	255.009	260.4	255.936	220.512	241.185	240.325
ARHGAP22	41.0895	45.1625	40.1402	126.222	124.473	126.862	116.658	107.902	116.072
ARHGAP22.IT1	0	0.145685	0.346036	0.183196	0.190909	0.530804	0	0.445265	0
ARHGAP23	2.87626	2.76802	3.11433	2.74794	3.43637	1.85782	1.42266	2.22632	3.75853
ARHGAP24	59.0319	59.2939	47.407	102.224	98.7	102.268	75.4009	84.8971	86.0041
ARHGAP26	4.79377	7.57564	4.15244	5.86228	5.53637	5.83885	13.7524	13.0611	9.72797
ARHGAP27P1	2.60233	2.33097	2.07622	3.29753	2.67273	3.98103	5.21642	3.56212	2.87417
ARHGAP27P1.BPTFP1.KPNA2P3	10.1354	7.28427	8.99694	17.9532	15.0818	17.4281	17.0719	22.7085	24.0988
ARHGAP28	0.684825	0.582741	0.692073	1.09918	0.572728	1.32701	1.89688	1.92948	1.32654
ARHGAP29	708.246	720.997	767.163	190.158	179.264	182.066	67.3392	71.3907	74.2863
ARHGAP31	31.6389	33.6533	32.1814	58.4396	57.2728	53.2574	42.2056	49.4244	50.4086
ARHGAP32	23.9689	25.0579	21.8003	23.2659	19.0909	24.3285	29.4016	25.2317	23.6566
ARHGAP33	4.24591	4.22488	3.11433	0.915981	1.14546	1.50395	1.42266	0.445265	0.44218
ARHGAP35	145.183	140.878	129.418	81.5223	91.8273	88.1135	82.9885	66.196	72.7387
ARHGAP39	4.24591	4.22488	4.15244	5.86228	6.49091	4.86571	8.53596	7.12423	5.52725
ARHGAP42	4.51984	5.53604	6.92073	4.9463	7.25455	5.30804	6.63908	8.90529	7.73815
ARHGAP44	2.46537	3.35076	4.49847	1.46557	2.86364	1.76935	2.3711	2.0779	2.2109
ARHGAP45	2.05447	2.18528	1.03811	1.64877	1.33636	1.50395	0.47422	2.22632	1.10545
ARHGAP5	255.85	252.473	289.978	315.83	310.991	318.571	494.611	549.16	515.803
ARHGAP5.AS1	2.05447	1.89391	2.07622	4.03032	6.10909	4.24643	16.5977	15.2874	10.3912
ARHGAP6	5.34163	2.91371	3.8064	1.28237	1.14546	1.76935	1.89688	2.67159	1.54763
ARHGAP9	0.136965	0	0.346036	0.366393	0.381818	0.176935	0	0	0.22109
ARHGDIA	151.483	159.671	157.1	122.741	130.009	120.581	122.823	118.886	118.504
ARHGDIB	3.01323	3.35076	1.38415	0.366393	0.763637	0.619272	0	0.296843	0.44218
ARHGEF1	30.6801	36.567	31.8353	32.9753	31.3091	31.229	38.886	31.1685	35.5955
ARHGEF10L	7.807	10.4893	8.99694	7.32785	6.3	8.05053	15.175	8.46003	10.1701
ARHGEF11	41.2264	38.898	37.718	47.2646	46.0091	44.5876	49.3189	47.4949	49.9664
ARHGEF12	442.808	418.408	416.974	348.989	368.646	365.99	334.799	342.705	361.04
ARHGEF17	110.257	119.316	114.884	69.065	63.3818	65.5543	55.0095	56.2518	59.9154
ARHGEF18	23.421	26.2234	23.5305	26.1971	19.4727	22.6477	25.1336	24.0443	24.7621
ARHGEF19	1.50661	3.78782	3.46036	2.38155	2.29091	2.47709	1.42266	3.85896	2.87417
ARHGEF2	55.7447	51.2812	43.9466	51.8445	56.3182	53.6997	44.1024	37.4022	42.6704
ARHGEF25	15.3401	13.5487	12.1113	11.9078	13.7455	11.5008	15.175	9.35055	13.2654
ARHGEF28	67.7976	62.6447	51.5594	50.1958	45.2455	52.992	33.1954	37.6991	36.9221
ARHGEF3	4.24591	4.51625	4.15244	8.79342	7.82728	7.8736	11.8555	10.6863	11.4967
ARHGEF33	1.23268	1.74822	1.73018	0.366393	0.190909	0.619272	0.47422	0	0.44218
ARHGEF35	0.684825	0.145685	0.346036	0	0.190909	0.35387	0	0.148422	0
ARHGEF37	1.09572	0.291371	1.03811	0	0.190909	0	0.47422	0	0
ARHGEF38	0.82179	1.0198	1.73018	0.183196	0.381818	0.442337	0	0.296843	0.884361
ARHGEF39	2.19144	1.31117	2.07622	2.74794	0.572728	2.03475	0.47422	0.742108	1.32654
ARHGEF4	2.05447	3.49645	2.42225	1.64877	0.381818	0.796207	1.42266	0.445265	0.44218
ARHGEF40	63.0039	63.8102	58.4801	66.1338	65.2909	61.7502	84.4111	72.2813	70.0856
ARHGEF5	0.27393	0.291371	0.692073	0.366393	0	0	0	0	0
ARHGEF6	9.86148	10.198	12.8033	17.5868	16.8	16.8973	25.1336	21.818	22.5512
ARHGEF7	62.8669	64.6843	62.6326	64.3019	65.4818	69.7123	73.5041	69.6097	68.759
ARHGEF9	13.4226	11.8005	11.7652	7.14465	8.59091	7.8736	7.1133	6.53055	6.85379
ARID1A	97.519	94.2584	108.655	74.9273	79.9909	72.4548	71.6072	59.0718	59.6943
ARID1B	72.4544	69.6376	65.7469	75.4769	74.4546	80.8592	76.8236	68.5707	81.8034
ARID2	45.3354	47.3477	47.407	42.3183	40.0909	38.041	36.5149	37.5506	41.1228
ARID3A	21.7774	18.065	21.1082	20.3348	19.8546	20.259	32.2469	21.6695	20.3403
ARID3B	2.19144	2.47665	3.11433	4.7631	4.00909	4.95417	4.26798	4.45265	3.75853
ARID4A	55.7447	50.2614	56.0579	46.715	44.8637	44.7645	48.3704	42.597	46.4289
ARID4B	110.394	114.363	120.767	107.17	118.173	118.546	116.184	103.598	109.661
ARID5A	11.642	14.5685	12.1113	14.4725	10.8818	11.2354	13.7524	15.8811	18.7927
ARID5B	349.398	354.161	349.843	292.748	317.1	300.789	151.75	148.273	152.552
ARIH1	126.693	125.726	115.576	124.94	133.636	130.047	119.978	124.08	125.8
ARIH2	89.849	87.7026	77.5121	83.5375	80.9455	85.371	82.9885	82.2255	75.8339
ARIH2OS	0.136965	0.145685	0.346036	0	0.572728	0.0884674	0.47422	0.148422	0
ARL1	232.566	233.242	261.257	217.454	212.482	217.011	239.481	250.832	236.788
ARL10	8.90272	12.5289	8.30487	10.8086	12.7909	11.7662	7.58752	9.20213	5.74834
ARL13A	0	0.291371	0	0.183196	0.190909	0	0.94844	0.445265	0
ARL13B	33.1455	37.1498	36.6799	20.518	20.0455	24.3285	15.6493	21.2243	15.2552
ARL14EP	50.5401	55.0691	61.9405	37.9216	40.2818	39.1026	29.8758	35.1759	39.7962
ARL15	19.0381	20.3959	16.9558	13.9229	17.7546	16.9857	17.0719	17.6622	18.3505
ARL16	18.2163	22.8726	19.378	17.4036	15.2727	16.8973	15.175	16.9201	17.9083
ARL17A	1.50661	1.16548	1.03811	1.83196	1.33636	1.23854	0	1.18737	1.10545
ARL2	14.9292	16.3168	16.9558	11.5414	8.78182	11.6777	13.2782	11.1316	11.0545
ARL2BP	131.623	128.349	130.456	128.787	120.082	123.324	103.854	87.7171	86.8884
ARL3	33.8303	35.8386	39.4481	31.8761	30.9273	32.9983	41.2571	43.3391	38.9119
ARL4A	3.28716	4.07919	2.76829	1.64877	1.14546	2.83096	3.79376	2.82001	2.65308
ARL4C	21.2296	19.0848	22.1463	27.113	31.1182	27.8672	63.0712	62.6339	63.4529
ARL4D	15.477	12.0919	14.1875	3.29753	2.67273	2.21168	4.26798	4.89791	4.64289
ARL5A	109.161	114.072	121.805	137.58	146.427	143.76	129.936	133.431	109.661
ARL5B	72.8653	72.8427	87.2012	120.177	123.9	130.224	181.152	214.914	215.121
ARL6	21.7774	20.2503	23.1844	21.2508	23.8636	22.7361	23.2368	28.3485	25.6465
ARL6IP1	170.247	178.465	171.98	128.237	125.427	122.173	119.503	118.737	122.484
ARL6IP4	39.172	43.2685	37.3719	30.2274	22.5273	28.3096	29.8758	25.0832	31.3948
ARL6IP5	262.014	263.253	277.867	174.769	169.718	180.739	298.758	307.975	300.462
ARL6IP6	58.8949	67.0153	70.5914	39.0208	40.2818	42.9067	38.886	38.2927	34.269
ARL8A	13.8335	11.6548	10.3811	16.6709	15.6546	16.7203	18.9688	18.4043	16.8029
ARL8B	171.48	175.551	151.564	274.245	292.282	290.527	306.82	322.52	301.567
ARLNC1	0	0.145685	0	0.183196	0.190909	0	0.47422	0.296843	0
ARMC1	84.0965	87.994	91.3536	64.8515	69.8728	61.9272	74.4525	64.5634	70.3067
ARMC10	2.7393	2.33097	2.42225	5.49589	6.87273	4.15797	6.16486	6.38212	9.28579
ARMC2	2.3284	2.03959	3.11433	0.732785	0.954546	2.12322	2.3711	1.78106	1.76872
ARMC4	19.3121	19.8132	16.6097	1.46557	1.33636	1.59241	0.47422	2.22632	0.884361
ARMC5	7.12218	8.44975	8.99694	8.79342	7.25455	6.63505	6.63908	7.5695	9.50688
ARMC6	19.9969	23.0183	20.0701	19.9684	23.6727	22.1168	17.5461	16.9201	19.4559
ARMC7	5.20467	6.70153	5.53658	3.11434	3.81818	3.5387	6.16486	4.60107	4.64289
ARMC8	45.7463	44.2883	48.7911	29.1282	34.1727	32.9099	33.1954	35.6212	39.7962
ARMC9	154.359	149.327	134.262	100.941	87.8182	98.1988	128.039	110.871	115.63
ARMCX1	58.0731	58.4198	58.8262	70.1642	67.7728	70.1546	71.6072	66.0476	63.674
ARMCX2	90.3969	90.6163	89.6234	80.7895	77.5091	76.1704	64.9681	61.0012	60.3576
ARMCX3	193.942	190.702	194.472	132.634	135.355	136.063	164.08	165.787	163.386
ARMCX4	31.9128	34.2361	35.6417	25.6475	22.9091	25.4786	26.0821	24.1927	24.541
ARMCX5	10.6833	11.3635	14.1875	8.42703	10.8818	9.64295	8.53596	9.79582	7.07488
ARMCX5.GPRASP2	2.46537	1.16548	3.11433	1.64877	1.33636	1.50395	0.94844	1.63264	1.32654
ARMCX6	4.79377	4.80762	4.49847	3.48073	5.91818	4.6003	5.69064	4.89791	2.65308
ARMH1	0.82179	0.291371	1.03811	0	0	0	0	0	0
ARMH3	27.53	25.6406	20.7622	28.7618	31.5	30.9636	36.5149	28.7938	22.109
ARMH4	1.64358	3.05939	2.07622	2.56475	2.48182	2.12322	1.89688	3.71054	3.75853
ARMT1	104.23	100.669	121.459	143.259	136.882	146.502	122.823	134.767	134.202
ARNT	50.4031	46.6193	45.3308	50.0126	48.1091	50.9572	56.4322	56.4002	51.2929
ARNT2	46.0202	48.8046	48.7911	24.5483	25.2	30.2558	23.711	23.4506	22.3301
ARNTL	14.9292	15.4426	14.8796	19.9684	16.8	17.0742	18.4946	21.3727	21.4457
ARNTL2	76.9743	87.994	88.9313	153.518	163.609	153.049	141.317	151.984	140.171
ARNTL2.AS1	0	0.291371	0.692073	0.915981	0.381818	0.0884674	0	0.148422	0
ARPC1A	91.2186	100.232	91.6996	126.039	133.064	134.293	190.636	201.408	189.695
ARPC1B	143.128	158.651	158.139	255.009	244.173	249.036	270.305	224.116	250.053
ARPC2	523.206	506.402	469.571	441.32	430.309	443.929	381.273	439.625	451.466
ARPC3	140.937	149.91	150.18	144.359	137.455	142.432	131.833	135.064	123.589
ARPC4	127.103	134.905	138.761	109.918	106.145	111.38	103.38	100.63	112.314
ARPC5	520.604	536.705	527.359	477.593	475.364	507.803	498.879	535.06	515.361
ARPC5L	39.8568	46.765	36.6799	75.4769	79.6091	76.4358	71.133	72.7265	70.7488
ARPIN	22.5992	26.0777	27.6829	11.5414	7.63637	9.46601	8.53596	7.86634	8.40143
ARPP19	298.584	298.509	319.045	318.395	314.427	311.671	282.635	310.943	296.482
ARR3	0.410895	0.145685	0.346036	0.549589	0	0	0.47422	0	0
ARRB1	7.12218	7.57564	8.30487	16.1213	21.9546	15.3933	18.0204	20.6306	26.0886
ARRB2	2.19144	3.64213	2.07622	2.38155	1.90909	2.12322	4.26798	1.78106	1.54763
ARRDC1	10.4093	8.59544	10.7271	10.9918	9.16364	9.02367	12.3297	12.0221	13.9287
ARRDC1.AS1	2.05447	3.35076	2.07622	1.83196	0.954546	1.41548	1.42266	0.890529	2.43199
ARRDC2	6.84825	8.74112	8.99694	9.52621	8.59091	7.69666	7.58752	6.82739	9.94906
ARRDC3	41.9113	41.0833	43.2545	16.3045	20.6182	18.6666	35.0923	44.0812	36.4799
ARRDC3.AS1	0.54786	0.874112	0	0.366393	0.572728	0.176935	0	0.445265	0.22109
ARRDC4	79.7136	85.2259	94.814	85.3695	90.6819	91.9176	69.7103	74.5076	76.7183
ARSA	21.9144	23.3097	23.5305	12.4573	12.4091	12.3854	16.5977	16.4748	19.0138
ARSB	51.9097	57.1087	55.3658	67.5994	72.3546	65.2005	112.864	109.683	94.8477
ARSD	10.4093	11.6548	12.1113	5.31269	5.72728	4.6003	6.63908	6.67897	6.6327
ARSE	1.78054	1.31117	1.73018	0.366393	1.52727	0.973141	0.94844	0.445265	0.44218
ARSG	6.30039	6.26447	6.22865	18.8692	19.0909	20.259	31.7727	27.1611	23.2145
ARSI	2.7393	2.76802	1.38415	3.84712	3.05455	4.42337	5.69064	3.85896	4.64289
ARSJ	95.8755	95.5696	109.347	96.178	94.1182	94.6601	108.596	105.082	104.797
ARSK	45.7463	49.533	49.8292	29.6778	35.3182	30.6097	37.4634	41.7064	37.5853
ART3	0.136965	0	0	0	0.190909	0.619272	0	0.148422	0
ART4	0.27393	0.582741	0	0.183196	0	0	0	0.148422	0.22109
ARTN	0.27393	0.145685	0.346036	0	0	0.0884674	0.47422	0.445265	0.66327
ARV1	25.2015	26.369	28.721	15.7549	16.6091	15.4818	21.3399	20.4822	16.5818
ARVCF	2.19144	4.22488	2.42225	0.915981	1.52727	1.50395	1.89688	4.1558	3.97962
AS.PTPRE	0	0	0	0.366393	0	0.265402	0.47422	0.148422	0
ASAH1	64.5105	71.9686	71.2835	45.2495	43.5273	43.7914	98.6377	87.5687	74.9496
ASAH2	0.27393	0.728427	0.346036	0	0.381818	0.35387	0	0.445265	0.44218
ASAH2B	6.43735	4.07919	4.15244	3.66393	2.86364	3.09636	4.7422	2.82001	2.87417
ASAP1	466.64	426.275	420.78	320.41	326.455	323.614	196.327	211.946	212.468
ASAP1.IT2	0.410895	0.874112	0.346036	0.549589	0.190909	0.619272	0	0.593686	0.44218
ASAP2	119.981	121.21	136.338	150.771	147.764	153.491	124.246	111.465	114.967
ASAP3	11.779	11.6548	10.3811	3.66393	2.29091	4.24643	4.7422	5.4916	6.41161
ASB1	68.0716	77.2132	70.9374	161.762	156.546	155.703	170.719	169.497	174.219
ASB13	3.83502	5.09899	3.46036	4.57991	1.71818	3.36176	3.31954	4.30422	3.97962
ASB14	0.958755	0.582741	1.03811	1.09918	0.572728	0.265402	0.47422	0.890529	0.884361
ASB16	0.54786	1.60254	0.692073	0.366393	0.190909	0.530804	1.42266	0.445265	1.10545
ASB16.AS1	4.38288	6.11878	3.11433	4.9463	3.43637	5.57345	6.16486	5.64002	9.0647
ASB3	7.53307	5.82741	10.0351	8.79342	8.4	9.02367	7.1133	12.0221	9.94906
ASB5	0.136965	0.145685	1.03811	0	0.190909	0.0884674	0	0.148422	0.22109
ASB6	25.7494	26.369	23.8765	26.7467	25.3909	26.0979	23.2368	21.5211	26.0886
ASB7	36.4327	30.0112	30.7972	32.4257	33.9818	28.0442	31.7727	25.0832	27.1941
ASB8	37.3914	37.1498	36.6799	24.9147	20.8091	22.7361	28.4532	24.0443	21.2247
ASB9P1	0.136965	0.291371	0	0.366393	0	0.0884674	0	0.296843	0
ASCC1	22.0514	23.164	16.9558	18.3196	17.7546	18.5782	14.7008	12.6158	12.6021
ASCC2	39.3089	36.7127	42.2164	24.7315	31.6909	26.6287	39.8345	33.5433	28.0784
ASCC3	504.853	484.695	485.489	247.498	248.564	251.867	199.172	220.554	208.93
ASF1A	35.7478	35.5472	31.8353	29.3114	36.0818	32.556	18.0204	27.458	27.1941
ASF1B	6.02646	9.17818	8.65091	2.74794	2.1	2.47709	0.47422	0.296843	0.884361
ASGR1	0.136965	0.291371	0.346036	0.732785	0.954546	0.707739	0.94844	0.296843	0.44218
ASH1L	183.259	173.366	159.869	166.342	169.146	161.807	138.946	146.047	142.161
ASH1L.AS1	0.958755	0.874112	0.692073	0.549589	0.572728	0.707739	0	0.890529	0.884361
ASH2L	34.3782	35.2559	33.9116	19.7852	24.4364	24.5939	21.3399	23.8959	24.0988
ASIC1	1.91751	1.31117	2.76829	1.09918	1.52727	1.41548	0.94844	2.22632	3.31635
ASIC3	0.27393	0.291371	0.692073	0.915981	0.763637	0.796207	0	0.445265	0.44218
ASL	19.449	19.5218	23.1844	20.518	19.8546	18.8436	13.7524	10.9832	12.6021
ASNA1	36.9805	36.13	40.1402	37.7384	38.7546	38.8372	39.8345	40.9643	35.1533
ASNS	1.09572	0.874112	0	0.366393	1.14546	0.442337	0	0.296843	0.44218
ASNSD1	56.7035	56.6716	57.096	43.2343	47.1546	48.9225	42.6798	45.5654	51.0718
ASPH	1473.74	1454.96	1527.06	1156.33	1176.38	1201.92	1227.28	1243.77	1209.14
ASPHD1	6.02646	4.37056	3.46036	9.8926	10.3091	9.20061	17.0719	10.8348	13.0443
ASPHD2	1.64358	1.0198	0.692073	2.56475	0.954546	1.06161	1.42266	1.78106	1.76872
ASPM	172.302	173.074	191.012	40.3032	37.0364	45.0299	3.79376	3.71054	4.4218
ASPN	10.2724	13.8401	10.3811	3.11434	1.33636	2.47709	1.42266	1.03895	1.32654
ASPSCR1	6.98521	8.74112	10.3811	8.61022	6.49091	6.36965	7.1133	6.53055	8.18034
ASS1	30.1323	31.1767	29.4131	66.317	58.8	64.4043	66.865	52.3928	49.082
ASTE1	7.25914	7.28427	6.22865	5.67908	4.00909	4.95417	3.31954	3.85896	3.75853
ASTN2	2.7393	3.78782	2.76829	1.46557	1.14546	0.884674	1.89688	2.52317	3.09526
ASXL1	77.6591	79.2528	71.9756	66.6834	66.8182	66.0851	58.329	53.4317	65.0005
ASXL2	103.545	100.96	100.004	172.204	185.373	177.908	152.225	168.904	162.059
ATAD1	102.724	101.98	108.309	83.1711	92.2091	92.36	81.0916	91.1308	84.2353
ATAD2	96.0124	101.834	114.538	67.5994	64.7182	67.5006	37.9376	37.6991	34.9322
ATAD2B	22.4622	20.9787	24.9146	16.8541	19.0909	16.278	15.6493	12.4674	17.0239
ATAD3A	17.5315	20.9787	18.3399	14.6557	14.1273	16.0126	10.4328	10.6863	15.4763
ATAD3B	15.8879	18.3564	18.3399	17.5868	16.4182	14.4202	16.5977	12.9127	17.4661
ATAD3C	0	0	0.346036	0	0.381818	0	0.47422	0.296843	0
ATAD5	15.3401	16.0254	18.686	7.32785	7.44546	6.36965	6.63908	6.2337	5.74834
ATE1	59.4428	56.2345	50.8673	73.6449	81.1364	81.9208	72.0814	81.335	67.8747
ATE1.AS1	0.958755	0.874112	0.346036	0.549589	0.381818	0.707739	0.47422	0.296843	0.44218
ATF1	61.6342	63.6645	70.2454	61.7371	62.2364	69.4469	56.9064	61.4465	57.2623
ATF2	117.516	112.469	121.459	115.963	120.082	118.281	113.813	103.895	102.144
ATF3	1.50661	2.62234	1.73018	4.39671	5.72728	3.8041	1.89688	1.78106	3.09526
ATF4	84.0965	91.7818	75.0899	73.8281	81.1364	84.9287	67.3392	62.0402	76.055
ATF5	18.3533	20.9787	20.0701	19.602	14.5091	14.6856	18.0204	16.9201	18.1294
ATF6	110.257	111.741	120.421	73.6449	62.6182	76.1704	50.7415	54.916	44.218
ATF6B	0.136965	0	0.346036	0.366393	0.190909	0	0.94844	0	0.22109
ATF7	34.1043	30.0112	30.7972	34.2577	35.7	35.5639	43.154	39.3317	34.7112
ATF7IP	88.4793	87.2655	83.3948	77.1256	69.3	66.8813	77.772	71.836	61.9052
ATF7IP2	1.36965	1.31117	2.07622	0.549589	0.572728	0.973141	1.42266	0.742108	1.32654
ATG10	3.83502	3.78782	3.8064	2.01516	1.33636	2.83096	3.31954	1.92948	4.86398
ATG101	21.9144	23.4553	21.1082	32.9753	31.5	26.8056	31.2985	29.0906	33.1635
ATG12	115.872	115.383	132.186	142.16	154.636	147.917	154.596	165.193	162.943
ATG13	82.8638	84.0604	69.5533	107.353	108.818	105.188	90.1018	82.2255	93.5211
ATG14	46.0202	49.6787	42.5625	46.715	46.7727	52.992	43.6282	48.6823	48.4187
ATG16L1	26.1603	26.0777	24.9146	29.1282	32.2637	28.8404	39.3602	36.3633	33.3846
ATG16L2	4.10895	5.68173	5.53658	6.22867	6.68182	5.04264	6.16486	7.71792	10.3912
ATG2A	21.7774	19.5218	24.5686	47.2646	49.2546	45.8261	57.3806	54.7675	57.0413
ATG2B	98.0669	95.5696	101.735	115.597	112.255	111.38	118.555	119.925	116.515
ATG3	65.0583	64.9757	69.2073	61.0044	55.5546	63.9619	54.5353	60.2591	51.9562
ATG4A	22.4622	21.7071	19.7241	16.1213	13.3636	14.6856	14.2266	13.5064	15.2552
ATG4B	34.7891	36.8584	37.3719	35.9065	38.9455	34.6792	49.7931	37.6991	40.9017
ATG4C	12.1899	15.4426	14.8796	12.4573	11.8364	12.4739	11.8555	11.4285	14.3709
ATG4D	4.24591	3.9335	4.84451	3.66393	3.43637	3.71563	6.63908	3.56212	5.08507
ATG5	63.8257	60.1681	57.096	56.2412	50.9727	54.4074	63.0712	62.337	54.1671
ATG7	33.5564	26.0777	25.2607	65.5843	65.4818	60.954	59.2775	52.0959	55.2725
ATG9A	57.6622	59.1483	53.9817	52.3941	49.0637	46.0915	61.6486	48.9791	59.4732
ATG9B	0.27393	0.437056	0	0.183196	0	0.0884674	0	0.148422	0.22109
ATIC	76.0155	76.4848	76.8201	83.1711	84.5728	87.5827	59.2775	68.7192	76.2761
ATL1	20.8187	22.5812	24.9146	37.372	44.2909	40.9604	46.4735	42.597	39.133
ATL2	53.0054	43.997	52.9436	51.4781	50.9727	57.8577	45.0509	59.8139	58.5889
ATL3	352.411	340.321	369.913	299.526	292.282	286.104	384.592	391.239	342.911
ATM	217.5	217.217	235.651	281.573	267.846	284.6	318.201	312.724	310.632
ATMIN	97.3821	91.6361	91.6996	96.178	100.991	97.1372	86.308	85.9361	86.2252
ATN1	120.118	121.939	119.036	104.239	109.009	91.8292	99.5861	81.0381	85.1197
ATOH8	11.9159	9.61523	6.22865	1.09918	0.190909	0.265402	1.89688	0.148422	0
ATOX1	41.2264	37.4411	37.718	36.8224	41.6182	35.387	39.8345	41.4096	41.1228
ATP10A	21.5035	21.2701	20.4161	1.28237	1.90909	1.94628	0.94844	1.63264	0.44218
ATP10D	184.218	177.59	166.79	62.6531	65.4818	60.7771	82.9885	93.2087	77.1605
ATP11A	22.1883	23.8924	30.1052	27.8458	28.4455	24.417	34.618	38.738	39.133
ATP11B	154.907	151.513	166.097	185.211	174.109	193.39	175.936	199.924	184.831
ATP11C	130.254	121.793	130.456	99.2924	103.282	95.9871	81.5658	86.2329	91.7524
ATP13A1	42.0482	47.3477	46.0228	45.4327	38.3727	35.9178	35.0923	38.4412	45.9867
ATP13A2	17.2576	20.2503	21.1082	19.602	18.3273	16.0126	31.7727	22.5601	32.0581
ATP13A3	741.802	711.964	750.207	1992.99	2077.47	2026.88	1550.7	1605.33	1538.79
ATP1A1	208.05	189.537	177.171	242.552	239.209	223.822	245.172	238.81	239.441
ATP1A1.AS1	0.684825	1.45685	1.38415	0.366393	0.190909	0.0884674	0	0.742108	0.66327
ATP1B1	21.7774	22.8726	21.8003	7.69424	7.82728	8.58134	12.3297	9.94424	9.72797
ATP1B2	0	0.145685	0	0.183196	0.190909	0.176935	0	0.148422	0.22109
ATP1B3	260.37	270.246	262.642	335.432	316.909	312.821	349.5	336.62	355.513
ATP2A1	0.684825	0.582741	0.692073	0.366393	0.763637	0.619272	0.47422	0.296843	0.884361
ATP2A1.AS1	0.27393	0.291371	0	0.366393	0	0.0884674	0.47422	0	0
ATP2A2	728.243	688.946	667.85	785.179	836.373	789.218	613.166	618.918	617.505
ATP2A3	0.82179	0.582741	1.03811	10.8086	7.25455	8.4044	33.6696	27.9032	38.2486
ATP2B1	462.257	423.799	437.39	862.854	863.673	890.159	812.813	819.732	785.975
ATP2B1.AS1	6.02646	4.9533	3.46036	8.42703	6.87273	7.16586	4.7422	8.3116	7.73815
ATP2B4	1483.33	1419.7	1393.83	836.108	852.409	807.442	715.123	732.905	727.387
ATP2C1	395.144	386.795	385.484	309.785	317.1	314.679	272.202	286.305	260.444
ATP2C2	1.64358	1.16548	1.73018	1.28237	0.190909	0.619272	1.42266	1.18737	0.66327
ATP2C2.AS1	0.958755	1.74822	1.38415	0.366393	1.33636	0.973141	0.94844	0.742108	0.884361
ATP5F1A	377.749	384.755	384.1	326.089	325.309	322.906	312.985	317.622	299.798
ATP5F1B	380.626	388.834	364.722	383.063	372.846	373.155	359.933	359.328	356.618
ATP5F1C	154.086	158.797	136.684	132.268	127.718	127.747	101.483	110.871	109.882
ATP5F1D	20.4078	24.0381	29.0671	21.8004	19.2818	19.0205	20.8657	17.6622	20.1192
ATP5F1E	24.2428	27.3888	26.6448	25.4643	27.1091	26.7172	31.7727	29.8327	27.4152
ATP5IF1	79.7136	79.1071	94.4679	51.6613	60.5182	64.3158	68.7619	64.8602	69.2012
ATP5MC1	28.6257	27.8259	22.8384	17.77	19.6636	17.605	20.8657	18.998	21.6668
ATP5MC2	67.5237	72.8427	62.2865	49.2798	54.7909	51.8419	40.3087	44.2296	45.7657
ATP5MC3	191.751	200.754	202.431	189.975	193.2	187.462	205.337	203.189	192.57
ATP5MD	76.7004	90.9077	73.3597	80.0568	80.7546	83.8671	72.0814	79.2571	80.0346
ATP5ME	39.3089	38.7523	29.4131	33.5249	29.0182	35.5639	46.9478	44.0812	42.2282
ATP5MF	45.7463	46.4736	38.41	38.4712	33.7909	35.5639	38.886	34.7306	36.9221
ATP5MG	95.7385	107.079	85.817	99.4756	89.3455	93.5985	116.184	108.051	110.987
ATP5MGL	1.23268	1.74822	2.07622	1.09918	1.52727	1.32701	0.47422	1.63264	1.32654
ATP5MPL	51.3618	54.195	50.5213	42.3183	47.5364	47.7724	46.4735	54.0254	49.9664
ATP5PB	116.557	123.687	109.694	92.1477	91.2546	99.2604	80.6174	83.7097	92.1946
ATP5PD	77.1113	76.1934	73.3597	75.4769	66.6273	81.0361	82.5142	88.9045	83.7932
ATP5PF	96.8342	101.251	96.8902	90.3158	90.3	91.1214	94.844	93.2087	93.3
ATP5PO	74.235	74.8823	68.5152	58.806	66.4364	68.7392	61.6486	59.517	68.3169
ATP5S	8.2179	9.9066	11.7652	6.04548	6.3	7.07739	8.06174	4.45265	4.86398
ATP6AP1	85.877	88.431	76.128	85.5526	80.9455	78.3821	116.184	102.411	99.4906
ATP6AP1L	2.05447	1.89391	0.346036	0.183196	0.954546	0.707739	1.42266	0.593686	0.44218
ATP6AP2	228.458	236.302	235.651	275.161	273.955	284.865	333.851	358.29	335.173
ATP6V0A1	35.8848	33.6533	38.064	62.2867	65.1	71.8355	91.5244	89.6466	92.6368
ATP6V0A2	32.4607	35.4015	37.3719	45.4327	36.2727	41.3143	35.5665	41.2612	35.5955
ATP6V0B	62.319	63.2274	75.782	123.657	117.409	104.038	146.06	131.205	133.76
ATP6V0C	144.087	135.633	148.796	191.623	185.755	163.93	221.935	214.617	228.386
ATP6V0CP3	0.27393	0.145685	0.346036	0	0.381818	0.176935	0	0	0.22109
ATP6V0D1	75.3307	79.1071	73.7057	112.482	110.346	106.072	138.946	126.9	118.725
ATP6V0E1	240.236	231.348	217.657	275.161	240.355	244.612	237.11	226.194	224.849
ATP6V0E2	7.25914	9.32386	9.68902	1.28237	3.24546	2.30015	0.94844	2.96843	1.54763
ATP6V0E2.AS1	0.82179	0.728427	0.346036	0.183196	0	0.0884674	0	0.296843	0.22109
ATP6V1A	192.162	177.299	186.514	169.823	175.446	157.207	204.389	192.206	200.087
ATP6V1B1	0.410895	0.291371	0.346036	0	0.190909	0.265402	0.47422	0.593686	0.44218
ATP6V1B1.AS1	0.27393	0	0	0.549589	0.190909	0.176935	0	0.593686	0
ATP6V1B2	66.291	67.3066	55.7118	101.124	109.391	106.249	144.163	147.679	145.256
ATP6V1C1	126.556	121.502	123.535	288.168	274.909	300.789	302.078	303.67	277.689
ATP6V1C2	0.958755	0.874112	1.03811	1.64877	1.71818	1.68088	1.42266	1.18737	1.10545
ATP6V1D	125.186	126.164	116.96	135.565	140.127	145.352	143.689	159.108	157.637
ATP6V1E1	69.9891	77.6503	79.9344	129.886	124.473	122.704	144.637	140.407	145.919
ATP6V1E2	2.7393	1.89391	1.73018	2.56475	2.29091	2.21168	2.3711	1.63264	2.43199
ATP6V1F	51.0879	53.4665	43.6006	90.4989	75.0273	80.063	109.071	107.457	116.515
ATP6V1FNB	0.410895	0.145685	0	0.549589	0.381818	0.530804	1.89688	0.296843	1.54763
ATP6V1G1	125.46	129.514	137.722	248.597	237.491	239.57	292.594	316.88	298.914
ATP6V1H	91.2186	96.298	87.2012	133.367	128.864	131.109	132.782	127.642	128.453
ATP7A	58.758	55.7975	60.9024	87.0182	95.6455	90.856	110.019	106.567	96.6164
ATP7B	4.24591	4.22488	4.84451	2.19836	3.43637	2.47709	2.3711	2.67159	1.76872
ATP8A1	0.958755	0.728427	0.692073	1.09918	0.190909	0.973141	2.3711	2.67159	2.65308
ATP8B1	380.078	392.331	428.047	45.0663	41.0455	40.6065	12.8039	14.3969	13.0443
ATP8B2	164.769	170.16	182.361	138.496	147.955	142.609	180.678	176.473	186.6
ATP8B3	1.78054	1.60254	2.76829	1.09918	0.381818	0.707739	0	0.593686	0.66327
ATP8B4	0.82179	0.291371	0.692073	0.183196	0.190909	0.442337	0.47422	0.148422	0.66327
ATP8B5P	1.36965	1.60254	2.42225	0.915981	2.48182	2.38862	1.42266	1.78106	0.884361
ATP9A	66.291	72.697	67.8231	52.3941	54.9818	55.646	68.7619	52.8381	54.6093
ATP9B	10.9572	11.3635	11.4192	9.8926	10.1182	9.46601	14.2266	7.27265	9.50688
ATPAF1	41.7743	43.4142	36.6799	20.1516	26.9182	23.4439	24.6594	15.7327	21.4457
ATPAF2	7.25914	9.32386	8.99694	9.7094	7.06364	8.05053	12.8039	9.20213	11.4967
ATR	90.9447	89.1594	98.2743	73.2785	90.1091	91.6522	71.6072	68.8676	64.3372
ATRAID	57.9362	58.1285	60.2103	41.4024	40.2818	44.676	37.4634	40.2222	37.1431
ATRN	125.46	128.786	130.11	128.604	127.718	128.897	136.101	116.659	110.766
ATRNL1	0.410895	0.145685	0.346036	0	0	0	0	0.148422	0.22109
ATRX	350.356	349.062	367.145	312.166	306.791	315.121	282.635	281.11	290.955
ATXN1	92.1774	93.0929	93.7758	29.6778	26.9182	34.3253	29.8758	33.6917	28.5206
ATXN10	188.19	205.853	189.282	130.436	135.164	132.347	153.173	167.123	151.668
ATXN1L	42.7331	45.0168	42.2164	36.8224	40.8546	31.5829	42.6798	35.3243	29.405
ATXN2	106.285	95.5696	88.5853	86.835	83.0455	84.4864	82.04	75.3981	74.7285
ATXN2L	81.2202	75.028	68.1692	92.3309	98.7	88.3789	75.8752	67.6802	82.2455
ATXN3	31.365	30.8853	33.2195	43.6007	43.3364	45.3838	44.5767	49.7212	47.0922
ATXN7	50.1292	55.2147	51.9054	45.6159	49.8273	50.161	53.5868	52.9865	46.65
ATXN7L1	11.3681	12.8203	11.7652	5.67908	5.15455	3.45023	3.79376	5.04633	5.08507
ATXN7L2	8.49183	9.46955	5.88262	3.11434	3.24546	3.36176	3.31954	2.67159	3.31635
ATXN7L3	42.7331	47.2021	44.9847	55.3253	59.3728	50.3379	64.4939	54.916	52.6195
ATXN7L3B	93.821	97.7549	97.5822	85.5526	81.5182	82.4516	82.04	83.2645	90.647
AUH	10.6833	11.6548	11.4192	13.7397	10.6909	15.0395	11.3813	11.7253	10.1701
AUNIP	2.3284	2.33097	2.42225	1.64877	0.954546	1.59241	0.47422	0.296843	0
AUP1	44.3766	45.4538	37.3719	48.547	56.8909	54.4959	50.7415	52.6896	48.6398
AURKA	58.758	67.7437	67.8231	46.5318	44.2909	47.1531	25.6079	18.4043	18.5716
AURKAIP1	33.8303	36.2757	37.0259	32.2425	33.2182	33.4407	41.2571	36.8085	39.7962
AURKAP1	1.91751	0.291371	1.73018	1.83196	1.90909	1.15008	0	1.03895	0.44218
AURKB	9.31362	8.30407	10.3811	1.09918	2.29091	2.21168	0.94844	0.593686	0.66327
AURKC	0.27393	0.437056	0.346036	0	0.763637	0.265402	0.94844	0.445265	0.66327
AUTS2	0	0	0	0.366393	0.381818	0.884674	0.47422	0.445265	1.54763
AVEN	31.091	31.7594	28.721	22.1667	22.9091	25.0363	28.4532	24.3411	24.541
AVIL	1.64358	1.60254	1.03811	0.732785	0.763637	1.15008	0.94844	0.742108	0.44218
AVL9	78.3439	75.1736	79.9344	116.146	115.118	119.696	124.72	127.939	119.389
AVPI1	9.86148	10.4893	10.7271	7.14465	5.91818	6.90046	6.63908	6.08528	5.96943
AXDND1	1.50661	1.16548	0.346036	1.46557	1.52727	1.41548	2.84532	0.890529	1.54763
AXIN1	15.614	18.9391	13.4954	21.6172	19.2818	19.8167	17.5461	19.4432	22.7723
AXIN2	0.684825	1.31117	1.03811	0.915981	0.572728	0.884674	0.47422	1.33579	0.884361
AXL	647.981	671.901	673.733	260.139	252.191	253.901	156.493	158.217	170.682
AZI2	104.367	107.953	112.808	108.086	100.418	111.027	76.8236	71.5392	69.8645
AZIN1	335.975	328.958	323.198	152.236	154.255	156.41	114.761	118.886	106.123
AZIN1.AS1	0.136965	0.437056	0.346036	0	0.190909	0.35387	0	0	0.22109
AZIN2	0.958755	1.74822	1.03811	1.46557	1.52727	1.94628	2.84532	0.593686	1.98981
B2M	44.5136	52.1554	48.099	43.4175	43.9091	42.9067	33.1954	35.4727	31.6159
B3GALNT1	12.1899	13.6944	13.4954	3.29753	2.29091	3.18483	2.3711	0.890529	1.10545
B3GALNT2	68.8934	63.6645	71.2835	50.9286	53.0727	53.5228	46.9478	45.8622	46.4289
B3GALT1	0	0.291371	0	0.366393	0	0.0884674	0.94844	1.18737	1.54763
B3GALT2	3.15019	3.20508	4.84451	0.183196	0.190909	0.0884674	0.47422	0.148422	0
B3GALT6	28.3517	30.8853	29.0671	28.5786	29.9727	28.7519	30.8243	27.6064	34.7112
B3GAT3	14.9292	16.7538	13.4954	18.5028	14.7	16.8088	23.711	20.9274	25.4254
B3GLCT	26.4342	29.1371	27.6829	13.0069	13.9364	13.624	8.53596	13.3579	12.381
B3GNT10	3.56109	4.9533	6.22865	3.84712	2.86364	4.15797	4.7422	3.85896	3.53744
B3GNT2	34.1043	25.4949	30.1052	40.12	39.3273	42.8182	58.8032	55.8065	50.4086
B3GNT4	0.27393	0.291371	0.346036	0.183196	0	0.176935	0	0.296843	0.22109
B3GNT5	3.15019	3.05939	2.42225	10.6254	7.82728	7.34279	19.443	20.3337	18.7927
B3GNT8	0.958755	0.291371	0.346036	0.549589	0.381818	1.23854	0	0.593686	1.32654
B3GNT9	22.1883	20.6873	19.7241	17.77	17.5636	14.7741	18.0204	15.2874	13.4865
B3GNTL1	0.54786	0.437056	0.346036	0.549589	1.14546	0.442337	1.42266	1.48422	1.10545
B4GALNT1	4.51984	5.24467	4.15244	1.46557	1.71818	1.41548	6.63908	4.60107	5.30616
B4GALNT4	1.64358	1.45685	3.46036	1.83196	1.90909	1.15008	1.42266	0.742108	2.2109
B4GALT1	233.388	231.057	223.539	239.437	232.336	238.154	306.346	305.303	290.07
B4GALT1.AS1	1.50661	1.16548	1.03811	1.46557	1.14546	0.884674	3.79376	2.52317	2.87417
B4GALT2	45.8833	43.8513	32.8735	26.1971	21.3818	20.7014	20.3914	21.0759	22.3301
B4GALT3	21.2296	20.5416	19.032	30.2274	30.5455	29.1058	25.6079	32.6527	28.9628
B4GALT4	46.979	43.7056	48.4451	18.5028	20.6182	19.109	20.8657	22.4116	15.2552
B4GALT5	83.6856	84.3518	77.5121	82.9879	78.6546	81.7439	95.3182	87.5687	90.2048
B4GALT6	0	0.145685	0.346036	0	0.381818	0	0.47422	0	0.22109
B4GALT7	18.2163	15.4426	16.6097	14.2893	13.9364	14.6856	20.3914	17.959	17.9083
B4GAT1	19.449	23.164	21.8003	15.3885	14.5091	17.8704	25.1336	17.0685	21.6668
B9D1	7.67004	8.01269	13.4954	5.31269	4.77273	5.92732	7.1133	3.56212	5.52725
B9D2	1.50661	2.33097	1.73018	2.38155	2.29091	1.41548	1.89688	3.56212	1.98981
BAALC	7.12218	8.01269	9.34298	32.7921	43.5273	38.041	38.886	38.1443	35.3744
BABAM1	37.2545	34.5274	30.4512	25.4643	29.7818	26.1863	28.4532	26.2706	30.5104
BABAM2	19.3121	15.734	16.9558	8.42703	8.4	8.6698	3.79376	6.97581	7.07488
BACE1	122.858	125.435	109.001	50.7454	53.0727	50.161	49.7931	49.7212	52.8405
BACE1.AS	0.82179	0.437056	0.346036	0.183196	1.52727	0.442337	0.47422	0.445265	0.22109
BACE2	0.54786	0.291371	0.692073	0	0.381818	0.176935	0.47422	1.03895	0.44218
BACH1	155.318	145.831	134.608	264.169	272.046	259.033	216.244	241.482	208.267
BACH2	0	0	0.346036	0.732785	0.572728	0.35387	0.47422	0	0.44218
BAD	22.4622	21.1244	20.0701	16.3045	17.9455	16.1011	22.7625	22.8569	17.9083
BAG1	13.8335	10.635	10.0351	13.7397	16.4182	16.3665	18.9688	22.2632	19.0138
BAG2	213.802	212.701	243.264	108.635	98.7	103.153	54.5353	72.5781	65.6638
BAG3	70.9478	71.5315	71.6295	62.2867	55.5546	54.4074	62.1228	59.3686	63.2318
BAG4	79.8506	76.3391	84.4329	73.6449	75.4091	74.0472	74.4525	76.7339	68.5379
BAG5	69.3043	70.5117	62.9786	70.1642	67.0091	65.9082	64.0197	65.7507	60.1365
BAHCC1	10.8202	9.76092	19.7241	9.52621	8.01819	6.90046	7.58752	6.2337	6.85379
BAHD1	26.2973	28.1173	26.2988	19.4188	16.6091	21.9399	18.0204	22.8569	26.973
BAIAP2	15.2031	17.4822	15.9177	23.0827	19.8546	16.1011	22.2883	23.0053	26.5308
BAIAP2.DT	11.9159	12.3833	9.68902	9.8926	8.01819	8.139	13.2782	12.0221	12.6021
BAIAP2L1	9.99844	11.5091	8.99694	5.1295	3.43637	5.57345	3.79376	2.82001	3.09526
BAIAP2L2	0	0.437056	0	0.915981	0	0.0884674	0	0.593686	0.66327
BAIAP3	0.27393	0.728427	0.692073	0.183196	0.381818	0	0	0.148422	0
BAK1	7.53307	9.9066	7.26676	9.7094	8.59091	8.58134	16.1235	12.4674	9.50688
BAMBI	4.65681	4.22488	5.88262	0	0.381818	0.442337	0	0.742108	0.66327
BANF1	32.3237	29.5741	35.6417	27.4794	24.6273	25.3901	26.0821	23.599	26.973
BANP	9.72451	10.3437	8.99694	8.06064	11.6455	9.20061	13.7524	10.0927	12.8232
BAP1	38.4871	37.2955	41.5244	30.4106	35.3182	34.5023	31.7727	30.7233	29.405
BARD1	27.1191	29.5741	29.4131	3.48073	5.53637	6.10425	6.16486	3.26527	2.65308
BASP1	116.146	111.449	111.77	203.348	198.546	193.213	138.946	147.086	161.838
BASP1.AS1	0	0	0.346036	0	0.190909	0.176935	0.47422	0	0.44218
BATF2	0.27393	0.437056	1.03811	0	1.52727	0.176935	1.42266	1.78106	0.44218
BATF3	1.09572	1.74822	1.38415	0.915981	0.763637	1.68088	0	0.890529	0.66327
BAX	43.144	40.3548	39.1021	27.6626	29.2091	26.5402	24.1852	20.4822	20.1192
BAZ1A	156.414	146.122	133.57	161.03	144.327	151.368	128.988	117.995	119.168
BAZ1B	142.717	136.653	137.722	144.542	162.082	155.172	156.018	138.774	141.94
BAZ2A	103.545	95.2782	93.7758	121.093	121.991	112.088	118.555	106.567	108.997
BAZ2B	45.4724	46.4736	51.5594	60.0884	57.8455	54.4959	60.7001	52.2444	46.2078
BBC3	6.02646	8.44975	7.95884	3.29753	3.43637	4.42337	2.84532	3.85896	4.64289
BBIP1	18.4903	15.0056	16.6097	19.602	16.8	19.5513	20.3914	20.9274	20.3403
BBOF1	9.03969	9.46955	8.65091	2.74794	3.81818	3.5387	2.3711	2.0779	3.09526
BBS1	22.1883	18.6477	19.7241	7.87744	9.92728	7.43126	8.53596	5.19475	7.29597
BBS10	45.3354	47.6391	57.442	48.7302	57.8455	52.4612	54.5353	54.6191	49.082
BBS12	8.08093	7.72132	7.6128	12.8237	14.8909	13.3586	13.2782	10.3895	9.94906
BBS2	41.9113	41.666	42.9085	70.7138	62.4273	68.0314	76.3494	74.2108	64.3372
BBS4	21.9144	20.5416	27.3369	13.9229	16.0364	17.605	20.8657	15.139	17.0239
BBS5	9.72451	9.61523	11.7652	6.41187	6.10909	5.92732	6.16486	3.11685	3.31635
BBS7	52.0467	48.5132	55.0198	33.8913	29.7818	34.8562	35.0923	39.4801	37.3642
BBS9	15.751	17.3366	15.9177	16.6709	16.9909	14.5971	18.4946	21.2243	15.6974
BBX	227.499	219.548	231.498	173.12	172.391	168.177	185.42	188.05	187.927
BCAM	1.64358	2.76802	3.11433	0.183196	0.381818	0.265402	1.42266	0.148422	0.44218
BCAN	0	0	0	0.183196	0	0.0884674	0.47422	0.148422	0.44218
BCAP29	223.801	231.785	245.34	451.945	447.109	472.239	387.912	412.167	386.908
BCAP31	79.3027	81.8752	77.5121	104.788	98.5091	93.0677	97.215	98.8487	99.9327
BCAR1	85.877	83.4777	96.8902	69.981	66.8182	57.5923	53.1126	38.5896	45.1024
BCAR3	84.0965	86.2457	98.2743	75.4769	74.2637	70.6854	73.5041	79.5539	75.8339
BCAS2	42.1852	42.3944	34.6036	44.5167	39.3273	46.7108	45.9993	40.2222	42.4493
BCAS3	13.6965	12.0919	11.7652	9.8926	10.3091	9.90835	13.7524	10.8348	11.2756
BCAS4	10.2724	10.7807	11.0732	12.4573	12.4091	11.8546	9.95861	11.4285	8.84361
BCAT1	347.754	338.573	371.643	183.013	177.736	206.306	218.615	220.109	211.141
BCAT2	14.1074	15.5883	14.5335	12.8237	15.0818	14.8625	11.8555	11.1316	9.50688
BCCIP	63.4148	74.0082	65.7469	63.0195	71.7818	64.9351	59.7517	57.5875	55.4936
BCDIN3D	3.15019	3.35076	2.76829	2.74794	2.48182	2.38862	3.31954	3.41369	4.20071
BCDIN3D.AS1	0.958755	1.16548	0.692073	0.732785	0	0.0884674	0	0.890529	0.22109
BCKDHA	8.2179	12.6746	10.0351	11.175	11.6455	11.7662	13.7524	7.71792	9.0647
BCKDHB	35.8848	38.0239	37.0259	11.3582	10.8818	11.5892	9.4844	8.90529	9.0647
BCKDK	47.6638	46.3279	37.0259	51.295	46.7727	46.5338	37.9376	42.3001	43.5548
BCL10	72.5914	70.9488	74.0518	121.093	128.673	132.878	174.039	159.998	157.195
BCL11A	1.50661	1.31117	1.38415	0.366393	0	0.176935	0.47422	0.296843	0.22109
BCL11B	0	0	0	0.549589	0.190909	0.176935	0.47422	0.742108	0.44218
BCL2	2.7393	2.62234	2.76829	2.56475	1.90909	2.21168	1.89688	2.82001	0.66327
BCL2A1	0.27393	0.291371	0.346036	18.5028	15.8455	17.6935	6.63908	5.4916	6.19052
BCL2L1	48.8965	54.195	53.2896	47.2646	48.1091	46.6223	61.6486	62.337	62.7896
BCL2L10	0.410895	0.291371	0.346036	0.183196	0.190909	0.176935	0.47422	0.296843	0.22109
BCL2L11	1.91751	3.20508	3.11433	1.64877	3.05455	2.65402	4.7422	4.74949	5.30616
BCL2L12	7.25914	7.72132	9.34298	5.49589	7.82728	6.01578	7.58752	5.19475	8.62252
BCL2L13	88.8902	90.4706	100.697	91.5981	100.991	97.1372	103.38	95.7319	103.028
BCL2L15	0.27393	0.291371	0.346036	0.366393	0.381818	0.265402	0	0.296843	0
BCL2L2	65.0583	77.6503	70.5914	68.5154	68.9182	75.3742	59.2775	55.9549	64.3372
BCL3	10.5463	8.88681	10.7271	6.96146	8.97273	7.43126	8.06174	7.42108	9.50688
BCL6	35.063	33.6533	37.718	29.861	39.7091	32.556	29.4016	22.2632	22.7723
BCL7A	6.30039	5.53604	5.19054	6.59507	9.35455	9.55448	6.63908	7.71792	9.0647
BCL7B	41.0895	35.1102	39.7942	34.6241	41.4273	36.0947	28.4532	37.5506	37.5853
BCL7C	11.9159	13.2574	7.26676	11.3582	10.1182	9.55448	9.01018	8.75687	7.95925
BCL9	13.4226	13.2574	12.1113	8.61022	10.3091	10.3507	12.8039	9.20213	10.6123
BCL9L	85.4661	81.1467	85.1249	64.8515	63.7637	63.5196	82.5142	65.7507	75.8339
BCLAF1	231.608	236.884	245.34	196.57	204.846	209.668	200.121	205.712	209.593
BCLAF3	28.2148	28.8457	25.2607	16.6709	17.3727	17.0742	15.6493	18.4043	15.0341
BCO2	0.684825	0.728427	1.73018	0.183196	0.763637	0.442337	0	0.148422	0.22109
BCOR	22.7362	21.7071	20.0701	26.0139	23.4818	22.8246	23.2368	21.0759	25.8675
BCORL1	10.9572	9.46955	12.1113	12.8237	14.3182	11.3238	15.6493	9.49898	10.1701
BCR	29.4475	31.7594	33.9116	45.9823	40.0909	40.5181	44.1024	37.2538	39.354
BCS1L	11.642	13.9858	16.2637	11.175	9.73637	7.43126	7.58752	8.3116	7.07488
BCYRN1	0.410895	0.291371	0.346036	0	0	0.176935	0.47422	0.148422	0
BDH2	43.144	41.9574	51.2134	27.8458	23.6727	25.2132	23.711	17.3653	17.245
BDKRB1	26.5712	25.2036	26.6448	44.6999	42	36.3601	42.2056	42.597	46.4289
BDKRB2	95.7385	100.523	89.6234	202.432	211.336	202.679	215.77	214.617	223.964
BDNF	133.815	135.196	130.456	4.7631	7.06364	8.75827	9.01018	8.90529	9.72797
BDNF.AS	3.42412	3.20508	4.15244	1.64877	0.954546	0.973141	1.89688	1.18737	0.884361
BDP1	0.27393	0	0	0	0.190909	0.265402	0	0.445265	0.884361
BECN1	37.1175	35.1102	38.7561	33.7081	33.6	32.556	26.5563	24.638	28.5206
BEGAIN	0.136965	0.145685	0	0.183196	0.763637	0.265402	0	0.890529	0.44218
BEND3	4.51984	2.76802	4.49847	6.41187	7.06364	7.34279	3.79376	5.93686	4.64289
BEND3P3	5.0677	6.41016	6.57469	4.03032	4.2	2.83096	1.89688	2.96843	2.87417
BEND6	31.365	28.263	30.1052	28.7618	28.8273	28.7519	36.5149	35.7696	36.701
BEND7	1.50661	3.9335	1.73018	0.915981	0.572728	0.530804	0.94844	2.52317	1.54763
BEST1	2.05447	1.74822	1.38415	1.64877	1.90909	2.21168	2.3711	1.33579	2.43199
BEST3	0.136965	0.145685	0	1.46557	1.71818	1.68088	2.3711	4.1558	1.98981
BEST4	0.136965	0.291371	0	0.183196	0.381818	0.176935	0.94844	0.148422	0.22109
BET1	63.2778	65.4127	80.2804	103.872	106.336	104.392	109.545	123.635	121.6
BET1L	50.677	57.5457	50.1753	47.4478	45.2455	43.8798	53.5868	48.3854	52.8405
BEX1	30.4062	31.6137	25.6067	23.6323	25.0091	24.7709	19.9172	19.5916	21.0036
BEX2	0.136965	0.145685	0	0	0	0.265402	0.47422	0.148422	0
BEX3	151.757	158.506	149.834	281.023	264.027	272.922	312.511	324.598	333.625
BEX4	24.5167	24.6208	21.4543	31.5098	31.5	28.398	31.7727	32.8012	30.0683
BFSP1	3.97198	4.37056	4.49847	4.57991	3.43637	5.39651	8.06174	9.49898	5.74834
BGN	69.9891	73.134	59.8643	48.547	42.3818	42.8182	71.133	60.1107	66.106
BHLHE40	9.99844	12.0919	9.34298	140.512	149.864	152.695	235.687	228.569	236.345
BHLHE40.AS1	0.27393	0.291371	1.03811	1.46557	0.190909	0.35387	0	1.33579	0.44218
BHLHE41	10.1354	12.0919	10.0351	16.3045	16.4182	16.6319	31.7727	26.419	23.4356
BHMT	0.136965	0.145685	0	0	0.381818	0.0884674	0.47422	0.296843	0.22109
BHMT2	14.7922	15.297	8.30487	18.8692	17.1818	19.4628	25.1336	21.9664	25.2043
BICC1	199.969	195.073	180.977	85.3695	86.4819	90.856	48.8446	59.517	68.5379
BICD1	50.1292	48.6589	52.2515	71.4465	72.7364	78.559	101.483	98.4035	101.48
BICD2	98.6148	100.377	96.1981	110.101	105.573	111.734	86.7822	97.5129	91.5313
BICDL1	0.27393	0.291371	0.692073	0.183196	0.381818	0	0	0	0.22109
BICRA	9.03969	9.76092	7.95884	5.49589	5.34546	6.63505	4.7422	5.78844	5.96943
BICRAL	24.3798	24.3295	20.7622	19.9684	17.5636	17.4281	15.6493	14.8422	15.6974
BID	46.705	47.7848	47.753	55.3253	52.3091	54.4074	60.2259	58.7749	52.8405
BIN1	17.1206	19.2305	21.1082	9.8926	11.8364	10.8815	17.0719	9.94424	12.8232
BIN3	20.9556	18.065	17.6479	18.3196	19.4727	18.0473	16.1235	18.1074	15.6974
BIN3.IT1	0.136965	0.145685	0.346036	0.549589	0.190909	0.265402	0	0.296843	0
BIRC2	213.391	203.522	193.78	164.51	164.755	170.654	193.956	195.62	184.389
BIRC3	10.5463	10.3437	7.26676	3.48073	2.48182	4.86571	6.16486	3.56212	2.65308
BIRC5	47.6638	55.3604	53.2896	15.5717	15.2727	17.5165	1.42266	1.78106	3.09526
BIRC6	302.145	272.286	272.331	264.352	290.182	266.021	267.46	268.94	243.42
BISPR	0.82179	0.145685	0.692073	0	0	0	0	0.296843	0.22109
BIVM	61.3603	61.4792	69.8993	76.3928	70.8273	69.0046	53.1126	57.2907	56.8202
BLCAP	91.0817	90.0335	85.817	55.1421	51.3546	54.319	63.0712	59.3686	57.9256
BLID	0.82179	0.291371	0	0.915981	0.572728	0.35387	0.47422	0.148422	0.22109
BLK	0.136965	0	0	0.366393	0.763637	0.0884674	0	0.148422	0
BLM	6.84825	10.198	9.34298	2.74794	2.48182	3.45023	0.94844	0.445265	1.32654
BLMH	26.8451	29.8655	25.6067	16.8541	14.5091	14.1548	13.7524	14.3969	15.9185
BLOC1S1	11.642	12.6746	8.99694	8.42703	7.25455	7.51973	4.7422	7.42108	7.29597
BLOC1S2	58.2101	59.731	59.1722	54.5925	49.2546	54.4074	68.2876	69.016	66.327
BLOC1S3	7.53307	6.26447	6.57469	8.06064	8.97273	7.96207	10.4328	7.27265	9.0647
BLOC1S4	17.6685	16.8995	18.3399	26.3803	27.1091	27.248	33.6696	32.2075	27.6363
BLOC1S6	148.196	144.228	147.411	221.301	207.327	223.026	236.161	253.059	245.41
BLVRA	22.3253	22.8726	25.2607	13.1901	14.7	13.1816	14.7008	15.7327	18.7927
BLVRB	9.31362	9.46955	7.95884	6.59507	9.54546	6.90046	9.01018	7.71792	7.73815
BLZF1	68.7564	76.3391	75.782	94.7125	92.5909	102.18	83.4627	93.3571	85.1197
BMF	0.27393	0.437056	0	0.732785	0.954546	1.32701	0.94844	1.33579	1.32654
BMI1	1.64358	2.47665	2.42225	1.83196	0.763637	1.76935	3.79376	1.48422	1.54763
BMP1	40.8155	41.9574	37.718	22.3499	23.4818	25.5671	35.5665	30.1296	37.3642
BMP2	9.31362	9.17818	6.92073	620.852	593.728	621.66	494.611	512.054	519.783
BMP2K	50.5401	47.9305	40.1402	62.1035	60.7091	59.8924	73.9783	66.6413	56.8202
BMP3	1.09572	0.728427	1.73018	1.09918	1.33636	1.15008	1.42266	0.742108	0
BMP4	5.88949	5.53604	7.26676	1.64877	1.33636	1.68088	4.7422	3.41369	2.65308
BMP6	0	0	0	1.28237	0.954546	0.442337	0	1.78106	1.54763
BMP8A	0.958755	0.291371	0.346036	0.549589	0	0.530804	0.94844	0.148422	0
BMP8B	0.136965	0.291371	0	0	0.190909	0.176935	0	0.296843	0
BMPER	57.9362	56.963	60.9024	67.233	66.0546	65.8197	52.1642	52.2444	50.6296
BMPR1A	36.0218	26.6604	29.4131	41.2192	40.4727	37.9525	26.0821	40.5191	30.7315
BMPR1B	0	0	0	0.366393	0.190909	0.265402	0	0	0.22109
BMPR2	427.878	390.728	424.587	317.479	335.809	321.402	318.201	364.078	334.73
BMS1	59.5797	54.7777	65.0548	61.1875	52.1182	55.9114	53.1126	52.6896	59.0311
BMS1P1	3.28716	1.74822	2.42225	1.64877	1.14546	2.21168	2.3711	1.33579	1.76872
BMS1P14	0.958755	0.437056	0	0.549589	0.190909	0.619272	0	0.148422	0.22109
BMS1P2	2.05447	1.31117	1.38415	0.549589	0.954546	0.884674	0.94844	0.742108	0.44218
BMS1P20	15.2031	12.2376	8.30487	8.97662	11.4546	13.9778	14.2266	11.4285	13.9287
BMS1P4	5.0677	5.68173	3.11433	1.83196	2.1	2.74249	3.79376	3.71054	0.884361
BMT2	63.6887	61.6249	59.8643	68.149	67.0091	68.9161	62.597	50.9086	52.8405
BNC1	13.8335	11.3635	13.1494	52.2109	55.9364	59.2732	45.5251	39.6285	36.701
BNC2	81.0832	82.895	86.8551	71.4465	70.0637	66.9698	75.4009	75.3981	82.2455
BNC2.AS1	1.78054	0.582741	1.03811	0.915981	0	0.265402	0	0.593686	0.66327
BNIP1	8.35486	7.42995	5.88262	4.39671	5.34546	5.83885	5.21642	6.08528	6.41161
BNIP2	183.67	181.378	175.44	200.6	207.9	203.21	209.605	212.243	203.403
BNIP3	83.9595	84.4975	120.767	165.609	166.091	161.984	143.689	158.069	165.597
BNIP3L	322.552	327.209	338.424	676.727	676.009	654.393	691.887	728.601	667.25
BNIPL	0.136965	0.145685	0	0.549589	0.381818	0.0884674	0	0.296843	0.22109
BOC	6.57432	8.15838	7.6128	8.61022	7.25455	7.51973	8.53596	6.82739	9.50688
BOD1	47.6638	55.6518	45.6768	37.0056	39.1364	39.2795	41.2571	36.957	34.269
BOD1L1	165.865	151.221	147.065	164.693	160.555	169.68	138.472	131.798	133.76
BOD1L2	0.54786	0.582741	0.346036	0.183196	0.381818	0.35387	0	0.148422	0.22109
BOK	23.558	25.7863	29.4131	18.1364	19.4727	18.5782	17.5461	15.5843	17.4661
BOLA1	2.60233	2.91371	3.46036	2.56475	1.90909	3.00789	2.84532	2.37474	2.65308
BOLA3	36.8436	33.9447	41.8704	30.2274	33.7909	30.6982	31.2985	30.4264	32.0581
BOLA3.AS1	7.67004	10.0523	6.92073	8.61022	5.34546	7.34279	7.58752	10.3895	10.1701
BOP1	23.0101	23.601	21.8003	20.1516	17.7546	19.7282	15.6493	13.2095	16.3607
BORA	9.03969	10.9264	14.1875	6.22867	6.10909	6.19272	6.16486	4.60107	4.4218
BORCS5	11.0942	9.46955	10.3811	18.3196	15.8455	13.2701	14.2266	21.0759	19.677
BORCS6	3.69805	2.91371	3.46036	2.74794	2.67273	1.85782	3.79376	2.52317	5.30616
BORCS7	50.814	49.096	58.4801	53.8597	51.3546	53.0804	61.1743	66.196	63.674
BORCS8	6.71128	7.42995	6.92073	7.32785	6.68182	6.81199	7.1133	6.67897	9.28579
BPGM	22.4622	23.3097	22.8384	44.5167	34.3637	39.6334	55.9579	62.0402	55.9358
BPHL	7.67004	10.198	7.26676	5.31269	4.77273	3.8041	5.21642	6.53055	3.53744
BPNT1	39.5829	38.1696	39.7942	34.0745	36.8455	37.2448	35.5665	39.9254	36.0377
BPTF	152.442	151.95	148.104	157.366	162.846	164.638	174.513	173.505	173.998
BRAF	631.682	644.949	578.227	749.273	758.864	768.782	629.764	655.281	620.821
BRAP	34.9261	33.5076	26.9908	34.6241	32.2637	32.556	33.1954	33.9885	42.2282
BRAT1	19.9969	16.4624	20.4161	23.9987	21.5727	21.8514	28.4532	19.5916	25.8675
BRCA1	27.8039	30.0112	25.9527	13.5565	9.16364	11.0584	5.69064	4.60107	6.85379
BRCA2	25.7494	27.5345	22.4924	18.686	17.1818	19.1974	14.7008	8.75687	7.07488
BRCC3	29.0366	37.1498	33.2195	30.9602	33.7909	35.21	37.9376	35.4727	38.2486
BRD1	36.1587	37.4411	42.5625	33.3417	36.2727	32.4675	31.7727	27.3096	34.0479
BRD2	0.410895	0.582741	0	0.732785	0.763637	0.442337	0.94844	0	1.54763
BRD3	39.8568	39.9178	37.3719	31.1434	24.6273	32.1137	28.4532	27.7548	28.7417
BRD3OS	33.8303	35.9843	36.3338	28.029	29.5909	25.8325	24.1852	22.8569	28.0784
BRD4	59.0319	65.267	61.2484	71.9961	74.6455	67.0583	71.133	59.2202	71.8543
BRD7	23.8319	24.0381	22.8384	23.9987	24.0546	22.0284	18.0204	20.1853	19.4559
BRD7P3	0.54786	0.582741	0.346036	0.549589	0.381818	0.35387	0.94844	0.593686	1.10545
BRD8	45.7463	41.8117	38.41	41.4024	47.7273	42.6413	34.618	36.3633	43.3337
BRD9	30.5432	33.6533	29.7591	20.518	21.3818	23.2669	22.2883	21.0759	18.1294
BRF1	12.6008	15.297	14.8796	10.0758	10.6909	10.97	17.5461	12.4674	11.4967
BRF2	8.49183	9.46955	10.7271	6.96146	7.25455	5.92732	5.21642	6.38212	5.96943
BRI3	169.426	173.657	168.52	146.557	143.564	145.352	186.843	169.497	198.539
BRI3BP	1.09572	1.60254	2.07622	0.915981	0.381818	1.06161	1.42266	1.03895	1.32654
BRICD5	0.54786	0.582741	0	0.183196	0.190909	0.176935	0	0.148422	0.22109
BRIP1	45.3354	40.2092	40.4863	9.15981	8.97273	9.28908	2.3711	1.03895	1.76872
BRIX1	78.207	78.233	75.0899	62.4699	58.9909	56.5307	54.5353	51.057	51.0718
BRK1	135.458	143.791	134.262	154.068	148.718	148.448	170.719	172.763	169.355
BRMS1	18.2163	21.4157	18.3399	25.0979	22.3364	22.1168	26.0821	22.7085	27.1941
BRMS1L	31.228	32.6335	31.1433	24.3651	23.2909	22.2938	20.3914	22.2632	22.5512
BROX	195.86	180.65	198.625	218.92	221.646	219.753	207.234	218.773	202.74
BRPF1	13.2856	10.7807	15.9177	10.9918	10.6909	12.2085	15.6493	13.8032	13.7076
BRPF3	61.3603	59.1483	60.9024	98.926	90.8728	84.6633	78.7205	68.4223	82.0244
BRSK1	3.15019	3.49645	4.15244	3.29753	3.81818	2.65402	3.79376	1.92948	2.43199
BRSK2	0.136965	0.437056	0	0	0.381818	0.442337	0.47422	1.33579	0.66327
BRWD1	113.818	106.787	106.233	129.153	143.182	137.213	135.153	131.65	137.739
BRWD3	47.2529	38.1696	39.7942	40.8528	42	42.5528	45.0509	46.0107	50.4086
BSCL2	1.23268	0.728427	0.692073	0.915981	1.14546	0.707739	0.47422	0.148422	1.10545
BSDC1	60.9494	58.8569	51.9054	66.317	61.8546	59.7155	75.8752	70.5002	80.4768
BSG	227.088	244.606	224.924	246.765	245.7	230.9	286.429	277.697	300.683
BSN	0	0.437056	0.346036	0.183196	0	0.176935	0	0	0.66327
BST1	7.25914	7.57564	5.53658	0.915981	1.14546	0.707739	1.42266	1.92948	0.884361
BST2	1.09572	3.35076	2.76829	0	0	0.176935	0	0.445265	0.22109
BTAF1	93.2731	91.7818	96.1981	117.612	111.682	114.565	126.617	126.604	122.705
BTBD1	212.433	221.587	214.889	263.986	272.809	280.972	262.718	280.071	237.009
BTBD10	52.0467	50.8442	49.1372	37.372	44.1	39.8103	41.2571	42.4486	38.4697
BTBD11	1.36965	0.291371	1.38415	6.96146	5.34546	6.54659	8.53596	9.20213	10.1701
BTBD18	0.54786	0.145685	0.346036	0.366393	0.190909	0.176935	0	0.148422	0.22109
BTBD19	10.5463	8.88681	6.92073	16.1213	16.9909	16.1011	19.9172	15.139	22.5512
BTBD2	54.3751	52.4467	53.2896	40.6696	45.6273	41.1373	44.5767	42.0033	51.2929
BTBD3	88.4793	95.4239	90.3155	52.3941	55.5546	56.0883	61.6486	57.8844	51.0718
BTBD6	30.9541	38.4609	30.7972	27.113	19.6636	26.6287	22.7625	23.4506	22.3301
BTBD8	0.82179	1.45685	0.692073	1.46557	0.572728	0.442337	0.47422	1.18737	0.44218
BTBD9	26.0233	21.2701	29.4131	32.9753	34.1727	32.1137	36.0407	34.2854	33.3846
BTD	12.8747	16.8995	16.9558	6.22867	7.44546	5.57345	9.01018	9.49898	7.95925
BTF3	232.566	223.481	219.041	213.973	186.9	206.394	172.616	165.935	166.702
BTF3L4	56.5665	56.8173	60.2103	41.5855	39.9	39.5449	43.6282	47.6433	51.2929
BTG1	108.887	101.397	113.5	349.722	339.627	346.261	391.706	390.052	368.778
BTG2	25.8864	26.0777	25.6067	8.79342	8.01819	6.98892	6.63908	13.6548	11.4967
BTG3	50.2661	58.4198	61.5945	52.9437	51.9273	51.488	25.1336	21.6695	18.1294
BTN2A1	52.0467	44.2883	49.8292	54.9589	56.3182	56.4422	57.3806	62.7823	60.1365
BTN2A2	8.76576	12.2376	10.3811	14.1061	16.9909	15.9241	19.443	17.6622	15.9185
BTN2A3P	2.19144	2.47665	2.07622	2.56475	2.48182	2.91942	3.79376	3.11685	3.09526
BTN3A1	13.0117	12.3833	15.9177	4.39671	8.97273	8.4044	7.58752	6.67897	5.74834
BTN3A2	19.449	18.9391	21.1082	15.7549	17.3727	16.6319	15.6493	16.1779	17.245
BTN3A3	11.2311	16.7538	12.8033	2.38155	4.39091	2.91942	5.69064	5.78844	5.30616
BTRC	44.5136	48.5132	39.1021	38.288	40.0909	34.3253	45.0509	39.777	35.5955
BUB1	38.3502	44.434	44.9847	12.2741	16.0364	12.12	0.94844	1.03895	1.54763
BUB1B	24.1058	31.468	23.5305	7.51105	7.44546	10.6161	0	1.03895	2.2109
BUB3	183.396	191.722	192.742	157.366	149.1	160.568	130.41	128.978	121.6
BUD13	8.08093	9.17818	8.30487	3.66393	4.96364	5.57345	5.21642	6.08528	4.86398
BUD23	31.228	33.2163	28.721	24.5483	22.9091	25.2132	20.3914	20.4822	20.3403
BUD31	27.1191	25.3493	24.5686	26.9298	25.7727	28.398	20.8657	24.3411	28.7417
BVES	37.3914	36.2757	40.4863	64.1187	70.4455	64.3158	41.7313	43.6359	46.65
BVES.AS1	0.410895	0.145685	0	0.549589	0.381818	1.06161	0.47422	0	1.10545
BYSL	21.2296	19.6675	21.4543	20.518	23.6727	17.5165	15.6493	13.8032	17.0239
BZW1	172.028	165.499	187.898	210.309	218.4	225.503	232.842	233.764	217.774
BZW2	107.654	106.496	111.424	87.2014	97.1728	96.5179	93.8955	84.0066	87.3306
C10orf105	0.82179	1.31117	1.03811	0.915981	1.14546	1.06161	2.3711	2.37474	2.87417
C10orf111	0.958755	0.728427	1.38415	0	0.190909	0.0884674	0.94844	0.445265	0.22109
C10orf143	1.64358	1.45685	1.03811	0.366393	0.763637	0.796207	0.94844	1.33579	2.65308
C10orf25	3.83502	2.18528	4.15244	3.11434	2.86364	3.5387	2.84532	2.67159	2.2109
C10orf55	0.54786	1.0198	1.03811	0.366393	0.381818	0.884674	1.42266	0.148422	0
C10orf67	0.27393	0.291371	0.346036	0.915981	0.954546	0.530804	0.94844	0.296843	0.66327
C10orf88	26.8451	25.2036	28.0289	28.7618	29.9727	26.2748	26.5563	27.7548	23.8777
C10orf90	0.27393	0	0	0.183196	0.381818	0.0884674	0.94844	0.296843	0.44218
C11orf1	6.57432	6.11878	8.99694	3.11434	3.81818	4.6003	5.69064	4.45265	3.53744
C11orf24	61.6342	62.499	64.0167	45.7991	42.1909	37.1563	45.0509	41.7064	35.8166
C11orf44	0.136965	0.145685	0.346036	0	0.381818	0	0.47422	0	0
C11orf45	1.09572	0.874112	1.03811	0.549589	0.381818	0.619272	0	0.742108	1.54763
C11orf49	19.0381	21.9985	13.1494	10.0758	14.1273	10.4392	14.2266	12.0221	14.1498
C11orf54	25.7494	27.6802	29.7591	31.3266	23.4818	28.7519	38.4118	32.6527	31.3948
C11orf58	257.22	264.856	268.178	242.735	251.618	250.363	208.657	219.961	207.161
C11orf65	0.684825	1.0198	0.692073	0.366393	1.33636	0.884674	0.47422	1.48422	0.44218
C11orf68	34.1043	37.5868	35.9878	28.7618	27.8727	23.4439	24.1852	23.599	22.3301
C11orf71	2.7393	2.62234	1.38415	1.28237	1.90909	1.68088	1.89688	1.03895	3.53744
C11orf74	12.1899	10.9264	9.34298	5.49589	4.58182	6.01578	2.3711	5.78844	5.08507
C11orf80	4.65681	4.80762	5.88262	5.1295	4.00909	2.83096	7.1133	4.00738	5.08507
C11orf87	1.23268	1.60254	1.73018	0.183196	0.381818	0.265402	0.47422	0.445265	0.22109
C11orf88	0.684825	0.582741	1.03811	0	0	0	0	0.148422	0
C11orf91	4.65681	3.05939	2.42225	12.4573	9.73637	10.0853	8.53596	11.5769	11.2756
C11orf95	33.0085	34.3817	25.9527	54.5925	57.6546	55.8229	65.4423	61.8918	64.1161
C11orf96	0.54786	0.437056	1.38415	31.3266	26.9182	22.5592	11.8555	16.1779	17.6872
C11orf98	0.136965	0	0.692073	0.549589	0.381818	0.35387	0.47422	0.445265	0.884361
C12orf10	14.6552	15.5883	13.8415	18.3196	15.0818	18.2243	19.443	16.9201	23.2145
C12orf29	50.4031	49.6787	46.3689	62.2867	75.4091	72.9856	72.0814	68.5707	68.3169
C12orf4	42.87	44.434	39.4481	24.9147	26.9182	23.7977	26.0821	25.8253	29.1839
C12orf43	11.0942	14.8599	8.99694	11.9078	12.9818	12.2085	9.4844	14.3969	12.16
C12orf45	4.79377	7.28427	4.84451	4.7631	2.86364	3.00789	0.94844	2.82001	2.87417
C12orf49	41.0895	41.9574	39.7942	58.9892	63.5728	61.3964	68.2876	78.515	68.3169
C12orf56	0	0	0	1.46557	0.572728	0.530804	2.84532	1.03895	0.22109
C12orf57	35.063	42.9772	36.6799	42.5015	40.8546	40.695	60.2259	58.7749	62.7896
C12orf60	0.410895	0.437056	1.38415	1.09918	0.190909	0.619272	0.94844	1.03895	0
C12orf65	12.4638	13.6944	16.9558	5.67908	5.53637	8.84674	5.69064	6.38212	5.74834
C12orf66	6.98521	5.24467	5.88262	8.97662	6.87273	8.84674	8.53596	7.86634	6.85379
C12orf71	0	0	0.692073	0	0.190909	0	0	0	0.22109
C12orf73	4.79377	3.9335	2.07622	3.66393	3.24546	3.09636	9.4844	10.2411	8.84361
C12orf75	1666.18	1681.65	1802.85	791.957	784.637	773.647	393.128	412.018	400.836
C12orf76	5.0677	5.39036	4.15244	2.56475	2.86364	4.24643	6.16486	5.78844	4.20071
C14orf119	69.0303	66.4325	60.5564	79.6904	76.5546	85.548	70.1845	81.7803	80.6979
C14orf132	102.998	98.0462	90.3155	78.9576	81.7091	81.4785	98.1635	98.255	105.681
C14orf28	10.4093	10.7807	8.30487	8.79342	7.25455	8.58134	12.3297	8.3116	10.1701
C14orf93	2.7393	4.07919	4.15244	2.19836	1.71818	2.21168	1.42266	1.92948	1.32654
C15orf39	9.03969	10.3437	8.99694	11.7246	12.4091	10.0853	11.3813	10.8348	13.9287
C15orf40	11.0942	11.3635	13.8415	10.259	7.82728	10.0853	9.01018	9.49898	10.8334
C15orf41	24.6537	24.1838	21.4543	9.52621	6.49091	6.90046	5.69064	5.4916	6.85379
C15orf48	2.60233	1.45685	4.49847	40.6696	43.3364	40.695	55.0095	60.7044	48.8609
C15orf61	7.94397	6.84721	13.1494	6.22867	5.72728	6.54659	6.16486	7.12423	7.07488
C15orf62	1.09572	1.16548	2.42225	0.183196	0.572728	0.796207	1.89688	0.296843	1.32654
C15orf65	1.36965	0.728427	1.03811	1.46557	1.14546	1.32701	3.31954	1.48422	1.10545
C16orf46	2.60233	3.9335	2.07622	5.1295	3.24546	1.85782	2.3711	2.37474	3.09526
C16orf58	36.8436	37.2955	33.2195	25.0979	26.9182	25.3901	20.3914	24.0443	21.6668
C16orf70	17.8054	16.1711	13.1494	19.4188	14.7	17.605	24.6594	18.998	14.5919
C16orf71	0.136965	0.582741	0	0.366393	0.190909	0	0	0.148422	0.44218
C16orf72	101.765	97.7549	91.3536	138.68	141.082	137.478	116.658	129.424	120.936
C16orf74	2.3284	2.33097	2.76829	7.14465	3.62727	6.01578	0.94844	3.41369	3.31635
C16orf86	0.410895	1.16548	0.692073	0.732785	0.572728	0.530804	0	0.296843	0.884361
C16orf87	25.6124	25.7863	22.4924	14.2893	16.4182	16.6319	10.9071	15.5843	17.0239
C16orf90	3.15019	5.24467	5.19054	2.19836	5.34546	4.6003	2.3711	3.11685	3.97962
C16orf91	6.16342	6.70153	6.57469	5.86228	6.68182	7.78513	15.6493	9.35055	5.52725
C16orf95	1.91751	2.03959	2.76829	1.46557	1.33636	1.15008	1.89688	1.18737	1.76872
C17orf100	0.82179	0.728427	1.73018	1.28237	1.71818	2.12322	1.42266	1.33579	1.98981
C17orf107	0.54786	0.437056	0.346036	0.183196	0	0.176935	0	0.148422	0.884361
C17orf51	23.9689	22.8726	24.9146	48.3638	46.7727	51.7534	48.8446	47.0496	44.6602
C17orf53	1.78054	2.91371	3.11433	2.01516	2.67273	2.12322	1.89688	0.890529	2.65308
C17orf58	14.1074	14.2772	17.3018	8.97662	9.92728	8.22747	9.01018	11.8737	11.4967
C17orf67	4.38288	4.66193	5.53658	5.49589	3.43637	3.8041	3.79376	3.41369	3.31635
C17orf75	22.8731	24.0381	26.2988	10.0758	11.4546	10.97	11.8555	10.2411	7.95925
C17orf80	32.7346	32.1965	29.7591	18.5028	16.6091	19.109	13.2782	17.0685	20.1192
C17orf82	0.410895	0.145685	0	0	0.190909	0.176935	0.47422	0.296843	0.44218
C17orf97	1.50661	1.16548	1.73018	1.09918	0.954546	0.707739	0.47422	0.890529	0.22109
C18orf21	19.8599	20.5416	15.5716	19.2356	16.9909	19.2859	15.175	19.7401	16.3607
C18orf25	65.8801	64.2472	66.0929	56.6076	52.1182	51.665	59.2775	54.4707	51.9562
C18orf32	0.684825	0.145685	1.03811	1.28237	0.381818	0.619272	1.42266	0.742108	1.54763
C18orf54	26.8451	29.4284	25.6067	12.6405	11.6455	11.5008	11.8555	11.8737	16.5818
C18orf65	0.410895	0.582741	0.346036	1.09918	0.763637	0.35387	0.94844	0.890529	1.32654
C19orf12	58.8949	53.0295	56.75	49.463	59.3728	55.9114	47.8962	52.2444	54.6093
C19orf18	0.82179	0.291371	1.03811	0.549589	0.190909	0.707739	0.47422	0.742108	0.66327
C19orf24	14.7922	16.0254	15.2256	21.6172	19.8546	19.3744	20.8657	22.2632	21.4457
C19orf25	15.0661	13.8401	20.0701	10.9918	11.0727	12.6508	12.3297	11.28	15.4763
C19orf38	0	0	0.346036	0.183196	0.190909	0	0.47422	0.148422	0.22109
C19orf44	4.38288	4.07919	5.19054	3.84712	4.2	3.45023	4.26798	4.74949	3.31635
C19orf47	9.72451	8.74112	10.3811	10.0758	6.3	7.07739	12.3297	5.4916	7.73815
C19orf48	16.2988	16.7538	14.5335	9.7094	7.25455	9.55448	5.21642	8.46003	7.29597
C19orf53	48.8965	46.765	40.4863	60.0884	53.6455	56.3537	79.1947	69.9065	73.8441
C19orf54	3.56109	4.22488	3.46036	2.74794	2.67273	2.47709	3.79376	2.82001	3.75853
C19orf57	0.27393	0	0.346036	0	0	0.0884674	0	0	0.66327
C19orf66	22.4622	16.8995	20.7622	21.9836	21.9546	18.7551	18.9688	21.0759	20.3403
C19orf70	16.0249	16.0254	11.0732	11.3582	11.2636	12.297	11.8555	14.6937	15.2552
C19orf71	1.64358	2.03959	2.76829	2.56475	2.86364	3.09636	5.21642	3.11685	2.87417
C19orf73	0	0.145685	0.346036	0.366393	0	0	0.47422	0.148422	0.22109
C1D	33.8303	38.4609	39.1021	37.9216	36.6546	39.8103	27.979	32.5043	32.2792
C1GALT1	113.955	115.966	117.998	154.434	164.564	161.984	150.802	159.553	170.018
C1GALT1C1	60.1276	70.2203	64.0167	89.583	83.6182	89.0867	107.174	101.372	92.4157
C1orf100	0	0	0.346036	0.732785	0.190909	0.0884674	0	0.148422	0
C1orf109	32.3237	36.8584	39.7942	28.029	29.5909	27.6903	31.2985	26.8643	26.7519
C1orf112	13.6965	14.5685	13.1494	7.69424	6.49091	7.6082	7.1133	6.97581	4.4218
C1orf115	2.60233	1.89391	3.8064	0.366393	0.763637	0.707739	0.47422	0	0.44218
C1orf122	36.1587	37.7325	38.41	31.8761	31.8818	29.902	39.8345	41.4096	45.9867
C1orf123	16.1619	20.3959	15.9177	11.3582	12.2182	11.7662	15.175	10.5379	12.6021
C1orf131	17.9424	18.6477	19.378	8.42703	10.8818	12.9162	14.2266	9.94424	13.4865
C1orf146	0.136965	0.437056	0.346036	0.183196	0.190909	0.0884674	0	0.148422	0
C1orf159	4.38288	6.11878	5.19054	3.66393	5.91818	5.75038	9.95861	5.93686	8.84361
C1orf162	0.27393	0.145685	0	0	0.190909	0.176935	0.47422	0	0.22109
C1orf174	25.2015	28.4086	22.1463	20.518	19.2818	22.0284	24.1852	19.4432	18.3505
C1orf198	193.258	183.418	203.469	54.2261	56.5091	56.3537	46.4735	49.1275	40.0173
C1orf21	19.9969	20.2503	18.3399	5.86228	6.49091	6.36965	4.7422	10.3895	7.95925
C1orf216	29.7214	29.7198	23.1844	29.6778	29.0182	31.229	35.5665	27.7548	30.9526
C1orf220	1.09572	1.45685	1.38415	0.915981	0.381818	0.973141	0.47422	0.593686	0.22109
C1orf226	2.60233	2.62234	2.76829	0.183196	0.190909	0.530804	0	0.445265	0.44218
C1orf229	0.27393	0.291371	0	0.732785	0	0.530804	0.94844	1.03895	0.22109
C1orf35	12.8747	7.72132	11.7652	9.8926	9.35455	7.25433	14.2266	8.60845	10.1701
C1orf43	150.251	146.997	132.186	172.754	170.864	169.504	113.813	133.876	129.559
C1orf50	6.71128	4.9533	4.49847	4.7631	4.58182	6.72352	5.69064	4.74949	6.19052
C1orf52	33.9673	37.8782	35.2957	30.777	33.2182	33.6176	37.9376	46.4559	46.8711
C1orf53	12.7377	11.8005	11.4192	4.7631	5.72728	5.57345	6.63908	8.60845	9.50688
C1orf54	6.16342	4.07919	3.11433	2.01516	4.2	4.42337	8.53596	4.74949	5.96943
C1orf56	2.7393	2.03959	2.42225	1.28237	3.24546	2.12322	3.79376	2.22632	2.87417
C1orf74	3.42412	3.35076	2.76829	3.66393	2.1	2.74249	2.3711	2.0779	2.65308
C1QBP	76.5634	69.6376	79.5884	80.6064	80.5637	82.4516	59.7517	57.8844	56.1569
C1QL1	0.136965	0.145685	0	0.183196	0.190909	0	0.47422	0	0
C1QL3	0.82179	1.0198	1.73018	0.732785	0.572728	0.35387	0.94844	0.296843	0.66327
C1QTNF1	26.4342	22.7269	25.9527	47.0814	47.5364	38.9257	36.9891	29.3875	31.1737
C1QTNF2	1.50661	2.18528	0	0.366393	0	0.265402	0	0.593686	0.66327
C1QTNF3	0.410895	1.45685	1.38415	0	0.190909	0.530804	1.42266	0.593686	0.44218
C1QTNF6	4.65681	4.07919	3.46036	2.38155	3.24546	1.85782	4.26798	3.11685	4.4218
C1R	33.5564	34.9645	38.064	5.67908	5.91818	6.19272	11.3813	12.1706	12.8232
C1RL	22.7362	21.7071	22.8384	9.8926	12.9818	13.5355	18.0204	17.6622	17.245
C1RL.AS1	5.61556	6.84721	6.22865	6.04548	6.87273	5.13111	8.06174	5.93686	8.62252
C1S	60.6755	57.8371	57.7881	15.9381	16.2273	17.7819	29.4016	32.8012	24.9832
C20orf144	0.136965	0	0	0.183196	0.572728	0.265402	0.47422	0.148422	0
C20orf194	79.4397	78.8158	74.3978	70.3474	69.1091	68.0314	80.6174	74.5076	79.8135
C20orf204	0.136965	0.437056	0	0.183196	0	0	0.47422	0.148422	0
C20orf27	16.5728	16.7538	13.4954	14.4725	15.8455	11.2354	15.175	12.7642	8.84361
C20orf96	3.15019	2.76802	1.73018	2.38155	1.71818	1.94628	2.3711	2.37474	2.87417
C21orf58	3.83502	5.68173	4.15244	1.46557	0.572728	0.884674	1.42266	1.03895	1.10545
C21orf59.TCP10L	0.684825	1.0198	0.346036	0.549589	0.763637	0.707739	0	0.296843	1.10545
C21orf91	29.0366	25.7863	29.7591	18.1364	20.4273	22.8246	15.175	15.2874	17.0239
C22orf23	10.4093	9.03249	8.65091	12.6405	8.01819	7.8736	7.1133	8.01476	9.28579
C22orf24	0.410895	0.291371	0.692073	0	0.190909	0.176935	0	0	0
C22orf39	10.5463	10.9264	11.0732	8.24383	6.68182	6.54659	7.1133	5.64002	7.73815
C22orf46	8.08093	8.44975	7.26676	4.9463	5.15455	4.68877	5.21642	3.26527	4.20071
C2CD2	69.4412	72.2599	68.1692	275.71	297.246	279.999	310.14	297.585	294.271
C2CD2L	8.76576	8.01269	8.30487	14.1061	11.8364	12.2085	19.9172	13.9516	14.3709
C2CD3	33.8303	33.799	37.3719	24.5483	25.3909	24.1516	18.4946	22.2632	22.5512
C2CD4A	0	0	0	0.549589	1.14546	0.35387	0	0	0.22109
C2CD4C	0.136965	0	0	0.549589	0.190909	0.176935	0.47422	0.742108	0.884361
C2CD5	51.9097	49.533	49.4832	19.7852	20.8091	23.2669	24.1852	19.2948	19.2348
C2CD6	1.09572	0.291371	0.346036	0.549589	0.763637	0.884674	0.94844	0.445265	0.884361
C2orf15	0.136965	0.145685	0.692073	0	0	0.265402	0.47422	0.445265	0.66327
C2orf16	2.87626	2.76802	3.11433	3.66393	5.91818	5.57345	1.42266	3.85896	4.20071
C2orf27A	4.10895	3.64213	5.19054	7.32785	5.72728	5.39651	6.63908	4.89791	5.30616
C2orf42	9.86148	13.5487	18.3399	18.8692	14.7	14.6856	10.4328	15.7327	16.5818
C2orf49	44.7875	45.3081	54.3277	37.5552	34.1727	36.0947	30.8243	40.2222	38.0275
C2orf66	1.91751	1.60254	0.346036	1.28237	1.71818	1.41548	0.94844	1.48422	2.43199
C2orf68	15.0661	15.8797	15.5716	12.6405	11.6455	11.9431	6.63908	9.79582	9.72797
C2orf69	60.4015	61.6249	65.7469	68.8818	61.0909	65.112	58.329	57.736	58.1467
C2orf74	15.3401	19.6675	20.0701	10.6254	11.0727	10.6161	9.4844	9.94424	10.8334
C2orf76	8.62879	8.74112	11.0732	9.15981	7.25455	8.6698	8.53596	12.319	11.9389
C2orf81	1.09572	0.437056	2.07622	1.09918	1.90909	1.06161	2.84532	2.22632	1.98981
C2orf88	2.7393	1.16548	2.07622	2.38155	1.52727	1.94628	0.94844	1.03895	1.54763
C2orf92	1.36965	2.03959	1.03811	1.64877	2.67273	2.74249	1.89688	3.41369	2.87417
C3	17.3945	12.5289	13.4954	41.2192	38.3727	32.2021	19.443	18.5527	15.6974
C3AR1	0.410895	0.728427	0	3.66393	2.67273	2.83096	5.69064	7.12423	5.52725
C3orf14	8.49183	8.59544	12.8033	7.51105	7.25455	8.139	8.06174	10.5379	9.0647
C3orf18	9.58755	6.9929	8.99694	3.66393	4.96364	4.68877	9.95861	5.64002	7.51706
C3orf20	0	0.291371	0	0.366393	0.190909	0.176935	0	0	0.22109
C3orf33	5.61556	4.22488	5.19054	3.84712	3.81818	3.98103	0.94844	3.56212	3.53744
C3orf35	0.82179	0.874112	0.692073	0.549589	0	0.707739	0.47422	0.742108	1.10545
C3orf38	44.3766	48.0762	39.1021	41.036	41.4273	42.9067	47.422	42.8938	48.4187
C3orf49	0.27393	0	0.346036	0	0.572728	0.176935	0	0	0.22109
C3orf52	9.99844	9.9066	7.6128	14.1061	14.5091	13.0932	10.4328	9.49898	10.6123
C3orf58	73.5502	80.564	79.2423	116.513	115.309	110.584	98.1635	112.207	100.154
C3orf62	7.25914	8.44975	4.84451	7.51105	7.06364	6.54659	6.16486	7.5695	7.07488
C3orf67	6.98521	5.53604	4.49847	23.2659	24.0546	22.9131	19.9172	19.7401	25.6465
C3orf70	5.0677	2.03959	5.53658	1.09918	2.1	2.12322	1.42266	1.03895	0.884361
C3orf80	0.82179	0.874112	0.346036	0.549589	0.572728	0.442337	0.47422	0.593686	0.22109
C4orf3	127.925	134.905	130.11	111.933	106.909	107.311	207.234	242.669	234.356
C4orf33	12.4638	10.3437	12.8033	2.19836	3.62727	4.0695	0.94844	2.96843	2.2109
C4orf36	1.50661	0.437056	1.03811	0.549589	0.572728	0.530804	0	0.148422	0.44218
C4orf46	48.2117	48.0762	51.2134	28.3954	35.1273	29.725	26.5563	30.278	27.8574
C4orf47	0.136965	0.437056	0	0.183196	0.381818	0.530804	0.47422	0.296843	0.44218
C4orf48	21.5035	23.601	26.6448	15.9381	14.3182	17.1627	26.5563	24.0443	27.1941
C5	4.79377	6.55584	7.26676	2.19836	1.90909	2.83096	4.26798	2.37474	2.43199
C5AR1	0.410895	0.728427	0.692073	0.183196	0.954546	0.530804	1.89688	1.18737	1.32654
C5orf15	160.523	158.651	167.828	114.314	126.191	112.619	143.214	168.013	163.828
C5orf17	1.78054	2.18528	1.73018	0.915981	0.190909	0.973141	0.47422	0.593686	0.22109
C5orf22	43.8288	39.335	44.6387	28.7618	25.3909	29.6366	24.1852	27.6064	28.9628
C5orf24	351.589	325.752	373.373	388.376	420.382	404.208	380.798	397.918	377.622
C5orf30	355.15	341.632	373.027	86.4686	89.9182	83.2478	55.0095	68.2739	66.7692
C5orf34	8.08093	8.88681	7.26676	8.42703	8.59091	9.46601	8.53596	11.4285	12.6021
C5orf38	3.69805	3.20508	6.22865	2.56475	2.86364	4.24643	5.69064	6.38212	5.08507
C5orf51	141.896	125.581	144.989	198.402	187.473	183.658	183.997	192.651	185.937
C5orf56	1.09572	1.45685	1.03811	1.28237	0.572728	1.06161	0	0.296843	0.66327
C5orf63	2.7393	3.9335	2.07622	0.366393	1.14546	0.707739	0	0.890529	1.32654
C5orf66	5.88949	6.9929	5.53658	4.03032	4.58182	4.6003	3.31954	4.30422	4.4218
C6	0.136965	0.291371	0.346036	0	0.381818	0.265402	0	0.296843	1.10545
C6orf106	100.395	98.3376	87.2012	154.801	163.418	158.534	162.183	141.297	158.964
C6orf120	132.993	138.11	152.948	126.955	112.636	126.597	84.4111	95.1382	87.3306
C6orf132	5.75253	5.53604	3.11433	0.732785	0.763637	1.50395	0	0.593686	0.884361
C6orf141	0.684825	0.582741	0	0.183196	1.14546	0.530804	1.89688	1.92948	2.43199
C6orf163	0.958755	0.582741	1.03811	0.183196	0.190909	0.35387	0.47422	0.148422	0.44218
C6orf201	1.64358	0.728427	2.07622	1.64877	1.71818	1.59241	0.47422	1.78106	1.10545
C6orf203	12.3268	13.4031	10.7271	11.7246	13.1727	12.7393	9.4844	12.319	9.72797
C6orf226	3.28716	2.91371	3.46036	2.56475	3.05455	2.56555	2.84532	3.85896	3.31635
C6orf52	0.136965	0	0	0.366393	0	0.176935	0	0.593686	0
C6orf62	223.938	215.614	228.384	186.311	177.736	190.913	172.142	185.972	191.906
C6orf89	154.086	150.347	135.646	108.635	101.373	111.911	116.658	120.073	116.736
C7	0	0.291371	0.692073	0	0	0	0	0	0.22109
C7orf25	14.1074	11.6548	16.2637	12.8237	11.2636	15.5703	15.6493	13.3579	13.7076
C7orf26	14.7922	13.8401	11.4192	14.1061	12.6	10.5276	14.7008	9.35055	10.1701
C7orf31	2.19144	3.64213	1.73018	0.732785	0.763637	0.796207	1.42266	1.03895	0.66327
C7orf43	16.7097	16.0254	14.5335	16.4877	22.5273	18.5782	30.8243	18.2558	22.7723
C7orf50	29.1735	31.1767	29.4131	15.5717	12.6	16.1895	23.2368	18.2558	19.0138
C7orf57	0.54786	0.145685	0.346036	0.915981	2.1	1.06161	0.94844	1.03895	0.66327
C7orf61	0.27393	0.437056	0.346036	0.549589	0.572728	0.619272	0.47422	0.445265	0.884361
C8G	0.136965	0.291371	0.346036	0.183196	0.190909	0.0884674	0.47422	0	0.66327
C8orf33	36.2957	41.0833	35.2957	36.8224	31.5	30.9636	38.886	33.8401	40.6806
C8orf34	2.87626	2.91371	4.15244	0.366393	0.381818	0.707739	0.94844	0.296843	0.22109
C8orf37	5.34163	7.28427	6.57469	1.64877	2.86364	3.09636	2.84532	2.82001	3.09526
C8orf44	3.69805	2.91371	3.11433	1.64877	0.954546	1.94628	0.94844	1.33579	1.10545
C8orf48	2.87626	2.62234	4.84451	1.83196	2.29091	2.30015	1.42266	1.92948	2.43199
C8orf58	10.2724	12.966	10.7271	6.04548	6.87273	7.25433	5.69064	6.38212	7.07488
C8orf59	33.6934	36.4213	37.0259	30.777	31.6909	29.902	28.4532	27.0127	22.7723
C8orf76	8.49183	11.2178	13.8415	11.3582	11.4546	11.3238	10.9071	9.94424	11.9389
C8orf82	9.72451	12.2376	11.0732	14.2893	14.3182	10.8815	12.3297	13.2095	15.4763
C8orf88	4.51984	5.24467	5.53658	4.21351	2.86364	4.24643	0.94844	2.52317	2.87417
C9orf116	1.78054	0.874112	1.73018	0.366393	0.381818	0.619272	0	0.593686	0.884361
C9orf147	0.82179	0.145685	0	0	0	0	0	0.148422	0.22109
C9orf152	0.136965	0.145685	0.346036	0.549589	0	0.0884674	0	0	0
C9orf153	0.410895	0	0	0.366393	0	0.0884674	0	0	0.44218
C9orf16	13.1486	14.8599	14.1875	20.7012	18.3273	20.1706	46.4735	38.4412	41.5649
C9orf163	0.27393	0	0.346036	0.183196	0.381818	0.176935	0	0.296843	0.44218
C9orf3	18.3533	18.6477	16.9558	4.57991	7.82728	6.54659	6.63908	6.2337	5.96943
C9orf40	19.1751	21.9985	21.8003	12.8237	9.92728	12.7393	8.53596	11.1316	10.6123
C9orf41.AS1	0.54786	0.145685	0	0.549589	0.190909	0.796207	0	0.148422	0.22109
C9orf43	0	0.291371	0.692073	0.549589	0.190909	0.176935	0	0.296843	0.22109
C9orf47	3.83502	3.9335	1.38415	0.915981	1.14546	0.619272	0.47422	1.03895	0.22109
C9orf50	0	0.145685	0	0	0.190909	0.265402	0.47422	0.148422	0
C9orf64	10.4093	12.3833	9.34298	7.87744	10.8818	11.4123	8.53596	8.16318	10.3912
C9orf72	3.69805	5.24467	3.8064	30.0442	29.5909	27.3364	43.154	39.9254	38.4697
C9orf78	51.3618	54.7777	47.0609	67.7826	61.4728	66.0851	64.0197	69.9065	67.4325
C9orf84	0.82179	0.874112	0.346036	0.915981	0.381818	0.796207	0.47422	0.593686	0
C9orf85	22.5992	17.9193	13.1494	24.1819	20.4273	22.0284	19.443	20.4822	23.6566
CA11	1.23268	1.60254	1.03811	0.183196	0.572728	0.973141	2.3711	1.03895	1.10545
CA12	21.2296	19.6675	19.032	43.7839	37.4182	47.0647	28.4532	23.7474	27.6363
CA13	0.136965	0.291371	0.346036	0.549589	0.190909	0.176935	0.94844	0.890529	1.10545
CA14	0.136965	0.582741	1.03811	0.549589	0	0	0.94844	0	0.22109
CA5B	5.4786	4.80762	6.22865	3.66393	3.43637	4.86571	3.31954	5.4916	4.20071
CA5BP1	1.64358	1.45685	3.11433	2.74794	3.05455	3.00789	2.3711	2.22632	3.09526
CA7	0	0.437056	0	0.183196	0.190909	0.176935	0.47422	0.148422	0.22109
CA9	0	0	0.346036	0	0	0	0.47422	0	0.22109
CAAP1	43.007	42.1031	41.8704	44.5167	37.9909	34.9446	41.2571	47.198	40.9017
CAB39	214.076	213.138	216.619	251.528	261.546	236.562	271.728	268.346	252.927
CAB39L	37.1175	35.9843	32.1814	80.6064	83.4273	89.1751	38.886	37.5506	45.1024
CABCOCO1	0.54786	0.874112	0.346036	0	0	0	0	0	0
CABIN1	46.842	48.6589	42.2164	39.5704	40.0909	40.4296	44.5767	32.3559	32.9424
CABLES1	11.0942	11.5091	12.8033	6.04548	4.2	5.66191	2.84532	1.48422	4.4218
CABLES2	8.49183	11.9462	11.7652	5.86228	9.16364	7.07739	6.16486	8.16318	7.73815
CABP7	0.27393	0.291371	0	0.183196	0	0.0884674	0.47422	0.148422	0.44218
CABYR	6.43735	6.41016	4.84451	1.83196	1.90909	2.65402	1.42266	1.63264	2.65308
CACFD1	4.24591	5.09899	2.76829	4.9463	3.24546	3.18483	4.7422	5.4916	6.41161
CACHD1	9.58755	11.5091	11.4192	22.5331	23.8636	23.3554	15.175	17.959	16.8029
CACNA1A	34.2412	36.567	26.6448	84.2703	84	79.6207	86.308	83.2645	86.8884
CACNA1C	27.53	25.6406	25.6067	4.9463	5.91818	5.04264	10.4328	9.6474	10.1701
CACNA1C.AS1	0.27393	0	0	0.366393	0	0	0	0.148422	0.22109
CACNA1G	0.136965	0.437056	0.346036	0	0	0.265402	0.47422	0.445265	0.44218
CACNA2D1	132.171	141.898	156.754	293.297	296.864	299.462	503.147	551.089	534.817
CACNA2D2	0.958755	0.145685	0.692073	0.183196	0	0.619272	0.47422	0.296843	0.66327
CACNA2D3	0.410895	0.291371	0.346036	0.915981	0	0.35387	0	0.148422	0.44218
CACNB1	5.4786	5.53604	1.73018	5.1295	3.81818	4.3349	7.58752	5.04633	4.20071
CACNB2	0.82179	0.728427	0.692073	0.366393	0.190909	0.530804	0	0.148422	0
CACNB3	26.2973	28.1173	20.7622	18.1364	17.9455	16.3665	17.0719	15.8811	17.0239
CACNB4	0.54786	0.874112	1.38415	0	0.381818	0.530804	0.94844	1.33579	0.22109
CACNG7	1.64358	1.0198	1.03811	4.21351	3.81818	3.36176	3.79376	3.11685	3.53744
CACNG8	0.82179	1.31117	0.346036	2.01516	1.33636	1.59241	2.84532	2.0779	1.76872
CACTIN	7.94397	7.13858	11.7652	8.24383	6.10909	6.36965	8.06174	6.67897	7.73815
CACTIN.AS1	0.136965	0.437056	0.346036	0.366393	0.572728	0.176935	0	0.445265	0.66327
CACUL1	80.5354	85.9544	85.817	111.2	115.309	115.185	121.4	123.338	111.872
CACYBP	68.0716	68.1807	63.3246	72.9121	72.7364	79.7976	55.9579	64.8602	67.4325
CAD	63.2778	67.4523	60.9024	52.2109	51.7364	51.488	39.8345	39.9254	42.2282
CADM1	4.10895	3.35076	2.42225	0.549589	0.190909	0.35387	1.42266	2.22632	1.76872
CADM4	0.82179	1.31117	1.73018	0.732785	0.381818	0.530804	0.47422	0.890529	2.43199
CADPS	0	0.291371	1.03811	0.366393	0.763637	0.0884674	0	0	1.54763
CADPS2	2.3284	3.05939	2.07622	2.56475	2.86364	2.30015	2.84532	3.56212	3.75853
CAHM	0.684825	0	0.346036	0.549589	0.763637	0.176935	1.42266	0.296843	0.66327
CALCOCO1	48.8965	49.3873	46.3689	50.9286	53.2637	53.1689	64.0197	60.556	57.4834
CALCOCO2	96.8342	104.019	88.5853	110.467	92.0182	102.711	120.926	111.019	101.48
CALCRL	2.87626	2.76802	4.49847	14.1061	11.0727	12.3854	8.53596	7.12423	6.85379
CALD1	4349.73	4286.35	4395.01	1050.63	1047.9	1065.94	712.278	742.256	704.614
CALHM1	0.136965	0	0.346036	0	0.190909	0.176935	0.47422	0.148422	0
CALHM2	33.1455	35.5472	34.6036	20.8844	18.9	18.7551	30.3501	23.4506	25.6465
CALHM4	0.136965	0	0.346036	0.366393	0.381818	0.176935	0	0	0.22109
CALHM5	21.3665	17.7736	18.3399	8.79342	12.7909	11.1469	14.2266	14.1	12.381
CALHM6	0.684825	0.728427	0.692073	0.549589	0.381818	0.176935	0.94844	0.593686	0.22109
CALM1	483.212	482.656	477.53	541.528	546.382	555.31	570.961	613.426	605.345
CALM2	1229.81	1236.43	1291.06	1015.27	1016.97	1066.83	898.172	953.757	944.718
CALM3	261.603	261.505	247.762	148.572	138.6	146.237	166.925	154.952	161.838
CALML4	6.57432	4.22488	4.49847	2.93114	2.86364	3.62716	2.3711	2.67159	2.65308
CALR	941.36	947.246	934.298	656.026	625.991	600.163	714.649	720.141	744.411
CALU	1880.67	1794.41	1775.17	1338.62	1313.26	1354.79	1633.69	1722.28	1675.2
CAMK1	10.2724	8.74112	11.0732	11.5414	15.6546	12.4739	11.3813	14.3969	12.6021
CAMK1D	3.83502	2.62234	3.11433	1.64877	0.954546	0.707739	2.84532	2.0779	5.30616
CAMK1G	0.136965	0.437056	0	0.366393	0	0.619272	0	0.148422	0.44218
CAMK2A	0.136965	0.291371	0	0.183196	0	0.265402	0.47422	0	0
CAMK2D	310.91	307.979	321.468	172.754	174.682	172.777	183.049	193.245	186.379
CAMK2G	39.4459	39.4807	34.9497	21.9836	23.6727	26.7172	30.3501	25.5285	26.3097
CAMK2N1	270.095	268.352	274.753	422.267	414.082	418.097	401.664	411.721	407.69
CAMK2N2	0.54786	0.437056	0	0.366393	0.763637	0.796207	0.94844	1.18737	2.43199
CAMK4	19.3121	20.6873	21.1082	6.77826	7.63637	6.72352	2.84532	8.3116	6.19052
CAMKK1	5.0677	5.82741	5.19054	10.9918	9.92728	10.3507	10.4328	11.8737	13.9287
CAMKK2	51.0879	48.3675	50.1753	33.7081	33.7909	30.9636	30.3501	32.9496	32.9424
CAMKMT	5.0677	3.64213	6.22865	3.48073	2.67273	2.74249	3.31954	2.67159	4.4218
CAMLG	45.6093	49.096	51.5594	50.0126	46.9637	53.2574	51.2157	48.237	49.3031
CAMSAP1	40.4047	38.7523	34.9497	47.631	46.3909	44.676	49.7931	47.0496	45.9867
CAMSAP2	182.437	165.207	166.443	262.337	253.336	247.266	270.305	265.378	238.556
CAMTA1	41.6373	46.1823	44.9847	56.0581	56.3182	58.2115	64.9681	54.4707	59.4732
CAMTA1.DT	0.136965	0	0	0.366393	0.381818	0	0	0.296843	0.22109
CAMTA2	55.1969	48.3675	44.9847	43.2343	39.7091	39.7219	30.8243	38.8864	38.6908
CAND1	295.296	299.529	300.706	256.841	245.127	257.263	239.007	275.47	239.883
CAND2	2.7393	2.62234	3.11433	0.549589	0.763637	0.442337	1.42266	0.296843	0.44218
CANT1	84.7813	84.6432	81.6646	123.657	127.718	123.058	128.514	114.73	132.433
CANX	1153.52	1106.04	1173.41	1104.31	1071.38	1070.99	1227.75	1255.79	1199.41
CAP1	662.636	677.291	613.522	682.589	690.137	697.477	636.877	638.212	638.951
CAP2	122.721	114.217	116.614	32.7921	33.9818	35.1216	24.6594	22.8569	24.3199
CAPG	22.0514	21.8528	20.7622	30.4106	26.9182	26.0094	27.0305	28.4969	36.9221
CAPN1	142.033	161.274	140.837	144.175	144.136	136.151	141.317	134.025	145.256
CAPN10	6.30039	8.74112	12.1113	9.52621	8.4	7.78513	11.3813	8.3116	8.84361
CAPN10.DT	3.69805	1.89391	3.11433	1.28237	1.14546	1.23854	2.3711	1.48422	0.884361
CAPN11	0	0	0	0.366393	0.763637	0.442337	2.3711	0.890529	1.10545
CAPN12	0.54786	0.145685	0	0.732785	0.190909	0.442337	0	0.148422	0.44218
CAPN14	0.136965	0.437056	0.692073	0.366393	0.190909	0.265402	0	0.296843	0.22109
CAPN15	22.8731	24.1838	26.6448	29.3114	31.1182	25.8325	29.4016	24.3411	28.0784
CAPN2	639.9	654.127	648.818	838.856	831.409	866.715	824.668	838.582	827.319
CAPN3	4.10895	4.51625	5.19054	4.03032	3.24546	3.45023	1.89688	1.33579	1.76872
CAPN5	33.4194	27.5345	22.8384	44.6999	46.7727	50.8687	68.7619	56.2518	59.6943
CAPN7	69.9891	61.9163	67.4771	61.9203	67.3909	70.8624	73.0298	75.5465	70.0856
CAPNS1	283.38	286.417	272.677	226.431	248.373	228.954	226.203	201.408	223.522
CAPNS2	0.27393	0	0	0	0.190909	0.0884674	0	0.593686	0
CAPRIN1	530.328	527.09	526.321	503.057	514.691	523.55	424.427	459.216	438.864
CAPRIN2	58.3471	55.2147	52.9436	54.0429	53.0727	53.3458	62.1228	54.4707	57.0413
CAPS	1.64358	1.60254	0.692073	0.183196	0.381818	0.707739	1.89688	1.03895	0.884361
CAPS2	3.28716	3.20508	6.57469	1.09918	1.33636	1.06161	1.42266	1.33579	1.10545
CAPSL	0.136965	0	0.346036	0.183196	0.381818	0.0884674	0	0.148422	0
CAPZA1	513.892	495.767	507.981	500.675	506.1	516.65	504.096	526.154	506.296
CAPZA2	300.364	313.515	312.471	320.96	339.627	357.32	330.531	334.097	331.414
CAPZB	328.579	335.513	289.286	328.471	300.109	322.729	308.243	269.533	293.829
CARD10	4.79377	5.9731	4.49847	1.09918	2.1	2.12322	2.3711	1.48422	1.54763
CARD14	1.36965	0.728427	0.346036	0.915981	0.954546	1.15008	0.94844	0.742108	0.44218
CARD16	5.61556	6.26447	3.46036	3.48073	3.43637	4.0695	3.79376	2.37474	1.54763
CARD19	25.6124	27.3888	25.2607	38.288	36.8455	39.1026	55.4837	53.1349	52.8405
CARD6	18.0794	17.7736	16.2637	30.4106	24.0546	25.8325	24.1852	25.3801	29.1839
CARD8	29.1735	29.5741	29.0671	22.8995	30.1636	25.0363	30.3501	28.9422	29.8472
CARD8.AS1	2.19144	1.31117	2.42225	3.84712	3.81818	2.74249	1.89688	1.63264	4.64289
CARD9	2.19144	2.62234	1.38415	0.915981	1.52727	1.41548	1.42266	2.22632	1.76872
CARF	8.90272	11.6548	13.4954	8.24383	7.82728	6.54659	6.63908	8.3116	8.18034
CARHSP1	22.0514	24.1838	24.2225	17.9532	18.1364	17.1627	19.443	17.2169	21.0036
CARM1	76.8373	71.5315	85.471	77.3088	70.8273	70.3316	62.1228	57.4391	63.4529
CARMIL1	19.9969	24.7665	21.8003	19.602	20.8091	20.0821	15.6493	19.4432	18.5716
CARMIL2	0.684825	0.291371	0.346036	0	0.572728	0.35387	0.94844	0.148422	0.22109
CARMN	2.3284	3.35076	1.38415	0	0	0.35387	0	0	0
CARNMT1	42.0482	40.2092	39.1021	82.6215	83.8091	87.5827	76.8236	89.3497	83.7932
CARNS1	0	0.145685	0	0.915981	1.52727	1.50395	2.84532	1.92948	2.2109
CARS	4.10895	3.64213	3.46036	2.38155	3.05455	2.21168	2.84532	3.11685	2.43199
CARS2	42.7331	43.8513	47.753	86.6518	75.7909	84.221	88.2049	86.975	88.6571
CASC1	0.82179	0.291371	0.346036	0	0	0	0	0	0
CASC10	2.87626	3.35076	3.11433	1.09918	1.33636	0.884674	1.42266	1.18737	1.54763
CASC2	1.78054	1.60254	1.38415	0.732785	0.381818	0.265402	0	0.296843	0
CASC3	53.5533	55.3604	50.1753	54.9589	58.2273	56.5307	58.8032	48.3854	55.4936
CASC4	309.678	304.919	343.614	250.246	233.482	259.209	275.522	290.461	282.553
CASC8	0.684825	0.145685	0.346036	0	0.190909	0	0	0	0
CASD1	49.4443	43.4142	38.064	38.4712	39.5182	45.9146	27.0305	27.9032	29.405
CASK	41.3634	42.8315	35.2957	31.1434	23.4818	31.4059	38.4118	45.7138	50.8507
CASKIN2	10.4093	9.46955	10.3811	5.86228	6.3	6.10425	7.1133	6.08528	4.64289
CASP1	16.7097	16.6081	19.032	7.69424	7.25455	10.6161	4.7422	6.53055	6.6327
CASP10	2.05447	2.62234	2.76829	3.11434	3.62727	2.65402	2.3711	2.67159	2.2109
CASP12	0.136965	0.145685	0	0.183196	0.381818	0.176935	0	0	0.22109
CASP2	34.3782	34.6731	35.6417	29.861	30.7364	26.5402	36.0407	28.0517	28.7417
CASP3	185.04	177.882	213.85	128.787	146.427	142.256	136.575	120.815	120.052
CASP4	58.2101	59.2939	56.4039	74.9273	75.7909	73.8703	66.3908	82.5224	80.0346
CASP6	13.4226	14.4228	15.9177	9.52621	6.87273	7.8736	13.2782	9.79582	10.1701
CASP7	39.035	39.4807	40.1402	40.8528	45.0546	45.1184	48.3704	48.3854	44.8813
CASP8	24.6537	23.8924	17.6479	34.2577	25.0091	31.3175	30.3501	32.059	28.0784
CASP8AP2	52.3206	49.6787	61.2484	45.2495	33.2182	42.2874	35.5665	34.8791	38.0275
CASP9	9.58755	8.88681	11.7652	6.22867	8.59091	8.75827	15.175	14.1	13.4865
CASS4	2.87626	1.31117	1.38415	0.183196	0.190909	0.530804	0.47422	0.890529	0.44218
CAST	391.309	399.469	366.452	395.521	407.4	411.285	461.89	478.511	462.521
CASTOR1	3.69805	4.22488	4.84451	3.66393	3.62727	2.12322	4.7422	4.89791	5.74834
CASTOR2	12.3268	12.2376	11.0732	19.4188	18.1364	15.3933	28.4532	22.5601	21.4457
CASTOR3	5.20467	8.59544	8.30487	6.77826	5.15455	5.13111	5.69064	8.75687	7.51706
CASZ1	0.27393	0	0.346036	0.183196	0	0	0	0	0.22109
CAT	96.2863	111.158	103.119	71.8129	75.0273	75.9935	90.1018	84.155	90.2048
CATSPER1	1.64358	1.31117	2.42225	0.549589	0.190909	0.796207	0.94844	1.03895	0.66327
CATSPER2P1	0.27393	0.291371	0.346036	0.183196	0.572728	0.0884674	0	0.148422	0
CATSPER3	0.27393	0.582741	0	0	0.763637	0.176935	0.94844	0	0.44218
CATSPERE	1.78054	2.03959	1.73018	5.31269	5.53637	5.13111	8.06174	6.67897	8.18034
CATSPERG	0.410895	0	0	0	0.381818	0	0.47422	0.148422	0
CAV1	3419.47	3418.36	3575.25	966.91	970.391	918.645	633.083	639.103	641.825
CAV2	426.098	427.295	482.721	199.867	198.355	202.679	205.811	213.875	209.372
CAVIN1	1012.99	1051.56	1020.46	498.843	474.791	479.493	455.725	428.641	465.395
CAVIN2	6.02646	4.22488	5.88262	0.732785	0.572728	0.796207	0	0	0
CAVIN3	56.1556	55.5061	61.9405	42.5015	50.4	48.9225	79.6689	78.8118	77.1605
CAVIN4	2.87626	4.22488	1.38415	3.84712	3.81818	2.91942	0.94844	2.82001	2.65308
CBARP	2.05447	2.91371	2.76829	2.56475	4.58182	2.74249	3.31954	4.74949	5.08507
CBFA2T2	21.2296	17.1909	18.3399	20.1516	17.9455	20.7898	23.711	20.9274	22.9934
CBFB	122.995	120.19	118.344	172.204	186.136	188.082	191.585	207.345	184.831
CBL	108.202	108.973	105.541	202.249	201.027	191.443	216.718	196.807	200.529
CBLB	37.2545	37.5868	40.8323	48.547	49.6364	43.6144	53.1126	56.4002	57.0413
CBLL1	51.2249	46.765	41.5244	45.9823	45.8182	49.6302	45.0509	43.1907	34.0479
CBLN3	6.16342	5.82741	3.8064	4.21351	4.39091	4.0695	6.63908	4.89791	4.86398
CBLN4	0	0	0	0.732785	0.572728	0.530804	0	0.148422	0.22109
CBR1	61.7712	71.3858	69.5533	72.1793	67.0091	78.2936	81.5658	97.8098	89.5415
CBR3	7.12218	7.42995	7.26676	4.7631	5.72728	5.83885	7.58752	7.27265	9.28579
CBR3.AS1	2.05447	1.74822	1.03811	0.732785	0.954546	0.707739	2.3711	1.92948	0.66327
CBR4	23.421	24.3295	25.2607	25.2811	27.6818	26.7172	19.443	24.3411	25.8675
CBWD1	4.10895	4.9533	4.49847	3.29753	3.62727	3.71563	2.3711	4.45265	4.20071
CBWD2	7.53307	9.32386	6.22865	8.42703	9.16364	7.34279	7.58752	9.05371	6.6327
CBWD5	3.42412	3.49645	3.11433	1.64877	2.86364	1.94628	1.42266	2.37474	1.76872
CBWD6	0.958755	0.145685	0.692073	0.183196	0	0.442337	0.47422	0.445265	0.884361
CBX1	100.532	104.893	109.001	63.0195	65.4818	72.8971	49.3189	53.4317	54.8304
CBX2	1.36965	1.31117	0.692073	0	0.572728	0.442337	0.94844	0.890529	1.54763
CBX3	262.014	284.086	318.353	300.625	305.836	321.137	281.212	297.288	285.427
CBX3P2	0.410895	0	0.346036	0.183196	0.190909	0.265402	0	0	0
CBX4	17.3945	14.4228	14.5335	21.6172	21.3818	17.605	17.5461	18.8495	24.7621
CBX5	268.725	239.07	255.721	186.86	162.273	173.396	163.132	169.201	159.406
CBX6	125.186	129.514	133.57	112.482	100.8	102.357	123.771	120.37	121.821
CBX7	6.84825	8.44975	9.68902	4.57991	7.25455	6.10425	6.63908	5.93686	7.29597
CBX8	3.83502	2.91371	2.76829	3.48073	3.62727	3.62716	5.21642	3.85896	3.97962
CBY1	16.2988	20.9787	17.3018	8.61022	9.35455	9.37754	8.53596	8.16318	8.62252
CC2D1A	14.5183	13.6944	15.5716	6.41187	8.4	11.0584	12.8039	10.0927	13.7076
CC2D1B	33.4194	29.8655	25.2607	26.9298	27.4909	26.8941	33.1954	24.4895	36.0377
CC2D2A	24.5167	20.1046	15.9177	7.32785	3.81818	6.90046	4.26798	5.19475	4.20071
CC2D2B	0.27393	0.145685	0	0	0.190909	0.176935	0.94844	0.445265	0.22109
CCAR1	172.713	174.968	167.482	161.579	144.9	156.676	136.101	153.616	149.678
CCAR2	48.8965	47.6391	46.3689	49.0966	44.6727	43.7029	44.5767	43.6359	49.5242
CCBE1	29.3105	25.932	33.2195	8.79342	7.44546	6.72352	5.69064	2.67159	1.76872
CCDC102A	5.0677	3.05939	5.53658	3.48073	3.24546	2.38862	4.7422	2.67159	2.65308
CCDC102B	2.46537	2.18528	3.8064	2.56475	2.1	2.03475	1.42266	2.22632	1.76872
CCDC103	0.82179	0.728427	1.03811	0.549589	1.33636	0.884674	1.42266	1.03895	0.44218
CCDC106	3.56109	5.82741	4.15244	2.38155	2.29091	1.85782	3.31954	2.37474	3.97962
CCDC107	1.36965	1.74822	1.38415	1.09918	2.1	0.884674	1.89688	1.92948	1.76872
CCDC110	0.136965	0	0.692073	0	0.190909	0.0884674	0	0.296843	0
CCDC112	17.6685	21.5614	17.6479	8.79342	11.0727	10.2622	9.4844	12.0221	10.1701
CCDC113	2.3284	2.18528	2.42225	0.549589	0.381818	0.707739	0.94844	0.296843	0.44218
CCDC114	0.27393	0.145685	0	0	0.190909	0	0	0.296843	0.22109
CCDC115	20.9556	16.6081	19.378	12.2741	13.5546	10.793	11.8555	15.139	14.5919
CCDC116	0.136965	0.145685	0	0	0.190909	0.442337	0.47422	0	0
CCDC117	48.4856	43.4142	51.2134	51.6613	50.2091	56.7076	36.5149	49.1275	51.0718
CCDC12	10.4093	11.2178	12.4573	10.8086	10.1182	11.8546	16.1235	12.6158	13.9287
CCDC120	0.958755	1.16548	2.07622	0.915981	0.954546	0.35387	0.94844	0.296843	0.22109
CCDC121	1.09572	0.437056	1.03811	1.09918	1.33636	1.06161	2.84532	1.78106	1.54763
CCDC122	18.0794	18.6477	23.1844	10.8086	11.6455	10.8815	13.7524	14.9906	10.8334
CCDC124	12.0529	10.0523	16.9558	6.22867	6.3	7.43126	9.95861	6.67897	9.28579
CCDC125	0.136965	0	0.346036	0.183196	0.190909	0.0884674	0.94844	0.148422	0
CCDC126	12.3268	8.01269	12.1113	12.6405	11.6455	11.8546	11.3813	13.0611	11.7178
CCDC127	15.3401	12.3833	15.2256	12.6405	10.5	12.0316	14.7008	14.8422	11.7178
CCDC130	10.9572	11.3635	9.34298	10.0758	10.5	11.2354	10.9071	8.75687	12.16
CCDC134	1.23268	2.03959	1.73018	0.915981	0.763637	1.85782	1.42266	1.78106	2.43199
CCDC136	10.8202	13.8401	10.0351	10.6254	10.5	12.297	14.2266	10.3895	13.2654
CCDC137	22.7362	21.1244	18.3399	19.2356	16.8	18.2243	9.4844	13.5064	17.0239
CCDC138	3.28716	2.91371	2.42225	2.74794	1.71818	2.12322	1.42266	1.33579	2.2109
CCDC14	269.41	256.989	245.34	48.7302	50.7818	56.6191	42.6798	54.0254	53.7249
CCDC142	8.90272	8.30407	5.19054	8.61022	12.0273	10.793	12.8039	17.2169	15.0341
CCDC144B	8.90272	10.198	11.4192	7.14465	6.10909	5.13111	4.26798	3.85896	5.96943
CCDC144CP	0.27393	0.437056	0	0.183196	0.190909	0.0884674	0	0.296843	0.22109
CCDC144NL.AS1	0.136965	0.582741	0.346036	0.183196	0.190909	0.265402	0.47422	0.445265	0.44218
CCDC146	4.10895	3.49645	2.76829	2.19836	1.14546	1.15008	1.42266	1.48422	3.75853
CCDC148	0.136965	0.437056	2.07622	0	0	0	0	0	0.22109
CCDC149	13.1486	12.3833	13.1494	14.8389	13.1727	13.3586	20.3914	21.6695	21.0036
CCDC15	5.61556	5.68173	10.3811	3.48073	4.77273	5.13111	5.21642	3.56212	5.74834
CCDC150	3.01323	3.49645	2.76829	0.915981	0.954546	1.23854	0.47422	0.445265	0.22109
CCDC151	0.410895	0.291371	0	0.732785	0.190909	0.619272	1.42266	0.445265	0.66327
CCDC152	3.28716	2.18528	5.88262	1.28237	0.954546	0.619272	0.94844	0.593686	0.44218
CCDC153	0.136965	0.582741	0	0	0	0	0	0.296843	0
CCDC157	1.36965	1.60254	3.11433	0.549589	1.33636	1.41548	1.42266	2.0779	2.87417
CCDC158	1.09572	0.874112	0	0.183196	0.190909	0.0884674	0	0.890529	0.22109
CCDC159	3.15019	2.03959	1.38415	2.19836	0.954546	0.973141	2.84532	1.78106	2.2109
CCDC162P	0.54786	0	0.346036	0.183196	0.190909	0.176935	0.47422	0.148422	0.44218
CCDC163	0.136965	0.582741	1.03811	0.366393	0.572728	0.796207	0.47422	0.890529	0.66327
CCDC167	6.02646	7.42995	6.92073	6.22867	4.58182	6.19272	7.58752	6.67897	8.40143
CCDC168	0.410895	0.728427	0.692073	0.732785	1.33636	1.32701	0.94844	0.742108	1.76872
CCDC17	0.27393	0.291371	0.692073	0.732785	0.763637	0.265402	0	0.296843	0.22109
CCDC170	1.36965	1.60254	0.692073	0	0.190909	0.176935	0	0.296843	0.44218
CCDC171	2.60233	3.05939	3.46036	1.46557	2.1	2.03475	2.3711	3.71054	3.31635
CCDC173	0.82179	0.874112	0.692073	0.366393	0.190909	0.0884674	0	0.148422	0
CCDC174	16.0249	17.3366	15.2256	12.091	11.8364	12.2085	13.7524	13.2095	14.3709
CCDC18	20.8187	21.8528	23.1844	14.2893	14.5091	15.5703	15.175	14.5453	17.6872
CCDC18.AS1	9.99844	12.8203	9.68902	9.52621	8.01819	10.6161	10.9071	9.05371	7.29597
CCDC181	0.82179	0.728427	1.03811	1.09918	0.572728	0.796207	0	0.445265	0
CCDC183	0.684825	0.874112	1.03811	0.183196	0.763637	0	0.47422	0.445265	0.44218
CCDC183.AS1	0.958755	0.728427	1.38415	0.366393	0.763637	0.619272	0.94844	1.18737	0.66327
CCDC184	0.27393	0.145685	0.346036	1.09918	0	0.265402	1.42266	1.03895	0.884361
CCDC186	89.986	86.6828	85.471	49.6462	54.6	59.804	55.4837	48.237	55.2725
CCDC188	2.46537	1.74822	2.07622	2.19836	2.29091	2.91942	3.31954	2.82001	1.98981
CCDC190	1.50661	1.45685	0.692073	0	0	0	0	0	0
CCDC191	6.16342	4.80762	8.65091	1.83196	1.52727	3.00789	1.42266	1.78106	1.76872
CCDC200	1.78054	0.874112	0.346036	0.366393	0.190909	0.707739	0.47422	1.03895	0.22109
CCDC22	4.38288	6.11878	4.84451	7.51105	5.34546	6.10425	5.69064	7.27265	7.51706
CCDC24	3.97198	3.05939	1.73018	2.38155	2.67273	1.76935	2.84532	1.48422	1.76872
CCDC25	56.7035	56.3802	57.096	41.7687	41.6182	42.4643	38.4118	40.0738	34.4901
CCDC28A	8.62879	9.76092	11.7652	10.0758	11.8364	12.7393	4.7422	7.42108	9.0647
CCDC28B	4.65681	4.80762	5.53658	1.83196	0.954546	1.41548	2.84532	1.63264	2.87417
CCDC3	0.27393	0.291371	0.692073	0	0	0.0884674	0.47422	0.148422	0.44218
CCDC30	0.54786	0.874112	1.03811	0.183196	0.572728	0.35387	1.42266	0.296843	0.44218
CCDC32	12.1899	16.1711	12.4573	12.6405	13.1727	11.6777	9.95861	13.5064	11.9389
CCDC34	13.4226	12.966	12.8033	8.24383	7.44546	6.72352	2.84532	6.08528	3.75853
CCDC39	14.1074	12.966	17.3018	10.0758	8.97273	11.5008	8.06174	11.5769	7.95925
CCDC40	2.46537	3.35076	3.11433	1.64877	2.1	1.15008	3.79376	3.11685	4.20071
CCDC43	45.3354	40.6462	41.1783	34.8073	33.6	34.5907	30.3501	32.2075	32.0581
CCDC47	189.422	185.312	192.742	147.473	170.1	165.08	157.441	167.419	164.491
CCDC50	270.095	267.187	262.296	146.923	146.427	151.279	149.379	145.008	147.909
CCDC51	7.53307	7.28427	8.30487	5.86228	5.72728	6.01578	8.06174	4.74949	5.08507
CCDC57	14.7922	13.5487	12.8033	13.1901	13.5546	16.0126	11.8555	11.1316	11.2756
CCDC58	10.4093	9.46955	11.4192	9.34301	9.54546	8.05053	6.16486	8.01476	11.2756
CCDC59	28.4887	26.6604	28.721	28.7618	25.7727	28.8404	20.8657	21.5211	20.7825
CCDC6	129.021	122.23	130.456	98.3764	97.5546	95.5448	99.1119	101.223	97.5008
CCDC61	3.28716	2.62234	1.38415	2.01516	2.1	1.59241	0.47422	1.48422	1.32654
CCDC62	0.27393	1.0198	0.692073	1.28237	0.572728	2.65402	3.31954	1.33579	1.54763
CCDC65	1.91751	1.16548	3.11433	2.01516	1.71818	1.32701	1.42266	1.03895	1.32654
CCDC66	15.8879	15.734	13.1494	12.8237	8.97273	13.447	9.95861	12.319	9.50688
CCDC68	27.393	24.7665	20.7622	14.2893	15.6546	12.7393	40.7829	32.9496	30.7315
CCDC69	1.36965	0.874112	1.03811	1.83196	1.33636	0.884674	1.42266	1.18737	2.2109
CCDC7	11.642	10.7807	11.7652	7.14465	9.73637	10.7046	10.4328	11.8737	10.1701
CCDC71	8.76576	10.7807	12.1113	6.59507	7.82728	7.16586	5.21642	7.5695	7.07488
CCDC71L	266.808	271.849	265.41	269.482	268.227	255.051	250.388	260.777	252.264
CCDC73	0.82179	1.16548	0.692073	0.366393	1.33636	1.23854	0.47422	0.742108	1.32654
CCDC74A	1.64358	1.74822	1.03811	1.09918	1.33636	1.32701	3.31954	2.52317	2.87417
CCDC74B	1.23268	0.582741	0.346036	0.183196	0	0.265402	0	0.296843	0.884361
CCDC77	5.75253	6.26447	5.19054	5.86228	4.00909	6.01578	6.63908	5.93686	7.51706
CCDC78	0.958755	1.0198	0	1.46557	1.33636	0.973141	2.84532	1.33579	1.76872
CCDC8	3.69805	2.76802	2.07622	2.19836	2.1	2.56555	1.89688	2.37474	2.65308
CCDC80	140.8	139.13	125.265	24.3651	24.8182	26.1863	28.4532	27.7548	34.0479
CCDC81	9.72451	8.88681	8.65091	0.915981	0	0.707739	0	0.742108	0
CCDC82	68.3455	72.9884	74.3978	87.0182	75.2182	80.5053	75.8752	83.2645	68.0958
CCDC84	13.9704	10.0523	11.4192	9.7094	9.35455	10.97	13.7524	10.5379	13.2654
CCDC85A	1.23268	0.437056	0.346036	0	0	0	0	0	0
CCDC85B	36.5696	45.7452	42.9085	26.0139	23.4818	22.4707	19.443	21.2243	22.109
CCDC85C	21.7774	22.8726	21.1082	10.9918	8.59091	8.05053	7.58752	7.27265	7.29597
CCDC86	16.1619	15.1513	14.1875	24.7315	21.3818	22.3822	23.2368	17.8106	16.8029
CCDC87	0.410895	0.145685	0.346036	0.732785	0	0.530804	0	0.593686	0.66327
CCDC88A	258.864	265.293	284.096	367.675	348.982	351.569	280.738	289.867	292.502
CCDC88B	0.410895	0.291371	0	0	0.381818	0.176935	0	0	0
CCDC89	4.38288	3.64213	3.46036	2.56475	1.52727	3.5387	2.84532	2.22632	3.75853
CCDC9	6.43735	5.09899	5.19054	6.96146	8.59091	6.19272	6.16486	4.45265	7.29597
CCDC90B	71.0848	71.8229	74.7438	53.4933	48.8727	57.9461	48.8446	54.1739	54.3882
CCDC91	32.3237	32.1965	34.6036	32.2425	30.7364	34.3253	36.0407	33.5433	30.0683
CCDC92	2.87626	1.89391	3.11433	2.38155	4.00909	2.74249	1.42266	2.82001	3.09526
CCDC93	62.7299	57.4	54.6737	63.0195	62.2364	64.8466	70.1845	63.9697	66.9903
CCDC96	2.46537	1.74822	2.42225	0.915981	0.954546	1.41548	0.94844	0.148422	1.54763
CCDC97	9.17665	11.2178	8.30487	8.97662	6.10909	9.73141	11.8555	7.12423	10.1701
CCDC9B	67.5237	68.9092	68.1692	33.8913	33.6	36.8909	47.422	35.3243	39.354
CCIN	0.410895	0	0	0.366393	0.381818	0.35387	0.94844	1.33579	0.44218
CCL2	165.454	165.207	191.704	4.9463	5.53637	4.86571	3.79376	4.00738	3.97962
CCL20	0	0	0.346036	11.7246	9.54546	10.6161	6.63908	7.42108	6.6327
CCL26	0.27393	0.437056	0.346036	0.549589	0.381818	0.265402	0.47422	0	0
CCL28	0.684825	0.291371	1.38415	0.183196	0.572728	0.35387	0	0	0
CCL7	0.684825	0.874112	1.03811	1.28237	1.71818	1.41548	0.94844	2.22632	1.76872
CCM2	36.7066	33.3619	37.3719	39.204	40.0909	37.0678	39.8345	43.4875	43.3337
CCNA2	55.0599	57.6914	60.5564	11.175	8.78182	12.4739	2.3711	3.71054	5.52725
CCNB1	64.2366	70.366	69.2073	22.3499	23.8636	26.3633	8.06174	5.34317	8.40143
CCNB1IP1	27.53	29.7198	27.3369	14.6557	16.8	15.3933	8.06174	11.4285	7.95925
CCNB2	26.0233	26.0777	26.6448	7.69424	7.63637	6.19272	0.47422	0.593686	1.98981
CCNB3	0	0.291371	0.692073	0	0	0.0884674	0.47422	0	0.22109
CCNC	127.788	130.097	144.989	92.3309	92.7819	92.8908	70.1845	73.6171	66.9903
CCND1	2651.91	2575.13	2628.15	2248.55	2163.38	2187.62	1100.19	1058.39	1059.69
CCND2	4.79377	3.9335	6.92073	2.19836	1.52727	1.76935	0.47422	0.593686	0.44218
CCND3	56.0187	61.9163	53.2896	44.6999	45.0546	46.2684	48.8446	42.3001	54.3882
CCNDBP1	62.456	63.3731	65.0548	69.4314	80.3728	78.6475	67.3392	63.9697	61.4631
CCNE1	8.90272	7.13858	6.92073	8.42703	6.87273	6.81199	2.84532	4.45265	5.52725
CCNE2	16.5728	17.7736	14.1875	3.48073	4.39091	5.21958	0.94844	1.03895	1.54763
CCNF	13.9704	14.5685	9.68902	6.22867	6.3	5.21958	2.3711	2.52317	3.09526
CCNG1	444.999	466.485	469.225	211.225	230.427	228.954	209.605	219.219	216.005
CCNG2	75.4677	73.7168	82.7027	102.407	104.045	94.2178	102.431	115.62	101.923
CCNH	48.8965	41.8117	48.099	43.6007	37.9909	44.0568	41.7313	47.7917	43.1126
CCNI	226.266	224.355	192.742	247.498	232.146	239.835	259.398	243.263	248.948
CCNJ	9.86148	10.7807	16.9558	15.9381	15.8455	17.0742	20.3914	17.8106	15.6974
CCNK	60.2646	65.267	52.9436	56.2412	50.2091	51.7534	50.7415	47.0496	43.9969
CCNL1	114.366	112.615	121.805	93.7965	106.527	98.7296	104.803	96.0287	96.3953
CCNL2	257.22	252.327	239.111	201.516	204.273	221.699	237.11	200.963	221.975
CCNO	0.684825	0.437056	0.346036	0.549589	1.14546	0.176935	0	0.742108	1.32654
CCNQ	14.5183	21.7071	18.686	14.6557	15.8455	14.4202	9.01018	9.94424	11.2756
CCNT1	89.5751	86.6828	91.0076	115.78	125.618	115.804	117.606	120.667	109.661
CCNT2	78.07	77.3589	75.782	80.4232	81.5182	77.5859	82.04	79.4055	80.0346
CCNT2.AS1	0.958755	1.60254	2.76829	1.09918	0.572728	0.442337	0.94844	1.78106	0.44218
CCNY	118.201	114.509	120.421	99.2924	88.9637	99.9682	82.5142	90.2403	92.8579
CCNYL1	67.5237	70.8031	71.2835	60.2716	63.9546	62.281	54.5353	53.5802	53.2827
CCNYL2	0.684825	0.291371	0.692073	0.183196	0.190909	0.265402	0	0.296843	0.44218
CCP110	53.0054	47.9305	47.753	35.3569	28.4455	31.229	21.8141	26.419	22.109
CCPG1	29.8584	25.932	38.064	21.9836	24.0546	22.3822	46.4735	41.558	41.3439
CCR10	0.54786	1.0198	1.38415	0.549589	0.763637	0.619272	0.47422	0.593686	0.44218
CCR7	0.410895	0.582741	0.346036	0.366393	0.190909	0.0884674	0.47422	0.148422	0.22109
CCS	10.6833	9.9066	5.53658	7.14465	8.78182	7.43126	11.3813	6.82739	8.18034
CCSAP	21.5035	27.8259	28.375	15.5717	15.0818	16.4549	19.9172	17.5137	13.0443
CCSER2	100.532	102.854	103.119	85.5526	83.0455	82.0977	83.9369	71.2423	61.9052
CCT2	234.758	224.21	222.501	255.559	247.418	267.879	226.203	239.552	231.039
CCT3	263.794	254.512	242.225	249.696	241.882	255.14	229.522	233.022	242.536
CCT4	260.233	268.352	260.219	270.947	266.509	288.934	218.141	241.333	226.175
CCT5	235.169	246.791	251.568	211.775	208.091	230.015	183.523	189.237	187.706
CCT6A	260.781	263.982	274.407	254.643	258.682	272.745	245.172	249.051	240.767
CCT6B	2.3284	0.874112	2.07622	0.915981	0.572728	1.41548	0.47422	1.48422	0.44218
CCT6P1	3.42412	3.35076	2.76829	3.84712	2.1	2.91942	0	2.82001	1.54763
CCT6P3	3.15019	2.33097	2.07622	1.83196	1.90909	1.76935	1.42266	1.18737	1.54763
CCT7	158.058	167.538	154.332	174.036	163.609	175.696	152.699	155.249	150.562
CCT8	247.77	242.566	247.762	236.69	231.764	248.151	211.502	215.063	198.318
CCZ1	13.1486	12.2376	14.5335	15.3885	13.3636	13.624	10.9071	12.6158	12.16
CCZ1B	14.6552	15.4426	12.8033	13.3733	10.8818	12.2085	11.8555	12.6158	14.5919
CCZ1P.OR7E38P	4.24591	4.66193	3.8064	2.93114	4.00909	3.00789	2.3711	2.67159	5.08507
CD109	514.166	531.606	562.655	694.497	708.464	711.809	448.612	437.25	408.575
CD14	0.27393	0.291371	0.346036	0.183196	0.190909	0.0884674	0	0.148422	0.22109
CD151	270.643	279.716	252.607	276.26	260.4	245.585	323.892	303.374	331.193
CD160	1.09572	1.16548	0.692073	0.549589	0.572728	1.06161	0.94844	0.742108	0.66327
CD163L1	6.16342	4.66193	5.19054	8.42703	8.20909	10.6161	9.01018	7.71792	10.3912
CD164	753.718	742.267	851.595	898.211	919.228	894.317	941.326	1000.06	913.544
CD177	0.958755	0.582741	0.346036	0.366393	0.763637	0.530804	0.47422	0.445265	0.22109
CD226	0.410895	0.291371	0	0.183196	0.381818	0.0884674	0.47422	0.148422	0.44218
CD248	143.676	155.883	152.256	99.4756	86.8637	92.2715	194.43	169.201	185.937
CD27	0.27393	0.145685	0.346036	0.183196	0.190909	0.0884674	0.47422	0	0.22109
CD27.AS1	12.8747	11.9462	7.95884	4.03032	3.81818	4.0695	3.79376	2.96843	4.86398
CD274	61.9081	67.8894	57.442	140.145	148.146	131.728	79.6689	61.2981	68.3169
CD276	98.4778	102.271	107.271	169.09	170.673	134.382	173.09	176.473	197.433
CD2AP	77.6591	76.1934	81.3185	86.835	95.4546	98.7296	79.6689	85.7876	77.1605
CD2BP2	34.9261	35.4015	27.6829	30.777	30.3546	29.8135	35.5665	31.6138	27.1941
CD302	0.82179	0.582741	1.03811	0.549589	0.572728	0.35387	0.47422	0.445265	0
CD320	13.4226	14.4228	11.7652	12.6405	13.1727	12.0316	10.9071	12.9127	12.8232
CD34	0.54786	0.437056	0.692073	0	0	0.0884674	0	0	0
CD36	2.05447	1.31117	0.346036	0.732785	0.190909	0.442337	0.47422	0.445265	0
CD37	0.27393	0.291371	0	0.732785	0	0.176935	0.47422	0.445265	1.54763
CD3EAP	2.3284	3.20508	5.88262	4.03032	3.05455	3.98103	4.7422	2.52317	1.98981
CD4	0.27393	0	0.692073	0.183196	0	0	0	0	0
CD40	0.82179	0.291371	0.346036	0	0	0.35387	0	0.296843	0.22109
CD44	2330.32	2203.35	2161.69	2004.53	1970.95	1924.17	2253.02	2209.4	2146.34
[truncated: 13,395 more rows]

## Sheet: Supplementary Table 1B
GeneID	baseMean	log2FoldChange	lfcSE	stat	pvalue	padj
A1BG	43.2154	0.299525	0.258081	7.57273	0.0226779	0.0461758
A1BG.AS1	10.127	0.117871	0.537029	0.268712	0.874279	0.911561
A2M	11.6016	-2.73437	0.609931	40.6101	1.51928e-09	7.08237e-09
A4GALT	24.4649	0.846263	0.347109	10.3264	0.00572332	0.0131952
A4GNT	1.58325	-1.53702	1.49977	1.18029	0.554247	0.665867
AAAS	87.218	-0.349494	0.187085	4.89413	0.0865472	0.149259
AACS	145.006	-0.459147	0.153913	9.43323	0.0089454	0.0198778
AADAT	56.5091	0.808512	0.239938	13.4795	0.00118294	0.00310543
AAGAB	287.769	-0.255761	0.103885	9.90038	0.00708207	0.015993
AAK1	855.475	-0.223218	0.0646355	21.4683	2.17877e-05	7.18013e-05
AAMDC	33.9465	-1.4449	0.317238	24.6746	4.38511e-06	1.55917e-05
AAMP	323.935	0.569345	0.101597	46.1939	9.31354e-11	4.67122e-10
AAR2	140.812	-0.441575	0.15231	10.1528	0.0062422	0.0142545
AARD	0.887259	-1.54429	1.88427	0.825059	0.661974	0.753688
AARS	283.167	-0.791725	0.114397	52.1027	4.85345e-12	2.60286e-11
AARS2	48.9581	-0.466218	0.263997	6.12242	0.0468309	0.0877474
AARSD1	0.86018	-1.63764	1.92231	0.975559	0.613988	0.715111
AASDH	72.3087	-0.920746	0.208222	25.9915	2.26995e-06	8.2668e-06
AASDHPPT	575.797	-0.328809	0.0785495	18.9083	7.83651e-05	0.000242199
AASS	206.749	0.00525912	0.12116	2.228	0.328243	0.449573
AATK	1.22759	-1.20033	1.57738	2.22541	0.32867	0.449947
ABALON	1.9172	3.40255	1.59206	5.35641	0.0686862	0.122213
ABAT	27.3424	-1.52871	0.357952	30.4158	2.48482e-07	9.83999e-07
ABCA1	847.086	3.37906	0.0868887	1729.39	0	0
ABCA10	2.15616	-0.869088	1.16714	5.88433	0.0527514	0.097163
ABCA11P	28.1294	-0.237273	0.320774	1.07983	0.582797	0.689249
ABCA12	0.921938	-1.68827	3.1042	1.91318	0.384201	0.507242
ABCA13	8.24437	5.01817	1.32215	49.7937	1.53973e-11	8.05403e-11
ABCA2	198.959	0.744035	0.139175	29.1459	4.68866e-07	1.82274e-06
ABCA3	2.49933	-1.49814	1.15494	2.39305	0.302242	0.421613
ABCA4	15.8376	4.11783	0.747213	53.848	2.02797e-12	1.11328e-11
ABCA5	47.7116	-2.08674	0.281915	96.0222	1.40941e-21	1.10508e-20
ABCA6	31.8104	2.1783	0.359151	38.2132	5.03623e-09	2.26189e-08
ABCA7	10.0971	-0.305724	0.539121	3.49774	0.17397	0.269316
ABCA8	21.7121	-2.29134	0.433886	41.5062	9.70612e-10	4.58941e-09
ABCA9	4.14248	0.747857	0.816122	1.76777	0.413174	0.535972
ABCB1	10.4643	-3.88524	0.828461	43.586	3.43105e-10	1.66686e-09
ABCB10	148.155	-1.13094	0.159989	68.1236	1.6112e-15	1.02359e-14
ABCB6	41.3117	-1.12431	0.283325	18.8107	8.22815e-05	0.000253407
ABCB7	97.6041	-0.452804	0.177925	7.60406	0.0223254	0.0455579
ABCB8	89.7962	-0.101283	0.190646	0.928018	0.628758	0.727063
ABCB9	23.6562	0.24215	0.39445	1.76168	0.414435	0.537139
ABCC1	24.1591	0.209486	0.355979	0.502109	0.77798	0.84549
ABCC10	129.807	0.103102	0.160902	0.973544	0.614607	0.715654
ABCC2	5.93961	0.598014	0.695081	0.816216	0.664907	0.755928
ABCC3	121.452	-1.44761	0.170347	113.127	2.72164e-25	2.38983e-24
ABCC4	300.257	-0.239117	0.104175	5.53347	0.062867	0.113187
ABCC5	290.453	0.883995	0.106532	70.5006	4.90887e-16	3.19646e-15
ABCC9	0.824934	-3.14269	1.93541	3.91984	0.14087	0.225641
ABCD1	57.7323	0.926028	0.233204	16.1849	0.000305837	0.000874845
ABCD3	385.337	-0.0122813	0.0933251	36.8005	1.02066e-08	4.4838e-08
ABCD4	79.4166	0.196015	0.20044	0.996265	0.607664	0.710296
ABCE1	798.633	-0.567313	0.0721923	92.781	7.12628e-21	5.46643e-20
ABCF2	324.744	-0.334265	0.0996169	11.4047	0.00333806	0.00804664
ABCF3	170.147	0.506532	0.141267	17.5038	0.000158163	0.000469313
ABCG2	8.27012	-0.204087	0.586641	3.23994	0.197904	0.300086
ABHD10	424.378	0.473102	0.0906677	29.4938	3.9401e-07	1.54141e-06
ABHD11	30.6708	0.897438	0.327976	8.26329	0.0160564	0.0339827
ABHD11.AS1	1.79377	0.220843	1.30865	0.330568	0.847653	0.893626
ABHD12	166.041	-0.545354	0.137559	46.898	6.54979e-11	3.31639e-10
ABHD13	328.357	0.350209	0.100769	17.2775	0.000177113	0.000521791
ABHD14A	8.82417	-0.770811	0.594183	1.89749	0.387228	0.51033
ABHD14B	62.3653	-0.593837	0.233132	6.55265	0.0377668	0.0727079
ABHD15	63.044	0.727028	0.21755	12.7749	0.00168253	0.00429843
ABHD16B	25.0539	1.28723	0.37549	13.4343	0.00120997	0.00316903
ABHD17A	51.7802	0.261632	0.249969	1.67202	0.433436	0.555374
ABHD17B	293.336	1.0511	0.114082	170.424	9.83789e-38	1.15704e-36
ABHD17C	533.249	0.594968	0.0884499	412.182	3.13266e-90	8.0432e-89
ABHD18	69.3466	-0.210568	0.205194	2.69131	0.26037	0.374846
ABHD2	930.234	0.765626	0.0625593	229.102	1.78295e-50	2.68273e-49
ABHD3	47.9355	0.225136	0.250316	7.0831	0.0289684	0.0574269
ABHD4	124.949	0.997685	0.160128	39.3384	2.86933e-09	1.30885e-08
ABHD5	459.103	0.82233	0.0963821	184.158	1.02488e-40	1.28033e-39
ABHD6	52.3201	1.18151	0.251146	22.8585	1.08729e-05	3.71151e-05
ABHD8	30.6046	-0.0754023	0.320445	0.0911735	0.955437	0.966001
ABI1	809.47	0.455178	0.0713339	72.4316	1.86934e-16	1.2329e-15
ABI2	698.788	-0.137672	0.0718329	3.85242	0.145699	0.231919
ABI3	2.51764	-2.4228	1.30042	3.98198	0.13656	0.219661
ABI3BP	17.2075	-0.648586	0.424145	2.69006	0.260531	0.375006
ABL1	681.788	0.669435	0.0757578	153.184	5.45226e-34	5.94233e-33
ABL2	1833.83	0.982524	0.0492419	710.228	5.96898e-155	2.41127e-153
ABLIM1	99.6252	-1.83371	0.194037	147.442	9.62659e-33	1.01712e-31
ABLIM3	360.012	0.309225	0.101421	61.6879	4.02382e-14	2.40234e-13
ABRACL	330.716	1.10833	0.104625	114.179	1.60788e-25	1.42193e-24
ABRAXAS1	61.1668	0.123651	0.218895	2.50785	0.285382	0.402934
ABRAXAS2	211.872	-0.023052	0.125792	0.944124	0.623715	0.722862
ABT1	95.1076	0.261018	0.191966	4.52875	0.103895	0.174422
ABTB1	59.1005	1.03599	0.253618	20.9632	2.80482e-05	9.11596e-05
ABTB2	75.1425	1.01804	0.204448	27.7642	9.35579e-07	3.53541e-06
ACAA1	93.3372	-0.173168	0.186919	1.9699	0.373459	0.496497
ACAA2	57.9462	-0.510755	0.233314	20.8635	2.94812e-05	9.55874e-05
ACACA	2.77862	-0.432578	1.01944	1.87725	0.391165	0.514107
ACACB	7.86286	-0.159812	0.590642	6.10173	0.0473179	0.0884703
ACAD10	44.97	-0.335853	0.255996	2.4049	0.300457	0.419437
ACAD8	76.0996	0.509533	0.202115	7.35332	0.0253073	0.050985
ACAD9	119.303	0.0127988	0.157256	2.05789	0.357384	0.47976
ACADM	341.44	-0.0277991	0.0973734	0.12008	0.941727	0.956574
ACADS	8.32	-1.57174	0.714463	5.52994	0.0629781	0.113345
ACADSB	187.007	-0.246634	0.130788	7.79341	0.0203087	0.0419377
ACADVL	665.219	0.0513889	0.0734763	4.04332	0.132435	0.214091
ACAP1	5.97996	-0.00510788	0.748921	2.17844	0.336479	0.45811
ACAP2	1434.96	0.258453	0.0595116	24.4642	4.87155e-06	1.72307e-05
ACAP3	135.016	0.0676709	0.151703	13.2973	0.00129578	0.00337652
ACAT1	383.75	-0.261703	0.0939266	8.27606	0.0159543	0.0337954
ACAT2	103.442	-0.669227	0.177457	18.8878	7.91699e-05	0.000244432
ACBD3	877.16	0.207099	0.0670109	15.029	0.000545122	0.00150404
ACBD3.AS1	2.36405	0.664693	1.16491	0.653525	0.721255	0.801538
ACBD4	10.2901	-1.44529	0.568841	9.08925	0.0106241	0.0232982
ACBD5	290.383	-0.0219295	0.103413	0.458993	0.794934	0.857894
ACBD6	116.544	-0.0940953	0.163897	0.381197	0.826464	0.879409
ACBD7	4.23619	-3.55106	1.15465	18.2656	0.00010806	0.000327507
ACCS	8.66975	-1.07794	0.612582	3.15206	0.206794	0.310494
ACD	30.8444	-0.00587163	0.308539	0.761762	0.683259	0.770838
ACE	11.6793	-0.833851	0.523711	2.74379	0.253626	0.366949
ACER2	18.5744	0.473516	0.392133	2.95102	0.228662	0.337198
ACER3	226.499	0.180221	0.122569	2.58361	0.274775	0.390928
ACIN1	804.454	0.40882	0.0658042	41.9701	7.69663e-10	3.66255e-09
ACKR3	1.50332	0.555064	1.97978	13.3752	0.00124628	0.0032561
ACKR4	164.92	-4.1508	0.220973	760.761	6.35137e-166	2.77704e-164
ACLY	1398.78	0.268832	0.0519556	28.3729	6.9009e-07	2.64472e-06
ACO1	1294.09	0.644836	0.0562446	143.432	7.14623e-32	7.43948e-31
ACO2	127.131	-0.916621	0.162173	38.4716	4.42588e-09	1.99621e-08
ACOT1	4.21431	-0.411689	0.899201	0.301568	0.860033	0.901636
ACOT11	7.91394	0.882571	0.623971	2.10634	0.348831	0.470787
ACOT13	87.4189	0.176862	0.181463	2.79805	0.246837	0.359151
ACOT2	47.5469	-0.32304	0.251984	3.44131	0.178948	0.275731
ACOT7	249.258	0.707708	0.11333	39.3818	2.80777e-09	1.28234e-08
ACOT8	35.6227	0.0509661	0.287434	0.593194	0.743344	0.819287
ACOT9	338.32	0.306707	0.106011	8.3964	0.0150226	0.0319951
ACOX1	531.159	0.836593	0.0812641	107.956	3.61211e-24	3.06668e-23
ACOX2	21.0103	0.339341	0.411653	1.20125	0.548468	0.660151
ACOX3	78.0164	-0.636181	0.197167	11.748	0.00281157	0.00688354
ACP1	471.978	-0.0302967	0.0835357	0.133634	0.935367	0.952539
ACP2	71.7431	-0.680118	0.23774	17.8823	0.000130888	0.000392533
ACP5	5.72407	0.975843	0.712555	2.23876	0.326483	0.44778
ACP6	16.8049	-0.220573	0.432155	0.944425	0.623621	0.722809
ACP7	92.0937	6.27208	0.666383	404.533	1.4351e-88	3.60374e-87
ACPP	1639.77	5.1831	0.108486	5581.56	0	0
ACRV1	0.908969	2.69256	1.88011	2.96209	0.227399	0.335698
ACSBG1	2.31372	-0.706968	1.12047	0.5844	0.746619	0.82166
ACSF2	10.3328	-1.72008	0.568515	12.7578	0.00169695	0.00433452
ACSF3	37.0111	0.161305	0.27806	0.955839	0.620072	0.720155
ACSL1	225.32	0.4298	0.12547	12.7315	0.00171942	0.00438662
ACSL3	1296.05	0.594511	0.0585353	188.766	1.02318e-41	1.309e-40
ACSL4	3038.9	0.230789	0.0461727	218.981	2.81069e-48	4.05667e-47
ACSL5	6.53578	0.113569	0.663792	0.0319395	0.984157	0.986413
ACSM4	2.70606	2.78139	1.32704	6.23042	0.0443692	0.083694
ACSS1	7.57701	-1.15902	0.652592	7.87273	0.0195191	0.0404927
ACSS2	139.376	0.325416	0.162246	4.53259	0.103696	0.174186
ACSS3	1.5212	-1.63714	1.47622	1.72009	0.423143	0.545856
ACTA1	1.80881	-1.92209	1.42313	2.05943	0.357109	0.479435
ACTA2	185.84	-3.15853	0.165674	841.796	1.60774e-183	7.83628e-182
ACTA2.AS1	1.4513	-1.54028	1.47345	3.00964	0.222057	0.329319
ACTB	15266.9	-1.23727	0.0376842	1153.2	3.84506e-251	2.52924e-249
ACTC1	2.85712	-2.75148	1.26668	8.07504	0.0176412	0.0369685
ACTG1	16971.4	-0.965968	0.0271706	1387.2	5.93464e-302	4.87428e-300
ACTG1P20	110.553	-0.691436	0.170019	25.5555	2.82293e-06	1.02081e-05
ACTG1P4	7.94529	-0.917991	0.6545	1.98485	0.370676	0.493416
ACTG2	17.5366	-4.43044	0.71921	89.9797	2.89167e-20	2.17329e-19
ACTL10	2.89237	-0.620665	1.1601	0.285949	0.866776	0.906408
ACTL6A	298.51	-0.0195319	0.109213	15.8014	0.000370489	0.00104674
ACTN1	4117.57	-0.427067	0.0424168	142.594	1.08662e-31	1.12648e-30
ACTN4	1593.48	-0.633937	0.0578188	147.649	8.67863e-33	9.18921e-32
ACTR10	437.449	-0.160877	0.0967456	6.37952	0.0411817	0.0785586
ACTR1A	598.526	0.247035	0.0730068	11.8223	0.00270912	0.00664913
ACTR1B	214.916	-0.92376	0.12933	52.6711	3.65271e-12	1.97459e-11
ACTR2	4350.8	-0.220603	0.0410233	34.9444	2.58174e-08	1.10224e-07
ACTR3	3771.43	-0.242374	0.0410488	34.9522	2.57177e-08	1.0984e-07
ACTR3.AS1	1.29095	-0.215248	1.46508	0.343532	0.842176	0.890518
ACTR3B	14.8025	-2.26825	0.551699	20.2362	4.03419e-05	0.000128834
ACTR3C	1.64391	-0.765207	1.41022	0.330457	0.8477	0.893626
ACTR5	18.3944	-0.203673	0.407818	0.525645	0.768878	0.838602
ACTR6	231.829	-0.0559859	0.117937	0.70999	0.701177	0.785272
ACTR8	225.132	0.0614427	0.115959	0.839312	0.657273	0.750059
ACTRT3	13.2556	-0.249282	0.498794	0.26829	0.874463	0.911689
ACVR1	511.673	0.728925	0.0846249	75.5383	3.95433e-17	2.65876e-16
ACVR1B	314.518	0.458153	0.102942	62.3647	2.86871e-14	1.72447e-13
ACVR1C	12.4857	-0.12714	0.487893	0.082487	0.959595	0.968718
ACVR2A	68.7494	0.374509	0.227361	7.68902	0.0213969	0.0438679
ACVR2B	52.3177	1.20078	0.246279	26.2851	1.96007e-06	7.17696e-06
ACVRL1	394.268	2.1193	0.114422	778.546	8.72717e-170	3.90777e-168
ACY1	1.66122	0.800625	1.52637	0.366599	0.832519	0.884079
ACYP1	53.2252	0.49761	0.239017	5.52892	0.0630101	0.113375
ACYP2	68.3889	-0.314868	0.215546	3.91226	0.141405	0.226212
ADA	15.4648	-0.463026	0.442114	1.561	0.458177	0.578254
ADA2	7.27015	-3.35746	0.877893	25.2502	3.28851e-06	1.18141e-05
ADAL	37.8954	-0.723799	0.282661	9.08331	0.0106557	0.0233606
ADAM10	1838.06	-0.402292	0.0516759	82.217	1.40219e-18	9.94988e-18
ADAM12	107.717	-1.55887	0.189852	98.6697	3.75103e-22	2.99157e-21
ADAM15	142.704	-0.487448	0.145415	20.9718	2.79278e-05	9.07881e-05
ADAM17	368.99	0.415143	0.101003	17.0584	0.000197611	0.000578398
ADAM19	2055.1	2.56785	0.0525685	2467.25	0	0
ADAM1A	11.2434	-1.1766	0.565439	4.40872	0.110321	0.183778
ADAM21	2.24036	-1.27441	1.17678	3.5941	0.165787	0.258127
ADAM22	1.81276	0.5562	1.30965	1.54987	0.460734	0.580644
ADAM23	8.74131	1.84404	0.607337	10.1354	0.00629696	0.0143685
ADAM28	3.11602	1.69733	1.11376	2.80619	0.245834	0.358006
ADAM33	310.697	0.32917	0.105623	10.1523	0.00624384	0.014256
ADAM8	17.1896	1.58014	0.427655	15.0131	0.000549483	0.00151523
ADAM9	2106.1	-0.292285	0.0432996	99.1184	2.99714e-22	2.40191e-21
ADAMTS1	1666.37	-1.32048	0.0522814	2199.61	0	0
ADAMTS10	3.45195	0.17815	0.898763	0.113783	0.944697	0.958567
ADAMTS12	219.353	-1.42014	0.129583	159.72	2.076e-35	2.32569e-34
ADAMTS13	5.1572	-0.603749	0.744911	2.06256	0.35655	0.478938
ADAMTS14	17.6958	-2.23482	0.511641	23.7198	7.06838e-06	2.46663e-05
ADAMTS15	12.454	-2.97197	0.607914	54.0829	1.80319e-12	9.9319e-12
ADAMTS2	271.37	-2.03797	0.126654	505.878	1.41243e-110	4.23331e-109
ADAMTS3	12.4784	0.275071	0.504058	0.611157	0.736697	0.814195
ADAMTS4	847.965	4.46159	0.131141	2306.2	0	0
ADAMTS5	76.1094	1.26847	0.204556	74.2201	7.64382e-17	5.10022e-16
ADAMTS6	438.835	0.292407	0.0903697	68.8439	1.12391e-15	7.18627e-15
ADAMTS7	5.9138	-1.5	0.745014	8.19914	0.0165798	0.0349314
ADAMTS8	1.06009	3.71131	1.82573	4.60773	0.0998719	0.16885
ADAMTS9	9.29528	5.22095	1.09618	38.104	5.31879e-09	2.38519e-08
ADAMTSL1	388.419	-0.246338	0.0897549	248.728	9.76024e-55	1.55849e-53
ADAMTSL4	93.7734	0.676461	0.179593	14.9046	0.000580103	0.00159229
ADAMTSL4.AS1	5.30179	2.44996	0.925063	9.70619	0.00780418	0.0175199
ADAMTSL5	67.01	-0.372785	0.209801	15.3912	0.000454829	0.00126881
ADAP2	1.26085	0.651993	1.4985	0.634435	0.728172	0.807245
ADAR	1505.54	0.0853995	0.0572487	3.75183	0.153215	0.241588
ADARB1	70.9721	-0.64099	0.208135	14.7505	0.000626558	0.00171252
ADAT1	176.131	-0.144696	0.143393	1.38239	0.500977	0.618617
ADAT2	52.9758	-1.09428	0.265612	17.5773	0.000152455	0.00045328
ADAT3	11.9646	0.892557	0.509852	3.49924	0.17384	0.269199
ADCK1	17.4908	-0.822959	0.416696	6.00855	0.0495748	0.0919155
ADCK2	25.6668	-0.634985	0.34612	3.46073	0.17722	0.273436
ADCK5	19.2034	-0.478975	0.407026	1.49029	0.474666	0.594507
ADCY1	1.10728	-0.824222	1.62031	0.293265	0.863611	0.904371
ADCY10P1	16.0821	0.614141	0.43811	3.06535	0.215957	0.321943
ADCY3	170.617	0.0370286	0.132044	0.446521	0.799907	0.861442
ADCY4	15.853	0.356289	0.459234	8.36022	0.0152968	0.0325233
ADCY5	1.51736	0.981557	1.41958	1.82271	0.401979	0.52484
ADCY6	309.794	-0.291405	0.10484	28.4474	6.64868e-07	2.55201e-06
ADCY7	281.244	0.944628	0.106627	81.9117	1.63343e-18	1.15521e-17
ADCY8	2.20676	3.25603	1.64175	12.2124	0.00222895	0.00556153
ADCY9	220.73	-1.06664	0.122257	104.753	1.79101e-23	1.49245e-22
ADD1	1177.08	-0.186422	0.0554357	13.33	0.00127474	0.0033252
ADD3	802.331	-1.0921	0.0682021	389.283	2.93938e-85	7.09364e-84
ADGRA2	166.502	-2.3641	0.160193	387.007	9.17356e-85	2.19251e-83
ADGRA3	514.041	0.292883	0.0851755	45.0107	1.68289e-10	8.3254e-10
ADGRB1	7.69346	1.28374	0.710483	10.6934	0.00476384	0.0111526
ADGRB2	52.9735	0.437378	0.231839	5.07218	0.0791756	0.138116
ADGRE1	0.96087	-0.284928	1.82064	0.333123	0.846571	0.893183
ADGRE2	81.2823	3.67152	0.27944	230.764	7.76645e-51	1.17453e-49
ADGRE5	486.562	0.494831	0.0834024	37.7876	6.23051e-09	2.77646e-08
ADGRF4	1.35324	4.03388	1.66961	6.29996	0.0428529	0.0812773
ADGRF5	1.00296	3.50011	1.95194	3.64062	0.161975	0.253013
ADGRG1	135.557	4.88837	0.276888	507.262	7.06922e-111	2.12305e-109
ADGRG2	2.21643	-0.517097	1.15252	0.308781	0.856937	0.899663
ADGRG6	39.5593	-4.49627	0.483881	218.809	3.06361e-48	4.40887e-47
ADGRL1	18.4303	0.431365	0.394723	5.54162	0.0626114	0.112781
ADGRL2	187.109	0.956891	0.126834	113.71	2.03293e-25	1.79249e-24
ADGRL4	943.849	2.39945	0.0770596	1011.85	1.90164e-220	1.079e-218
ADH5	822.28	-0.293467	0.0657017	24.7175	4.29211e-06	1.5283e-05
ADH6	1.32142	-1.18481	1.55962	1.35938	0.506774	0.624064
ADHFE1	9.56569	-0.495633	0.532793	7.54625	0.0229802	0.0467528
ADI1	169.742	0.511566	0.135158	14.9188	0.000575995	0.00158247
ADIPOR1	637.07	0.501083	0.0799431	47.1155	5.8748e-11	2.98172e-10
ADIPOR2	561.935	0.593348	0.0831754	73.5511	1.06804e-16	7.10402e-16
ADIRF	127.365	2.04972	0.170772	151.916	1.0276e-33	1.11343e-32
ADK	723.397	0.625422	0.070464	121.308	4.55395e-27	4.20752e-26
ADM	419.069	-2.12104	0.106036	470.807	5.82987e-103	1.63832e-101
ADM2	3.66521	-1.18693	0.955769	2.25561	0.323743	0.444762
ADM5	1.80077	-0.181424	1.22872	0.516403	0.77244	0.841375
ADNP	712.602	0.106643	0.0726141	4.89158	0.0866577	0.149397
ADNP.AS1	8.30875	0.239602	0.598864	0.234168	0.88951	0.922202
ADNP2	154.083	-0.122219	0.141591	4.0699	0.130687	0.211703
ADO	300.069	0.490074	0.110787	45.6445	1.22582e-10	6.10078e-10
ADORA1	1.9192	0.737896	1.22857	1.01147	0.603062	0.706866
ADORA2A.AS1	4.11002	1.36448	0.94346	4.80891	0.0903148	0.155073
ADORA2B	11.7063	-1.27057	0.506373	18.0071	0.00012297	0.000369981
ADPGK	297.553	-0.331219	0.108379	10.1701	0.00618854	0.0141474
ADPGK.AS1	1.0986	-1.41583	1.58364	2.1065	0.348803	0.470787
ADPRH	6.44942	-1.31606	0.742896	3.46793	0.176583	0.272594
ADPRHL1	4.98494	1.51927	0.817837	3.63845	0.162151	0.253261
ADPRHL2	91.0515	0.171609	0.182979	0.892828	0.639919	0.735222
ADPRM	30.6867	0.290118	0.316098	2.35589	0.307912	0.427636
ADRA1D	34.7022	-1.77395	0.313259	57.7769	2.84387e-13	1.6298e-12
ADRA2A	1.16596	2.89277	1.74599	3.25575	0.196346	0.298149
ADRB2	4.32928	-3.15094	1.05335	22.9824	1.02199e-05	3.49582e-05
ADRM1	317.993	0.257416	0.104415	6.23999	0.0441574	0.0833368
ADSL	229.465	-0.550599	0.119919	21.5138	2.12983e-05	7.03132e-05
ADSS	914.525	0.735781	0.0623616	213.695	3.95185e-47	5.56328e-46
ADSSL1	3.86376	-0.794175	0.844387	5.40887	0.0669083	0.119476
ADTRP	18.4036	4.31318	0.68264	63.839	1.37256e-14	8.36248e-14
AEBP1	797.358	0.059743	0.0763856	25.0018	3.7233e-06	1.33054e-05
AEBP2	373.674	-0.552804	0.093028	35.898	1.60269e-08	6.94219e-08
AEN	239.615	-0.448249	0.116204	19.77	5.09323e-05	0.000160858
AES	726.147	0.0519625	0.0731643	3.56315	0.168373	0.261577
AFAP1	1117.56	-1.19478	0.0629578	371.558	2.07561e-81	4.73978e-80
AFAP1.AS1	6.27694	-1.47706	0.751848	4.05272	0.131815	0.21325
AFAP1L1	12.6525	0.21904	0.474852	0.862496	0.649698	0.74387
AFDN	303.029	0.211906	0.102095	17.1164	0.000191967	0.000563099
AFF1	624.389	0.883958	0.0835843	125.901	4.58105e-28	4.35712e-27
AFF1.AS1	9.05929	-0.708907	0.589027	1.69542	0.428395	0.550339
AFF3	52.4446	-1.51845	0.246653	68.7208	1.19528e-15	7.63603e-15
AFF4	3866.02	0.539069	0.0412651	288.611	2.13295e-63	3.87634e-62
AFG1L	24.5038	-0.887168	0.351056	11.031	0.00402395	0.0095346
AFG3L1P	32.8243	-0.199832	0.299703	1.33595	0.512747	0.62975
AFG3L2	198.303	0.0366768	0.131817	0.0844508	0.958654	0.968031
AFMID	50.6425	0.0160829	0.243189	0.12124	0.941181	0.956363
AFTPH	305.875	0.462658	0.104314	21.4188	2.23336e-05	7.35351e-05
AGA	347.2	0.575221	0.0979671	39.7095	2.38337e-09	1.09457e-08
AGAP1	155.662	1.5808	0.149264	129.827	6.43185e-29	6.24941e-28
AGAP1.IT1	1.53652	3.07452	1.6172	4.1292	0.126869	0.206417
AGAP11	6.70577	0.423923	0.62681	6.09601	0.0474535	0.0886792
AGAP2	1.30376	-0.567207	1.53455	0.175341	0.916063	0.940093
AGAP2.AS1	13.2786	0.629508	0.474964	2.26884	0.321608	0.442401
AGAP3	191.472	0.342283	0.132266	8.74458	0.0126223	0.0272539
AGAP4	4.79572	0.785901	0.776599	1.73682	0.419619	0.542596
AGAP5	5.92187	-0.607786	0.697296	3.87363	0.144162	0.229899
AGAP6	36.5603	-0.229712	0.287375	0.951653	0.621371	0.72127
AGAP9	4.87129	-1.44741	0.834726	3.33798	0.188438	0.288114
AGBL2	2.94625	0.021184	1.01674	0.264439	0.876149	0.912806
AGBL3	2.82288	-2.13462	1.1614	4.28588	0.117309	0.193554
AGBL5	52.4353	-0.740386	0.251004	9.76474	0.00757902	0.017035
AGFG1	863.695	-0.0381668	0.0652959	53.1761	2.83757e-12	1.54179e-11
AGFG2	30.3498	-0.391233	0.332696	2.00406	0.367133	0.489929
AGGF1	339.155	-0.175989	0.0989577	5.6005	0.0607948	0.110029
AGK	17.5392	-0.430453	0.418259	1.25164	0.534822	0.648928
AGL	286.232	-0.340287	0.11601	11.8458	0.00267738	0.00658101
AGMAT	4.70772	-1.28453	0.843119	2.45723	0.292697	0.410455
AGO1	214.181	0.0373719	0.128373	0.390823	0.822496	0.876755
AGO2	918.65	0.718179	0.0678578	192.03	2.00096e-42	2.60248e-41
AGO3	98.2031	0.264377	0.184124	4.75062	0.0929854	0.158753
AGO4	123.779	-0.195474	0.157293	5.25127	0.0723936	0.127906
AGPAT2	126.059	0.11968	0.165481	0.73713	0.691726	0.777911
AGPAT3	666.916	-0.557032	0.075788	54.5944	1.39627e-12	7.73935e-12
AGPAT4	32.6266	-0.311025	0.313604	1.59469	0.450523	0.571164
AGPAT4.IT1	1.82013	-0.651544	1.2434	1.08108	0.582433	0.689093
AGPAT5	255.08	-0.231346	0.114022	17.6394	0.000147795	0.000440305
AGPS	288.06	-0.303389	0.103165	39.9197	2.14562e-09	9.88434e-09
AGRN	300.479	-0.61599	0.1266	56.4532	5.51238e-13	3.10995e-12
AGTPBP1	69.0811	-1.05034	0.219686	27.4754	1.08093e-06	4.05889e-06
AGTRAP	119.295	0.976954	0.163788	40.9151	1.30436e-09	6.11691e-09
AHCTF1	338.73	0.0791743	0.099188	16.1128	0.000317059	0.000905029
AHCTF1P1	124.378	0.140073	0.15853	12.2809	0.00215399	0.00539167
AHCY	294.692	-0.242651	0.106293	6.05619	0.0484077	0.0902017
AHCYL1	1332.89	0.749376	0.0553067	188.05	1.46383e-41	1.86792e-40
AHCYL2	134.394	0.625076	0.149617	18.6258	9.02522e-05	0.000276352
AHDC1	157.895	-0.478166	0.156498	14.4001	0.000746535	0.00201818
AHI1	494.998	1.23525	0.0844487	252.944	1.18538e-55	1.91126e-54
AHNAK	11530	-0.0597858	0.031003	6.62727	0.0363836	0.0702897
AHNAK2	780.285	1.20438	0.0699215	308.54	1.0034e-67	1.93973e-66
AHR	500.444	-1.81275	0.0886484	608.851	6.16273e-133	2.15059e-131
AHRR	223.572	-1.87982	0.128625	282.865	3.77273e-62	6.69278e-61
AHSA1	377.621	0.35907	0.0928954	29.3156	4.30721e-07	1.67928e-06
AHSA2P	173.361	-0.325979	0.141778	7.59062	0.0224759	0.0458273
AIDA	282.677	0.693735	0.108982	58.4484	2.03283e-13	1.17588e-12
AIFM1	114.496	-0.00901152	0.172335	0.15661	0.924682	0.945911
AIFM2	78.9817	-0.345083	0.20865	5.15965	0.0757872	0.13297
AIG1	201.365	-0.862323	0.132238	68.8643	1.11253e-15	7.11654e-15
AIM2	2.83878	5.21347	1.45892	14.5122	0.000705844	0.00191689
AIMP1	328.168	-0.50058	0.101875	27.4918	1.07207e-06	4.02868e-06
AIMP2	36.9758	-0.480346	0.292461	3.09966	0.212284	0.317486
AIP	88.1847	0.176243	0.184551	1.78216	0.410213	0.533384
AJAP1	73.2195	-1.04864	0.224006	22.6072	1.23286e-05	4.18632e-05
AJM1	8.35026	-0.581784	0.599168	5.48213	0.0645016	0.115695
AJUBA	241.424	-2.0474	0.131189	407.222	3.73966e-89	9.43868e-88
AK1	83.4115	0.172243	0.201786	2.15628	0.340227	0.461859
AK2	261.609	-0.627564	0.113421	34.0833	3.97111e-08	1.67712e-07
AK3	1067.62	0.120397	0.0633451	3.88658	0.143232	0.228758
AK4	15.9077	-0.544916	0.458462	3.43309	0.179686	0.276581
AK5	214.886	-0.819249	0.132051	106.267	8.40298e-24	7.07354e-23
AK9	24.2174	0.342968	0.372258	2.22251	0.329146	0.450311
AKAP1	65.9499	-0.220186	0.213925	4.09286	0.129195	0.209606
AKAP10	279.043	0.279844	0.106089	15.2905	0.000478311	0.00132858
AKAP11	1709.27	0.0380684	0.0515317	78.5385	8.82217e-18	6.07177e-17
AKAP12	2025.55	0.862835	0.0491187	590.905	4.8609e-129	1.6612e-127
AKAP13	531.177	0.0369396	0.0793367	16.4306	0.000270488	0.000778825
AKAP2	2.5531	0.681905	1.08528	0.507944	0.775714	0.843772
AKAP3	8.45119	2.95602	0.775698	19.8445	4.90702e-05	0.00015544
AKAP5	20.1561	-2.62013	0.461148	75.1802	4.72961e-17	3.17285e-16
AKAP6	49.9613	-0.728565	0.238748	53.0313	3.05075e-12	1.6552e-11
AKAP7	10.3257	-1.65249	0.569636	11.4089	0.00333116	0.0080326
AKAP8	141.714	0.236243	0.1535	4.19242	0.122922	0.201184
AKAP8L	91.6539	-0.101244	0.184351	0.508195	0.775616	0.843772
AKAP9	1015.57	0.140082	0.059161	10.1253	0.00632861	0.0144341
AKIP1	121.227	0.262258	0.159801	3.20536	0.201356	0.304203
AKIRIN1	869.825	1.09807	0.0687403	257.46	1.23951e-56	2.03384e-55
AKIRIN2	222.025	0.281544	0.117792	8.6129	0.0134813	0.0289698
AKNA	31.8948	0.677965	0.310641	6.27266	0.0434419	0.0821742
AKNAD1	3.02888	0.34334	1.07263	0.248544	0.88314	0.917581
AKR1A1	174.941	0.663791	0.135972	25.4115	3.0337e-06	1.09304e-05
AKR1B1	2369.25	1.49368	0.0880934	338.074	3.87479e-74	8.02265e-73
AKR1C1	74.743	0.634591	0.206229	14.3437	0.000767887	0.00207251
AKR1C2	2.32184	-3.08565	1.56336	3.81895	0.148158	0.235111
AKR1C3	3.55075	-1.93361	1.09979	3.71073	0.156396	0.245484
AKR1E2	4.57288	-0.854316	0.832927	1.61783	0.445341	0.566818
AKR7A2	180.137	0.744203	0.135113	38.5319	4.29434e-09	1.93982e-08
AKR7A2P1	4.49036	0.386345	0.870306	1.59045	0.451479	0.571987
AKR7A3	1.28637	1.09568	1.68225	1.86472	0.393624	0.516516
AKR7L	0.833385	-0.165579	1.99578	1.35759	0.507228	0.624413
AKT1	696.049	-0.313838	0.0708141	19.9892	4.56463e-05	0.000144995
AKT1S1	266.517	0.450953	0.110216	42.9023	4.82937e-10	2.31966e-09
AKT2	364.189	-0.0596238	0.0962068	0.470585	0.79034	0.854052
AKTIP	22.8935	-1.20962	0.389064	19.5873	5.58049e-05	0.00017502
ALAD	171.915	0.139297	0.133414	1.27037	0.529837	0.64509
ALAS1	204.654	0.775324	0.136569	37.7528	6.33994e-09	2.82184e-08
ALCAM	1249.01	-1.66327	0.0568531	1789.67	0	0
ALDH16A1	47.8059	-0.341814	0.252103	3.61862	0.163767	0.255446
ALDH18A1	497.715	-0.507707	0.0811306	70.6003	4.67032e-16	3.04513e-15
ALDH1A1	316.247	-4.92411	0.188558	2294.65	0	0
ALDH1B1	125.746	-2.4896	0.186834	270.123	2.20606e-59	3.75232e-58
ALDH1L2	289.963	-1.5933	0.119178	244.351	8.70883e-54	1.36711e-52
ALDH2	96.1067	-0.373616	0.188023	10.9587	0.00417206	0.00985725
ALDH3A2	90.9146	1.01676	0.180458	39.3893	2.79726e-09	1.27833e-08
ALDH3B1	82.2244	-1.01636	0.201977	54.8626	1.22107e-12	6.80631e-12
ALDH4A1	40.4175	-1.94553	0.304749	66.3816	3.84958e-15	2.40554e-14
ALDH5A1	3.12366	-0.880453	0.949277	4.27665	0.117852	0.194298
ALDH6A1	103.669	-1.02159	0.177792	40.4566	1.64041e-09	7.62072e-09
ALDH7A1	109.724	-1.00603	0.168513	68.6716	1.22502e-15	7.82265e-15
ALDH9A1	641.73	0.160811	0.0740026	4.75409	0.0928246	0.15854
ALDOA	2799.44	0.504998	0.0511729	106.718	6.70652e-24	5.65508e-23
ALDOC	21.2066	-0.519957	0.390871	2.13254	0.344291	0.466225
ALG1	58.1871	0.307726	0.227435	2.29796	0.31696	0.437382
ALG10	21.4817	-1.10414	0.404739	8.7267	0.0127357	0.0274787
ALG10B	76.0014	-0.434181	0.193794	18.2683	0.000107916	0.000327174
ALG11	58.1355	-0.732823	0.24054	9.56303	0.00838327	0.0187266
ALG12	92.7312	0.170616	0.179658	2.92541	0.231609	0.3408
ALG13	260.692	0.0687557	0.109405	5.87844	0.0529069	0.0974133
ALG14	55.5825	-0.406097	0.241556	3.37855	0.184653	0.283054
ALG1L9P	1.26195	-2.14189	1.84803	1.43167	0.488783	0.607953
ALG2	357.999	0.0458783	0.0966914	2.27433	0.320728	0.441558
ALG3	206.488	0.411027	0.126969	12.0762	0.00238607	0.00591292
ALG5	151.019	0.0613999	0.151149	0.223585	0.89423	0.925096
ALG6	47.479	-0.70232	0.266726	9.45926	0.00882975	0.0196413
ALG8	254.374	-0.0570217	0.111134	0.301484	0.86007	0.901636
ALG9	132.001	-0.551805	0.152605	15.3439	0.000465715	0.00129602
ALKBH1	71.3394	0.182971	0.206999	2.39492	0.301961	0.421339
ALKBH2	23.4224	-0.707289	0.37775	4.1136	0.127863	0.207897
ALKBH3	46.6195	-0.523699	0.257186	4.57347	0.101598	0.171251
ALKBH3.AS1	1.80288	-0.260425	1.29037	0.933765	0.626954	0.725541
ALKBH4	15.74	-0.149828	0.465079	0.431583	0.805903	0.865681
ALKBH5	383.368	0.304319	0.097243	11.0833	0.00392004	0.00930836
ALKBH6	42.7375	-0.087361	0.278292	2.56962	0.276703	0.393069
ALKBH7	55.0615	0.555372	0.248429	5.04385	0.0803049	0.139824
ALKBH8	131.021	0.61421	0.160659	25.1968	3.37737e-06	1.21158e-05
ALMS1	127.532	-0.629328	0.157277	16.3279	0.000284741	0.000817173
ALMS1.IT1	2.59336	-0.788533	1.24191	1.07186	0.585125	0.691342
ALOX12	4.3004	-0.710024	0.806738	4.03937	0.132697	0.214445
ALOX12.AS1	4.61889	-0.794898	0.791822	1.82684	0.401149	0.524078
ALOXE3	6.56171	3.00312	0.856951	13.9246	0.000946907	0.00251955
ALPK1	46.1925	-1.10542	0.281046	16.5025	0.000260926	0.000752751
ALPK2	315.817	-2.86893	0.131986	731.476	1.45226e-159	6.06442e-158
ALPK3	2.07816	0.21846	1.23097	0.21614	0.897565	0.927359
ALPL	2.84892	-0.194481	1.30354	8.42438	0.0148139	0.0315823
ALS2	388.928	-0.923301	0.0945636	151.445	1.30035e-33	1.40691e-32
ALS2CL	6.93685	-1.6045	0.717965	6.17304	0.0456607	0.0858469
ALS2CR12	4.98444	0.280415	0.768767	0.146665	0.929292	0.948562
ALX3	5.28174	0.390238	0.743905	0.311977	0.855569	0.898587
ALYREF	131.678	-0.159059	0.154162	2.77159	0.250125	0.363044
AMACR	2.74838	-0.0255969	1.05293	0.0176747	0.991202	0.992336
AMBRA1	116.675	0.373348	0.164498	5.18337	0.0748936	0.131619
AMD1	1680.69	-0.288874	0.0542813	32.3723	9.34213e-08	3.83223e-07
AMDHD1	2.35633	3.76075	1.50786	7.44001	0.0242339	0.0490151
AMDHD2	36.8766	0.828452	0.290033	9.81334	0.00739707	0.0166538
AMER1	25.8489	-0.596951	0.348995	3.0108	0.221929	0.329191
AMFR	631.013	-0.0596417	0.0783368	1.99867	0.368125	0.490855
AMH	1.99931	1.24402	1.20551	2.08372	0.352797	0.474847
AMIGO1	18.1588	-0.766413	0.414556	6.11991	0.0468899	0.0878469
AMIGO2	29.0892	-3.55931	0.451762	142.873	9.45159e-32	9.81197e-31
AMIGO3	18.153	-0.384085	0.409642	1.86612	0.393348	0.516245
AMMECR1	285.187	0.075978	0.108382	38.2126	5.03782e-09	2.26192e-08
AMMECR1L	298.789	0.381104	0.104392	22.0842	1.6013e-05	5.37478e-05
AMN1	50.371	0.525106	0.248667	5.26009	0.0720751	0.12745
AMOT	4.92951	-1.02942	0.802491	4.25988	0.118845	0.195675
AMOTL1	787.573	-0.438454	0.071922	57.668	3.00297e-13	1.71965e-12
AMOTL2	376.713	-2.76518	0.121502	782.348	1.30426e-170	5.85773e-169
AMPD2	552.074	0.275481	0.0834326	45.2811	1.47005e-10	7.29433e-10
AMPD3	460.867	2.34027	0.111627	1073.38	8.26916e-234	4.99713e-232
AMPH	26.3776	-0.515661	0.338586	10.8587	0.00438591	0.0103231
AMT	8.45277	-1.64098	0.684352	6.76305	0.0339956	0.0661404
AMY2B	19.3633	0.126857	0.407405	0.887129	0.641745	0.736921
AMZ1	53.4905	0.315023	0.2515	2.44415	0.294619	0.4128
AMZ2	209.46	-0.183852	0.127997	4.81546	0.0900193	0.154655
AMZ2P1	12.7237	-1.23077	0.505397	9.68212	0.00789867	0.0177187
ANAPC1	117.023	-0.351731	0.163971	6.10303	0.0472873	0.0884243
ANAPC10	68.7313	-0.240817	0.210453	2.06819	0.355548	0.477943
ANAPC11	258.863	-0.0426073	0.115009	8.32968	0.0155322	0.0329624
ANAPC13	419.796	-0.538138	0.0915707	35.4746	1.9806e-08	8.51958e-08
ANAPC15	11.3642	0.503187	0.523046	0.988884	0.609911	0.712267
ANAPC16	215.159	-0.530125	0.124709	21.7334	1.9083e-05	6.3323e-05
ANAPC2	75.983	-0.119267	0.200466	0.370791	0.830776	0.882606
ANAPC4	172.807	-0.288357	0.137246	6.35093	0.0417747	0.0795061
ANAPC5	480.314	-0.242482	0.0830638	13.0656	0.00145493	0.00375895
ANAPC7	286.937	0.0886243	0.103285	2.18759	0.334943	0.456562
ANG	5.20392	2.08366	0.887908	7.12475	0.0283714	0.0563843
ANGEL1	107.903	0.363474	0.169521	4.62582	0.098973	0.16754
ANGEL2	248.559	-0.256232	0.114178	6.93277	0.0312297	0.0613696
ANGPT1	273.451	-4.45273	0.181401	1789.02	0	0
ANGPT2	2.97983	-0.930624	1.02137	1.00034	0.606427	0.709574
ANGPTL1	6.67629	-0.756843	0.689897	4.08601	0.129639	0.210187
ANGPTL2	57.1119	0.13724	0.223576	16.6314	0.00024465	0.000707442
ANGPTL4	433.447	5.50941	0.191366	1581.22	0	0
ANK1	45.4656	-2.14186	0.289998	117.036	3.85433e-26	3.46843e-25
ANK2	10.3858	-0.557502	0.522746	6.16279	0.0458953	0.0862444
ANK3	45.1278	7.84979	1.19707	216.306	1.07083e-47	1.52627e-46
ANKAR	15.5214	-0.803536	0.446737	3.79929	0.149622	0.237054
ANKDD1A	40.9239	-0.746506	0.291514	6.70638	0.0349727	0.0678371
ANKDD1B	1.56644	-0.229	1.34001	0.634318	0.728215	0.807245
ANKEF1	8.89826	-5.55306	1.23331	48.7465	2.59912e-11	1.34301e-10
ANKFY1	738.468	-0.162682	0.0750674	12.1719	0.0022746	0.00566686
ANKH	603.901	1.41985	0.0832743	294.258	1.26656e-64	2.34479e-63
ANKHD1	48.033	0.0553729	0.260818	0.276431	0.870911	0.909507
ANKIB1	906.628	-0.131663	0.0620969	4.60985	0.0997663	0.16869
ANKLE1	3.33268	0.858749	0.943088	1.1266	0.569328	0.678161
ANKLE2	498.636	0.432447	0.0799074	30.6459	2.21475e-07	8.8057e-07
ANKMY1	16.3368	0.00917681	0.440988	1.52669	0.466105	0.585923
ANKMY2	149.913	-0.468064	0.148107	12.7906	0.0016694	0.00426707
ANKRA2	150.013	0.0510135	0.144197	0.907257	0.635319	0.731561
ANKRD1	3.391	-5.35338	1.38448	31.6725	1.32555e-07	5.36208e-07
ANKRD10	216.878	0.225521	0.126148	10.5269	0.00517747	0.0120508
ANKRD11	962.521	0.247837	0.0623732	16.1145	0.000316801	0.000904466
ANKRD12	820.683	-0.149554	0.0679699	5.20882	0.0739467	0.130248
ANKRD13A	851.928	-1.843	0.0732949	786.893	1.34407e-171	6.09177e-170
ANKRD13B	10.3123	-0.547599	0.535484	1.08046	0.582615	0.689198
ANKRD13C	312.649	0.236327	0.102283	8.85533	0.0119424	0.0258986
ANKRD13D	101.2	0.452074	0.189583	8.02548	0.0180837	0.0378212
ANKRD16	12.9193	-0.524906	0.488717	1.43103	0.488941	0.608098
ANKRD17	1112.05	0.187979	0.0595557	28.7067	5.84002e-07	2.2515e-06
ANKRD18B	7.12835	-1.29657	0.665255	7.51783	0.0233091	0.0473119
ANKRD19P	13.4906	0.00480149	0.484355	0.0611517	0.969887	0.975728
ANKRD23	6.73907	-0.0820653	0.696086	0.0728547	0.964228	0.971848
ANKRD24	0.90651	1.57841	1.9522	1.26593	0.531016	0.646156
ANKRD26	224.708	-0.0380452	0.124388	0.143678	0.930681	0.94943
ANKRD27	181.522	-0.277089	0.135045	4.25688	0.119023	0.195852
ANKRD28	726.228	-0.250359	0.0722245	13.3853	0.00124	0.00324196
ANKRD29	188.164	1.39597	0.138859	121.395	4.359e-27	4.03241e-26
ANKRD33B	27.0234	-2.08539	0.36001	80.0549	4.13342e-18	2.88621e-17
ANKRD34A	34.3497	-1.104	0.313721	13.2819	0.00130577	0.00339897
ANKRD35	3.16608	-1.01593	1.00037	1.11493	0.572658	0.680615
ANKRD36	16.2782	-0.764061	0.430061	5.50462	0.0637802	0.114539
ANKRD36B	7.06809	-0.683303	0.653888	1.25741	0.533281	0.647617
ANKRD36BP1	117.349	-0.212883	0.176679	6.32236	0.0423758	0.080475
ANKRD36C	32.4592	-0.856508	0.345321	7.89958	0.0192588	0.0400085
ANKRD37	4.75641	2.08196	0.918873	5.60676	0.0606048	0.109725
ANKRD39	30.2466	0.257677	0.312663	0.748331	0.687863	0.774914
ANKRD40	541.636	-0.0573028	0.0829583	4.44286	0.108454	0.181033
ANKRD42	179.83	0.295144	0.139221	11.3865	0.00336866	0.00811355
ANKRD44	132.73	1.72699	0.154206	149.296	3.809e-33	4.07078e-32
ANKRD45	1.0264	-3.26022	1.80961	4.3234	0.115129	0.190485
ANKRD46	101.174	0.97014	0.192729	28.3107	7.11884e-07	2.72333e-06
ANKRD49	67.0556	-0.122653	0.223511	2.81077	0.245273	0.357368
ANKRD50	742.874	0.506279	0.0762562	46.5933	7.62772e-11	3.84385e-10
ANKRD52	861.462	0.287957	0.0668546	19.2091	6.74211e-05	0.00020999
ANKRD53	1.30691	-3.64803	1.66426	6.04849	0.0485946	0.0905045
ANKRD54	107.312	0.481777	0.174293	7.8731	0.0195154	0.0404907
ANKRD6	4.948	0.160375	0.772599	0.0937399	0.954211	0.964921
ANKRD61	5.32663	-0.748378	0.751996	2.57751	0.275613	0.391829
ANKRD65	0.941978	0.127556	1.77993	0.66022	0.718845	0.799637
ANKRD9	66.9953	-0.277313	0.217433	1.91658	0.383549	0.50647
ANKS1A	155.195	0.396817	0.152455	14.7063	0.000640575	0.00174698
ANKS1B	2.72807	-1.63838	1.16154	2.12685	0.345271	0.467255
ANKS3	29.9701	-0.423874	0.331221	4.93947	0.0846075	0.146338
ANKS6	62.2641	-0.320353	0.223536	9.40058	0.00909265	0.0201869
ANKZF1	47.9367	0.152012	0.24394	1.28331	0.52642	0.642052
ANLN	527.866	-4.64249	0.148945	1813.58	0	0
ANO10	485.95	0.362501	0.0845273	72.7816	1.56921e-16	1.03818e-15
ANO3	11.3105	-1.74508	0.572797	13.0875	0.00143905	0.00372244
ANO4	51.0131	-2.45264	0.288038	125.338	6.069e-28	5.75761e-27
ANO6	1138.43	-0.35074	0.0600785	49.1233	2.15284e-11	1.11707e-10
ANO7	7.88915	2.67189	0.744427	14.8615	0.000592738	0.00162516
ANO8	21.6063	1.16695	0.375134	10.1168	0.00635576	0.014491
ANOS1	259.168	6.39798	0.337865	1048.64	1.95752e-228	1.15022e-226
ANP32A	240.571	-0.292399	0.118318	6.2459	0.0440271	0.0831225
ANP32A.IT1	3.71844	1.45629	0.997166	4.10244	0.128578	0.208787
ANP32AP1	11.0488	-0.489819	0.56281	0.992776	0.608725	0.711144
ANP32B	445.144	-1.16512	0.0910628	170.257	1.06926e-37	1.25657e-36
ANP32C	4.99908	-0.173217	0.801086	0.907987	0.635087	0.731536
ANP32D	1.58645	0.161449	1.43545	0.424547	0.808743	0.867695
ANP32E	583.968	-0.252151	0.0806569	10.0626	0.00653016	0.0148595
ANPEP	10641.1	2.12448	0.0376324	4415.69	0	0
ANTXR1	1198.01	-0.705063	0.0680672	123.897	1.24744e-27	1.17147e-26
ANTXR2	919.981	0.616735	0.0640979	215.176	1.88437e-47	2.66791e-46
ANXA1	8525.78	1.19147	0.0372465	1013.52	8.25667e-221	4.70282e-219
ANXA10	183.637	5.454	0.341675	768.015	1.68936e-167	7.40829e-166
ANXA11	527.084	-0.635152	0.0837802	82.948	9.72923e-19	6.96699e-18
ANXA2	3684.7	-0.0189554	0.0382032	180.194	7.43604e-40	9.15101e-39
ANXA2P1	96.9475	-0.123319	0.191103	9.81398	0.00739472	0.016651
ANXA2P2	1851.9	-0.118007	0.0478175	84.9672	3.5449e-19	2.57191e-18
ANXA2P3	39.5062	-0.143747	0.273904	3.86913	0.144487	0.230367
ANXA2R	10.9478	2.00125	0.567479	13.2712	0.00131278	0.00341604
ANXA3	10.5148	-3.98053	0.841433	43.3462	3.86801e-10	1.8718e-09
ANXA4	538.705	-0.100748	0.0857624	22.0391	1.63786e-05	5.4876e-05
ANXA5	4019.83	-0.593538	0.0386533	237.063	3.32938e-52	5.11307e-51
ANXA6	1148.99	-0.731123	0.0572583	258.133	8.85418e-57	1.45766e-55
ANXA7	880.155	-0.0014034	0.063449	0.706141	0.702528	0.786547
ANXA9	4.4854	0.468969	0.820532	0.333574	0.84638	0.893183
AOC2	4.66602	0.383168	0.803962	0.600855	0.740502	0.817124
AOC3	1.34863	2.75949	1.73263	2.83369	0.242478	0.354059
AOX1	180.515	-2.57173	0.1654	286.271	6.87013e-63	1.23347e-61
AP1AR	561.796	1.43502	0.0851354	380.263	2.67306e-83	6.28762e-82
AP1B1	379.642	-0.267107	0.0934849	15.8812	0.000355992	0.00100953
AP1G1	970.018	-0.0534204	0.0656014	10.7034	0.00474005	0.0111004
AP1G2	30.6913	-0.672733	0.307953	7.74329	0.0208241	0.0428709
AP1M1	316.66	-0.045866	0.101964	3.89839	0.142388	0.227509
AP1S1	275.747	0.408674	0.111777	18.5906	9.1855e-05	0.000281028
AP1S2	178.402	0.472156	0.13256	32.6967	7.94334e-08	3.27834e-07
AP1S3	44.7219	-1.15599	0.260939	64.3927	1.04066e-14	6.36906e-14
AP2A1	332.233	-0.043961	0.0975641	4.97123	0.0832745	0.144305
AP2A2	23.4423	0.513666	0.354886	2.56673	0.277103	0.393525
AP2B1	1099.06	-0.387864	0.0643681	41.555	9.47207e-10	4.4816e-09
AP2M1	1975.72	-0.112479	0.0451273	40.5154	1.5929e-09	7.41392e-09
AP2S1	492.579	0.636876	0.0797628	64.0646	1.22614e-14	7.48267e-14
AP3B1	774.869	0.429127	0.0671717	42.5058	5.88825e-10	2.82006e-09
AP3D1	1033.81	0.10589	0.0610763	11.5554	0.00309589	0.00752018
AP3M1	592.77	-0.0811216	0.0755396	7.36675	0.025138	0.0506715
AP3M2	127.7	-0.318017	0.163407	5.04683	0.0801855	0.139648
AP3S1	472.557	-0.219889	0.0864172	7.31731	0.0257671	0.0517991
AP3S2	6.82982	-0.598716	0.670839	2.1094	0.348297	0.470323
AP4B1	42.4084	-0.465998	0.283159	2.87527	0.237489	0.348108
AP4B1.AS1	4.34536	0.227979	0.903376	2.86546	0.238657	0.349509
AP4E1	300.235	0.035086	0.110584	0.266958	0.875046	0.91203
AP4M1	41.7212	1.24666	0.288671	18.9214	7.78522e-05	0.000240764
AP4S1	41.1261	-0.0815218	0.275586	0.384714	0.825012	0.87843
AP5B1	104.689	0.741929	0.17632	19.925	4.7135e-05	0.000149628
AP5M1	389.396	-0.172867	0.0911183	4.09337	0.129162	0.209575
AP5S1	46.7078	0.199406	0.249319	1.26376	0.531593	0.64645
AP5Z1	145.182	0.510186	0.145507	13.9327	0.000943105	0.00251078
APAF1	305.594	-0.0432893	0.102897	5.82764	0.054268	0.099488
APBA1	14.2167	0.93747	0.528757	16.0436	0.000328228	0.000935296
APBA2	1.41655	-0.443693	1.4158	0.224922	0.893632	0.92467
APBA3	41.0119	0.0281059	0.271451	0.0576361	0.971593	0.976982
APBB1	159.699	0.469521	0.137304	11.9503	0.00254114	0.00626582
APBB1IP	325.316	-0.421915	0.104705	19.2108	6.73625e-05	0.000209851
APBB2	772.224	0.0535048	0.0724837	173.843	1.78011e-38	2.12215e-37
APBB3	21.928	-0.246364	0.377796	3.00039	0.223086	0.330465
APC	530.069	-0.589938	0.0817361	53.648	2.24126e-12	1.22585e-11
APC2	9.99936	1.18114	0.553105	9.27053	0.00970356	0.0214343
APCDD1	22.2849	-2.54218	0.443851	53.7878	2.08987e-12	1.146e-11
APCDD1L	591.682	2.24635	0.0900506	710.645	4.84682e-155	1.96329e-153
APCDD1L.DT	46.4393	1.53888	0.281824	34.1033	3.93159e-08	1.66137e-07
APEH	191.026	-0.504662	0.128356	16.4572	0.000266916	0.000768986
APEX1	506.918	-0.135356	0.0805196	4.22358	0.121021	0.198423
APEX2	67.0796	0.0250002	0.215313	1.09949	0.577096	0.684656
APH1A	304.48	-0.315514	0.113648	8.51801	0.0141364	0.0302202
APH1B	291.741	0.937819	0.108941	74.5515	6.47655e-17	4.3311e-16
API5	691.591	-0.135436	0.0712285	6.37849	0.0412029	0.0785868
APIP	158.534	0.455007	0.147068	17.9416	0.000127064	0.000381989
APLF	26.1751	-0.352764	0.340972	1.14145	0.565115	0.675105
APLP1	18.0813	-0.159396	0.387009	7.98749	0.0184306	0.0384763
APLP2	6436.16	0.848395	0.0366951	637.078	4.57402e-139	1.6707e-137
APMAP	468.245	0.335747	0.0827446	20.6095	3.34734e-05	0.000107966
APOA1.AS	1.03361	0.377234	1.65528	0.493958	0.781157	0.847332
APOBEC2	0.984324	-0.0642774	1.70664	3.86797	0.144571	0.230477
APOBEC3B	4.70789	-5.27124	1.35036	18.8656	8.00561e-05	0.000247065
APOBEC3C	94.0591	-0.491429	0.182047	17.9998	0.000123421	0.000371262
APOBEC3D	3.96076	0.262537	0.886696	0.575614	0.749906	0.824381
APOBEC3F	13.7424	0.260849	0.459998	7.91656	0.0190959	0.0397146
APOBEC3G	12.1327	0.745648	0.492356	3.4125	0.181545	0.278836
APOC1	1.23932	0.692998	1.55358	0.382887	0.825766	0.879107
APOD	8.26717	-0.569508	0.611507	1.49411	0.47376	0.593538
APOE	1.9026	-1.76969	1.39455	1.72489	0.422129	0.544832
APOL1	15.9098	-2.6418	0.513382	64.1368	1.1827e-14	7.22349e-14
APOL2	77.7568	-0.391779	0.187655	91.3693	1.44351e-20	1.09263e-19
APOL3	5.41579	-1.85764	0.795286	10.903	0.00428994	0.0101101
APOL6	141.578	-1.20358	0.160027	115.6	7.90339e-26	7.05657e-25
APOLD1	74.1559	-1.38849	0.206844	74.5298	6.54715e-17	4.37634e-16
APOO	27.0683	0.0529285	0.330391	2.59163	0.273675	0.389699
APOOL	224.372	-0.361517	0.123843	8.84209	0.0120217	0.0260441
APOPT1	156.966	0.185393	0.140722	1.9375	0.379557	0.502403
APP	4372.6	0.547929	0.041545	213.579	4.18767e-47	5.88412e-46
APPBP2	666.838	-0.149099	0.0796751	3.9411	0.13938	0.223519
APPL1	489.666	0.381632	0.0825768	28.5883	6.19622e-07	2.38326e-06
APPL2	617.017	-0.81637	0.0746495	132.237	1.92773e-29	1.8966e-28
APRT	246.928	0.166788	0.117499	6.61826	0.0365479	0.0705759
APTR	22.111	-0.667302	0.368778	6.03095	0.0490225	0.0911417
APTX	119.018	-0.0680948	0.166593	2.02355	0.363573	0.486328
AQP1	1.71591	-2.02144	1.38735	3.25413	0.196506	0.298282
AQP11	11.7815	0.115018	0.504234	0.65957	0.719078	0.799837
AQP3	1.04418	-1.53684	1.76894	0.737194	0.691704	0.777911
AQR	340.086	0.0477237	0.0992507	0.24728	0.883698	0.918033
AR	199.79	-0.667608	0.124234	57.3	3.60969e-13	2.05837e-12
ARAF	160.91	-0.082242	0.14194	2.22597	0.328577	0.449865
ARAP1	391.166	0.859882	0.101248	105.359	1.32335e-23	1.10709e-22
ARAP1.AS2	3.37194	1.44578	0.995649	2.25442	0.323935	0.444985
ARAP3	131.514	1.16346	0.17195	74.8262	5.6455e-17	3.78216e-16
ARC	1.98445	3.75185	1.61831	9.37132	0.00922663	0.0204568
ARCN1	2575.84	0.563285	0.0456605	159.887	1.90944e-35	2.14394e-34
AREG	431.148	2.62285	0.117812	769.058	1.00282e-167	4.43689e-166
AREL1	333.032	0.983486	0.102659	99.601	2.35466e-22	1.89315e-21
ARF1	2796.21	0.256656	0.0409285	103.391	3.53926e-23	2.92142e-22
ARF3	818.294	0.451507	0.0684608	49.796	1.53794e-11	8.0475e-11
ARF4	3669.05	0.173261	0.0434899	17.2322	0.000181165	0.00053278
ARF4.AS1	1.5443	-1.99697	1.46665	3.13451	0.208617	0.312852
ARF5	188.297	0.0175333	0.12769	2.95259	0.228482	0.336966
ARF6	844.702	-0.97326	0.0675344	282.42	4.71301e-62	8.33099e-61
ARFGAP1	371.378	0.348542	0.0955379	14.5448	0.000694442	0.001888
ARFGAP2	138.474	-0.280031	0.151018	3.43437	0.179571	0.276489
ARFGAP3	681.543	0.215059	0.0713076	13.7654	0.00102538	0.00271764
ARFGEF1	676.68	0.00109743	0.0719918	3.41339	0.181464	0.27874
ARFGEF2	831.347	0.119536	0.0659142	17.3695	0.000169148	0.000499415
ARFGEF3	1.37164	1.34364	1.54055	1.74658	0.417575	0.54031
ARFIP1	456.581	0.107342	0.0887775	2.79576	0.247121	0.359426
ARFIP2	208.735	0.426461	0.124797	13.9258	0.000946358	0.00251854
ARFRP1	96.4305	-0.210174	0.181783	1.62483	0.443785	0.565419
ARG2	158.979	1.46271	0.149417	109.367	1.78382e-24	1.52667e-23
ARGLU1	522.118	-0.23728	0.0785173	10.0013	0.00673348	0.0152964
ARHGAP1	518.92	-0.137374	0.0827456	2.89963	0.234614	0.344539
ARHGAP10	188.862	-0.25485	0.128939	4.18941	0.123107	0.201398
ARHGAP11A	1.37695	-0.498755	1.4966	0.204852	0.902645	0.930886
ARHGAP12	482.515	-0.151171	0.0846455	7.63179	0.022018	0.0450047
ARHGAP17	212.165	-0.358019	0.121553	26.2808	1.96427e-06	7.18878e-06
ARHGAP18	810.278	-0.184436	0.0717971	50.7146	9.71559e-12	5.14359e-11
ARHGAP19	95.9848	1.11132	0.182002	41.6234	9.15351e-10	4.3364e-09
ARHGAP20	23.424	-4.52657	0.61592	162.922	4.18676e-36	4.78405e-35
ARHGAP21	1139.97	0.722258	0.0611119	232.638	3.04275e-51	4.62038e-50
ARHGAP22	498.724	1.57938	0.0888263	481.153	3.30355e-105	9.4808e-104
ARHGAP22.IT1	1.07821	0.740331	1.80344	0.766946	0.68149	0.769347
ARHGAP23	13.9671	0.00724739	0.472974	0.00114407	0.999428	0.999428
ARHGAP24	418.592	0.728325	0.0949337	133.331	1.11547e-29	1.10183e-28
ARHGAP26	41.0945	1.25174	0.280032	25.0682	3.60168e-06	1.28801e-05
ARHGAP27P1	16.7076	0.803401	0.433269	4.03616	0.13291	0.214695
ARHGAP27P1.BPTFP1.KPNA2P3	82.7985	1.48176	0.208147	53.9942	1.88499e-12	1.03786e-11
ARHGAP28	5.94117	1.5713	0.730434	4.76136	0.0924876	0.158055
ARHGAP29	1634.48	-3.18093	0.0658753	3099.69	0	0
ARHGAP31	238.925	0.735075	0.119876	75.7423	3.57086e-17	2.4031e-16
ARHGAP32	124.867	0.272799	0.158571	3.10845	0.211353	0.316411
ARHGAP33	9.71476	-2.4821	0.667566	18.7991	8.276e-05	0.00025467
ARHGAP35	512.368	-0.779217	0.087059	88.5012	6.05637e-20	4.48824e-19
ARHGAP39	29.8088	0.87654	0.323338	7.72097	0.0210578	0.0432952
ARHGAP42	33.5964	0.71297	0.304117	5.77033	0.0558454	0.102141
ARHGAP44	13.1844	-0.425174	0.481536	1.66088	0.435856	0.557707
ARHGAP45	7.81069	-0.184619	0.621561	0.227805	0.892345	0.92392
ARHGAP5	1931.03	1.15174	0.0569938	429.603	5.16328e-94	1.37558e-92
ARHGAP5.AS1	37.2334	2.97008	0.350644	86.5137	1.63603e-19	1.19927e-18
ARHGAP6	12.6563	-0.774527	0.488755	8.07897	0.0176065	0.0369009
ARHGAP9	0.948806	-0.331019	1.9387	1.23081	0.540422	0.653906
ARHGDIA	690.899	-0.213182	0.0702171	10.524	0.00518481	0.0120655
ARHGDIB	5.63134	-3.02178	0.931338	17.2631	0.000178385	0.000525124
ARHGEF1	173.681	0.225144	0.135281	2.84855	0.240682	0.351887
ARHGEF10L	47.8433	0.393278	0.259567	4.80101	0.0906723	0.155543
ARHGEF11	233.905	0.472581	0.114414	19.7111	5.24548e-05	0.000165343
ARHGEF12	1957.96	-0.130665	0.0491869	7.21529	0.0271156	0.0541443
ARHGEF17	405.889	-0.833393	0.0901785	104.123	2.45412e-23	2.03531e-22
ARHGEF18	124.508	0.172183	0.158142	1.20558	0.547282	0.659044
ARHGEF19	13.8836	0.22514	0.480904	0.444582	0.800682	0.861845
ARHGEF2	252.454	-0.158986	0.118093	13.2402	0.00133332	0.00346403
ARHGEF25	66.885	-0.0369381	0.22194	0.0635107	0.968744	0.974974
ARHGEF28	251.2	-0.59012	0.122299	25.2634	3.26686e-06	1.17392e-05
ARHGEF3	42.0295	1.54575	0.277093	32.7738	7.64286e-08	3.15871e-07
ARHGEF33	3.77126	-2.51172	1.0784	7.75419	0.0207109	0.0426862
ARHGEF35	1.04882	-2.01969	1.77108	1.58001	0.453842	0.574257
ARHGEF37	1.69916	-2.96364	1.58601	7.1722	0.0277062	0.0551675
ARHGEF38	3.22789	-1.19212	0.976668	3.17394	0.204544	0.30808
ARHGEF39	7.72727	-0.874978	0.696863	2.50398	0.285935	0.403485
ARHGEF4	7.33468	-1.90038	0.733618	8.84776	0.0119876	0.0259854
ARHGEF40	351.143	0.425527	0.0967987	19.5471	5.69367e-05	0.000178457
ARHGEF5	0.894407	-2.95086	1.94013	2.96041	0.227591	0.335818
ARHGEF6	90.0731	1.27175	0.18897	46.8109	6.84127e-11	3.45926e-10
ARHGEF7	348.67	0.313912	0.0946039	12.4499	0.00197945	0.00499094
ARHGEF9	46.2715	-0.705555	0.255014	8.82657	0.0121153	0.0262317
ARID1A	411.586	-0.507871	0.0958671	28.0604	8.06791e-07	3.07138e-06
ARID1B	386.037	0.275776	0.0947283	14.2396	0.000808916	0.00217653
ARID2	216.412	-0.102807	0.119211	0.750412	0.687148	0.774226
ARID3A	113.432	0.395144	0.174385	5.41603	0.0666691	0.119123
ARID3B	19.901	0.90498	0.400946	8.5365	0.0140063	0.0299852
ARID4A	251.033	-0.0812237	0.112074	0.728516	0.694712	0.78031
ARID4B	589.064	0.093221	0.0783013	5.68226	0.0583597	0.106086
ARID5A	71.5123	0.522174	0.209084	7.29688	0.0260317	0.052232
ARID5B	1382.38	-1.05341	0.0565449	420.996	3.81934e-92	1.00138e-90
ARIH1	652.242	0.171002	0.0724752	12.7438	0.00170895	0.00436366
ARIH2	431.138	0.0677827	0.0883866	2.38958	0.302768	0.422188
ARIH2OS	1.10863	-0.0669901	1.74957	0.102575	0.950005	0.962304
ARL1	1214.06	0.183559	0.0598587	11.7628	0.00279086	0.00683621
ARL10	50.6829	-0.23314	0.264018	6.69462	0.0351789	0.0681838
ARL13A	1.21355	2.01151	1.72251	2.02251	0.363762	0.486434
ARL13B	127.53	-0.819114	0.167539	26.8254	1.49599e-06	5.55013e-06
ARL14EP	223.07	-0.461467	0.124244	15.5527	0.000419548	0.00117724
ARL15	91.2388	0.0703412	0.181208	0.492787	0.781615	0.847519
ARL16	92.1081	-0.0913648	0.18139	0.540979	0.763006	0.834217
ARL17A	6.015	-0.307787	0.726362	1.07477	0.584273	0.690555
ARL2	66.2679	-0.293609	0.212766	4.19266	0.122906	0.201181
ARL2BP	599.492	-0.346935	0.0780167	35.8019	1.68159e-08	7.27337e-08
ARL3	190.054	0.370272	0.126495	11.4329	0.00329138	0.007947
ARL4A	14.3429	-0.0406082	0.454716	2.37997	0.304226	0.423824
ARL4C	198.606	1.78183	0.129828	211.704	1.06898e-46	1.49356e-45
ARL4D	35.554	-1.40272	0.296503	63.4515	1.66606e-14	1.01175e-13
ARL5A	665.56	0.289431	0.0814315	40.3949	1.69183e-09	7.85714e-09
ARL5B	716.307	1.59894	0.0829198	373.653	7.28182e-82	1.67572e-80
ARL6	122.042	0.454157	0.158687	8.22145	0.0163959	0.0346075
ARL6IP1	720.721	-0.36181	0.067753	35.912	1.59147e-08	6.89761e-08
ARL6IP4	164.5	-0.33352	0.143539	9.84958	0.00726424	0.016377
ARL6IP5	1289.42	0.352868	0.0539896	207.74	7.76038e-46	1.06721e-44
ARL6IP6	245.428	-0.641368	0.117819	35.6977	1.77147e-08	7.64874e-08
ARL8A	81.1506	0.726126	0.195303	15.8809	0.000356046	0.00100953
ARL8B	1340.18	1.05748	0.0599688	363.86	9.74641e-80	2.1561e-78
ARMC1	384.621	-0.175687	0.0933348	8.65104	0.0132267	0.0284597
ARMC10	27.0337	1.71678	0.368192	23.1662	9.32248e-06	3.20583e-05
ARMC2	9.84411	-0.174138	0.553712	1.57483	0.45502	0.575541
ARMC4	34.6031	-3.52113	0.406539	174.089	1.57424e-38	1.88275e-37
ARMC5	40.9982	0.164705	0.272028	0.379841	0.827025	0.87969
ARMC6	105.591	-0.0668489	0.17231	3.56775	0.167986	0.261079
ARMC7	24.8498	-0.0671945	0.335381	3.5556	0.16901	0.262429
ARMC8	197.261	-0.161931	0.125617	8.40098	0.0149882	0.0319311
ARMC9	619.144	-0.167543	0.0778803	36.1799	1.392e-08	6.05247e-08
ARMCX1	339.573	0.356172	0.0964078	23.8774	6.53258e-06	2.28771e-05
ARMCX2	397.431	-0.38153	0.089958	20.9066	2.88535e-05	9.36336e-05
ARMCX3	848.488	-0.0603432	0.062075	37.7561	6.32961e-09	2.81809e-08
ARMCX4	143.804	-0.277301	0.144114	5.39351	0.0674238	0.120226
ARMCX5	52.0581	-0.293695	0.247677	1.4097	0.494184	0.612926
ARMCX5.GPRASP2	8.66542	-0.470955	0.598643	0.717316	0.698613	0.783404
ARMCX6	23.9058	0.0275934	0.367775	0.215025	0.898065	0.927708
ARMH1	1.15521	-3.76461	1.78348	9.6292	0.00811045	0.0181609
ARMH3	146.769	0.337661	0.1607	9.13985	0.0103587	0.0227497
ARMH4	13.5562	0.708383	0.468833	2.456	0.292878	0.410631
ARMT1	666.141	0.463854	0.0790825	63.388	1.7198e-14	1.04268e-13
ARNT	264.186	0.362356	0.108974	11.4483	0.00326619	0.0078913
ARNT2	166.582	-0.877725	0.140982	46.9404	6.41254e-11	3.24911e-10
ARNTL	93.3449	0.626938	0.179832	12.6055	0.0018313	0.00465291
ARNTL2	678.517	0.959207	0.0789246	224.771	1.55477e-49	2.29983e-48
ARNTL2.AS1	1.45137	-1.5098	1.7549	2.15423	0.340576	0.462248
ARPC1A	736.811	1.20782	0.0713388	289.596	1.30336e-63	2.38032e-62
ARPC1B	1141.84	0.850235	0.0650967	234.067	1.48966e-51	2.27364e-50
ARPC2	2355.84	-0.0622489	0.0538626	1.47407	0.47853	0.598354
ARPC3	725.136	-0.0010634	0.0702497	4.35479	0.113336	0.188021
ARPC4	600.851	-0.166556	0.0755473	5.23405	0.0730197	0.128798
ARPC5	2654.96	0.14133	0.045081	9.96604	0.00685333	0.0155284
ARPC5L	333.793	0.949076	0.103903	129.745	6.70195e-29	6.50759e-28
ARPIN	72.9307	-1.45291	0.218157	62.9973	2.09076e-14	1.26347e-13
ARPP19	1591.88	0.143021	0.0539032	18.4472	9.86846e-05	0.000300503
ARR3	1.09545	-1.53263	1.88115	0.560834	0.755469	0.828953
ARRB1	83.2872	1.70413	0.220266	65.8441	5.03656e-15	3.12494e-14
ARRB2	12.6183	-0.0948332	0.502868	0.176222	0.915659	0.939866
ARRDC1	56.4011	0.549876	0.229507	6.26185	0.0436774	0.0825671
ARRDC1.AS1	9.35543	-0.542732	0.574915	1.80122	0.406322	0.529637
ARRDC2	43.2649	0.173002	0.27027	0.996336	0.607643	0.710296
ARRDC3	170.391	0.0738986	0.134959	71.4373	3.07325e-16	2.01619e-15
ARRDC3.AS1	1.83063	-0.78007	1.30584	0.458834	0.794997	0.8579
ARRDC4	432.596	-0.0364644	0.0913046	11.9333	0.00256285	0.00631307
ARSA	90.3949	-0.223132	0.175412	17.7483	0.000139958	0.000418382
ARSB	401.604	1.11365	0.0959173	138.736	7.47816e-31	7.63008e-30
ARSD	39.6507	-0.59433	0.267898	14.7545	0.000625318	0.00170976
ARSE	5.40651	-1.38371	0.814116	2.99486	0.223704	0.331168
ARSG	94.2919	2.26894	0.207689	133.83	8.69265e-30	8.60925e-29
ARSI	18.9808	1.0662	0.410717	7.40201	0.0246987	0.0498669
ARSJ	523.218	0.263099	0.0804907	10.9216	0.00425017	0.010029
ARSK	205.157	-0.124551	0.123513	13.8489	0.00098343	0.00261066
ARTN	1.41176	1.29409	1.35788	4.80967	0.0902805	0.155032
ARV1	106.755	-0.289098	0.167245	12.7164	0.00173251	0.00441775
ARVCF	13.1184	0.41378	0.46728	8.39224	0.0150539	0.032048
ASAH1	347.378	0.484277	0.100256	89.0717	4.55321e-20	3.39118e-19
ASAH2	1.69635	-0.242753	1.28392	0.330706	0.847594	0.893626
ASAH2B	19.8808	-0.448096	0.395409	2.05562	0.357789	0.480261
ASAP1	1658.53	-0.907477	0.0558537	270.799	1.57296e-59	2.68468e-58
ASAP1.IT2	2.31032	-0.28819	1.12295	0.14841	0.928481	0.94806
ASAP2	683.958	0.0615894	0.0744894	50.2792	1.20783e-11	6.36272e-11
ASAP3	34.1908	-0.838297	0.293099	29.0276	4.97432e-07	1.92925e-06
ASB1	709.009	1.41694	0.0736453	447.788	5.80972e-98	1.57893e-96
ASB13	19.384	0.0835464	0.399919	0.586012	0.746018	0.821431
ASB14	3.89796	0.0936672	0.867155	0.23156	0.890671	0.92302
ASB16	3.94313	0.0600686	0.852494	2.2899	0.31824	0.438945
ASB16.AS1	28.149	0.729437	0.34049	5.1162	0.0774516	0.135531
ASB3	45.7704	0.606037	0.269904	5.1806	0.0749976	0.131755
ASB5	1.10167	-1.16657	1.65389	1.36862	0.504439	0.621724
ASB6	130.125	0.0497692	0.153004	2.2079	0.331559	0.453112
ASB7	159.179	-0.0872271	0.148821	1.74643	0.417608	0.54031
ASB8	144.829	-0.459439	0.14622	17.6713	0.000145456	0.00043386
ASCC1	90.0037	-0.530115	0.189106	9.38433	0.00916681	0.0203363
ASCC2	174.044	-0.0728116	0.142071	6.66147	0.0357668	0.0691969
ASCC3	1615.83	-1.05009	0.0530424	483.615	9.64438e-106	2.7948e-104
ASF1A	157.682	-0.287997	0.150799	6.97863	0.0305218	0.0601455
ASF1B	18.1477	-3.72432	0.634542	53.2114	2.78796e-12	1.51539e-11
ASGR1	2.86283	1.18807	1.16254	3.33268	0.188937	0.288639
ASH1L	831.396	-0.110488	0.0680029	10.242	0.00597001	0.0137002
ASH1L.AS1	3.51898	-0.142359	0.885829	0.196536	0.906406	0.933292
ASH2L	138.347	-0.393506	0.149228	10.9979	0.00409103	0.00967966
ASIC1	9.54226	0.453705	0.553488	1.96294	0.374759	0.497782
ASIC3	2.6975	0.0901859	1.14644	2.38895	0.302863	0.422242
ASL	91.2379	-0.580713	0.190803	14.9696	0.000561559	0.00154538
ASNA1	199.489	0.216548	0.125568	4.07821	0.130145	0.210893
ASNS	2.67125	-1.17682	1.16915	1.36517	0.50531	0.622673
ASNSD1	258.48	-0.108027	0.110609	1.49129	0.474429	0.594275
ASPH	6715.72	-0.107198	0.0356617	22.4787	1.31464e-05	4.45588e-05
ASPHD1	49.6	1.60845	0.271896	37.3545	7.73687e-09	3.4231e-08
ASPHD2	7.52865	0.684364	0.650149	1.20219	0.54821	0.659947
ASPM	367.736	-5.31707	0.215054	1383.49	3.78627e-301	3.07577e-299
ASPN	24.8594	-3.08955	0.458878	74.2669	7.46706e-17	4.98452e-16
ASPSCR1	39.9544	-0.0578592	0.279695	0.149943	0.92777	0.947659
ASS1	263.303	1.01633	0.121463	122.904	2.04971e-27	1.91041e-26
ASTE1	26.4663	-0.747313	0.339859	5.06819	0.0793336	0.13831
ASTN2	11.5751	-0.108966	0.480006	7.79155	0.0203276	0.0419708
ASXL1	348.315	-0.221829	0.0978022	5.755	0.0562752	0.102724
ASXL2	774.685	0.844717	0.0713298	229.992	1.14233e-50	1.7223e-49
ATAD1	482.3	-0.0968813	0.0857383	1.31612	0.517854	0.634023
ATAD2	353.598	-1.31719	0.10548	160.904	1.14879e-35	1.29969e-34
ATAD2B	95.0268	-0.441736	0.185537	5.70169	0.0577956	0.10519
ATAD3A	79.2496	-0.45666	0.202898	5.21134	0.0738537	0.130113
ATAD3B	85.3731	-0.0142472	0.194213	0.155236	0.925318	0.946172
ATAD3C	0.87999	1.96272	2.10639	0.754734	0.685664	0.772847
ATAD5	50.6654	-1.25171	0.251605	34.7817	2.80062e-08	1.19227e-07
ATE1	364.159	0.575147	0.102927	51.6325	6.13979e-12	3.275e-11
ATE1.AS1	2.87358	-0.843146	1.03312	0.716018	0.699067	0.783617
ATF1	326.242	0.0383643	0.102857	3.83872	0.146701	0.233227
ATF2	592.813	0.0245417	0.0762614	8.27424	0.0159688	0.0338165
ATF3	15.5645	0.364641	0.489422	11.8322	0.00269575	0.00662085
ATF4	401.49	-0.141218	0.0992789	6.0365	0.0488867	0.0909461
ATF5	92.9068	0.00208207	0.18349	0.684213	0.710273	0.792414
ATF6	400.815	-1.00862	0.102884	99.6123	2.34136e-22	1.88347e-21
ATF6B	1.29066	1.41527	1.73697	0.822914	0.662684	0.754092
ATF7	184.484	0.448705	0.131492	12.5042	0.00192642	0.00487042
ATF7IP	393.657	-0.146086	0.0962416	2.84222	0.241446	0.35283
ATF7IP2	5.89536	-0.308248	0.692956	1.76581	0.413579	0.536358
ATG10	15.8733	-0.0477121	0.443358	2.71782	0.25694	0.37095
ATG101	146.499	0.645383	0.150263	23.6518	7.31279e-06	2.54416e-05
ATG12	751.396	0.602243	0.0729141	75.8608	3.36542e-17	2.26895e-16
ATG13	478.957	0.305848	0.0876239	52.2601	4.48599e-12	2.40754e-11
ATG14	246.38	0.197258	0.115527	5.82118	0.0544436	0.0997852
ATG16L1	160.935	0.647704	0.138381	22.3041	1.43455e-05	4.84243e-05
ATG16L2	33.5475	0.889333	0.307165	8.54568	0.0139421	0.029865
ATG2A	222.268	1.55396	0.127195	169.153	1.85751e-37	2.16919e-36
ATG2B	574.846	0.441845	0.0758772	40.2827	1.78943e-09	8.29487e-09
ATG3	315.148	-0.068487	0.104542	1.2211	0.543051	0.655861
ATG4A	86.4838	-0.421566	0.18525	6.96996	0.0306543	0.0603905
ATG4B	201.085	0.370035	0.127695	8.6822	0.0130222	0.0280429
ATG4C	67.4027	0.00668041	0.211719	0.0281498	0.986024	0.987884
ATG4D	22.6167	0.332974	0.361609	1.56394	0.457505	0.577922
ATG5	301.703	0.141096	0.104026	2.48792	0.288241	0.405699
ATG7	260.737	1.09873	0.123323	136.886	1.88607e-30	1.90867e-29
ATG9A	281.926	0.125605	0.109843	3.04992	0.21763	0.32382
ATIC	398.682	0.0277262	0.0934995	18.2528	0.000108755	0.000329411
ATL1	187.149	1.08481	0.137437	79.5372	5.35449e-18	3.71614e-17
ATL2	274.719	0.335821	0.120308	9.23776	0.00986384	0.0217593
ATL3	1767.36	0.245011	0.056887	40.0345	2.02594e-09	9.36203e-09
ATM	1424.56	0.665585	0.0539512	163.477	3.17189e-36	3.63277e-35
ATMIN	482.097	0.0452055	0.0825128	10.4593	0.00535551	0.0124321
ATN1	535.821	-0.304533	0.0875532	12.5093	0.00192152	0.00486136
ATOH8	16.986	-3.97914	1.14783	18.888	7.91643e-05	0.000244432
ATOX1	204.094	0.24104	0.124656	3.7612	0.152499	0.240689
ATP10A	38.7093	-4.08473	0.436149	213.863	3.63247e-47	5.11851e-46
ATP10D	548.32	-0.886067	0.0840894	286.495	6.14441e-63	1.10451e-61
ATP11A	156.78	0.784788	0.146516	30.1324	2.86312e-07	1.12959e-06
ATP11B	921.44	0.436752	0.0695438	50.2289	1.23858e-11	6.51779e-11
ATP11C	539.817	-0.377043	0.0807624	22.1626	1.53974e-05	5.18456e-05
ATP13A1	216.056	0.00969192	0.129299	0.0396967	0.980347	0.983722
ATP13A2	115.503	0.710423	0.173844	21.6482	1.99142e-05	6.58903e-05
ATP13A3	7660.67	1.26085	0.0383244	1909.53	0	0
ATP1A1	1165.35	0.484633	0.0629137	74.8332	5.62574e-17	3.77061e-16
ATP1A1.AS1	3.12001	-0.88939	0.952753	5.44247	0.0657934	0.117785
ATP1B1	69.2046	-0.928171	0.205542	48.1043	3.58338e-11	1.83818e-10
ATP1B3	1628.93	0.557085	0.0502492	138.836	7.1153e-31	7.26484e-30
ATP2A1	3.09121	-0.0917401	0.973711	0.0155648	0.992248	0.993183
ATP2A1.AS1	0.855342	-1.03019	1.96719	0.204406	0.902846	0.931029
ATP2A2	3673.88	-0.00907433	0.0434214	112.36	3.99311e-25	3.4898e-24
ATP2A3	76.9929	5.6019	0.436891	347.622	3.27246e-76	6.94977e-75
ATP2B1	3731.42	1.03516	0.0435145	824.223	1.0524e-179	4.98246e-178
ATP2B1.AS1	33.7095	0.707354	0.311327	7.6506	0.0218118	0.0446386
ATP2B4	5103.67	-0.8149	0.0388036	514.211	2.18994e-112	6.61702e-111
ATP2C1	1681.79	-0.340184	0.0517986	43.5091	3.56547e-10	1.73047e-09
ATP2C2	5.6501	-0.328809	0.722077	1.77977	0.410703	0.533651
ATP2C2.AS1	5.339	-0.529463	0.755158	0.606418	0.738445	0.815702
ATP5F1A	1757.05	-0.131656	0.0482138	7.50396	0.0234712	0.0475956
ATP5F1B	1930.45	0.0865134	0.0457201	13.1785	0.00137504	0.00356679
ATP5F1C	666.737	-0.31202	0.0742518	19.8173	4.97428e-05	0.000157402
ATP5F1D	110.615	-0.145312	0.173617	0.802907	0.669347	0.759407
ATP5F1E	142.91	0.347896	0.145123	5.85015	0.0536607	0.0985813
ATP5IF1	363.26	-0.141276	0.103082	10.7806	0.00456071	0.0107125
ATP5MC1	112.36	-0.23281	0.163514	6.41491	0.0404594	0.0773295
ATP5MC2	280.243	-0.464466	0.108363	18.9373	7.72361e-05	0.000239057
ATP5MC3	1021.76	0.184572	0.0597467	9.83872	0.0073038	0.0164637
ATP5MD	414.658	0.110459	0.093687	4.36408	0.112811	0.187296
ATP5ME	196.293	0.436278	0.13081	14.3908	0.000750041	0.00202656
ATP5MF	200.898	-0.109851	0.124878	1.39014	0.499039	0.617025
ATP5MG	524.981	0.35746	0.0833361	19.0971	7.13046e-05	0.000221621
ATP5MGL	7.15026	-0.184785	0.640012	0.109776	0.946591	0.959696
ATP5MPL	256.489	0.132294	0.111451	2.05064	0.358681	0.481111
ATP5PB	510.834	-0.280124	0.0827222	11.8397	0.00268567	0.00660029
ATP5PD	408.418	0.34354	0.0930863	13.6777	0.00107132	0.00283083
ATP5PF	489.817	0.095882	0.0795003	1.46618	0.480423	0.600216
ATP5PO	346.586	-0.0419893	0.099332	0.283019	0.868047	0.90729
ATP5S	38.0716	-0.692552	0.295355	5.80378	0.0549195	0.100582
ATP6AP1	471.766	0.479104	0.0858447	34.3546	3.4673e-08	1.46935e-07
ATP6AP1L	4.87062	-0.928668	0.823103	2.58052	0.275199	0.391457
ATP6AP2	1492.18	0.72928	0.053527	186.66	2.93313e-41	3.72682e-40
ATP6V0A1	341.491	1.52861	0.10363	226.552	6.38011e-50	9.51321e-49
ATP6V0A2	197.694	0.296485	0.1327	11.1752	0.00374399	0.00893532
ATP6V0B	561.598	1.21111	0.090527	192.961	1.25633e-42	1.63974e-41
ATP6V0C	953.359	0.805756	0.0701916	133.309	1.12785e-29	1.11332e-28
ATP6V0CP3	0.879512	-1.25531	1.86679	0.55519	0.757604	0.830509
ATP6V0D1	550.286	0.901674	0.0808023	135.091	4.62671e-30	4.63482e-29
ATP6V0E1	1238.12	0.152043	0.06155	26.4214	1.83088e-06	6.72045e-06
ATP6V0E2	21.4558	-1.90299	0.424684	32.4915	8.80165e-08	3.61851e-07
ATP6V0E2.AS1	1.48782	-1.47765	1.379	3.95126	0.138674	0.222555
ATP6V1A	957.263	0.263702	0.0651162	20.7313	3.14962e-05	0.000101832
ATP6V1B1	1.74215	0.716757	1.21313	1.59005	0.451569	0.572052
ATP6V1B1.AS1	1.05904	1.27419	1.83425	0.938556	0.625454	0.724312
ATP6V1B2	553.756	1.35299	0.0817598	280.804	1.05739e-61	1.85367e-60
ATP6V1C1	1247.86	1.41543	0.0625139	648.493	1.51923e-141	5.63215e-140
ATP6V1C2	6.79844	0.526278	0.681789	2.65967	0.264521	0.379609
ATP6V1D	726.256	0.495718	0.070517	53.0895	2.96314e-12	1.60943e-11
ATP6V1E1	606.776	1.10006	0.0774797	226.642	6.09981e-50	9.10439e-49
ATP6V1E2	11.5048	0.0942661	0.511092	0.344438	0.841795	0.890234
ATP6V1F	426.454	1.31297	0.0953571	194.347	6.28169e-43	8.22038e-42
ATP6V1FNB	3.40599	2.51094	1.10243	5.84553	0.0537847	0.0987724
ATP6V1G1	1191.17	1.39678	0.0612532	548.82	6.68742e-120	2.1288e-118
ATP6V1H	616.5	0.655179	0.0739333	112.604	3.5354e-25	3.09342e-24
ATP7A	446.148	1.00636	0.0904305	138.322	9.20122e-31	9.37528e-30
ATP7B	16.0953	-0.767262	0.436189	3.61854	0.163774	0.255446
ATP8A1	7.24606	1.84277	0.655416	11.3433	0.00344212	0.00827199
ATP8B1	742.68	-4.69757	0.124277	3094.46	0	0
ATP8B2	860.708	0.24865	0.0646248	30.0033	3.05394e-07	1.20201e-06
ATP8B3	5.36774	-1.8091	0.818012	6.44198	0.0399156	0.0764376
ATP8B4	2.22621	-0.400878	1.13909	0.604417	0.739184	0.816397
ATP8B5P	8.82715	-0.133256	0.617508	0.833947	0.659039	0.751267
ATP9A	314.168	-0.105543	0.103952	3.20282	0.201612	0.304497
ATP9B	54.3166	-0.0561297	0.245379	0.180867	0.913535	0.938082
ATPAF1	144.576	-0.887692	0.162336	34.9115	2.62459e-08	1.12022e-07
ATPAF2	48.6574	0.527932	0.251656	4.89206	0.0866366	0.149378
ATR	425.122	-0.273227	0.0986627	12.7418	0.00171062	0.00436643
ATRAID	239.14	-0.434379	0.114469	16.0939	0.000320069	0.000913272
ATRN	655.076	0.0661165	0.074667	6.52996	0.0381976	0.0734746
ATRX	1644.61	-0.146025	0.0492647	10.3694	0.00560163	0.0129367
ATXN1	259.173	-1.41195	0.119259	231.189	6.27867e-51	9.51465e-50
ATXN10	834.299	-0.130776	0.0672827	36.2362	1.35337e-08	5.89143e-08
ATXN1L	199.597	-0.144609	0.137547	1.24353	0.536997	0.651088
ATXN2	447.43	-0.182662	0.0888763	4.64629	0.0979652	0.166061
ATXN2L	423.329	0.151049	0.0967083	28.2304	7.41063e-07	2.83277e-06
ATXN3	215.44	0.760964	0.121236	46.6198	7.52747e-11	3.79462e-10
ATXN7	263.525	0.125663	0.11036	1.30278	0.521321	0.63732
ATXN7L1	36.1722	-1.15291	0.29899	25.1605	3.43921e-06	1.23228e-05
ATXN7L2	24.1554	-1.26038	0.362031	18.4457	9.87591e-05	0.000300666
ATXN7L3	274.499	0.494982	0.113453	24.0348	6.03808e-06	2.12053e-05
ATXN7L3B	458.128	0.000398959	0.0831593	0.363264	0.833908	0.884964
AUH	61.7318	0.1541	0.227638	4.17869	0.123768	0.202169
AUNIP	6.77153	-3.21488	0.982055	14.5285	0.000700115	0.00190307
AUP1	255.375	0.407432	0.115729	21.4734	2.17323e-05	7.16507e-05
AURKA	224.376	-1.525	0.135437	136.209	2.64621e-30	2.66702e-29
AURKAIP1	187.403	0.299087	0.125719	6.34482	0.0419025	0.0797188
AURKAP1	5.95435	-0.882323	0.83937	3.07932	0.214454	0.32012
AURKB	19.6798	-3.59637	0.572115	67.6131	2.07973e-15	1.31507e-14
AURKC	2.41532	1.03006	1.12394	1.12616	0.569452	0.678161
AUTS2	2.45619	4.74714	1.50747	11.1589	0.00377473	0.00900001
AVEN	137.462	-0.111869	0.147124	2.42045	0.29813	0.416776
AVIL	5.15798	-0.950061	0.772644	1.65993	0.436063	0.557924
AVL9	559.012	0.848889	0.079071	140.702	2.79904e-31	2.87366e-30
AVPI1	39.8295	-0.573146	0.271299	5.51119	0.0635712	0.114192
AXDND1	7.41615	0.665892	0.66221	1.25682	0.533439	0.647726
AXIN1	98.0007	0.472567	0.181364	9.56627	0.00836973	0.0186992
AXIN2	4.66843	0.143985	0.775375	0.167464	0.919678	0.942631
AXL	1818.13	-1.86395	0.0514854	1581.8	0	0
AZI2	496.844	-0.411333	0.0847078	48.5594	2.85409e-11	1.47118e-10
AZIN1	1010.66	-1.3703	0.0636814	549.814	4.06798e-120	1.29774e-118
AZIN1.AS1	0.950775	-1.55212	1.82025	0.835409	0.658557	0.750948
AZIN2	8.20565	0.492697	0.646081	1.00873	0.60389	0.707441
B2M	215.868	-0.350897	0.123266	11.1117	0.00386472	0.00918953
B3GALNT1	28.9447	-3.24418	0.438988	87.2063	1.15714e-19	8.53278e-19
B3GALNT2	287.272	-0.376017	0.105406	12.9336	0.00155418	0.00399731
B3GALT1	2.63518	3.57595	1.31044	12.5891	0.00184634	0.0046847
B3GALT2	6.64994	-4.39424	1.10035	44.7361	1.93058e-10	9.51594e-10
B3GALT6	155.521	0.233976	0.140996	2.88576	0.236247	0.346561
B3GAT3	96.1833	0.768575	0.179038	19.0427	7.32724e-05	0.000227405
B3GLCT	89.4979	-1.0381	0.188929	40.8819	1.32618e-09	6.21532e-09
B3GNT10	21.6961	-0.095798	0.375243	0.328613	0.848482	0.894006
B3GNT2	220.456	1.0373	0.128803	65.4813	6.03829e-15	3.73089e-14
B3GNT4	1.01608	-0.354499	1.58442	0.462682	0.793469	0.856686
B3GNT5	55.243	2.88984	0.282879	120.463	6.94685e-27	6.3748e-26
B3GNT8	3.3098	0.514256	0.99611	0.560539	0.75558	0.828953
B3GNT9	91.6614	-0.293871	0.185207	2.64675	0.266236	0.381517
B3GNTL1	4.40595	1.70262	0.8516	4.35509	0.11332	0.188014
B4GALNT1	20.1107	0.347795	0.359876	22.0697	1.61293e-05	5.41261e-05
B4GALNT4	9.07731	-0.362805	0.612013	0.411761	0.81393	0.870586
B4GALT1	1335.46	0.552534	0.0530454	111.431	6.35471e-25	5.51484e-24
B4GALT1.AS1	9.58821	1.38159	0.553	9.12955	0.0104122	0.0228604
B4GALT2	144.83	-0.794472	0.157324	35.5222	1.93401e-08	8.32397e-08
B4GALT3	138.905	0.709818	0.152769	30.072	2.95084e-07	1.16327e-06
B4GALT4	144.595	-1.07025	0.1552	75.9624	3.19863e-17	2.15944e-16
B4GALT5	441.316	0.29969	0.0842737	12.7113	0.00173692	0.00442789
B4GALT6	0.908304	0.626144	1.97095	0.263675	0.876484	0.912835
B4GALT7	86.4131	0.307586	0.182916	4.67622	0.0965096	0.164061
B4GAT1	101.391	0.108852	0.179112	4.15064	0.125516	0.204418
B9D1	34.9491	-0.722818	0.321639	6.61785	0.0365555	0.0705759
B9D2	11.1163	0.659742	0.525177	1.65066	0.43809	0.559842
BAALC	149.28	2.40715	0.181546	240.176	7.02211e-53	1.09195e-51
BABAM1	154.72	-0.121346	0.142775	1.92405	0.382118	0.505035
BABAM2	53.8734	-1.28129	0.249828	31.8597	1.2071e-07	4.90562e-07
BACE1	374.965	-1.07113	0.0947085	201.37	1.87491e-44	2.52011e-43
BACE1.AS	2.84134	-0.42369	1.12163	0.716727	0.698819	0.783516
BACE2	2.33568	0.681927	1.06854	2.74455	0.253529	0.366845
BACH1	1110.76	0.776756	0.0694739	245.406	5.13886e-54	8.12706e-53
BACH2	1.73013	2.08232	1.73271	3.8802	0.14369	0.229399
BAD	102.431	0.15004	0.171372	3.92093	0.140793	0.225542
BAG1	82.5816	0.961962	0.199478	23.6355	7.37255e-06	2.56315e-05
BAG2	660.805	-1.57885	0.0884141	355.184	7.45997e-78	1.62372e-76
BAG3	328.811	-0.0485748	0.0979343	2.75415	0.252316	0.365516
BAG4	394.679	0.0491835	0.0919215	0.673527	0.714078	0.795644
BAG5	344.426	0.0637983	0.0968907	3.03563	0.21919	0.325783
BAHCC1	48.6963	-0.75853	0.286129	7.75011	0.0207532	0.0427427
BAHD1	118.696	-0.0482997	0.165445	3.85956	0.14518	0.231199
BAIAP2	104.541	0.737978	0.181034	16.8057	0.000224227	0.000651682
BAIAP2.DT	56.5411	0.283672	0.223903	5.70526	0.0576923	0.105027
BAIAP2L1	30.6132	-1.55571	0.339721	24.6042	4.54225e-06	1.61235e-05
BAIAP2L2	1.59006	1.66338	1.58197	1.18517	0.552895	0.664565
BAIAP3	1.33679	-2.48472	1.66607	2.87229	0.237843	0.348524
BAK1	52.1909	0.723967	0.248107	8.94389	0.0114251	0.0248931
BAMBI	9.24998	-2.90257	0.691942	45.266	1.48119e-10	7.34712e-10
BANF1	144.733	-0.173828	0.146758	1.75565	0.415686	0.538526
BANP	54.8852	0.450098	0.23763	3.83754	0.146788	0.233291
BAP1	178.144	-0.178222	0.132787	1.91864	0.383154	0.506128
BARD1	62.383	-2.82371	0.280664	170.6	9.00763e-38	1.06023e-36
BASP1	807.867	0.576744	0.0704236	220.857	1.10006e-48	1.60171e-47
BASP1.AS1	0.953712	2.15455	1.97083	1.05724	0.589417	0.694868
BATF2	4.16014	1.40245	0.983706	2.60672	0.271618	0.387549
BATF3	5.21502	-0.992869	0.804994	1.95576	0.376108	0.499305
BAX	154.563	-0.790351	0.144318	31.1668	1.70692e-07	6.85628e-07
BAZ1A	727.26	-0.109784	0.0742519	22.948	1.0397e-05	3.55396e-05
BAZ1B	762.554	0.216779	0.0707028	22.8932	1.0686e-05	3.65105e-05
BAZ2A	570.331	0.337387	0.0802426	35.1398	2.34151e-08	1.00372e-07
BAZ2B	275.857	0.30633	0.113727	17.698	0.000143528	0.00042845
BBC3	25.5091	-0.749769	0.346031	7.75108	0.0207431	0.0427398
BBIP1	97.4188	0.468911	0.177648	7.46611	0.0239196	0.0484388
BBOF1	25.1204	-1.69839	0.368986	28.6353	6.05232e-07	2.33153e-06
BBS1	60.1677	-1.44488	0.24408	46.1972	9.29836e-11	4.66518e-10
BBS10	271.042	0.265777	0.116749	7.54405	0.0230054	0.046796
BBS12	57.3665	0.640712	0.238374	19.7164	5.23173e-05	0.000164987
BBS2	317.456	0.929784	0.105787	94.5208	2.98583e-21	2.31909e-20
BBS4	97.724	-0.247257	0.185024	4.09163	0.129275	0.209712
BBS5	35.2781	-1.25736	0.315436	16.4613	0.000266361	0.000767538
BBS7	209.628	-0.278846	0.122666	16.4819	0.000263632	0.000760114
BBS9	88.4827	0.357072	0.188367	3.6958	0.157568	0.247063
BBX	1008.5	-0.0991612	0.0592016	16.7781	0.000227337	0.000660207
BCAM	5.72536	-2.11882	0.821941	16.6659	0.000240463	0.000695742
BCAP29	1911.3	0.941755	0.0530379	538.612	1.10117e-117	3.42469e-116
BCAP31	483.313	0.477431	0.0839521	44.1033	2.64903e-10	1.29541e-09
BCAR1	341.306	-0.826478	0.114411	52.306	4.38427e-12	2.35464e-11
BCAR3	413.561	-0.0347099	0.0915847	1.4858	0.475731	0.595506
BCAS2	219.293	0.235766	0.123542	6.69121	0.0352388	0.0682821
BCAS3	59.6771	0.0499457	0.219961	1.12095	0.570938	0.679277
BCAS4	57.4068	0.107665	0.230854	3.2011	0.201786	0.304698
BCAT1	1296.66	-0.530693	0.0629269	152.932	6.18219e-34	6.71816e-33
BCAT2	68.8539	-0.292741	0.212651	4.15362	0.12533	0.204226
BCCIP	332.362	-0.0749781	0.102377	4.84565	0.0886708	0.15255
BCDIN3D	16.0887	0.396271	0.412271	1.84897	0.396736	0.519774
BCDIN3D.AS1	2.66993	-0.905127	1.0947	2.65858	0.264665	0.379742
BCKDHA	55.5909	0.0566512	0.252209	2.37413	0.305116	0.424821
BCKDHB	96.1306	-1.85651	0.18987	143.683	6.30298e-32	6.57083e-31
BCKDK	231.213	0.076271	0.121451	6.80974	0.0332111	0.0647558
BCL10	640.918	1.33653	0.0768644	319.507	4.16858e-70	8.25167e-69
BCL11A	3.16825	-2.03262	1.03647	9.50179	0.00864394	0.0192568
BCL11B	1.54781	4.19287	1.63195	7.11876	0.0284564	0.0565145
BCL2	11.6056	-0.367924	0.526525	0.522678	0.77002	0.839416
BCL2A1	42.7465	4.51899	0.692802	222.79	4.18514e-49	6.14179e-48
BCL2L1	281.001	0.43283	0.10326	22.0525	1.6269e-05	5.45454e-05
BCL2L10	1.48661	-0.0148135	1.32409	0.432505	0.805532	0.865374
BCL2L11	17.7006	1.05223	0.410018	8.88188	0.0117849	0.0255907
BCL2L12	37.4624	-0.027968	0.29171	0.363639	0.833752	0.884964
BCL2L13	505.159	0.283749	0.0833396	13.6558	0.00108312	0.00286099
BCL2L15	1.27803	-0.899276	1.58041	0.738163	0.691369	0.777686
BCL2L2	349.605	-0.0841285	0.101661	7.41142	0.0245827	0.0496464
BCL3	45.1713	-0.0968145	0.257062	0.656083	0.720333	0.800753
BCL6	162.977	-0.383514	0.150982	11.7442	0.00281696	0.00689445
BCL7A	38.4892	0.635368	0.289486	8.35024	0.0153733	0.0326647
BCL7B	191.683	0.0481231	0.136265	0.937144	0.625896	0.724654
BCL7C	51.4028	-0.229746	0.252236	1.37107	0.50382	0.621207
BCL9	57.8776	-0.145879	0.226399	1.30006	0.52203	0.637978
BCL9L	384.437	-0.0275462	0.093422	7.17692	0.0276409	0.0550681
BCLAF1	1118.3	-0.0359228	0.0578167	0.768286	0.681034	0.768969
BCLAF3	104.21	-0.566244	0.170485	15.8224	0.000366609	0.00103711
BCO2	2.74553	-2.5201	1.27993	4.40716	0.110407	0.183901
BCOR	120.031	0.267204	0.161135	4.80109	0.0906686	0.155543
BCORL1	61.6948	0.226236	0.236162	3.73829	0.154256	0.242868
BCR	199.319	0.503189	0.12915	26.2311	2.01366e-06	7.3641e-06
BCS1L	53.2436	-0.657443	0.253481	7.16429	0.027816	0.0553712
BCYRN1	1.0392	-0.950123	1.65938	1.43733	0.487401	0.606589
BDH2	154.026	-1.09623	0.154094	54.9351	1.17759e-12	6.5664e-12
BDKRB1	194.621	0.919269	0.133418	56.6525	4.98969e-13	2.82041e-12
BDKRB2	915.8	1.35094	0.0656483	522.184	4.06641e-114	1.23622e-112
BDNF	242.615	-3.68575	0.162154	1284.52	1.17237e-279	8.62796e-278
BDNF.AS	10.2983	-1.36045	0.558125	10.2958	0.00581158	0.0133863
BDP1	1.21949	2.24692	1.65555	2.3051	0.315831	0.436027
BECN1	167.205	-0.308046	0.136979	7.0809	0.0290002	0.0574593
BEGAIN	1.68647	2.32258	1.49234	2.83416	0.242421	0.354011
BEND3	27.4666	0.549069	0.352043	10.2498	0.00594687	0.0136535
BEND3P3	20.9563	-0.961158	0.392673	6.54008	0.0380049	0.0731272
BEND6	165.259	0.447626	0.133068	12.3249	0.00210705	0.00528488
BEND7	8.05654	-0.263056	0.605781	7.75414	0.0207114	0.0426862
BEST1	9.91305	0.297906	0.549161	0.426742	0.807856	0.867181
BEST3	8.19841	4.8103	1.09786	31.6743	1.32441e-07	5.35893e-07
BEST4	1.45974	1.27051	1.49433	0.816799	0.664713	0.755765
BET1	513.803	0.976312	0.0895136	131.151	3.31887e-29	3.24594e-28
BET1L	259.573	0.114256	0.109648	2.59273	0.273524	0.389558
BEX1	127.258	-0.388033	0.155664	6.61803	0.0365522	0.0705759
BEX3	1319.85	1.24659	0.0556568	547.386	1.37008e-119	4.33352e-118
BEX4	149.466	0.576295	0.144747	19.6308	5.46039e-05	0.000171543
BFSP1	28.9225	1.05426	0.330431	11.4703	0.00323034	0.0078123
BGN	307.155	0.0876384	0.104025	31.1465	1.72431e-07	6.91865e-07
BHLHE40	703.156	4.61297	0.122868	2253.71	0	0
BHLHE40.AS1	3.14419	0.763344	1.08256	0.562581	0.754809	0.828545
BHLHE41	95.8365	1.46398	0.185885	63.7582	1.42915e-14	8.70369e-14
BHMT	1.02841	1.60106	1.70507	1.02603	0.598689	0.702677
BHMT2	97.1927	0.994672	0.188345	28.6415	6.03366e-07	2.32495e-06
BICC1	572.107	-1.50639	0.0867714	353.531	1.70477e-77	3.69432e-76
BICD1	395.379	1.17057	0.0922225	164.308	2.09409e-36	2.40763e-35
BICD2	520.167	0.0838035	0.0810524	19.7355	5.18186e-05	0.000163449
BICDL1	1.14725	-1.93678	1.7424	1.40878	0.494411	0.613106
BICRA	34.7073	-0.512771	0.290736	4.17944	0.123722	0.202116
BICRAL	97.8709	-0.446146	0.176774	6.49479	0.0388753	0.0746667
BID	276.543	0.437093	0.10656	19.6912	5.29791e-05	0.000166862
BIN1	74.1927	-0.42508	0.209962	10.6121	0.00496155	0.0115863
BIN3	93.8456	-0.0113849	0.181005	0.888776	0.641217	0.736485
BIN3.IT1	1.12202	-0.253113	1.72205	0.806026	0.668303	0.758571
BIRC2	971.362	0.0707464	0.061726	10.5009	0.00524503	0.0121851
BIRC3	28.962	-1.1648	0.35065	18.0177	0.000122322	0.000368105
BIRC5	116.449	-4.41057	0.298837	392.099	7.19085e-86	1.74387e-84
BIRC6	1414.06	0.0424409	0.0627915	3.91838	0.140972	0.225732
BISPR	1.20367	-1.22729	1.55278	6.10331	0.0472807	0.0884243
BIVM	333.428	-0.00728679	0.102009	18.6669	8.84185e-05	0.000271296
BLCAP	347.57	-0.413455	0.0935139	44.2999	2.40104e-10	1.17724e-09
BLID	2.20612	-0.660364	1.30144	1.16487	0.558536	0.669379
BLK	0.898223	0.524696	2.13264	2.9802	0.22535	0.333107
BLM	20.9509	-3.20909	0.532075	49.7927	1.5405e-11	8.05525e-11
BLMH	97.7934	-0.73197	0.176744	25.5637	2.81136e-06	1.01737e-05
BLOC1S1	43.4301	-0.568459	0.266286	5.35524	0.0687264	0.122261
BLOC1S2	311.967	0.371782	0.0984716	18.5112	9.5575e-05	0.000291689
BLOC1S3	41.9588	0.502089	0.270633	4.34708	0.113774	0.188537
BLOC1S4	132.925	0.989082	0.155324	45.2186	1.51672e-10	7.51335e-10
BLOC1S6	1067.61	0.917385	0.061028	251.065	3.03342e-55	4.86986e-54
BLVRA	91.9105	-0.319053	0.178576	12.4947	0.00193562	0.00489204
BLVRB	42.8213	-0.00555411	0.26551	0.139293	0.932723	0.950808
BLZF1	449.297	0.435231	0.0905174	47.2903	5.38309e-11	2.7387e-10
BMF	4.35681	2.30569	0.951714	7.26578	0.0264396	0.0529934
BMI1	10.1987	0.0882231	0.554268	0.83245	0.659532	0.751714
BMP1	169.092	-0.0860358	0.133818	22.5464	1.2709e-05	4.31254e-05
BMP2	2032.74	6.0201	0.125163	6780.19	0	0
BMP2K	302.323	0.63458	0.110833	38.6638	4.02042e-09	1.81885e-08
BMP3	5.35997	-0.67538	0.826829	1.39195	0.498587	0.616742
BMP4	19.2881	-0.664103	0.381593	20.8429	2.97861e-05	9.65337e-05
BMP6	3.61753	5.31985	1.42905	16.4664	0.00026569	0.000765751
BMP8A	2.15626	-0.896468	1.31264	0.45729	0.795611	0.858272
BMPER	306.733	-0.00447306	0.102054	19.7599	5.11905e-05	0.000161605
BMPR1A	179.695	0.288306	0.156584	13.1595	0.0013882	0.00359591
BMPR2	1861.41	-0.10979	0.0582236	10.4171	0.00546967	0.0126635
BMS1	296.553	0.0634699	0.108177	0.976684	0.613643	0.715035
BMS1P1	10.2772	-0.378459	0.549243	0.681259	0.711323	0.793287
BMS1P14	1.78335	-1.61348	1.44431	1.79321	0.407952	0.531518
BMS1P2	5.25753	-1.0764	0.766726	2.53519	0.281508	0.398773
BMS1P20	63.5001	0.238309	0.238757	1.02387	0.599335	0.703213
BMS1P4	16.4526	-0.631748	0.456571	4.6504	0.0977641	0.165795
BMT2	321.406	-0.0257132	0.101663	15.4358	0.000444799	0.00124457
BNC1	194.218	1.81937	0.15238	280.868	1.02421e-61	1.79762e-60
BNC2	399.245	0.072675	0.0889496	3.71842	0.155796	0.244723
BNC2.AS1	3.2882	-1.06259	1.00411	2.53126	0.282062	0.399426
BNIP1	31.5758	-0.131145	0.302446	1.31594	0.517902	0.634023
BNIP2	1031.81	0.374776	0.0591546	50.9561	8.61019e-12	4.56977e-11
BNIP3	731.984	0.875288	0.151717	45.8355	1.11418e-10	5.56006e-10
BNIP3L	2987.54	1.25334	0.0472309	849.157	4.05406e-185	1.98903e-183
BNIPL	1.07635	1.01017	1.75754	1.09361	0.578795	0.686263
BOC	40.8986	0.305302	0.272094	1.44864	0.484654	0.604081
BOD1	216.465	-0.269578	0.122716	5.67801	0.0584837	0.10627
BOD1L1	788.027	-0.047392	0.0693256	25.4594	2.96181e-06	1.06792e-05
BOD1L2	1.56364	-1.58183	1.43154	1.37839	0.501979	0.619442
BOK	106.251	-0.463768	0.171103	7.90678	0.0191896	0.0398871
BOLA1	14.0163	-0.0147473	0.456496	0.00679952	0.996606	0.996827
BOLA3	173.484	-0.0777306	0.135479	0.420051	0.810564	0.868707
BOLA3.AS1	42.8519	0.376233	0.268595	3.16008	0.205967	0.309603
BOP1	98.3187	-0.459315	0.177947	7.34196	0.0254515	0.0512407
BORA	38.5236	-1.01653	0.294354	13.5623	0.00113495	0.00298887
BORCS5	78.085	1.04622	0.212915	25.6441	2.70053e-06	9.78697e-06
BORCS6	16.7215	0.348807	0.42417	2.58899	0.274036	0.390137
BORCS7	294.518	0.471099	0.104872	20.5301	3.48289e-05	0.000112046
BORCS8	37.6063	0.298977	0.278752	1.15469	0.561387	0.671857
BPGM	212.259	1.52202	0.131094	137.732	1.23545e-30	1.25624e-29
BPHL	30.9603	-0.540603	0.321442	6.32968	0.0422209	0.080222
BPNT1	194.829	0.112314	0.125516	0.807759	0.667725	0.758319
BPTF	846.513	0.37091	0.0629899	37.5354	7.06781e-09	3.13455e-08
BRAF	3503.75	0.202233	0.0433354	123.61	1.44049e-27	1.35106e-26
BRAP	176.374	0.346529	0.137372	6.46177	0.0395226	0.0757729
BRAT1	115.226	0.51379	0.173439	10.3182	0.00574685	0.0132454
BRCA1	75.3537	-2.15796	0.236423	100.51	1.49464e-22	1.20954e-21
BRCA2	91.8888	-1.27562	0.206034	40.214	1.85203e-09	8.57168e-09
BRCC3	180.17	0.331329	0.134685	6.12454	0.0467815	0.0876659
BRD1	179.341	-0.149071	0.13611	1.51942	0.467803	0.587609
BRD2	3.18091	1.18937	1.08781	1.31045	0.519325	0.635467
BRD3	166.393	-0.305001	0.138975	5.76623	0.0559603	0.102305
BRD3OS	151.981	-0.327622	0.144274	5.29987	0.0706556	0.125237
BRD4	348.857	0.270709	0.101859	15.2138	0.000497008	0.00137743
BRD7	114.543	-0.112365	0.162778	2.71258	0.257614	0.371671
BRD7P3	3.14487	0.900698	0.932699	1.49882	0.472646	0.592491
BRD8	215.141	0.02471	0.126515	4.06142	0.131242	0.212463
BRD9	126.287	-0.464039	0.156459	10.5138	0.0052115	0.0121167
BRF1	66.8218	0.0745202	0.213439	2.68032	0.261804	0.376582
BRF2	38.0066	-0.481609	0.281665	3.29322	0.192703	0.293666
BRI3	867.938	0.275152	0.065158	30.9616	1.89137e-07	7.56243e-07
BRI3BP	6.24047	-0.149304	0.673792	1.31789	0.517397	0.633733
BRICD5	1.15526	-1.29785	1.57377	1.01473	0.60208	0.705877
BRIP1	87.0091	-4.63191	0.353993	358.816	1.21357e-78	2.66483e-77
BRIX1	324.762	-0.410321	0.0988649	17.7238	0.000141686	0.000423293
BRK1	799.923	0.476247	0.0650619	54.6769	1.33989e-12	7.43793e-12
BRMS1	118.328	0.534319	0.162923	12.0992	0.00235883	0.00585023
BRMS1L	131.973	-0.36089	0.149794	6.97562	0.0305677	0.0602279
BROX	1081.86	0.30727	0.0625383	43.0986	4.37776e-10	2.11161e-09
BRPF1	67.6572	0.296353	0.213145	2.86329	0.238915	0.349854
BRPF3	399.367	0.49226	0.0987417	67.8903	1.8105e-15	1.14825e-14
BRSK1	16.5343	-0.326075	0.439323	0.815601	0.665111	0.756102
BRSK2	2.29016	2.15875	1.21611	4.06157	0.131233	0.212463
BRWD1	663.611	0.468709	0.0736488	59.0546	1.50124e-13	8.74506e-13
BRWD3	227.208	0.339788	0.120849	7.91877	0.0190748	0.0396818
BSCL2	4.11698	-0.555479	0.903545	0.669991	0.715341	0.796694
BSDC1	340.727	0.54544	0.0992529	30.3521	2.56527e-07	1.01505e-06
BSG	1325.83	0.473901	0.0559865	72.1459	2.15631e-16	1.41839e-15
BSN	1.02939	0.0705221	1.75528	0.286989	0.866325	0.906319
BST1	15.099	-2.06619	0.481929	44.824	1.84757e-10	9.11887e-10
BST2	4.36286	-2.9003	1.02102	23.8037	6.77793e-06	2.37028e-05
BTAF1	582.597	0.592156	0.0753166	69.1639	9.57742e-16	6.13962e-15
BTBD1	1306.51	0.435713	0.0631667	77.4734	1.5027e-17	1.02567e-16
BTBD10	227.525	-0.149629	0.117734	2.64286	0.266753	0.382038
BTBD11	29.6985	3.47902	0.450263	77.7156	1.33132e-17	9.10785e-17
BTBD18	1.22092	-1.04016	1.56058	0.500481	0.778614	0.845684
BTBD19	78.1683	1.2227	0.214998	36.7625	1.04022e-08	4.56431e-08
BTBD2	244.907	-0.0507556	0.114562	2.41179	0.299424	0.418193
BTBD3	347.572	-0.530974	0.0970579	48.6933	2.66924e-11	1.37877e-10
BTBD6	138.772	-0.386221	0.159194	6.74616	0.034284	0.0666665
BTBD8	4.34254	-0.243755	0.849316	0.117249	0.943061	0.957554
BTBD9	162.937	0.62595	0.144205	23.4014	8.28781e-06	2.86794e-05
BTD	52.4479	-0.630328	0.241114	23.3547	8.48381e-06	2.93098e-05
BTF3	1029.04	-0.259366	0.0629306	23.5478	7.70288e-06	2.67309e-05
BTF3L4	251.129	-0.0918868	0.109408	11.5545	0.00309727	0.0075223
BTG1	1485.73	2.00741	0.0591365	1357.77	1.46042e-295	1.14871e-293
BTG2	74.9091	-1.01841	0.209776	63.4028	1.70705e-14	1.03537e-13
BTG3	224.032	-1.24122	0.135593	112.144	4.4489e-25	3.87675e-24
BTN2A1	287.201	0.487147	0.107526	22.7164	1.16731e-05	3.97291e-05
BTN2A2	76.838	0.909854	0.207051	22.1414	1.55618e-05	5.23281e-05
BTN2A3P	14.3891	0.689478	0.447806	2.41222	0.299359	0.418141
BTN3A1	47.2158	-0.880941	0.275932	12.9033	0.00157792	0.00404716
BTN3A2	91.1801	-0.0885849	0.179269	0.303203	0.859331	0.901221
BTN3A3	37.6916	-1.11631	0.291883	46.9202	6.47736e-11	3.28083e-10
BTRC	210.587	-0.00619042	0.127147	0.691648	0.707637	0.790779
BUB1	94.7874	-4.97405	0.3911	336.184	9.96707e-74	2.04938e-72
BUB1B	59.5887	-4.22197	0.404822	175.79	6.72629e-39	8.09005e-38
BUB3	812.97	-0.406903	0.0669167	38.8873	3.59527e-09	1.63048e-08
BUD13	31.9093	-0.473743	0.30351	5.6545	0.0591753	0.107398
BUD23	130.2	-0.449065	0.1527	8.87171	0.011845	0.0257137
BUD31	134.302	0.128386	0.153322	2.95006	0.228772	0.337271
BVES	259.836	0.40202	0.11634	89.8069	3.15261e-20	2.3682e-19
BVES.AS1	2.43492	1.3539	1.30237	2.4141	0.299079	0.417906
BYSL	98.3268	-0.263921	0.186384	4.93858	0.084645	0.146361
BZW1	1084.9	0.559826	0.0639779	92.7776	7.13825e-21	5.47278e-20
BZW2	502.042	-0.138805	0.0825846	2.97749	0.225656	0.333526
C10orf105	8.13931	1.44002	0.594975	7.78373	0.0204073	0.0421119
C10orf111	2.78108	-0.88829	1.00494	7.58532	0.0225356	0.0459301
C10orf143	6.32848	0.42965	0.65305	4.02347	0.133757	0.215852
C10orf25	15.8075	-0.203333	0.446908	0.585001	0.746395	0.821614
C10orf55	3.30974	-1.07	1.07811	0.968164	0.616263	0.716795
C10orf67	3.07189	1.10611	1.0853	2.53927	0.280934	0.398204
C10orf88	140.869	0.147997	0.150106	3.32595	0.189574	0.289492
C10orf90	1.54817	2.30192	1.52252	2.64547	0.266406	0.381688
C11orf1	26.7499	-0.506086	0.339836	4.79724	0.0908432	0.155751
C11orf24	249.392	-0.462805	0.118587	20.9308	2.85053e-05	9.25848e-05
C11orf44	0.84989	-0.90662	2.02843	0.253701	0.880865	0.915923
C11orf45	3.91603	-0.0508428	0.839037	0.979124	0.612895	0.714561
C11orf49	73.9806	-0.315715	0.215457	6.80289	0.0333251	0.0649378
C11orf54	156.127	0.458653	0.145669	10.1127	0.00636869	0.0145143
C11orf58	1251.8	-0.136079	0.0562102	16.6295	0.000244875	0.000707818
C11orf65	4.28625	0.302584	0.849007	0.181279	0.913347	0.938018
C11orf68	147.781	-0.454053	0.147986	9.95442	0.00689325	0.0156069
C11orf71	10.4013	0.0126865	0.548977	0.615792	0.734992	0.812854
C11orf74	34.991	-1.01807	0.304822	15.27	0.000483236	0.00134176
C11orf80	25.1074	0.191067	0.355657	1.44049	0.486632	0.605886
C11orf87	3.62668	-1.83908	0.949857	8.21297	0.0164656	0.0347251
C11orf88	1.32613	-2.92818	1.64794	9.59392	0.0082548	0.0184563
C11orf91	43.6606	1.76218	0.299164	46.5019	7.98444e-11	4.01953e-10
C11orf95	265.7	1.16083	0.113909	119.555	1.09363e-26	9.98643e-26
C11orf96	77.2873	4.76167	0.474869	294.847	9.43718e-65	1.75366e-63
C11orf98	2.2996	1.75614	1.25602	1.98738	0.370209	0.492971
C12orf10	90.2858	0.581225	0.188134	9.99702	0.00674798	0.0153224
C12orf29	330.287	0.664126	0.103693	58.6244	1.86158e-13	1.07766e-12
C12orf4	161.864	-0.484564	0.136499	24.5799	4.5977e-06	1.63086e-05
C12orf43	62.613	0.22975	0.230432	1.41072	0.493931	0.612715
C12orf45	19.4211	-1.05347	0.422845	6.77073	0.0338653	0.0659299
C12orf49	305.374	0.987758	0.106525	92.6927	7.44802e-21	5.70733e-20
C12orf56	3.99726	5.27796	1.43125	16.0617	0.000325265	0.000927386
C12orf57	244.876	0.82486	0.113952	55.7142	7.97636e-13	4.47628e-12
C12orf60	3.54001	0.148671	0.996252	0.0500219	0.975299	0.979836
C12orf65	45.8251	-1.06142	0.276445	19.177	6.85108e-05	0.000213205
C12orf66	38.478	0.504277	0.286201	5.76846	0.0558978	0.102224
C12orf73	28.9222	1.48168	0.323685	31.784	1.25367e-07	5.08236e-07
C12orf75	4892.23	-1.92002	0.0432754	2029.13	0	0
C12orf76	23.3115	0.268524	0.353264	3.56417	0.168287	0.261471
C14orf119	389.742	0.423108	0.0954586	30.8561	1.9938e-07	7.94848e-07
C14orf132	482.512	0.210051	0.0817492	15.8168	0.000367638	0.00103962
C14orf28	49.0124	0.143639	0.246977	1.11704	0.572054	0.68015
C14orf93	12.3605	-0.983666	0.503963	4.33629	0.11439	0.189388
C15orf39	57.4097	0.508692	0.231811	5.57057	0.0617115	0.111376
C15orf40	53.9505	-0.0979217	0.236037	0.501073	0.778383	0.845557
C15orf41	62.1704	-1.80552	0.24123	81.8469	1.6872e-18	1.19154e-17
C15orf48	178.314	4.63918	0.252783	568.598	3.39212e-124	1.1206e-122
C15orf61	38.3165	-0.194532	0.292351	1.57089	0.455918	0.576431
C15orf62	5.54343	-0.354726	0.765893	2.80603	0.245855	0.358006
C15orf65	7.5806	0.922504	0.647976	2.14139	0.342771	0.464537
C16orf46	15.4469	-0.00415833	0.482265	0.695724	0.706196	0.789822
C16orf58	143.614	-0.516833	0.146603	13.5479	0.00114314	0.00300725
C16orf70	91.1868	0.396001	0.197743	4.30794	0.116023	0.191771
C16orf71	1.07066	-0.107519	1.68726	0.105951	0.948403	0.961216
C16orf72	626.583	0.506083	0.0767071	91.7281	1.20644e-20	9.15044e-20
C16orf74	18.6769	0.395799	0.454146	13.5204	0.001159	0.0030468
C16orf86	3.02211	-0.615608	1.01884	0.408077	0.815431	0.871549
C16orf87	94.086	-0.552859	0.182674	12.326	0.00210588	0.00528372
C16orf90	20.2503	-0.278578	0.4162	0.733151	0.693104	0.778997
C16orf91	40.899	0.731226	0.302408	6.23872	0.0441854	0.083379
C16orf95	8.88128	-0.324264	0.567593	1.18302	0.55349	0.665208
C17orf100	7.68474	0.849475	0.65347	2.79708	0.246957	0.359258
C17orf107	1.54516	-0.119565	1.31139	1.59565	0.450308	0.571031
C17orf51	210.966	1.14201	0.127798	117.351	3.29285e-26	2.97036e-25
C17orf53	11.5247	-0.384199	0.537781	0.658064	0.71962	0.80026
C17orf58	60.2022	-0.26073	0.221456	7.24968	0.0266534	0.05335
C17orf67	21.7659	-0.293	0.376834	0.748504	0.687803	0.774906
C17orf75	76.7353	-1.13814	0.205175	43.0924	4.39142e-10	2.11751e-09
C17orf80	113.502	-0.705046	0.166427	25.09	3.56259e-06	1.27495e-05
C17orf82	1.24466	1.02665	1.47113	1.17034	0.557012	0.668378
C17orf97	4.97405	-1.15821	0.814789	2.13447	0.343959	0.465819
C18orf21	94.0626	0.0491415	0.184114	0.753983	0.685922	0.773021
C18orf25	300.732	-0.0882636	0.101968	1.77738	0.411194	0.53415
C18orf32	4.59513	1.25139	0.858021	2.20704	0.331702	0.453179
C18orf54	89.447	-0.852736	0.186283	41.3406	1.05441e-09	4.97299e-09
C18orf65	3.94433	1.36234	0.895795	2.3853	0.303416	0.422854
C19orf12	282.125	0.0595278	0.110244	1.83258	0.4	0.522944
C19orf18	3.15301	0.120926	0.956065	0.154209	0.925793	0.946485
C19orf24	99.9312	0.665919	0.173998	17.3022	0.000174934	0.000515578
C19orf25	70.5162	-0.120915	0.214836	1.82919	0.400678	0.523633
C19orf38	0.915975	2.05003	1.95791	1.08289	0.581907	0.68868
C19orf44	21.6258	0.0613277	0.367106	0.136888	0.933846	0.951284
C19orf47	44.8133	-0.111688	0.285004	0.407759	0.815561	0.871549
C19orf48	53.9756	-0.948738	0.244256	18.3125	0.000105557	0.000320574
C19orf53	308.647	0.84106	0.103698	66.3584	3.89451e-15	2.43157e-14
C19orf54	16.9703	-0.00138349	0.40491	1.12723	0.569148	0.67807
C19orf66	106.105	0.195009	0.17664	2.01852	0.364489	0.487231
C19orf70	69.1125	0.114304	0.208498	1.95383	0.37647	0.499474
C19orf71	15.2882	0.946247	0.455324	4.59115	0.100703	0.170023
C19orf73	0.987438	1.10332	1.81774	0.619906	0.733481	0.811425
C1D	183.994	-0.0592796	0.132345	5.98906	0.0500601	0.0927113
C1GALT1	763.345	0.647152	0.0693772	117.538	2.99895e-26	2.71348e-25
C1GALT1C1	442.041	0.788466	0.0905837	82.5452	1.18995e-18	8.47209e-18
C1orf100	0.88511	0.523779	2.16637	1.84859	0.396811	0.519826
C1orf109	160.49	-0.19826	0.140481	2.53508	0.281523	0.398773
C1orf112	46.3509	-1.01393	0.262232	18.5597	9.32844e-05	0.000285108
C1orf115	6.1031	-3.33264	0.993596	17.4986	0.000158569	0.000470329
C1orf122	192.664	0.363441	0.123585	15.4246	0.000447302	0.00125016
C1orf123	72.2344	-0.35555	0.207741	5.26576	0.0718711	0.127134
C1orf131	71.8595	-0.444284	0.214394	9.30715	0.00952749	0.0210767
C1orf146	0.860012	-1.61243	1.81962	0.986976	0.610493	0.712818
C1orf159	32.4101	0.766607	0.316532	6.81061	0.0331967	0.0647386
C1orf162	0.858863	0.323303	1.85016	0.0948912	0.953662	0.964638
C1orf174	114.792	-0.180965	0.16606	1.35554	0.507747	0.6249
C1orf198	492.278	-1.91688	0.093631	615.35	2.38984e-134	8.43881e-133
C1orf21	56.4717	-1.06975	0.238445	47.6651	4.46322e-11	2.27929e-10
C1orf216	154.695	0.292428	0.144928	5.24226	0.0727207	0.128367
C1orf220	4.24332	-1.39535	0.896289	2.59347	0.273423	0.389489
C1orf226	5.35451	-2.70781	0.878336	19.8301	4.94254e-05	0.000156465
C1orf229	2.38564	1.89243	1.23277	2.487	0.288373	0.405846
C1orf35	53.026	0.138493	0.261704	1.23065	0.540464	0.653906
C1orf43	764.461	-0.0088138	0.0729285	51.9063	5.35409e-12	2.86206e-11
C1orf50	28.2633	0.155489	0.333332	0.33955	0.843855	0.891387
C1orf52	194.731	0.489228	0.126195	18.8562	8.04315e-05	0.000248121
C1orf53	43.743	-0.336482	0.251179	16.3456	0.000282226	0.000810112
C1orf54	25.0605	0.564989	0.3697	4.5064	0.105062	0.176024
C1orf56	13.1805	0.395213	0.48369	0.858818	0.650894	0.744723
C1orf74	14.4675	-0.297404	0.456458	0.514178	0.773299	0.841818
C1QBP	371.507	-0.204483	0.0963767	29.7743	3.42453e-07	1.34396e-06
C1QL3	4.05144	-0.836665	0.878508	1.61233	0.446568	0.567699
C1QTNF1	178.949	0.517983	0.146776	53.9927	1.88644e-12	1.03827e-11
C1QTNF2	3.09847	-1.27438	1.03618	5.75767	0.0562003	0.102635
C1QTNF3	3.6415	-0.351762	0.91935	3.43632	0.179396	0.276277
C1QTNF6	18.0937	0.0558426	0.398201	3.33308	0.188899	0.288623
C1R	89.5373	-1.35811	0.183203	179.434	1.08761e-39	1.33293e-38
C1RL	89.6243	-0.178058	0.180283	16.4095	0.000273352	0.000786463
C1RL.AS1	34.3925	0.411288	0.296893	2.17091	0.337748	0.459401
C1S	176.656	-0.837721	0.133962	154.603	2.68191e-34	2.93373e-33
C20orf144	1.06064	1.40839	1.93333	2.20687	0.33173	0.453179
C20orf194	389.986	0.164771	0.0886285	4.77791	0.0917256	0.156951
C20orf27	72.0767	-0.241038	0.222421	1.27366	0.528966	0.644242
C20orf96	12.287	0.10584	0.477308	0.553163	0.758372	0.830984
C21orf58	11.1942	-1.8408	0.553701	21.8934	1.7616e-05	5.87701e-05
C21orf59.TCP10L	3.14848	-0.317769	0.9888	0.230394	0.891191	0.9233
C21orf91	110.644	-0.650759	0.172522	14.4703	0.000720789	0.00195498
C22orf23	46.8135	-0.0269385	0.26774	0.624163	0.731922	0.809941
C22orf24	0.969574	-3.11404	1.80107	3.66839	0.159742	0.249919
C22orf39	42.5889	-0.524321	0.266281	4.94432	0.0844025	0.146034
C22orf46	29.207	-0.834729	0.324903	7.39977	0.0247263	0.0499161
C2CD2	1165.85	2.26121	0.0662688	1460.26	8.10463309175397e-318	6.88477004198287e-316
C2CD2L	65.2408	1.05484	0.223848	23.7257	7.04757e-06	2.46015e-05
C2CD3	138.714	-0.517012	0.149215	13.0171	0.00149067	0.0038446
C2CD4A	1.3662	1.54293	1.98196	8.88954	0.0117398	0.025504
C2CD4C	1.88489	3.57703	1.54751	6.31312	0.042572	0.0807754
C2CD5	156.705	-1.14347	0.144623	92.9665	6.49517e-21	4.99261e-20
C2CD6	3.61141	0.373453	0.927744	0.292597	0.8639	0.904481
C2orf15	1.63128	1.13097	1.32957	2.50906	0.285209	0.402766
C2orf16	19.501	0.421837	0.419977	7.02478	0.0298256	0.0589062
C2orf27A	28.1107	0.545471	0.33836	5.33626	0.0693817	0.123303
C2orf42	77.016	0.311286	0.227851	4.0292	0.133374	0.215374
C2orf49	207.575	-0.177227	0.128371	3.88403	0.143415	0.229012
C2orf66	7.63477	0.422648	0.629462	0.50138	0.778263	0.845557
C2orf68	62.3657	-0.595597	0.222509	7.53356	0.0231264	0.0469925
C2orf69	322.183	0.0697905	0.0999519	6.85933	0.0323977	0.0633467
C2orf74	67.0341	-0.666407	0.214858	12.9009	0.00157978	0.00405122
C2orf76	49.986	0.459679	0.244845	4.48281	0.106309	0.177872
C2orf81	8.62031	1.26996	0.621888	4.5071	0.105026	0.175982
C2orf88	8.84239	-0.563304	0.613368	1.48412	0.476131	0.595856
C2orf92	11.5389	1.06089	0.522019	4.52387	0.104149	0.174749
C3	122.656	0.446017	0.187483	91.8011	1.16319e-20	8.83147e-20
C3AR1	17.1249	3.92229	0.620389	55.3218	9.70575e-13	5.4304e-12
C3orf14	46.3843	0.14961	0.257189	1.39044	0.498965	0.617025
C3orf18	35.5327	-0.0515365	0.292979	8.18082	0.0167324	0.0352079
C3orf33	19.8888	-0.566959	0.399368	2.21252	0.330793	0.45219
C3orf35	3.42248	0.168142	0.901397	0.907708	0.635176	0.731561
C3orf38	228.833	0.21348	0.116963	3.36498	0.185911	0.284746
C3orf49	0.91792	-0.888966	1.9679	0.629642	0.729919	0.808447
C3orf52	58.0928	0.270084	0.233821	12.2915	0.00214257	0.00536762
C3orf58	516.98	0.601502	0.0855975	86.5166	1.63362e-19	1.1981e-18
C3orf62	36.1596	0.162042	0.289114	0.438312	0.803197	0.863676
C3orf67	90.4631	2.05594	0.21755	128.511	1.24204e-28	1.19741e-27
C3orf70	11.991	-1.78273	0.585664	10.6149	0.0049545	0.0115716
C3orf80	2.80525	-0.55397	1.0182	0.337896	0.844553	0.891721
C4orf3	816.7	0.983635	0.0690455	317.891	9.35195e-70	1.8463e-68
C4orf33	28.703	-2.18323	0.376565	48.4834	2.96459e-11	1.52603e-10
C4orf36	2.94735	-1.98664	1.16336	3.24687	0.19722	0.299232
C4orf46	185.81	-0.604632	0.132972	25.9244	2.34742e-06	8.53849e-06
C4orf47	1.68931	0.980833	1.35607	0.713082	0.700094	0.784472
C4orf48	113.513	0.296994	0.161031	18.1195	0.000116253	0.000350907
C5	19.5599	-0.953125	0.401721	11.4447	0.00327201	0.00790281
C5AR1	4.62429	1.40987	0.808649	4.29508	0.116771	0.19273
C5orf15	757.881	0.155325	0.0734201	38.7157	3.91733e-09	1.77276e-08
C5orf17	5.06701	-1.94891	0.85777	6.61721	0.0365671	0.07058
C5orf22	167.193	-0.463402	0.137904	15.4348	0.000445018	0.00124495
C5orf24	1985.13	0.315353	0.0562401	54.5497	1.42784e-12	7.90549e-12
C5orf30	842.612	-2.28339	0.0780445	1261.64	1.09097e-274	7.83498e-273
C5orf34	48.4134	0.61833	0.246978	6.33865	0.042032	0.0799141
C5orf38	23.1499	0.650184	0.368023	5.4225	0.0664535	0.118766
C5orf51	900.536	0.629137	0.0699496	111.24	6.99273e-25	6.0544e-24
C5orf56	4.24608	-1.55225	0.939822	3.36184	0.186203	0.285135
C5orf63	7.33873	-1.62485	0.675956	11.4512	0.00326147	0.00788119
C5orf66	25.016	-0.416487	0.340451	1.84116	0.398288	0.521303
C6	1.64402	1.22892	1.35536	1.16587	0.558257	0.669239
C6orf106	716.647	0.830038	0.0746526	181.489	3.89175e-40	4.8092e-39
C6orf120	607.125	-0.472187	0.0832823	39.2809	2.95294e-09	1.34658e-08
C6orf132	10.3838	-2.90656	0.680692	29.4696	3.98794e-07	1.55889e-06
C6orf141	5.54627	2.24041	0.791204	10.7632	0.00460052	0.0107958
C6orf163	2.45572	-1.23836	1.11208	2.58502	0.274581	0.390726
C6orf201	7.39385	0.0105555	0.660953	0.584587	0.746549	0.82166
C6orf203	61.0476	-0.0237348	0.224798	1.41775	0.492197	0.611176
C6orf226	16.1091	0.281196	0.416396	0.787082	0.674663	0.763691
C6orf62	1020.82	-0.0968098	0.0617029	3.31659	0.190463	0.290581
C6orf89	640.81	-0.156007	0.0741333	16.7464	0.000230977	0.000669861
C7orf25	71.936	0.197561	0.213615	0.940629	0.624806	0.723844
C7orf26	64.2869	-0.160079	0.228788	0.730852	0.693901	0.779678
C7orf31	7.28582	-1.22626	0.648249	7.91586	0.0191026	0.0397229
C7orf43	102.917	0.691286	0.191159	13.5145	0.00116243	0.00305419
C7orf50	110.913	-0.442556	0.164558	27.9883	8.36388e-07	3.17999e-06
C7orf57	4.60386	1.51103	0.937808	6.17884	0.0455283	0.0856207
C7orf61	2.69175	0.952772	1.06072	1.03828	0.595031	0.699433
C8G	1.36987	0.656573	1.46207	0.724214	0.696208	0.781473
C8orf33	187.868	0.152775	0.131778	2.2589	0.323211	0.444195
C8orf34	7.07556	-2.88736	0.817891	22.6881	1.18399e-05	4.0259e-05
C8orf37	20.0929	-0.955275	0.390548	11.378	0.00338291	0.00814286
C8orf44	9.97243	-1.29974	0.568625	6.44475	0.0398603	0.0763514
C8orf48	12.8761	-0.543761	0.487992	1.51148	0.469662	0.589148
C8orf58	41.7657	-0.642805	0.267492	8.00846	0.0182384	0.0380963
C8orf59	159.768	-0.290279	0.140842	4.80377	0.0905473	0.1554
C8orf76	58.1302	0.176938	0.235427	1.29956	0.52216	0.638043
C8orf82	65.9999	0.498689	0.221643	5.852	0.0536112	0.0985081
C8orf88	18.8018	-0.947756	0.420248	5.5496	0.0623621	0.112427
C9orf116	4.06124	-1.16106	0.864369	3.69283	0.157802	0.247326
C9orf16	133.924	1.73273	0.157022	134.417	6.48269e-30	6.46356e-29
C9orf163	1.22473	0.758259	1.56899	0.243411	0.885409	0.918976
C9orf3	51.5534	-1.36966	0.252364	47.7782	4.2178e-11	2.15841e-10
C9orf40	73.1821	-0.835809	0.208244	19.9176	4.73105e-05	0.000150121
C9orf41.AS1	1.51509	-0.653467	1.56922	2.049	0.358977	0.481354
C9orf43	1.39132	-0.239831	1.54521	0.120831	0.941373	0.956363
C9orf47	7.54167	-2.14314	0.725723	13.449	0.00120112	0.00314918
C9orf64	51.5495	-0.0994555	0.249548	0.549783	0.759654	0.83183
C9orf72	131.963	3.38437	0.211676	336.578	8.18303e-74	1.68957e-72
C9orf78	320.1	0.560213	0.101278	38.2872	4.8534e-09	2.18175e-08
C9orf84	2.98983	-0.829722	1.0666	1.00304	0.60561	0.709009
C9orf85	106.861	0.37362	0.183155	7.05485	0.0293804	0.0581197
CA11	5.80769	0.221091	0.702927	2.62653	0.268941	0.38443
CA12	156.976	0.54705	0.155065	85.6535	2.51526e-19	1.83473e-18
CA13	2.72961	2.19622	1.10245	5.31157	0.0702436	0.124626
CA14	1.96699	-0.718609	1.41183	1.32568	0.515386	0.632013
CA5B	23.8511	-0.0793836	0.353515	0.539599	0.763533	0.834547
CA5BP1	13.2394	0.59595	0.493459	3.06871	0.215595	0.321532
CA7	1.06624	0.751344	1.68437	0.212589	0.89916	0.928451
CAAP1	216.146	0.209573	0.126455	3.06848	0.215619	0.321536
CAB39	1270.67	0.467255	0.0586855	72.9443	1.44662e-16	9.57925e-16
CAB39L	281.375	0.357406	0.11858	217.018	7.5013e-48	1.07432e-46
CABCOCO1	0.942744	-3.54812	1.88035	8.06631	0.0177183	0.0371196
CABIN1	211.645	-0.224815	0.126497	3.45926	0.17735	0.273608
CABLES1	33.7355	-1.90517	0.350346	33.3235	5.80611e-08	2.42182e-07
CABLES2	43.7626	-0.315455	0.271076	2.34679	0.309315	0.429212
CABP7	1.0994	0.776471	1.54326	1.22566	0.541815	0.655058
CABYR	16.7203	-1.45474	0.441222	16.3786	0.000277609	0.000797939
CACFD1	23.285	0.590806	0.358102	3.73763	0.154306	0.242896
CACHD1	89.291	0.829465	0.195491	51.9067	5.35312e-12	2.86206e-11
CACNA1A	354.856	1.51873	0.104641	270.511	1.81631e-59	3.09647e-58
CACNA1C	69.8403	-1.22849	0.204698	117.982	2.40126e-26	2.18197e-25
CACNA1G	1.46663	0.760118	1.34702	1.84975	0.396581	0.519617
CACNA2D1	1718.38	2.07579	0.0587596	1249.6	4.48652e-272	3.14606e-270
CACNA2D2	2.30348	-0.177743	1.1581	0.509051	0.775284	0.843547
CACNA2D3	1.67659	-0.494057	1.43513	0.476801	0.787887	0.852331
CACNB1	24.8627	0.39415	0.368842	1.20102	0.548532	0.660174
CACNB2	1.94304	-2.92856	1.48151	4.59538	0.100491	0.169718
CACNB3	101.665	-0.459089	0.17485	8.90322	0.0116598	0.0253487
CACNB4	3.56009	0.121361	0.91301	2.31733	0.313905	0.433933
CACNG7	15.0902	1.59073	0.49128	15.9746	0.000339755	0.000966106
CACNG8	8.30035	1.41373	0.627629	5.45207	0.0654783	0.117291
CACTIN	40.3078	-0.0550478	0.28171	0.446437	0.79994	0.861442
CACTIN.AS1	1.82983	0.665932	1.27172	0.283153	0.867989	0.90729
CACUL1	554.256	0.672802	0.079666	88.607	5.74432e-20	4.26762e-19
CACYBP	355.176	0.0989583	0.0982951	15.6321	0.000403202	0.00113458
CAD	269.059	-0.488121	0.108008	21.3361	2.32766e-05	7.65197e-05
CADM1	9.19334	-0.674409	0.536574	23.5512	7.68992e-06	2.66974e-05
CADM4	5.33017	0.286298	0.73126	2.95858	0.227799	0.336058
CADPS	2.37205	0.533006	1.96939	0.0830647	0.959318	0.96857
CADPS2	14.7333	0.616396	0.438539	2.14403	0.342317	0.464315
CAHM	2.87245	1.16476	1.1236	1.18526	0.552872	0.664565
CALCOCO1	281.121	0.482973	0.104352	21.8063	1.84005e-05	6.12225e-05
CALCOCO2	538.069	0.346137	0.0867848	16.7506	0.000230493	0.000668717
CALCRL	41.5043	1.38033	0.315316	58.3606	2.12399e-13	1.22765e-12
CALD1	10169	-2.4231	0.0348295	6111.4	0	0
CALHM1	0.853744	0.492781	1.90923	0.136892	0.933844	0.951284
CALHM2	138.029	-0.249066	0.146427	21.6988	1.94158e-05	6.43701e-05
CALHM4	0.948806	-0.331019	1.9387	1.23081	0.540422	0.653906
CALHM5	74.8541	-0.34209	0.202767	11.2458	0.00361412	0.00865595
CALHM6	2.84884	-0.21106	0.994719	0.82737	0.661209	0.753164
CALM1	2833.33	0.484079	0.042331	140.341	3.35289e-31	3.43752e-30
CALM2	5550.45	-0.252903	0.0391747	41.8831	8.03895e-10	3.81934e-09
CALM3	962.77	-0.519321	0.0600839	152.511	7.63045e-34	8.27987e-33
CALML4	18.4663	-0.82412	0.411541	4.58007	0.101263	0.170833
CALR	3948.12	-0.205635	0.0397051	117.282	3.40877e-26	3.07306e-25
CALU	8341.38	0.0517796	0.0355755	97.5643	6.51899e-22	5.16309e-21
CAMK1	63.0043	0.573512	0.22795	8.85909	0.0119199	0.0258575
CAMK1D	13.2322	0.250926	0.478891	11.3977	0.00334976	0.00807354
CAMK1G	1.24938	0.193519	1.63462	0.483848	0.785116	0.850113
CAMK2D	1153.31	-0.5617	0.0567438	184.913	7.02412e-41	8.82676e-40
CAMK2G	153.65	-0.343199	0.142198	13.739	0.00103898	0.00274977
CAMK2N1	1921.4	0.7603	0.0467735	375.43	2.99575e-82	6.94772e-81
CAMK2N2	4.41917	2.17689	0.885774	6.88861	0.031927	0.0625414
CAMK4	55.8397	-1.48842	0.253195	52.9202	3.22502e-12	1.74784e-11
CAMKK1	49.1243	1.35705	0.257547	31.4487	1.48256e-07	5.97282e-07
CAMKK2	196.976	-0.45286	0.124431	19.3842	6.17693e-05	0.000193156
CAMKMT	19.5869	-0.326981	0.394521	2.18165	0.33594	0.45771
CAMLG	257.726	0.196685	0.111287	5.39901	0.0672388	0.119964
CAMSAP1	230.034	0.466094	0.116583	20.5231	3.49507e-05	0.000112365
CAMSAP2	1197.98	0.748867	0.0639913	177.952	2.28091e-39	2.77707e-38
CAMTA1	280.782	0.57864	0.107831	36.9588	9.4299e-09	4.1524e-08
CAMTA1.DT	0.836417	1.74436	2.05172	1.20818	0.54657	0.658406
CAMTA2	218.237	-0.267183	0.12557	4.78206	0.0915354	0.15668
CAND1	1388.08	-0.0655788	0.0602963	1.72815	0.421442	0.544275
CAND2	6.8826	-2.14278	0.744915	14.9865	0.000556825	0.00153377
CANT1	584.54	0.733102	0.0785502	119.9	9.20605e-27	8.43236e-26
CANX	5997.2	0.270221	0.0381603	52.2348	4.5431e-12	2.43731e-11
CAP1	3436.87	0.13156	0.0398615	41.9939	7.60567e-10	3.62274e-09
CAP2	293.472	-2.14507	0.116231	492.795	9.79433e-108	2.88322e-106
CAPG	140.097	0.690888	0.154752	21.6939	1.9464e-05	6.45153e-05
CAPN1	744.772	0.0777896	0.0715047	2.11508	0.347309	0.469329
CAPN10	47.0878	0.260381	0.26905	1.1236	0.570183	0.678867
CAPN10.DT	9.70815	-0.813088	0.564127	4.52561	0.104058	0.174637
CAPN11	3.55581	5.42095	1.3996	17.709	0.000142737	0.000426347
CAPN12	1.54469	-0.103915	1.48828	0.858627	0.650956	0.744737
CAPN14	1.48492	-0.704476	1.42257	0.255167	0.88022	0.915496
CAPN15	140.329	0.311892	0.153545	8.28965	0.0158462	0.0335809
CAPN2	4057.82	0.527609	0.0368928	291.685	4.58642e-64	8.40712e-63
CAPN3	16.8353	-1.33543	0.460787	9.48066	0.00873578	0.019441
CAPN5	241.04	1.24515	0.128288	98.9042	3.33604e-22	2.66776e-21
CAPN7	358.176	0.306838	0.0984801	9.90478	0.00706651	0.0159603
CAPNS1	1263.97	-0.220164	0.058668	14.0892	0.000872093	0.00233595
CAPRIN1	2567.06	-0.0845655	0.0448165	25.0953	3.5533e-06	1.27193e-05
CAPRIN2	289.585	0.20013	0.103209	3.82745	0.14753	0.234239
CAPS	5.15302	-0.0629046	0.730916	4.01559	0.134284	0.216468
CAPS2	11.4278	-1.53263	0.548436	14.1512	0.000845472	0.00226996
CAPZA1	2649.26	0.18977	0.0434922	24.4722	4.85211e-06	1.7166e-05
CAPZA2	1704.72	0.275705	0.0521832	44.7506	1.91658e-10	9.45005e-10
CAPZB	1603.91	0.0148333	0.0580863	9.84974	0.00726366	0.016377
CARD10	14.593	-1.44022	0.474269	14.3185	0.000777641	0.0020958
CARD14	4.40049	-0.20902	0.846145	0.591371	0.744021	0.819852
CARD16	19.4166	-0.987872	0.418628	5.73438	0.0568585	0.103687
CARD19	207.316	1.20076	0.122711	97.4098	7.04252e-22	5.56884e-21
CARD6	123.344	0.76129	0.163778	30.2908	2.64503e-07	1.04577e-06
CARD8	147.381	0.182946	0.145443	2.2147	0.330434	0.451824
CARD8.AS1	14.3242	0.692422	0.50699	4.53231	0.10371	0.17419
CARD9	8.88386	-0.0199453	0.556104	1.32071	0.516668	0.633137
CARF	45.7009	-0.318509	0.261568	2.97167	0.226313	0.334331
CARHSP1	104.255	-0.127239	0.168336	2.17114	0.337708	0.459401
CARM1	366.191	-0.178087	0.0991081	7.33457	0.0255457	0.0513956
CARMIL1	104.159	-0.109207	0.172815	0.774713	0.678849	0.767318
CARMIL2	2.05191	-0.214368	1.24752	0.138005	0.933324	0.951176
CARMN	3.97947	-5.54829	1.37836	29.0366	4.95202e-07	1.9211e-06
CARNMT1	367.584	1.22292	0.10024	200.699	2.62305e-44	3.51616e-43
CARNS1	6.63328	5.21069	1.29692	27.5832	1.02418e-06	3.85943e-06
CARS	15.6341	-0.252713	0.426025	1.10989	0.574103	0.681842
CARS2	378.319	1.15725	0.0970844	174.293	1.42178e-38	1.70453e-37
CASC10	9.48304	-1.02204	0.553319	7.68096	0.0214833	0.0440225
CASC2	3.55929	-3.2817	1.21466	10.6362	0.00490215	0.0114566
CASC3	284.577	0.163983	0.106932	6.49071	0.0389548	0.0747904
CASC4	1468.23	0.00587779	0.0589392	14.1132	0.000861709	0.00230939
CASD1	195.066	-0.480677	0.137182	19.6047	5.53222e-05	0.00017358
CASK	196.524	0.349597	0.134102	23.9891	6.17793e-06	2.1676e-05
CASKIN2	37.8723	-0.625685	0.2807	6.72598	0.0346316	0.0672458
CASP1	54.1253	-1.31006	0.254835	30.5686	2.30208e-07	9.14069e-07
CASP10	13.9865	0.176394	0.468786	1.49	0.474733	0.594507
CASP2	164.02	-0.041591	0.139327	0.756588	0.685029	0.77219
CASP3	785.974	-0.447669	0.0792064	33.6539	4.92209e-08	2.06234e-07
CASP4	365.41	0.589874	0.0973596	45.5057	1.31388e-10	6.53686e-10
CASP6	57.9153	-0.262226	0.22622	9.48292	0.00872591	0.019422
CASP7	227.188	0.426104	0.116743	14.7083	0.000639926	0.00174553
CASP8	144.088	0.585929	0.159235	18.8055	8.24984e-05	0.000254
CASP8AP2	224.978	-0.403357	0.130158	9.99755	0.00674622	0.0153221
CASP9	56.0035	0.691123	0.230298	15.3618	0.000461564	0.0012856
CASS4	4.61301	-1.39328	0.820578	9.00821	0.0110635	0.024169
CAST	2190.15	0.441724	0.0460263	92.3264	8.945e-21	6.8228e-20
CASTOR1	21.7193	0.476266	0.36728	4.53144	0.103755	0.174246
CASTOR2	94.308	1.14124	0.188384	37.5762	6.92509e-09	3.07309e-08
CASTOR3	35.2661	0.243111	0.299974	2.10784	0.348569	0.470524
CAT	458.556	-0.0709454	0.0850323	15.213	0.000497209	0.00137773
CATSPER1	5.39552	-0.78957	0.733915	4.27878	0.117727	0.194135
CATSPER2P1	1.08728	-1.59941	1.75071	1.20817	0.546575	0.658406
CATSPER3	1.84979	0.411247	1.40089	0.134644	0.934894	0.952123
CATSPERE	26.3054	2.17808	0.37718	37.0814	8.86924e-09	3.91363e-08
CATSPERG	0.823078	0.240552	2.06162	0.0972347	0.952546	0.964024
CAV1	8436.05	-2.2752	0.0376638	4469.9	0	0
CAV2	1453.51	-0.906767	0.0587493	387.316	7.8587e-85	1.88128e-83
CAVIN1	3332.71	-1.03126	0.0401143	895.954	2.79361e-195	1.45718e-193
CAVIN2	9.90431	-6.69802	1.25096	62.9724	2.11694e-14	1.27877e-13
CAVIN3	319.458	0.621076	0.100118	63.0381	2.04859e-14	1.23899e-13
CAVIN4	14.7497	-0.183835	0.480808	1.81695	0.403139	0.526193
CBARP	17.9821	1.00318	0.418804	5.80573	0.0548658	0.10051
CBFA2T2	106.295	0.396933	0.170476	5.48391	0.0644442	0.115606
CBFB	872.081	0.863173	0.0700389	180.331	6.9459e-40	8.55491e-39
CBL	898.224	1.08026	0.0655809	348.794	1.82114e-76	3.8954e-75
CBLB	247.032	0.716732	0.114669	40.2572	1.81244e-09	8.39631e-09
CBLL1	232.973	-0.0528875	0.125125	4.16317	0.124732	0.203493
CBLN3	25.8849	0.116654	0.333793	0.993214	0.608592	0.711144
CBLN4	1.32607	2.27383	1.8649	7.89271	0.019325	0.0401405
CBR1	400.487	0.602831	0.0983988	37.7009	6.50651e-09	2.89338e-08
CBR3	35.9576	0.316072	0.278398	3.96201	0.13793	0.221457
CBR3.AS1	7.00461	0.0793038	0.635134	2.82118	0.243999	0.355893
CBR4	128.754	0.145516	0.155671	4.50603	0.105082	0.176037
CBWD1	20.2706	-0.0389911	0.375852	0.289077	0.865422	0.905692
CBWD2	41.2967	0.167904	0.275685	0.841086	0.65669	0.749567
CBWD5	12.5972	-0.612219	0.48611	2.03459	0.361572	0.484114
CBWD6	2.41953	0.202238	1.08981	1.51876	0.467956	0.587678
CBX1	383.792	-0.807348	0.0965243	74.3349	7.21734e-17	4.81999e-16
CBX2	4.44047	0.116651	0.773984	4.61342	0.0995885	0.168466
CBX3	1538.36	0.183158	0.0625741	22.7191	1.16579e-05	3.96945e-05
CBX4	97.8973	0.572038	0.187956	11.7341	0.00283124	0.00692484
CBX5	1017.54	-0.46373	0.0680503	56.4397	5.54964e-13	3.12978e-12
CBX6	616.854	0.0855138	0.0737938	8.68217	0.0130224	0.0280429
CBX7	36.0686	-0.141294	0.291645	1.01035	0.603401	0.707147
CBX8	19.3649	0.54453	0.388687	2.00866	0.36629	0.489198
CBY1	60.7913	-0.951129	0.226174	24.5358	4.70034e-06	1.66528e-05
CC2D1A	60.9034	-0.104751	0.232469	6.25856	0.0437493	0.0826821
CC2D1B	152.343	0.19572	0.154553	1.93361	0.380297	0.503152
CC2D2A	51.4078	-1.97073	0.284733	69.4011	8.50649e-16	5.46017e-15
CC2D2B	1.41136	1.7352	1.46415	2.31964	0.313543	0.433634
CCAR1	817.505	-0.0484023	0.0681099	1.05727	0.58941	0.694868
CCAR2	241.643	0.110839	0.113922	1.24675	0.536131	0.650145
CCBE1	67.2294	-3.15888	0.296235	163.612	2.96504e-36	3.39848e-35
CCDC102A	18.8296	-0.34313	0.41472	1.36448	0.505483	0.622836
CCDC102B	11.8141	-0.335246	0.507204	0.44558	0.800283	0.86154
CCDC103	4.79488	0.294404	0.798977	0.220718	0.895513	0.926056
CCDC106	16.9489	-0.360924	0.416386	5.10423	0.0779165	0.136159
CCDC107	8.22033	0.469643	0.594845	0.946541	0.622961	0.722326
CCDC112	67.5329	-0.648791	0.213181	17.0082	0.00020264	0.000591952
CCDC113	5.70401	-2.11769	0.805517	11.1978	0.00370193	0.0088449
CCDC115	77.4573	-0.246106	0.200329	6.38208	0.041129	0.0784782
CCDC117	253.961	0.154807	0.122234	8.83099	0.0120885	0.0261813
CCDC12	63.5008	0.477841	0.216004	5.2435	0.0726754	0.128343
CCDC120	4.46587	-1.56618	0.929494	3.05761	0.216795	0.32303
CCDC121	7.17886	1.39771	0.665907	4.64566	0.0979956	0.166083
CCDC122	75.8648	-0.394677	0.202779	11.6165	0.00300264	0.0073104
CCDC124	48.4469	-0.428773	0.26309	8.71138	0.0128336	0.0276659
CCDC125	1.19226	1.30998	1.7042	0.811895	0.666345	0.757041
CCDC126	60.805	0.36422	0.23176	3.24042	0.197857	0.300045
CCDC127	68.8815	0.117472	0.210565	1.13833	0.565998	0.675779
CCDC130	55.1095	0.128806	0.234567	0.594407	0.742893	0.819155
CCDC134	8.17674	0.389536	0.596835	1.10778	0.574709	0.682398
CCDC136	61.3093	0.23039	0.22625	1.04338	0.593517	0.698317
CCDC137	89.8797	-0.43109	0.193056	6.10646	0.0472062	0.0883504
CCDC138	11.5463	-0.651178	0.515849	1.64856	0.438551	0.560047
CCDC14	596.91	-2.15466	0.0884706	1018.5	6.86448e-222	3.95533e-220
CCDC142	57.9135	1.14672	0.241014	23.1206	9.53751e-06	3.27296e-05
CCDC144B	35.8277	-0.928105	0.303721	10.2231	0.00602668	0.0138175
CCDC144CP	0.968646	-0.190341	1.63278	0.230741	0.891036	0.923205
CCDC144NL.AS1	1.76898	0.519185	1.22206	0.688079	0.708901	0.791577
CCDC146	12.2356	-0.470115	0.50219	5.00975	0.0816857	0.141846
CCDC148	1.55765	-2.98619	1.685	9.2302	0.00990118	0.0218319
CCDC149	83.3851	0.886808	0.186466	24.606	4.538e-06	1.61122e-05
CCDC15	28.3625	-0.379692	0.348465	2.0945	0.350901	0.472906
CCDC150	7.51227	-2.89517	0.809065	17.5855	0.000151827	0.000451605
CCDC151	2.81176	1.6099	1.10639	2.26005	0.323026	0.443982
CCDC152	9.00009	-2.39939	0.706326	16.9551	0.000208091	0.000607161
CCDC157	9.07224	0.393852	0.570568	2.73436	0.254825	0.368182
CCDC158	2.00133	-0.511441	1.1967	2.91312	0.233037	0.342629
CCDC159	10.0851	0.0902102	0.545605	1.90185	0.386383	0.509534
CCDC162P	1.44752	0.311902	1.4123	0.357197	0.836442	0.886662
CCDC163	3.20431	0.645009	0.979865	0.431504	0.805935	0.865681
CCDC167	34.6934	0.315631	0.288963	2.04011	0.360576	0.482989
CCDC168	5.09151	1.12163	0.805267	2.61585	0.27038	0.386228
CCDC17	2.04737	-0.663478	1.33807	1.33232	0.513679	0.630582
CCDC170	2.62099	-1.96349	1.10971	9.13287	0.0103949	0.0228259
CCDC171	13.8925	0.303076	0.442515	3.15656	0.20633	0.310015
CCDC173	1.75494	-3.02546	1.51122	5.52852	0.0630229	0.113385
CCDC174	72.4778	-0.0792528	0.197257	2.11288	0.347692	0.469676
CCDC18	90.3183	-0.295554	0.180379	5.53535	0.062808	0.113094
CCDC18.AS1	50.6316	-0.141195	0.25045	0.338505	0.844296	0.891681
CCDC181	3.13992	-1.84153	1.17087	3.71316	0.156206	0.245238
CCDC183	2.77772	-0.741555	1.06635	1.92055	0.382788	0.505735
CCDC183.AS1	4.38033	0.130433	0.790763	0.855541	0.651961	0.745657
CCDC184	3.23332	2.34246	1.10362	5.10119	0.0780353	0.136335
CCDC186	334.119	-0.574658	0.102291	41.3186	1.06608e-09	5.02644e-09
CCDC188	12.6942	0.495879	0.486384	1.25732	0.533306	0.647617
CCDC190	1.95167	-4.60168	1.54623	19.179	6.84438e-05	0.000213041
CCDC191	17.326	-1.72845	0.464975	18.891	7.90461e-05	0.000244151
CCDC200	3.4083	-0.607453	0.946432	1.5137	0.469142	0.588645
CCDC22	31.8827	0.614087	0.310036	4.30798	0.11602	0.191771
CCDC24	12.4336	-0.543012	0.507819	1.1863	0.552583	0.664351
CCDC25	234.466	-0.416773	0.115388	14.0573	0.000886131	0.00237185
CCDC28A	49.712	-0.233628	0.262609	7.42992	0.0243564	0.0492427
CCDC28B	14.9495	-0.918491	0.443635	14.6964	0.000643737	0.00175496
CCDC3	1.3633	-0.0788634	1.385	3.54107	0.170242	0.264177
CCDC30	3.27405	-0.244642	0.952501	1.16088	0.559653	0.670465
CCDC32	65.6074	-0.00504081	0.218535	0.0614558	0.969739	0.975712
CCDC34	42.0742	-1.33526	0.290102	23.1486	9.40473e-06	3.23187e-05
CCDC39	58.6997	-0.437182	0.238137	3.91133	0.14147	0.226285
CCDC40	14.3771	0.476496	0.438597	7.20203	0.027296	0.0544747
CCDC43	186.69	-0.253426	0.127908	4.08988	0.129388	0.209873
CCDC47	887.292	-0.0350198	0.067594	0.849066	0.654075	0.747516
CCDC50	960.167	-0.692049	0.0596266	200.234	3.30852e-44	4.42705e-43
CCDC51	33.669	-0.283388	0.300355	1.0508	0.591319	0.696502
CCDC57	68.2482	-0.119091	0.213127	3.15549	0.20644	0.310076
CCDC58	48.2147	-0.0671694	0.25523	0.076102	0.962664	0.970695
CCDC59	132.875	-0.229873	0.153182	7.37797	0.0249974	0.0504221
CCDC6	558.077	-0.182584	0.0767897	10.2533	0.00593656	0.0136348
CCDC61	9.30441	-0.897671	0.590276	2.58609	0.274434	0.390573
CCDC62	7.47305	1.71034	0.748412	5.88475	0.0527404	0.0971548
CCDC65	8.63691	-0.49511	0.616493	0.759816	0.683924	0.771413
CCDC66	64.1907	-0.316372	0.226378	2.14213	0.342643	0.464537
CCDC68	127.253	0.628589	0.157483	61.9728	3.48956e-14	2.09176e-13
CCDC69	7.07958	0.702433	0.657042	1.16931	0.557299	0.668543
CCDC7	54.3664	0.117345	0.236647	0.949427	0.622063	0.721689
CCDC71	41.8445	-0.417248	0.27022	3.0541	0.217176	0.323468
CCDC71L	1364.54	0.0969881	0.0537935	8.20301	0.0165478	0.034878
CCDC73	4.72475	0.121097	0.806241	0.189157	0.909757	0.935753
CCDC74A	9.84892	1.04307	0.529754	6.1352	0.0465327	0.0872437
CCDC74B	2.13257	-0.632072	1.14496	2.91541	0.23277	0.342271
CCDC77	30.7817	0.363971	0.30868	1.60004	0.44932	0.570174
CCDC78	6.88064	1.42805	0.696762	4.38356	0.111718	0.185834
CCDC8	12.8463	-0.149519	0.473272	0.232292	0.890345	0.922746
CCDC80	316.089	-2.00487	0.110315	653.055	1.55193e-142	5.79674e-141
CCDC81	16.0085	-4.4884	0.748725	97.5868	6.44609e-22	5.10808e-21
CCDC82	397.65	0.258567	0.0984099	14.4977	0.000711005	0.00192985
CCDC84	59.5137	0.209184	0.228705	1.58612	0.452457	0.572884
CCDC85A	1.07872	-3.75047	1.82725	9.35318	0.0093107	0.0206217
CCDC85B	147.874	-0.805352	0.150546	35.6183	1.84328e-08	7.9496e-08
CCDC85C	65.0603	-1.41311	0.226554	52.3244	4.34413e-12	2.33477e-11
CCDC86	100.168	0.453445	0.18171	19.6643	5.36973e-05	0.000168873
CCDC87	1.99839	0.867597	1.26461	0.566289	0.753411	0.827316
CCDC88A	1592.2	0.276198	0.053162	134.986	4.87726e-30	4.88251e-29
CCDC89	16.012	-0.248842	0.440058	0.879339	0.644249	0.739397
CCDC9	32.7521	0.217312	0.318338	3.11288	0.210885	0.315839
CCDC90B	307.207	-0.277018	0.103609	9.6766	0.00792049	0.0177623
CCDC91	171.274	0.171546	0.134494	2.17918	0.336354	0.458023
CCDC92	14.1274	0.193632	0.474279	0.842708	0.656158	0.749144
CCDC93	328.341	0.345348	0.0986843	14.2668	0.000798009	0.00214835
CCDC96	7.10548	-1.28006	0.710353	3.64792	0.161386	0.252225
CCDC97	47.6855	0.103514	0.265815	0.313252	0.855024	0.898098
CCDC9B	245.321	-0.622789	0.115243	59.7321	1.06987e-13	6.27653e-13
CCIN	2.52245	2.63758	1.24685	5.22356	0.0734038	0.129384
CCL2	295.869	-5.27918	0.218602	2000.28	0	0
CCL20	31.7659	6.8418	1.20742	157.816	5.379e-35	5.96748e-34
CCL26	1.56607	-1.79254	1.60603	1.71034	0.425211	0.547621
CCL28	1.93698	-3.83019	1.54599	6.65055	0.0359626	0.0695486
CCL7	7.01852	1.25708	0.668777	3.87049	0.144389	0.230236
CCM2	203.422	0.428094	0.123745	12.5583	0.00187503	0.00475345
CCNA2	119.173	-3.64038	0.236913	404.36	1.56442e-88	3.92187e-87
CCNB1	165.7	-3.12855	0.188934	361.729	2.82884e-79	6.24867e-78
CCNB1IP1	89.8957	-1.39839	0.199286	53.8023	2.07485e-12	1.13818e-11
CCNB2	56.9012	-4.46901	0.427108	209.054	4.02272e-46	5.55778e-45
CCNB3	0.994365	-0.512399	1.78866	1.82661	0.401197	0.524094
CCNC	509.157	-0.74776	0.0851406	78.6725	8.25076e-18	5.68114e-17
CCND1	10099.6	-1.12446	0.0320198	1408.76	1.23407e-306	1.0249e-304
CCND2	12.5961	-3.1116	0.673558	28.7686	5.66216e-07	2.18633e-06
CCND3	260.502	-0.0903517	0.113614	2.50225	0.286182	0.40368
CCNDBP1	355.058	0.178609	0.0984168	23.4904	7.92731e-06	2.74766e-05
CCNE1	33.2713	-0.617234	0.315151	5.97346	0.050452	0.093379
CCNE2	35.9329	-3.59879	0.428989	110.945	8.10393e-25	6.99205e-24
CCNF	35.8868	-2.10531	0.337064	45.8564	1.1026e-10	5.50596e-10
CCNG1	1528.49	-0.921828	0.0539487	417.887	1.80708e-91	4.6883e-90
CCNG2	496.841	0.658581	0.0891054	62.8565	2.24326e-14	1.35397e-13
CCNH	229.386	0.126611	0.121813	1.12663	0.569318	0.678161
CCNI	1227.05	0.369379	0.0594677	45.9033	1.07702e-10	5.38726e-10
CCNJ	81.823	0.740273	0.208984	14.5815	0.000681833	0.00185507
CCNK	275.509	-0.195606	0.110542	3.65102	0.161136	0.251887
CCNL1	544.615	-0.0673187	0.0805828	0.783879	0.675745	0.764596
CCNL2	1173.12	-0.0376203	0.0620954	2.07701	0.353984	0.476099
CCNO	3.15572	0.763424	1.01262	0.593706	0.743153	0.81926
CCNQ	74.4898	-0.665829	0.216427	10.4156	0.00547372	0.0126689
CCNT1	566.445	0.554649	0.0804604	70.0445	6.16629e-16	3.99425e-15
CCNT2	412.459	0.223575	0.0870001	8.92294	0.0115454	0.0251257
CCNT2.AS1	6.03732	-0.401906	0.723763	2.47063	0.290744	0.408178
CCNY	521.473	-0.224163	0.0818678	7.68033	0.0214901	0.0440226
CCNYL1	321.034	-0.206507	0.0986535	5.87073	0.0531115	0.0977656
CCNYL2	1.72351	-0.756918	1.26582	0.944722	0.623528	0.722758
CCP110	178.879	-0.887945	0.140318	42.7365	5.24661e-10	2.516e-09
CCPG1	168.953	0.65557	0.141754	44.5863	2.08072e-10	1.02356e-09
CCR10	3.64942	-0.679447	0.912711	0.575964	0.749775	0.824298
CCR7	1.60725	-0.753853	1.3457	0.736277	0.692021	0.778184
CCS	43.7948	0.0432693	0.276931	0.158641	0.923744	0.945431
CCSAP	100.147	-0.466605	0.184366	11.0348	0.00401632	0.00951955
CCSER2	444.799	-0.358098	0.091219	15.5925	0.000411282	0.00115601
CCT2	1245.82	0.203591	0.0577343	40.8406	1.35389e-09	6.34121e-09
CCT3	1278.42	0.0550347	0.0551863	7.30666	0.0259047	0.0520124
CCT4	1329.98	-0.0235828	0.0578742	28.7901	5.60167e-07	2.16466e-06
CCT5	1119.15	-0.21122	0.0607466	16.3096	0.00028736	0.00082453
CCT6A	1340.86	0.0536806	0.0550277	9.18813	0.0101116	0.0222506
CCT6B	6.02374	-0.778318	0.7456	1.38776	0.499633	0.617555
CCT6P1	13.0673	-0.698469	0.523894	2.72372	0.256183	0.369965
CCT6P3	9.84607	-0.752176	0.556095	1.89077	0.388531	0.511549
CCT7	840.183	0.0989879	0.0653551	19.3849	6.17487e-05	0.000193132
CCT8	1200.4	-0.0705136	0.0583149	13.4471	0.00120226	0.00315163
CCZ1	68.2464	0.0494971	0.211415	2.20056	0.332777	0.454158
CCZ1B	68.27	0.0278275	0.207247	0.339811	0.843744	0.891387
CCZ1P.OR7E38P	18.8471	-0.143834	0.401464	0.34665	0.840864	0.88976
CD109	2908.18	-0.144745	0.0470862	293.095	2.26578e-64	4.17904e-63
CD14	0.988223	-0.817181	1.63482	0.42053	0.810369	0.868611
CD151	1474.13	0.410433	0.0567852	55.7771	7.72941e-13	4.34097e-12
CD160	4.29982	-0.261784	0.815266	0.157402	0.924316	0.945756
CD163L1	41.1953	0.905651	0.284344	14.6596	0.000655707	0.00178595
CD164	4599.11	0.455437	0.0511717	89.694	3.33573e-20	2.50196e-19
CD177	2.69292	-0.672895	1.06979	0.454213	0.796836	0.859163
CD226	1.4037	0.445408	1.41853	0.241787	0.886129	0.91953
CD248	738.427	0.43824	0.0701289	182.58	2.25552e-40	2.80122e-39
CD27	1.10259	-0.315072	1.63686	0.202073	0.9039	0.931728
CD27.AS1	31.6404	-1.39157	0.325812	28.9663	5.12926e-07	1.98779e-06
CD274	478.034	0.277208	0.0981718	264.323	4.00835e-58	6.71038e-57
CD276	777.831	1.00627	0.0876681	140.936	2.48969e-31	2.56314e-30
CD2AP	440.318	0.229078	0.0910798	26.6586	1.62618e-06	6.00764e-06
CD2BP2	163.643	0.0633173	0.140938	0.203009	0.903477	0.931421
CD302	2.74982	-1.24793	1.11041	1.32626	0.515236	0.632013
CD320	65.9117	0.0630564	0.211111	0.189977	0.909384	0.935609
CD34	0.951555	-3.4175	1.8225	6.06111	0.0482887	0.0899913
CD36	3.35397	-1.99026	1.07621	4.6768	0.0964818	0.164032
CD37	2.32173	2.09343	1.23948	3.54014	0.170321	0.264273
CD3EAP	18.3081	-0.155793	0.444935	0.961682	0.618263	0.718504
CD40	1.30593	-1.1013	1.50799	1.43405	0.488202	0.607332
CD44	11090.8	0.143991	0.03521	25.1657	3.43036e-06	1.2294e-05
CD46	1666.61	0.601853	0.0535437	180.068	7.92066e-40	9.73933e-39
CD47	673.747	-0.342991	0.0700906	36.3855	1.25601e-08	5.47722e-08
CD55	424.585	1.69444	0.100203	420.947	3.91221e-92	1.02392e-90
CD58	98.5993	0.2627	0.172609	3.20548	0.201345	0.304203
CD59	7171.9	0.734718	0.0347096	639.799	1.17346e-139	4.30731e-138
CD63	4298.55	0.912742	0.0361966	653.264	1.39825e-142	5.23587e-141
CD68	373.773	2.15264	0.105291	447.213	7.74322e-98	2.09673e-96
CD7	1.81579	4.2486	1.59354	8.39266	0.0150507	0.0320458
CD72	2.38053	1.47269	1.15472	1.87991	0.390645	0.51374
CD81	2139.11	0.0573474	0.0502297	3.86008	0.145142	0.231164
CD82	97.7749	0.109243	0.184212	14.9078	0.000579186	0.00159032
CD83	29.6467	-1.12106	0.33672	11.8186	0.00271403	0.00666008
CD9	776.444	0.985894	0.0692964	227.56	3.85533e-50	5.77174e-49
CD99L2	226.64	-0.417267	0.117137	39.5239	2.61516e-09	1.19917e-08
CDA	3.12645	1.47239	1.15994	1.89864	0.387003	0.51017
CDADC1	24.5289	-0.252637	0.360001	0.721734	0.697072	0.782147
CDAN1	70.036	0.168158	0.214027	1.00287	0.605661	0.709014
CDC123	511.564	0.548975	0.0854004	70.999	3.82624e-16	2.50246e-15
CDC14A	42.2822	1.14086	0.295557	16.7862	0.000226428	0.000657822
CDC14B	106.971	-1.31497	0.17606	85.0695	3.36822e-19	2.44492e-18
CDC14C	3.1055	-1.92232	1.05603	5.17046	0.0753788	0.132347
CDC16	599.519	0.140481	0.0797813	3.3706	0.185389	0.284025
CDC20	53.9111	-5.06104	0.521277	209.244	3.6585e-46	5.05928e-45
CDC23	117.893	-1.03117	0.166278	41.9972	7.59308e-10	3.61791e-09
CDC25A	29.9061	-1.91893	0.356795	32.9094	7.14178e-08	2.95738e-07
CDC25B	171.937	-0.107725	0.134514	16.2776	0.000291983	0.00083715
CDC25C	9.26781	-2.63833	0.753133	14.4604	0.000724367	0.00196397
CDC26	16.9019	0.605514	0.418835	2.50926	0.285181	0.402765
CDC27	1349.88	0.317027	0.0571661	38.7847	3.78459e-09	1.71373e-08
CDC34	139.728	0.476161	0.151846	10.6081	0.00497133	0.0116018
CDC37	667.258	0.0530886	0.0739792	0.774045	0.679076	0.767458
CDC37L1	208.749	0.28401	0.123984	5.31856	0.0699985	0.12428
CDC37L1.DT	0.876515	-2.97811	1.87568	3.19706	0.202194	0.305221
CDC40	209.279	-0.184615	0.131584	2.0105	0.365953	0.488869
CDC42	1289.73	0.040822	0.0549653	0.988055	0.610164	0.712489
CDC42BPA	1253.56	-0.521173	0.0559938	93.2769	5.56135e-21	4.28368e-20
CDC42BPB	883.065	0.169323	0.0646789	13.3972	0.00123262	0.0032255
CDC42EP1	165.397	-0.344137	0.147119	7.43614	0.0242807	0.0491032
CDC42EP2	159.325	0.073957	0.153824	7.60985	0.0222608	0.0454511
CDC42EP3	875.504	-3.04312	0.0840494	1721.9	0	0
CDC42EP4	138.151	-0.595727	0.147725	28.8122	5.53991e-07	2.14191e-06
CDC42P3	3.6321	-1.02848	1.01773	1.09526	0.578318	0.685807
CDC42SE1	619.471	0.518273	0.075559	47.6701	4.45208e-11	2.27438e-10
CDC42SE2	292.415	-0.715856	0.110773	46.6867	7.27981e-11	3.67601e-10
CDC45	23.265	-2.46241	0.431334	43.7172	3.21315e-10	1.56407e-09
CDC5L	374.854	-0.0347645	0.102057	2.24909	0.3248	0.446048
CDC6	58.2134	-2.53272	0.277488	104.783	1.76458e-23	1.47124e-22
CDC7	31.0361	-1.5999	0.336293	35.9689	1.54686e-08	6.70623e-08
CDC73	861.285	-0.178196	0.0712847	16.8614	0.000218069	0.000634903
CDCA2	51.8516	-3.34906	0.352838	128.8	1.07493e-28	1.03765e-27
CDCA3	23.2051	-3.90205	0.561052	89.5419	3.59929e-20	2.6915e-19
CDCA4	105.581	-0.092904	0.166734	1.4196	0.491743	0.610664
CDCA5	46.6939	-3.34336	0.361653	123.22	1.75052e-27	1.63771e-26
CDCA7	46.7622	-6.26386	0.750714	287.789	3.21644e-63	5.83118e-62
CDCA7L	71.2335	-2.02023	0.237146	80.9443	2.6495e-18	1.8579e-17
[truncated: 12,867 more rows]

## Sheet: Supplementary Table 1C
GeneID	baseMean	log2FoldChange	lfcSE	stat	pvalue	padj
A1BG	43.2154	0.299525	0.258081	7.57273	0.0226779	0.0461758
A1BG.AS1	10.127	0.117871	0.537029	0.268712	0.874279	0.911561
A2M	11.6016	-2.73437	0.609931	40.6101	1.51928e-09	7.08237e-09
A4GALT	24.4649	0.846263	0.347109	10.3264	0.00572332	0.0131952
A4GNT	1.58325	-1.53702	1.49977	1.18029	0.554247	0.665867
AAAS	87.218	-0.349494	0.187085	4.89413	0.0865472	0.149259
AACS	145.006	-0.459147	0.153913	9.43323	0.0089454	0.0198778
AADAT	56.5091	0.808512	0.239938	13.4795	0.00118294	0.00310543
AAGAB	287.769	-0.255761	0.103885	9.90038	0.00708207	0.015993
AAK1	855.475	-0.223218	0.0646355	21.4683	2.17877e-05	7.18013e-05
AAMDC	33.9465	-1.4449	0.317238	24.6746	4.38511e-06	1.55917e-05
AAMP	323.935	0.569345	0.101597	46.1939	9.31354e-11	4.67122e-10
AAR2	140.812	-0.441575	0.15231	10.1528	0.0062422	0.0142545
AARD	0.887259	-1.54429	1.88427	0.825059	0.661974	0.753688
AARS	283.167	-0.791725	0.114397	52.1027	4.85345e-12	2.60286e-11
AARS2	48.9581	-0.466218	0.263997	6.12242	0.0468309	0.0877474
AARSD1	0.86018	-1.63764	1.92231	0.975559	0.613988	0.715111
AASDH	72.3087	-0.920746	0.208222	25.9915	2.26995e-06	8.2668e-06
AASDHPPT	575.797	-0.328809	0.0785495	18.9083	7.83651e-05	0.000242199
AASS	206.749	0.00525912	0.12116	2.228	0.328243	0.449573
AATK	1.22759	-1.20033	1.57738	2.22541	0.32867	0.449947
ABALON	1.9172	3.40255	1.59206	5.35641	0.0686862	0.122213
ABAT	27.3424	-1.52871	0.357952	30.4158	2.48482e-07	9.83999e-07
ABCA1	847.086	3.37906	0.0868887	1729.39	0	0
ABCA10	2.15616	-0.869088	1.16714	5.88433	0.0527514	0.097163
ABCA11P	28.1294	-0.237273	0.320774	1.07983	0.582797	0.689249
ABCA12	0.921938	-1.68827	3.1042	1.91318	0.384201	0.507242
ABCA13	8.24437	5.01817	1.32215	49.7937	1.53973e-11	8.05403e-11
ABCA2	198.959	0.744035	0.139175	29.1459	4.68866e-07	1.82274e-06
ABCA3	2.49933	-1.49814	1.15494	2.39305	0.302242	0.421613
ABCA4	15.8376	4.11783	0.747213	53.848	2.02797e-12	1.11328e-11
ABCA5	47.7116	-2.08674	0.281915	96.0222	1.40941e-21	1.10508e-20
ABCA6	31.8104	2.1783	0.359151	38.2132	5.03623e-09	2.26189e-08
ABCA7	10.0971	-0.305724	0.539121	3.49774	0.17397	0.269316
ABCA8	21.7121	-2.29134	0.433886	41.5062	9.70612e-10	4.58941e-09
ABCA9	4.14248	0.747857	0.816122	1.76777	0.413174	0.535972
ABCB1	10.4643	-3.88524	0.828461	43.586	3.43105e-10	1.66686e-09
ABCB10	148.155	-1.13094	0.159989	68.1236	1.6112e-15	1.02359e-14
ABCB6	41.3117	-1.12431	0.283325	18.8107	8.22815e-05	0.000253407
ABCB7	97.6041	-0.452804	0.177925	7.60406	0.0223254	0.0455579
ABCB8	89.7962	-0.101283	0.190646	0.928018	0.628758	0.727063
ABCB9	23.6562	0.24215	0.39445	1.76168	0.414435	0.537139
ABCC1	24.1591	0.209486	0.355979	0.502109	0.77798	0.84549
ABCC10	129.807	0.103102	0.160902	0.973544	0.614607	0.715654
ABCC2	5.93961	0.598014	0.695081	0.816216	0.664907	0.755928
ABCC3	121.452	-1.44761	0.170347	113.127	2.72164e-25	2.38983e-24
ABCC4	300.257	-0.239117	0.104175	5.53347	0.062867	0.113187
ABCC5	290.453	0.883995	0.106532	70.5006	4.90887e-16	3.19646e-15
ABCC9	0.824934	-3.14269	1.93541	3.91984	0.14087	0.225641
ABCD1	57.7323	0.926028	0.233204	16.1849	0.000305837	0.000874845
ABCD3	385.337	-0.0122813	0.0933251	36.8005	1.02066e-08	4.4838e-08
ABCD4	79.4166	0.196015	0.20044	0.996265	0.607664	0.710296
ABCE1	798.633	-0.567313	0.0721923	92.781	7.12628e-21	5.46643e-20
ABCF2	324.744	-0.334265	0.0996169	11.4047	0.00333806	0.00804664
ABCF3	170.147	0.506532	0.141267	17.5038	0.000158163	0.000469313
ABCG2	8.27012	-0.204087	0.586641	3.23994	0.197904	0.300086
ABHD10	424.378	0.473102	0.0906677	29.4938	3.9401e-07	1.54141e-06
ABHD11	30.6708	0.897438	0.327976	8.26329	0.0160564	0.0339827
ABHD11.AS1	1.79377	0.220843	1.30865	0.330568	0.847653	0.893626
ABHD12	166.041	-0.545354	0.137559	46.898	6.54979e-11	3.31639e-10
ABHD13	328.357	0.350209	0.100769	17.2775	0.000177113	0.000521791
ABHD14A	8.82417	-0.770811	0.594183	1.89749	0.387228	0.51033
ABHD14B	62.3653	-0.593837	0.233132	6.55265	0.0377668	0.0727079
ABHD15	63.044	0.727028	0.21755	12.7749	0.00168253	0.00429843
ABHD16B	25.0539	1.28723	0.37549	13.4343	0.00120997	0.00316903
ABHD17A	51.7802	0.261632	0.249969	1.67202	0.433436	0.555374
ABHD17B	293.336	1.0511	0.114082	170.424	9.83789e-38	1.15704e-36
ABHD17C	533.249	0.594968	0.0884499	412.182	3.13266e-90	8.0432e-89
ABHD18	69.3466	-0.210568	0.205194	2.69131	0.26037	0.374846
ABHD2	930.234	0.765626	0.0625593	229.102	1.78295e-50	2.68273e-49
ABHD3	47.9355	0.225136	0.250316	7.0831	0.0289684	0.0574269
ABHD4	124.949	0.997685	0.160128	39.3384	2.86933e-09	1.30885e-08
ABHD5	459.103	0.82233	0.0963821	184.158	1.02488e-40	1.28033e-39
ABHD6	52.3201	1.18151	0.251146	22.8585	1.08729e-05	3.71151e-05
ABHD8	30.6046	-0.0754023	0.320445	0.0911735	0.955437	0.966001
ABI1	809.47	0.455178	0.0713339	72.4316	1.86934e-16	1.2329e-15
ABI2	698.788	-0.137672	0.0718329	3.85242	0.145699	0.231919
ABI3	2.51764	-2.4228	1.30042	3.98198	0.13656	0.219661
ABI3BP	17.2075	-0.648586	0.424145	2.69006	0.260531	0.375006
ABL1	681.788	0.669435	0.0757578	153.184	5.45226e-34	5.94233e-33
ABL2	1833.83	0.982524	0.0492419	710.228	5.96898e-155	2.41127e-153
ABLIM1	99.6252	-1.83371	0.194037	147.442	9.62659e-33	1.01712e-31
ABLIM3	360.012	0.309225	0.101421	61.6879	4.02382e-14	2.40234e-13
ABRACL	330.716	1.10833	0.104625	114.179	1.60788e-25	1.42193e-24
ABRAXAS1	61.1668	0.123651	0.218895	2.50785	0.285382	0.402934
ABRAXAS2	211.872	-0.023052	0.125792	0.944124	0.623715	0.722862
ABT1	95.1076	0.261018	0.191966	4.52875	0.103895	0.174422
ABTB1	59.1005	1.03599	0.253618	20.9632	2.80482e-05	9.11596e-05
ABTB2	75.1425	1.01804	0.204448	27.7642	9.35579e-07	3.53541e-06
ACAA1	93.3372	-0.173168	0.186919	1.9699	0.373459	0.496497
ACAA2	57.9462	-0.510755	0.233314	20.8635	2.94812e-05	9.55874e-05
ACACA	2.77862	-0.432578	1.01944	1.87725	0.391165	0.514107
ACACB	7.86286	-0.159812	0.590642	6.10173	0.0473179	0.0884703
ACAD10	44.97	-0.335853	0.255996	2.4049	0.300457	0.419437
ACAD8	76.0996	0.509533	0.202115	7.35332	0.0253073	0.050985
ACAD9	119.303	0.0127988	0.157256	2.05789	0.357384	0.47976
ACADM	341.44	-0.0277991	0.0973734	0.12008	0.941727	0.956574
ACADS	8.32	-1.57174	0.714463	5.52994	0.0629781	0.113345
ACADSB	187.007	-0.246634	0.130788	7.79341	0.0203087	0.0419377
ACADVL	665.219	0.0513889	0.0734763	4.04332	0.132435	0.214091
ACAP1	5.97996	-0.00510788	0.748921	2.17844	0.336479	0.45811
ACAP2	1434.96	0.258453	0.0595116	24.4642	4.87155e-06	1.72307e-05
ACAP3	135.016	0.0676709	0.151703	13.2973	0.00129578	0.00337652
ACAT1	383.75	-0.261703	0.0939266	8.27606	0.0159543	0.0337954
ACAT2	103.442	-0.669227	0.177457	18.8878	7.91699e-05	0.000244432
ACBD3	877.16	0.207099	0.0670109	15.029	0.000545122	0.00150404
ACBD3.AS1	2.36405	0.664693	1.16491	0.653525	0.721255	0.801538
ACBD4	10.2901	-1.44529	0.568841	9.08925	0.0106241	0.0232982
ACBD5	290.383	-0.0219295	0.103413	0.458993	0.794934	0.857894
ACBD6	116.544	-0.0940953	0.163897	0.381197	0.826464	0.879409
ACBD7	4.23619	-3.55106	1.15465	18.2656	0.00010806	0.000327507
ACCS	8.66975	-1.07794	0.612582	3.15206	0.206794	0.310494
ACD	30.8444	-0.00587163	0.308539	0.761762	0.683259	0.770838
ACE	11.6793	-0.833851	0.523711	2.74379	0.253626	0.366949
ACER2	18.5744	0.473516	0.392133	2.95102	0.228662	0.337198
ACER3	226.499	0.180221	0.122569	2.58361	0.274775	0.390928
ACIN1	804.454	0.40882	0.0658042	41.9701	7.69663e-10	3.66255e-09
ACKR3	1.50332	0.555064	1.97978	13.3752	0.00124628	0.0032561
ACKR4	164.92	-4.1508	0.220973	760.761	6.35137e-166	2.77704e-164
ACLY	1398.78	0.268832	0.0519556	28.3729	6.9009e-07	2.64472e-06
ACO1	1294.09	0.644836	0.0562446	143.432	7.14623e-32	7.43948e-31
ACO2	127.131	-0.916621	0.162173	38.4716	4.42588e-09	1.99621e-08
ACOT1	4.21431	-0.411689	0.899201	0.301568	0.860033	0.901636
ACOT11	7.91394	0.882571	0.623971	2.10634	0.348831	0.470787
ACOT13	87.4189	0.176862	0.181463	2.79805	0.246837	0.359151
ACOT2	47.5469	-0.32304	0.251984	3.44131	0.178948	0.275731
ACOT7	249.258	0.707708	0.11333	39.3818	2.80777e-09	1.28234e-08
ACOT8	35.6227	0.0509661	0.287434	0.593194	0.743344	0.819287
ACOT9	338.32	0.306707	0.106011	8.3964	0.0150226	0.0319951
ACOX1	531.159	0.836593	0.0812641	107.956	3.61211e-24	3.06668e-23
ACOX2	21.0103	0.339341	0.411653	1.20125	0.548468	0.660151
ACOX3	78.0164	-0.636181	0.197167	11.748	0.00281157	0.00688354
ACP1	471.978	-0.0302967	0.0835357	0.133634	0.935367	0.952539
ACP2	71.7431	-0.680118	0.23774	17.8823	0.000130888	0.000392533
ACP5	5.72407	0.975843	0.712555	2.23876	0.326483	0.44778
ACP6	16.8049	-0.220573	0.432155	0.944425	0.623621	0.722809
ACP7	92.0937	6.27208	0.666383	404.533	1.4351e-88	3.60374e-87
ACPP	1639.77	5.1831	0.108486	5581.56	0	0
ACRV1	0.908969	2.69256	1.88011	2.96209	0.227399	0.335698
ACSBG1	2.31372	-0.706968	1.12047	0.5844	0.746619	0.82166
ACSF2	10.3328	-1.72008	0.568515	12.7578	0.00169695	0.00433452
ACSF3	37.0111	0.161305	0.27806	0.955839	0.620072	0.720155
ACSL1	225.32	0.4298	0.12547	12.7315	0.00171942	0.00438662
ACSL3	1296.05	0.594511	0.0585353	188.766	1.02318e-41	1.309e-40
ACSL4	3038.9	0.230789	0.0461727	218.981	2.81069e-48	4.05667e-47
ACSL5	6.53578	0.113569	0.663792	0.0319395	0.984157	0.986413
ACSM4	2.70606	2.78139	1.32704	6.23042	0.0443692	0.083694
ACSS1	7.57701	-1.15902	0.652592	7.87273	0.0195191	0.0404927
ACSS2	139.376	0.325416	0.162246	4.53259	0.103696	0.174186
ACSS3	1.5212	-1.63714	1.47622	1.72009	0.423143	0.545856
ACTA1	1.80881	-1.92209	1.42313	2.05943	0.357109	0.479435
ACTA2	185.84	-3.15853	0.165674	841.796	1.60774e-183	7.83628e-182
ACTA2.AS1	1.4513	-1.54028	1.47345	3.00964	0.222057	0.329319
ACTB	15266.9	-1.23727	0.0376842	1153.2	3.84506e-251	2.52924e-249
ACTC1	2.85712	-2.75148	1.26668	8.07504	0.0176412	0.0369685
ACTG1	16971.4	-0.965968	0.0271706	1387.2	5.93464e-302	4.87428e-300
ACTG1P20	110.553	-0.691436	0.170019	25.5555	2.82293e-06	1.02081e-05
ACTG1P4	7.94529	-0.917991	0.6545	1.98485	0.370676	0.493416
ACTG2	17.5366	-4.43044	0.71921	89.9797	2.89167e-20	2.17329e-19
ACTL10	2.89237	-0.620665	1.1601	0.285949	0.866776	0.906408
ACTL6A	298.51	-0.0195319	0.109213	15.8014	0.000370489	0.00104674
ACTN1	4117.57	-0.427067	0.0424168	142.594	1.08662e-31	1.12648e-30
ACTN4	1593.48	-0.633937	0.0578188	147.649	8.67863e-33	9.18921e-32
ACTR10	437.449	-0.160877	0.0967456	6.37952	0.0411817	0.0785586
ACTR1A	598.526	0.247035	0.0730068	11.8223	0.00270912	0.00664913
ACTR1B	214.916	-0.92376	0.12933	52.6711	3.65271e-12	1.97459e-11
ACTR2	4350.8	-0.220603	0.0410233	34.9444	2.58174e-08	1.10224e-07
ACTR3	3771.43	-0.242374	0.0410488	34.9522	2.57177e-08	1.0984e-07
ACTR3.AS1	1.29095	-0.215248	1.46508	0.343532	0.842176	0.890518
ACTR3B	14.8025	-2.26825	0.551699	20.2362	4.03419e-05	0.000128834
ACTR3C	1.64391	-0.765207	1.41022	0.330457	0.8477	0.893626
ACTR5	18.3944	-0.203673	0.407818	0.525645	0.768878	0.838602
ACTR6	231.829	-0.0559859	0.117937	0.70999	0.701177	0.785272
ACTR8	225.132	0.0614427	0.115959	0.839312	0.657273	0.750059
ACTRT3	13.2556	-0.249282	0.498794	0.26829	0.874463	0.911689
ACVR1	511.673	0.728925	0.0846249	75.5383	3.95433e-17	2.65876e-16
ACVR1B	314.518	0.458153	0.102942	62.3647	2.86871e-14	1.72447e-13
ACVR1C	12.4857	-0.12714	0.487893	0.082487	0.959595	0.968718
ACVR2A	68.7494	0.374509	0.227361	7.68902	0.0213969	0.0438679
ACVR2B	52.3177	1.20078	0.246279	26.2851	1.96007e-06	7.17696e-06
ACVRL1	394.268	2.1193	0.114422	778.546	8.72717e-170	3.90777e-168
ACY1	1.66122	0.800625	1.52637	0.366599	0.832519	0.884079
ACYP1	53.2252	0.49761	0.239017	5.52892	0.0630101	0.113375
ACYP2	68.3889	-0.314868	0.215546	3.91226	0.141405	0.226212
ADA	15.4648	-0.463026	0.442114	1.561	0.458177	0.578254
ADA2	7.27015	-3.35746	0.877893	25.2502	3.28851e-06	1.18141e-05
ADAL	37.8954	-0.723799	0.282661	9.08331	0.0106557	0.0233606
ADAM10	1838.06	-0.402292	0.0516759	82.217	1.40219e-18	9.94988e-18
ADAM12	107.717	-1.55887	0.189852	98.6697	3.75103e-22	2.99157e-21
ADAM15	142.704	-0.487448	0.145415	20.9718	2.79278e-05	9.07881e-05
ADAM17	368.99	0.415143	0.101003	17.0584	0.000197611	0.000578398
ADAM19	2055.1	2.56785	0.0525685	2467.25	0	0
ADAM1A	11.2434	-1.1766	0.565439	4.40872	0.110321	0.183778
ADAM21	2.24036	-1.27441	1.17678	3.5941	0.165787	0.258127
ADAM22	1.81276	0.5562	1.30965	1.54987	0.460734	0.580644
ADAM23	8.74131	1.84404	0.607337	10.1354	0.00629696	0.0143685
ADAM28	3.11602	1.69733	1.11376	2.80619	0.245834	0.358006
ADAM33	310.697	0.32917	0.105623	10.1523	0.00624384	0.014256
ADAM8	17.1896	1.58014	0.427655	15.0131	0.000549483	0.00151523
ADAM9	2106.1	-0.292285	0.0432996	99.1184	2.99714e-22	2.40191e-21
ADAMTS1	1666.37	-1.32048	0.0522814	2199.61	0	0
ADAMTS10	3.45195	0.17815	0.898763	0.113783	0.944697	0.958567
ADAMTS12	219.353	-1.42014	0.129583	159.72	2.076e-35	2.32569e-34
ADAMTS13	5.1572	-0.603749	0.744911	2.06256	0.35655	0.478938
ADAMTS14	17.6958	-2.23482	0.511641	23.7198	7.06838e-06	2.46663e-05
ADAMTS15	12.454	-2.97197	0.607914	54.0829	1.80319e-12	9.9319e-12
ADAMTS2	271.37	-2.03797	0.126654	505.878	1.41243e-110	4.23331e-109
ADAMTS3	12.4784	0.275071	0.504058	0.611157	0.736697	0.814195
ADAMTS4	847.965	4.46159	0.131141	2306.2	0	0
ADAMTS5	76.1094	1.26847	0.204556	74.2201	7.64382e-17	5.10022e-16
ADAMTS6	438.835	0.292407	0.0903697	68.8439	1.12391e-15	7.18627e-15
ADAMTS7	5.9138	-1.5	0.745014	8.19914	0.0165798	0.0349314
ADAMTS8	1.06009	3.71131	1.82573	4.60773	0.0998719	0.16885
ADAMTS9	9.29528	5.22095	1.09618	38.104	5.31879e-09	2.38519e-08
ADAMTSL1	388.419	-0.246338	0.0897549	248.728	9.76024e-55	1.55849e-53
ADAMTSL4	93.7734	0.676461	0.179593	14.9046	0.000580103	0.00159229
ADAMTSL4.AS1	5.30179	2.44996	0.925063	9.70619	0.00780418	0.0175199
ADAMTSL5	67.01	-0.372785	0.209801	15.3912	0.000454829	0.00126881
ADAP2	1.26085	0.651993	1.4985	0.634435	0.728172	0.807245
ADAR	1505.54	0.0853995	0.0572487	3.75183	0.153215	0.241588
ADARB1	70.9721	-0.64099	0.208135	14.7505	0.000626558	0.00171252
ADAT1	176.131	-0.144696	0.143393	1.38239	0.500977	0.618617
ADAT2	52.9758	-1.09428	0.265612	17.5773	0.000152455	0.00045328
ADAT3	11.9646	0.892557	0.509852	3.49924	0.17384	0.269199
ADCK1	17.4908	-0.822959	0.416696	6.00855	0.0495748	0.0919155
ADCK2	25.6668	-0.634985	0.34612	3.46073	0.17722	0.273436
ADCK5	19.2034	-0.478975	0.407026	1.49029	0.474666	0.594507
ADCY1	1.10728	-0.824222	1.62031	0.293265	0.863611	0.904371
ADCY10P1	16.0821	0.614141	0.43811	3.06535	0.215957	0.321943
ADCY3	170.617	0.0370286	0.132044	0.446521	0.799907	0.861442
ADCY4	15.853	0.356289	0.459234	8.36022	0.0152968	0.0325233
ADCY5	1.51736	0.981557	1.41958	1.82271	0.401979	0.52484
ADCY6	309.794	-0.291405	0.10484	28.4474	6.64868e-07	2.55201e-06
ADCY7	281.244	0.944628	0.106627	81.9117	1.63343e-18	1.15521e-17
ADCY8	2.20676	3.25603	1.64175	12.2124	0.00222895	0.00556153
ADCY9	220.73	-1.06664	0.122257	104.753	1.79101e-23	1.49245e-22
ADD1	1177.08	-0.186422	0.0554357	13.33	0.00127474	0.0033252
ADD3	802.331	-1.0921	0.0682021	389.283	2.93938e-85	7.09364e-84
ADGRA2	166.502	-2.3641	0.160193	387.007	9.17356e-85	2.19251e-83
ADGRA3	514.041	0.292883	0.0851755	45.0107	1.68289e-10	8.3254e-10
ADGRB1	7.69346	1.28374	0.710483	10.6934	0.00476384	0.0111526
ADGRB2	52.9735	0.437378	0.231839	5.07218	0.0791756	0.138116
ADGRE1	0.96087	-0.284928	1.82064	0.333123	0.846571	0.893183
ADGRE2	81.2823	3.67152	0.27944	230.764	7.76645e-51	1.17453e-49
ADGRE5	486.562	0.494831	0.0834024	37.7876	6.23051e-09	2.77646e-08
ADGRF4	1.35324	4.03388	1.66961	6.29996	0.0428529	0.0812773
ADGRF5	1.00296	3.50011	1.95194	3.64062	0.161975	0.253013
ADGRG1	135.557	4.88837	0.276888	507.262	7.06922e-111	2.12305e-109
ADGRG2	2.21643	-0.517097	1.15252	0.308781	0.856937	0.899663
ADGRG6	39.5593	-4.49627	0.483881	218.809	3.06361e-48	4.40887e-47
ADGRL1	18.4303	0.431365	0.394723	5.54162	0.0626114	0.112781
ADGRL2	187.109	0.956891	0.126834	113.71	2.03293e-25	1.79249e-24
ADGRL4	943.849	2.39945	0.0770596	1011.85	1.90164e-220	1.079e-218
ADH5	822.28	-0.293467	0.0657017	24.7175	4.29211e-06	1.5283e-05
ADH6	1.32142	-1.18481	1.55962	1.35938	0.506774	0.624064
ADHFE1	9.56569	-0.495633	0.532793	7.54625	0.0229802	0.0467528
ADI1	169.742	0.511566	0.135158	14.9188	0.000575995	0.00158247
ADIPOR1	637.07	0.501083	0.0799431	47.1155	5.8748e-11	2.98172e-10
ADIPOR2	561.935	0.593348	0.0831754	73.5511	1.06804e-16	7.10402e-16
ADIRF	127.365	2.04972	0.170772	151.916	1.0276e-33	1.11343e-32
ADK	723.397	0.625422	0.070464	121.308	4.55395e-27	4.20752e-26
ADM	419.069	-2.12104	0.106036	470.807	5.82987e-103	1.63832e-101
ADM2	3.66521	-1.18693	0.955769	2.25561	0.323743	0.444762
ADM5	1.80077	-0.181424	1.22872	0.516403	0.77244	0.841375
ADNP	712.602	0.106643	0.0726141	4.89158	0.0866577	0.149397
ADNP.AS1	8.30875	0.239602	0.598864	0.234168	0.88951	0.922202
ADNP2	154.083	-0.122219	0.141591	4.0699	0.130687	0.211703
ADO	300.069	0.490074	0.110787	45.6445	1.22582e-10	6.10078e-10
ADORA1	1.9192	0.737896	1.22857	1.01147	0.603062	0.706866
ADORA2A.AS1	4.11002	1.36448	0.94346	4.80891	0.0903148	0.155073
ADORA2B	11.7063	-1.27057	0.506373	18.0071	0.00012297	0.000369981
ADPGK	297.553	-0.331219	0.108379	10.1701	0.00618854	0.0141474
ADPGK.AS1	1.0986	-1.41583	1.58364	2.1065	0.348803	0.470787
ADPRH	6.44942	-1.31606	0.742896	3.46793	0.176583	0.272594
ADPRHL1	4.98494	1.51927	0.817837	3.63845	0.162151	0.253261
ADPRHL2	91.0515	0.171609	0.182979	0.892828	0.639919	0.735222
ADPRM	30.6867	0.290118	0.316098	2.35589	0.307912	0.427636
ADRA1D	34.7022	-1.77395	0.313259	57.7769	2.84387e-13	1.6298e-12
ADRA2A	1.16596	2.89277	1.74599	3.25575	0.196346	0.298149
ADRB2	4.32928	-3.15094	1.05335	22.9824	1.02199e-05	3.49582e-05
ADRM1	317.993	0.257416	0.104415	6.23999	0.0441574	0.0833368
ADSL	229.465	-0.550599	0.119919	21.5138	2.12983e-05	7.03132e-05
ADSS	914.525	0.735781	0.0623616	213.695	3.95185e-47	5.56328e-46
ADSSL1	3.86376	-0.794175	0.844387	5.40887	0.0669083	0.119476
ADTRP	18.4036	4.31318	0.68264	63.839	1.37256e-14	8.36248e-14
AEBP1	797.358	0.059743	0.0763856	25.0018	3.7233e-06	1.33054e-05
AEBP2	373.674	-0.552804	0.093028	35.898	1.60269e-08	6.94219e-08
AEN	239.615	-0.448249	0.116204	19.77	5.09323e-05	0.000160858
AES	726.147	0.0519625	0.0731643	3.56315	0.168373	0.261577
AFAP1	1117.56	-1.19478	0.0629578	371.558	2.07561e-81	4.73978e-80
AFAP1.AS1	6.27694	-1.47706	0.751848	4.05272	0.131815	0.21325
AFAP1L1	12.6525	0.21904	0.474852	0.862496	0.649698	0.74387
AFDN	303.029	0.211906	0.102095	17.1164	0.000191967	0.000563099
AFF1	624.389	0.883958	0.0835843	125.901	4.58105e-28	4.35712e-27
AFF1.AS1	9.05929	-0.708907	0.589027	1.69542	0.428395	0.550339
AFF3	52.4446	-1.51845	0.246653	68.7208	1.19528e-15	7.63603e-15
AFF4	3866.02	0.539069	0.0412651	288.611	2.13295e-63	3.87634e-62
AFG1L	24.5038	-0.887168	0.351056	11.031	0.00402395	0.0095346
AFG3L1P	32.8243	-0.199832	0.299703	1.33595	0.512747	0.62975
AFG3L2	198.303	0.0366768	0.131817	0.0844508	0.958654	0.968031
AFMID	50.6425	0.0160829	0.243189	0.12124	0.941181	0.956363
AFTPH	305.875	0.462658	0.104314	21.4188	2.23336e-05	7.35351e-05
AGA	347.2	0.575221	0.0979671	39.7095	2.38337e-09	1.09457e-08
AGAP1	155.662	1.5808	0.149264	129.827	6.43185e-29	6.24941e-28
AGAP1.IT1	1.53652	3.07452	1.6172	4.1292	0.126869	0.206417
AGAP11	6.70577	0.423923	0.62681	6.09601	0.0474535	0.0886792
AGAP2	1.30376	-0.567207	1.53455	0.175341	0.916063	0.940093
AGAP2.AS1	13.2786	0.629508	0.474964	2.26884	0.321608	0.442401
AGAP3	191.472	0.342283	0.132266	8.74458	0.0126223	0.0272539
AGAP4	4.79572	0.785901	0.776599	1.73682	0.419619	0.542596
AGAP5	5.92187	-0.607786	0.697296	3.87363	0.144162	0.229899
AGAP6	36.5603	-0.229712	0.287375	0.951653	0.621371	0.72127
AGAP9	4.87129	-1.44741	0.834726	3.33798	0.188438	0.288114
AGBL2	2.94625	0.021184	1.01674	0.264439	0.876149	0.912806
AGBL3	2.82288	-2.13462	1.1614	4.28588	0.117309	0.193554
AGBL5	52.4353	-0.740386	0.251004	9.76474	0.00757902	0.017035
AGFG1	863.695	-0.0381668	0.0652959	53.1761	2.83757e-12	1.54179e-11
AGFG2	30.3498	-0.391233	0.332696	2.00406	0.367133	0.489929
AGGF1	339.155	-0.175989	0.0989577	5.6005	0.0607948	0.110029
AGK	17.5392	-0.430453	0.418259	1.25164	0.534822	0.648928
AGL	286.232	-0.340287	0.11601	11.8458	0.00267738	0.00658101
AGMAT	4.70772	-1.28453	0.843119	2.45723	0.292697	0.410455
AGO1	214.181	0.0373719	0.128373	0.390823	0.822496	0.876755
AGO2	918.65	0.718179	0.0678578	192.03	2.00096e-42	2.60248e-41
AGO3	98.2031	0.264377	0.184124	4.75062	0.0929854	0.158753
AGO4	123.779	-0.195474	0.157293	5.25127	0.0723936	0.127906
AGPAT2	126.059	0.11968	0.165481	0.73713	0.691726	0.777911
AGPAT3	666.916	-0.557032	0.075788	54.5944	1.39627e-12	7.73935e-12
AGPAT4	32.6266	-0.311025	0.313604	1.59469	0.450523	0.571164
AGPAT4.IT1	1.82013	-0.651544	1.2434	1.08108	0.582433	0.689093
AGPAT5	255.08	-0.231346	0.114022	17.6394	0.000147795	0.000440305
AGPS	288.06	-0.303389	0.103165	39.9197	2.14562e-09	9.88434e-09
AGRN	300.479	-0.61599	0.1266	56.4532	5.51238e-13	3.10995e-12
AGTPBP1	69.0811	-1.05034	0.219686	27.4754	1.08093e-06	4.05889e-06
AGTRAP	119.295	0.976954	0.163788	40.9151	1.30436e-09	6.11691e-09
AHCTF1	338.73	0.0791743	0.099188	16.1128	0.000317059	0.000905029
AHCTF1P1	124.378	0.140073	0.15853	12.2809	0.00215399	0.00539167
AHCY	294.692	-0.242651	0.106293	6.05619	0.0484077	0.0902017
AHCYL1	1332.89	0.749376	0.0553067	188.05	1.46383e-41	1.86792e-40
AHCYL2	134.394	0.625076	0.149617	18.6258	9.02522e-05	0.000276352
AHDC1	157.895	-0.478166	0.156498	14.4001	0.000746535	0.00201818
AHI1	494.998	1.23525	0.0844487	252.944	1.18538e-55	1.91126e-54
AHNAK	11530	-0.0597858	0.031003	6.62727	0.0363836	0.0702897
AHNAK2	780.285	1.20438	0.0699215	308.54	1.0034e-67	1.93973e-66
AHR	500.444	-1.81275	0.0886484	608.851	6.16273e-133	2.15059e-131
AHRR	223.572	-1.87982	0.128625	282.865	3.77273e-62	6.69278e-61
AHSA1	377.621	0.35907	0.0928954	29.3156	4.30721e-07	1.67928e-06
AHSA2P	173.361	-0.325979	0.141778	7.59062	0.0224759	0.0458273
AIDA	282.677	0.693735	0.108982	58.4484	2.03283e-13	1.17588e-12
AIFM1	114.496	-0.00901152	0.172335	0.15661	0.924682	0.945911
AIFM2	78.9817	-0.345083	0.20865	5.15965	0.0757872	0.13297
AIG1	201.365	-0.862323	0.132238	68.8643	1.11253e-15	7.11654e-15
AIM2	2.83878	5.21347	1.45892	14.5122	0.000705844	0.00191689
AIMP1	328.168	-0.50058	0.101875	27.4918	1.07207e-06	4.02868e-06
AIMP2	36.9758	-0.480346	0.292461	3.09966	0.212284	0.317486
AIP	88.1847	0.176243	0.184551	1.78216	0.410213	0.533384
AJAP1	73.2195	-1.04864	0.224006	22.6072	1.23286e-05	4.18632e-05
AJM1	8.35026	-0.581784	0.599168	5.48213	0.0645016	0.115695
AJUBA	241.424	-2.0474	0.131189	407.222	3.73966e-89	9.43868e-88
AK1	83.4115	0.172243	0.201786	2.15628	0.340227	0.461859
AK2	261.609	-0.627564	0.113421	34.0833	3.97111e-08	1.67712e-07
AK3	1067.62	0.120397	0.0633451	3.88658	0.143232	0.228758
AK4	15.9077	-0.544916	0.458462	3.43309	0.179686	0.276581
AK5	214.886	-0.819249	0.132051	106.267	8.40298e-24	7.07354e-23
AK9	24.2174	0.342968	0.372258	2.22251	0.329146	0.450311
AKAP1	65.9499	-0.220186	0.213925	4.09286	0.129195	0.209606
AKAP10	279.043	0.279844	0.106089	15.2905	0.000478311	0.00132858
AKAP11	1709.27	0.0380684	0.0515317	78.5385	8.82217e-18	6.07177e-17
AKAP12	2025.55	0.862835	0.0491187	590.905	4.8609e-129	1.6612e-127
AKAP13	531.177	0.0369396	0.0793367	16.4306	0.000270488	0.000778825
AKAP2	2.5531	0.681905	1.08528	0.507944	0.775714	0.843772
AKAP3	8.45119	2.95602	0.775698	19.8445	4.90702e-05	0.00015544
AKAP5	20.1561	-2.62013	0.461148	75.1802	4.72961e-17	3.17285e-16
AKAP6	49.9613	-0.728565	0.238748	53.0313	3.05075e-12	1.6552e-11
AKAP7	10.3257	-1.65249	0.569636	11.4089	0.00333116	0.0080326
AKAP8	141.714	0.236243	0.1535	4.19242	0.122922	0.201184
AKAP8L	91.6539	-0.101244	0.184351	0.508195	0.775616	0.843772
AKAP9	1015.57	0.140082	0.059161	10.1253	0.00632861	0.0144341
AKIP1	121.227	0.262258	0.159801	3.20536	0.201356	0.304203
AKIRIN1	869.825	1.09807	0.0687403	257.46	1.23951e-56	2.03384e-55
AKIRIN2	222.025	0.281544	0.117792	8.6129	0.0134813	0.0289698
AKNA	31.8948	0.677965	0.310641	6.27266	0.0434419	0.0821742
AKNAD1	3.02888	0.34334	1.07263	0.248544	0.88314	0.917581
AKR1A1	174.941	0.663791	0.135972	25.4115	3.0337e-06	1.09304e-05
AKR1B1	2369.25	1.49368	0.0880934	338.074	3.87479e-74	8.02265e-73
AKR1C1	74.743	0.634591	0.206229	14.3437	0.000767887	0.00207251
AKR1C2	2.32184	-3.08565	1.56336	3.81895	0.148158	0.235111
AKR1C3	3.55075	-1.93361	1.09979	3.71073	0.156396	0.245484
AKR1E2	4.57288	-0.854316	0.832927	1.61783	0.445341	0.566818
AKR7A2	180.137	0.744203	0.135113	38.5319	4.29434e-09	1.93982e-08
AKR7A2P1	4.49036	0.386345	0.870306	1.59045	0.451479	0.571987
AKR7A3	1.28637	1.09568	1.68225	1.86472	0.393624	0.516516
AKR7L	0.833385	-0.165579	1.99578	1.35759	0.507228	0.624413
AKT1	696.049	-0.313838	0.0708141	19.9892	4.56463e-05	0.000144995
AKT1S1	266.517	0.450953	0.110216	42.9023	4.82937e-10	2.31966e-09
AKT2	364.189	-0.0596238	0.0962068	0.470585	0.79034	0.854052
AKTIP	22.8935	-1.20962	0.389064	19.5873	5.58049e-05	0.00017502
ALAD	171.915	0.139297	0.133414	1.27037	0.529837	0.64509
ALAS1	204.654	0.775324	0.136569	37.7528	6.33994e-09	2.82184e-08
ALCAM	1249.01	-1.66327	0.0568531	1789.67	0	0
ALDH16A1	47.8059	-0.341814	0.252103	3.61862	0.163767	0.255446
ALDH18A1	497.715	-0.507707	0.0811306	70.6003	4.67032e-16	3.04513e-15
ALDH1A1	316.247	-4.92411	0.188558	2294.65	0	0
ALDH1B1	125.746	-2.4896	0.186834	270.123	2.20606e-59	3.75232e-58
ALDH1L2	289.963	-1.5933	0.119178	244.351	8.70883e-54	1.36711e-52
ALDH2	96.1067	-0.373616	0.188023	10.9587	0.00417206	0.00985725
ALDH3A2	90.9146	1.01676	0.180458	39.3893	2.79726e-09	1.27833e-08
ALDH3B1	82.2244	-1.01636	0.201977	54.8626	1.22107e-12	6.80631e-12
ALDH4A1	40.4175	-1.94553	0.304749	66.3816	3.84958e-15	2.40554e-14
ALDH5A1	3.12366	-0.880453	0.949277	4.27665	0.117852	0.194298
ALDH6A1	103.669	-1.02159	0.177792	40.4566	1.64041e-09	7.62072e-09
ALDH7A1	109.724	-1.00603	0.168513	68.6716	1.22502e-15	7.82265e-15
ALDH9A1	641.73	0.160811	0.0740026	4.75409	0.0928246	0.15854
ALDOA	2799.44	0.504998	0.0511729	106.718	6.70652e-24	5.65508e-23
ALDOC	21.2066	-0.519957	0.390871	2.13254	0.344291	0.466225
ALG1	58.1871	0.307726	0.227435	2.29796	0.31696	0.437382
ALG10	21.4817	-1.10414	0.404739	8.7267	0.0127357	0.0274787
ALG10B	76.0014	-0.434181	0.193794	18.2683	0.000107916	0.000327174
ALG11	58.1355	-0.732823	0.24054	9.56303	0.00838327	0.0187266
ALG12	92.7312	0.170616	0.179658	2.92541	0.231609	0.3408
ALG13	260.692	0.0687557	0.109405	5.87844	0.0529069	0.0974133
ALG14	55.5825	-0.406097	0.241556	3.37855	0.184653	0.283054
ALG1L9P	1.26195	-2.14189	1.84803	1.43167	0.488783	0.607953
ALG2	357.999	0.0458783	0.0966914	2.27433	0.320728	0.441558
ALG3	206.488	0.411027	0.126969	12.0762	0.00238607	0.00591292
ALG5	151.019	0.0613999	0.151149	0.223585	0.89423	0.925096
ALG6	47.479	-0.70232	0.266726	9.45926	0.00882975	0.0196413
ALG8	254.374	-0.0570217	0.111134	0.301484	0.86007	0.901636
ALG9	132.001	-0.551805	0.152605	15.3439	0.000465715	0.00129602
ALKBH1	71.3394	0.182971	0.206999	2.39492	0.301961	0.421339
ALKBH2	23.4224	-0.707289	0.37775	4.1136	0.127863	0.207897
ALKBH3	46.6195	-0.523699	0.257186	4.57347	0.101598	0.171251
ALKBH3.AS1	1.80288	-0.260425	1.29037	0.933765	0.626954	0.725541
ALKBH4	15.74	-0.149828	0.465079	0.431583	0.805903	0.865681
ALKBH5	383.368	0.304319	0.097243	11.0833	0.00392004	0.00930836
ALKBH6	42.7375	-0.087361	0.278292	2.56962	0.276703	0.393069
ALKBH7	55.0615	0.555372	0.248429	5.04385	0.0803049	0.139824
ALKBH8	131.021	0.61421	0.160659	25.1968	3.37737e-06	1.21158e-05
ALMS1	127.532	-0.629328	0.157277	16.3279	0.000284741	0.000817173
ALMS1.IT1	2.59336	-0.788533	1.24191	1.07186	0.585125	0.691342
ALOX12	4.3004	-0.710024	0.806738	4.03937	0.132697	0.214445
ALOX12.AS1	4.61889	-0.794898	0.791822	1.82684	0.401149	0.524078
ALOXE3	6.56171	3.00312	0.856951	13.9246	0.000946907	0.00251955
ALPK1	46.1925	-1.10542	0.281046	16.5025	0.000260926	0.000752751
ALPK2	315.817	-2.86893	0.131986	731.476	1.45226e-159	6.06442e-158
ALPK3	2.07816	0.21846	1.23097	0.21614	0.897565	0.927359
ALPL	2.84892	-0.194481	1.30354	8.42438	0.0148139	0.0315823
ALS2	388.928	-0.923301	0.0945636	151.445	1.30035e-33	1.40691e-32
ALS2CL	6.93685	-1.6045	0.717965	6.17304	0.0456607	0.0858469
ALS2CR12	4.98444	0.280415	0.768767	0.146665	0.929292	0.948562
ALX3	5.28174	0.390238	0.743905	0.311977	0.855569	0.898587
ALYREF	131.678	-0.159059	0.154162	2.77159	0.250125	0.363044
AMACR	2.74838	-0.0255969	1.05293	0.0176747	0.991202	0.992336
AMBRA1	116.675	0.373348	0.164498	5.18337	0.0748936	0.131619
AMD1	1680.69	-0.288874	0.0542813	32.3723	9.34213e-08	3.83223e-07
AMDHD1	2.35633	3.76075	1.50786	7.44001	0.0242339	0.0490151
AMDHD2	36.8766	0.828452	0.290033	9.81334	0.00739707	0.0166538
AMER1	25.8489	-0.596951	0.348995	3.0108	0.221929	0.329191
AMFR	631.013	-0.0596417	0.0783368	1.99867	0.368125	0.490855
AMH	1.99931	1.24402	1.20551	2.08372	0.352797	0.474847
AMIGO1	18.1588	-0.766413	0.414556	6.11991	0.0468899	0.0878469
AMIGO2	29.0892	-3.55931	0.451762	142.873	9.45159e-32	9.81197e-31
AMIGO3	18.153	-0.384085	0.409642	1.86612	0.393348	0.516245
AMMECR1	285.187	0.075978	0.108382	38.2126	5.03782e-09	2.26192e-08
AMMECR1L	298.789	0.381104	0.104392	22.0842	1.6013e-05	5.37478e-05
AMN1	50.371	0.525106	0.248667	5.26009	0.0720751	0.12745
AMOT	4.92951	-1.02942	0.802491	4.25988	0.118845	0.195675
AMOTL1	787.573	-0.438454	0.071922	57.668	3.00297e-13	1.71965e-12
AMOTL2	376.713	-2.76518	0.121502	782.348	1.30426e-170	5.85773e-169
AMPD2	552.074	0.275481	0.0834326	45.2811	1.47005e-10	7.29433e-10
AMPD3	460.867	2.34027	0.111627	1073.38	8.26916e-234	4.99713e-232
AMPH	26.3776	-0.515661	0.338586	10.8587	0.00438591	0.0103231
AMT	8.45277	-1.64098	0.684352	6.76305	0.0339956	0.0661404
AMY2B	19.3633	0.126857	0.407405	0.887129	0.641745	0.736921
AMZ1	53.4905	0.315023	0.2515	2.44415	0.294619	0.4128
AMZ2	209.46	-0.183852	0.127997	4.81546	0.0900193	0.154655
AMZ2P1	12.7237	-1.23077	0.505397	9.68212	0.00789867	0.0177187
ANAPC1	117.023	-0.351731	0.163971	6.10303	0.0472873	0.0884243
ANAPC10	68.7313	-0.240817	0.210453	2.06819	0.355548	0.477943
ANAPC11	258.863	-0.0426073	0.115009	8.32968	0.0155322	0.0329624
ANAPC13	419.796	-0.538138	0.0915707	35.4746	1.9806e-08	8.51958e-08
ANAPC15	11.3642	0.503187	0.523046	0.988884	0.609911	0.712267
ANAPC16	215.159	-0.530125	0.124709	21.7334	1.9083e-05	6.3323e-05
ANAPC2	75.983	-0.119267	0.200466	0.370791	0.830776	0.882606
ANAPC4	172.807	-0.288357	0.137246	6.35093	0.0417747	0.0795061
ANAPC5	480.314	-0.242482	0.0830638	13.0656	0.00145493	0.00375895
ANAPC7	286.937	0.0886243	0.103285	2.18759	0.334943	0.456562
ANG	5.20392	2.08366	0.887908	7.12475	0.0283714	0.0563843
ANGEL1	107.903	0.363474	0.169521	4.62582	0.098973	0.16754
ANGEL2	248.559	-0.256232	0.114178	6.93277	0.0312297	0.0613696
ANGPT1	273.451	-4.45273	0.181401	1789.02	0	0
ANGPT2	2.97983	-0.930624	1.02137	1.00034	0.606427	0.709574
ANGPTL1	6.67629	-0.756843	0.689897	4.08601	0.129639	0.210187
ANGPTL2	57.1119	0.13724	0.223576	16.6314	0.00024465	0.000707442
ANGPTL4	433.447	5.50941	0.191366	1581.22	0	0
ANK1	45.4656	-2.14186	0.289998	117.036	3.85433e-26	3.46843e-25
ANK2	10.3858	-0.557502	0.522746	6.16279	0.0458953	0.0862444
ANK3	45.1278	7.84979	1.19707	216.306	1.07083e-47	1.52627e-46
ANKAR	15.5214	-0.803536	0.446737	3.79929	0.149622	0.237054
ANKDD1A	40.9239	-0.746506	0.291514	6.70638	0.0349727	0.0678371
ANKDD1B	1.56644	-0.229	1.34001	0.634318	0.728215	0.807245
ANKEF1	8.89826	-5.55306	1.23331	48.7465	2.59912e-11	1.34301e-10
ANKFY1	738.468	-0.162682	0.0750674	12.1719	0.0022746	0.00566686
ANKH	603.901	1.41985	0.0832743	294.258	1.26656e-64	2.34479e-63
ANKHD1	48.033	0.0553729	0.260818	0.276431	0.870911	0.909507
ANKIB1	906.628	-0.131663	0.0620969	4.60985	0.0997663	0.16869
ANKLE1	3.33268	0.858749	0.943088	1.1266	0.569328	0.678161
ANKLE2	498.636	0.432447	0.0799074	30.6459	2.21475e-07	8.8057e-07
ANKMY1	16.3368	0.00917681	0.440988	1.52669	0.466105	0.585923
ANKMY2	149.913	-0.468064	0.148107	12.7906	0.0016694	0.00426707
ANKRA2	150.013	0.0510135	0.144197	0.907257	0.635319	0.731561
ANKRD1	3.391	-5.35338	1.38448	31.6725	1.32555e-07	5.36208e-07
ANKRD10	216.878	0.225521	0.126148	10.5269	0.00517747	0.0120508
ANKRD11	962.521	0.247837	0.0623732	16.1145	0.000316801	0.000904466
ANKRD12	820.683	-0.149554	0.0679699	5.20882	0.0739467	0.130248
ANKRD13A	851.928	-1.843	0.0732949	786.893	1.34407e-171	6.09177e-170
ANKRD13B	10.3123	-0.547599	0.535484	1.08046	0.582615	0.689198
ANKRD13C	312.649	0.236327	0.102283	8.85533	0.0119424	0.0258986
ANKRD13D	101.2	0.452074	0.189583	8.02548	0.0180837	0.0378212
ANKRD16	12.9193	-0.524906	0.488717	1.43103	0.488941	0.608098
ANKRD17	1112.05	0.187979	0.0595557	28.7067	5.84002e-07	2.2515e-06
ANKRD18B	7.12835	-1.29657	0.665255	7.51783	0.0233091	0.0473119
ANKRD19P	13.4906	0.00480149	0.484355	0.0611517	0.969887	0.975728
ANKRD23	6.73907	-0.0820653	0.696086	0.0728547	0.964228	0.971848
ANKRD24	0.90651	1.57841	1.9522	1.26593	0.531016	0.646156
ANKRD26	224.708	-0.0380452	0.124388	0.143678	0.930681	0.94943
ANKRD27	181.522	-0.277089	0.135045	4.25688	0.119023	0.195852
ANKRD28	726.228	-0.250359	0.0722245	13.3853	0.00124	0.00324196
ANKRD29	188.164	1.39597	0.138859	121.395	4.359e-27	4.03241e-26
ANKRD33B	27.0234	-2.08539	0.36001	80.0549	4.13342e-18	2.88621e-17
ANKRD34A	34.3497	-1.104	0.313721	13.2819	0.00130577	0.00339897
ANKRD35	3.16608	-1.01593	1.00037	1.11493	0.572658	0.680615
ANKRD36	16.2782	-0.764061	0.430061	5.50462	0.0637802	0.114539
ANKRD36B	7.06809	-0.683303	0.653888	1.25741	0.533281	0.647617
ANKRD36BP1	117.349	-0.212883	0.176679	6.32236	0.0423758	0.080475
ANKRD36C	32.4592	-0.856508	0.345321	7.89958	0.0192588	0.0400085
ANKRD37	4.75641	2.08196	0.918873	5.60676	0.0606048	0.109725
ANKRD39	30.2466	0.257677	0.312663	0.748331	0.687863	0.774914
ANKRD40	541.636	-0.0573028	0.0829583	4.44286	0.108454	0.181033
ANKRD42	179.83	0.295144	0.139221	11.3865	0.00336866	0.00811355
ANKRD44	132.73	1.72699	0.154206	149.296	3.809e-33	4.07078e-32
ANKRD45	1.0264	-3.26022	1.80961	4.3234	0.115129	0.190485
ANKRD46	101.174	0.97014	0.192729	28.3107	7.11884e-07	2.72333e-06
ANKRD49	67.0556	-0.122653	0.223511	2.81077	0.245273	0.357368
ANKRD50	742.874	0.506279	0.0762562	46.5933	7.62772e-11	3.84385e-10
ANKRD52	861.462	0.287957	0.0668546	19.2091	6.74211e-05	0.00020999
ANKRD53	1.30691	-3.64803	1.66426	6.04849	0.0485946	0.0905045
ANKRD54	107.312	0.481777	0.174293	7.8731	0.0195154	0.0404907
ANKRD6	4.948	0.160375	0.772599	0.0937399	0.954211	0.964921
ANKRD61	5.32663	-0.748378	0.751996	2.57751	0.275613	0.391829
ANKRD65	0.941978	0.127556	1.77993	0.66022	0.718845	0.799637
ANKRD9	66.9953	-0.277313	0.217433	1.91658	0.383549	0.50647
ANKS1A	155.195	0.396817	0.152455	14.7063	0.000640575	0.00174698
ANKS1B	2.72807	-1.63838	1.16154	2.12685	0.345271	0.467255
ANKS3	29.9701	-0.423874	0.331221	4.93947	0.0846075	0.146338
ANKS6	62.2641	-0.320353	0.223536	9.40058	0.00909265	0.0201869
ANKZF1	47.9367	0.152012	0.24394	1.28331	0.52642	0.642052
ANLN	527.866	-4.64249	0.148945	1813.58	0	0
ANO10	485.95	0.362501	0.0845273	72.7816	1.56921e-16	1.03818e-15
ANO3	11.3105	-1.74508	0.572797	13.0875	0.00143905	0.00372244
ANO4	51.0131	-2.45264	0.288038	125.338	6.069e-28	5.75761e-27
ANO6	1138.43	-0.35074	0.0600785	49.1233	2.15284e-11	1.11707e-10
ANO7	7.88915	2.67189	0.744427	14.8615	0.000592738	0.00162516
ANO8	21.6063	1.16695	0.375134	10.1168	0.00635576	0.014491
ANOS1	259.168	6.39798	0.337865	1048.64	1.95752e-228	1.15022e-226
ANP32A	240.571	-0.292399	0.118318	6.2459	0.0440271	0.0831225
ANP32A.IT1	3.71844	1.45629	0.997166	4.10244	0.128578	0.208787
ANP32AP1	11.0488	-0.489819	0.56281	0.992776	0.608725	0.711144
ANP32B	445.144	-1.16512	0.0910628	170.257	1.06926e-37	1.25657e-36
ANP32C	4.99908	-0.173217	0.801086	0.907987	0.635087	0.731536
ANP32D	1.58645	0.161449	1.43545	0.424547	0.808743	0.867695
ANP32E	583.968	-0.252151	0.0806569	10.0626	0.00653016	0.0148595
ANPEP	10641.1	2.12448	0.0376324	4415.69	0	0
ANTXR1	1198.01	-0.705063	0.0680672	123.897	1.24744e-27	1.17147e-26
ANTXR2	919.981	0.616735	0.0640979	215.176	1.88437e-47	2.66791e-46
ANXA1	8525.78	1.19147	0.0372465	1013.52	8.25667e-221	4.70282e-219
ANXA10	183.637	5.454	0.341675	768.015	1.68936e-167	7.40829e-166
ANXA11	527.084	-0.635152	0.0837802	82.948	9.72923e-19	6.96699e-18
ANXA2	3684.7	-0.0189554	0.0382032	180.194	7.43604e-40	9.15101e-39
ANXA2P1	96.9475	-0.123319	0.191103	9.81398	0.00739472	0.016651
ANXA2P2	1851.9	-0.118007	0.0478175	84.9672	3.5449e-19	2.57191e-18
ANXA2P3	39.5062	-0.143747	0.273904	3.86913	0.144487	0.230367
ANXA2R	10.9478	2.00125	0.567479	13.2712	0.00131278	0.00341604
ANXA3	10.5148	-3.98053	0.841433	43.3462	3.86801e-10	1.8718e-09
ANXA4	538.705	-0.100748	0.0857624	22.0391	1.63786e-05	5.4876e-05
ANXA5	4019.83	-0.593538	0.0386533	237.063	3.32938e-52	5.11307e-51
ANXA6	1148.99	-0.731123	0.0572583	258.133	8.85418e-57	1.45766e-55
ANXA7	880.155	-0.0014034	0.063449	0.706141	0.702528	0.786547
ANXA9	4.4854	0.468969	0.820532	0.333574	0.84638	0.893183
AOC2	4.66602	0.383168	0.803962	0.600855	0.740502	0.817124
AOC3	1.34863	2.75949	1.73263	2.83369	0.242478	0.354059
AOX1	180.515	-2.57173	0.1654	286.271	6.87013e-63	1.23347e-61
AP1AR	561.796	1.43502	0.0851354	380.263	2.67306e-83	6.28762e-82
AP1B1	379.642	-0.267107	0.0934849	15.8812	0.000355992	0.00100953
AP1G1	970.018	-0.0534204	0.0656014	10.7034	0.00474005	0.0111004
AP1G2	30.6913	-0.672733	0.307953	7.74329	0.0208241	0.0428709
AP1M1	316.66	-0.045866	0.101964	3.89839	0.142388	0.227509
AP1S1	275.747	0.408674	0.111777	18.5906	9.1855e-05	0.000281028
AP1S2	178.402	0.472156	0.13256	32.6967	7.94334e-08	3.27834e-07
AP1S3	44.7219	-1.15599	0.260939	64.3927	1.04066e-14	6.36906e-14
AP2A1	332.233	-0.043961	0.0975641	4.97123	0.0832745	0.144305
AP2A2	23.4423	0.513666	0.354886	2.56673	0.277103	0.393525
AP2B1	1099.06	-0.387864	0.0643681	41.555	9.47207e-10	4.4816e-09
AP2M1	1975.72	-0.112479	0.0451273	40.5154	1.5929e-09	7.41392e-09
AP2S1	492.579	0.636876	0.0797628	64.0646	1.22614e-14	7.48267e-14
AP3B1	774.869	0.429127	0.0671717	42.5058	5.88825e-10	2.82006e-09
AP3D1	1033.81	0.10589	0.0610763	11.5554	0.00309589	0.00752018
AP3M1	592.77	-0.0811216	0.0755396	7.36675	0.025138	0.0506715
AP3M2	127.7	-0.318017	0.163407	5.04683	0.0801855	0.139648
AP3S1	472.557	-0.219889	0.0864172	7.31731	0.0257671	0.0517991
AP3S2	6.82982	-0.598716	0.670839	2.1094	0.348297	0.470323
AP4B1	42.4084	-0.465998	0.283159	2.87527	0.237489	0.348108
AP4B1.AS1	4.34536	0.227979	0.903376	2.86546	0.238657	0.349509
AP4E1	300.235	0.035086	0.110584	0.266958	0.875046	0.91203
AP4M1	41.7212	1.24666	0.288671	18.9214	7.78522e-05	0.000240764
AP4S1	41.1261	-0.0815218	0.275586	0.384714	0.825012	0.87843
AP5B1	104.689	0.741929	0.17632	19.925	4.7135e-05	0.000149628
AP5M1	389.396	-0.172867	0.0911183	4.09337	0.129162	0.209575
AP5S1	46.7078	0.199406	0.249319	1.26376	0.531593	0.64645
AP5Z1	145.182	0.510186	0.145507	13.9327	0.000943105	0.00251078
APAF1	305.594	-0.0432893	0.102897	5.82764	0.054268	0.099488
APBA1	14.2167	0.93747	0.528757	16.0436	0.000328228	0.000935296
APBA2	1.41655	-0.443693	1.4158	0.224922	0.893632	0.92467
APBA3	41.0119	0.0281059	0.271451	0.0576361	0.971593	0.976982
APBB1	159.699	0.469521	0.137304	11.9503	0.00254114	0.00626582
APBB1IP	325.316	-0.421915	0.104705	19.2108	6.73625e-05	0.000209851
APBB2	772.224	0.0535048	0.0724837	173.843	1.78011e-38	2.12215e-37
APBB3	21.928	-0.246364	0.377796	3.00039	0.223086	0.330465
APC	530.069	-0.589938	0.0817361	53.648	2.24126e-12	1.22585e-11
APC2	9.99936	1.18114	0.553105	9.27053	0.00970356	0.0214343
APCDD1	22.2849	-2.54218	0.443851	53.7878	2.08987e-12	1.146e-11
APCDD1L	591.682	2.24635	0.0900506	710.645	4.84682e-155	1.96329e-153
APCDD1L.DT	46.4393	1.53888	0.281824	34.1033	3.93159e-08	1.66137e-07
APEH	191.026	-0.504662	0.128356	16.4572	0.000266916	0.000768986
APEX1	506.918	-0.135356	0.0805196	4.22358	0.121021	0.198423
APEX2	67.0796	0.0250002	0.215313	1.09949	0.577096	0.684656
APH1A	304.48	-0.315514	0.113648	8.51801	0.0141364	0.0302202
APH1B	291.741	0.937819	0.108941	74.5515	6.47655e-17	4.3311e-16
API5	691.591	-0.135436	0.0712285	6.37849	0.0412029	0.0785868
APIP	158.534	0.455007	0.147068	17.9416	0.000127064	0.000381989
APLF	26.1751	-0.352764	0.340972	1.14145	0.565115	0.675105
APLP1	18.0813	-0.159396	0.387009	7.98749	0.0184306	0.0384763
APLP2	6436.16	0.848395	0.0366951	637.078	4.57402e-139	1.6707e-137
APMAP	468.245	0.335747	0.0827446	20.6095	3.34734e-05	0.000107966
APOA1.AS	1.03361	0.377234	1.65528	0.493958	0.781157	0.847332
APOBEC2	0.984324	-0.0642774	1.70664	3.86797	0.144571	0.230477
APOBEC3B	4.70789	-5.27124	1.35036	18.8656	8.00561e-05	0.000247065
APOBEC3C	94.0591	-0.491429	0.182047	17.9998	0.000123421	0.000371262
APOBEC3D	3.96076	0.262537	0.886696	0.575614	0.749906	0.824381
APOBEC3F	13.7424	0.260849	0.459998	7.91656	0.0190959	0.0397146
APOBEC3G	12.1327	0.745648	0.492356	3.4125	0.181545	0.278836
APOC1	1.23932	0.692998	1.55358	0.382887	0.825766	0.879107
APOD	8.26717	-0.569508	0.611507	1.49411	0.47376	0.593538
APOE	1.9026	-1.76969	1.39455	1.72489	0.422129	0.544832
APOL1	15.9098	-2.6418	0.513382	64.1368	1.1827e-14	7.22349e-14
APOL2	77.7568	-0.391779	0.187655	91.3693	1.44351e-20	1.09263e-19
APOL3	5.41579	-1.85764	0.795286	10.903	0.00428994	0.0101101
APOL6	141.578	-1.20358	0.160027	115.6	7.90339e-26	7.05657e-25
APOLD1	74.1559	-1.38849	0.206844	74.5298	6.54715e-17	4.37634e-16
APOO	27.0683	0.0529285	0.330391	2.59163	0.273675	0.389699
APOOL	224.372	-0.361517	0.123843	8.84209	0.0120217	0.0260441
APOPT1	156.966	0.185393	0.140722	1.9375	0.379557	0.502403
APP	4372.6	0.547929	0.041545	213.579	4.18767e-47	5.88412e-46
APPBP2	666.838	-0.149099	0.0796751	3.9411	0.13938	0.223519
APPL1	489.666	0.381632	0.0825768	28.5883	6.19622e-07	2.38326e-06
APPL2	617.017	-0.81637	0.0746495	132.237	1.92773e-29	1.8966e-28
APRT	246.928	0.166788	0.117499	6.61826	0.0365479	0.0705759
APTR	22.111	-0.667302	0.368778	6.03095	0.0490225	0.0911417
APTX	119.018	-0.0680948	0.166593	2.02355	0.363573	0.486328
AQP1	1.71591	-2.02144	1.38735	3.25413	0.196506	0.298282
AQP11	11.7815	0.115018	0.504234	0.65957	0.719078	0.799837
AQP3	1.04418	-1.53684	1.76894	0.737194	0.691704	0.777911
AQR	340.086	0.0477237	0.0992507	0.24728	0.883698	0.918033
AR	199.79	-0.667608	0.124234	57.3	3.60969e-13	2.05837e-12
ARAF	160.91	-0.082242	0.14194	2.22597	0.328577	0.449865
ARAP1	391.166	0.859882	0.101248	105.359	1.32335e-23	1.10709e-22
ARAP1.AS2	3.37194	1.44578	0.995649	2.25442	0.323935	0.444985
ARAP3	131.514	1.16346	0.17195	74.8262	5.6455e-17	3.78216e-16
ARC	1.98445	3.75185	1.61831	9.37132	0.00922663	0.0204568
ARCN1	2575.84	0.563285	0.0456605	159.887	1.90944e-35	2.14394e-34
AREG	431.148	2.62285	0.117812	769.058	1.00282e-167	4.43689e-166
AREL1	333.032	0.983486	0.102659	99.601	2.35466e-22	1.89315e-21
ARF1	2796.21	0.256656	0.0409285	103.391	3.53926e-23	2.92142e-22
ARF3	818.294	0.451507	0.0684608	49.796	1.53794e-11	8.0475e-11
ARF4	3669.05	0.173261	0.0434899	17.2322	0.000181165	0.00053278
ARF4.AS1	1.5443	-1.99697	1.46665	3.13451	0.208617	0.312852
ARF5	188.297	0.0175333	0.12769	2.95259	0.228482	0.336966
ARF6	844.702	-0.97326	0.0675344	282.42	4.71301e-62	8.33099e-61
ARFGAP1	371.378	0.348542	0.0955379	14.5448	0.000694442	0.001888
ARFGAP2	138.474	-0.280031	0.151018	3.43437	0.179571	0.276489
ARFGAP3	681.543	0.215059	0.0713076	13.7654	0.00102538	0.00271764
ARFGEF1	676.68	0.00109743	0.0719918	3.41339	0.181464	0.27874
ARFGEF2	831.347	0.119536	0.0659142	17.3695	0.000169148	0.000499415
ARFGEF3	1.37164	1.34364	1.54055	1.74658	0.417575	0.54031
ARFIP1	456.581	0.107342	0.0887775	2.79576	0.247121	0.359426
ARFIP2	208.735	0.426461	0.124797	13.9258	0.000946358	0.00251854
ARFRP1	96.4305	-0.210174	0.181783	1.62483	0.443785	0.565419
ARG2	158.979	1.46271	0.149417	109.367	1.78382e-24	1.52667e-23
ARGLU1	522.118	-0.23728	0.0785173	10.0013	0.00673348	0.0152964
ARHGAP1	518.92	-0.137374	0.0827456	2.89963	0.234614	0.344539
ARHGAP10	188.862	-0.25485	0.128939	4.18941	0.123107	0.201398
ARHGAP11A	1.37695	-0.498755	1.4966	0.204852	0.902645	0.930886
ARHGAP12	482.515	-0.151171	0.0846455	7.63179	0.022018	0.0450047
ARHGAP17	212.165	-0.358019	0.121553	26.2808	1.96427e-06	7.18878e-06
ARHGAP18	810.278	-0.184436	0.0717971	50.7146	9.71559e-12	5.14359e-11
ARHGAP19	95.9848	1.11132	0.182002	41.6234	9.15351e-10	4.3364e-09
ARHGAP20	23.424	-4.52657	0.61592	162.922	4.18676e-36	4.78405e-35
ARHGAP21	1139.97	0.722258	0.0611119	232.638	3.04275e-51	4.62038e-50
ARHGAP22	498.724	1.57938	0.0888263	481.153	3.30355e-105	9.4808e-104
ARHGAP22.IT1	1.07821	0.740331	1.80344	0.766946	0.68149	0.769347
ARHGAP23	13.9671	0.00724739	0.472974	0.00114407	0.999428	0.999428
ARHGAP24	418.592	0.728325	0.0949337	133.331	1.11547e-29	1.10183e-28
ARHGAP26	41.0945	1.25174	0.280032	25.0682	3.60168e-06	1.28801e-05
ARHGAP27P1	16.7076	0.803401	0.433269	4.03616	0.13291	0.214695
ARHGAP27P1.BPTFP1.KPNA2P3	82.7985	1.48176	0.208147	53.9942	1.88499e-12	1.03786e-11
ARHGAP28	5.94117	1.5713	0.730434	4.76136	0.0924876	0.158055
ARHGAP29	1634.48	-3.18093	0.0658753	3099.69	0	0
ARHGAP31	238.925	0.735075	0.119876	75.7423	3.57086e-17	2.4031e-16
ARHGAP32	124.867	0.272799	0.158571	3.10845	0.211353	0.316411
ARHGAP33	9.71476	-2.4821	0.667566	18.7991	8.276e-05	0.00025467
ARHGAP35	512.368	-0.779217	0.087059	88.5012	6.05637e-20	4.48824e-19
ARHGAP39	29.8088	0.87654	0.323338	7.72097	0.0210578	0.0432952
ARHGAP42	33.5964	0.71297	0.304117	5.77033	0.0558454	0.102141
ARHGAP44	13.1844	-0.425174	0.481536	1.66088	0.435856	0.557707
ARHGAP45	7.81069	-0.184619	0.621561	0.227805	0.892345	0.92392
ARHGAP5	1931.03	1.15174	0.0569938	429.603	5.16328e-94	1.37558e-92
ARHGAP5.AS1	37.2334	2.97008	0.350644	86.5137	1.63603e-19	1.19927e-18
ARHGAP6	12.6563	-0.774527	0.488755	8.07897	0.0176065	0.0369009
ARHGAP9	0.948806	-0.331019	1.9387	1.23081	0.540422	0.653906
ARHGDIA	690.899	-0.213182	0.0702171	10.524	0.00518481	0.0120655
ARHGDIB	5.63134	-3.02178	0.931338	17.2631	0.000178385	0.000525124
ARHGEF1	173.681	0.225144	0.135281	2.84855	0.240682	0.351887
ARHGEF10L	47.8433	0.393278	0.259567	4.80101	0.0906723	0.155543
ARHGEF11	233.905	0.472581	0.114414	19.7111	5.24548e-05	0.000165343
ARHGEF12	1957.96	-0.130665	0.0491869	7.21529	0.0271156	0.0541443
ARHGEF17	405.889	-0.833393	0.0901785	104.123	2.45412e-23	2.03531e-22
ARHGEF18	124.508	0.172183	0.158142	1.20558	0.547282	0.659044
ARHGEF19	13.8836	0.22514	0.480904	0.444582	0.800682	0.861845
ARHGEF2	252.454	-0.158986	0.118093	13.2402	0.00133332	0.00346403
ARHGEF25	66.885	-0.0369381	0.22194	0.0635107	0.968744	0.974974
ARHGEF28	251.2	-0.59012	0.122299	25.2634	3.26686e-06	1.17392e-05
ARHGEF3	42.0295	1.54575	0.277093	32.7738	7.64286e-08	3.15871e-07
ARHGEF33	3.77126	-2.51172	1.0784	7.75419	0.0207109	0.0426862
ARHGEF35	1.04882	-2.01969	1.77108	1.58001	0.453842	0.574257
ARHGEF37	1.69916	-2.96364	1.58601	7.1722	0.0277062	0.0551675
ARHGEF38	3.22789	-1.19212	0.976668	3.17394	0.204544	0.30808
ARHGEF39	7.72727	-0.874978	0.696863	2.50398	0.285935	0.403485
ARHGEF4	7.33468	-1.90038	0.733618	8.84776	0.0119876	0.0259854
ARHGEF40	351.143	0.425527	0.0967987	19.5471	5.69367e-05	0.000178457
ARHGEF5	0.894407	-2.95086	1.94013	2.96041	0.227591	0.335818
ARHGEF6	90.0731	1.27175	0.18897	46.8109	6.84127e-11	3.45926e-10
ARHGEF7	348.67	0.313912	0.0946039	12.4499	0.00197945	0.00499094
ARHGEF9	46.2715	-0.705555	0.255014	8.82657	0.0121153	0.0262317
ARID1A	411.586	-0.507871	0.0958671	28.0604	8.06791e-07	3.07138e-06
ARID1B	386.037	0.275776	0.0947283	14.2396	0.000808916	0.00217653
ARID2	216.412	-0.102807	0.119211	0.750412	0.687148	0.774226
ARID3A	113.432	0.395144	0.174385	5.41603	0.0666691	0.119123
ARID3B	19.901	0.90498	0.400946	8.5365	0.0140063	0.0299852
ARID4A	251.033	-0.0812237	0.112074	0.728516	0.694712	0.78031
ARID4B	589.064	0.093221	0.0783013	5.68226	0.0583597	0.106086
ARID5A	71.5123	0.522174	0.209084	7.29688	0.0260317	0.052232
ARID5B	1382.38	-1.05341	0.0565449	420.996	3.81934e-92	1.00138e-90
ARIH1	652.242	0.171002	0.0724752	12.7438	0.00170895	0.00436366
ARIH2	431.138	0.0677827	0.0883866	2.38958	0.302768	0.422188
ARIH2OS	1.10863	-0.0669901	1.74957	0.102575	0.950005	0.962304
ARL1	1214.06	0.183559	0.0598587	11.7628	0.00279086	0.00683621
ARL10	50.6829	-0.23314	0.264018	6.69462	0.0351789	0.0681838
ARL13A	1.21355	2.01151	1.72251	2.02251	0.363762	0.486434
ARL13B	127.53	-0.819114	0.167539	26.8254	1.49599e-06	5.55013e-06
ARL14EP	223.07	-0.461467	0.124244	15.5527	0.000419548	0.00117724
ARL15	91.2388	0.0703412	0.181208	0.492787	0.781615	0.847519
ARL16	92.1081	-0.0913648	0.18139	0.540979	0.763006	0.834217
ARL17A	6.015	-0.307787	0.726362	1.07477	0.584273	0.690555
ARL2	66.2679	-0.293609	0.212766	4.19266	0.122906	0.201181
ARL2BP	599.492	-0.346935	0.0780167	35.8019	1.68159e-08	7.27337e-08
ARL3	190.054	0.370272	0.126495	11.4329	0.00329138	0.007947
ARL4A	14.3429	-0.0406082	0.454716	2.37997	0.304226	0.423824
ARL4C	198.606	1.78183	0.129828	211.704	1.06898e-46	1.49356e-45
ARL4D	35.554	-1.40272	0.296503	63.4515	1.66606e-14	1.01175e-13
ARL5A	665.56	0.289431	0.0814315	40.3949	1.69183e-09	7.85714e-09
ARL5B	716.307	1.59894	0.0829198	373.653	7.28182e-82	1.67572e-80
ARL6	122.042	0.454157	0.158687	8.22145	0.0163959	0.0346075
ARL6IP1	720.721	-0.36181	0.067753	35.912	1.59147e-08	6.89761e-08
ARL6IP4	164.5	-0.33352	0.143539	9.84958	0.00726424	0.016377
ARL6IP5	1289.42	0.352868	0.0539896	207.74	7.76038e-46	1.06721e-44
ARL6IP6	245.428	-0.641368	0.117819	35.6977	1.77147e-08	7.64874e-08
ARL8A	81.1506	0.726126	0.195303	15.8809	0.000356046	0.00100953
ARL8B	1340.18	1.05748	0.0599688	363.86	9.74641e-80	2.1561e-78
ARMC1	384.621	-0.175687	0.0933348	8.65104	0.0132267	0.0284597
ARMC10	27.0337	1.71678	0.368192	23.1662	9.32248e-06	3.20583e-05
ARMC2	9.84411	-0.174138	0.553712	1.57483	0.45502	0.575541
ARMC4	34.6031	-3.52113	0.406539	174.089	1.57424e-38	1.88275e-37
ARMC5	40.9982	0.164705	0.272028	0.379841	0.827025	0.87969
ARMC6	105.591	-0.0668489	0.17231	3.56775	0.167986	0.261079
ARMC7	24.8498	-0.0671945	0.335381	3.5556	0.16901	0.262429
ARMC8	197.261	-0.161931	0.125617	8.40098	0.0149882	0.0319311
ARMC9	619.144	-0.167543	0.0778803	36.1799	1.392e-08	6.05247e-08
ARMCX1	339.573	0.356172	0.0964078	23.8774	6.53258e-06	2.28771e-05
ARMCX2	397.431	-0.38153	0.089958	20.9066	2.88535e-05	9.36336e-05
ARMCX3	848.488	-0.0603432	0.062075	37.7561	6.32961e-09	2.81809e-08
ARMCX4	143.804	-0.277301	0.144114	5.39351	0.0674238	0.120226
ARMCX5	52.0581	-0.293695	0.247677	1.4097	0.494184	0.612926
ARMCX5.GPRASP2	8.66542	-0.470955	0.598643	0.717316	0.698613	0.783404
ARMCX6	23.9058	0.0275934	0.367775	0.215025	0.898065	0.927708
ARMH1	1.15521	-3.76461	1.78348	9.6292	0.00811045	0.0181609
ARMH3	146.769	0.337661	0.1607	9.13985	0.0103587	0.0227497
ARMH4	13.5562	0.708383	0.468833	2.456	0.292878	0.410631
ARMT1	666.141	0.463854	0.0790825	63.388	1.7198e-14	1.04268e-13
ARNT	264.186	0.362356	0.108974	11.4483	0.00326619	0.0078913
ARNT2	166.582	-0.877725	0.140982	46.9404	6.41254e-11	3.24911e-10
ARNTL	93.3449	0.626938	0.179832	12.6055	0.0018313	0.00465291
ARNTL2	678.517	0.959207	0.0789246	224.771	1.55477e-49	2.29983e-48
ARNTL2.AS1	1.45137	-1.5098	1.7549	2.15423	0.340576	0.462248
ARPC1A	736.811	1.20782	0.0713388	289.596	1.30336e-63	2.38032e-62
ARPC1B	1141.84	0.850235	0.0650967	234.067	1.48966e-51	2.27364e-50
ARPC2	2355.84	-0.0622489	0.0538626	1.47407	0.47853	0.598354
ARPC3	725.136	-0.0010634	0.0702497	4.35479	0.113336	0.188021
ARPC4	600.851	-0.166556	0.0755473	5.23405	0.0730197	0.128798
ARPC5	2654.96	0.14133	0.045081	9.96604	0.00685333	0.0155284
ARPC5L	333.793	0.949076	0.103903	129.745	6.70195e-29	6.50759e-28
ARPIN	72.9307	-1.45291	0.218157	62.9973	2.09076e-14	1.26347e-13
ARPP19	1591.88	0.143021	0.0539032	18.4472	9.86846e-05	0.000300503
ARR3	1.09545	-1.53263	1.88115	0.560834	0.755469	0.828953
ARRB1	83.2872	1.70413	0.220266	65.8441	5.03656e-15	3.12494e-14
ARRB2	12.6183	-0.0948332	0.502868	0.176222	0.915659	0.939866
ARRDC1	56.4011	0.549876	0.229507	6.26185	0.0436774	0.0825671
ARRDC1.AS1	9.35543	-0.542732	0.574915	1.80122	0.406322	0.529637
ARRDC2	43.2649	0.173002	0.27027	0.996336	0.607643	0.710296
ARRDC3	170.391	0.0738986	0.134959	71.4373	3.07325e-16	2.01619e-15
ARRDC3.AS1	1.83063	-0.78007	1.30584	0.458834	0.794997	0.8579
ARRDC4	432.596	-0.0364644	0.0913046	11.9333	0.00256285	0.00631307
ARSA	90.3949	-0.223132	0.175412	17.7483	0.000139958	0.000418382
ARSB	401.604	1.11365	0.0959173	138.736	7.47816e-31	7.63008e-30
ARSD	39.6507	-0.59433	0.267898	14.7545	0.000625318	0.00170976
ARSE	5.40651	-1.38371	0.814116	2.99486	0.223704	0.331168
ARSG	94.2919	2.26894	0.207689	133.83	8.69265e-30	8.60925e-29
ARSI	18.9808	1.0662	0.410717	7.40201	0.0246987	0.0498669
ARSJ	523.218	0.263099	0.0804907	10.9216	0.00425017	0.010029
ARSK	205.157	-0.124551	0.123513	13.8489	0.00098343	0.00261066
ARTN	1.41176	1.29409	1.35788	4.80967	0.0902805	0.155032
ARV1	106.755	-0.289098	0.167245	12.7164	0.00173251	0.00441775
ARVCF	13.1184	0.41378	0.46728	8.39224	0.0150539	0.032048
ASAH1	347.378	0.484277	0.100256	89.0717	4.55321e-20	3.39118e-19
ASAH2	1.69635	-0.242753	1.28392	0.330706	0.847594	0.893626
ASAH2B	19.8808	-0.448096	0.395409	2.05562	0.357789	0.480261
ASAP1	1658.53	-0.907477	0.0558537	270.799	1.57296e-59	2.68468e-58
ASAP1.IT2	2.31032	-0.28819	1.12295	0.14841	0.928481	0.94806
ASAP2	683.958	0.0615894	0.0744894	50.2792	1.20783e-11	6.36272e-11
ASAP3	34.1908	-0.838297	0.293099	29.0276	4.97432e-07	1.92925e-06
ASB1	709.009	1.41694	0.0736453	447.788	5.80972e-98	1.57893e-96
ASB13	19.384	0.0835464	0.399919	0.586012	0.746018	0.821431
ASB14	3.89796	0.0936672	0.867155	0.23156	0.890671	0.92302
ASB16	3.94313	0.0600686	0.852494	2.2899	0.31824	0.438945
ASB16.AS1	28.149	0.729437	0.34049	5.1162	0.0774516	0.135531
ASB3	45.7704	0.606037	0.269904	5.1806	0.0749976	0.131755
ASB5	1.10167	-1.16657	1.65389	1.36862	0.504439	0.621724
ASB6	130.125	0.0497692	0.153004	2.2079	0.331559	0.453112
ASB7	159.179	-0.0872271	0.148821	1.74643	0.417608	0.54031
ASB8	144.829	-0.459439	0.14622	17.6713	0.000145456	0.00043386
ASCC1	90.0037	-0.530115	0.189106	9.38433	0.00916681	0.0203363
ASCC2	174.044	-0.0728116	0.142071	6.66147	0.0357668	0.0691969
ASCC3	1615.83	-1.05009	0.0530424	483.615	9.64438e-106	2.7948e-104
ASF1A	157.682	-0.287997	0.150799	6.97863	0.0305218	0.0601455
ASF1B	18.1477	-3.72432	0.634542	53.2114	2.78796e-12	1.51539e-11
ASGR1	2.86283	1.18807	1.16254	3.33268	0.188937	0.288639
ASH1L	831.396	-0.110488	0.0680029	10.242	0.00597001	0.0137002
ASH1L.AS1	3.51898	-0.142359	0.885829	0.196536	0.906406	0.933292
ASH2L	138.347	-0.393506	0.149228	10.9979	0.00409103	0.00967966
ASIC1	9.54226	0.453705	0.553488	1.96294	0.374759	0.497782
ASIC3	2.6975	0.0901859	1.14644	2.38895	0.302863	0.422242
ASL	91.2379	-0.580713	0.190803	14.9696	0.000561559	0.00154538
ASNA1	199.489	0.216548	0.125568	4.07821	0.130145	0.210893
ASNS	2.67125	-1.17682	1.16915	1.36517	0.50531	0.622673
ASNSD1	258.48	-0.108027	0.110609	1.49129	0.474429	0.594275
ASPH	6715.72	-0.107198	0.0356617	22.4787	1.31464e-05	4.45588e-05
ASPHD1	49.6	1.60845	0.271896	37.3545	7.73687e-09	3.4231e-08
ASPHD2	7.52865	0.684364	0.650149	1.20219	0.54821	0.659947
ASPM	367.736	-5.31707	0.215054	1383.49	3.78627e-301	3.07577e-299
ASPN	24.8594	-3.08955	0.458878	74.2669	7.46706e-17	4.98452e-16
ASPSCR1	39.9544	-0.0578592	0.279695	0.149943	0.92777	0.947659
ASS1	263.303	1.01633	0.121463	122.904	2.04971e-27	1.91041e-26
ASTE1	26.4663	-0.747313	0.339859	5.06819	0.0793336	0.13831
ASTN2	11.5751	-0.108966	0.480006	7.79155	0.0203276	0.0419708
ASXL1	348.315	-0.221829	0.0978022	5.755	0.0562752	0.102724
ASXL2	774.685	0.844717	0.0713298	229.992	1.14233e-50	1.7223e-49
ATAD1	482.3	-0.0968813	0.0857383	1.31612	0.517854	0.634023
ATAD2	353.598	-1.31719	0.10548	160.904	1.14879e-35	1.29969e-34
ATAD2B	95.0268	-0.441736	0.185537	5.70169	0.0577956	0.10519
ATAD3A	79.2496	-0.45666	0.202898	5.21134	0.0738537	0.130113
ATAD3B	85.3731	-0.0142472	0.194213	0.155236	0.925318	0.946172
ATAD3C	0.87999	1.96272	2.10639	0.754734	0.685664	0.772847
ATAD5	50.6654	-1.25171	0.251605	34.7817	2.80062e-08	1.19227e-07
ATE1	364.159	0.575147	0.102927	51.6325	6.13979e-12	3.275e-11
ATE1.AS1	2.87358	-0.843146	1.03312	0.716018	0.699067	0.783617
ATF1	326.242	0.0383643	0.102857	3.83872	0.146701	0.233227
ATF2	592.813	0.0245417	0.0762614	8.27424	0.0159688	0.0338165
ATF3	15.5645	0.364641	0.489422	11.8322	0.00269575	0.00662085
ATF4	401.49	-0.141218	0.0992789	6.0365	0.0488867	0.0909461
ATF5	92.9068	0.00208207	0.18349	0.684213	0.710273	0.792414
ATF6	400.815	-1.00862	0.102884	99.6123	2.34136e-22	1.88347e-21
ATF6B	1.29066	1.41527	1.73697	0.822914	0.662684	0.754092
ATF7	184.484	0.448705	0.131492	12.5042	0.00192642	0.00487042
ATF7IP	393.657	-0.146086	0.0962416	2.84222	0.241446	0.35283
ATF7IP2	5.89536	-0.308248	0.692956	1.76581	0.413579	0.536358
ATG10	15.8733	-0.0477121	0.443358	2.71782	0.25694	0.37095
ATG101	146.499	0.645383	0.150263	23.6518	7.31279e-06	2.54416e-05
ATG12	751.396	0.602243	0.0729141	75.8608	3.36542e-17	2.26895e-16
ATG13	478.957	0.305848	0.0876239	52.2601	4.48599e-12	2.40754e-11
ATG14	246.38	0.197258	0.115527	5.82118	0.0544436	0.0997852
ATG16L1	160.935	0.647704	0.138381	22.3041	1.43455e-05	4.84243e-05
ATG16L2	33.5475	0.889333	0.307165	8.54568	0.0139421	0.029865
ATG2A	222.268	1.55396	0.127195	169.153	1.85751e-37	2.16919e-36
ATG2B	574.846	0.441845	0.0758772	40.2827	1.78943e-09	8.29487e-09
ATG3	315.148	-0.068487	0.104542	1.2211	0.543051	0.655861
ATG4A	86.4838	-0.421566	0.18525	6.96996	0.0306543	0.0603905
ATG4B	201.085	0.370035	0.127695	8.6822	0.0130222	0.0280429
ATG4C	67.4027	0.00668041	0.211719	0.0281498	0.986024	0.987884
ATG4D	22.6167	0.332974	0.361609	1.56394	0.457505	0.577922
ATG5	301.703	0.141096	0.104026	2.48792	0.288241	0.405699
ATG7	260.737	1.09873	0.123323	136.886	1.88607e-30	1.90867e-29
ATG9A	281.926	0.125605	0.109843	3.04992	0.21763	0.32382
ATIC	398.682	0.0277262	0.0934995	18.2528	0.000108755	0.000329411
ATL1	187.149	1.08481	0.137437	79.5372	5.35449e-18	3.71614e-17
ATL2	274.719	0.335821	0.120308	9.23776	0.00986384	0.0217593
ATL3	1767.36	0.245011	0.056887	40.0345	2.02594e-09	9.36203e-09
ATM	1424.56	0.665585	0.0539512	163.477	3.17189e-36	3.63277e-35
ATMIN	482.097	0.0452055	0.0825128	10.4593	0.00535551	0.0124321
ATN1	535.821	-0.304533	0.0875532	12.5093	0.00192152	0.00486136
ATOH8	16.986	-3.97914	1.14783	18.888	7.91643e-05	0.000244432
ATOX1	204.094	0.24104	0.124656	3.7612	0.152499	0.240689
ATP10A	38.7093	-4.08473	0.436149	213.863	3.63247e-47	5.11851e-46
ATP10D	548.32	-0.886067	0.0840894	286.495	6.14441e-63	1.10451e-61
ATP11A	156.78	0.784788	0.146516	30.1324	2.86312e-07	1.12959e-06
ATP11B	921.44	0.436752	0.0695438	50.2289	1.23858e-11	6.51779e-11
ATP11C	539.817	-0.377043	0.0807624	22.1626	1.53974e-05	5.18456e-05
ATP13A1	216.056	0.00969192	0.129299	0.0396967	0.980347	0.983722
ATP13A2	115.503	0.710423	0.173844	21.6482	1.99142e-05	6.58903e-05
ATP13A3	7660.67	1.26085	0.0383244	1909.53	0	0
ATP1A1	1165.35	0.484633	0.0629137	74.8332	5.62574e-17	3.77061e-16
ATP1A1.AS1	3.12001	-0.88939	0.952753	5.44247	0.0657934	0.117785
ATP1B1	69.2046	-0.928171	0.205542	48.1043	3.58338e-11	1.83818e-10
ATP1B3	1628.93	0.557085	0.0502492	138.836	7.1153e-31	7.26484e-30
ATP2A1	3.09121	-0.0917401	0.973711	0.0155648	0.992248	0.993183
ATP2A1.AS1	0.855342	-1.03019	1.96719	0.204406	0.902846	0.931029
ATP2A2	3673.88	-0.00907433	0.0434214	112.36	3.99311e-25	3.4898e-24
ATP2A3	76.9929	5.6019	0.436891	347.622	3.27246e-76	6.94977e-75
ATP2B1	3731.42	1.03516	0.0435145	824.223	1.0524e-179	4.98246e-178
ATP2B1.AS1	33.7095	0.707354	0.311327	7.6506	0.0218118	0.0446386
ATP2B4	5103.67	-0.8149	0.0388036	514.211	2.18994e-112	6.61702e-111
ATP2C1	1681.79	-0.340184	0.0517986	43.5091	3.56547e-10	1.73047e-09
ATP2C2	5.6501	-0.328809	0.722077	1.77977	0.410703	0.533651
ATP2C2.AS1	5.339	-0.529463	0.755158	0.606418	0.738445	0.815702
ATP5F1A	1757.05	-0.131656	0.0482138	7.50396	0.0234712	0.0475956
ATP5F1B	1930.45	0.0865134	0.0457201	13.1785	0.00137504	0.00356679
ATP5F1C	666.737	-0.31202	0.0742518	19.8173	4.97428e-05	0.000157402
ATP5F1D	110.615	-0.145312	0.173617	0.802907	0.669347	0.759407
ATP5F1E	142.91	0.347896	0.145123	5.85015	0.0536607	0.0985813
ATP5IF1	363.26	-0.141276	0.103082	10.7806	0.00456071	0.0107125
ATP5MC1	112.36	-0.23281	0.163514	6.41491	0.0404594	0.0773295
ATP5MC2	280.243	-0.464466	0.108363	18.9373	7.72361e-05	0.000239057
ATP5MC3	1021.76	0.184572	0.0597467	9.83872	0.0073038	0.0164637
ATP5MD	414.658	0.110459	0.093687	4.36408	0.112811	0.187296
ATP5ME	196.293	0.436278	0.13081	14.3908	0.000750041	0.00202656
ATP5MF	200.898	-0.109851	0.124878	1.39014	0.499039	0.617025
ATP5MG	524.981	0.35746	0.0833361	19.0971	7.13046e-05	0.000221621
ATP5MGL	7.15026	-0.184785	0.640012	0.109776	0.946591	0.959696
ATP5MPL	256.489	0.132294	0.111451	2.05064	0.358681	0.481111
ATP5PB	510.834	-0.280124	0.0827222	11.8397	0.00268567	0.00660029
ATP5PD	408.418	0.34354	0.0930863	13.6777	0.00107132	0.00283083
ATP5PF	489.817	0.095882	0.0795003	1.46618	0.480423	0.600216
ATP5PO	346.586	-0.0419893	0.099332	0.283019	0.868047	0.90729
ATP5S	38.0716	-0.692552	0.295355	5.80378	0.0549195	0.100582
ATP6AP1	471.766	0.479104	0.0858447	34.3546	3.4673e-08	1.46935e-07
ATP6AP1L	4.87062	-0.928668	0.823103	2.58052	0.275199	0.391457
ATP6AP2	1492.18	0.72928	0.053527	186.66	2.93313e-41	3.72682e-40
ATP6V0A1	341.491	1.52861	0.10363	226.552	6.38011e-50	9.51321e-49
ATP6V0A2	197.694	0.296485	0.1327	11.1752	0.00374399	0.00893532
ATP6V0B	561.598	1.21111	0.090527	192.961	1.25633e-42	1.63974e-41
ATP6V0C	953.359	0.805756	0.0701916	133.309	1.12785e-29	1.11332e-28
ATP6V0CP3	0.879512	-1.25531	1.86679	0.55519	0.757604	0.830509
ATP6V0D1	550.286	0.901674	0.0808023	135.091	4.62671e-30	4.63482e-29
ATP6V0E1	1238.12	0.152043	0.06155	26.4214	1.83088e-06	6.72045e-06
ATP6V0E2	21.4558	-1.90299	0.424684	32.4915	8.80165e-08	3.61851e-07
ATP6V0E2.AS1	1.48782	-1.47765	1.379	3.95126	0.138674	0.222555
ATP6V1A	957.263	0.263702	0.0651162	20.7313	3.14962e-05	0.000101832
ATP6V1B1	1.74215	0.716757	1.21313	1.59005	0.451569	0.572052
ATP6V1B1.AS1	1.05904	1.27419	1.83425	0.938556	0.625454	0.724312
ATP6V1B2	553.756	1.35299	0.0817598	280.804	1.05739e-61	1.85367e-60
ATP6V1C1	1247.86	1.41543	0.0625139	648.493	1.51923e-141	5.63215e-140
ATP6V1C2	6.79844	0.526278	0.681789	2.65967	0.264521	0.379609
ATP6V1D	726.256	0.495718	0.070517	53.0895	2.96314e-12	1.60943e-11
ATP6V1E1	606.776	1.10006	0.0774797	226.642	6.09981e-50	9.10439e-49
ATP6V1E2	11.5048	0.0942661	0.511092	0.344438	0.841795	0.890234
ATP6V1F	426.454	1.31297	0.0953571	194.347	6.28169e-43	8.22038e-42
ATP6V1FNB	3.40599	2.51094	1.10243	5.84553	0.0537847	0.0987724
ATP6V1G1	1191.17	1.39678	0.0612532	548.82	6.68742e-120	2.1288e-118
ATP6V1H	616.5	0.655179	0.0739333	112.604	3.5354e-25	3.09342e-24
ATP7A	446.148	1.00636	0.0904305	138.322	9.20122e-31	9.37528e-30
ATP7B	16.0953	-0.767262	0.436189	3.61854	0.163774	0.255446
ATP8A1	7.24606	1.84277	0.655416	11.3433	0.00344212	0.00827199
ATP8B1	742.68	-4.69757	0.124277	3094.46	0	0
ATP8B2	860.708	0.24865	0.0646248	30.0033	3.05394e-07	1.20201e-06
ATP8B3	5.36774	-1.8091	0.818012	6.44198	0.0399156	0.0764376
ATP8B4	2.22621	-0.400878	1.13909	0.604417	0.739184	0.816397
ATP8B5P	8.82715	-0.133256	0.617508	0.833947	0.659039	0.751267
ATP9A	314.168	-0.105543	0.103952	3.20282	0.201612	0.304497
ATP9B	54.3166	-0.0561297	0.245379	0.180867	0.913535	0.938082
ATPAF1	144.576	-0.887692	0.162336	34.9115	2.62459e-08	1.12022e-07
ATPAF2	48.6574	0.527932	0.251656	4.89206	0.0866366	0.149378
ATR	425.122	-0.273227	0.0986627	12.7418	0.00171062	0.00436643
ATRAID	239.14	-0.434379	0.114469	16.0939	0.000320069	0.000913272
ATRN	655.076	0.0661165	0.074667	6.52996	0.0381976	0.0734746
ATRX	1644.61	-0.146025	0.0492647	10.3694	0.00560163	0.0129367
ATXN1	259.173	-1.41195	0.119259	231.189	6.27867e-51	9.51465e-50
ATXN10	834.299	-0.130776	0.0672827	36.2362	1.35337e-08	5.89143e-08
ATXN1L	199.597	-0.144609	0.137547	1.24353	0.536997	0.651088
ATXN2	447.43	-0.182662	0.0888763	4.64629	0.0979652	0.166061
ATXN2L	423.329	0.151049	0.0967083	28.2304	7.41063e-07	2.83277e-06
ATXN3	215.44	0.760964	0.121236	46.6198	7.52747e-11	3.79462e-10
ATXN7	263.525	0.125663	0.11036	1.30278	0.521321	0.63732
ATXN7L1	36.1722	-1.15291	0.29899	25.1605	3.43921e-06	1.23228e-05
ATXN7L2	24.1554	-1.26038	0.362031	18.4457	9.87591e-05	0.000300666
ATXN7L3	274.499	0.494982	0.113453	24.0348	6.03808e-06	2.12053e-05
ATXN7L3B	458.128	0.000398959	0.0831593	0.363264	0.833908	0.884964
AUH	61.7318	0.1541	0.227638	4.17869	0.123768	0.202169
AUNIP	6.77153	-3.21488	0.982055	14.5285	0.000700115	0.00190307
AUP1	255.375	0.407432	0.115729	21.4734	2.17323e-05	7.16507e-05
AURKA	224.376	-1.525	0.135437	136.209	2.64621e-30	2.66702e-29
AURKAIP1	187.403	0.299087	0.125719	6.34482	0.0419025	0.0797188
AURKAP1	5.95435	-0.882323	0.83937	3.07932	0.214454	0.32012
AURKB	19.6798	-3.59637	0.572115	67.6131	2.07973e-15	1.31507e-14
AURKC	2.41532	1.03006	1.12394	1.12616	0.569452	0.678161
AUTS2	2.45619	4.74714	1.50747	11.1589	0.00377473	0.00900001
AVEN	137.462	-0.111869	0.147124	2.42045	0.29813	0.416776
AVIL	5.15798	-0.950061	0.772644	1.65993	0.436063	0.557924
AVL9	559.012	0.848889	0.079071	140.702	2.79904e-31	2.87366e-30
AVPI1	39.8295	-0.573146	0.271299	5.51119	0.0635712	0.114192
AXDND1	7.41615	0.665892	0.66221	1.25682	0.533439	0.647726
AXIN1	98.0007	0.472567	0.181364	9.56627	0.00836973	0.0186992
AXIN2	4.66843	0.143985	0.775375	0.167464	0.919678	0.942631
AXL	1818.13	-1.86395	0.0514854	1581.8	0	0
AZI2	496.844	-0.411333	0.0847078	48.5594	2.85409e-11	1.47118e-10
AZIN1	1010.66	-1.3703	0.0636814	549.814	4.06798e-120	1.29774e-118
AZIN1.AS1	0.950775	-1.55212	1.82025	0.835409	0.658557	0.750948
AZIN2	8.20565	0.492697	0.646081	1.00873	0.60389	0.707441
B2M	215.868	-0.350897	0.123266	11.1117	0.00386472	0.00918953
B3GALNT1	28.9447	-3.24418	0.438988	87.2063	1.15714e-19	8.53278e-19
B3GALNT2	287.272	-0.376017	0.105406	12.9336	0.00155418	0.00399731
B3GALT1	2.63518	3.57595	1.31044	12.5891	0.00184634	0.0046847
B3GALT2	6.64994	-4.39424	1.10035	44.7361	1.93058e-10	9.51594e-10
B3GALT6	155.521	0.233976	0.140996	2.88576	0.236247	0.346561
B3GAT3	96.1833	0.768575	0.179038	19.0427	7.32724e-05	0.000227405
B3GLCT	89.4979	-1.0381	0.188929	40.8819	1.32618e-09	6.21532e-09
B3GNT10	21.6961	-0.095798	0.375243	0.328613	0.848482	0.894006
B3GNT2	220.456	1.0373	0.128803	65.4813	6.03829e-15	3.73089e-14
B3GNT4	1.01608	-0.354499	1.58442	0.462682	0.793469	0.856686
B3GNT5	55.243	2.88984	0.282879	120.463	6.94685e-27	6.3748e-26
B3GNT8	3.3098	0.514256	0.99611	0.560539	0.75558	0.828953
B3GNT9	91.6614	-0.293871	0.185207	2.64675	0.266236	0.381517
B3GNTL1	4.40595	1.70262	0.8516	4.35509	0.11332	0.188014
B4GALNT1	20.1107	0.347795	0.359876	22.0697	1.61293e-05	5.41261e-05
B4GALNT4	9.07731	-0.362805	0.612013	0.411761	0.81393	0.870586
B4GALT1	1335.46	0.552534	0.0530454	111.431	6.35471e-25	5.51484e-24
B4GALT1.AS1	9.58821	1.38159	0.553	9.12955	0.0104122	0.0228604
B4GALT2	144.83	-0.794472	0.157324	35.5222	1.93401e-08	8.32397e-08
B4GALT3	138.905	0.709818	0.152769	30.072	2.95084e-07	1.16327e-06
B4GALT4	144.595	-1.07025	0.1552	75.9624	3.19863e-17	2.15944e-16
B4GALT5	441.316	0.29969	0.0842737	12.7113	0.00173692	0.00442789
B4GALT6	0.908304	0.626144	1.97095	0.263675	0.876484	0.912835
B4GALT7	86.4131	0.307586	0.182916	4.67622	0.0965096	0.164061
B4GAT1	101.391	0.108852	0.179112	4.15064	0.125516	0.204418
B9D1	34.9491	-0.722818	0.321639	6.61785	0.0365555	0.0705759
B9D2	11.1163	0.659742	0.525177	1.65066	0.43809	0.559842
BAALC	149.28	2.40715	0.181546	240.176	7.02211e-53	1.09195e-51
BABAM1	154.72	-0.121346	0.142775	1.92405	0.382118	0.505035
BABAM2	53.8734	-1.28129	0.249828	31.8597	1.2071e-07	4.90562e-07
BACE1	374.965	-1.07113	0.0947085	201.37	1.87491e-44	2.52011e-43
BACE1.AS	2.84134	-0.42369	1.12163	0.716727	0.698819	0.783516
BACE2	2.33568	0.681927	1.06854	2.74455	0.253529	0.366845
BACH1	1110.76	0.776756	0.0694739	245.406	5.13886e-54	8.12706e-53
BACH2	1.73013	2.08232	1.73271	3.8802	0.14369	0.229399
BAD	102.431	0.15004	0.171372	3.92093	0.140793	0.225542
BAG1	82.5816	0.961962	0.199478	23.6355	7.37255e-06	2.56315e-05
BAG2	660.805	-1.57885	0.0884141	355.184	7.45997e-78	1.62372e-76
BAG3	328.811	-0.0485748	0.0979343	2.75415	0.252316	0.365516
BAG4	394.679	0.0491835	0.0919215	0.673527	0.714078	0.795644
BAG5	344.426	0.0637983	0.0968907	3.03563	0.21919	0.325783
BAHCC1	48.6963	-0.75853	0.286129	7.75011	0.0207532	0.0427427
BAHD1	118.696	-0.0482997	0.165445	3.85956	0.14518	0.231199
BAIAP2	104.541	0.737978	0.181034	16.8057	0.000224227	0.000651682
BAIAP2.DT	56.5411	0.283672	0.223903	5.70526	0.0576923	0.105027
BAIAP2L1	30.6132	-1.55571	0.339721	24.6042	4.54225e-06	1.61235e-05
BAIAP2L2	1.59006	1.66338	1.58197	1.18517	0.552895	0.664565
BAIAP3	1.33679	-2.48472	1.66607	2.87229	0.237843	0.348524
BAK1	52.1909	0.723967	0.248107	8.94389	0.0114251	0.0248931
BAMBI	9.24998	-2.90257	0.691942	45.266	1.48119e-10	7.34712e-10
BANF1	144.733	-0.173828	0.146758	1.75565	0.415686	0.538526
BANP	54.8852	0.450098	0.23763	3.83754	0.146788	0.233291
BAP1	178.144	-0.178222	0.132787	1.91864	0.383154	0.506128
BARD1	62.383	-2.82371	0.280664	170.6	9.00763e-38	1.06023e-36
BASP1	807.867	0.576744	0.0704236	220.857	1.10006e-48	1.60171e-47
BASP1.AS1	0.953712	2.15455	1.97083	1.05724	0.589417	0.694868
BATF2	4.16014	1.40245	0.983706	2.60672	0.271618	0.387549
BATF3	5.21502	-0.992869	0.804994	1.95576	0.376108	0.499305
BAX	154.563	-0.790351	0.144318	31.1668	1.70692e-07	6.85628e-07
BAZ1A	727.26	-0.109784	0.0742519	22.948	1.0397e-05	3.55396e-05
BAZ1B	762.554	0.216779	0.0707028	22.8932	1.0686e-05	3.65105e-05
BAZ2A	570.331	0.337387	0.0802426	35.1398	2.34151e-08	1.00372e-07
BAZ2B	275.857	0.30633	0.113727	17.698	0.000143528	0.00042845
BBC3	25.5091	-0.749769	0.346031	7.75108	0.0207431	0.0427398
BBIP1	97.4188	0.468911	0.177648	7.46611	0.0239196	0.0484388
BBOF1	25.1204	-1.69839	0.368986	28.6353	6.05232e-07	2.33153e-06
BBS1	60.1677	-1.44488	0.24408	46.1972	9.29836e-11	4.66518e-10
BBS10	271.042	0.265777	0.116749	7.54405	0.0230054	0.046796
BBS12	57.3665	0.640712	0.238374	19.7164	5.23173e-05	0.000164987
BBS2	317.456	0.929784	0.105787	94.5208	2.98583e-21	2.31909e-20
BBS4	97.724	-0.247257	0.185024	4.09163	0.129275	0.209712
BBS5	35.2781	-1.25736	0.315436	16.4613	0.000266361	0.000767538
BBS7	209.628	-0.278846	0.122666	16.4819	0.000263632	0.000760114
BBS9	88.4827	0.357072	0.188367	3.6958	0.157568	0.247063
BBX	1008.5	-0.0991612	0.0592016	16.7781	0.000227337	0.000660207
BCAM	5.72536	-2.11882	0.821941	16.6659	0.000240463	0.000695742
BCAP29	1911.3	0.941755	0.0530379	538.612	1.10117e-117	3.42469e-116
BCAP31	483.313	0.477431	0.0839521	44.1033	2.64903e-10	1.29541e-09
BCAR1	341.306	-0.826478	0.114411	52.306	4.38427e-12	2.35464e-11
BCAR3	413.561	-0.0347099	0.0915847	1.4858	0.475731	0.595506
BCAS2	219.293	0.235766	0.123542	6.69121	0.0352388	0.0682821
BCAS3	59.6771	0.0499457	0.219961	1.12095	0.570938	0.679277
BCAS4	57.4068	0.107665	0.230854	3.2011	0.201786	0.304698
BCAT1	1296.66	-0.530693	0.0629269	152.932	6.18219e-34	6.71816e-33
BCAT2	68.8539	-0.292741	0.212651	4.15362	0.12533	0.204226
BCCIP	332.362	-0.0749781	0.102377	4.84565	0.0886708	0.15255
BCDIN3D	16.0887	0.396271	0.412271	1.84897	0.396736	0.519774
BCDIN3D.AS1	2.66993	-0.905127	1.0947	2.65858	0.264665	0.379742
BCKDHA	55.5909	0.0566512	0.252209	2.37413	0.305116	0.424821
BCKDHB	96.1306	-1.85651	0.18987	143.683	6.30298e-32	6.57083e-31
BCKDK	231.213	0.076271	0.121451	6.80974	0.0332111	0.0647558
BCL10	640.918	1.33653	0.0768644	319.507	4.16858e-70	8.25167e-69
BCL11A	3.16825	-2.03262	1.03647	9.50179	0.00864394	0.0192568
BCL11B	1.54781	4.19287	1.63195	7.11876	0.0284564	0.0565145
BCL2	11.6056	-0.367924	0.526525	0.522678	0.77002	0.839416
BCL2A1	42.7465	4.51899	0.692802	222.79	4.18514e-49	6.14179e-48
BCL2L1	281.001	0.43283	0.10326	22.0525	1.6269e-05	5.45454e-05
BCL2L10	1.48661	-0.0148135	1.32409	0.432505	0.805532	0.865374
BCL2L11	17.7006	1.05223	0.410018	8.88188	0.0117849	0.0255907
BCL2L12	37.4624	-0.027968	0.29171	0.363639	0.833752	0.884964
BCL2L13	505.159	0.283749	0.0833396	13.6558	0.00108312	0.00286099
BCL2L15	1.27803	-0.899276	1.58041	0.738163	0.691369	0.777686
BCL2L2	349.605	-0.0841285	0.101661	7.41142	0.0245827	0.0496464
BCL3	45.1713	-0.0968145	0.257062	0.656083	0.720333	0.800753
BCL6	162.977	-0.383514	0.150982	11.7442	0.00281696	0.00689445
BCL7A	38.4892	0.635368	0.289486	8.35024	0.0153733	0.0326647
BCL7B	191.683	0.0481231	0.136265	0.937144	0.625896	0.724654
BCL7C	51.4028	-0.229746	0.252236	1.37107	0.50382	0.621207
BCL9	57.8776	-0.145879	0.226399	1.30006	0.52203	0.637978
BCL9L	384.437	-0.0275462	0.093422	7.17692	0.0276409	0.0550681
BCLAF1	1118.3	-0.0359228	0.0578167	0.768286	0.681034	0.768969
BCLAF3	104.21	-0.566244	0.170485	15.8224	0.000366609	0.00103711
BCO2	2.74553	-2.5201	1.27993	4.40716	0.110407	0.183901
BCOR	120.031	0.267204	0.161135	4.80109	0.0906686	0.155543
BCORL1	61.6948	0.226236	0.236162	3.73829	0.154256	0.242868
BCR	199.319	0.503189	0.12915	26.2311	2.01366e-06	7.3641e-06
BCS1L	53.2436	-0.657443	0.253481	7.16429	0.027816	0.0553712
BCYRN1	1.0392	-0.950123	1.65938	1.43733	0.487401	0.606589
BDH2	154.026	-1.09623	0.154094	54.9351	1.17759e-12	6.5664e-12
BDKRB1	194.621	0.919269	0.133418	56.6525	4.98969e-13	2.82041e-12
BDKRB2	915.8	1.35094	0.0656483	522.184	4.06641e-114	1.23622e-112
BDNF	242.615	-3.68575	0.162154	1284.52	1.17237e-279	8.62796e-278
BDNF.AS	10.2983	-1.36045	0.558125	10.2958	0.00581158	0.0133863
BDP1	1.21949	2.24692	1.65555	2.3051	0.315831	0.436027
BECN1	167.205	-0.308046	0.136979	7.0809	0.0290002	0.0574593
BEGAIN	1.68647	2.32258	1.49234	2.83416	0.242421	0.354011
BEND3	27.4666	0.549069	0.352043	10.2498	0.00594687	0.0136535
BEND3P3	20.9563	-0.961158	0.392673	6.54008	0.0380049	0.0731272
BEND6	165.259	0.447626	0.133068	12.3249	0.00210705	0.00528488
BEND7	8.05654	-0.263056	0.605781	7.75414	0.0207114	0.0426862
BEST1	9.91305	0.297906	0.549161	0.426742	0.807856	0.867181
BEST3	8.19841	4.8103	1.09786	31.6743	1.32441e-07	5.35893e-07
BEST4	1.45974	1.27051	1.49433	0.816799	0.664713	0.755765
BET1	513.803	0.976312	0.0895136	131.151	3.31887e-29	3.24594e-28
BET1L	259.573	0.114256	0.109648	2.59273	0.273524	0.389558
BEX1	127.258	-0.388033	0.155664	6.61803	0.0365522	0.0705759
BEX3	1319.85	1.24659	0.0556568	547.386	1.37008e-119	4.33352e-118
BEX4	149.466	0.576295	0.144747	19.6308	5.46039e-05	0.000171543
BFSP1	28.9225	1.05426	0.330431	11.4703	0.00323034	0.0078123
BGN	307.155	0.0876384	0.104025	31.1465	1.72431e-07	6.91865e-07
BHLHE40	703.156	4.61297	0.122868	2253.71	0	0
BHLHE40.AS1	3.14419	0.763344	1.08256	0.562581	0.754809	0.828545
BHLHE41	95.8365	1.46398	0.185885	63.7582	1.42915e-14	8.70369e-14
BHMT	1.02841	1.60106	1.70507	1.02603	0.598689	0.702677
BHMT2	97.1927	0.994672	0.188345	28.6415	6.03366e-07	2.32495e-06
BICC1	572.107	-1.50639	0.0867714	353.531	1.70477e-77	3.69432e-76
BICD1	395.379	1.17057	0.0922225	164.308	2.09409e-36	2.40763e-35
BICD2	520.167	0.0838035	0.0810524	19.7355	5.18186e-05	0.000163449
BICDL1	1.14725	-1.93678	1.7424	1.40878	0.494411	0.613106
BICRA	34.7073	-0.512771	0.290736	4.17944	0.123722	0.202116
BICRAL	97.8709	-0.446146	0.176774	6.49479	0.0388753	0.0746667
BID	276.543	0.437093	0.10656	19.6912	5.29791e-05	0.000166862
BIN1	74.1927	-0.42508	0.209962	10.6121	0.00496155	0.0115863
BIN3	93.8456	-0.0113849	0.181005	0.888776	0.641217	0.736485
BIN3.IT1	1.12202	-0.253113	1.72205	0.806026	0.668303	0.758571
BIRC2	971.362	0.0707464	0.061726	10.5009	0.00524503	0.0121851
BIRC3	28.962	-1.1648	0.35065	18.0177	0.000122322	0.000368105
BIRC5	116.449	-4.41057	0.298837	392.099	7.19085e-86	1.74387e-84
BIRC6	1414.06	0.0424409	0.0627915	3.91838	0.140972	0.225732
BISPR	1.20367	-1.22729	1.55278	6.10331	0.0472807	0.0884243
BIVM	333.428	-0.00728679	0.102009	18.6669	8.84185e-05	0.000271296
BLCAP	347.57	-0.413455	0.0935139	44.2999	2.40104e-10	1.17724e-09
BLID	2.20612	-0.660364	1.30144	1.16487	0.558536	0.669379
BLK	0.898223	0.524696	2.13264	2.9802	0.22535	0.333107
BLM	20.9509	-3.20909	0.532075	49.7927	1.5405e-11	8.05525e-11
BLMH	97.7934	-0.73197	0.176744	25.5637	2.81136e-06	1.01737e-05
BLOC1S1	43.4301	-0.568459	0.266286	5.35524	0.0687264	0.122261
BLOC1S2	311.967	0.371782	0.0984716	18.5112	9.5575e-05	0.000291689
BLOC1S3	41.9588	0.502089	0.270633	4.34708	0.113774	0.188537
BLOC1S4	132.925	0.989082	0.155324	45.2186	1.51672e-10	7.51335e-10
BLOC1S6	1067.61	0.917385	0.061028	251.065	3.03342e-55	4.86986e-54
BLVRA	91.9105	-0.319053	0.178576	12.4947	0.00193562	0.00489204
BLVRB	42.8213	-0.00555411	0.26551	0.139293	0.932723	0.950808
BLZF1	449.297	0.435231	0.0905174	47.2903	5.38309e-11	2.7387e-10
BMF	4.35681	2.30569	0.951714	7.26578	0.0264396	0.0529934
BMI1	10.1987	0.0882231	0.554268	0.83245	0.659532	0.751714
BMP1	169.092	-0.0860358	0.133818	22.5464	1.2709e-05	4.31254e-05
BMP2	2032.74	6.0201	0.125163	6780.19	0	0
BMP2K	302.323	0.63458	0.110833	38.6638	4.02042e-09	1.81885e-08
BMP3	5.35997	-0.67538	0.826829	1.39195	0.498587	0.616742
BMP4	19.2881	-0.664103	0.381593	20.8429	2.97861e-05	9.65337e-05
BMP6	3.61753	5.31985	1.42905	16.4664	0.00026569	0.000765751
BMP8A	2.15626	-0.896468	1.31264	0.45729	0.795611	0.858272
BMPER	306.733	-0.00447306	0.102054	19.7599	5.11905e-05	0.000161605
BMPR1A	179.695	0.288306	0.156584	13.1595	0.0013882	0.00359591
BMPR2	1861.41	-0.10979	0.0582236	10.4171	0.00546967	0.0126635
BMS1	296.553	0.0634699	0.108177	0.976684	0.613643	0.715035
BMS1P1	10.2772	-0.378459	0.549243	0.681259	0.711323	0.793287
BMS1P14	1.78335	-1.61348	1.44431	1.79321	0.407952	0.531518
BMS1P2	5.25753	-1.0764	0.766726	2.53519	0.281508	0.398773
BMS1P20	63.5001	0.238309	0.238757	1.02387	0.599335	0.703213
BMS1P4	16.4526	-0.631748	0.456571	4.6504	0.0977641	0.165795
BMT2	321.406	-0.0257132	0.101663	15.4358	0.000444799	0.00124457
BNC1	194.218	1.81937	0.15238	280.868	1.02421e-61	1.79762e-60
BNC2	399.245	0.072675	0.0889496	3.71842	0.155796	0.244723
BNC2.AS1	3.2882	-1.06259	1.00411	2.53126	0.282062	0.399426
BNIP1	31.5758	-0.131145	0.302446	1.31594	0.517902	0.634023
BNIP2	1031.81	0.374776	0.0591546	50.9561	8.61019e-12	4.56977e-11
BNIP3	731.984	0.875288	0.151717	45.8355	1.11418e-10	5.56006e-10
BNIP3L	2987.54	1.25334	0.0472309	849.157	4.05406e-185	1.98903e-183
BNIPL	1.07635	1.01017	1.75754	1.09361	0.578795	0.686263
BOC	40.8986	0.305302	0.272094	1.44864	0.484654	0.604081
BOD1	216.465	-0.269578	0.122716	5.67801	0.0584837	0.10627
BOD1L1	788.027	-0.047392	0.0693256	25.4594	2.96181e-06	1.06792e-05
BOD1L2	1.56364	-1.58183	1.43154	1.37839	0.501979	0.619442
BOK	106.251	-0.463768	0.171103	7.90678	0.0191896	0.0398871
BOLA1	14.0163	-0.0147473	0.456496	0.00679952	0.996606	0.996827
BOLA3	173.484	-0.0777306	0.135479	0.420051	0.810564	0.868707
BOLA3.AS1	42.8519	0.376233	0.268595	3.16008	0.205967	0.309603
BOP1	98.3187	-0.459315	0.177947	7.34196	0.0254515	0.0512407
BORA	38.5236	-1.01653	0.294354	13.5623	0.00113495	0.00298887
BORCS5	78.085	1.04622	0.212915	25.6441	2.70053e-06	9.78697e-06
BORCS6	16.7215	0.348807	0.42417	2.58899	0.274036	0.390137
BORCS7	294.518	0.471099	0.104872	20.5301	3.48289e-05	0.000112046
BORCS8	37.6063	0.298977	0.278752	1.15469	0.561387	0.671857
BPGM	212.259	1.52202	0.131094	137.732	1.23545e-30	1.25624e-29
BPHL	30.9603	-0.540603	0.321442	6.32968	0.0422209	0.080222
BPNT1	194.829	0.112314	0.125516	0.807759	0.667725	0.758319
BPTF	846.513	0.37091	0.0629899	37.5354	7.06781e-09	3.13455e-08
BRAF	3503.75	0.202233	0.0433354	123.61	1.44049e-27	1.35106e-26
BRAP	176.374	0.346529	0.137372	6.46177	0.0395226	0.0757729
BRAT1	115.226	0.51379	0.173439	10.3182	0.00574685	0.0132454
BRCA1	75.3537	-2.15796	0.236423	100.51	1.49464e-22	1.20954e-21
BRCA2	91.8888	-1.27562	0.206034	40.214	1.85203e-09	8.57168e-09
BRCC3	180.17	0.331329	0.134685	6.12454	0.0467815	0.0876659
BRD1	179.341	-0.149071	0.13611	1.51942	0.467803	0.587609
BRD2	3.18091	1.18937	1.08781	1.31045	0.519325	0.635467
BRD3	166.393	-0.305001	0.138975	5.76623	0.0559603	0.102305
BRD3OS	151.981	-0.327622	0.144274	5.29987	0.0706556	0.125237
BRD4	348.857	0.270709	0.101859	15.2138	0.000497008	0.00137743
BRD7	114.543	-0.112365	0.162778	2.71258	0.257614	0.371671
BRD7P3	3.14487	0.900698	0.932699	1.49882	0.472646	0.592491
BRD8	215.141	0.02471	0.126515	4.06142	0.131242	0.212463
BRD9	126.287	-0.464039	0.156459	10.5138	0.0052115	0.0121167
BRF1	66.8218	0.0745202	0.213439	2.68032	0.261804	0.376582
BRF2	38.0066	-0.481609	0.281665	3.29322	0.192703	0.293666
BRI3	867.938	0.275152	0.065158	30.9616	1.89137e-07	7.56243e-07
BRI3BP	6.24047	-0.149304	0.673792	1.31789	0.517397	0.633733
BRICD5	1.15526	-1.29785	1.57377	1.01473	0.60208	0.705877
BRIP1	87.0091	-4.63191	0.353993	358.816	1.21357e-78	2.66483e-77
BRIX1	324.762	-0.410321	0.0988649	17.7238	0.000141686	0.000423293
BRK1	799.923	0.476247	0.0650619	54.6769	1.33989e-12	7.43793e-12
BRMS1	118.328	0.534319	0.162923	12.0992	0.00235883	0.00585023
BRMS1L	131.973	-0.36089	0.149794	6.97562	0.0305677	0.0602279
BROX	1081.86	0.30727	0.0625383	43.0986	4.37776e-10	2.11161e-09
BRPF1	67.6572	0.296353	0.213145	2.86329	0.238915	0.349854
BRPF3	399.367	0.49226	0.0987417	67.8903	1.8105e-15	1.14825e-14
BRSK1	16.5343	-0.326075	0.439323	0.815601	0.665111	0.756102
BRSK2	2.29016	2.15875	1.21611	4.06157	0.131233	0.212463
BRWD1	663.611	0.468709	0.0736488	59.0546	1.50124e-13	8.74506e-13
BRWD3	227.208	0.339788	0.120849	7.91877	0.0190748	0.0396818
BSCL2	4.11698	-0.555479	0.903545	0.669991	0.715341	0.796694
BSDC1	340.727	0.54544	0.0992529	30.3521	2.56527e-07	1.01505e-06
BSG	1325.83	0.473901	0.0559865	72.1459	2.15631e-16	1.41839e-15
BSN	1.02939	0.0705221	1.75528	0.286989	0.866325	0.906319
BST1	15.099	-2.06619	0.481929	44.824	1.84757e-10	9.11887e-10
BST2	4.36286	-2.9003	1.02102	23.8037	6.77793e-06	2.37028e-05
BTAF1	582.597	0.592156	0.0753166	69.1639	9.57742e-16	6.13962e-15
BTBD1	1306.51	0.435713	0.0631667	77.4734	1.5027e-17	1.02567e-16
BTBD10	227.525	-0.149629	0.117734	2.64286	0.266753	0.382038
BTBD11	29.6985	3.47902	0.450263	77.7156	1.33132e-17	9.10785e-17
BTBD18	1.22092	-1.04016	1.56058	0.500481	0.778614	0.845684
BTBD19	78.1683	1.2227	0.214998	36.7625	1.04022e-08	4.56431e-08
BTBD2	244.907	-0.0507556	0.114562	2.41179	0.299424	0.418193
BTBD3	347.572	-0.530974	0.0970579	48.6933	2.66924e-11	1.37877e-10
BTBD6	138.772	-0.386221	0.159194	6.74616	0.034284	0.0666665
BTBD8	4.34254	-0.243755	0.849316	0.117249	0.943061	0.957554
BTBD9	162.937	0.62595	0.144205	23.4014	8.28781e-06	2.86794e-05
BTD	52.4479	-0.630328	0.241114	23.3547	8.48381e-06	2.93098e-05
BTF3	1029.04	-0.259366	0.0629306	23.5478	7.70288e-06	2.67309e-05
BTF3L4	251.129	-0.0918868	0.109408	11.5545	0.00309727	0.0075223
BTG1	1485.73	2.00741	0.0591365	1357.77	1.46042e-295	1.14871e-293
BTG2	74.9091	-1.01841	0.209776	63.4028	1.70705e-14	1.03537e-13
BTG3	224.032	-1.24122	0.135593	112.144	4.4489e-25	3.87675e-24
BTN2A1	287.201	0.487147	0.107526	22.7164	1.16731e-05	3.97291e-05
BTN2A2	76.838	0.909854	0.207051	22.1414	1.55618e-05	5.23281e-05
BTN2A3P	14.3891	0.689478	0.447806	2.41222	0.299359	0.418141
BTN3A1	47.2158	-0.880941	0.275932	12.9033	0.00157792	0.00404716
BTN3A2	91.1801	-0.0885849	0.179269	0.303203	0.859331	0.901221
BTN3A3	37.6916	-1.11631	0.291883	46.9202	6.47736e-11	3.28083e-10
BTRC	210.587	-0.00619042	0.127147	0.691648	0.707637	0.790779
BUB1	94.7874	-4.97405	0.3911	336.184	9.96707e-74	2.04938e-72
BUB1B	59.5887	-4.22197	0.404822	175.79	6.72629e-39	8.09005e-38
BUB3	812.97	-0.406903	0.0669167	38.8873	3.59527e-09	1.63048e-08
BUD13	31.9093	-0.473743	0.30351	5.6545	0.0591753	0.107398
BUD23	130.2	-0.449065	0.1527	8.87171	0.011845	0.0257137
BUD31	134.302	0.128386	0.153322	2.95006	0.228772	0.337271
BVES	259.836	0.40202	0.11634	89.8069	3.15261e-20	2.3682e-19
BVES.AS1	2.43492	1.3539	1.30237	2.4141	0.299079	0.417906
BYSL	98.3268	-0.263921	0.186384	4.93858	0.084645	0.146361
BZW1	1084.9	0.559826	0.0639779	92.7776	7.13825e-21	5.47278e-20
BZW2	502.042	-0.138805	0.0825846	2.97749	0.225656	0.333526
C10orf105	8.13931	1.44002	0.594975	7.78373	0.0204073	0.0421119
C10orf111	2.78108	-0.88829	1.00494	7.58532	0.0225356	0.0459301
C10orf143	6.32848	0.42965	0.65305	4.02347	0.133757	0.215852
C10orf25	15.8075	-0.203333	0.446908	0.585001	0.746395	0.821614
C10orf55	3.30974	-1.07	1.07811	0.968164	0.616263	0.716795
C10orf67	3.07189	1.10611	1.0853	2.53927	0.280934	0.398204
C10orf88	140.869	0.147997	0.150106	3.32595	0.189574	0.289492
C10orf90	1.54817	2.30192	1.52252	2.64547	0.266406	0.381688
C11orf1	26.7499	-0.506086	0.339836	4.79724	0.0908432	0.155751
C11orf24	249.392	-0.462805	0.118587	20.9308	2.85053e-05	9.25848e-05
C11orf44	0.84989	-0.90662	2.02843	0.253701	0.880865	0.915923
C11orf45	3.91603	-0.0508428	0.839037	0.979124	0.612895	0.714561
C11orf49	73.9806	-0.315715	0.215457	6.80289	0.0333251	0.0649378
C11orf54	156.127	0.458653	0.145669	10.1127	0.00636869	0.0145143
C11orf58	1251.8	-0.136079	0.0562102	16.6295	0.000244875	0.000707818
C11orf65	4.28625	0.302584	0.849007	0.181279	0.913347	0.938018
C11orf68	147.781	-0.454053	0.147986	9.95442	0.00689325	0.0156069
C11orf71	10.4013	0.0126865	0.548977	0.615792	0.734992	0.812854
C11orf74	34.991	-1.01807	0.304822	15.27	0.000483236	0.00134176
C11orf80	25.1074	0.191067	0.355657	1.44049	0.486632	0.605886
C11orf87	3.62668	-1.83908	0.949857	8.21297	0.0164656	0.0347251
C11orf88	1.32613	-2.92818	1.64794	9.59392	0.0082548	0.0184563
C11orf91	43.6606	1.76218	0.299164	46.5019	7.98444e-11	4.01953e-10
C11orf95	265.7	1.16083	0.113909	119.555	1.09363e-26	9.98643e-26
C11orf96	77.2873	4.76167	0.474869	294.847	9.43718e-65	1.75366e-63
C11orf98	2.2996	1.75614	1.25602	1.98738	0.370209	0.492971
C12orf10	90.2858	0.581225	0.188134	9.99702	0.00674798	0.0153224
C12orf29	330.287	0.664126	0.103693	58.6244	1.86158e-13	1.07766e-12
C12orf4	161.864	-0.484564	0.136499	24.5799	4.5977e-06	1.63086e-05
C12orf43	62.613	0.22975	0.230432	1.41072	0.493931	0.612715
C12orf45	19.4211	-1.05347	0.422845	6.77073	0.0338653	0.0659299
C12orf49	305.374	0.987758	0.106525	92.6927	7.44802e-21	5.70733e-20
C12orf56	3.99726	5.27796	1.43125	16.0617	0.000325265	0.000927386
C12orf57	244.876	0.82486	0.113952	55.7142	7.97636e-13	4.47628e-12
C12orf60	3.54001	0.148671	0.996252	0.0500219	0.975299	0.979836
C12orf65	45.8251	-1.06142	0.276445	19.177	6.85108e-05	0.000213205
C12orf66	38.478	0.504277	0.286201	5.76846	0.0558978	0.102224
C12orf73	28.9222	1.48168	0.323685	31.784	1.25367e-07	5.08236e-07
C12orf75	4892.23	-1.92002	0.0432754	2029.13	0	0
C12orf76	23.3115	0.268524	0.353264	3.56417	0.168287	0.261471
C14orf119	389.742	0.423108	0.0954586	30.8561	1.9938e-07	7.94848e-07
C14orf132	482.512	0.210051	0.0817492	15.8168	0.000367638	0.00103962
C14orf28	49.0124	0.143639	0.246977	1.11704	0.572054	0.68015
C14orf93	12.3605	-0.983666	0.503963	4.33629	0.11439	0.189388
C15orf39	57.4097	0.508692	0.231811	5.57057	0.0617115	0.111376
C15orf40	53.9505	-0.0979217	0.236037	0.501073	0.778383	0.845557
C15orf41	62.1704	-1.80552	0.24123	81.8469	1.6872e-18	1.19154e-17
C15orf48	178.314	4.63918	0.252783	568.598	3.39212e-124	1.1206e-122
C15orf61	38.3165	-0.194532	0.292351	1.57089	0.455918	0.576431
C15orf62	5.54343	-0.354726	0.765893	2.80603	0.245855	0.358006
C15orf65	7.5806	0.922504	0.647976	2.14139	0.342771	0.464537
C16orf46	15.4469	-0.00415833	0.482265	0.695724	0.706196	0.789822
C16orf58	143.614	-0.516833	0.146603	13.5479	0.00114314	0.00300725
C16orf70	91.1868	0.396001	0.197743	4.30794	0.116023	0.191771
C16orf71	1.07066	-0.107519	1.68726	0.105951	0.948403	0.961216
C16orf72	626.583	0.506083	0.0767071	91.7281	1.20644e-20	9.15044e-20
C16orf74	18.6769	0.395799	0.454146	13.5204	0.001159	0.0030468
C16orf86	3.02211	-0.615608	1.01884	0.408077	0.815431	0.871549
C16orf87	94.086	-0.552859	0.182674	12.326	0.00210588	0.00528372
C16orf90	20.2503	-0.278578	0.4162	0.733151	0.693104	0.778997
C16orf91	40.899	0.731226	0.302408	6.23872	0.0441854	0.083379
C16orf95	8.88128	-0.324264	0.567593	1.18302	0.55349	0.665208
C17orf100	7.68474	0.849475	0.65347	2.79708	0.246957	0.359258
C17orf107	1.54516	-0.119565	1.31139	1.59565	0.450308	0.571031
C17orf51	210.966	1.14201	0.127798	117.351	3.29285e-26	2.97036e-25
C17orf53	11.5247	-0.384199	0.537781	0.658064	0.71962	0.80026
C17orf58	60.2022	-0.26073	0.221456	7.24968	0.0266534	0.05335
C17orf67	21.7659	-0.293	0.376834	0.748504	0.687803	0.774906
C17orf75	76.7353	-1.13814	0.205175	43.0924	4.39142e-10	2.11751e-09
C17orf80	113.502	-0.705046	0.166427	25.09	3.56259e-06	1.27495e-05
C17orf82	1.24466	1.02665	1.47113	1.17034	0.557012	0.668378
C17orf97	4.97405	-1.15821	0.814789	2.13447	0.343959	0.465819
C18orf21	94.0626	0.0491415	0.184114	0.753983	0.685922	0.773021
C18orf25	300.732	-0.0882636	0.101968	1.77738	0.411194	0.53415
C18orf32	4.59513	1.25139	0.858021	2.20704	0.331702	0.453179
C18orf54	89.447	-0.852736	0.186283	41.3406	1.05441e-09	4.97299e-09
C18orf65	3.94433	1.36234	0.895795	2.3853	0.303416	0.422854
C19orf12	282.125	0.0595278	0.110244	1.83258	0.4	0.522944
C19orf18	3.15301	0.120926	0.956065	0.154209	0.925793	0.946485
C19orf24	99.9312	0.665919	0.173998	17.3022	0.000174934	0.000515578
C19orf25	70.5162	-0.120915	0.214836	1.82919	0.400678	0.523633
C19orf38	0.915975	2.05003	1.95791	1.08289	0.581907	0.68868
C19orf44	21.6258	0.0613277	0.367106	0.136888	0.933846	0.951284
C19orf47	44.8133	-0.111688	0.285004	0.407759	0.815561	0.871549
C19orf48	53.9756	-0.948738	0.244256	18.3125	0.000105557	0.000320574
C19orf53	308.647	0.84106	0.103698	66.3584	3.89451e-15	2.43157e-14
C19orf54	16.9703	-0.00138349	0.40491	1.12723	0.569148	0.67807
C19orf66	106.105	0.195009	0.17664	2.01852	0.364489	0.487231
C19orf70	69.1125	0.114304	0.208498	1.95383	0.37647	0.499474
C19orf71	15.2882	0.946247	0.455324	4.59115	0.100703	0.170023
C19orf73	0.987438	1.10332	1.81774	0.619906	0.733481	0.811425
C1D	183.994	-0.0592796	0.132345	5.98906	0.0500601	0.0927113
C1GALT1	763.345	0.647152	0.0693772	117.538	2.99895e-26	2.71348e-25
C1GALT1C1	442.041	0.788466	0.0905837	82.5452	1.18995e-18	8.47209e-18
C1orf100	0.88511	0.523779	2.16637	1.84859	0.396811	0.519826
C1orf109	160.49	-0.19826	0.140481	2.53508	0.281523	0.398773
C1orf112	46.3509	-1.01393	0.262232	18.5597	9.32844e-05	0.000285108
C1orf115	6.1031	-3.33264	0.993596	17.4986	0.000158569	0.000470329
C1orf122	192.664	0.363441	0.123585	15.4246	0.000447302	0.00125016
C1orf123	72.2344	-0.35555	0.207741	5.26576	0.0718711	0.127134
C1orf131	71.8595	-0.444284	0.214394	9.30715	0.00952749	0.0210767
C1orf146	0.860012	-1.61243	1.81962	0.986976	0.610493	0.712818
C1orf159	32.4101	0.766607	0.316532	6.81061	0.0331967	0.0647386
C1orf162	0.858863	0.323303	1.85016	0.0948912	0.953662	0.964638
C1orf174	114.792	-0.180965	0.16606	1.35554	0.507747	0.6249
C1orf198	492.278	-1.91688	0.093631	615.35	2.38984e-134	8.43881e-133
C1orf21	56.4717	-1.06975	0.238445	47.6651	4.46322e-11	2.27929e-10
C1orf216	154.695	0.292428	0.144928	5.24226	0.0727207	0.128367
C1orf220	4.24332	-1.39535	0.896289	2.59347	0.273423	0.389489
C1orf226	5.35451	-2.70781	0.878336	19.8301	4.94254e-05	0.000156465
C1orf229	2.38564	1.89243	1.23277	2.487	0.288373	0.405846
C1orf35	53.026	0.138493	0.261704	1.23065	0.540464	0.653906
C1orf43	764.461	-0.0088138	0.0729285	51.9063	5.35409e-12	2.86206e-11
C1orf50	28.2633	0.155489	0.333332	0.33955	0.843855	0.891387
C1orf52	194.731	0.489228	0.126195	18.8562	8.04315e-05	0.000248121
C1orf53	43.743	-0.336482	0.251179	16.3456	0.000282226	0.000810112
C1orf54	25.0605	0.564989	0.3697	4.5064	0.105062	0.176024
C1orf56	13.1805	0.395213	0.48369	0.858818	0.650894	0.744723
C1orf74	14.4675	-0.297404	0.456458	0.514178	0.773299	0.841818
C1QBP	371.507	-0.204483	0.0963767	29.7743	3.42453e-07	1.34396e-06
C1QL3	4.05144	-0.836665	0.878508	1.61233	0.446568	0.567699
C1QTNF1	178.949	0.517983	0.146776	53.9927	1.88644e-12	1.03827e-11
C1QTNF2	3.09847	-1.27438	1.03618	5.75767	0.0562003	0.102635
C1QTNF3	3.6415	-0.351762	0.91935	3.43632	0.179396	0.276277
C1QTNF6	18.0937	0.0558426	0.398201	3.33308	0.188899	0.288623
C1R	89.5373	-1.35811	0.183203	179.434	1.08761e-39	1.33293e-38
C1RL	89.6243	-0.178058	0.180283	16.4095	0.000273352	0.000786463
C1RL.AS1	34.3925	0.411288	0.296893	2.17091	0.337748	0.459401
C1S	176.656	-0.837721	0.133962	154.603	2.68191e-34	2.93373e-33
C20orf144	1.06064	1.40839	1.93333	2.20687	0.33173	0.453179
C20orf194	389.986	0.164771	0.0886285	4.77791	0.0917256	0.156951
C20orf27	72.0767	-0.241038	0.222421	1.27366	0.528966	0.644242
C20orf96	12.287	0.10584	0.477308	0.553163	0.758372	0.830984
C21orf58	11.1942	-1.8408	0.553701	21.8934	1.7616e-05	5.87701e-05
C21orf59.TCP10L	3.14848	-0.317769	0.9888	0.230394	0.891191	0.9233
C21orf91	110.644	-0.650759	0.172522	14.4703	0.000720789	0.00195498
C22orf23	46.8135	-0.0269385	0.26774	0.624163	0.731922	0.809941
C22orf24	0.969574	-3.11404	1.80107	3.66839	0.159742	0.249919
C22orf39	42.5889	-0.524321	0.266281	4.94432	0.0844025	0.146034
C22orf46	29.207	-0.834729	0.324903	7.39977	0.0247263	0.0499161
C2CD2	1165.85	2.26121	0.0662688	1460.26	8.10463309175397e-318	6.88477004198287e-316
C2CD2L	65.2408	1.05484	0.223848	23.7257	7.04757e-06	2.46015e-05
C2CD3	138.714	-0.517012	0.149215	13.0171	0.00149067	0.0038446
C2CD4A	1.3662	1.54293	1.98196	8.88954	0.0117398	0.025504
C2CD4C	1.88489	3.57703	1.54751	6.31312	0.042572	0.0807754
C2CD5	156.705	-1.14347	0.144623	92.9665	6.49517e-21	4.99261e-20
C2CD6	3.61141	0.373453	0.927744	0.292597	0.8639	0.904481
C2orf15	1.63128	1.13097	1.32957	2.50906	0.285209	0.402766
C2orf16	19.501	0.421837	0.419977	7.02478	0.0298256	0.0589062
C2orf27A	28.1107	0.545471	0.33836	5.33626	0.0693817	0.123303
C2orf42	77.016	0.311286	0.227851	4.0292	0.133374	0.215374
C2orf49	207.575	-0.177227	0.128371	3.88403	0.143415	0.229012
C2orf66	7.63477	0.422648	0.629462	0.50138	0.778263	0.845557
C2orf68	62.3657	-0.595597	0.222509	7.53356	0.0231264	0.0469925
C2orf69	322.183	0.0697905	0.0999519	6.85933	0.0323977	0.0633467
C2orf74	67.0341	-0.666407	0.214858	12.9009	0.00157978	0.00405122
C2orf76	49.986	0.459679	0.244845	4.48281	0.106309	0.177872
C2orf81	8.62031	1.26996	0.621888	4.5071	0.105026	0.175982
C2orf88	8.84239	-0.563304	0.613368	1.48412	0.476131	0.595856
C2orf92	11.5389	1.06089	0.522019	4.52387	0.104149	0.174749
C3	122.656	0.446017	0.187483	91.8011	1.16319e-20	8.83147e-20
C3AR1	17.1249	3.92229	0.620389	55.3218	9.70575e-13	5.4304e-12
C3orf14	46.3843	0.14961	0.257189	1.39044	0.498965	0.617025
C3orf18	35.5327	-0.0515365	0.292979	8.18082	0.0167324	0.0352079
C3orf33	19.8888	-0.566959	0.399368	2.21252	0.330793	0.45219
C3orf35	3.42248	0.168142	0.901397	0.907708	0.635176	0.731561
C3orf38	228.833	0.21348	0.116963	3.36498	0.185911	0.284746
C3orf49	0.91792	-0.888966	1.9679	0.629642	0.729919	0.808447
C3orf52	58.0928	0.270084	0.233821	12.2915	0.00214257	0.00536762
C3orf58	516.98	0.601502	0.0855975	86.5166	1.63362e-19	1.1981e-18
C3orf62	36.1596	0.162042	0.289114	0.438312	0.803197	0.863676
C3orf67	90.4631	2.05594	0.21755	128.511	1.24204e-28	1.19741e-27
C3orf70	11.991	-1.78273	0.585664	10.6149	0.0049545	0.0115716
C3orf80	2.80525	-0.55397	1.0182	0.337896	0.844553	0.891721
C4orf3	816.7	0.983635	0.0690455	317.891	9.35195e-70	1.8463e-68
C4orf33	28.703	-2.18323	0.376565	48.4834	2.96459e-11	1.52603e-10
C4orf36	2.94735	-1.98664	1.16336	3.24687	0.19722	0.299232
C4orf46	185.81	-0.604632	0.132972	25.9244	2.34742e-06	8.53849e-06
C4orf47	1.68931	0.980833	1.35607	0.713082	0.700094	0.784472
C4orf48	113.513	0.296994	0.161031	18.1195	0.000116253	0.000350907
C5	19.5599	-0.953125	0.401721	11.4447	0.00327201	0.00790281
C5AR1	4.62429	1.40987	0.808649	4.29508	0.116771	0.19273
C5orf15	757.881	0.155325	0.0734201	38.7157	3.91733e-09	1.77276e-08
C5orf17	5.06701	-1.94891	0.85777	6.61721	0.0365671	0.07058
C5orf22	167.193	-0.463402	0.137904	15.4348	0.000445018	0.00124495
C5orf24	1985.13	0.315353	0.0562401	54.5497	1.42784e-12	7.90549e-12
C5orf30	842.612	-2.28339	0.0780445	1261.64	1.09097e-274	7.83498e-273
C5orf34	48.4134	0.61833	0.246978	6.33865	0.042032	0.0799141
C5orf38	23.1499	0.650184	0.368023	5.4225	0.0664535	0.118766
C5orf51	900.536	0.629137	0.0699496	111.24	6.99273e-25	6.0544e-24
C5orf56	4.24608	-1.55225	0.939822	3.36184	0.186203	0.285135
C5orf63	7.33873	-1.62485	0.675956	11.4512	0.00326147	0.00788119
C5orf66	25.016	-0.416487	0.340451	1.84116	0.398288	0.521303
C6	1.64402	1.22892	1.35536	1.16587	0.558257	0.669239
C6orf106	716.647	0.830038	0.0746526	181.489	3.89175e-40	4.8092e-39
C6orf120	607.125	-0.472187	0.0832823	39.2809	2.95294e-09	1.34658e-08
C6orf132	10.3838	-2.90656	0.680692	29.4696	3.98794e-07	1.55889e-06
C6orf141	5.54627	2.24041	0.791204	10.7632	0.00460052	0.0107958
C6orf163	2.45572	-1.23836	1.11208	2.58502	0.274581	0.390726
C6orf201	7.39385	0.0105555	0.660953	0.584587	0.746549	0.82166
C6orf203	61.0476	-0.0237348	0.224798	1.41775	0.492197	0.611176
C6orf226	16.1091	0.281196	0.416396	0.787082	0.674663	0.763691
C6orf62	1020.82	-0.0968098	0.0617029	3.31659	0.190463	0.290581
C6orf89	640.81	-0.156007	0.0741333	16.7464	0.000230977	0.000669861
C7orf25	71.936	0.197561	0.213615	0.940629	0.624806	0.723844
C7orf26	64.2869	-0.160079	0.228788	0.730852	0.693901	0.779678
C7orf31	7.28582	-1.22626	0.648249	7.91586	0.0191026	0.0397229
C7orf43	102.917	0.691286	0.191159	13.5145	0.00116243	0.00305419
C7orf50	110.913	-0.442556	0.164558	27.9883	8.36388e-07	3.17999e-06
C7orf57	4.60386	1.51103	0.937808	6.17884	0.0455283	0.0856207
C7orf61	2.69175	0.952772	1.06072	1.03828	0.595031	0.699433
C8G	1.36987	0.656573	1.46207	0.724214	0.696208	0.781473
C8orf33	187.868	0.152775	0.131778	2.2589	0.323211	0.444195
C8orf34	7.07556	-2.88736	0.817891	22.6881	1.18399e-05	4.0259e-05
C8orf37	20.0929	-0.955275	0.390548	11.378	0.00338291	0.00814286
C8orf44	9.97243	-1.29974	0.568625	6.44475	0.0398603	0.0763514
C8orf48	12.8761	-0.543761	0.487992	1.51148	0.469662	0.589148
C8orf58	41.7657	-0.642805	0.267492	8.00846	0.0182384	0.0380963
C8orf59	159.768	-0.290279	0.140842	4.80377	0.0905473	0.1554
C8orf76	58.1302	0.176938	0.235427	1.29956	0.52216	0.638043
C8orf82	65.9999	0.498689	0.221643	5.852	0.0536112	0.0985081
C8orf88	18.8018	-0.947756	0.420248	5.5496	0.0623621	0.112427
C9orf116	4.06124	-1.16106	0.864369	3.69283	0.157802	0.247326
C9orf16	133.924	1.73273	0.157022	134.417	6.48269e-30	6.46356e-29
C9orf163	1.22473	0.758259	1.56899	0.243411	0.885409	0.918976
C9orf3	51.5534	-1.36966	0.252364	47.7782	4.2178e-11	2.15841e-10
C9orf40	73.1821	-0.835809	0.208244	19.9176	4.73105e-05	0.000150121
C9orf41.AS1	1.51509	-0.653467	1.56922	2.049	0.358977	0.481354
C9orf43	1.39132	-0.239831	1.54521	0.120831	0.941373	0.956363
C9orf47	7.54167	-2.14314	0.725723	13.449	0.00120112	0.00314918
C9orf64	51.5495	-0.0994555	0.249548	0.549783	0.759654	0.83183
C9orf72	131.963	3.38437	0.211676	336.578	8.18303e-74	1.68957e-72
C9orf78	320.1	0.560213	0.101278	38.2872	4.8534e-09	2.18175e-08
C9orf84	2.98983	-0.829722	1.0666	1.00304	0.60561	0.709009
C9orf85	106.861	0.37362	0.183155	7.05485	0.0293804	0.0581197
CA11	5.80769	0.221091	0.702927	2.62653	0.268941	0.38443
CA12	156.976	0.54705	0.155065	85.6535	2.51526e-19	1.83473e-18
CA13	2.72961	2.19622	1.10245	5.31157	0.0702436	0.124626
CA14	1.96699	-0.718609	1.41183	1.32568	0.515386	0.632013
CA5B	23.8511	-0.0793836	0.353515	0.539599	0.763533	0.834547
CA5BP1	13.2394	0.59595	0.493459	3.06871	0.215595	0.321532
CA7	1.06624	0.751344	1.68437	0.212589	0.89916	0.928451
CAAP1	216.146	0.209573	0.126455	3.06848	0.215619	0.321536
CAB39	1270.67	0.467255	0.0586855	72.9443	1.44662e-16	9.57925e-16
CAB39L	281.375	0.357406	0.11858	217.018	7.5013e-48	1.07432e-46
CABCOCO1	0.942744	-3.54812	1.88035	8.06631	0.0177183	0.0371196
CABIN1	211.645	-0.224815	0.126497	3.45926	0.17735	0.273608
CABLES1	33.7355	-1.90517	0.350346	33.3235	5.80611e-08	2.42182e-07
CABLES2	43.7626	-0.315455	0.271076	2.34679	0.309315	0.429212
CABP7	1.0994	0.776471	1.54326	1.22566	0.541815	0.655058
CABYR	16.7203	-1.45474	0.441222	16.3786	0.000277609	0.000797939
CACFD1	23.285	0.590806	0.358102	3.73763	0.154306	0.242896
CACHD1	89.291	0.829465	0.195491	51.9067	5.35312e-12	2.86206e-11
CACNA1A	354.856	1.51873	0.104641	270.511	1.81631e-59	3.09647e-58
CACNA1C	69.8403	-1.22849	0.204698	117.982	2.40126e-26	2.18197e-25
CACNA1G	1.46663	0.760118	1.34702	1.84975	0.396581	0.519617
CACNA2D1	1718.38	2.07579	0.0587596	1249.6	4.48652e-272	3.14606e-270
CACNA2D2	2.30348	-0.177743	1.1581	0.509051	0.775284	0.843547
CACNA2D3	1.67659	-0.494057	1.43513	0.476801	0.787887	0.852331
CACNB1	24.8627	0.39415	0.368842	1.20102	0.548532	0.660174
CACNB2	1.94304	-2.92856	1.48151	4.59538	0.100491	0.169718
CACNB3	101.665	-0.459089	0.17485	8.90322	0.0116598	0.0253487
CACNB4	3.56009	0.121361	0.91301	2.31733	0.313905	0.433933
CACNG7	15.0902	1.59073	0.49128	15.9746	0.000339755	0.000966106
CACNG8	8.30035	1.41373	0.627629	5.45207	0.0654783	0.117291
CACTIN	40.3078	-0.0550478	0.28171	0.446437	0.79994	0.861442
CACTIN.AS1	1.82983	0.665932	1.27172	0.283153	0.867989	0.90729
CACUL1	554.256	0.672802	0.079666	88.607	5.74432e-20	4.26762e-19
CACYBP	355.176	0.0989583	0.0982951	15.6321	0.000403202	0.00113458
CAD	269.059	-0.488121	0.108008	21.3361	2.32766e-05	7.65197e-05
CADM1	9.19334	-0.674409	0.536574	23.5512	7.68992e-06	2.66974e-05
CADM4	5.33017	0.286298	0.73126	2.95858	0.227799	0.336058
CADPS	2.37205	0.533006	1.96939	0.0830647	0.959318	0.96857
CADPS2	14.7333	0.616396	0.438539	2.14403	0.342317	0.464315
CAHM	2.87245	1.16476	1.1236	1.18526	0.552872	0.664565
CALCOCO1	281.121	0.482973	0.104352	21.8063	1.84005e-05	6.12225e-05
CALCOCO2	538.069	0.346137	0.0867848	16.7506	0.000230493	0.000668717
CALCRL	41.5043	1.38033	0.315316	58.3606	2.12399e-13	1.22765e-12
CALD1	10169	-2.4231	0.0348295	6111.4	0	0
CALHM1	0.853744	0.492781	1.90923	0.136892	0.933844	0.951284
CALHM2	138.029	-0.249066	0.146427	21.6988	1.94158e-05	6.43701e-05
CALHM4	0.948806	-0.331019	1.9387	1.23081	0.540422	0.653906
CALHM5	74.8541	-0.34209	0.202767	11.2458	0.00361412	0.00865595
CALHM6	2.84884	-0.21106	0.994719	0.82737	0.661209	0.753164
CALM1	2833.33	0.484079	0.042331	140.341	3.35289e-31	3.43752e-30
CALM2	5550.45	-0.252903	0.0391747	41.8831	8.03895e-10	3.81934e-09
CALM3	962.77	-0.519321	0.0600839	152.511	7.63045e-34	8.27987e-33
CALML4	18.4663	-0.82412	0.411541	4.58007	0.101263	0.170833
CALR	3948.12	-0.205635	0.0397051	117.282	3.40877e-26	3.07306e-25
CALU	8341.38	0.0517796	0.0355755	97.5643	6.51899e-22	5.16309e-21
CAMK1	63.0043	0.573512	0.22795	8.85909	0.0119199	0.0258575
CAMK1D	13.2322	0.250926	0.478891	11.3977	0.00334976	0.00807354
CAMK1G	1.24938	0.193519	1.63462	0.483848	0.785116	0.850113
CAMK2D	1153.31	-0.5617	0.0567438	184.913	7.02412e-41	8.82676e-40
CAMK2G	153.65	-0.343199	0.142198	13.739	0.00103898	0.00274977
CAMK2N1	1921.4	0.7603	0.0467735	375.43	2.99575e-82	6.94772e-81
CAMK2N2	4.41917	2.17689	0.885774	6.88861	0.031927	0.0625414
CAMK4	55.8397	-1.48842	0.253195	52.9202	3.22502e-12	1.74784e-11
CAMKK1	49.1243	1.35705	0.257547	31.4487	1.48256e-07	5.97282e-07
CAMKK2	196.976	-0.45286	0.124431	19.3842	6.17693e-05	0.000193156
CAMKMT	19.5869	-0.326981	0.394521	2.18165	0.33594	0.45771
CAMLG	257.726	0.196685	0.111287	5.39901	0.0672388	0.119964
CAMSAP1	230.034	0.466094	0.116583	20.5231	3.49507e-05	0.000112365
CAMSAP2	1197.98	0.748867	0.0639913	177.952	2.28091e-39	2.77707e-38
CAMTA1	280.782	0.57864	0.107831	36.9588	9.4299e-09	4.1524e-08
CAMTA1.DT	0.836417	1.74436	2.05172	1.20818	0.54657	0.658406
CAMTA2	218.237	-0.267183	0.12557	4.78206	0.0915354	0.15668
CAND1	1388.08	-0.0655788	0.0602963	1.72815	0.421442	0.544275
CAND2	6.8826	-2.14278	0.744915	14.9865	0.000556825	0.00153377
CANT1	584.54	0.733102	0.0785502	119.9	9.20605e-27	8.43236e-26
CANX	5997.2	0.270221	0.0381603	52.2348	4.5431e-12	2.43731e-11
CAP1	3436.87	0.13156	0.0398615	41.9939	7.60567e-10	3.62274e-09
CAP2	293.472	-2.14507	0.116231	492.795	9.79433e-108	2.88322e-106
CAPG	140.097	0.690888	0.154752	21.6939	1.9464e-05	6.45153e-05
CAPN1	744.772	0.0777896	0.0715047	2.11508	0.347309	0.469329
CAPN10	47.0878	0.260381	0.26905	1.1236	0.570183	0.678867
CAPN10.DT	9.70815	-0.813088	0.564127	4.52561	0.104058	0.174637
CAPN11	3.55581	5.42095	1.3996	17.709	0.000142737	0.000426347
CAPN12	1.54469	-0.103915	1.48828	0.858627	0.650956	0.744737
CAPN14	1.48492	-0.704476	1.42257	0.255167	0.88022	0.915496
CAPN15	140.329	0.311892	0.153545	8.28965	0.0158462	0.0335809
CAPN2	4057.82	0.527609	0.0368928	291.685	4.58642e-64	8.40712e-63
CAPN3	16.8353	-1.33543	0.460787	9.48066	0.00873578	0.019441
CAPN5	241.04	1.24515	0.128288	98.9042	3.33604e-22	2.66776e-21
CAPN7	358.176	0.306838	0.0984801	9.90478	0.00706651	0.0159603
CAPNS1	1263.97	-0.220164	0.058668	14.0892	0.000872093	0.00233595
CAPRIN1	2567.06	-0.0845655	0.0448165	25.0953	3.5533e-06	1.27193e-05
CAPRIN2	289.585	0.20013	0.103209	3.82745	0.14753	0.234239
CAPS	5.15302	-0.0629046	0.730916	4.01559	0.134284	0.216468
CAPS2	11.4278	-1.53263	0.548436	14.1512	0.000845472	0.00226996
CAPZA1	2649.26	0.18977	0.0434922	24.4722	4.85211e-06	1.7166e-05
CAPZA2	1704.72	0.275705	0.0521832	44.7506	1.91658e-10	9.45005e-10
CAPZB	1603.91	0.0148333	0.0580863	9.84974	0.00726366	0.016377
CARD10	14.593	-1.44022	0.474269	14.3185	0.000777641	0.0020958
CARD14	4.40049	-0.20902	0.846145	0.591371	0.744021	0.819852
CARD16	19.4166	-0.987872	0.418628	5.73438	0.0568585	0.103687
CARD19	207.316	1.20076	0.122711	97.4098	7.04252e-22	5.56884e-21
CARD6	123.344	0.76129	0.163778	30.2908	2.64503e-07	1.04577e-06
CARD8	147.381	0.182946	0.145443	2.2147	0.330434	0.451824
CARD8.AS1	14.3242	0.692422	0.50699	4.53231	0.10371	0.17419
CARD9	8.88386	-0.0199453	0.556104	1.32071	0.516668	0.633137
CARF	45.7009	-0.318509	0.261568	2.97167	0.226313	0.334331
CARHSP1	104.255	-0.127239	0.168336	2.17114	0.337708	0.459401
CARM1	366.191	-0.178087	0.0991081	7.33457	0.0255457	0.0513956
CARMIL1	104.159	-0.109207	0.172815	0.774713	0.678849	0.767318
CARMIL2	2.05191	-0.214368	1.24752	0.138005	0.933324	0.951176
CARMN	3.97947	-5.54829	1.37836	29.0366	4.95202e-07	1.9211e-06
CARNMT1	367.584	1.22292	0.10024	200.699	2.62305e-44	3.51616e-43
CARNS1	6.63328	5.21069	1.29692	27.5832	1.02418e-06	3.85943e-06
CARS	15.6341	-0.252713	0.426025	1.10989	0.574103	0.681842
CARS2	378.319	1.15725	0.0970844	174.293	1.42178e-38	1.70453e-37
CASC10	9.48304	-1.02204	0.553319	7.68096	0.0214833	0.0440225
CASC2	3.55929	-3.2817	1.21466	10.6362	0.00490215	0.0114566
CASC3	284.577	0.163983	0.106932	6.49071	0.0389548	0.0747904
CASC4	1468.23	0.00587779	0.0589392	14.1132	0.000861709	0.00230939
CASD1	195.066	-0.480677	0.137182	19.6047	5.53222e-05	0.00017358
CASK	196.524	0.349597	0.134102	23.9891	6.17793e-06	2.1676e-05
CASKIN2	37.8723	-0.625685	0.2807	6.72598	0.0346316	0.0672458
CASP1	54.1253	-1.31006	0.254835	30.5686	2.30208e-07	9.14069e-07
CASP10	13.9865	0.176394	0.468786	1.49	0.474733	0.594507
CASP2	164.02	-0.041591	0.139327	0.756588	0.685029	0.77219
CASP3	785.974	-0.447669	0.0792064	33.6539	4.92209e-08	2.06234e-07
CASP4	365.41	0.589874	0.0973596	45.5057	1.31388e-10	6.53686e-10
CASP6	57.9153	-0.262226	0.22622	9.48292	0.00872591	0.019422
CASP7	227.188	0.426104	0.116743	14.7083	0.000639926	0.00174553
CASP8	144.088	0.585929	0.159235	18.8055	8.24984e-05	0.000254
CASP8AP2	224.978	-0.403357	0.130158	9.99755	0.00674622	0.0153221
CASP9	56.0035	0.691123	0.230298	15.3618	0.000461564	0.0012856
CASS4	4.61301	-1.39328	0.820578	9.00821	0.0110635	0.024169
CAST	2190.15	0.441724	0.0460263	92.3264	8.945e-21	6.8228e-20
CASTOR1	21.7193	0.476266	0.36728	4.53144	0.103755	0.174246
CASTOR2	94.308	1.14124	0.188384	37.5762	6.92509e-09	3.07309e-08
CASTOR3	35.2661	0.243111	0.299974	2.10784	0.348569	0.470524
CAT	458.556	-0.0709454	0.0850323	15.213	0.000497209	0.00137773
CATSPER1	5.39552	-0.78957	0.733915	4.27878	0.117727	0.194135
CATSPER2P1	1.08728	-1.59941	1.75071	1.20817	0.546575	0.658406
CATSPER3	1.84979	0.411247	1.40089	0.134644	0.934894	0.952123
CATSPERE	26.3054	2.17808	0.37718	37.0814	8.86924e-09	3.91363e-08
CATSPERG	0.823078	0.240552	2.06162	0.0972347	0.952546	0.964024
CAV1	8436.05	-2.2752	0.0376638	4469.9	0	0
CAV2	1453.51	-0.906767	0.0587493	387.316	7.8587e-85	1.88128e-83
CAVIN1	3332.71	-1.03126	0.0401143	895.954	2.79361e-195	1.45718e-193
CAVIN2	9.90431	-6.69802	1.25096	62.9724	2.11694e-14	1.27877e-13
CAVIN3	319.458	0.621076	0.100118	63.0381	2.04859e-14	1.23899e-13
CAVIN4	14.7497	-0.183835	0.480808	1.81695	0.403139	0.526193
CBARP	17.9821	1.00318	0.418804	5.80573	0.0548658	0.10051
CBFA2T2	106.295	0.396933	0.170476	5.48391	0.0644442	0.115606
CBFB	872.081	0.863173	0.0700389	180.331	6.9459e-40	8.55491e-39
CBL	898.224	1.08026	0.0655809	348.794	1.82114e-76	3.8954e-75
CBLB	247.032	0.716732	0.114669	40.2572	1.81244e-09	8.39631e-09
CBLL1	232.973	-0.0528875	0.125125	4.16317	0.124732	0.203493
CBLN3	25.8849	0.116654	0.333793	0.993214	0.608592	0.711144
CBLN4	1.32607	2.27383	1.8649	7.89271	0.019325	0.0401405
CBR1	400.487	0.602831	0.0983988	37.7009	6.50651e-09	2.89338e-08
CBR3	35.9576	0.316072	0.278398	3.96201	0.13793	0.221457
CBR3.AS1	7.00461	0.0793038	0.635134	2.82118	0.243999	0.355893
CBR4	128.754	0.145516	0.155671	4.50603	0.105082	0.176037
CBWD1	20.2706	-0.0389911	0.375852	0.289077	0.865422	0.905692
CBWD2	41.2967	0.167904	0.275685	0.841086	0.65669	0.749567
CBWD5	12.5972	-0.612219	0.48611	2.03459	0.361572	0.484114
CBWD6	2.41953	0.202238	1.08981	1.51876	0.467956	0.587678
CBX1	383.792	-0.807348	0.0965243	74.3349	7.21734e-17	4.81999e-16
CBX2	4.44047	0.116651	0.773984	4.61342	0.0995885	0.168466
CBX3	1538.36	0.183158	0.0625741	22.7191	1.16579e-05	3.96945e-05
CBX4	97.8973	0.572038	0.187956	11.7341	0.00283124	0.00692484
CBX5	1017.54	-0.46373	0.0680503	56.4397	5.54964e-13	3.12978e-12
CBX6	616.854	0.0855138	0.0737938	8.68217	0.0130224	0.0280429
CBX7	36.0686	-0.141294	0.291645	1.01035	0.603401	0.707147
CBX8	19.3649	0.54453	0.388687	2.00866	0.36629	0.489198
CBY1	60.7913	-0.951129	0.226174	24.5358	4.70034e-06	1.66528e-05
CC2D1A	60.9034	-0.104751	0.232469	6.25856	0.0437493	0.0826821
CC2D1B	152.343	0.19572	0.154553	1.93361	0.380297	0.503152
CC2D2A	51.4078	-1.97073	0.284733	69.4011	8.50649e-16	5.46017e-15
CC2D2B	1.41136	1.7352	1.46415	2.31964	0.313543	0.433634
CCAR1	817.505	-0.0484023	0.0681099	1.05727	0.58941	0.694868
CCAR2	241.643	0.110839	0.113922	1.24675	0.536131	0.650145
CCBE1	67.2294	-3.15888	0.296235	163.612	2.96504e-36	3.39848e-35
CCDC102A	18.8296	-0.34313	0.41472	1.36448	0.505483	0.622836
CCDC102B	11.8141	-0.335246	0.507204	0.44558	0.800283	0.86154
CCDC103	4.79488	0.294404	0.798977	0.220718	0.895513	0.926056
CCDC106	16.9489	-0.360924	0.416386	5.10423	0.0779165	0.136159
CCDC107	8.22033	0.469643	0.594845	0.946541	0.622961	0.722326
CCDC112	67.5329	-0.648791	0.213181	17.0082	0.00020264	0.000591952
CCDC113	5.70401	-2.11769	0.805517	11.1978	0.00370193	0.0088449
CCDC115	77.4573	-0.246106	0.200329	6.38208	0.041129	0.0784782
CCDC117	253.961	0.154807	0.122234	8.83099	0.0120885	0.0261813
CCDC12	63.5008	0.477841	0.216004	5.2435	0.0726754	0.128343
CCDC120	4.46587	-1.56618	0.929494	3.05761	0.216795	0.32303
CCDC121	7.17886	1.39771	0.665907	4.64566	0.0979956	0.166083
CCDC122	75.8648	-0.394677	0.202779	11.6165	0.00300264	0.0073104
CCDC124	48.4469	-0.428773	0.26309	8.71138	0.0128336	0.0276659
CCDC125	1.19226	1.30998	1.7042	0.811895	0.666345	0.757041
CCDC126	60.805	0.36422	0.23176	3.24042	0.197857	0.300045
CCDC127	68.8815	0.117472	0.210565	1.13833	0.565998	0.675779
CCDC130	55.1095	0.128806	0.234567	0.594407	0.742893	0.819155
CCDC134	8.17674	0.389536	0.596835	1.10778	0.574709	0.682398
CCDC136	61.3093	0.23039	0.22625	1.04338	0.593517	0.698317
CCDC137	89.8797	-0.43109	0.193056	6.10646	0.0472062	0.0883504
CCDC138	11.5463	-0.651178	0.515849	1.64856	0.438551	0.560047
CCDC14	596.91	-2.15466	0.0884706	1018.5	6.86448e-222	3.95533e-220
CCDC142	57.9135	1.14672	0.241014	23.1206	9.53751e-06	3.27296e-05
CCDC144B	35.8277	-0.928105	0.303721	10.2231	0.00602668	0.0138175
CCDC144CP	0.968646	-0.190341	1.63278	0.230741	0.891036	0.923205
CCDC144NL.AS1	1.76898	0.519185	1.22206	0.688079	0.708901	0.791577
CCDC146	12.2356	-0.470115	0.50219	5.00975	0.0816857	0.141846
CCDC148	1.55765	-2.98619	1.685	9.2302	0.00990118	0.0218319
CCDC149	83.3851	0.886808	0.186466	24.606	4.538e-06	1.61122e-05
CCDC15	28.3625	-0.379692	0.348465	2.0945	0.350901	0.472906
CCDC150	7.51227	-2.89517	0.809065	17.5855	0.000151827	0.000451605
CCDC151	2.81176	1.6099	1.10639	2.26005	0.323026	0.443982
CCDC152	9.00009	-2.39939	0.706326	16.9551	0.000208091	0.000607161
CCDC157	9.07224	0.393852	0.570568	2.73436	0.254825	0.368182
CCDC158	2.00133	-0.511441	1.1967	2.91312	0.233037	0.342629
CCDC159	10.0851	0.0902102	0.545605	1.90185	0.386383	0.509534
CCDC162P	1.44752	0.311902	1.4123	0.357197	0.836442	0.886662
CCDC163	3.20431	0.645009	0.979865	0.431504	0.805935	0.865681
CCDC167	34.6934	0.315631	0.288963	2.04011	0.360576	0.482989
CCDC168	5.09151	1.12163	0.805267	2.61585	0.27038	0.386228
CCDC17	2.04737	-0.663478	1.33807	1.33232	0.513679	0.630582
CCDC170	2.62099	-1.96349	1.10971	9.13287	0.0103949	0.0228259
CCDC171	13.8925	0.303076	0.442515	3.15656	0.20633	0.310015
CCDC173	1.75494	-3.02546	1.51122	5.52852	0.0630229	0.113385
CCDC174	72.4778	-0.0792528	0.197257	2.11288	0.347692	0.469676
CCDC18	90.3183	-0.295554	0.180379	5.53535	0.062808	0.113094
CCDC18.AS1	50.6316	-0.141195	0.25045	0.338505	0.844296	0.891681
CCDC181	3.13992	-1.84153	1.17087	3.71316	0.156206	0.245238
CCDC183	2.77772	-0.741555	1.06635	1.92055	0.382788	0.505735
CCDC183.AS1	4.38033	0.130433	0.790763	0.855541	0.651961	0.745657
CCDC184	3.23332	2.34246	1.10362	5.10119	0.0780353	0.136335
CCDC186	334.119	-0.574658	0.102291	41.3186	1.06608e-09	5.02644e-09
CCDC188	12.6942	0.495879	0.486384	1.25732	0.533306	0.647617
CCDC190	1.95167	-4.60168	1.54623	19.179	6.84438e-05	0.000213041
CCDC191	17.326	-1.72845	0.464975	18.891	7.90461e-05	0.000244151
CCDC200	3.4083	-0.607453	0.946432	1.5137	0.469142	0.588645
CCDC22	31.8827	0.614087	0.310036	4.30798	0.11602	0.191771
CCDC24	12.4336	-0.543012	0.507819	1.1863	0.552583	0.664351
CCDC25	234.466	-0.416773	0.115388	14.0573	0.000886131	0.00237185
CCDC28A	49.712	-0.233628	0.262609	7.42992	0.0243564	0.0492427
CCDC28B	14.9495	-0.918491	0.443635	14.6964	0.000643737	0.00175496
CCDC3	1.3633	-0.0788634	1.385	3.54107	0.170242	0.264177
CCDC30	3.27405	-0.244642	0.952501	1.16088	0.559653	0.670465
CCDC32	65.6074	-0.00504081	0.218535	0.0614558	0.969739	0.975712
CCDC34	42.0742	-1.33526	0.290102	23.1486	9.40473e-06	3.23187e-05
CCDC39	58.6997	-0.437182	0.238137	3.91133	0.14147	0.226285
CCDC40	14.3771	0.476496	0.438597	7.20203	0.027296	0.0544747
CCDC43	186.69	-0.253426	0.127908	4.08988	0.129388	0.209873
CCDC47	887.292	-0.0350198	0.067594	0.849066	0.654075	0.747516
CCDC50	960.167	-0.692049	0.0596266	200.234	3.30852e-44	4.42705e-43
CCDC51	33.669	-0.283388	0.300355	1.0508	0.591319	0.696502
CCDC57	68.2482	-0.119091	0.213127	3.15549	0.20644	0.310076
CCDC58	48.2147	-0.0671694	0.25523	0.076102	0.962664	0.970695
CCDC59	132.875	-0.229873	0.153182	7.37797	0.0249974	0.0504221
CCDC6	558.077	-0.182584	0.0767897	10.2533	0.00593656	0.0136348
CCDC61	9.30441	-0.897671	0.590276	2.58609	0.274434	0.390573
CCDC62	7.47305	1.71034	0.748412	5.88475	0.0527404	0.0971548
CCDC65	8.63691	-0.49511	0.616493	0.759816	0.683924	0.771413
CCDC66	64.1907	-0.316372	0.226378	2.14213	0.342643	0.464537
CCDC68	127.253	0.628589	0.157483	61.9728	3.48956e-14	2.09176e-13
CCDC69	7.07958	0.702433	0.657042	1.16931	0.557299	0.668543
CCDC7	54.3664	0.117345	0.236647	0.949427	0.622063	0.721689
CCDC71	41.8445	-0.417248	0.27022	3.0541	0.217176	0.323468
CCDC71L	1364.54	0.0969881	0.0537935	8.20301	0.0165478	0.034878
CCDC73	4.72475	0.121097	0.806241	0.189157	0.909757	0.935753
CCDC74A	9.84892	1.04307	0.529754	6.1352	0.0465327	0.0872437
CCDC74B	2.13257	-0.632072	1.14496	2.91541	0.23277	0.342271
CCDC77	30.7817	0.363971	0.30868	1.60004	0.44932	0.570174
CCDC78	6.88064	1.42805	0.696762	4.38356	0.111718	0.185834
CCDC8	12.8463	-0.149519	0.473272	0.232292	0.890345	0.922746
CCDC80	316.089	-2.00487	0.110315	653.055	1.55193e-142	5.79674e-141
CCDC81	16.0085	-4.4884	0.748725	97.5868	6.44609e-22	5.10808e-21
CCDC82	397.65	0.258567	0.0984099	14.4977	0.000711005	0.00192985
CCDC84	59.5137	0.209184	0.228705	1.58612	0.452457	0.572884
CCDC85A	1.07872	-3.75047	1.82725	9.35318	0.0093107	0.0206217
CCDC85B	147.874	-0.805352	0.150546	35.6183	1.84328e-08	7.9496e-08
CCDC85C	65.0603	-1.41311	0.226554	52.3244	4.34413e-12	2.33477e-11
CCDC86	100.168	0.453445	0.18171	19.6643	5.36973e-05	0.000168873
CCDC87	1.99839	0.867597	1.26461	0.566289	0.753411	0.827316
CCDC88A	1592.2	0.276198	0.053162	134.986	4.87726e-30	4.88251e-29
CCDC89	16.012	-0.248842	0.440058	0.879339	0.644249	0.739397
CCDC9	32.7521	0.217312	0.318338	3.11288	0.210885	0.315839
CCDC90B	307.207	-0.277018	0.103609	9.6766	0.00792049	0.0177623
CCDC91	171.274	0.171546	0.134494	2.17918	0.336354	0.458023
CCDC92	14.1274	0.193632	0.474279	0.842708	0.656158	0.749144
CCDC93	328.341	0.345348	0.0986843	14.2668	0.000798009	0.00214835
CCDC96	7.10548	-1.28006	0.710353	3.64792	0.161386	0.252225
CCDC97	47.6855	0.103514	0.265815	0.313252	0.855024	0.898098
CCDC9B	245.321	-0.622789	0.115243	59.7321	1.06987e-13	6.27653e-13
CCIN	2.52245	2.63758	1.24685	5.22356	0.0734038	0.129384
CCL2	295.869	-5.27918	0.218602	2000.28	0	0
CCL20	31.7659	6.8418	1.20742	157.816	5.379e-35	5.96748e-34
CCL26	1.56607	-1.79254	1.60603	1.71034	0.425211	0.547621
CCL28	1.93698	-3.83019	1.54599	6.65055	0.0359626	0.0695486
CCL7	7.01852	1.25708	0.668777	3.87049	0.144389	0.230236
CCM2	203.422	0.428094	0.123745	12.5583	0.00187503	0.00475345
CCNA2	119.173	-3.64038	0.236913	404.36	1.56442e-88	3.92187e-87
CCNB1	165.7	-3.12855	0.188934	361.729	2.82884e-79	6.24867e-78
CCNB1IP1	89.8957	-1.39839	0.199286	53.8023	2.07485e-12	1.13818e-11
CCNB2	56.9012	-4.46901	0.427108	209.054	4.02272e-46	5.55778e-45
CCNB3	0.994365	-0.512399	1.78866	1.82661	0.401197	0.524094
CCNC	509.157	-0.74776	0.0851406	78.6725	8.25076e-18	5.68114e-17
CCND1	10099.6	-1.12446	0.0320198	1408.76	1.23407e-306	1.0249e-304
CCND2	12.5961	-3.1116	0.673558	28.7686	5.66216e-07	2.18633e-06
CCND3	260.502	-0.0903517	0.113614	2.50225	0.286182	0.40368
CCNDBP1	355.058	0.178609	0.0984168	23.4904	7.92731e-06	2.74766e-05
CCNE1	33.2713	-0.617234	0.315151	5.97346	0.050452	0.093379
CCNE2	35.9329	-3.59879	0.428989	110.945	8.10393e-25	6.99205e-24
CCNF	35.8868	-2.10531	0.337064	45.8564	1.1026e-10	5.50596e-10
CCNG1	1528.49	-0.921828	0.0539487	417.887	1.80708e-91	4.6883e-90
CCNG2	496.841	0.658581	0.0891054	62.8565	2.24326e-14	1.35397e-13
CCNH	229.386	0.126611	0.121813	1.12663	0.569318	0.678161
CCNI	1227.05	0.369379	0.0594677	45.9033	1.07702e-10	5.38726e-10
CCNJ	81.823	0.740273	0.208984	14.5815	0.000681833	0.00185507
CCNK	275.509	-0.195606	0.110542	3.65102	0.161136	0.251887
CCNL1	544.615	-0.0673187	0.0805828	0.783879	0.675745	0.764596
CCNL2	1173.12	-0.0376203	0.0620954	2.07701	0.353984	0.476099
CCNO	3.15572	0.763424	1.01262	0.593706	0.743153	0.81926
CCNQ	74.4898	-0.665829	0.216427	10.4156	0.00547372	0.0126689
CCNT1	566.445	0.554649	0.0804604	70.0445	6.16629e-16	3.99425e-15
CCNT2	412.459	0.223575	0.0870001	8.92294	0.0115454	0.0251257
CCNT2.AS1	6.03732	-0.401906	0.723763	2.47063	0.290744	0.408178
CCNY	521.473	-0.224163	0.0818678	7.68033	0.0214901	0.0440226
CCNYL1	321.034	-0.206507	0.0986535	5.87073	0.0531115	0.0977656
CCNYL2	1.72351	-0.756918	1.26582	0.944722	0.623528	0.722758
CCP110	178.879	-0.887945	0.140318	42.7365	5.24661e-10	2.516e-09
CCPG1	168.953	0.65557	0.141754	44.5863	2.08072e-10	1.02356e-09
CCR10	3.64942	-0.679447	0.912711	0.575964	0.749775	0.824298
CCR7	1.60725	-0.753853	1.3457	0.736277	0.692021	0.778184
CCS	43.7948	0.0432693	0.276931	0.158641	0.923744	0.945431
CCSAP	100.147	-0.466605	0.184366	11.0348	0.00401632	0.00951955
CCSER2	444.799	-0.358098	0.091219	15.5925	0.000411282	0.00115601
CCT2	1245.82	0.203591	0.0577343	40.8406	1.35389e-09	6.34121e-09
CCT3	1278.42	0.0550347	0.0551863	7.30666	0.0259047	0.0520124
CCT4	1329.98	-0.0235828	0.0578742	28.7901	5.60167e-07	2.16466e-06
CCT5	1119.15	-0.21122	0.0607466	16.3096	0.00028736	0.00082453
CCT6A	1340.86	0.0536806	0.0550277	9.18813	0.0101116	0.0222506
CCT6B	6.02374	-0.778318	0.7456	1.38776	0.499633	0.617555
CCT6P1	13.0673	-0.698469	0.523894	2.72372	0.256183	0.369965
CCT6P3	9.84607	-0.752176	0.556095	1.89077	0.388531	0.511549
CCT7	840.183	0.0989879	0.0653551	19.3849	6.17487e-05	0.000193132
CCT8	1200.4	-0.0705136	0.0583149	13.4471	0.00120226	0.00315163
CCZ1	68.2464	0.0494971	0.211415	2.20056	0.332777	0.454158
CCZ1B	68.27	0.0278275	0.207247	0.339811	0.843744	0.891387
CCZ1P.OR7E38P	18.8471	-0.143834	0.401464	0.34665	0.840864	0.88976
CD109	2908.18	-0.144745	0.0470862	293.095	2.26578e-64	4.17904e-63
CD14	0.988223	-0.817181	1.63482	0.42053	0.810369	0.868611
CD151	1474.13	0.410433	0.0567852	55.7771	7.72941e-13	4.34097e-12
CD160	4.29982	-0.261784	0.815266	0.157402	0.924316	0.945756
CD163L1	41.1953	0.905651	0.284344	14.6596	0.000655707	0.00178595
CD164	4599.11	0.455437	0.0511717	89.694	3.33573e-20	2.50196e-19
CD177	2.69292	-0.672895	1.06979	0.454213	0.796836	0.859163
CD226	1.4037	0.445408	1.41853	0.241787	0.886129	0.91953
CD248	738.427	0.43824	0.0701289	182.58	2.25552e-40	2.80122e-39
CD27	1.10259	-0.315072	1.63686	0.202073	0.9039	0.931728
CD27.AS1	31.6404	-1.39157	0.325812	28.9663	5.12926e-07	1.98779e-06
CD274	478.034	0.277208	0.0981718	264.323	4.00835e-58	6.71038e-57
CD276	777.831	1.00627	0.0876681	140.936	2.48969e-31	2.56314e-30
CD2AP	440.318	0.229078	0.0910798	26.6586	1.62618e-06	6.00764e-06
CD2BP2	163.643	0.0633173	0.140938	0.203009	0.903477	0.931421
CD302	2.74982	-1.24793	1.11041	1.32626	0.515236	0.632013
CD320	65.9117	0.0630564	0.211111	0.189977	0.909384	0.935609
CD34	0.951555	-3.4175	1.8225	6.06111	0.0482887	0.0899913
CD36	3.35397	-1.99026	1.07621	4.6768	0.0964818	0.164032
CD37	2.32173	2.09343	1.23948	3.54014	0.170321	0.264273
CD3EAP	18.3081	-0.155793	0.444935	0.961682	0.618263	0.718504
CD40	1.30593	-1.1013	1.50799	1.43405	0.488202	0.607332
CD44	11090.8	0.143991	0.03521	25.1657	3.43036e-06	1.2294e-05
CD46	1666.61	0.601853	0.0535437	180.068	7.92066e-40	9.73933e-39
CD47	673.747	-0.342991	0.0700906	36.3855	1.25601e-08	5.47722e-08
CD55	424.585	1.69444	0.100203	420.947	3.91221e-92	1.02392e-90
CD58	98.5993	0.2627	0.172609	3.20548	0.201345	0.304203
CD59	7171.9	0.734718	0.0347096	639.799	1.17346e-139	4.30731e-138
CD63	4298.55	0.912742	0.0361966	653.264	1.39825e-142	5.23587e-141
CD68	373.773	2.15264	0.105291	447.213	7.74322e-98	2.09673e-96
[truncated: 12,915 more rows]

## Sheet: Supplementary Table 1D
Gene	Sen1	Sen2	Sen3	Sen siMir31hg 1	Sen siMir31hg 2	Sen siMir31hg 3
[truncated: 40 more rows]
