# Supplementary material for: The long non-coding RNA MIR31HG regulates the senescence associated secretory phenotype
Source: Nat Commun. 2021 Apr 28;12:2459. doi: 10.1038/s41467-021-22746-4 (PMC8080841; doi:10.1038/s41467-021-22746-4)
Supplement: Supplementary file 6 — Supplementary Data 2 [file 41467_2021_22746_MOESM6_ESM.xlsx]

## Sheet: Suppl. Table 2A
Gene.names	ID	Sen siMIR31HG_vs_Sen_ratio	Sen siMIR31HG_vs_Sen_p.val	Control_vs_Sen_ratio	Control_vs_Sen_p.val	Control_centered	Sen_centered	Sen siMIR31HG_centered
EEF1B2	P24534	-2.64	0.0149558	-1.68	0.089431	-0.241	1.44	-1.2
FLNB	O75369	-2.56	0.00216855	-2.04	0.00840613	-0.504	1.53	-1.03
SERPINB8	P50452	-2.31	6.45901e-05	-0.446	0.221907	0.474	0.92	-1.39	s
IL6	P05231	-1.97	0.00243553	-4.74	2.80891e-06	-2.5	2.24	0.269
EIF4H	Q15056	-1.88	0.00335064	-1.64	0.00728174	-0.47	1.17	-0.705
SYNCRIP	O60506	-1.61	0.00168178	-0.195	0.611763	0.407	0.602	-1.01
LASP1	Q14847	-1.57	0.014791	-1.1	0.065497	-0.209	0.887	-0.678
CCT2	P78371	-1.56	0.0156858	-1.01	0.0888753	-0.151	0.856	-0.706
XRCC6	P12956	-1.37	0.000577227	-0.409	0.162542	0.184	0.593	-0.778
PRKAR1A	P10644	-1.32	0.00588326	-1.28	0.00703474	-0.412	0.866	-0.454
CXCL1	P09341	-1.27	0.0011279	-1.87	6.37445e-05	-0.822	1.04	-0.222
PPIC	P45877	-1.26	0.00272439	0.204	0.532012	0.557	0.353	-0.91
COTL1	Q14019	-1.24	0.159534	0.00203	0.998054	0.414	0.412	-0.827
LDLR	P01130	-1.2	0.050774	-0.612	0.281062	-0.00881	0.604	-0.595
CCT6A	P40227	-1.15	0.0183783	-0.958	0.0408617	-0.255	0.703	-0.448
TUBA1B	P68363	-1.14	0.014317	-1.9	0.000630005	-0.89	1.01	-0.124
ERP29	P30040	-1.13	0.0209205	-0.589	0.180724	-0.0167	0.573	-0.556
PSMA5	P28066	-1.11	0.0224936	-1.15	0.0194762	-0.394	0.753	-0.359
NPEPPS	P55786	-1.07	0.00530481	-1.08	0.00489968	-0.366	0.718	-0.352
PRCP	P42785	-1.06	0.0117016	0.66	0.0829181	0.794	0.134	-0.927
HNRNPA1	P09651	-1.05	0.0454463	-0.757	0.130161	-0.154	0.603	-0.449
RPLP0	P05388	-1.05	0.157214	-0.658	0.358927	-0.0891	0.568	-0.479
CFL2	Q9Y281	-1.04	0.0845662	-0.822	0.160805	-0.201	0.621	-0.42
RPSA	P08865	-1.03	0.00954531	-2.18	5.67074e-05	-1.11	1.07	0.0436
PDLIM7	Q9NR12	-1.02	0.0123014	-0.138	0.684833	0.248	0.386	-0.634
S100A10	P60903	-1.02	0.00526498	-1.06	0.00420081	-0.367	0.693	-0.327
SIL1	Q9H173	-0.998	0.0821344	-0.16	0.7624	0.226	0.386	-0.612
CAP1	Q01518	-0.919	0.0156853	-2.33	3.04291e-05	-1.25	1.08	0.163
RPS20	P60866	-0.909	0.0431608	-1.7	0.00164867	-0.828	0.869	-0.0409
HSPB1	P04792	-0.905	0.00135474	-0.169	0.421688	0.189	0.358	-0.547
UGDH	O60701	-0.894	0.0100334	-1.65	0.000189002	-0.799	0.847	-0.0476
ZYX	Q15942	-0.893	0.0340553	0.0377	0.918852	0.323	0.285	-0.608
MDH1	P40925	-0.887	0.0282362	-0.752	0.0544696	-0.206	0.546	-0.341
C3	P01024	-0.868	0.0812591	0.495	0.293115	0.62	0.124	-0.744
LGALS3BP	Q08380	-0.86	0.109555	1.76	0.00523522	1.46	-0.3	-1.16
TUBB4B	P68371	-0.847	0.273441	-0.906	0.243526	-0.322	0.584	-0.263
PSMA1	P25786	-0.821	0.293362	-1.69	0.0461244	-0.855	0.838	0.0171
Sep/02	Q15019	-0.796	0.0349576	-0.903	0.0199995	-0.337	0.566	-0.229
G6PD	P11413	-0.784	0.0202209	-1.34	0.000884113	-0.634	0.709	-0.0749
SERPINB6	P35237	-0.779	0.00425309	-0.538	0.0285043	-0.0989	0.439	-0.34
PCMT1	P22061	-0.778	0.174183	-0.896	0.123224	-0.338	0.558	-0.22
FAM129B	Q96TA1	-0.774	0.140843	-0.53	0.298091	-0.0954	0.435	-0.339
HYOU1	Q9Y4L1	-0.765	0.0466484	-0.187	0.589379	0.13	0.317	-0.448
PSAT1	Q9Y617	-0.754	0.0416371	-0.0716	0.827694	0.204	0.275	-0.479
DBI	P07108	-0.721	0.129917	-0.381	0.402079	-0.0138	0.367	-0.354
EEF1D	P29692	-0.721	0.203488	-1.68	0.0106626	-0.876	0.799	0.0776
STIP1	P31948	-0.719	0.0356231	-1.43	0.000789412	-0.711	0.715	-0.00428
TXNRD1	Q16881	-0.719	0.189833	0.0348	0.946863	0.263	0.228	-0.491
PEA15	Q15121	-0.715	0.11243	-1.07	0.0264064	-0.478	0.596	-0.119
GDI2	P50395	-0.705	0.0126002	-0.375	0.135022	-0.015	0.36	-0.345
DCTN2	Q13561	-0.701	0.0104439	-0.951	0.00171973	-0.401	0.551	-0.15
PYGB	P11216	-0.674	0.0280358	-1.18	0.00123589	-0.563	0.618	-0.0553
PTRF	Q6NZI2	-0.67	0.080436	-0.723	0.0622112	-0.259	0.464	-0.205
HNRNPD	Q14103	-0.666	0.0535099	-0.973	0.0098712	-0.427	0.546	-0.12
FKBP10	Q96AY3	-0.662	0.261962	1.82	0.00904569	1.43	-0.385	-1.05
LMAN1	P49257	-0.65	0.221413	0.245	0.632987	0.38	0.135	-0.515
MDH2	P40926	-0.635	0.0468408	1.15	0.00223218	0.981	-0.173	-0.808
SERPINH1	P50454	-0.634	0.0249821	1.13	0.000918946	0.966	-0.166	-0.8
CALD1	Q05682	-0.629	0.0615222	1.07	0.00533316	0.921	-0.146	-0.775
MTPN	P58546	-0.628	0.225788	-1.47	0.0132638	-0.774	0.701	0.0727
RDX	P35241	-0.619	0.0417828	0.0788	0.770763	0.259	0.18	-0.439
CBR1	P16152	-0.613	0.20094	-0.253	0.583722	0.0357	0.289	-0.324
NAP1L1	P55209	-0.604	0.0315031	-1.89	1.84625e-05	-1.06	0.833	0.229
RNASE4	P34096	-0.601	0.0768818	0.931	0.012587	0.821	-0.11	-0.711
MAP1B	P46821	-0.595	0.0608511	-1.15	0.00241015	-0.567	0.581	-0.0141
RPS28	P62857	-0.593	0.382169	-1.39	0.0583971	-0.731	0.662	0.069
MAP4	P27816	-0.582	0.0506616	-0.0606	0.82051	0.154	0.214	-0.368
PABPC1	P11940	-0.58	0.0308627	-1.04	0.00120735	-0.503	0.541	-0.0387
ENPP2	Q13822	-0.578	0.0492443	4	4.76484e-08	2.86	-1.14	-1.72
EEF1G	P26641	-0.557	0.0611994	-0.424	0.138592	-0.0971	0.327	-0.23
TAGLN2	P37802	-0.555	0.14029	0.185	0.603677	0.309	0.123	-0.432
DYNC1H1	Q14204	-0.553	0.162567	-0.798	0.0555938	-0.347	0.45	-0.103
ERAP1	Q9NZ08	-0.55	0.228558	-0.568	0.214811	-0.196	0.373	-0.177
MVP	Q14764	-0.549	0.0965921	-3.33	9.41999e-07	-2.04	1.29	0.744
TIMP3	P35625	-0.546	0.473348	-1.75	0.0393136	-0.983	0.764	0.219
PTX3	P26022	-0.544	0.0146934	2.55	1.32117e-07	1.88	-0.668	-1.21
TUBB	P07437	-0.541	0.122319	-1.37	0.00179626	-0.733	0.637	0.096
IQGAP1	P46940	-0.538	0.103234	-1.49	0.00064645	-0.813	0.675	0.138
SPTBN1	Q01082	-0.533	0.109637	-1.06	0.00617613	-0.528	0.53	-0.00236
HSP90AA1	P07900	-0.532	0.206962	-1.5	0.00368759	-0.825	0.678	0.147
PSMB5	P28074	-0.525	0.275304	-0.268	0.568025	-0.00379	0.265	-0.261
NPC2	P61916	-0.524	0.549667	1	0.263246	0.844	-0.16	-0.684
KPNB1	Q14974	-0.522	0.393965	-0.242	0.688179	0.0127	0.255	-0.268
GNB1	P62873	-0.518	0.0672421	-0.0496	0.847213	0.14	0.189	-0.329
ARPC1B	O15143	-0.516	0.13359	-0.0415	0.897903	0.145	0.186	-0.33
TUBA1A	Q71U36	-0.512	0.0515044	-1.43	0.000126147	-0.783	0.647	0.136
ICAM1	P05362	-0.511	0.0769302	-6.11	1.00955e-09	-3.9	2.21	1.7
RGMB	Q6NW40	-0.508	0.0841544	3.71	1.21201e-07	2.64	-1.07	-1.57
RPL5	P46777	-0.506	0.0861928	-0.638	0.037805	-0.257	0.381	-0.125
ATP6AP2	O75787	-0.495	0.574661	0.326	0.710486	0.382	0.0564	-0.439
PRDX5	P30044	-0.491	0.0286303	-1.04	0.000338864	-0.53	0.51	0.0193
HSPA1B	P0DMV9	-0.487	0.0716054	-0.58	0.0376946	-0.224	0.355	-0.131
CALM1	P62158	-0.484	0.0976759	-0.0497	0.854119	0.128	0.178	-0.306
UBA1	P22314	-0.483	0.237226	-0.69	0.103402	-0.299	0.391	-0.092
GPI	P06744	-0.466	0.0882957	-0.0248	0.921341	0.139	0.164	-0.302
NFASC	O94856	-0.463	0.0989067	0.242	0.361554	0.316	0.0735	-0.389
MYL6	P60660	-0.461	0.0532445	-0.874	0.00211823	-0.429	0.445	-0.0159
PDIA4	P13667	-0.459	0.468516	-1.28	0.0628515	-0.702	0.581	0.121
SND1	Q7KZF4	-0.452	0.333696	-0.281	0.541921	-0.0365	0.244	-0.208
ADAMTSL1	Q8N6G6	-0.448	0.395139	1.58	0.0110573	1.21	-0.379	-0.826
GSTO1	P78417	-0.447	0.0844826	-1.25	0.000380213	-0.683	0.565	0.118
IGF2R	P11717	-0.446	0.0799102	-3.24	1.10268e-07	-2.01	1.23	0.782
SFRP1	Q8N474	-0.445	0.0728541	1.54	5.07158e-05	1.18	-0.366	-0.811
RPS3	P23396	-0.439	0.218576	-1.31	0.00323234	-0.724	0.582	0.142
PRDX4	Q13162	-0.427	0.474679	-1.28	0.0518991	-0.708	0.568	0.141
TAGLN	Q01995	-0.424	0.170337	1.01	0.00591993	0.814	-0.195	-0.619
CEMIP	Q8WUJ3	-0.418	0.478511	-1.7	0.0143392	-0.992	0.705	0.287
EIF5A	P63241	-0.416	0.109809	-0.78	0.00856261	-0.381	0.399	-0.0175
GNB2L1	P63244	-0.415	0.060929	-0.718	0.00473696	-0.34	0.378	-0.0378
TWSG1	Q9GZX9	-0.408	0.376725	-0.373	0.418113	-0.112	0.26	-0.148
GOT1	P17174	-0.406	0.381354	0.59	0.213066	0.528	-0.0614	-0.467
MMP3	P08254	-0.402	0.260695	-2.9	8.99917e-06	-1.8	1.1	0.697
ARCN1	P48444	-0.399	0.281877	-0.744	0.0607683	-0.363	0.381	-0.0179
NES	P48681	-0.398	0.218752	-0.68	0.0499809	-0.32	0.359	-0.0391
HNRNPA2B1	P22626	-0.397	0.300307	-0.741	0.0694649	-0.362	0.379	-0.0174
PLAUR	Q03405	-0.395	0.353381	-1.3	0.00990777	-0.737	0.566	0.171
ANXA1	P04083	-0.393	0.319091	-1.75	0.000998459	-1.04	0.715	0.323
WDR1	O75083	-0.392	0.120284	-0.218	0.366296	-0.0145	0.203	-0.189
CALR	P27797	-0.39	0.217754	-0.64	0.0571762	-0.296	0.343	-0.0468
DPYSL2	Q16555	-0.389	0.15191	-0.304	0.253299	-0.0728	0.231	-0.158
C1S	P09871	-0.388	0.637562	3.85	0.000820169	2.69	-1.15	-1.54
Sep/09	Q9UHD8	-0.387	0.12986	-0.418	0.105299	-0.15	0.269	-0.119
GSTP1	P09211	-0.386	0.0579998	-0.176	0.350221	0.0114	0.187	-0.199
MEGF6	O75095	-0.385	0.214303	0.0145	0.961097	0.138	0.124	-0.262
FLNC	Q14315	-0.384	0.06839	-0.295	0.147452	-0.0684	0.226	-0.158
ARPC3	O15145	-0.38	0.228834	-0.0693	0.819405	0.0805	0.15	-0.23
OTUB1	Q96FW1	-0.377	0.109287	-0.55	0.0284836	-0.241	0.309	-0.0676
CCT8	P50990	-0.374	0.202937	-0.973	0.00565422	-0.524	0.449	0.0753
TCP1	P17987	-0.373	0.268806	-1.15	0.00508934	-0.644	0.508	0.135
MASP1	P48740	-0.372	0.573038	3.73	0.00020249	2.61	-1.12	-1.49
LAMA5	O15230	-0.37	0.154543	3.87	3.46334e-08	2.7	-1.17	-1.54
RPL35A	P18077	-0.367	0.46839	-0.426	0.402573	-0.162	0.264	-0.103
HNRNPK	P61978	-0.352	0.253079	-2.75	3.90813e-06	-1.71	1.03	0.682
RPS27A	P62979	-0.351	0.130319	-0.602	0.0185454	-0.284	0.318	-0.0335
PGRMC1	O00264	-0.349	0.309935	2.73	1.1228e-05	1.94	-0.793	-1.14
TNC	P24821	-0.349	0.0952715	-1.55	1.28325e-05	-0.92	0.634	0.286
TMSB10	P63313	-0.345	0.269115	-0.628	0.059633	-0.304	0.324	-0.0203
MYH9	P35579	-0.341	0.11571	-0.426	0.0573539	-0.17	0.256	-0.0854
NRP2	O60462	-0.34	0.300867	-2.51	1.56575e-05	-1.56	0.95	0.61
FBLN5	Q9UBX5	-0.34	0.271624	0.752	0.0285108	0.614	-0.137	-0.477
PDGFRA	P16234	-0.339	0.148595	-0.378	0.1118	-0.139	0.239	-0.1
CMPK1	P30085	-0.337	0.458792	-0.317	0.485211	-0.0989	0.218	-0.119
ACTN1	P12814	-0.336	0.154932	0.164	0.467745	0.222	0.0572	-0.279
RPL10A	P62906	-0.336	0.124329	-0.704	0.00595685	-0.357	0.347	0.0104
USP5	P45974	-0.336	0.271221	-0.0747	0.800489	0.0621	0.137	-0.199
CCT3	P49368	-0.331	0.226034	-0.993	0.00337817	-0.552	0.441	0.11
HSPA8	P11142	-0.331	0.193232	-0.758	0.0101338	-0.395	0.363	0.0318
LIF	P15018	-0.326	0.289073	-4.31	7.5803e-08	-2.76	1.54	1.22
DBN1	Q16643	-0.321	0.227077	-0.823	0.00851366	-0.441	0.381	0.0602
ST13	P50502	-0.32	0.341799	-0.513	0.141236	-0.235	0.278	-0.0422
CAPZA1	P52907	-0.317	0.284355	-0.459	0.133434	-0.2	0.259	-0.0585
HSP90B1	P14625	-0.314	0.43778	-0.465	0.260261	-0.205	0.26	-0.0547
VCL	P18206	-0.314	0.120964	0.29	0.148685	0.298	0.00809	-0.306
NCL	P19338	-0.312	0.673253	-1.6	0.0515689	-0.962	0.637	0.325
PA2G4	Q9UQ80	-0.312	0.299474	-1.17	0.00232782	-0.678	0.495	0.183
MAT2A	P31153	-0.31	0.342689	-1.46	0.000971168	-0.871	0.59	0.281
RPL11	P62913	-0.308	0.373568	-1.01	0.0126412	-0.573	0.441	0.132
YWHAQ	P27348	-0.3	0.366123	-0.254	0.442209	-0.069	0.185	-0.116
CLTC	Q00610	-0.293	0.32177	-0.664	0.0407805	-0.345	0.319	0.0259
GDF15	Q99988	-0.285	0.344672	-3.4	5.62641e-07	-2.17	1.23	0.943
CCT5	P48643	-0.275	0.239765	-0.0558	0.804769	0.0546	0.11	-0.165
CCT7	Q99832	-0.275	0.460331	-0.527	0.172332	-0.26	0.267	-0.00743
COL11A1	P12107	-0.275	0.394963	1.44	0.00102301	1.05	-0.39	-0.665
RPS18	P62269	-0.275	0.420107	-0.606	0.0949505	-0.312	0.294	0.0185
VCP	P55072	-0.275	0.344468	-0.969	0.00615464	-0.554	0.414	0.14
PKM	P14618	-0.274	0.165955	-0.65	0.00566708	-0.342	0.308	0.034
RPLP2	P05387	-0.273	0.279584	-0.646	0.0229593	-0.339	0.306	0.0332
RRBP1	Q9P2E9	-0.268	0.440343	-0.537	0.139094	-0.269	0.268	0.00051
C1RL	Q9NZP8	-0.263	0.390833	0.0623	0.835633	0.129	0.0668	-0.196
TNFRSF12A	Q9NP84	-0.263	0.749593	-1.44	0.104341	-0.872	0.567	0.304
CXCL8	P10145	-0.261	0.332887	-3.99	4.84843e-08	-2.57	1.42	1.16
VIT	Q6UXI7	-0.258	0.37106	2.62	3.90725e-06	1.83	-0.786	-1.04
AKR1B1	P15121	-0.255	0.325565	0.189	0.462732	0.211	0.0223	-0.233
ACPP	P15309	-0.254	0.417287	-4.87	3.29339e-08	-3.16	1.71	1.45
PDCD6IP	Q8WUM4	-0.254	0.422003	-0.0101	0.974126	0.078	0.088	-0.166
CTSC	P53634	-0.252	0.482863	0.754	0.0554809	0.586	-0.167	-0.419
CORO1C	Q9ULV4	-0.251	0.300718	0.789	0.00689811	0.61	-0.179	-0.43
ANXA2	P07355	-0.249	0.275239	-0.286	0.21475	-0.108	0.178	-0.0706
CSRP1	P21291	-0.248	0.313774	0.519	0.0516246	0.429	-0.0904	-0.338
TPM3	P06753	-0.247	0.298934	0.221	0.349602	0.23	0.00862	-0.238
HSP90AB1	P08238	-0.244	0.38023	-1.5	0.000254622	-0.922	0.583	0.339
RPL12	P30050	-0.244	0.293265	-0.808	0.00471378	-0.457	0.351	0.106
ENO1	P06733	-0.243	0.23137	-0.432	0.0479827	-0.207	0.225	-0.0182
FLNA	P21333	-0.241	0.274467	0.161	0.458467	0.188	0.0269	-0.215
PLS3	P13797	-0.24	0.362312	0.314	0.240458	0.289	-0.0247	-0.265
ANPEP	P15144	-0.238	0.306619	-1.29	0.000199442	-0.782	0.51	0.272
RPL7A	P62424	-0.236	0.571994	-0.787	0.0817167	-0.446	0.341	0.105
PRDX6	P30041	-0.235	0.318318	0.119	0.605647	0.157	0.0385	-0.196
TLN1	Q9Y490	-0.233	0.353971	-0.965	0.00264811	-0.566	0.399	0.167
ADAM9	Q13443	-0.229	0.419223	0.774	0.0180435	0.592	-0.182	-0.411
TFPI	P10646	-0.218	0.396618	-0.673	0.0216234	-0.376	0.297	0.0794
ADAM10	O14672	-0.216	0.457854	0.359	0.229681	0.311	-0.0475	-0.264
PURA	Q00577	-0.216	0.367263	-0.138	0.55854	-0.0202	0.118	-0.098
PSMB1	P20618	-0.215	0.264854	-0.225	0.245253	-0.0783	0.147	-0.0686
RPL13	P26373	-0.213	0.696306	-0.16	0.769282	-0.0356	0.124	-0.0889
NID2	Q14112	-0.209	0.455748	1.81	6.97877e-05	1.28	-0.533	-0.742
CNDP2	Q96KP4	-0.208	0.542966	0.251	0.464486	0.237	-0.0144	-0.222
PSMA7	O14818	-0.205	0.379272	-0.333	0.167372	-0.153	0.179	-0.0259
HSPA5	P11021	-0.204	0.292075	-0.469	0.0293891	-0.245	0.224	0.0203
PRKCSH	P14314	-0.203	0.61668	0.682	0.114793	0.522	-0.16	-0.363
METRNL	Q641Q3	-0.2	0.690526	-0.726	0.16972	-0.417	0.309	0.108
YWHAE	P62258	-0.2	0.496139	0.669	0.0411629	0.513	-0.156	-0.357
CYR61	O00622	-0.198	0.780884	1.18	0.12052	0.854	-0.328	-0.526
NME2	P22392	-0.198	0.470535	-0.293	0.293815	-0.129	0.164	-0.0344
EEF2	P13639	-0.197	0.445536	-0.967	0.00330693	-0.579	0.388	0.191
P4HB	P07237	-0.197	0.33742	-0.315	0.138133	-0.145	0.171	-0.026
CFL1	P23528	-0.195	0.484431	-0.116	0.673506	-0.0126	0.104	-0.091
SLC3A2	P08195	-0.194	0.677214	-0.239	0.609727	-0.0944	0.144	-0.0499
PFN1	P07737	-0.193	0.389936	-0.145	0.514632	-0.0323	0.113	-0.0803
ALDOA	P04075	-0.192	0.408079	-0.222	0.341001	-0.0841	0.138	-0.0538
MXRA5	Q9NR99	-0.188	0.536545	4.29	8.57183e-08	2.92	-1.37	-1.55
GALNT2	Q10471	-0.186	0.756409	1.85	0.0105418	1.3	-0.556	-0.742
IL6ST	P40189	-0.186	0.507581	0.448	0.129257	0.36	-0.0874	-0.273
TALDO1	P37837	-0.186	0.449214	-0.572	0.0370982	-0.319	0.253	0.0665
CLU	P10909	-0.184	0.643424	4.63	5.0659e-07	3.15	-1.48	-1.67
ACTR3	P61158	-0.182	0.394718	-0.138	0.515825	-0.0312	0.107	-0.0755
EIF4A1	P60842	-0.182	0.388432	-0.478	0.0405389	-0.258	0.22	0.0379
PEBP1	P30086	-0.179	0.414658	-0.13	0.550502	-0.027	0.103	-0.0762
PGD	P52209	-0.179	0.637933	-0.899	0.0365736	-0.539	0.359	0.18
PPIA	P62937	-0.175	0.415191	-0.208	0.337093	-0.0801	0.127	-0.0474
LOX	P28300	-0.173	0.4508	2.3	1.72816e-06	1.59	-0.71	-0.883
RPS26P11	Q5JNZ5	-0.172	0.67034	-0.438	0.291837	-0.234	0.203	0.0311
LMNA	P02545	-0.166	0.562395	-0.0601	0.832857	0.0154	0.0755	-0.0909
XRCC5	P13010	-0.166	0.596403	-1.51	0.000635094	-0.954	0.56	0.394
HAPLN1	P10915	-0.161	0.645875	1.23	0.00529063	0.872	-0.355	-0.517
HMGB1	P09429	-0.161	0.484883	-0.976	0.00151936	-0.597	0.379	0.218
UCHL1	P09936	-0.16	0.490768	0.0721	0.753102	0.101	0.0292	-0.13
COL4A2	P08572	-0.159	0.728162	2.83	0.000106999	1.94	-0.89	-1.05
ITGA3	P26006	-0.158	0.705697	0.153	0.713456	0.155	0.00146	-0.156
RCN1	Q15293	-0.157	0.44333	0.543	0.0210603	0.414	-0.129	-0.286
ATIC	P31939	-0.155	0.466147	-0.855	0.00209248	-0.519	0.337	0.182
YWHAB	P31946	-0.148	0.639602	0.642	0.0643346	0.477	-0.164	-0.313
YWHAG	P61981	-0.148	0.601757	-0.214	0.452753	-0.0936	0.121	-0.0271
LGALS1	P09382	-0.143	0.4816	-0.171	0.402194	-0.0665	0.105	-0.0383
TPM4	P67936	-0.143	0.485767	0.716	0.00505611	0.525	-0.191	-0.334
CDCP1	Q9H5V8	-0.142	0.689726	-1.52	0.00153058	-0.963	0.552	0.411
RPL10	P27635	-0.142	0.767385	-0.215	0.655922	-0.096	0.119	-0.0232
ITGA2	P17301	-0.136	0.526555	-0.977	0.000955396	-0.606	0.371	0.235
EEF1A1P5	Q5VTE0	-0.132	0.71696	-1.53	0.00164614	-0.978	0.555	0.423
TPI1	P60174	-0.132	0.47467	-0.228	0.227846	-0.108	0.12	-0.0118
GLO1	Q04760	-0.131	0.807249	-0.86	0.132637	-0.53	0.33	0.199
MIF	P14174	-0.131	0.729198	0.114	0.764086	0.12	0.00585	-0.125
PDIA3	P30101	-0.131	0.533823	-0.195	0.360005	-0.0866	0.109	-0.0223
COL15A1	P39059	-0.128	0.742514	2.58	5.99583e-05	1.76	-0.818	-0.946
DSTN	P60981	-0.126	0.741238	-0.111	0.771288	-0.032	0.0793	-0.0472
LOXL4	Q96JB6	-0.126	0.732362	0.656	0.0978336	0.479	-0.177	-0.303
PSMD6	Q15008	-0.126	0.728417	-0.149	0.682302	-0.0572	0.0916	-0.0344
CTSL	P07711	-0.125	0.744585	-2.83	2.57189e-05	-1.84	0.984	0.859
CSTB	P04080	-0.124	0.702987	-0.199	0.54168	-0.0917	0.108	-0.0161
SOD1	P00441	-0.122	0.503648	0.0399	0.825805	0.0674	0.0275	-0.095
MMP19	Q99542	-0.119	0.743224	-1.26	0.0057078	-0.8	0.46	0.34
RPL15	P61313	-0.118	0.658084	0.0528	0.842117	0.0745	0.0217	-0.0962
AHNAK	Q09666	-0.109	0.649868	-0.11	0.645473	-0.0373	0.0731	-0.0358
ACLY	P53396	-0.108	0.705047	-0.22	0.44707	-0.111	0.11	0.0012
HMGA1	P17096	-0.106	0.762692	-1.82	0.000406568	-1.18	0.643	0.537
PPIB	P23284	-0.105	0.59719	-0.263	0.202114	-0.141	0.123	0.0178
EZR	P15311	-0.102	0.788866	1.35	0.00484065	0.934	-0.416	-0.518
CORO1B	Q9BR76	-0.101	0.695285	0.00595	0.981604	0.0378	0.0318	-0.0696
PLAT	P00750	-0.101	0.617238	-0.729	0.00426773	-0.452	0.277	0.176
CLSTN3	Q9BQT9	-0.0999	0.801064	0.616	0.142636	0.444	-0.172	-0.272
HSPH1	Q92598	-0.0986	0.75887	-1.16	0.00433167	-0.743	0.421	0.322
NBL1	P41271	-0.0908	0.775049	0.689	0.0513134	0.489	-0.199	-0.29
ANXA5	P08758	-0.0823	0.776501	0.191	0.51465	0.155	-0.0362	-0.118
DDX39B	Q13838	-0.0772	0.872776	-0.203	0.674506	-0.11	0.0935	0.0163
PLEC	Q15149	-0.0771	0.691767	-0.192	0.333378	-0.102	0.0898	0.0127
HSPA4	P34932	-0.0766	0.752434	-0.433	0.0979156	-0.263	0.17	0.0934
MYDGF	Q969H8	-0.0761	0.739691	0.497	0.0510734	0.357	-0.14	-0.216
HS3ST3B1	Q9Y662	-0.076	0.776987	-3.6	1.44766e-07	-2.38	1.23	1.15
STC2	O76061	-0.0753	0.851616	4.55	6.77227e-07	3.06	-1.49	-1.57
ACTB	P60709	-0.072	0.705536	0.0763	0.688928	0.0748	-0.00144	-0.0734
YWHAZ	P63104	-0.0686	0.775063	0.409	0.112455	0.295	-0.113	-0.182
IDH1	O75874	-0.0683	0.78522	-0.814	0.00811735	-0.52	0.294	0.226
ARHGDIA	P52565	-0.0668	0.762877	-0.179	0.426289	-0.097	0.0819	0.0151
LDHA	P00338	-0.0653	0.772576	0.434	0.0779076	0.311	-0.123	-0.188
RPL6	Q02878	-0.064	0.847177	-0.63	0.0814658	-0.399	0.231	0.167
PRDX1	Q06830	-0.0636	0.778953	-0.424	0.0847643	-0.261	0.162	0.0989
SH3BGRL3	Q9H299	-0.0594	0.901863	-0.258	0.594876	-0.152	0.106	0.0465
GAS6	Q14393	-0.0535	0.900598	4.84	6.77632e-07	3.25	-1.6	-1.65
PGAM1	P18669	-0.0506	0.829382	0.123	0.603811	0.0986	-0.024	-0.0746
CTSS	P25774	-0.0499	0.890008	-1.9	0.00036058	-1.25	0.65	0.601
SRGN	P10124	-0.0459	0.851424	0.391	0.133525	0.276	-0.115	-0.161
NAMPT	P43490	-0.0371	0.936966	-1.32	0.0174544	-0.865	0.451	0.414
TKT	P29401	-0.0371	0.8687	-0.668	0.012869	-0.433	0.235	0.198
THBS1	P07996	-0.0367	0.857	2.73	1.46844e-07	1.83	-0.898	-0.934
PDIA6	Q15084	-0.0367	0.872668	-0.0701	0.75986	-0.0345	0.0356	-0.00109
ITGB1	P05556	-0.0361	0.89005	-0.586	0.0455546	-0.379	0.207	0.171
PCBP1	Q15365	-0.0351	0.888624	-0.663	0.0228694	-0.43	0.233	0.197
RCN3	Q96D15	-0.0337	0.909157	0.209	0.486142	0.15	-0.0583	-0.0921
SEMA5A	Q13591	-0.0336	0.897475	0.597	0.0421274	0.409	-0.188	-0.221
TOR1B	O14657	-0.0293	0.93579	-0.653	0.0963022	-0.426	0.227	0.198
TXNDC17	Q9BRA2	-0.0263	0.964494	-1.26	0.055159	-0.831	0.429	0.402
SRPX2	O60687	-0.0247	0.905379	-0.16	0.45	-0.0981	0.0614	0.0367
SERPINE2	P07093	-0.0236	0.914429	3.35	4.65371e-08	2.24	-1.11	-1.13
RPS2	P15880	-0.0213	0.950012	-0.687	0.0659023	-0.451	0.236	0.215
ERH	P84090	-0.0188	0.964187	-0.233	0.581178	-0.149	0.084	0.0652
G3BP1	Q13283	-0.0184	0.944892	-1.12	0.00177907	-0.737	0.378	0.359
IGFBP4	P22692	-0.0178	0.936938	2.92	2.00356e-07	1.95	-0.966	-0.984
SSC5D	A1L4H1	-0.0164	0.960611	1.78	0.000329201	1.19	-0.587	-0.603
EPRS	P07814	-0.016	0.930817	0.0252	0.891167	0.0221	-0.00307	-0.019
ALDH9A1	P49189	-0.0157	0.969924	-0.62	0.158926	-0.408	0.212	0.196
PSMB2	P49721	-0.00744	0.984112	-1.45	0.0029573	-0.962	0.485	0.477
FBN2	P35556	-0.00698	0.986214	6.02	5.72389e-08	4.02	-2.01	-2.01
IL11	P20809	-0.00685	0.98182	-5.76	5.70575e-09	-3.84	1.92	1.92
ALCAM	Q13740	-0.00435	0.991223	2.69	5.17671e-05	1.79	-0.895	-0.899
S100A13	Q99584	-0.00405	0.994182	-2.16	0.00287952	-1.44	0.721	0.717
SERPING1	P05155	-0.000905	0.998258	2.03	0.000618474	1.35	-0.676	-0.677
DCN	P07585	0.00568	0.981899	1.46	0.000168694	0.973	-0.49	-0.484
COL5A1	P20908	0.0101	0.965739	1.79	2.08802e-05	1.19	-0.599	-0.589
ULBP2	Q9BZM5	0.0105	0.968288	-2.27	7.54322e-06	-1.52	0.754	0.765
PARK7	Q99497	0.0121	0.959323	-0.097	0.684285	-0.0687	0.0283	0.0404
VEGFC	P49767	0.0132	0.957763	-0.683	0.019662	-0.46	0.223	0.237
SERPINB2	P05120	0.0153	0.944455	-5.15	8.79422e-10	-3.44	1.71	1.73
ITGA5	P08648	0.0154	0.974753	-1.21	0.0304023	-0.809	0.397	0.412
SPOCK1	Q08629	0.0174	0.942284	-0.757	0.0096255	-0.51	0.247	0.264
MINPP1	Q9UNW1	0.0179	0.973159	-0.115	0.829808	-0.0823	0.0322	0.0501
NME1	P15531	0.0182	0.947407	-0.346	0.229221	-0.237	0.109	0.128
UBE2L3	P68036	0.0194	0.953133	-0.741	0.0459039	-0.5	0.24	0.26
RPS12	P25398	0.0214	0.934724	-1.19	0.00103657	-0.798	0.388	0.41
RPL30	P62888	0.0215	0.945063	-0.391	0.229506	-0.268	0.123	0.145
CPQ	Q9Y646	0.0225	0.949896	0.423	0.25347	0.275	-0.149	-0.126
ACTN4	O43707	0.0235	0.893845	0.298	0.115326	0.191	-0.107	-0.0835
NRP1	O14786	0.0273	0.912957	-0.47	0.0839172	-0.322	0.148	0.175
IGFBP7	Q16270	0.0317	0.894334	1.62	5.09397e-05	1.07	-0.551	-0.52
FAM3C	Q92520	0.0321	0.930501	-1.89	0.000442401	-1.27	0.619	0.651
FST	P19883	0.0336	0.880676	-1.07	0.000741495	-0.723	0.345	0.378
B4GALT5	O43286	0.035	0.923001	2.07	0.000196002	1.37	-0.703	-0.668
PRSS23	O95084	0.0364	0.876451	2.17	3.84246e-06	1.44	-0.737	-0.7
MGAT5	Q09328	0.0377	0.889538	0.478	0.102053	0.306	-0.172	-0.134
CANT1	Q8WVQ1	0.0396	0.955946	0.896	0.229289	0.584	-0.312	-0.272
LTBP1	Q14766	0.0413	0.830994	0.227	0.257891	0.137	-0.0893	-0.048
IGFBP5	P24593	0.0425	0.839258	-0.14	0.507969	-0.108	0.0326	0.0751
RPS8	P62241	0.0459	0.854964	-0.656	0.0240407	-0.453	0.203	0.249
ILF3	Q12906	0.0495	0.862561	-0.561	0.0728983	-0.391	0.171	0.22
FLT1	P17948	0.0519	0.81629	-0.14	0.533058	-0.111	0.0295	0.0814
RPL18	Q07020	0.0521	0.921536	-0.819	0.144667	-0.563	0.256	0.308
TNFRSF11B	O00300	0.0524	0.8335	0.755	0.011721	0.486	-0.269	-0.217
RPS25	P62851	0.0527	0.849703	-0.707	0.0270088	-0.489	0.218	0.271
NPM1	P06748	0.0588	0.922354	-1.92	0.00923071	-1.3	0.619	0.678
GANAB	Q14697	0.0589	0.795444	0.178	0.440196	0.099	-0.079	-0.0201
LRP1	Q07954	0.0618	0.77033	-1.06	0.000501737	-0.731	0.334	0.396
MATN2	O00339	0.0626	0.827028	2.35	1.07483e-05	1.55	-0.805	-0.742
APP	P05067	0.0628	0.750194	-0.517	0.0234496	-0.366	0.152	0.214
UBE2V1	Q13404	0.0628	0.909477	-0.825	0.157992	-0.571	0.254	0.317
PODN	Q7Z5L7	0.0682	0.866371	3.63	5.22614e-06	2.39	-1.23	-1.16
SET	Q01105	0.0683	0.828143	-1.05	0.00684953	-0.726	0.329	0.397
GLA	P06280	0.069	0.855433	-1.33	0.00517895	-0.912	0.422	0.491
NT5E	P21589	0.069	0.740854	-0.777	0.00367518	-0.541	0.236	0.305
RPS16	P62249	0.0696	0.875897	-1.46	0.00769518	-0.998	0.464	0.534
PXDN	Q92626	0.0737	0.801745	0.908	0.0105309	0.581	-0.327	-0.253
GMFB	P60983	0.0738	0.826961	0.0878	0.794809	0.0339	-0.0539	0.0199
PLOD3	O60568	0.0745	0.790583	0.661	0.0372046	0.416	-0.245	-0.171
SERPINE1	P05121	0.0759	0.746988	-0.566	0.0340095	-0.403	0.163	0.239
HLA-B.1	P30479	0.0779	0.812654	-0.208	0.52989	-0.165	0.0435	0.121
EMILIN2	Q9BXX0	0.0819	0.76561	2.12	1.78193e-05	1.39	-0.735	-0.653
SPARC	P09486	0.0837	0.729113	1.89	1.59461e-05	1.23	-0.658	-0.574
VIM	P08670	0.0848	0.703936	-0.139	0.536595	-0.121	0.018	0.103
OLFML3	Q9NRN5	0.0851	0.698741	2.07	3.29691e-06	1.35	-0.718	-0.633
CALU	O43852	0.0852	0.659619	0.185	0.348178	0.095	-0.0901	-0.00487
MGAT1	P26572	0.0867	0.844389	1.49	0.00669717	0.962	-0.524	-0.438
FLRT3	Q9NZU0	0.0868	0.751763	-2.05	2.33491e-05	-1.4	0.654	0.741
ATP6AP1	Q15904	0.0885	0.736829	-0.851	0.00826548	-0.597	0.254	0.343
BST1	Q10588	0.0886	0.801317	1.97	0.000232168	1.28	-0.686	-0.597
CD44	P16070	0.0892	0.697503	-0.216	0.355098	-0.174	0.0424	0.132
QPCT	Q16769	0.0941	0.710317	-1.06	0.00179387	-0.736	0.321	0.415
NID1	P14543	0.0948	0.717396	1.4	0.000318846	0.902	-0.498	-0.404
HLA-C.2	P30508	0.0959	0.790758	-0.725	0.0677407	-0.515	0.21	0.305
B2M	P61769	0.0966	0.701287	1.13	0.00112584	0.719	-0.408	-0.311
PRDX2	P32119	0.0996	0.668861	0.297	0.218672	0.165	-0.132	-0.0327
APLP2	Q06481	0.0997	0.69839	-1.02	0.00249886	-0.712	0.306	0.406
RPL27	P61353	0.1	0.792905	-0.533	0.182869	-0.389	0.144	0.244
WARS	P23381	0.104	0.708711	-0.433	0.14126	-0.324	0.11	0.214
CDH11	P55287	0.106	0.841186	3.14	0.0001462	2.06	-1.08	-0.977
PSMA2	P25787	0.107	0.796119	-0.564	0.194414	-0.412	0.152	0.259
PSME1	Q06323	0.107	0.811084	0.952	0.0543489	0.599	-0.353	-0.246
CHST14	Q8NCH0	0.109	0.770157	0.966	0.0252315	0.608	-0.359	-0.249
NRG1	Q02297	0.11	0.77709	-1.23	0.00896132	-0.859	0.375	0.485
S100A4	P26447	0.112	0.653123	-0.02	0.93564	-0.0506	-0.0306	0.0811
GALNT5	Q7Z7M9	0.114	0.694935	1.9	6.68759e-05	1.23	-0.673	-0.559
FSCN1	Q16658	0.119	0.637034	-0.491	0.0744394	-0.367	0.124	0.243
LDHB	P07195	0.12	0.619434	0.536	0.0463712	0.317	-0.219	-0.0986
COLEC12	Q5KU26	0.121	0.648644	1.74	6.36438e-05	1.12	-0.621	-0.501
PAMR1	Q6UXH9	0.122	0.626578	1.59	8.82938e-05	1.02	-0.57	-0.448
SOD3	P08294	0.122	0.902325	2.72	0.0195501	1.77	-0.948	-0.826
TXN	P10599	0.123	0.690832	-0.156	0.614151	-0.145	0.0111	0.134
TFRC	P02786	0.131	0.765385	-2.97	5.37398e-05	-2.02	0.946	1.08
HSP90AB2P	Q58FF8	0.132	0.642507	-1.78	9.41572e-05	-1.23	0.549	0.681
PGK1	P00558	0.135	0.543327	-0.174	0.435384	-0.161	0.0131	0.148
PSMA6	P60900	0.139	0.599877	-0.371	0.181131	-0.293	0.0771	0.216
TGFB1	P01137	0.14	0.46351	0.23	0.239494	0.107	-0.123	0.0166
EXT1	Q16394	0.141	0.633205	2.05	4.0819e-05	1.32	-0.732	-0.591
NUCB2	P80303	0.141	0.510677	0.336	0.13718	0.177	-0.159	-0.0177
MSN	P26038	0.142	0.479038	0.192	0.343411	0.0805	-0.111	0.0305
TRHDE	Q9UKU6	0.148	0.679929	0.713	0.0684484	0.426	-0.287	-0.139
OSCAR	Q8IYS5	0.149	0.576489	-1.08	0.00212516	-0.767	0.309	0.458
STC1	P52823	0.15	0.496232	-2.63	3.83188e-07	-1.8	0.827	0.977
SCUBE3	Q8IX30	0.154	0.456236	-0.669	0.00757193	-0.497	0.172	0.326
PSG5	Q15238	0.16	0.714773	4.46	1.60716e-06	2.92	-1.54	-1.38
LTBP2	Q14767	0.16	0.521212	0.129	0.605684	0.0323	-0.0963	0.0641
CRTAP	O75718	0.163	0.506359	0.0925	0.703021	0.00748	-0.085	0.0776
ERP44	Q9BS26	0.163	0.58219	0.533	0.093444	0.301	-0.232	-0.0691
XYLT1	Q86Y38	0.164	0.520359	0.304	0.246701	0.148	-0.156	0.00822
CD109	Q6YHK3	0.167	0.520164	1.22	0.000764453	0.756	-0.462	-0.295
PLIN3	O60664	0.168	0.7199	-0.956	0.0631317	-0.693	0.263	0.43
QSOX1	O00391	0.175	0.401722	0.7	0.00611395	0.408	-0.292	-0.117
VASN	Q6EMK4	0.177	0.449535	0.000898	0.996893	-0.0585	-0.0594	0.118
SLIT2	O94813	0.18	0.768011	4.62	2.07439e-05	3.02	-1.6	-1.42
COL6A1	P12109	0.186	0.357639	0.89	0.00109515	0.532	-0.359	-0.173
GBA	P04062	0.19	0.602412	-0.298	0.418588	-0.262	0.036	0.226
GNPTG	Q9UJJ9	0.191	0.601102	-0.724	0.0694892	-0.546	0.178	0.369
HSPG2	P98160	0.193	0.543948	2.11	5.68835e-05	1.34	-0.767	-0.574
GSN	P06396	0.193	0.56342	1.02	0.010516	0.618	-0.405	-0.213
PTPRG	P23470	0.196	0.371169	-0.875	0.00209433	-0.649	0.226	0.422
CLIC4	Q9Y696	0.199	0.501493	1.04	0.0049678	0.626	-0.412	-0.213
ASPH	Q12797	0.204	0.501459	0.661	0.0489144	0.372	-0.288	-0.084
CLSTN1	O94985	0.213	0.275339	0.818	0.00145378	0.474	-0.344	-0.13
PAM	P19021	0.213	0.289007	0.298	0.149497	0.128	-0.17	0.0429
S100A6	P06703	0.214	0.3963	-0.216	0.391489	-0.215	0.000758	0.214
CHID1	Q9BWS9	0.215	0.492037	-0.822	0.0223806	-0.62	0.202	0.417
RPS11	P62280	0.216	0.67523	-1.17	0.0421938	-0.853	0.319	0.534
SRPX	P78539	0.218	0.344469	-1.68	2.41386e-05	-1.19	0.486	0.704
WNT5A	P41221	0.223	0.427444	-0.193	0.490376	-0.203	-0.01	0.213
NUCB1	Q02818	0.226	0.251968	1.01	0.000353277	0.597	-0.412	-0.185
AEBP1	Q8IUX7	0.227	0.311123	0.721	0.00738431	0.405	-0.316	-0.0889
LEPRE1	Q32P28	0.227	0.301239	0.551	0.0252223	0.292	-0.259	-0.0324
TIMP2	P16035	0.228	0.275522	0.902	0.00117864	0.526	-0.377	-0.149
LAMC1	P11047	0.231	0.333794	1.09	0.000860896	0.648	-0.44	-0.209
PSMB3	P49720	0.233	0.492053	0.433	0.215192	0.211	-0.222	0.011
MFGE8	Q08431	0.235	0.268139	0.382	0.0868322	0.176	-0.206	0.0295
CLIC1	O00299	0.236	0.388029	-0.26	0.344029	-0.252	0.00793	0.244
PGLS	O95336	0.243	0.432422	0.00546	0.985666	-0.0773	-0.0827	0.16
RPS19	P39019	0.243	0.571228	-0.481	0.274252	-0.401	0.0792	0.322
ADAM17	P78536	0.244	0.31059	-0.453	0.0767636	-0.384	0.0696	0.314
GREM1	O60565	0.245	0.356779	0.0527	0.839456	-0.0466	-0.0992	0.146
ARPC4	P59998	0.251	0.414431	0.0323	0.914841	-0.0621	-0.0944	0.157
HSPA13	P48723	0.252	0.581434	-1.39	0.0111943	-1.01	0.378	0.63
RPS9	P46781	0.255	0.541329	-1.12	0.0204512	-0.832	0.289	0.544
COL1A2	P08123	0.257	0.361838	2.02	2.74166e-05	1.26	-0.759	-0.502
TPP1	O14773	0.257	0.513511	-0.966	0.0300097	-0.73	0.236	0.493
GAPDH	P04406	0.264	0.227985	-0.192	0.370752	-0.216	-0.0239	0.24
HLA-A	P30443	0.272	0.658283	0.183	0.765276	0.0314	-0.152	0.12
FBLN7	Q53RD9	0.276	0.499531	2.92	3.17193e-05	1.85	-1.06	-0.788
MMP2	P08253	0.278	0.161435	0.325	0.107717	0.124	-0.201	0.0769
CST3	P01034	0.283	0.279698	0.681	0.0211807	0.36	-0.322	-0.0384
SDCBP	O00560	0.283	0.18342	0.757	0.00365413	0.41	-0.347	-0.0635
GSPT1	P15170	0.289	0.244969	-0.707	0.0133902	-0.568	0.139	0.428
CSF1	P09603	0.295	0.258415	3.09	3.27163e-07	1.96	-1.13	-0.835
BMP2	P12643	0.296	0.311881	-2.11	2.52043e-05	-1.51	0.605	0.9
SDC4	P31431	0.297	0.316489	0.118	0.682845	-0.0201	-0.138	0.158
OS9	Q13438	0.299	0.559888	-0.715	0.180588	-0.576	0.139	0.437
PTPRK	Q15262	0.302	0.188003	0.379	0.106814	0.152	-0.227	0.0748
STMN1	P16949	0.302	0.502753	1.19	0.0215018	0.694	-0.498	-0.196
CTSZ	Q9UBR2	0.305	0.340451	0.322	0.316392	0.113	-0.209	0.0963
EMILIN1	Q9Y6C2	0.306	0.202175	-0.0166	0.942239	-0.113	-0.0965	0.21
TNFAIP6	P98066	0.307	0.373203	-1.34	0.0025236	-0.996	0.344	0.651
HEXB	P07686	0.312	0.20819	-0.123	0.606675	-0.186	-0.0631	0.249
PLOD1	Q02809	0.314	0.251528	0.205	0.444422	0.0322	-0.173	0.141
CCDC80	Q76M96	0.315	0.41148	1.17	0.0104879	0.674	-0.495	-0.179
HLA-C	P10321	0.323	0.215839	-0.000977	0.996882	-0.108	-0.107	0.216
LAMB2	P55268	0.323	0.172197	-0.069	0.759267	-0.154	-0.0847	0.238
HTRA1	Q92743	0.324	0.159553	0.17	0.442584	0.00536	-0.165	0.159
COL6A3	P12111	0.328	0.124652	-0.466	0.0387989	-0.42	0.0462	0.374
COL5A2	P05997	0.329	0.685016	2.81	0.00551956	1.77	-1.05	-0.718
PTN	P21246	0.329	0.559187	3.12	0.000234985	1.97	-1.15	-0.82
PTPRS	Q13332	0.329	0.184315	-0.376	0.134266	-0.361	0.0158	0.345
CLTA	P09496	0.331	0.466569	0.196	0.663169	0.0205	-0.176	0.156
DCBLD2	Q96PD2	0.331	0.328241	-1.85	0.000225689	-1.35	0.508	0.839
FN1	P02751	0.333	0.110774	0.713	0.00409002	0.364	-0.349	-0.0156
INHBA	P08476	0.338	0.509569	-7.5	6.09085e-08	-5.11	2.39	2.72
MRC2	Q9UBG0	0.341	0.298139	0.298	0.359656	0.0851	-0.213	0.128
EFEMP1	Q12805	0.344	0.236864	5.64	3.60889e-09	3.64	-1.99	-1.65
LAMA4	Q16363	0.344	0.149273	0.973	0.00143809	0.534	-0.439	-0.0953
PLOD2	O00469	0.345	0.15516	-0.237	0.315502	-0.273	-0.0361	0.309
TIMP1	P01033	0.346	0.14157	-1.5	5.18345e-05	-1.12	0.386	0.731
GALNT6	Q8NCL4	0.346	0.142462	0.109	0.624783	-0.0424	-0.152	0.194
LGALS3	P17931	0.346	0.583378	0.85	0.194632	0.452	-0.399	-0.0529
CTSK	P43235	0.357	0.425403	-1.08	0.031988	-0.838	0.24	0.598
COL3A1	P02461	0.358	0.260456	2.7	6.14995e-06	1.68	-1.02	-0.661
COL6A2	P12110	0.36	0.131944	0.773	0.00589398	0.395	-0.378	-0.0174
MMP10	P09238	0.363	0.211767	-4.25	4.52156e-08	-2.95	1.3	1.66
SVEP1	Q4LDE5	0.363	0.198402	4.68	1.41829e-08	3	-1.68	-1.32
HGF	P14210	0.367	0.0932695	-0.839	0.00185885	-0.682	0.158	0.524
LAMB1	P07942	0.369	0.110886	1.63	2.17961e-05	0.963	-0.666	-0.297
PSME3	P61289	0.369	0.289071	0.172	0.613156	-0.00852	-0.18	0.189
RPL4	P36578	0.372	0.206357	0.114	0.687508	-0.0481	-0.162	0.21
KCTD12	Q96CX2	0.373	0.257663	-0.329	0.314279	-0.344	-0.0146	0.358
SEMA3A	Q14563	0.375	0.403944	-0.57	0.214952	-0.505	0.0651	0.44
ACTR2	P61160	0.376	0.423111	-0.413	0.381481	-0.401	0.0121	0.388
ECM1	Q16610	0.387	0.0819117	0.827	0.00221202	0.422	-0.405	-0.0177
SDF4	Q9BRK5	0.39	0.108556	0.697	0.0108358	0.335	-0.363	0.0279
B4GALT1	P15291	0.395	0.153974	0.684	0.024224	0.324	-0.36	0.0357
CD59	P13987	0.4	0.0966398	0.528	0.0365422	0.219	-0.309	0.0907
ECE1	P42892	0.403	0.177236	-0.0891	0.754264	-0.194	-0.105	0.299
LOXL3	P58215	0.404	0.314063	2.81	3.20519e-05	1.74	-1.07	-0.669
CLEC11A	Q9Y240	0.405	0.0888525	1.57	3.33175e-05	0.914	-0.66	-0.254
SPTAN1	Q13813	0.41	0.442392	1.2	0.0420741	0.665	-0.537	-0.127
MOXD1	Q6UVY6	0.424	0.118547	0.444	0.103672	0.155	-0.289	0.134
PDCD1LG2	Q9BQ51	0.427	0.164915	0.538	0.0885844	0.217	-0.322	0.105
THBS2	P35442	0.427	0.0680474	0.28	0.208309	0.0443	-0.236	0.191
LOXL2	Q9Y4K0	0.428	0.10385	0.494	0.06611	0.187	-0.307	0.121
RPL3	P39023	0.43	0.636406	0.392	0.666695	0.118	-0.274	0.156
ADAMTS4	O75173	0.432	0.303282	-4.39	1.02934e-06	-3.07	1.32	1.75
CLMP	Q9H6B4	0.432	0.178354	0.676	0.0477628	0.306	-0.369	0.0628
DNAJB9	Q9UBS3	0.444	0.210642	0.318	0.359867	0.0641	-0.254	0.19
COL1A1	P02452	0.449	0.0934995	1.85	2.33771e-05	1.08	-0.766	-0.318
YWHAH	Q04917	0.452	0.222535	1.24	0.00546207	0.676	-0.564	-0.112
TFPI2	P48307	0.459	0.45335	-6.98	5.57304e-07	-4.81	2.17	2.63
PLTP	P55058	0.46	0.196099	1.83	0.000313478	1.06	-0.762	-0.302
NOV	P48745	0.463	0.148119	4.47	5.99343e-08	2.83	-1.65	-1.18
CDH13	P55290	0.465	0.0480684	-0.306	0.167666	-0.359	-0.0529	0.412
LAMA2	P24043	0.475	0.21376	3.67	1.95125e-06	2.29	-1.38	-0.907
GGH	Q92820	0.479	0.10574	2.66	2.7049e-06	1.61	-1.04	-0.566
IGFBP6	P24592	0.48	0.270067	1.05	0.0299375	0.538	-0.509	-0.0288
TGFBI	Q15582	0.483	0.205656	3.15	7.08188e-06	1.94	-1.21	-0.729
CPA4	Q9UI42	0.484	0.175185	2.17	8.40127e-05	1.28	-0.884	-0.4
PSAP	P07602	0.484	0.037799	0.92	0.00116802	0.452	-0.468	0.0162
IGF2	P01344	0.486	0.0453347	-0.639	0.0135085	-0.588	0.051	0.537
CD248	Q9HCU0	0.491	0.114505	1.11	0.00316383	0.576	-0.533	-0.0425
MMP1	P03956	0.499	0.0281103	-0.841	0.00162261	-0.727	0.114	0.613
SEMA7A	O75326	0.5	0.0555096	-1.9	1.25301e-05	-1.43	0.466	0.966
CRIM1	Q9NZV1	0.5	0.258201	2.02	0.000784935	1.18	-0.84	-0.34
SERPINB7	O75635	0.501	0.0397195	3.82	1.18046e-08	2.38	-1.44	-0.94
CFH	P08603	0.501	0.12208	1.37	0.00104855	0.749	-0.625	-0.124
BMP1	P13497	0.503	0.038343	1.14	0.000339575	0.594	-0.548	-0.0454
LTBP3	Q9NS15	0.505	0.052837	0.115	0.625432	-0.0916	-0.207	0.298
ALDOC	P09972	0.512	0.362716	0.141	0.797629	-0.0765	-0.218	0.294
AXL	P30530	0.513	0.0494132	1.51	7.5121e-05	0.839	-0.676	-0.163
FBLN1	P23142	0.513	0.0371001	2.65	3.4241e-07	1.6	-1.06	-0.542
MFAP2	P55001	0.519	0.0347325	0.281	0.213001	0.0145	-0.267	0.252
SIRPA	P78324	0.519	0.455061	-0.135	0.844368	-0.263	-0.128	0.391
COL7A1	Q02388	0.52	0.0624754	-3.88	4.43949e-08	-2.76	1.12	1.64
SERPINF1	P36955	0.527	0.407518	4.29	4.7346e-05	2.68	-1.61	-1.08
CTHRC1	Q96CG8	0.533	0.0606669	-0.45	0.104283	-0.478	-0.0277	0.506
SECTM1	Q8WVN6	0.533	0.129437	1.58	0.00071861	0.876	-0.704	-0.171
GRN	P28799	0.54	0.0781714	0.608	0.0517705	0.226	-0.383	0.157
FBN1	P35555	0.545	0.0145606	2.07	8.56556e-07	1.2	-0.87	-0.325
COL18A1	P39060	0.551	0.0587812	1.54	0.000165276	0.844	-0.697	-0.147
CDH2	P19022	0.553	0.0128885	-0.322	0.107483	-0.399	-0.0772	0.476
SPON2	Q9BUD6	0.574	0.0348305	-1.59	6.17418e-05	-1.25	0.338	0.912
CLEC3B	P05452	0.581	0.399496	2.18	0.00859186	1.26	-0.919	-0.338
VCAN	P13611	0.581	0.0487473	0.0881	0.739234	-0.135	-0.223	0.358
ARPC2	O15144	0.582	0.12935	0.689	0.0790373	0.265	-0.423	0.158
DAG1	Q14118	0.586	0.0303675	1.49	9.56442e-05	0.795	-0.691	-0.105
RPS4X	P62701	0.59	0.0723643	-0.42	0.182128	-0.477	-0.0567	0.534
TPM1	P09493	0.593	0.0320553	4.1	1.79172e-08	2.53	-1.56	-0.971
PCDH18	Q9HCL0	0.593	0.109575	1.11	0.00837531	0.545	-0.569	0.0237
ICAM5	Q9UMF0	0.595	0.145537	-1.79	0.000872563	-1.39	0.4	0.994
MMP14	P50281	0.598	0.272149	-4.18	1.43016e-05	-2.99	1.2	1.79
FBLN2	P98095	0.599	0.0249901	0.0804	0.728998	-0.146	-0.227	0.373
CTSD	P07339	0.602	0.0609936	0.554	0.08036	0.169	-0.385	0.216
GPC1	P35052	0.605	0.123819	3.04	1.00871e-05	1.83	-1.22	-0.612
NTM	Q9P121	0.606	0.0112519	0.0947	0.634506	-0.139	-0.233	0.372
OAF	Q86UD1	0.607	0.0200552	0.644	0.0150838	0.227	-0.417	0.19
GNS	P15586	0.611	0.20244	1.49	0.00812921	0.79	-0.701	-0.0893
DKK1	O94907	0.617	0.333772	4.46	3.35381e-05	2.77	-1.69	-1.08
RPL14	P50914	0.618	0.15076	0.579	0.175722	0.18	-0.399	0.219
LOXL1	Q08397	0.625	0.159676	2.47	0.000161895	1.44	-1.03	-0.407
LUM	P51884	0.633	0.0401883	4.01	6.59627e-08	2.46	-1.55	-0.915
LMAN2	Q12907	0.652	0.0140382	0.222	0.331152	-0.0693	-0.291	0.361
ITM2B	Q9Y287	0.655	0.0990629	1.51	0.00205175	0.787	-0.721	-0.0658
MXRA8	Q9BRK3	0.658	0.00877156	-0.0688	0.738062	-0.265	-0.196	0.461
AREG	P15514	0.667	0.0847759	-3.6	1.80092e-06	-2.62	0.978	1.65
FUCA2	Q9BTY2	0.667	0.197902	1.44	0.0143554	0.739	-0.703	-0.036
CACYBP	Q9HB71	0.676	0.112273	0.523	0.207351	0.123	-0.4	0.277
FHL1	Q13642	0.676	0.0844699	1.78	0.000579951	0.96	-0.818	-0.142
PCOLCE	Q15113	0.677	0.01	1.78	1.06841e-05	0.961	-0.819	-0.142
CTSB	P07858	0.682	0.00997497	0.102	0.640509	-0.159	-0.262	0.421
FRAS1	Q86XX4	0.698	0.0193	0.891	0.00537084	0.361	-0.53	0.168
FSTL1	Q12841	0.702	0.0169333	2.07	9.76615e-06	1.15	-0.924	-0.222
SPP1	P10451	0.721	0.0718356	-1.15	0.00948466	-1.01	0.144	0.865
COMP	P49747	0.726	0.206287	0.718	0.210852	0.237	-0.481	0.245
PDGFRB	P09619	0.728	0.0709697	-0.102	0.7812	-0.311	-0.208	0.519
EXT2	Q93063	0.758	0.0129612	2.42	3.15186e-06	1.36	-1.06	-0.301
GM2A	P17900	0.758	0.136441	2.03	0.00165554	1.1	-0.928	-0.17
ANGPTL4	Q9BY76	0.76	0.125742	-5.64	3.61761e-07	-4.02	1.63	2.39
PTK7	Q13308	0.766	0.0226578	-0.152	0.601983	-0.357	-0.205	0.561
ADAM19	Q9H013	0.777	0.145939	-3.04	0.000130726	-2.29	0.754	1.53
UGP2	Q16851	0.778	0.106462	0.992	0.0475747	0.402	-0.59	0.188
RNH1	P13489	0.81	0.0106693	0.0192	0.94175	-0.257	-0.276	0.534
NRCAM	Q92823	0.817	0.0205196	-1.39	0.000940761	-1.2	0.191	1.01
COL12A1	Q99715	0.839	0.00168515	1.25	9.27207e-05	0.556	-0.698	0.142
BGN	P21810	0.842	0.00433466	0.37	0.134345	-0.0342	-0.404	0.438
TXNDC5	Q8NBS9	0.921	0.103456	1.2	0.0429224	0.49	-0.706	0.216
PNP	P00491	0.938	0.0213796	-0.191	0.588695	-0.44	-0.249	0.689
PVR	P15151	0.943	0.223457	1.15	0.145785	0.451	-0.697	0.246
CXCL12	P48061	0.964	0.000552147	5.87	8.11076e-11	3.59	-2.28	-1.31
CSPG4	Q6UVK1	1.04	0.00341582	-0.291	0.303938	-0.54	-0.249	0.789
HEXA	P06865	1.05	0.0208935	-0.555	0.174063	-0.718	-0.163	0.882
ISLR	O14498	1.06	0.134276	2.94	0.00128807	1.6	-1.33	-0.27
ANXA6	P08133	1.12	0.0112322	1.04	0.0161124	0.322	-0.723	0.4
S100A11	P31949	1.14	0.409929	1.71	0.225346	0.762	-0.95	0.188
SUMF2	Q8NBJ7	1.14	0.0141761	0.436	0.277237	-0.0877	-0.524	0.612
AGRN	O00468	1.16	0.00602289	2.24	6.34124e-05	1.11	-1.13	0.0273
THBS3	P49746	1.16	0.0827962	3.12	0.000460259	1.7	-1.43	-0.27
C1R	P00736	1.22	0.0585279	6.5	7.49997e-07	3.93	-2.57	-1.35
PAPPA	Q13219	1.3	0.0367228	1.91	0.00566215	0.839	-1.07	0.233
GALNT10	Q86SR1	1.32	0.0220048	2.77	0.00023205	1.41	-1.36	-0.0441
ATRN	O75882	1.34	0.0469694	1.79	0.0128684	0.749	-1.04	0.294
RPL18A	Q02543	1.34	0.0148809	0.527	0.271203	-0.0956	-0.623	0.719
PLAU	P00749	1.4	0.000419513	-4.11	4.95703e-08	-3.2	0.901	2.3
EFEMP2	O95967	1.46	0.0129736	5.22	1.17521e-06	2.99	-2.23	-0.765
SERPINA1	P01009	1.49	6.27187e-05	-0.491	0.0501506	-0.824	-0.333	1.16
IGFBP3	P17936	1.6	0.0103215	3.84	2.42582e-05	2.02	-1.81	-0.212
ROBO1	Q9Y6N7	1.67	0.00792815	-0.041	0.936038	-0.584	-0.543	1.13
BSG	P35613	1.74	0.00686519	1.87	0.00455632	0.666	-1.2	0.537
ENPP1	P22413	1.92	0.0105583	0.231	0.710546	-0.487	-0.718	1.21
DKK3	Q9UBP4	2.14	0.0143288	5.21	3.68193e-05	2.76	-2.45	-0.307

## Sheet: Suppl. Table 2B
Protein IDs	Majority protein IDs	Peptide counts (all)	Peptide counts (razor+unique)	Peptide counts (unique)	Protein names	Gene names	Fasta headers	Number of proteins	Peptides	Razor + unique peptides	Unique peptides	Peptides 1_1A	Peptides 2_1B	Peptides 3_1C	Peptides 4_2A	Peptides 5_2B	Peptides 6_2C	Peptides 7_3A	Peptides 8_3B	Peptides 9_3C	Razor + unique peptides 1_1A	Razor + unique peptides 2_1B	Razor + unique peptides 3_1C	Razor + unique peptides 4_2A	Razor + unique peptides 5_2B	Razor + unique peptides 6_2C	Razor + unique peptides 7_3A	Razor + unique peptides 8_3B	Razor + unique peptides 9_3C	Unique peptides 1_1A	Unique peptides 2_1B	Unique peptides 3_1C	Unique peptides 4_2A	Unique peptides 5_2B	Unique peptides 6_2C	Unique peptides 7_3A	Unique peptides 8_3B	Unique peptides 9_3C	Sequence coverage [%]	Unique + razor sequence coverage [%]	Unique sequence coverage [%]	Mol. weight [kDa]	Sequence length	Sequence lengths	Q-value	Score	Sequence coverage 1_1A [%]	Sequence coverage 2_1B [%]	Sequence coverage 3_1C [%]
A0AVT1	A0AVT1	6	6	6	Ubiquitin-like modifier-activating enzyme 6	UBA6		1	6	6	6	0	2	0	0	6	1	0	2	1	0	2	0	0	6	1	0	2	1	0	2	0	0	6	1	0	2	1	6.2	6.2	6.2	117.97	1052	1052	0	18.785	0	1.5	0
A1L4H1	A1L4H1	25	25	25	Soluble scavenger receptor cysteine-rich domain-containing protein SSC5D	SSC5D		1	25	25	25	20	9	5	16	12	10	17	9	11	20	9	5	16	12	10	17	9	11	20	9	5	16	12	10	17	9	11	21.2	21.2	21.2	165.74	1573	1573	0	323.31	18.9	8.6	4.6
A2RUB1	A2RUB1	1	1	1	Uncharacterized protein C17orf104	C17orf104		1	1	1	1	0	0	0	0	0	0	1	0	0	0	0	0	0	0	0	1	0	0	0	0	0	0	0	0	1	0	0	0.9	0.9	0.9	107.56	952	952	1	-2	0	0	0
A2RUS2	A2RUS2	1	1	1	DENN domain-containing protein 3	DENND3		1	1	1	1	0	0	0	0	1	0	0	0	1	0	0	0	0	1	0	0	0	1	0	0	0	0	1	0	0	0	1	0.6	0.6	0.6	135.89	1198	1198	1	-2	0	0	0
A4D0S4	A4D0S4	2	1	1	Laminin subunit beta-4	LAMB4		1	2	1	1	1	0	0	0	0	0	0	1	0	0	0	0	0	0	0	0	1	0	0	0	0	0	0	0	0	1	0	1.1	0.5	0.5	193.54	1761	1761	1	-2	0.6	0	0
A5D8V6	A5D8V6	1	1	1	Vacuolar protein sorting-associated protein 37C	VPS37C		1	1	1	1	0	0	0	0	0	0	0	1	0	0	0	0	0	0	0	0	1	0	0	0	0	0	0	0	0	1	0	3.4	3.4	3.4	38.658	355	355	0.0036153	2.9655	0	0	0
A8K855	A8K855	1	1	1	EF-hand calcium-binding domain-containing protein 7	EFCAB7		1	1	1	1	0	0	0	0	0	1	0	0	0	0	0	0	0	0	1	0	0	0	0	0	0	0	0	1	0	0	0	1.7	1.7	1.7	71.981	629	629	1	-2	0	0	0
CON__A2A4G1;CON__P02533;CON__P08779;P02533;P08779;CON__P08727;CON__P19001;CON__Q04695;CON__Q9QWL7;P08727;Q04695;P19012;CON__Q6IFX2	CON__A2A4G1;CON__P02533;CON__P08779;P02533;P08779;CON__P08727;CON__P19001;CON__Q04695;CON__Q9QWL7;P08727;Q04695;P19012	3;3;3;3;3;2;2;2;2;2;2;2;1	1;1;1;1;1;1;1;1;1;1;1;1;1	0;0;0;0;0;0;0;0;0;0;0;0;0	Keratin, type I cytoskeletal 14;Keratin, type I cytoskeletal 16;Keratin, type I cytoskeletal 19;Keratin, type I cytoskeletal 17;Keratin, type I cytoskeletal 15	KRT14;KRT16;KRT19;KRT17;KRT15	;;;;;;;;;;;	13	3	1	0	2	0	1	0	0	0	0	0	0	0	0	1	0	0	0	0	0	0	0	0	0	0	0	0	0	0	0	5.5	2	0	49.493	456	456;472;473;472;473;400;403;432;433;400;432;456;452	1	-2	3.5	0	2
CON__A2I7N0	CON__A2I7N0	11	3	1				1	11	3	1	6	7	9	11	11	10	10	9	10	1	2	2	3	3	2	3	2	2	0	1	1	1	1	0	1	1	0	23.4	7.5	4.6	46.311	411	411	0	33.454	13.6	16.5	21.4
CON__A2I7N1	CON__A2I7N1	10	1	1				1	10	1	1	7	5	8	10	10	10	9	8	10	1	0	1	1	1	1	1	1	1	1	0	1	1	1	1	1	1	1	20.4	4.6	4.6	46.397	411	411	0	41.042	15.6	9	18.5
CON__A2I7N3	CON__A2I7N3	5	2	2				1	5	2	2	3	3	3	5	3	4	4	3	3	1	1	1	2	0	1	1	1	1	1	1	1	2	0	1	1	1	1	10.6	4.6	4.6	46.941	417	417	0	5.2641	6.7	6.7	6.7
CON__ENSEMBL:ENSBTAP00000007350	CON__ENSEMBL:ENSBTAP00000007350	28	28	3				1	28	28	3	7	4	6	20	6	12	12	14	13	7	4	6	20	6	12	12	14	13	0	0	0	2	1	0	1	2	1	18.8	18.8	2.4	192.99	1742	1742	0	141.27	4.5	2.4	3.7
CON__ENSEMBL:ENSBTAP00000013050	CON__ENSEMBL:ENSBTAP00000013050	4	4	4				1	4	4	4	0	0	0	4	0	0	3	0	0	0	0	0	4	0	0	3	0	0	0	0	0	4	0	0	3	0	0	8	8	8	51.988	452	452	0	6.96	0	0	0
CON__ENSEMBL:ENSBTAP00000014147	CON__ENSEMBL:ENSBTAP00000014147	5	5	5				1	5	5	5	0	1	2	5	2	2	3	3	3	0	1	2	5	2	2	3	3	3	0	1	2	5	2	2	3	3	3	57.5	57.5	57.5	11.756	113	113	0	56.927	0	13.3	26.5
CON__ENSEMBL:ENSBTAP00000016046	CON__ENSEMBL:ENSBTAP00000016046	30	14	14				1	30	14	14	24	9	9	22	10	8	22	11	16	13	1	4	11	1	2	10	3	5	13	1	4	11	1	2	10	3	5	40.5	21.1	21.1	77.456	706	706	0	159.18	35.4	14.6	16.6
CON__ENSEMBL:ENSBTAP00000016285	CON__ENSEMBL:ENSBTAP00000016285	2	2	2				1	2	2	2	0	0	0	2	0	0	0	0	0	0	0	0	2	0	0	0	0	0	0	0	0	2	0	0	0	0	0	5.8	5.8	5.8	63.485	591	591	0	10.396	0	0	0
CON__ENSEMBL:ENSBTAP00000018229	CON__ENSEMBL:ENSBTAP00000018229	30	3	3				1	30	3	3	11	12	16	26	17	19	24	19	22	0	0	0	2	2	2	2	2	2	0	0	0	2	2	2	2	2	2	49.1	2.3	2.3	53.661	475	475	0	10.419	26.9	29.7	32.6
CON__ENSEMBL:ENSBTAP00000018574;P05546	CON__ENSEMBL:ENSBTAP00000018574	10;1	10;1	10;1				2	10	10	10	6	5	8	8	7	8	8	7	7	6	5	8	8	7	8	8	7	7	6	5	8	8	7	8	8	7	7	21	21	21	55.207	496	496;499	0	80.076	14.5	8.7	16.1
CON__ENSEMBL:ENSBTAP00000023055;Q04756	CON__ENSEMBL:ENSBTAP00000023055;Q04756	3;3	3;3	3;3	Hepatocyte growth factor activator;Hepatocyte growth factor activator short chain;Hepatocyte growth factor activator long chain	HGFAC	;	2	3	3	3	0	0	0	2	1	0	0	1	0	0	0	0	2	1	0	0	1	0	0	0	0	2	1	0	0	1	0	5.4	5.4	5.4	67.703	634	634;655	0	5.2309	0	0	0
CON__ENSEMBL:ENSBTAP00000023402	CON__ENSEMBL:ENSBTAP00000023402	1	1	1				1	1	1	1	0	0	0	1	0	1	1	1	0	0	0	0	1	0	1	1	1	0	0	0	0	1	0	1	1	1	0	2.2	2.2	2.2	46.017	411	411	0.0041068	2.4228	0	0	0
CON__ENSEMBL:ENSBTAP00000024146;P20742	CON__ENSEMBL:ENSBTAP00000024146	73;3	73;3	63;1				2	73	73	63	44	34	47	61	42	51	56	53	58	44	34	47	61	42	51	56	53	58	37	29	44	53	36	44	49	46	49	49.6	49.6	45.9	164.34	1477	1477;1482	0	323.31	35.2	26.1	36.3
CON__ENSEMBL:ENSBTAP00000024462	CON__ENSEMBL:ENSBTAP00000024462	11	11	1				1	11	11	1	2	2	2	10	5	4	8	6	6	2	2	2	10	5	4	8	6	6	0	0	0	1	0	0	1	0	0	34.1	34.1	3.3	46.543	419	419	0	69.238	7.4	7.4	7.4
CON__ENSEMBL:ENSBTAP00000024466	CON__ENSEMBL:ENSBTAP00000024466	11	1	1				1	11	1	1	2	2	2	10	5	4	7	6	6	0	0	0	1	0	0	0	0	0	0	0	0	1	0	0	0	0	0	30.4	2.7	2.7	43.9	401	401	1	-2	7.7	7.7	7.7
CON__ENSEMBL:ENSBTAP00000032840	CON__ENSEMBL:ENSBTAP00000032840	7	7	7				1	7	7	7	0	0	0	4	2	2	3	2	4	0	0	0	4	2	2	3	2	4	0	0	0	4	2	2	3	2	4	10.9	10.9	10.9	92.273	825	825	0	18.433	0	0	0
CON__ENSEMBL:ENSBTAP00000033053	CON__ENSEMBL:ENSBTAP00000033053	2	1	1				1	2	1	1	1	0	1	2	1	1	1	1	1	0	0	0	1	0	0	0	1	0	0	0	0	1	0	0	0	1	0	20.1	15.1	15.1	14.759	139	139	0	17.737	5	0	5
CON__ENSEMBL:ENSBTAP00000034412	CON__ENSEMBL:ENSBTAP00000034412	11	11	11				1	11	11	11	3	3	4	5	4	0	4	3	4	3	3	4	5	4	0	4	3	4	3	3	4	5	4	0	4	3	4	46.2	46.2	46.2	22.336	199	199	0	34.606	16.1	17.1	15.6
CON__ENSEMBL:ENSBTAP00000037665	CON__ENSEMBL:ENSBTAP00000037665	12	12	12				1	12	12	12	4	1	3	9	3	6	6	5	4	4	1	3	9	3	6	6	5	4	4	1	3	9	3	6	6	5	4	19.7	19.7	19.7	65.19	578	578	0	41.664	6.9	1.6	6.9
CON__ENSEMBL:ENSBTAP00000038329	CON__ENSEMBL:ENSBTAP00000038329	2	1	1				1	2	1	1	2	1	2	2	2	2	2	2	2	1	0	1	1	1	1	1	1	1	1	0	1	1	1	1	1	1	1	27.5	15	15	8.5787	80	80	0	16.429	27.5	12.5	27.5
CON__O43790;CON__Q14533;O43790;Q14533	CON__O43790;CON__Q14533;O43790;Q14533	3;3;3;3	1;1;1;1	1;1;1;1	Keratin, type II cuticular Hb6;Keratin, type II cuticular Hb1	KRT86;KRT81	;;;	4	3	1	1	1	2	1	2	1	1	2	1	1	0	0	0	0	0	0	1	0	0	0	0	0	0	0	0	1	0	0	7.4	5.6	5.6	53.5	486	486;505;486;505	1	-2	1.9	1.9	1.9
CON__P00735;P00734	CON__P00735	19;3	19;3	19;3				2	19	19	19	8	4	6	14	5	6	13	6	8	8	4	6	14	5	6	13	6	8	8	4	6	14	5	6	13	6	8	32.6	32.6	32.6	70.505	625	625;622	0	248.5	14.6	8.6	12.5
CON__P00761	CON__P00761	8	8	8				1	8	8	8	7	6	7	8	6	7	6	6	6	7	6	7	8	6	7	6	6	6	7	6	7	8	6	7	6	6	6	40.7	40.7	40.7	24.409	231	231	0	320.4	40.7	30.3	32
CON__P00978;P02760	CON__P00978	17;1	17;1	17;1				2	17	17	17	5	2	10	15	13	13	11	12	12	5	2	10	15	13	13	11	12	12	5	2	10	15	13	13	11	12	12	36.9	36.9	36.9	39.234	352	352;352	0	323.01	16.8	8.2	31.5
CON__P01030	CON__P01030	28	3	3				1	28	3	3	9	5	7	20	5	13	12	12	13	2	1	1	2	0	1	1	0	1	2	1	1	2	0	1	1	0	1	17.7	1.3	1.3	192.79	1741	1741	0	9.1785	5.3	2.8	4.1
CON__P01044-1;CON__Q2KJ62	CON__P01044-1;CON__Q2KJ62	20;19	20;19	6;6			;	2	20	20	6	11	11	15	16	9	10	16	12	12	11	11	15	16	9	10	16	12	12	2	3	4	4	3	4	6	4	4	37.4	37.4	12.9	68.889	621	621;621	0	132.4	21.1	18.4	30
CON__P01045-1;P01042	CON__P01045-1	17;1	3;0	3;0				2	17	3	3	9	10	14	14	8	8	13	10	11	0	2	3	2	2	2	3	2	3	0	2	3	2	2	2	3	2	3	28.3	3.7	3.7	68.709	619	619;644	0	11.458	17	15.8	23.3
CON__P01966;P69905;P02008	CON__P01966	11;4;1	11;4;1	11;4;1				3	11	11	11	10	7	6	8	8	7	8	8	8	10	7	6	8	8	7	8	8	8	10	7	6	8	8	7	8	8	8	71.1	71.1	71.1	15.184	142	142;142;142	0	175.4	71.1	57	48.6
CON__P02070;P69892;P69891;P02100	CON__P02070;P69892;P69891;P02100	4;2;2;2	1;1;1;1	1;1;1;1	Hemoglobin subunit gamma-2;Hemoglobin subunit gamma-1;Hemoglobin subunit epsilon	HBG2;HBG1;HBE1	;;;	4	4	1	1	3	2	3	4	3	3	3	3	2	0	0	0	1	0	0	0	0	0	0	0	0	1	0	0	0	0	0	22.1	6.2	6.2	15.954	145	145;147;147;147	1	-2	15.9	15.9	15.9
CON__P02662	CON__P02662	3	3	3				1	3	3	3	2	2	0	0	0	0	0	0	0	2	2	0	0	0	0	0	0	0	2	2	0	0	0	0	0	0	0	20.1	20.1	20.1	22.975	199	199	0	13.41	13.1	14.6	0
CON__P02663	CON__P02663	6	6	6				1	6	6	6	6	1	0	0	0	0	0	0	0	6	1	0	0	0	0	0	0	0	6	1	0	0	0	0	0	0	0	23.2	23.2	23.2	24.348	207	207	0	8.6788	23.2	3.9	0
CON__P02672	CON__P02672	6	6	6				1	6	6	6	1	0	1	5	2	2	3	2	2	1	0	1	5	2	2	3	2	2	1	0	1	5	2	2	3	2	2	11.5	11.5	11.5	67.011	615	615	0	19.572	2.8	0	1.5
CON__P02676;P02675	CON__P02676	7;2	7;2	7;2				2	7	7	7	0	1	0	3	0	1	0	3	2	0	1	0	3	0	1	0	3	2	0	1	0	3	0	1	0	3	2	13.9	13.9	13.9	56.44	495	495;491	0	20.546	0	2	0
CON__P02754	CON__P02754	1	1	1				1	1	1	1	1	0	0	0	0	0	0	0	0	1	0	0	0	0	0	0	0	0	1	0	0	0	0	0	0	0	0	8.6	8.6	8.6	18.281	162	162	0.0035997	2.9167	8.6	0	0
CON__P02768-1;P02768	CON__P02768-1;P02768	12;12	5;5	5;5	Serum albumin	ALB	;	2	12	5	5	5	8	8	9	9	9	8	7	8	1	2	2	2	2	3	2	0	2	1	2	2	2	2	3	2	0	2	14	8.2	8.2	69.366	609	609;609	0	8.9479	6.7	9.7	9.7
CON__P02769	CON__P02769	112	112	105				1	112	112	105	71	82	80	99	85	83	90	94	86	71	82	80	99	85	83	90	94	86	67	76	74	92	78	77	84	87	80	88.8	88.8	88.8	69.293	607	607	0	323.31	78.9	86.7	82.4
CON__P06868;P00747	CON__P06868	37;2	37;2	37;2				2	37	37	37	6	8	13	27	12	13	20	21	15	6	8	13	27	12	13	20	21	15	6	8	13	27	12	13	20	21	15	54.7	54.7	54.7	91.215	812	812;810	0	321.57	9.4	12.6	21.8
CON__P07224	CON__P07224	6	5	5				1	6	5	5	1	0	2	5	3	4	3	3	3	1	0	2	5	2	4	3	3	3	1	0	2	5	2	4	3	3	3	9.9	8.7	8.7	75.132	675	675	0	16.704	1.2	0	2.7
CON__P12763;P02765	CON__P12763	28;4	28;4	28;4				2	28	28	28	8	15	13	17	15	14	17	18	22	8	15	13	17	15	14	17	18	22	8	15	13	17	15	14	17	18	22	49	49	49	38.418	359	359;367	0	323.31	30.1	41.8	37.6
CON__P13645;P13645;CON__P02535-1;CON__P05784;CON__P08730-1;CON__Q7Z3Z0;CON__Q7Z3Y8;CON__Q148H6;CON__Q7Z3Y9;CON__Q9Z2K1;CON__Q3ZAW8;CON__Q7Z3Y7;CON__Q99456;Q7Z3Z0;Q7Z3Y8;Q7Z3Y7;Q7Z3Y9;Q99456	CON__P13645;P13645	12;12;4;1;1;1;1;1;1;1;1;1;1;1;1;1;1;1	12;12;4;1;1;1;1;1;1;1;1;1;1;1;1;1;1;1	10;10;3;0;0;0;0;0;0;0;0;0;0;0;0;0;0;0	Keratin, type I cytoskeletal 10	KRT10	;	18	12	12	10	10	3	0	1	2	0	0	1	0	10	3	0	1	2	0	0	1	0	8	3	0	1	2	0	0	1	0	22.4	22.4	19.7	59.51	593	593;584;570;423;437;450;459;464;468;469;474;486;494;450;459;464;468;494	0	32.577	16.9	6.1	0
CON__P15497	CON__P15497	32	32	32				1	32	32	32	14	15	17	25	16	14	23	20	21	14	15	17	25	16	14	23	20	21	14	15	17	25	16	14	23	20	21	74.3	74.3	74.3	30.276	265	265	0	260.37	52.1	57	53.6
CON__P17690;P02749	CON__P17690	14;1	14;1	14;1				2	14	14	14	7	5	6	11	7	7	8	8	7	7	5	6	11	7	7	8	8	7	7	5	6	11	7	7	8	8	7	51.9	51.9	51.9	38.252	345	345;345	0	183.54	33.6	22.9	29
CON__P17697	CON__P17697	7	7	7				1	7	7	7	4	5	5	6	5	2	4	5	2	4	5	5	6	5	2	4	5	2	4	5	5	6	5	2	4	5	2	15.9	15.9	15.9	51.113	439	439	0	43.231	11.2	13.9	13.9
CON__P28800;P08697	CON__P28800	14;1	14;1	14;1				2	14	14	14	4	3	6	9	3	6	8	6	9	4	3	6	9	3	6	8	6	9	4	3	6	9	3	6	8	6	9	22.8	22.8	22.8	54.71	492	492;491	0	106.32	10.4	7.1	10.6
CON__P34955	CON__P34955	37	37	37				1	37	37	37	26	26	27	34	25	27	28	30	25	26	26	27	34	25	27	28	30	25	26	26	27	34	25	27	28	30	25	49.3	49.3	49.3	46.103	416	416	0	323.31	39.2	44.5	44.5
CON__P35527;P35527	CON__P35527;P35527	7;7	6;6	6;6	Keratin, type I cytoskeletal 9	KRT9	;	2	7	6	6	1	1	2	1	0	0	5	1	0	0	1	2	1	0	0	5	1	0	0	1	2	1	0	0	5	1	0	14.4	13.3	13.3	62.129	623	623;623	0	46.217	1.1	2.1	5.5
CON__P35908;P35908;CON__Q9R0H5;CON__Q6NXH9;CON__Q6IFZ6;CON__Q7Z794;Q7Z794	CON__P35908;P35908;CON__Q9R0H5;CON__Q6NXH9;CON__Q6IFZ6;CON__Q7Z794;Q7Z794	4;4;2;2;2;2;2	1;1;0;0;0;0;0	1;1;0;0;0;0;0	Keratin, type II cytoskeletal 2 epidermal;Keratin, type II cytoskeletal 1b	KRT2;KRT77	;;;;;;	7	4	1	1	1	1	0	0	1	1	2	1	1	0	0	0	0	0	0	1	0	1	0	0	0	0	0	0	1	0	1	6.7	2.5	2.5	65.865	645	645;639;524;539;572;578;578	0	10.785	1.9	1.1	0
CON__P41361;P01008	CON__P41361	25;6	25;6	25;6				2	25	25	25	20	10	14	13	14	11	19	12	14	20	10	14	13	14	11	19	12	14	20	10	14	13	14	11	19	12	14	44.9	44.9	44.9	52.347	465	465;464	0	323.31	43.4	23.2	33.1
CON__P50448	CON__P50448	9	7	7				1	9	7	7	3	1	2	6	5	5	3	7	5	1	1	2	6	5	5	3	7	5	1	1	2	6	5	5	3	7	5	17.5	14.5	14.5	51.723	468	468	0	65.956	6.4	3.4	6
CON__P67983;Q8N339;P80297;P04732;P02795;P13640	CON__P67983;Q8N339;P80297;P04732;P02795;P13640	2;2;2;2;2;2	2;2;2;2;2;2	2;2;2;2;2;2	Metallothionein-1M;Metallothionein-1X;Metallothionein-1E;Metallothionein-2;Metallothionein-1G	MT1M;MT1X;MT1E;MT2A;MT1G	;;;;;	6	2	2	2	2	1	0	0	0	0	0	0	0	2	1	0	0	0	0	0	0	0	2	1	0	0	0	0	0	0	0	21.3	21.3	21.3	5.9511	61	61;61;61;61;61;62	0	5.1378	21.3	19.7	0
CON__P81644	CON__P81644	4	4	4				1	4	4	4	3	4	2	2	3	3	3	3	4	3	4	2	2	3	3	3	3	4	3	4	2	2	3	3	3	3	4	22	22	22	11.202	100	100	0	24.042	22	22	11
CON__Q01546;Q01546	CON__Q01546;Q01546	4;4	1;1	1;1	Keratin, type II cytoskeletal 2 oral	KRT76	;	2	4	1	1	1	4	1	2	1	1	2	1	1	0	1	0	0	0	0	0	0	0	0	1	0	0	0	0	0	0	0	4.1	1.6	1.6	65.87	638	638;638	1	-2	1.4	4.1	1.4
CON__Q03247	CON__Q03247	5	5	4				1	5	5	4	1	0	0	1	4	1	2	1	1	1	0	0	1	4	1	2	1	1	0	0	0	1	3	0	1	1	1	14.6	14.6	11.7	35.979	316	316	0	15.612	2.8	0	0
CON__Q05443	CON__Q05443	10	5	5				1	10	5	5	5	2	4	7	4	5	10	6	5	0	1	1	4	2	3	5	4	3	0	1	1	4	2	3	5	4	3	18.7	9.6	9.6	38.756	342	342	0	19.49	9.4	5.3	8.2
CON__Q05B55	CON__Q05B55	3	3	3				1	3	3	3	1	0	1	2	1	0	3	3	3	1	0	1	2	1	0	3	3	3	1	0	1	2	1	0	3	3	3	22.9	22.9	22.9	26.59	240	240	0	12.995	7.5	0	7.5
CON__Q0IIK2;CON__Q29443	CON__Q0IIK2;CON__Q29443	83;82	83;82	75;74			;	2	83	83	75	52	44	51	72	54	58	65	66	62	52	44	51	72	54	58	65	66	62	50	41	48	67	51	54	60	60	56	88.6	88.6	86.1	77.738	704	704;685	0	323.31	68.5	66.3	69.2
CON__Q0V8M9;Q06033	CON__Q0V8M9	17;4	17;4	17;4				2	17	17	17	4	3	7	12	5	10	13	8	10	4	3	7	12	5	10	13	8	10	4	3	7	12	5	10	13	8	10	19	19	19	99.536	891	891;890	0	62.384	4.7	3.3	9.3
CON__Q0VCM5;P19827	CON__Q0VCM5	11;1	11;1	11;1				2	11	11	11	0	2	3	7	3	6	3	6	7	0	2	3	7	3	6	3	6	7	0	2	3	7	3	6	3	6	7	11	11	11	101.24	906	906;911	0	52.821	0	1.9	3.6
CON__Q1A7A4	CON__Q1A7A4	7	7	7				1	7	7	7	0	0	0	5	0	1	3	2	4	0	0	0	5	0	1	3	2	4	0	0	0	5	0	1	3	2	4	5.4	5.4	5.4	188.74	1677	1677	0	19.687	0	0	0
CON__Q1RMK2;CON__ENSEMBL:ENSBTAP00000011227	CON__Q1RMK2	7;1	7;1	6;0				2	7	7	6	2	1	4	6	3	3	5	0	5	2	1	4	6	3	3	5	0	5	1	1	3	5	2	2	4	0	4	12.6	12.6	11.4	65.056	597	597;137	0	29.197	3.2	2	6.2
CON__Q1RMN8	CON__Q1RMN8	3	3	3				1	3	3	3	2	2	2	3	2	3	3	3	2	2	2	2	3	2	3	3	3	2	2	2	2	3	2	3	3	3	2	20.1	20.1	20.1	24.536	234	234	0	118.33	14.1	14.1	14.1
CON__Q28065	CON__Q28065	15	15	15				1	15	15	15	1	2	8	11	6	11	3	7	10	1	2	8	11	6	11	3	7	10	1	2	8	11	6	11	3	7	10	24.6	24.6	24.6	68.886	610	610	0	51.569	2.8	4.8	13.9
CON__Q28085	CON__Q28085	14	14	14				1	14	14	14	0	3	2	11	3	6	6	5	4	0	3	2	11	3	6	6	5	4	0	3	2	11	3	6	6	5	4	13.5	13.5	13.5	140.37	1236	1236	0	83.871	0	2.5	1.4
CON__Q28107;P12259	CON__Q28107	15;4	15;4	15;4				2	15	15	15	2	3	1	5	2	1	5	7	4	2	3	1	5	2	1	5	7	4	2	3	1	5	2	1	5	7	4	8.1	8.1	8.1	248.98	2211	2211;2224	0	34.812	1.2	1.9	0.6
CON__Q28194	CON__Q28194	47	4	4				1	47	4	4	40	15	13	30	13	14	37	14	15	0	0	0	1	0	1	3	2	2	0	0	0	1	0	1	3	2	2	36.6	5	5	129.39	1170	1170	0	10.225	31.5	13.2	10.6
CON__Q29RQ1;P10643	CON__Q29RQ1	8;1	8;1	8;1				2	8	8	8	0	0	0	6	1	3	3	2	5	0	0	0	6	1	3	3	2	5	0	0	0	6	1	3	3	2	5	13.6	13.6	13.6	93.089	843	843;843	0	54.41	0	0	0
CON__Q2HJF0	CON__Q2HJF0	8	6	6				1	8	6	6	0	1	1	8	1	2	3	2	3	0	0	0	6	0	0	1	0	1	0	0	0	6	0	0	1	0	1	17	13.8	13.8	69.182	622	622	0	113.58	0	1.9	1.9
CON__Q2KIF2	CON__Q2KIF2	9	9	9				1	9	9	9	0	0	0	4	1	4	3	3	5	0	0	0	4	1	4	3	3	5	0	0	0	4	1	4	3	3	5	22	22	22	38.348	346	346	0	23.818	0	0	0
CON__Q2KIG3;Q96IY4	CON__Q2KIG3;Q96IY4	2;1	2;1	2;1	Carboxypeptidase B2	CPB2	;	2	2	2	2	0	0	0	1	0	1	1	0	0	0	0	0	1	0	1	1	0	0	0	0	0	1	0	1	1	0	0	3.5	3.5	3.5	48.821	423	423;423	0.0036023	2.9228	0	0	0
CON__Q2KIT0	CON__Q2KIT0	2	2	2				1	2	2	2	0	0	2	2	1	2	1	1	1	0	0	2	2	1	2	1	1	1	0	0	2	2	1	2	1	1	1	18.3	18.3	18.3	20.646	191	191	0	8.1918	0	0	18.3
CON__Q2KJF1;P04217	CON__Q2KJF1	18;1	18;1	18;1				2	18	18	18	9	10	11	17	11	13	14	14	15	9	10	11	17	11	13	14	14	15	9	10	11	17	11	13	14	14	15	43.7	43.7	43.7	53.553	503	503;495	0	229.64	21.7	23.5	29.8
CON__Q2TBQ1	CON__Q2TBQ1	1	1	1				1	1	1	1	0	0	1	0	0	1	1	1	1	0	0	1	0	0	1	1	1	1	0	0	1	0	0	1	1	1	1	1.8	1.8	1.8	75.166	661	661	0.0066269	2.1599	0	0	1.8
CON__Q2UVX4	CON__Q2UVX4	70	70	60				1	70	70	60	19	24	29	59	30	32	47	45	46	19	24	29	59	30	32	47	45	46	15	18	23	50	23	26	41	38	37	41.3	41.3	37.2	187.37	1662	1662	0	323.31	13.5	16.7	21.4
CON__Q32PI4	CON__Q32PI4	5	5	5				1	5	5	5	0	1	1	3	2	0	0	2	2	0	1	1	3	2	0	0	2	2	0	1	1	3	2	0	0	2	2	11.2	11.2	11.2	68.932	618	618	0	28.987	0	1.3	1.3
CON__Q3KUS7	CON__Q3KUS7	22	22	22				1	22	22	22	5	4	7	17	4	11	14	12	13	5	4	7	17	4	11	14	12	13	5	4	7	17	4	11	14	12	13	28.6	28.6	28.6	85.411	760	760	0	245.07	7.1	5.3	10
CON__Q3MHH8;P19961;P04746;P04745	CON__Q3MHH8;P19961;P04746;P04745	4;3;3;3	4;3;3;3	4;3;3;3	Alpha-amylase 2B;Pancreatic alpha-amylase;Alpha-amylase 1	AMY2B;AMY2A;AMY1A	;;;	4	4	4	4	0	0	1	3	1	3	3	1	2	0	0	1	3	1	3	3	1	2	0	0	1	3	1	3	3	1	2	9	9	9	57.407	511	511;511;511;511	0	12.684	0	0	2
CON__Q3MHN2;P02748	CON__Q3MHN2;P02748	2;1	2;1	2;1	Complement component C9;Complement component C9a;Complement component C9b	C9	;	2	2	2	2	0	0	0	2	0	0	1	0	0	0	0	0	2	0	0	1	0	0	0	0	0	2	0	0	1	0	0	4.7	4.7	4.7	61.998	548	548;559	0	7.9859	0	0	0
CON__Q3MHN5;P02774	CON__Q3MHN5	32;7	32;7	5;0				2	32	32	5	12	14	18	29	17	21	25	22	23	12	14	18	29	17	21	25	22	23	1	2	2	5	2	4	3	5	3	50.8	50.8	7.8	53.341	474	474;474	0	323.31	29.3	31.9	34.8
CON__Q3SX09;P68871;P02042	CON__Q3SX09	14;2;2	14;2;2	11;1;1				3	14	14	11	13	11	11	13	12	12	13	11	10	13	11	11	13	12	12	13	11	10	10	9	8	10	9	9	10	8	8	50.2	50.2	38.8	22.06	201	201;147;147	0	169.87	47.3	47.3	47.3
CON__Q3SX14	CON__Q3SX14	21	2	2				1	21	2	2	15	6	5	9	7	7	9	14	10	1	2	1	1	1	1	1	2	1	1	2	1	1	1	1	1	2	1	21.6	3.3	3.3	85.686	781	781	0	40.331	15.6	9.6	7
CON__Q3SX28	CON__Q3SX28	19	1	1				1	19	1	1	16	7	6	10	6	8	14	8	5	1	0	0	1	0	1	1	0	0	1	0	0	1	0	1	1	0	0	41.9	3.2	3.2	33.012	284	284	0	4.692	38	17.6	18.7
CON__Q3SZ57	CON__Q3SZ57	42	42	36				1	42	42	36	23	14	21	32	19	23	28	28	28	23	14	21	32	19	23	28	28	28	19	12	19	28	17	19	24	23	23	63.3	63.3	57.9	68.587	610	610	0	323.31	42	27.4	33.9
CON__Q3SZH5	CON__Q3SZH5	9	9	9				1	9	9	9	1	0	2	8	3	2	5	5	4	1	0	2	8	3	2	5	5	4	1	0	2	8	3	2	5	5	4	26.7	26.7	26.7	45.456	424	424	0	64.317	3.3	0	6.6
CON__Q3SZR3	CON__Q3SZR3	16	16	16				1	16	16	16	8	7	8	15	9	9	12	12	10	8	7	8	15	9	9	12	12	10	8	7	8	15	9	9	12	12	10	56.9	56.9	56.9	23.182	202	202	0	242.7	43.1	34.7	38.6
CON__Q3SZV7	CON__Q3SZV7	21	21	21				1	21	21	21	12	11	12	17	12	12	15	17	12	12	11	12	17	12	12	15	17	12	12	11	12	17	12	12	15	17	12	32.2	32.2	32.2	52.295	460	460	0	200.37	23	24.1	20.7
CON__Q3T052	CON__Q3T052	23	23	21				1	23	23	21	9	10	11	18	8	15	16	16	12	9	10	11	18	8	15	16	16	12	7	9	10	16	6	13	14	15	10	29.4	29.4	27.4	101.51	916	916	0	186.36	11.4	11.6	13.2
CON__Q3Y5Z3	CON__Q3Y5Z3	6	6	6				1	6	6	6	1	2	3	6	3	2	5	1	5	1	2	3	6	3	2	5	1	5	1	2	3	6	3	2	5	1	5	30	30	30	26.133	240	240	0	46.957	5	8.8	12.1
CON__Q3ZBS7	CON__Q3ZBS7	7	7	6				1	7	7	6	6	5	5	5	7	7	6	5	5	6	5	5	5	7	7	6	5	5	5	4	4	4	6	6	5	4	4	11.8	11.8	10.3	54.099	484	484	0	27.464	9.3	8.3	7.2
CON__Q58D62	CON__Q58D62	19	19	19				1	19	19	19	9	11	12	14	11	11	13	14	14	9	11	12	14	11	11	13	14	14	9	11	12	14	11	11	13	14	14	39.3	39.3	39.3	42.663	387	387	0	242.15	28.4	23.8	25.8
CON__Q6IFU6;Q6A163	CON__Q6IFU6;Q6A163	1;1	1;1	1;1	Keratin, type I cytoskeletal 39	KRT39	;	2	1	1	1	0	0	0	0	0	0	0	1	0	0	0	0	0	0	0	0	1	0	0	0	0	0	0	0	0	1	0	2.4	2.4	2.4	55.651	491	491;491	1	-2	0	0	0
CON__Q95121	CON__Q95121	14	8	8				1	14	8	8	8	3	3	12	6	6	11	11	7	3	1	1	7	3	3	5	6	2	3	1	1	7	3	3	5	6	2	35.6	22.4	22.4	46.228	416	416	0	39.809	20.7	8.9	8.9
CON__Q95M17	CON__Q95M17	2	2	2				1	2	2	2	0	0	0	2	0	0	0	0	0	0	0	0	2	0	0	0	0	0	0	0	0	2	0	0	0	0	0	5.1	5.1	5.1	52.129	472	472	0	6.0884	0	0	0
CON__Q9DCV7;CON__Q3KNV1;CON__P08729;CON__P05787;P08729;P05787;CON__Q9NSB2;CON__Q6ISB0;Q9NSB2;CON__Q9H552;CON__P07744;CON__Q8VED5;CON__Q5XKE5;CON__Q8BGZ7;CON__O95678;CON__P50446;CON__P48668;CON__P04259;CON__P02538;CON__Q922U2;CON__P13647;CON__Q5XQN5;CON__P12035;Q5XKE5;O95678;P48668;P02538;P13647;P12035;CON__Q14CN4-1;CON__Q6IME9;CON__Q3SY84;CON__Q7RTS7;CON__Q32MB2;CON__P19013;Q14CN4;Q3SY84;Q7RTS7;P…	CON__Q9DCV7;CON__Q3KNV1;CON__P08729;CON__P05787;P08729;P05787;CON__Q9NSB2;CON__Q6ISB0;Q9NSB2;CON__Q9H552;CON__P07744;CON__Q8VED5;CON__Q5XKE5;CON__Q8BGZ7;CON__O95678;CON__P50446;CON__P48668;CON__P04259;CON__P02538;CON__Q922U2;CON__P13647;CON__Q5XQN5;CON__P12035;Q5XKE5;O95678;P48668;P02538;P13647;P12035	5;5;5;5;5;5;4;4;4;3;3;3;3;3;3;3;3;3;3;3;3;3;3;3;3;3;3;3;3;1;1;1;1;1;1;1;1;1;1;1	1;1;1;1;1;1;1;1;1;1;1;1;1;1;1;1;1;1;1;1;1;1;1;1;1;1;1;1;1;1;1;1;1;1;1;1;1;1;1;1	0;0;0;0;0;0;0;0;0;0;0;0;0;0;0;0;0;0;0;0;0;0;0;0;0;0;0;0;0;0;0;0;0;0;0;0;0;0;0;0	Keratin, type II cytoskeletal 7;Keratin, type II cytoskeletal 8;Keratin, type II cuticular Hb4;Keratin, type II cytoskeletal 79;Keratin, type II cytoskeletal 75;Keratin, type II cytoskeletal 6C;Keratin, type II cytoskeletal 6A;Keratin, type II cytoskeletal 5;Keratin, type II cytoskeletal 3	KRT7;KRT8;KRT84;KRT79;KRT75;KRT6C;KRT6A;KRT5;KRT3	;;;;;;;;;;;;;;;;;;;;;;;;;;;;	40	5	1	0	3	5	3	4	2	3	4	2	2	0	1	0	0	0	0	1	0	0	0	0	0	0	0	0	0	0	0	5.5	1.5	0	50.708	457	457;469;469;483;469;483;600;600;600;499;525;531;535;551;551;553;564;564;564;580;590;601;629;535;551;564;564;590;628;511;520;523;529;540;594;511;523;529;534;540	1	-2	3.9	5.5	3.9
CON__Q9N2I2	CON__Q9N2I2	12	12	12				1	12	12	12	4	3	5	9	3	5	8	4	5	4	3	5	9	3	5	8	4	5	4	3	5	9	3	5	8	4	5	32.4	32.4	32.4	45.296	404	404	0	104.96	9.2	8.4	18.6
CON__Q9TRI1;P19823	CON__Q9TRI1	32;8	32;8	32;8				2	32	32	32	18	20	22	24	20	23	23	19	24	18	20	22	24	20	23	23	19	24	18	20	22	24	20	23	23	19	24	29.5	29.5	29.5	106.19	946	946;946	0	323.31	19.5	20.1	22.4
CON__Q9TT36	CON__Q9TT36	7	7	5				1	7	7	5	0	1	2	5	1	3	2	6	2	0	1	2	5	1	3	2	6	2	0	0	1	4	0	2	2	4	1	22.9	22.9	18.7	46.017	411	411	0	44.923	0	2.4	4.9
CON__Q9TTE1	CON__Q9TTE1	12	12	3				1	12	12	3	7	8	10	12	11	11	9	10	11	7	8	10	12	11	11	9	10	11	1	2	2	3	2	2	1	2	2	29	29	11.2	46.203	411	411	0	239.54	18.7	20	24.8
CON__REFSEQ:XP_001252647	CON__REFSEQ:XP_001252647	9	7	4				1	9	7	4	7	5	3	9	6	6	8	5	5	5	4	2	7	4	4	6	3	3	3	2	0	4	1	1	3	1	1	18.7	14.9	8.6	46.897	417	417	0	55.688	17	12.7	6.7
CON__REFSEQ:XP_585019;P43652	CON__REFSEQ:XP_585019	20;2	20;2	20;2				2	20	20	20	2	6	9	17	6	11	13	9	10	2	6	9	17	6	11	13	9	10	2	6	9	17	6	11	13	9	10	31.6	31.6	31.6	69.561	604	604;599	0	144.19	5	12.3	17.9
O00115	O00115	5	5	5	Deoxyribonuclease-2-alpha	DNASE2		1	5	5	5	0	2	1	3	1	2	2	1	3	0	2	1	3	1	2	2	1	3	0	2	1	3	1	2	2	1	3	14.7	14.7	14.7	39.58	360	360	0	11.121	0	5.3	3.3
O00151	O00151	3	3	3	PDZ and LIM domain protein 1	PDLIM1		1	3	3	3	1	1	0	1	1	0	3	0	1	1	1	0	1	1	0	3	0	1	1	1	0	1	1	0	3	0	1	12.8	12.8	12.8	36.071	329	329	0	12.715	4.6	4.6	0
O00154	O00154	4	4	4	Cytosolic acyl coenzyme A thioester hydrolase	ACOT7		1	4	4	4	1	1	1	0	2	1	1	3	3	1	1	1	0	2	1	1	3	3	1	1	1	0	2	1	1	3	3	11.8	11.8	11.8	41.796	380	380	0	10.57	4.2	2.9	4.2
O00161	O00161	1	1	1	Synaptosomal-associated protein 23	SNAP23		1	1	1	1	0	0	0	0	1	0	0	1	0	0	0	0	0	1	0	0	1	0	0	0	0	0	1	0	0	1	0	6.6	6.6	6.6	23.354	211	211	0	3.7867	0	0	0
O00231	O00231	10	10	10	26S proteasome non-ATPase regulatory subunit 11	PSMD11		1	10	10	10	1	2	1	0	4	2	2	7	6	1	2	1	0	4	2	2	7	6	1	2	1	0	4	2	2	7	6	29.1	29.1	29.1	47.463	422	422	0	56.479	2.6	5.2	2.6
O00233	O00233	3	3	3	26S proteasome non-ATPase regulatory subunit 9	PSMD9		1	3	3	3	3	0	1	1	2	1	1	2	1	3	0	1	1	2	1	1	2	1	3	0	1	1	2	1	1	2	1	14.3	14.3	14.3	24.682	223	223	0	7.4366	14.3	0	4.5
O00244	O00244	3	3	3	Copper transport protein ATOX1	ATOX1		1	3	3	3	1	0	1	0	1	0	1	3	1	1	0	1	0	1	0	1	3	1	1	0	1	0	1	0	1	3	1	30.9	30.9	30.9	7.4016	68	68	0	7.1473	19.1	0	19.1
O00264;O15173	O00264	5;1	5;1	5;1	Membrane-associated progesterone receptor component 1	PGRMC1		2	5	5	5	4	1	0	4	1	1	3	1	1	4	1	0	4	1	1	3	1	1	4	1	0	4	1	1	3	1	1	17.4	17.4	17.4	21.671	195	195;223	0	18.076	17.4	7.2	0
O00299	O00299	15	15	15	Chloride intracellular channel protein 1	CLIC1		1	15	15	15	8	11	12	8	11	11	6	11	8	8	11	12	8	11	11	6	11	8	8	11	12	8	11	11	6	11	8	67.6	67.6	67.6	26.922	241	241	0	103.99	46.1	49.8	47.3
O00300	O00300	27	27	27	Tumor necrosis factor receptor superfamily member 11B	TNFRSF11B		1	27	27	27	21	16	14	17	16	14	18	18	15	21	16	14	17	16	14	18	18	15	21	16	14	17	16	14	18	18	15	51.4	51.4	51.4	46.026	401	401	0	323.31	44.1	37.9	34.7
O00303	O00303	3	3	3	Eukaryotic translation initiation factor 3 subunit F	EIF3F		1	3	3	3	0	1	0	0	1	0	1	3	1	0	1	0	0	1	0	1	3	1	0	1	0	0	1	0	1	3	1	7.6	7.6	7.6	37.563	357	357	0	14.624	0	4.2	0
O00339	O00339	14	14	14	Matrilin-2	MATN2		1	14	14	14	13	0	0	5	1	0	7	0	0	13	0	0	5	1	0	7	0	0	13	0	0	5	1	0	7	0	0	18.6	18.6	18.6	106.84	956	956	0	53.848	16.9	0	0
O00391	O00391	38	38	38	Sulfhydryl oxidase 1	QSOX1		1	38	38	38	31	17	18	29	24	24	26	26	22	31	17	18	29	24	24	26	26	22	31	17	18	29	24	24	26	26	22	43	43	43	82.577	747	747	0	323.31	38.2	25	22.2
O00410;O60518	O00410	4;1	4;1	4;1	Importin-5	IPO5		2	4	4	4	1	1	0	0	1	2	2	2	0	1	1	0	0	1	2	2	2	0	1	1	0	0	1	2	2	2	0	2.9	2.9	2.9	123.63	1097	1097;1105	0	4.2346	0.6	0.7	0
O00423	O00423	1	1	1	Echinoderm microtubule-associated protein-like 1	EML1		1	1	1	1	1	0	0	0	0	0	1	0	0	1	0	0	0	0	0	1	0	0	1	0	0	0	0	0	1	0	0	1.3	1.3	1.3	89.86	815	815	1	-2	1.3	0	0
O00429	O00429	1	1	1	Dynamin-1-like protein	DNM1L		1	1	1	1	0	0	0	0	0	0	1	0	0	0	0	0	0	0	0	1	0	0	0	0	0	0	0	0	1	0	0	1.4	1.4	1.4	81.876	736	736	0.0066445	2.175	0	0	0
O00462	O00462	2	2	2	Beta-mannosidase	MANBA		1	2	2	2	0	0	0	0	0	0	2	0	0	0	0	0	0	0	0	2	0	0	0	0	0	0	0	0	2	0	0	2.6	2.6	2.6	100.89	879	879	0	3.9098	0	0	0
O00468	O00468	40	40	40	Agrin;Agrin N-terminal 110 kDa subunit;Agrin C-terminal 110 kDa subunit;Agrin C-terminal 90 kDa fragment;Agrin C-terminal 22 kDa fragment	AGRN		1	40	40	40	26	7	11	27	10	17	25	12	21	26	7	11	27	10	17	25	12	21	26	7	11	27	10	17	25	12	21	27.3	27.3	27.3	217.23	2067	2067	0	305.01	18.4	3.6	6
O00469	O00469	26	26	26	Procollagen-lysine,2-oxoglutarate 5-dioxygenase 2	PLOD2		1	26	26	26	14	11	9	14	13	14	12	14	13	14	11	9	14	13	14	12	14	13	14	11	9	14	13	14	12	14	13	37.7	37.7	37.7	84.685	737	737	0	132.98	19.5	17.1	13.2
O00560	O00560	8	8	8	Syntenin-1	SDCBP		1	8	8	8	4	4	3	5	5	5	5	5	4	4	4	3	5	5	5	5	5	4	4	4	3	5	5	5	5	5	4	39.6	39.6	39.6	32.444	298	298	0	134.92	21.1	22.5	19.5
O00584	O00584	6	6	6	Ribonuclease T2	RNASET2		1	6	6	6	4	0	0	3	0	2	2	0	1	4	0	0	3	0	2	2	0	1	4	0	0	3	0	2	2	0	1	27.7	27.7	27.7	29.48	256	256	0	33.984	15.6	0	0
O00622	O00622	9	9	9	Protein CYR61	CYR61		1	9	9	9	4	1	1	4	4	1	4	4	3	4	1	1	4	4	1	4	4	3	4	1	1	4	4	1	4	4	3	28.6	28.6	28.6	42.026	381	381	0	26.344	13.1	3.4	3.4
O00754	O00754	5	5	5	Lysosomal alpha-mannosidase;Lysosomal alpha-mannosidase A peptide;Lysosomal alpha-mannosidase B peptide;Lysosomal alpha-mannosidase C peptide;Lysosomal alpha-mannosidase D peptide;Lysosomal alpha-mannosidase E peptide	MAN2B1		1	5	5	5	2	1	0	0	1	1	1	2	0	2	1	0	0	1	1	1	2	0	2	1	0	0	1	1	1	2	0	5.1	5.1	5.1	113.74	1011	1011	0	7.3176	1.7	1.1	0
O00764	O00764	3	3	3	Pyridoxal kinase	PDXK		1	3	3	3	2	1	0	0	1	1	1	2	2	2	1	0	0	1	1	1	2	2	2	1	0	0	1	1	1	2	2	9.9	9.9	9.9	35.102	312	312	0	7.8391	6.4	3.2	0
O14498	O14498	7	7	7	Immunoglobulin superfamily containing leucine-rich repeat protein	ISLR		1	7	7	7	6	0	1	4	2	1	5	1	2	6	0	1	4	2	1	5	1	2	6	0	1	4	2	1	5	1	2	21.5	21.5	21.5	45.997	428	428	0	34.876	18.9	0	3.3
O14514	O14514	1	1	1	Brain-specific angiogenesis inhibitor 1	BAI1		1	1	1	1	0	0	0	0	0	0	0	0	1	0	0	0	0	0	0	0	0	1	0	0	0	0	0	0	0	0	1	0.4	0.4	0.4	173.5	1584	1584	1	-2	0	0	0
O14579	O14579	4	4	4	Coatomer subunit epsilon	COPE		1	4	4	4	1	1	0	0	1	1	0	4	1	1	1	0	0	1	1	0	4	1	1	1	0	0	1	1	0	4	1	18.5	18.5	18.5	34.482	308	308	0	13.891	6.5	6.5	0
O14647	O14647	1	1	1	Chromodomain-helicase-DNA-binding protein 2	CHD2		1	1	1	1	0	0	0	0	1	0	0	0	1	0	0	0	0	1	0	0	0	1	0	0	0	0	1	0	0	0	1	0.7	0.7	0.7	211.34	1828	1828	1	-2	0	0	0
O14657	O14657	10	10	10	Torsin-1B	TOR1B		1	10	10	10	4	2	3	3	6	5	4	7	5	4	2	3	3	6	5	4	7	5	4	2	3	3	6	5	4	7	5	33.9	33.9	33.9	37.978	336	336	0	65.033	16.1	8.3	12.2
O14672	O14672	17	17	17	Disintegrin and metalloproteinase domain-containing protein 10	ADAM10		1	17	17	17	13	7	4	12	9	9	11	7	10	13	7	4	12	9	9	11	7	10	13	7	4	12	9	9	11	7	10	28.6	28.6	28.6	84.141	748	748	0	151.22	21.8	11.9	6.8
O14737	O14737	5	5	5	Programmed cell death protein 5	PDCD5		1	5	5	5	1	1	1	1	0	1	4	1	1	1	1	1	1	0	1	4	1	1	1	1	1	1	0	1	4	1	1	36.8	36.8	36.8	14.285	125	125	0	14.022	9.6	10.4	8.8
O14773	O14773	9	9	9	Tripeptidyl-peptidase 1	TPP1		1	9	9	9	4	5	4	5	5	5	4	6	5	4	5	4	5	5	5	4	6	5	4	5	4	5	5	5	4	6	5	23.8	23.8	23.8	61.247	563	563	0	83.179	9.4	12.6	10.7
O14786	O14786	20	20	20	Neuropilin-1	NRP1		1	20	20	20	11	9	6	12	12	12	11	12	10	11	9	6	12	12	12	11	12	10	11	9	6	12	12	12	11	12	10	26.2	26.2	26.2	103.13	923	923	0	236.59	17.7	13.8	9.3
O14818;Q8TAA3	O14818	12;5	12;5	12;5	Proteasome subunit alpha type-7	PSMA7		2	12	12	12	7	8	6	4	7	7	8	6	5	7	8	6	4	7	7	8	6	5	7	8	6	4	7	7	8	6	5	59.7	59.7	59.7	27.887	248	248;256	0	103	37.9	46	31.9
O14907	O14907	2	2	2	Tax1-binding protein 3	TAX1BP3		1	2	2	2	0	0	0	1	0	2	1	1	1	0	0	0	1	0	2	1	1	1	0	0	0	1	0	2	1	1	1	25	25	25	13.735	124	124	0	6.2905	0	0	0
O14944	O14944	2	2	2	Proepiregulin;Epiregulin	EREG		1	2	2	2	1	2	2	0	1	1	0	2	2	1	2	2	0	1	1	0	2	2	1	2	2	0	1	1	0	2	2	10.1	10.1	10.1	19.044	169	169	0	5.6136	4.7	10.1	10.1
O15031	O15031	9	9	9	Plexin-B2	PLXNB2		1	9	9	9	3	2	1	3	1	5	2	2	1	3	2	1	3	1	5	2	2	1	3	2	1	3	1	5	2	2	1	6.2	6.2	6.2	205.12	1838	1838	0	22.817	1.6	1.3	0.4
O15143	O15143	12	12	12	Actin-related protein 2/3 complex subunit 1B	ARPC1B		1	12	12	12	9	3	2	4	4	4	9	5	3	9	3	2	4	4	4	9	5	3	9	3	2	4	4	4	9	5	3	32.5	32.5	32.5	40.949	372	372	0	108.55	23.1	11.3	8.6
O15144	O15144	9	9	9	Actin-related protein 2/3 complex subunit 2	ARPC2		1	9	9	9	5	3	5	4	6	3	4	4	3	5	3	5	4	6	3	4	4	3	5	3	5	4	6	3	4	4	3	28.7	28.7	28.7	34.333	300	300	0	47.325	19.7	10.3	17.3
O15145	O15145	5	5	5	Actin-related protein 2/3 complex subunit 3	ARPC3		1	5	5	5	2	4	4	2	2	2	3	2	2	2	4	4	2	2	2	3	2	2	2	4	4	2	2	2	3	2	2	25.8	25.8	25.8	20.546	178	178	0	20.897	16.3	20.2	20.2
O15230;Q16787	O15230	43;2	43;2	42;1	Laminin subunit alpha-5	LAMA5		2	43	43	42	31	2	1	22	6	5	31	5	7	31	2	1	22	6	5	31	5	7	30	2	1	22	6	5	30	5	7	14.7	14.7	14.5	399.73	3695	3695;3333	0	223.03	10.2	0.5	0.2
O15240	O15240	4	4	4	Neurosecretory protein VGF;Neuroendocrine regulatory peptide-1;Neuroendocrine regulatory peptide-2;Antimicrobial peptide VGF[554-577]	VGF		1	4	4	4	0	0	0	0	0	3	0	0	3	0	0	0	0	0	3	0	0	3	0	0	0	0	0	3	0	0	3	8.8	8.8	8.8	67.257	615	615	0	6.3471	0	0	0
O15371	O15371	2	2	2	Eukaryotic translation initiation factor 3 subunit D	EIF3D		1	2	2	2	0	0	0	0	0	0	1	0	1	0	0	0	0	0	0	1	0	1	0	0	0	0	0	0	1	0	1	3.6	3.6	3.6	63.972	548	548	0.0035461	2.7821	0	0	0
O15372	O15372	3	3	3	Eukaryotic translation initiation factor 3 subunit H	EIF3H		1	3	3	3	1	1	0	0	1	0	1	2	0	1	1	0	0	1	0	1	2	0	1	1	0	0	1	0	1	2	0	9.4	9.4	9.4	39.93	352	352	0	7.0785	2.6	2.6	0
O15375	O15375	1	1	1	Monocarboxylate transporter 6	SLC16A5		1	1	1	1	0	1	1	0	0	0	0	0	0	0	1	1	0	0	0	0	0	0	0	1	1	0	0	0	0	0	0	3	3	3	54.993	505	505	0	3.8699	0	3	3
O15399	O15399	1	1	1	Glutamate receptor ionotropic, NMDA 2D	GRIN2D		1	1	1	1	1	1	1	0	0	0	0	0	0	1	1	1	0	0	0	0	0	0	1	1	1	0	0	0	0	0	0	0.7	0.7	0.7	143.75	1336	1336	1	-2	0.7	0.7	0.7
O15460	O15460	1	1	1	Prolyl 4-hydroxylase subunit alpha-2	P4HA2		1	1	1	1	1	0	1	0	0	1	0	1	1	1	0	1	0	0	1	0	1	1	1	0	1	0	0	1	0	1	1	2.2	2.2	2.2	60.901	535	535	0	4.1071	2.2	0	2.2
O15511	O15511	3	3	3	Actin-related protein 2/3 complex subunit 5	ARPC5		1	3	3	3	1	3	1	1	1	1	2	0	0	1	3	1	1	1	1	2	0	0	1	3	1	1	1	1	2	0	0	22.5	22.5	22.5	16.32	151	151	0	8.5906	7.9	22.5	7.9
O43155	O43155	9	9	9	Leucine-rich repeat transmembrane protein FLRT2	FLRT2		1	9	9	9	2	2	0	2	3	3	1	2	5	2	2	0	2	3	3	1	2	5	2	2	0	2	3	3	1	2	5	16.5	16.5	16.5	74.048	660	660	0	24.619	3.8	4.4	0
O43237	O43237	2	2	2	Cytoplasmic dynein 1 light intermediate chain 2	DYNC1LI2		1	2	2	2	0	0	0	1	1	0	1	0	0	0	0	0	1	1	0	1	0	0	0	0	0	1	1	0	1	0	0	5.5	5.5	5.5	54.099	492	492	0	4.7809	0	0	0
O43286	O43286	2	2	2	Beta-1,4-galactosyltransferase 5	B4GALT5		1	2	2	2	2	2	2	2	1	1	2	2	2	2	2	2	2	1	1	2	2	2	2	2	2	2	1	1	2	2	2	2.6	2.6	2.6	45.118	388	388	0	5.5513	2.6	2.6	2.6
O43399	O43399	4	4	4	Tumor protein D54	TPD52L2		1	4	4	4	0	2	2	1	2	1	1	2	1	0	2	2	1	2	1	1	2	1	0	2	2	1	2	1	1	2	1	24.8	24.8	24.8	22.237	206	206	0	28.683	0	11.7	11.7
O43488;Q8NHP1	O43488;Q8NHP1	2;1	2;1	2;1	Aflatoxin B1 aldehyde reductase member 2;Aflatoxin B1 aldehyde reductase member 4	AKR7A2;AKR7L	;	2	2	2	2	0	1	0	0	1	0	0	2	1	0	1	0	0	1	0	0	2	1	0	1	0	0	1	0	0	2	1	7.2	7.2	7.2	39.589	359	359;331	0	11.371	0	4.2	0
O43493	O43493	3	3	3	Trans-Golgi network integral membrane protein 2	TGOLN2		1	3	3	3	2	0	0	0	0	0	2	0	0	2	0	0	0	0	0	2	0	0	2	0	0	0	0	0	2	0	0	7.1	7.1	7.1	51.112	480	480	0	9.0584	5.8	0	0
O43504	O43504	1	1	1	Ragulator complex protein LAMTOR5	LAMTOR5		1	1	1	1	0	0	0	0	0	0	0	1	0	0	0	0	0	0	0	0	1	0	0	0	0	0	0	0	0	1	0	22	22	22	9.6138	91	91	0.0035211	2.7357	0	0	0
O43505	O43505	8	8	8	Beta-1,4-glucuronyltransferase 1	B4GAT1		1	8	8	8	4	1	0	3	0	1	8	1	3	4	1	0	3	0	1	8	1	3	4	1	0	3	0	1	8	1	3	18.8	18.8	18.8	47.119	415	415	0	52.778	11.1	3.9	0
O43556	O43556	5	5	5	Epsilon-sarcoglycan	SGCE		1	5	5	5	3	0	0	2	2	0	4	2	2	3	0	0	2	2	0	4	2	2	3	0	0	2	2	0	4	2	2	15.8	15.8	15.8	49.85	437	437	0	72.027	12.1	0	0
O43570	O43570	3	3	3	Carbonic anhydrase 12	CA12		1	3	3	3	1	1	1	1	0	1	0	2	0	1	1	1	1	0	1	0	2	0	1	1	1	1	0	1	0	2	0	10.7	10.7	10.7	39.45	354	354	0	10.126	4.2	2.5	2.5
O43707	O43707	65	65	43	Alpha-actinin-4	ACTN4		1	65	65	43	51	42	28	40	46	34	48	46	37	51	42	28	40	46	34	48	46	37	32	25	14	24	28	19	29	28	22	70.1	70.1	48.5	104.85	911	911	0	323.31	61.9	52.9	33
O43765	O43765	4	4	4	Small glutamine-rich tetratricopeptide repeat-containing protein alpha	SGTA		1	4	4	4	0	3	0	0	0	1	2	0	0	0	3	0	0	0	1	2	0	0	0	3	0	0	0	1	2	0	0	15.7	15.7	15.7	34.063	313	313	0	8.2591	0	11.5	0
O43776	O43776	4	4	4	Asparagine--tRNA ligase, cytoplasmic	NARS		1	4	4	4	0	1	0	0	2	0	0	2	2	0	1	0	0	2	0	0	2	2	0	1	0	0	2	0	0	2	2	7.1	7.1	7.1	62.942	548	548	0	18.148	0	2.4	0
O43852	O43852	22	22	22	Calumenin	CALU		1	22	22	22	21	15	12	11	17	11	13	14	13	21	15	12	11	17	11	13	14	13	21	15	12	11	17	11	13	14	13	59.4	59.4	59.4	37.106	315	315	0	322.23	56.5	43.5	37.5
O43854	O43854	4	4	4	EGF-like repeat and discoidin I-like domain-containing protein 3	EDIL3		1	4	4	4	0	0	0	2	0	0	3	0	0	0	0	0	2	0	0	3	0	0	0	0	0	2	0	0	3	0	0	7.9	7.9	7.9	53.764	480	480	0	5.2623	0	0	0
O60279	O60279	4	4	4	Sushi domain-containing protein 5	SUSD5		1	4	4	4	4	0	0	2	0	0	1	0	0	4	0	0	2	0	0	1	0	0	4	0	0	2	0	0	1	0	0	12.9	12.9	12.9	68.02	629	629	0	15.498	12.9	0	0
O60462	O60462	15	15	15	Neuropilin-2	NRP2		1	15	15	15	0	9	4	0	11	7	0	12	8	0	9	4	0	11	7	0	12	8	0	9	4	0	11	7	0	12	8	18	18	18	104.86	931	931	0	37.926	0	11.1	4.6
O60469	O60469	1	1	1	Down syndrome cell adhesion molecule	DSCAM		1	1	1	1	0	0	0	0	0	0	0	0	1	0	0	0	0	0	0	0	0	1	0	0	0	0	0	0	0	0	1	0.3	0.3	0.3	222.26	2012	2012	1	-2	0	0	0
O60493	O60493	7	7	6	Sorting nexin-3	SNX3		1	7	7	6	0	4	2	0	1	2	1	4	1	0	4	2	0	1	2	1	4	1	0	3	2	0	1	2	1	4	1	37.7	37.7	33.3	18.762	162	162	0	11.945	0	22.2	11.7
O60506	O60506	13	13	8	Heterogeneous nuclear ribonucleoprotein Q	SYNCRIP		1	13	13	8	6	6	1	1	3	1	8	9	2	6	6	1	1	3	1	8	9	2	2	4	1	1	2	1	4	7	2	18.9	18.9	12.4	69.602	623	623	0	28.98	8.3	9.6	2.1
O60512	O60512	3	3	3	Beta-1,4-galactosyltransferase 3;N-acetyllactosamine synthase;Beta-N-acetylglucosaminylglycopeptide beta-1,4-galactosyltransferase;Beta-N-acetylglucosaminyl-glycolipid beta-1,4-galactosyltransferase	B4GALT3		1	3	3	3	1	0	1	0	1	1	1	2	1	1	0	1	0	1	1	1	2	1	1	0	1	0	1	1	1	2	1	6.9	6.9	6.9	43.927	393	393	0	5.9904	3.1	0	3.1
O60513	O60513	3	3	3	Beta-1,4-galactosyltransferase 4;N-acetyllactosamine synthase;Lactotriaosylceramide beta-1,4-galactosyltransferase	B4GALT4		1	3	3	3	2	0	0	1	2	0	0	1	1	2	0	0	1	2	0	0	1	1	2	0	0	1	2	0	0	1	1	8.4	8.4	8.4	40.041	344	344	0	16.313	8.4	0	0
O60565	O60565	18	18	17	Gremlin-1	GREM1		1	18	18	17	10	12	6	4	10	9	6	13	13	10	12	6	4	10	9	6	13	13	9	11	5	3	9	8	5	12	12	71.7	71.7	64.7	20.697	184	184	0	323.31	66.8	58.2	43.5
O60568	O60568	31	31	31	Procollagen-lysine,2-oxoglutarate 5-dioxygenase 3	PLOD3		1	31	31	31	24	12	11	20	12	13	20	14	12	24	12	11	20	12	13	20	14	12	24	12	11	20	12	13	20	14	12	43.9	43.9	43.9	84.784	738	738	0	161.69	30.4	18.2	18.2
O60664	O60664	6	6	6	Perilipin-3	PLIN3		1	6	6	6	5	4	3	3	4	3	1	6	4	5	4	3	3	4	3	1	6	4	5	4	3	3	4	3	1	6	4	21.9	21.9	21.9	47.074	434	434	0	133.84	17.7	13.6	10.8
O60687	O60687	19	19	19	Sushi repeat-containing protein SRPX2	SRPX2		1	19	19	19	10	11	7	5	11	8	10	8	8	10	11	7	5	11	8	10	8	8	10	11	7	5	11	8	10	8	8	42.2	42.2	42.2	52.971	465	465	0	113.72	26.9	28.6	19.6
O60701	O60701	11	11	11	UDP-glucose 6-dehydrogenase	UGDH		1	11	11	11	0	6	2	1	8	4	4	5	4	0	6	2	1	8	4	4	5	4	0	6	2	1	8	4	4	5	4	24.1	24.1	24.1	55.023	494	494	0	71.856	0	11.3	4.5
O60711	O60711	1	1	1	Leupaxin	LPXN		1	1	1	1	0	0	1	0	1	0	0	0	0	0	0	1	0	1	0	0	0	0	0	0	1	0	1	0	0	0	0	4.4	4.4	4.4	43.332	386	386	0.00076161	3.6818	0	0	4.4
O60749	O60749	2	2	2	Sorting nexin-2	SNX2		1	2	2	2	0	0	0	0	0	0	0	2	0	0	0	0	0	0	0	0	2	0	0	0	0	0	0	0	0	2	0	4.8	4.8	4.8	58.47	519	519	0	8.2984	0	0	0
O60763	O60763	4	4	4	General vesicular transport factor p115	USO1		1	4	4	4	0	0	0	0	3	1	2	1	1	0	0	0	0	3	1	2	1	1	0	0	0	0	3	1	2	1	1	5.2	5.2	5.2	107.89	962	962	0	7.525	0	0	0
O60869	O60869	1	1	1	Endothelial differentiation-related factor 1	EDF1		1	1	1	1	0	1	1	0	1	0	0	0	0	0	1	1	0	1	0	0	0	0	0	1	1	0	1	0	0	0	0	10.1	10.1	10.1	16.368	148	148	0.0034843	2.6055	0	10.1	10.1
O60888	O60888	1	1	1	Protein CutA	CUTA		1	1	1	1	0	0	0	0	1	0	0	1	0	0	0	0	0	1	0	0	1	0	0	0	0	0	1	0	0	1	0	7.8	7.8	7.8	19.116	179	179	0	5.4987	0	0	0
O75063	O75063	2	2	2	Glycosaminoglycan xylosylkinase	FAM20B		1	2	2	2	1	0	0	0	0	0	1	0	0	1	0	0	0	0	0	1	0	0	1	0	0	0	0	0	1	0	0	5.4	5.4	5.4	46.432	409	409	0.0022026	3.2274	2.2	0	0
O75083	O75083	27	27	27	WD repeat-containing protein 1	WDR1		1	27	27	27	12	16	12	13	15	12	13	16	12	12	16	12	13	15	12	13	16	12	12	16	12	13	15	12	13	16	12	52.8	52.8	52.8	66.193	606	606	0	302.91	23.4	32.5	22.4
O75093	O75093	2	1	1	Slit homolog 1 protein	SLIT1		1	2	1	1	1	0	0	1	0	1	0	0	1	0	0	0	0	0	1	0	0	1	0	0	0	0	0	1	0	0	1	1.3	0.6	0.6	167.92	1534	1534	0.0053298	2.1887	0.7	0	0
O75095	O75095	4	4	4	Multiple epidermal growth factor-like domains protein 6	MEGF6		1	4	4	4	3	0	0	2	0	0	3	0	0	3	0	0	2	0	0	3	0	0	3	0	0	2	0	0	3	0	0	3.7	3.7	3.7	161.18	1541	1541	0	19.075	3.1	0	0
O75131	O75131	1	1	1	Copine-3	CPNE3		1	1	1	1	0	1	0	0	1	0	0	1	0	0	1	0	0	1	0	0	1	0	0	1	0	0	1	0	0	1	0	2.4	2.4	2.4	60.13	537	537	0	4.497	0	2.4	0
O75144	O75144	2	2	2	ICOS ligand	ICOSLG		1	2	2	2	2	1	1	1	1	1	1	0	1	2	1	1	1	1	1	1	0	1	2	1	1	1	1	1	1	0	1	6.6	6.6	6.6	33.348	302	302	0	9.4259	6.6	3.3	3.3
O75173	O75173	15	15	15	A disintegrin and metalloproteinase with thrombospondin motifs 4	ADAMTS4		1	15	15	15	2	5	5	1	7	10	1	9	9	2	5	5	1	7	10	1	9	9	2	5	5	1	7	10	1	9	9	23.8	23.8	23.8	90.196	837	837	0	219.43	4.4	7.8	8.5
O75326	O75326	46	46	46	Semaphorin-7A	SEMA7A		1	46	46	46	32	36	35	25	31	37	25	37	36	32	36	35	25	31	37	25	37	36	32	36	35	25	31	37	25	37	36	54.4	54.4	54.4	74.823	666	666	0	323.31	45	45.5	48.3
O75340	O75340	2	2	2	Programmed cell death protein 6	PDCD6		1	2	2	2	1	0	0	1	0	1	2	1	0	1	0	0	1	0	1	2	1	0	1	0	0	1	0	1	2	1	0	11	11	11	21.868	191	191	0	7.5325	5.2	0	0
O75347	O75347	8	8	8	Tubulin-specific chaperone A	TBCA		1	8	8	8	4	3	3	2	1	3	4	3	1	4	3	3	2	1	3	4	3	1	4	3	3	2	1	3	4	3	1	39.8	39.8	39.8	12.855	108	108	0	42.366	30.6	21.3	21.3
O75368	O75368	6	6	6	SH3 domain-binding glutamic acid-rich-like protein	SH3BGRL		1	6	6	6	3	2	1	1	4	0	3	3	3	3	2	1	1	4	0	3	3	3	3	2	1	1	4	0	3	3	3	46.5	46.5	46.5	12.774	114	114	0	17.222	32.5	21.1	8.8
O75369	O75369	43	32	32	Filamin-B	FLNB		1	43	32	32	15	16	6	13	17	9	17	21	11	9	10	2	7	10	3	10	13	5	9	10	2	7	10	3	10	13	5	20.8	17.3	17.3	278.16	2602	2602	0	127.49	6.5	7.9	2.7
O75396	O75396	1	1	1	Vesicle-trafficking protein SEC22b	SEC22B		1	1	1	1	0	0	0	0	0	0	1	0	0	0	0	0	0	0	0	1	0	0	0	0	0	0	0	0	1	0	0	6.5	6.5	6.5	24.593	215	215	0.0021866	3.095	0	0	0
O75475	O75475	2	1	1	PC4 and SFRS1-interacting protein	PSIP1		1	2	1	1	0	0	0	0	1	0	1	2	1	0	0	0	0	1	0	1	1	0	0	0	0	0	1	0	1	1	0	3.6	2.1	2.1	60.103	530	530	0.003592	2.9068	0	0	0
O75503	O75503	5	5	5	Ceroid-lipofuscinosis neuronal protein 5	CLN5		1	5	5	5	1	0	0	0	1	1	3	1	3	1	0	0	0	1	1	3	1	3	1	0	0	0	1	1	3	1	3	13.1	13.1	13.1	41.496	358	358	0	7.526	2.5	0	0
O75509	O75509	2	2	2	Tumor necrosis factor receptor superfamily member 21	TNFRSF21		1	2	2	2	1	0	0	1	1	1	1	0	1	1	0	0	1	1	1	1	0	1	1	0	0	1	1	1	1	0	1	3.2	3.2	3.2	71.844	655	655	0	5.7454	1.8	0	0
O75531	O75531	2	2	2	Barrier-to-autointegration factor;Barrier-to-autointegration factor, N-terminally processed	BANF1		1	2	2	2	1	1	1	0	1	0	1	1	0	1	1	1	0	1	0	1	1	0	1	1	1	0	1	0	1	1	0	20.2	20.2	20.2	10.058	89	89	0	3.8312	12.4	12.4	12.4
O75534	O75534	5	5	5	Cold shock domain-containing protein E1	CSDE1		1	5	5	5	0	1	1	0	2	0	2	2	1	0	1	1	0	2	0	2	2	1	0	1	1	0	2	0	2	2	1	6.4	6.4	6.4	88.884	798	798	0	10.455	0	1.4	1.4
O75635	O75635	12	12	12	Serpin B7	SERPINB7		1	12	12	12	7	0	1	10	1	0	9	1	1	7	0	1	10	1	0	9	1	1	7	0	1	10	1	0	9	1	1	34.2	34.2	34.2	42.904	380	380	0	76.136	20	0	2.6
O75718	O75718	10	10	10	Cartilage-associated protein	CRTAP		1	10	10	10	5	7	7	5	7	5	6	6	6	5	7	7	5	7	5	6	6	6	5	7	7	5	7	5	6	6	6	21.7	21.7	21.7	46.561	401	401	0	32.061	10	15.5	15.2
O75787	O75787	10	10	10	Renin receptor	ATP6AP2		1	10	10	10	4	5	3	3	5	3	3	4	4	4	5	3	3	5	3	3	4	4	4	5	3	3	5	3	3	4	4	29.1	29.1	29.1	39.008	350	350	0	33.019	10.6	17.7	8.3
O75821	O75821	3	3	3	Eukaryotic translation initiation factor 3 subunit G	EIF3G		1	3	3	3	0	2	1	0	2	1	0	2	1	0	2	1	0	2	1	0	2	1	0	2	1	0	2	1	0	2	1	11.9	11.9	11.9	35.611	320	320	0	13.742	0	6.9	2.8
O75828	O75828	5	2	2	Carbonyl reductase [NADPH] 3	CBR3		1	5	2	2	2	3	4	3	5	3	2	4	2	0	2	2	1	2	1	0	1	1	0	2	2	1	2	1	0	1	1	19.1	5.8	5.8	30.85	277	277	0	4.0575	7.6	10.5	14.4
O75832	O75832	3	3	3	26S proteasome non-ATPase regulatory subunit 10	PSMD10		1	3	3	3	1	0	1	0	0	1	0	1	0	1	0	1	0	0	1	0	1	0	1	0	1	0	0	1	0	1	0	15	15	15	24.428	226	226	0	4.6046	7.5	0	4
O75874;P48735	O75874	6;1	6;1	6;1	Isocitrate dehydrogenase [NADP] cytoplasmic	IDH1		2	6	6	6	3	2	2	3	3	4	3	3	3	3	2	2	3	3	4	3	3	3	3	2	2	3	3	4	3	3	3	12.1	12.1	12.1	46.659	414	414;452	0	14.556	7.5	4.8	4.8
O75882	O75882	15	15	15	Attractin	ATRN		1	15	15	15	13	6	4	10	6	5	11	2	7	13	6	4	10	6	5	11	2	7	13	6	4	10	6	5	11	2	7	11.8	11.8	11.8	158.54	1429	1429	0	147.28	10.4	5.3	3.1
O75886	O75886	1	1	1	Signal transducing adapter molecule 2	STAM2		1	1	1	1	0	0	0	0	0	0	0	1	0	0	0	0	0	0	0	0	1	0	0	0	0	0	0	0	0	1	0	2.7	2.7	2.7	58.164	525	525	0.00076511	3.7685	0	0	0
O75937	O75937	2	2	2	DnaJ homolog subfamily C member 8	DNAJC8		1	2	2	2	1	1	0	0	0	0	1	1	0	1	1	0	0	0	0	1	1	0	1	1	0	0	0	0	1	1	0	6.3	6.3	6.3	29.841	253	253	0.0022091	3.2676	3.2	3.2	0
O75955	O75955	1	1	1	Flotillin-1	FLOT1		1	1	1	1	0	0	0	0	1	0	0	0	0	0	0	0	0	1	0	0	0	0	0	0	0	0	1	0	0	0	0	3	3	3	47.355	427	427	1	-2	0	0	0
O75976	O75976	6	6	6	Carboxypeptidase D	CPD		1	6	6	6	2	1	0	1	1	0	1	4	2	2	1	0	1	1	0	1	4	2	2	1	0	1	1	0	1	4	2	4	4	4	152.93	1380	1380	0	17.065	1.4	0.5	0
O76003	O76003	4	4	4	Glutaredoxin-3	GLRX3		1	4	4	4	0	2	0	0	0	1	0	3	0	0	2	0	0	0	1	0	3	0	0	2	0	0	0	1	0	3	0	18.5	18.5	18.5	37.432	335	335	0	10.274	0	6.9	0
O76061	O76061	7	7	7	Stanniocalcin-2	STC2		1	7	7	7	6	0	0	4	0	0	6	0	0	6	0	0	4	0	0	6	0	0	6	0	0	4	0	0	6	0	0	24.8	24.8	24.8	33.248	302	302	0	65.227	24.5	0	0
O94760	O94760	7	7	6	N(G),N(G)-dimethylarginine dimethylaminohydrolase 1	DDAH1		1	7	7	6	0	0	0	1	1	2	4	1	2	0	0	0	1	1	2	4	1	2	0	0	0	1	1	2	3	1	2	28.1	28.1	25.3	31.121	285	285	0	13.633	0	0	0
O94766;Q9NPZ5	O94766	6;1	6;1	6;1	Galactosylgalactosylxylosylprotein 3-beta-glucuronosyltransferase 3	B3GAT3		2	6	6	6	1	2	1	2	4	2	3	3	3	1	2	1	2	4	2	3	3	3	1	2	1	2	4	2	3	3	3	18.8	18.8	18.8	37.121	335	335;323	0	15.318	3	5.1	2.1
O94813	O94813	41	41	40	Slit homolog 2 protein;Slit homolog 2 protein N-product;Slit homolog 2 protein C-product	SLIT2		1	41	41	40	32	0	0	25	1	1	29	2	0	32	0	0	25	1	1	29	2	0	31	0	0	24	1	1	29	2	0	28.2	28.2	28.2	169.87	1529	1529	0	266.41	23.6	0	0
O94855	O94855	2	2	2	Protein transport protein Sec24D	SEC24D		1	2	2	2	0	0	0	0	1	0	0	1	0	0	0	0	0	1	0	0	1	0	0	0	0	0	1	0	0	1	0	3.1	3.1	3.1	113.01	1032	1032	0	3.905	0	0	0
O94856	O94856	10	10	10	Neurofascin	NFASC		1	10	10	10	5	3	1	5	4	2	4	4	3	5	3	1	5	4	2	4	4	3	5	3	1	5	4	2	4	4	3	8	8	8	150.02	1347	1347	0	35.518	4.8	3	0.7
O94907;Q9UBU2	O94907	11;2	11;2	11;2	Dickkopf-related protein 1	DKK1		2	11	11	11	8	0	0	10	1	0	7	1	2	8	0	0	10	1	0	7	1	2	8	0	0	10	1	0	7	1	2	34.2	34.2	34.2	28.671	266	266;259	0	97.84	25.6	0	0
O94979	O94979	8	8	8	Protein transport protein Sec31A	SEC31A		1	8	8	8	1	2	0	1	4	1	3	3	4	1	2	0	1	4	1	3	3	4	1	2	0	1	4	1	3	3	4	6.1	6.1	6.1	133.01	1220	1220	0	15.16	0.6	1.3	0
O94985	O94985	46	46	46	Calsyntenin-1;Soluble Alc-alpha;CTF1-alpha	CLSTN1		1	46	46	46	34	21	18	35	25	23	32	23	30	34	21	18	35	25	23	32	23	30	34	21	18	35	25	23	32	23	30	33.6	33.6	33.6	109.79	981	981	0	323.31	29.8	21.8	16.6
O95084	O95084	9	9	9	Serine protease 23	PRSS23		1	9	9	9	9	0	1	5	0	1	4	0	0	9	0	1	5	0	1	4	0	0	9	0	1	5	0	1	4	0	0	33.2	33.2	33.2	43.001	383	383	0	41.886	33.2	0	3.4
O95150	O95150	1	1	1	Tumor necrosis factor ligand superfamily member 15;Tumor necrosis factor ligand superfamily member 15, membrane form;Tumor necrosis factor ligand superfamily member 15, secreted form	TNFSF15		1	1	1	1	0	0	0	0	0	0	0	1	0	0	0	0	0	0	0	0	1	0	0	0	0	0	0	0	0	1	0	7.2	7.2	7.2	28.087	251	251	0	4.407	0	0	0
O95248	O95248	2	2	2	Myotubularin-related protein 5	SBF1		1	2	2	2	0	0	0	0	0	0	0	0	2	0	0	0	0	0	0	0	0	2	0	0	0	0	0	0	0	0	2	1.3	1.3	1.3	208.31	1867	1867	0.00538	2.2924	0	0	0
O95274	O95274	2	2	2	Ly6/PLAUR domain-containing protein 3	LYPD3		1	2	2	2	2	0	1	0	0	1	1	0	1	2	0	1	0	0	1	1	0	1	2	0	1	0	0	1	1	0	1	8.4	8.4	8.4	35.97	346	346	0	4.1371	8.4	0	2.9
O95302;Q75LS8	O95302	4;1	4;1	4;1	Peptidyl-prolyl cis-trans isomerase FKBP9	FKBP9		2	4	4	4	3	0	1	1	1	1	3	1	1	3	0	1	1	1	1	3	1	1	3	0	1	1	1	1	3	1	1	6.7	6.7	6.7	63.083	570	570;142	0	7.7612	5.1	0	1.6
O95336	O95336	8	8	8	6-phosphogluconolactonase	PGLS		1	8	8	8	5	3	2	2	5	3	6	5	3	5	3	2	2	5	3	6	5	3	5	3	2	2	5	3	6	5	3	37.6	37.6	37.6	27.547	258	258	0	22.342	23.6	12.8	9.3
O95373	O95373	1	1	1	Importin-7	IPO7		1	1	1	1	0	0	1	0	0	0	0	0	1	0	0	1	0	0	0	0	0	1	0	0	1	0	0	0	0	0	1	0.9	0.9	0.9	119.52	1038	1038	0.0041152	2.4419	0	0	0.9
O95394	O95394	2	2	2	Phosphoacetylglucosamine mutase	PGM3		1	2	2	2	0	0	1	1	2	1	1	2	2	0	0	1	1	2	1	1	2	2	0	0	1	1	2	1	1	2	2	3.9	3.9	3.9	59.851	542	542	0	6.9597	0	0	2.4
O95399	O95399	1	1	1	Urotensin-2	UTS2		1	1	1	1	1	1	1	1	1	1	1	1	1	1	1	1	1	1	1	1	1	1	1	1	1	1	1	1	1	1	1	6.5	6.5	6.5	14.295	124	124	0.0035486	2.7929	6.5	6.5	6.5
O95433	O95433	1	1	1	Activator of 90 kDa heat shock protein ATPase homolog 1	AHSA1		1	1	1	1	0	0	1	0	1	0	0	1	0	0	0	1	0	1	0	0	1	0	0	0	1	0	1	0	0	1	0	3.6	3.6	3.6	38.274	338	338	0.0066401	2.172	0	0	3.6
O95450	O95450	1	1	1	A disintegrin and metalloproteinase with thrombospondin motifs 2	ADAMTS2		1	1	1	1	1	0	0	0	0	0	0	0	0	1	0	0	0	0	0	0	0	0	1	0	0	0	0	0	0	0	0	0.9	0.9	0.9	134.75	1211	1211	0.0034941	2.6348	0.9	0	0
O95477	O95477	1	1	1	ATP-binding cassette sub-family A member 1	ABCA1		1	1	1	1	0	1	0	0	0	0	0	0	0	0	1	0	0	0	0	0	0	0	0	1	0	0	0	0	0	0	0	0.4	0.4	0.4	254.3	2261	2261	1	-2	0	0.4	0
O95502	O95502	2	2	2	Neuronal pentraxin receptor	NPTXR		1	2	2	2	0	0	0	0	0	1	0	1	1	0	0	0	0	0	1	0	1	1	0	0	0	0	0	1	0	1	1	5.6	5.6	5.6	52.846	500	500	0	4.9558	0	0	0
O95613	O95613	1	1	1	Pericentrin	PCNT		1	1	1	1	0	0	0	1	0	0	0	0	0	0	0	0	1	0	0	0	0	0	0	0	0	1	0	0	0	0	0	0.4	0.4	0.4	378.03	3336	3336	1	-2	0	0	0
O95747	O95747	1	1	1	Serine/threonine-protein kinase OSR1	OXSR1		1	1	1	1	0	0	0	0	1	1	0	1	1	0	0	0	0	1	1	0	1	1	0	0	0	0	1	1	0	1	1	1.5	1.5	1.5	58.022	527	527	0.0041209	2.4507	0	0	0
O95782;O94973	O95782	6;2	6;2	6;2	AP-2 complex subunit alpha-1	AP2A1		2	6	6	6	3	2	1	2	2	3	4	1	1	3	2	1	2	2	3	4	1	1	3	2	1	2	2	3	4	1	1	5.5	5.5	5.5	107.54	977	977;939	0	9.7835	2.8	1.9	0.9
O95793	O95793	1	1	1	Double-stranded RNA-binding protein Staufen homolog 1	STAU1		1	1	1	1	0	0	0	0	1	0	0	1	0	0	0	0	0	1	0	0	1	0	0	0	0	0	1	0	0	1	0	2.8	2.8	2.8	63.182	577	577	0	4.0853	0	0	0
O95816	O95816	5	5	5	BAG family molecular chaperone regulator 2	BAG2		1	5	5	5	1	0	0	1	1	0	3	1	1	1	0	0	1	1	0	3	1	1	1	0	0	1	1	0	3	1	1	23.7	23.7	23.7	23.772	211	211	0	8.7863	4.3	0	0
O95817	O95817	1	1	1	BAG family molecular chaperone regulator 3	BAG3		1	1	1	1	1	0	0	0	0	0	1	0	1	1	0	0	0	0	0	1	0	1	1	0	0	0	0	0	1	0	1	2.3	2.3	2.3	61.594	575	575	0	13.289	2.3	0	0
O95865	O95865	2	1	1	N(G),N(G)-dimethylarginine dimethylaminohydrolase 2	DDAH2		1	2	1	1	0	0	0	0	1	0	1	1	0	0	0	0	0	1	0	0	1	0	0	0	0	0	1	0	0	1	0	8.4	5.6	5.6	29.644	285	285	0	4.0586	0	0	0
O95881	O95881	3	3	3	Thioredoxin domain-containing protein 12	TXNDC12		1	3	3	3	3	2	1	1	2	1	2	1	0	3	2	1	1	2	1	2	1	0	3	2	1	1	2	1	2	1	0	14.5	14.5	14.5	19.206	172	172	0	5.1332	14.5	9.3	5.2
O95954	O95954	1	1	1	Formimidoyltransferase-cyclodeaminase;Glutamate formimidoyltransferase;Formimidoyltetrahydrofolate cyclodeaminase	FTCD		1	1	1	1	0	0	1	0	1	0	0	0	1	0	0	1	0	1	0	0	0	1	0	0	1	0	1	0	0	0	1	2.4	2.4	2.4	58.926	541	541	1	-2	0	0	2.4
O95965	O95965	4	4	4	Integrin beta-like protein 1	ITGBL1		1	4	4	4	3	0	0	3	0	0	3	0	0	3	0	0	3	0	0	3	0	0	3	0	0	3	0	0	3	0	0	11.7	11.7	11.7	53.921	494	494	0	30.107	8.3	0	0
O95967	O95967	14	14	14	EGF-containing fibulin-like extracellular matrix protein 2	EFEMP2		1	14	14	14	12	0	3	9	2	3	9	2	2	12	0	3	9	2	3	9	2	2	12	0	3	9	2	3	9	2	2	35.2	35.2	35.2	49.405	443	443	0	96.504	33.4	0	6.1
O95980	O95980	6	6	6	Reversion-inducing cysteine-rich protein with Kazal motifs	RECK		1	6	6	6	4	1	0	2	0	0	4	1	1	4	1	0	2	0	0	4	1	1	4	1	0	2	0	0	4	1	1	5.3	5.3	5.3	106.46	971	971	0	10.844	4.1	1.1	0
O95985	O95985	1	1	1	DNA topoisomerase 3-beta-1	TOP3B		1	1	1	1	0	1	0	0	1	0	0	0	0	0	1	0	0	1	0	0	0	0	0	1	0	0	1	0	0	0	0	1.5	1.5	1.5	96.661	862	862	1	-2	0	1.5	0
O96000	O96000	1	1	1	NADH dehydrogenase [ubiquinone] 1 beta subcomplex subunit 10	NDUFB10		1	1	1	1	0	0	1	0	0	0	1	0	0	0	0	1	0	0	0	1	0	0	0	0	1	0	0	0	1	0	0	5.8	5.8	5.8	20.776	172	172	1	-2	0	0	5.8
P00338;Q6ZMR3;P07864	P00338	24;2;1	24;2;1	22;1;0	L-lactate dehydrogenase A chain	LDHA		3	24	24	22	21	17	13	13	12	10	16	15	11	21	17	13	13	12	10	16	15	11	20	16	12	11	11	10	14	14	10	61.4	61.4	57.5	36.688	332	332;332;332	0	257.47	55.7	48.8	33.7
P00352;P05091;P47895;P30837;O94788	P00352	9;2;1;1;1	9;2;1;1;1	9;2;1;1;1	Retinal dehydrogenase 1	ALDH1A1		5	9	9	9	4	1	2	2	2	1	5	1	0	4	1	2	2	2	1	5	1	0	4	1	2	2	2	1	5	1	0	21.4	21.4	21.4	54.861	501	501;517;512;517;518	0	18.492	9.2	1.8	4
P00390	P00390	5	5	5	Glutathione reductase, mitochondrial	GSR		1	5	5	5	2	1	0	3	2	0	3	4	1	2	1	0	3	2	0	3	4	1	2	1	0	3	2	0	3	4	1	10.5	10.5	10.5	56.256	522	522	0	10.628	4.6	2.1	0
P00441	P00441	14	14	14	Superoxide dismutase [Cu-Zn]	SOD1		1	14	14	14	8	4	4	9	9	6	9	7	5	8	4	4	9	9	6	9	7	5	8	4	4	9	9	6	9	7	5	97.4	97.4	97.4	15.936	154	154	0	254.93	66.9	42.9	51.3
P00491	P00491	5	5	5	Purine nucleoside phosphorylase	PNP		1	5	5	5	2	1	2	2	5	3	2	4	3	2	1	2	2	5	3	2	4	3	2	1	2	2	5	3	2	4	3	20.8	20.8	20.8	32.118	289	289	0	27.424	6.6	3.5	7.3
P00492;Q9NRG1	P00492;Q9NRG1	2;1	2;1	2;1	Hypoxanthine-guanine phosphoribosyltransferase;Phosphoribosyltransferase domain-containing protein 1	HPRT1;PRTFDC1	;	2	2	2	2	0	1	0	1	1	0	0	1	0	0	1	0	1	1	0	0	1	0	0	1	0	1	1	0	0	1	0	10.6	10.6	10.6	24.579	218	218;225	0	3.8363	0	7.3	0
P00505	P00505	7	7	7	Aspartate aminotransferase, mitochondrial	GOT2		1	7	7	7	5	0	0	1	2	0	4	1	0	5	0	0	1	2	0	4	1	0	5	0	0	1	2	0	4	1	0	24	24	24	47.517	430	430	0	45.812	16.5	0	0
P00533	P00533	5	5	5	Epidermal growth factor receptor	EGFR		1	5	5	5	0	0	0	0	1	2	3	2	1	0	0	0	0	1	2	3	2	1	0	0	0	0	1	2	3	2	1	4.7	4.7	4.7	134.28	1210	1210	0	8.4919	0	0	0
P00558;P07205	P00558	29;3	29;3	29;3	Phosphoglycerate kinase 1	PGK1		2	29	29	29	18	16	16	17	19	16	18	19	17	18	16	16	17	19	16	18	19	17	18	16	16	17	19	16	18	19	17	66.9	66.9	66.9	44.614	417	417;417	0	323.31	48.9	42.9	42.7
P00568	P00568	2	2	2	Adenylate kinase isoenzyme 1	AK1		1	2	2	2	0	1	0	1	0	1	1	1	0	0	1	0	1	0	1	1	1	0	0	1	0	1	0	1	1	1	0	17.5	17.5	17.5	21.635	194	194	0.00074074	3.3931	0	5.7	0
P00736	P00736	34	34	33	Complement C1r subcomponent;Complement C1r subcomponent heavy chain;Complement C1r subcomponent light chain	C1R		1	34	34	33	27	1	2	25	6	6	23	3	9	27	1	2	25	6	6	23	3	9	26	1	2	24	6	6	22	3	9	44.8	44.8	43.5	80.118	705	705	0	286.11	35.6	1.4	2.6
P00742	P00742	3	3	3	Coagulation factor X;Factor X light chain;Factor X heavy chain;Activated factor Xa heavy chain	F10		1	3	3	3	2	0	0	2	0	0	2	0	0	2	0	0	2	0	0	2	0	0	2	0	0	2	0	0	2	0	0	6.6	6.6	6.6	54.731	488	488	0	5.3113	4.1	0	0
P00749	P00749	28	28	28	Urokinase-type plasminogen activator;Urokinase-type plasminogen activator long chain A;Urokinase-type plasminogen activator short chain A;Urokinase-type plasminogen activator chain B	PLAU		1	28	28	28	4	16	21	4	15	18	3	19	24	4	16	21	4	15	18	3	19	24	4	16	21	4	15	18	3	19	24	58.7	58.7	58.7	48.507	431	431	0	323.31	13	40.6	48.3
P00750	P00750	17	17	17	Tissue-type plasminogen activator;Tissue-type plasminogen activator chain A;Tissue-type plasminogen activator chain B	PLAT		1	17	17	17	10	12	7	8	9	6	7	12	10	10	12	7	8	9	6	7	12	10	10	12	7	8	9	6	7	12	10	38.3	38.3	38.3	62.916	562	562	0	176.32	27.6	26.7	16
P00966	P00966	7	7	7	Argininosuccinate synthase	ASS1		1	7	7	7	0	1	1	1	5	3	2	3	3	0	1	1	1	5	3	2	3	3	0	1	1	1	5	3	2	3	3	16.3	16.3	16.3	46.53	412	412	0	20.064	0	1.7	2.2
P01009	P01009	6	6	6	Alpha-1-antitrypsin;Short peptide from AAT	SERPINA1		1	6	6	6	0	1	4	0	3	4	0	3	4	0	1	4	0	3	4	0	3	4	0	1	4	0	3	4	0	3	4	13.6	13.6	13.6	46.736	418	418	0	17.315	0	2.4	11.2
P01023	P01023	15	5	5	Alpha-2-macroglobulin	A2M		1	15	5	5	10	5	3	9	6	8	9	7	10	3	0	0	1	0	1	2	0	1	3	0	0	1	0	1	2	0	1	9	3.7	3.7	163.29	1474	1474	0	13.475	5.2	2.8	2.2
P01024;O95568	P01024	61;1	51;1	51;1	Complement C3;Complement C3 beta chain;C3-beta-c;Complement C3 alpha chain;C3a anaphylatoxin;Acylation stimulating protein;Complement C3b alpha chain;Complement C3c alpha chain fragment 1;Complement C3dg fragment;Complement C3g fragment;Complement C3d fragment;Complement C3f fragment;Complement C3c alpha chain fragment 2	C3		2	61	51	51	43	23	14	24	28	19	42	28	25	39	17	8	15	21	13	36	21	16	39	17	8	15	21	13	36	21	16	34.2	30.8	30.8	187.15	1663	1663;372	0	292.73	26.9	14.1	9
P01033	P01033	20	20	20	Metalloproteinase inhibitor 1	TIMP1		1	20	20	20	14	18	16	11	19	16	10	20	18	14	18	16	11	19	16	10	20	18	14	18	16	11	19	16	10	20	18	78.3	78.3	78.3	23.171	207	207	0	323.31	63.8	76.3	72.9
P01034	P01034	10	10	10	Cystatin-C	CST3		1	10	10	10	7	6	5	5	5	5	5	6	5	7	6	5	5	5	5	5	6	5	7	6	5	5	5	5	5	6	5	72.6	72.6	72.6	15.799	146	146	0	141.26	52.1	42.5	36.3
P01037;P01036;P09228	P01037;P01036	4;2;1	4;2;1	4;2;1	Cystatin-SN;Cystatin-S	CST1;CST4	;	3	4	4	4	1	0	0	1	1	3	2	2	2	1	0	0	1	1	3	2	2	2	1	0	0	1	1	3	2	2	2	44.7	44.7	44.7	16.387	141	141;141;141	0	25.063	7.8	0	0
P01130;Q14114	P01130	17;1	17;1	17;1	Low-density lipoprotein receptor	LDLR		2	17	17	17	8	9	2	7	10	7	6	9	6	8	9	2	7	10	7	6	9	6	8	9	2	7	10	7	6	9	6	24.5	24.5	24.5	95.375	860	860;963	0	109.69	11.5	13	3.4
P01137;P61812	P01137	11;1	11;1	11;1	Transforming growth factor beta-1;Latency-associated peptide	TGFB1		2	11	11	11	6	4	3	4	4	6	2	5	7	6	4	3	4	4	6	2	5	7	6	4	3	4	4	6	2	5	7	33.1	33.1	33.1	44.341	390	390;414	0	92.074	18.5	11	8.2
P01344	P01344	8	8	8	Insulin-like growth factor II;Insulin-like growth factor II;Insulin-like growth factor II Ala-25 Del;Preptin	IGF2		1	8	8	8	4	7	8	6	8	7	5	8	7	4	7	8	6	8	7	5	8	7	4	7	8	6	8	7	5	8	7	35.6	35.6	35.6	20.14	180	180	0	101.79	22.2	30	35.6
P01584	P01584	5	5	5	Interleukin-1 beta	IL1B		1	5	5	5	0	3	1	0	3	4	0	5	3	0	3	1	0	3	4	0	5	3	0	3	1	0	3	4	0	5	3	16.7	16.7	16.7	30.748	269	269	0	23.55	0	16.7	4.5
P02452;CON__Q862S4	P02452	74;5	74;5	72;5	Collagen alpha-1(I) chain	COL1A1		2	74	74	72	64	34	31	48	31	26	57	28	30	64	34	31	48	31	26	57	28	30	62	34	31	46	31	26	55	28	30	52.7	52.7	52.7	138.94	1464	1464;114	0	323.31	47.9	22	18.5
P02458	P02458	3	1	1	Collagen alpha-1(II) chain;Collagen alpha-1(II) chain;Chondrocalcin	COL2A1		1	3	1	1	2	0	1	3	0	1	3	1	1	0	0	1	1	0	1	1	1	1	0	0	1	1	0	1	1	1	1	2.8	1.2	1.2	141.78	1487	1487	0.0022108	3.2766	1.5	0	1.2
P02461;CON__P04258	P02461	34;11	34;11	34;11	Collagen alpha-1(III) chain	COL3A1		2	34	34	34	34	6	7	18	8	7	17	10	8	34	6	7	18	8	7	17	10	8	34	6	7	18	8	7	17	10	8	26.7	26.7	26.7	138.56	1466	1466;1466	0	323.31	26.7	4.4	4.1
P02462;P29400	P02462;P29400	3;2	3;2	3;2	Collagen alpha-1(IV) chain;Arresten;Collagen alpha-5(IV) chain	COL4A1;COL4A5	;	2	3	3	3	3	0	0	2	0	0	2	0	0	3	0	0	2	0	0	2	0	0	3	0	0	2	0	0	2	0	0	2.3	2.3	2.3	160.61	1669	1669;1685	0	7.2594	2.3	0	0
P02545;REV__Q5VX52	P02545	66;1	66;1	64;1	Prelamin-A/C;Lamin-A/C	LMNA		2	66	66	64	42	36	30	22	33	31	45	40	29	42	36	30	22	33	31	45	40	29	42	35	29	22	33	31	44	40	29	75.8	75.8	75.8	74.139	664	664;437	0	323.31	59.3	54.7	41
P02649	P02649	3	2	2	Apolipoprotein E	APOE		1	3	2	2	1	0	0	0	1	1	1	0	2	0	0	0	0	0	0	0	0	2	0	0	0	0	0	0	0	0	2	8.5	5.7	5.7	36.154	317	317	0	6.7614	2.8	0	0
P02656	P02656	1	1	1	Apolipoprotein C-III	APOC3		1	1	1	1	0	0	0	0	0	0	0	1	0	0	0	0	0	0	0	0	1	0	0	0	0	0	0	0	0	1	0	16.2	16.2	16.2	10.852	99	99	0	16.005	0	0	0
P02751	P02751	144	144	144	Fibronectin;Anastellin;Ugl-Y1;Ugl-Y2;Ugl-Y3	FN1		1	144	144	144	110	80	73	94	90	82	90	93	94	110	80	73	94	90	82	90	93	94	110	80	73	94	90	82	90	93	94	57.3	57.3	57.3	262.62	2386	2386	0	323.31	48.9	35.5	34.4
P02753	P02753	2	2	2	Retinol-binding protein 4;Plasma retinol-binding protein(1-182);Plasma retinol-binding protein(1-181);Plasma retinol-binding protein(1-179);Plasma retinol-binding protein(1-176)	RBP4		1	2	2	2	0	1	1	2	1	1	1	1	1	0	1	1	2	1	1	1	1	1	0	1	1	2	1	1	1	1	1	10	10	10	23.01	201	201	0	5.5738	0	5	5
P02771	P02771	7	1	1	Alpha-fetoprotein	AFP		1	7	1	1	4	2	3	5	2	5	5	5	6	0	0	1	1	0	1	1	0	1	0	0	1	1	0	1	1	0	1	6.9	1.5	1.5	68.677	609	609	1	-2	4.3	1.8	3.3
P02786	P02786	20	20	20	Transferrin receptor protein 1;Transferrin receptor protein 1, serum form	TFRC		1	20	20	20	2	10	9	1	13	13	3	12	13	2	10	9	1	13	13	3	12	13	2	10	9	1	13	13	3	12	13	30.1	30.1	30.1	84.87	760	760	0	105.88	3.4	16.8	15.5
P02787	P02787	5	2	2	Serotransferrin	TF		1	5	2	2	0	2	2	4	1	3	3	3	3	0	0	0	2	0	2	1	1	1	0	0	0	2	0	2	1	1	1	6.2	3.2	3.2	77.063	698	698	0	4.8135	0	2.9	2.9
P02788	P02788	5	1	1	Lactotransferrin;Lactoferricin-H;Kaliocin-1;Lactoferroxin-A;Lactoferroxin-B;Lactoferroxin-C	LTF		1	5	1	1	2	1	1	3	3	3	3	4	4	0	0	0	1	1	1	1	1	1	0	0	0	1	1	1	1	1	1	5.5	1.3	1.3	78.181	710	710	0.0035336	2.7609	2.4	1.3	1.3
P02790	P02790	1	1	1	Hemopexin	HPX		1	1	1	1	0	0	0	1	0	0	0	1	0	0	0	0	1	0	0	0	1	0	0	0	0	1	0	0	0	1	0	2.8	2.8	2.8	51.676	462	462	0.00075131	3.5202	0	0	0
P02792	P02792	2	2	2	Ferritin light chain	FTL		1	2	2	2	1	1	0	1	0	0	0	0	0	1	1	0	1	0	0	0	0	0	1	1	0	1	0	0	0	0	0	17.7	17.7	17.7	20.019	175	175	0	5.9421	9.1	8.6	0
P02794	P02794	5	5	5	Ferritin heavy chain;Ferritin heavy chain, N-terminally processed	FTH1		1	5	5	5	1	0	0	1	2	2	3	2	1	1	0	0	1	2	2	3	2	1	1	0	0	1	2	2	3	2	1	24	24	24	21.225	183	183	0	6.5834	3.8	0	0
P03950	P03950	5	5	5	Angiogenin	ANG		1	5	5	5	4	0	0	2	0	1	1	0	0	4	0	0	2	0	1	1	0	0	4	0	0	2	0	1	1	0	0	40.1	40.1	40.1	16.55	147	147	0	22.575	40.1	0	0
P03952	P03952	2	2	2	Plasma kallikrein;Plasma kallikrein heavy chain;Plasma kallikrein light chain	KLKB1		1	2	2	2	1	1	1	2	0	2	1	0	1	1	1	1	2	0	2	1	0	1	1	1	1	2	0	2	1	0	1	3	3	3	71.369	638	638	0	4.0368	1.9	1.9	1.1
P03956	P03956	63	63	63	Interstitial collagenase;22 kDa interstitial collagenase;27 kDa interstitial collagenase	MMP1		1	63	63	63	51	52	55	44	52	51	38	54	51	51	52	55	44	52	51	38	54	51	51	52	55	44	52	51	38	54	51	72.1	72.1	72.1	54.006	469	469	0	323.31	65.7	66.5	71.2
P04062	P04062	5	5	5	Glucosylceramidase	GBA		1	5	5	5	2	1	2	3	2	3	2	3	3	2	1	2	3	2	3	2	3	3	2	1	2	3	2	3	2	3	3	9.1	9.1	9.1	59.716	536	536	0	11.028	3.5	1.5	4.3
P04066	P04066	2	2	2	Tissue alpha-L-fucosidase	FUCA1		1	2	2	2	1	0	0	0	0	0	1	0	0	1	0	0	0	0	0	1	0	0	1	0	0	0	0	0	1	0	0	5.2	5.2	5.2	53.688	466	466	0.00075415	3.566	3.6	0	0
P04075;P05062	P04075	36;1	36;1	31;0	Fructose-bisphosphate aldolase A	ALDOA		2	36	36	31	27	26	25	27	26	22	29	28	25	27	26	25	27	26	22	29	28	25	23	22	21	23	23	18	24	24	21	80.5	80.5	69	39.42	364	364;364	0	323.31	73.9	69	69
P04080	P04080	5	5	5	Cystatin-B	CSTB		1	5	5	5	3	4	3	3	4	3	4	4	3	3	4	3	3	4	3	4	4	3	3	4	3	3	4	3	4	4	3	55.1	55.1	55.1	11.139	98	98	0	62.174	42.9	55.1	45.9
P04083	P04083	22	22	22	Annexin A1	ANXA1		1	22	22	22	8	15	13	6	13	11	13	16	10	8	15	13	6	13	11	13	16	10	8	15	13	6	13	11	13	16	10	53.5	53.5	53.5	38.714	346	346	0	290.39	25.7	43.6	37.6
P04114	P04114	3	3	3	Apolipoprotein B-100;Apolipoprotein B-48	APOB		1	3	3	3	0	0	0	1	1	1	0	1	0	0	0	0	1	1	1	0	1	0	0	0	0	1	1	1	0	1	0	0.5	0.5	0.5	515.6	4563	4563	0.0035945	2.9068	0	0	0
P04156	P04156	2	2	2	Major prion protein	PRNP		1	2	2	2	1	1	2	1	1	1	1	1	1	1	1	2	1	1	1	1	1	1	1	1	2	1	1	1	1	1	1	8.7	8.7	8.7	27.661	253	253	0	74.437	4.7	4.7	8.7
P04179	P04179	2	2	2	Superoxide dismutase [Mn], mitochondrial	SOD2		1	2	2	2	1	0	0	2	0	0	1	0	0	1	0	0	2	0	0	1	0	0	1	0	0	2	0	0	1	0	0	7.7	7.7	7.7	24.722	222	222	0.0041551	2.5328	3.6	0	0
P04216	P04216	3	3	3	Thy-1 membrane glycoprotein	THY1		1	3	3	3	2	0	1	3	1	1	3	0	2	2	0	1	3	1	1	3	0	2	2	0	1	3	1	1	3	0	2	24.2	24.2	24.2	17.935	161	161	0	47.472	15.5	0	9.3
P04264;CON__P04264;CON__ENSEMBL:ENSBTAP00000038253	P04264;CON__P04264	11;10;3	11;10;3	7;6;1	Keratin, type II cytoskeletal 1	KRT1	;	3	11	11	7	4	2	2	3	3	3	4	4	2	4	2	2	3	3	3	4	4	2	2	2	2	3	2	2	3	3	2	17.9	17.9	12.6	66.038	644	644;644;606	0	34.883	6.7	2.8	3.3
P04406	P04406	21	21	21	Glyceraldehyde-3-phosphate dehydrogenase	GAPDH		1	21	21	21	17	12	11	11	11	11	12	14	12	17	12	11	11	11	11	12	14	12	17	12	11	11	11	11	12	14	12	67.8	67.8	67.8	36.053	335	335	0	243.29	62.7	39.1	34
P04632	P04632	3	3	3	Calpain small subunit 1	CAPNS1		1	3	3	3	2	3	3	1	1	2	3	1	2	2	3	3	1	1	2	3	1	2	2	3	3	1	1	2	3	1	2	11.9	11.9	11.9	28.315	268	268	0	8.8638	6.3	11.9	11.9
P04792	P04792	10	10	10	Heat shock protein beta-1	HSPB1		1	10	10	10	7	6	5	6	6	5	7	7	2	7	6	5	6	6	5	7	7	2	7	6	5	6	6	5	7	7	2	56.1	56.1	56.1	22.782	205	205	0	169.06	35.6	32.7	32.2
P05023;P13637;P50993;Q13733;P54707	P05023;P13637	4;2;1;1;1	4;2;1;1;1	4;2;1;1;1	Sodium/potassium-transporting ATPase subunit alpha-1;Sodium/potassium-transporting ATPase subunit alpha-3	ATP1A1;ATP1A3	;	5	4	4	4	0	1	2	0	3	1	0	1	2	0	1	2	0	3	1	0	1	2	0	1	2	0	3	1	0	1	2	2.8	2.8	2.8	112.89	1023	1023;1013;1020;1029;1039	0	11.731	0	0.9	2
P05067	P05067	28	28	26	Amyloid beta A4 protein;N-APP;Soluble APP-alpha;Soluble APP-beta;C99;Beta-amyloid protein 42;Beta-amyloid protein 40;C83;P3(42);P3(40);C80;Gamma-secretase C-terminal fragment 59;Gamma-secretase C-terminal fragment 57;Gamma-secretase C-terminal fragment 50;C31	APP		1	28	28	26	22	20	17	14	16	16	14	20	15	22	20	17	14	16	16	14	20	15	20	19	16	14	16	16	14	20	15	33.9	33.9	32.7	86.942	770	770	0	323.31	29	29	26.8
P05090	P05090	1	1	1	Apolipoprotein D	APOD		1	1	1	1	1	0	0	1	0	0	1	0	1	1	0	0	1	0	0	1	0	1	1	0	0	1	0	0	1	0	1	5.8	5.8	5.8	21.275	189	189	0.0041265	2.4567	5.8	0	0
P05120	P05120	29	29	29	Plasminogen activator inhibitor 2	SERPINB2		1	29	29	29	10	25	23	7	20	22	10	26	22	10	25	23	7	20	22	10	26	22	10	25	23	7	20	22	10	26	22	56.6	56.6	56.6	46.596	415	415	0	323.31	25.1	51.8	51.6
P05121	P05121	22	22	22	Plasminogen activator inhibitor 1	SERPINE1		1	22	22	22	20	18	18	15	16	15	16	15	15	20	18	18	15	16	15	16	15	15	20	18	18	15	16	15	16	15	15	49.8	49.8	49.8	45.059	402	402	0	323.31	45.5	41.5	45.5
P05155	P05155	14	14	12	Plasma protease C1 inhibitor	SERPING1		1	14	14	12	11	3	1	6	2	4	9	3	6	11	3	1	6	2	4	9	3	6	9	3	1	6	2	4	9	3	6	26.8	26.8	24	55.154	500	500	0	54.978	23.4	7.2	3.2
P05161	P05161	1	1	1	Ubiquitin-like protein ISG15	ISG15		1	1	1	1	0	0	0	0	0	0	1	0	0	0	0	0	0	0	0	1	0	0	0	0	0	0	0	0	1	0	0	5.5	5.5	5.5	17.887	165	165	0.0098619	2.1121	0	0	0
P05198	P05198	9	9	9	Eukaryotic translation initiation factor 2 subunit 1	EIF2S1		1	9	9	9	1	1	0	0	4	0	1	6	1	1	1	0	0	4	0	1	6	1	1	1	0	0	4	0	1	6	1	36.5	36.5	36.5	36.112	315	315	0	26.311	3.2	3.8	0
P05231	P05231	13	13	13	Interleukin-6	IL6		1	13	13	13	0	8	5	0	7	5	1	11	5	0	8	5	0	7	5	1	11	5	0	8	5	0	7	5	1	11	5	51.9	51.9	51.9	23.718	212	212	0	92.456	0	34.9	19.8
P05362	P05362	18	18	18	Intercellular adhesion molecule 1	ICAM1		1	18	18	18	3	15	14	3	15	16	3	15	13	3	15	14	3	15	16	3	15	13	3	15	14	3	15	16	3	15	13	29.5	29.5	29.5	57.825	532	532	0	237.26	6	28	25.9
P05386	P05386	1	1	1	60S acidic ribosomal protein P1	RPLP1		1	1	1	1	0	0	0	0	0	0	0	1	0	0	0	0	0	0	0	0	1	0	0	0	0	0	0	0	0	1	0	37.7	37.7	37.7	11.514	114	114	0	4.7916	0	0	0
P05387	P05387	5	5	5	60S acidic ribosomal protein P2	RPLP2		1	5	5	5	3	4	2	4	2	2	4	4	4	3	4	2	4	2	2	4	4	4	3	4	2	4	2	2	4	4	4	64.3	64.3	64.3	11.665	115	115	0	83.569	25.2	57.4	25.2
P05388;Q8NHW5	P05388;Q8NHW5	7;5	7;5	7;5	60S acidic ribosomal protein P0;60S acidic ribosomal protein P0-like	RPLP0;RPLP0P6	;	2	7	7	7	4	2	2	3	4	2	3	4	3	4	2	2	3	4	2	3	4	3	4	2	2	3	4	2	3	4	3	29	29	29	34.273	317	317;317	0	72.328	19.2	6.6	6.6
P05452	P05452	8	8	4	Tetranectin	CLEC3B		1	8	8	4	5	0	0	5	2	2	5	2	2	5	0	0	5	2	2	5	2	2	2	0	0	3	0	0	3	0	0	55.9	55.9	32.7	22.537	202	202	0	76.278	36.1	0	0
P05455	P05455	5	5	5	Lupus La protein	SSB		1	5	5	5	1	2	0	0	2	1	2	2	1	1	2	0	0	2	1	2	2	1	1	2	0	0	2	1	2	2	1	15.7	15.7	15.7	46.836	408	408	0	13.306	3.9	7.6	0
P05556	P05556	16	16	16	Integrin beta-1	ITGB1		1	16	16	16	8	7	4	7	8	8	5	9	10	8	7	4	7	8	8	5	9	10	8	7	4	7	8	8	5	9	10	16	16	16	88.414	798	798	0	160.53	10.5	9.1	6.5
P05997	P05997	20	20	20	Collagen alpha-2(V) chain	COL5A2		1	20	20	20	13	3	1	6	3	1	9	1	3	13	3	1	6	3	1	9	1	3	13	3	1	6	3	1	9	1	3	16.9	16.9	16.9	144.91	1499	1499	0	156.36	11.3	2.7	0.7
P06280	P06280	8	8	8	Alpha-galactosidase A	GLA		1	8	8	8	6	5	5	3	6	6	4	8	6	6	5	5	3	6	6	4	8	6	6	5	5	3	6	6	4	8	6	19.8	19.8	19.8	48.766	429	429	0	66.696	14.5	13.8	15.2
P06396	P06396	26	26	7	Gelsolin	GSN		1	26	26	7	20	8	5	12	8	8	12	15	10	20	8	5	12	8	8	12	15	10	6	4	1	4	2	2	4	3	1	33.1	33.1	14.8	85.696	782	782	0	163.25	26.2	13.8	8.3
P06703	P06703	10	10	10	Protein S100-A6	S100A6		1	10	10	10	6	6	7	8	6	5	5	5	6	6	6	7	8	6	5	5	5	6	6	6	7	8	6	5	5	5	6	42.2	42.2	42.2	10.18	90	90	0	135.34	35.6	42.2	32.2
P06730	P06730	3	3	3	Eukaryotic translation initiation factor 4E	EIF4E		1	3	3	3	0	1	1	1	2	1	2	2	2	0	1	1	1	2	1	2	2	2	0	1	1	1	2	1	2	2	2	11.5	11.5	11.5	25.097	217	217	0	12.515	0	3.2	3.2
P06733	P06733	28	28	26	Alpha-enolase	ENO1		1	28	28	26	20	21	19	18	16	20	18	21	20	20	21	19	18	16	20	18	21	20	19	19	18	17	15	19	17	19	19	64.5	64.5	61.1	47.168	434	434	0	323.31	50.5	51.4	48.4
P06737	P06737	4	1	1	Glycogen phosphorylase, liver form	PYGL		1	4	1	1	0	2	1	0	2	2	1	1	1	0	0	0	0	0	0	1	0	0	0	0	0	0	0	0	1	0	0	4.7	1.4	1.4	97.147	847	847	0.0035411	2.7757	0	2.4	0.9
P06744;CON__Q3ZBD7	P06744	18;3	18;3	18;3	Glucose-6-phosphate isomerase	GPI		2	18	18	18	10	8	4	4	4	5	10	8	6	10	8	4	4	4	5	10	8	6	10	8	4	4	4	5	10	8	6	41.6	41.6	41.6	63.146	558	558;557	0	227.35	24.2	21.1	7.7
P06748	P06748	8	8	8	Nucleophosmin	NPM1		1	8	8	8	1	5	3	1	5	4	3	5	4	1	5	3	1	5	4	3	5	4	1	5	3	1	5	4	3	5	4	25.2	25.2	25.2	32.575	294	294	0	87.384	2.4	16	8.8
P06753	P06753	22	9	7	Tropomyosin alpha-3 chain	TPM3		1	22	9	7	18	13	9	11	8	8	14	10	9	8	5	3	4	2	2	5	2	2	7	5	3	2	2	2	4	2	2	45.6	24.6	20.4	32.95	285	285	0	69.369	42.8	36.1	26.7
P06756	P06756	3	3	3	Integrin alpha-V;Integrin alpha-V heavy chain;Integrin alpha-V light chain	ITGAV		1	3	3	3	1	0	1	1	0	3	0	1	3	1	0	1	1	0	3	0	1	3	1	0	1	1	0	3	0	1	3	3.3	3.3	3.3	116.04	1048	1048	0	8.3178	1	0	1.4
P06865	P06865	6	6	6	Beta-hexosaminidase subunit alpha	HEXA		1	6	6	6	3	2	2	1	3	3	3	2	3	3	2	2	1	3	3	3	2	3	3	2	2	1	3	3	3	2	3	13.8	13.8	13.8	60.702	529	529	0	15.452	5.5	3.6	3.6
P07093	P07093	29	29	29	Glia-derived nexin	SERPINE2		1	29	29	29	28	10	9	20	11	11	23	14	10	28	10	9	20	11	11	23	14	10	28	10	9	20	11	11	23	14	10	54.8	54.8	54.8	44.002	398	398	0	262.47	54	27.9	21.4
P07108	P07108	4	4	4	Acyl-CoA-binding protein	DBI		1	4	4	4	4	3	2	1	3	1	3	3	3	4	3	2	1	3	1	3	3	3	4	3	2	1	3	1	3	3	3	42.5	42.5	42.5	10.044	87	87	0	16.076	42.5	24.1	23
P07195	P07195	16	14	14	L-lactate dehydrogenase B chain	LDHB		1	16	14	14	11	11	8	9	10	5	10	9	7	10	10	7	7	9	5	8	8	6	10	10	7	7	9	5	8	8	6	40.4	36.5	36.5	36.638	334	334	0	95.059	30.8	29	21.6
P07204	P07204	2	2	2	Thrombomodulin	THBD		1	2	2	2	0	0	0	0	1	1	0	2	1	0	0	0	0	1	1	0	2	1	0	0	0	0	1	1	0	2	1	6.1	6.1	6.1	60.329	575	575	0	29.944	0	0	0
P07225	P07225	7	7	6	Vitamin K-dependent protein S	PROS1		1	7	7	6	3	1	1	2	3	1	0	1	2	3	1	1	2	3	1	0	1	2	3	1	1	2	2	1	0	1	2	11.7	11.7	10.5	75.122	676	676	0	17.788	4.6	1.2	1.2
P07237	P07237	45	45	45	Protein disulfide-isomerase	P4HB		1	45	45	45	26	24	17	22	25	21	24	32	28	26	24	17	22	25	21	24	32	28	26	24	17	22	25	21	24	32	28	63.8	63.8	63.8	57.116	508	508	0	323.31	48.8	44.7	32.1
P07339	P07339	12	12	12	Cathepsin D;Cathepsin D light chain;Cathepsin D heavy chain	CTSD		1	12	12	12	7	5	5	6	5	6	5	4	7	7	5	5	6	5	6	5	4	7	7	5	5	6	5	6	5	4	7	30.3	30.3	30.3	44.552	412	412	0	51.864	21.4	14.3	14.3
P07355;A6NMY6	P07355;A6NMY6	25;18	25;18	25;18	Annexin A2;Putative annexin A2-like protein	ANXA2;ANXA2P2	;	2	25	25	25	17	13	15	10	17	15	17	16	13	17	13	15	10	17	15	17	16	13	17	13	15	10	17	15	17	16	13	59.3	59.3	59.3	38.604	339	339;339	0	323.31	43.7	32.4	46.3
P07384	P07384	8	8	8	Calpain-1 catalytic subunit	CAPN1		1	8	8	8	1	1	1	1	2	3	2	5	3	1	1	1	1	2	3	2	5	3	1	1	1	1	2	3	2	5	3	11.1	11.1	11.1	81.889	714	714	0	17.52	1.4	1.4	1.4
P07437	P07437	18	18	4	Tubulin beta chain	TUBB		1	18	18	4	11	11	10	4	10	8	7	13	6	11	11	10	4	10	8	7	13	6	1	4	4	1	3	3	2	4	2	41.4	41.4	13.1	49.67	444	444	0	226.63	26.1	27	27.5
P07585	P07585	34	34	33	Decorin	DCN		1	34	34	33	29	18	11	26	13	13	27	19	11	29	18	11	26	13	13	27	19	11	29	17	10	25	12	12	26	18	10	56	56	56	39.746	359	359	0	323.31	54.6	38.4	30.6
P07602	P07602	19	19	19	Prosaposin;Saposin-A;Saposin-B-Val;Saposin-B;Saposin-C;Saposin-D	PSAP		1	19	19	19	11	6	8	12	11	8	13	6	9	11	6	8	12	11	8	13	6	9	11	6	8	12	11	8	13	6	9	32.4	32.4	32.4	58.112	524	524	0	107.09	15.1	13	13.7
P07686	P07686	20	20	20	Beta-hexosaminidase subunit beta;Beta-hexosaminidase subunit beta chain B;Beta-hexosaminidase subunit beta chain A	HEXB		1	20	20	20	11	8	9	11	13	10	13	9	11	11	8	9	11	13	10	13	9	11	11	8	9	11	13	10	13	9	11	29.5	29.5	29.5	63.111	556	556	0	94.729	19.6	16.4	14.4
P07711;Q5NE16	P07711	16;3	16;3	15;2	Cathepsin L1;Cathepsin L1 heavy chain;Cathepsin L1 light chain	CTSL		2	16	16	15	11	12	11	4	12	6	3	14	13	11	12	11	4	12	6	3	14	13	11	11	10	4	11	5	3	13	12	38.1	38.1	38.1	37.564	333	333;218	0	209.21	36	37.2	36.3
P07737;CON__P02584	P07737	13;3	13;3	13;3	Profilin-1	PFN1		2	13	13	13	11	10	10	8	6	9	11	10	9	11	10	10	8	6	9	11	10	9	11	10	10	8	6	9	11	10	9	77.9	77.9	77.9	15.054	140	140;140	0	225.76	65.7	67.1	67.1
P07814	P07814	9	9	9	Bifunctional glutamate/proline--tRNA ligase;Glutamate--tRNA ligase;Proline--tRNA ligase	EPRS		1	9	9	9	1	4	3	2	2	4	6	5	4	1	4	3	2	2	4	6	5	4	1	4	3	2	2	4	6	5	4	6.9	6.9	6.9	170.59	1512	1512	0	16.512	0.5	2	1.4
P07858	P07858	25	25	25	Cathepsin B;Cathepsin B light chain;Cathepsin B heavy chain	CTSB		1	25	25	25	20	18	16	16	22	17	16	20	21	20	18	16	16	22	17	16	20	21	20	18	16	16	22	17	16	20	21	49.6	49.6	49.6	37.821	339	339	0	323.31	48.7	49.3	43.1
P07900;Q58FG0;Q14568;Q58FG1	P07900	35;7;5;2	23;4;1;1	23;4;1;1	Heat shock protein HSP 90-alpha	HSP90AA1		4	35	23	23	12	21	18	9	25	16	21	25	20	7	14	12	5	15	10	15	16	12	7	14	12	5	15	10	15	16	12	35.2	21.9	21.9	84.659	732	732;334;343;418	0	163.87	16.4	25.5	22.8
P07910;P0DMR1;O60812;B7ZW38;B2RXH8;Q86SE5	P07910;P0DMR1;O60812;B7ZW38;B2RXH8	4;3;3;3;3;1	4;3;3;3;3;1	4;3;3;3;3;1	Heterogeneous nuclear ribonucleoproteins C1/C2;Heterogeneous nuclear ribonucleoprotein C-like 4;Heterogeneous nuclear ribonucleoprotein C-like 1;Heterogeneous nuclear ribonucleoprotein C-like 3;Heterogeneous nuclear ribonucleoprotein C-like 2	HNRNPC;HNRNPCL4;HNRNPCL1;HNRNPCL3;HNRNPCL2	;;;;	6	4	4	4	3	2	1	0	1	1	3	2	1	3	2	1	0	1	1	3	2	1	3	2	1	0	1	1	3	2	1	9.8	9.8	9.8	33.67	306	306;293;293;293;293;291	0	9.772	6.9	4.2	3.9
P07942	P07942	93	93	92	Laminin subunit beta-1	LAMB1		1	93	93	92	79	39	35	61	40	39	61	43	44	79	39	35	61	40	39	61	43	44	78	38	35	61	39	39	60	42	43	43.8	43.8	43.2	198.04	1786	1786	0	323.31	40.4	21.7	19.3
P07951	P07951	20	5	1	Tropomyosin beta chain	TPM2		1	20	5	1	15	7	6	10	6	7	15	8	5	3	1	0	2	0	0	4	0	0	0	0	0	1	0	0	1	0	0	45.8	23.9	3.9	32.85	284	284	0	27.292	34.9	17.6	18.7
P07954	P07954	4	4	4	Fumarate hydratase, mitochondrial	FH		1	4	4	4	1	0	0	0	0	0	3	1	0	1	0	0	0	0	0	3	1	0	1	0	0	0	0	0	3	1	0	9.6	9.6	9.6	54.636	510	510	0	5.3447	1.6	0	0
P07996	P07996	64	64	20	Thrombospondin-1	THBS1		1	64	64	20	58	22	17	43	19	19	50	19	19	58	22	17	43	19	19	50	19	19	17	6	3	13	5	5	15	6	5	50.1	50.1	18	129.38	1170	1170	0	323.31	45.1	19.1	14.3
P08123	P08123	119	119	119	Collagen alpha-2(I) chain	COL1A2		1	119	119	119	109	35	30	79	38	29	93	35	33	109	35	30	79	38	29	93	35	33	109	35	30	79	38	29	93	35	33	84.4	84.4	84.4	129.31	1366	1366	0	323.31	82.8	27	22.9
P08133	P08133	15	15	15	Annexin A6	ANXA6		1	15	15	15	6	2	1	4	3	3	7	6	2	6	2	1	4	3	3	7	6	2	6	2	1	4	3	3	7	6	2	23.5	23.5	23.5	75.872	673	673	0	37.401	10.1	2.8	1.5
P08134	P08134	4	4	1	Rho-related GTP-binding protein RhoC	RHOC		1	4	4	1	2	2	1	3	1	1	2	1	1	2	2	1	3	1	1	2	1	1	0	1	0	0	0	0	0	0	0	24.9	24.9	6.2	22.006	193	193	0	9.6488	10.9	14	7.8
P08174	P08174	1	1	1	Complement decay-accelerating factor	CD55		1	1	1	1	0	1	1	1	1	1	1	1	1	0	1	1	1	1	1	1	1	1	0	1	1	1	1	1	1	1	1	2.1	2.1	2.1	41.4	381	381	0.00075586	3.5993	0	2.1	2.1
P08195	P08195	8	8	8	4F2 cell-surface antigen heavy chain	SLC3A2		1	8	8	8	6	2	2	6	8	4	6	7	5	6	2	2	6	8	4	6	7	5	6	2	2	6	8	4	6	7	5	14.9	14.9	14.9	67.993	630	630	0	41.561	11.1	2.9	2.9
P08238;Q58FF7	P08238	36;14	36;14	18;4	Heat shock protein HSP 90-beta	HSP90AB1		2	36	36	18	16	21	20	9	26	20	18	27	24	16	21	20	9	26	20	18	27	24	8	12	10	4	13	10	10	13	13	39.9	39.9	21.5	83.263	724	724;597	0	289.84	26	27.8	25.8
P08253	P08253	52	52	52	72 kDa type IV collagenase;PEX	MMP2		1	52	52	52	45	33	36	36	33	32	35	38	37	45	33	36	36	33	32	35	38	37	45	33	36	36	33	32	35	38	37	57.4	57.4	57.4	73.881	660	660	0	323.31	53.9	49.5	51.1
P08254	P08254	38	38	34	Stromelysin-1	MMP3		1	38	38	34	18	31	27	17	23	27	12	32	27	18	31	27	17	23	27	12	32	27	14	27	23	13	19	24	9	28	23	46.1	46.1	42.3	53.977	477	477	0	222.5	32.7	43.8	40.9
P08294	P08294	14	14	14	Extracellular superoxide dismutase [Cu-Zn]	SOD3		1	14	14	14	12	1	2	7	2	4	7	4	2	12	1	2	7	2	4	7	4	2	12	1	2	7	2	4	7	4	2	61.2	61.2	61.2	25.851	240	240	0	154.07	61.2	3.3	10
P08476	P08476	37	37	37	Inhibin beta A chain	INHBA		1	37	37	37	3	30	25	2	26	24	1	31	27	3	30	25	2	26	24	1	31	27	3	30	25	2	26	24	1	31	27	55.9	55.9	55.9	47.442	426	426	0	323.31	4.2	52.6	47.9
P08572	P08572	9	9	9	Collagen alpha-2(IV) chain;Canstatin	COL4A2		1	9	9	9	8	0	1	5	1	1	5	2	2	8	0	1	5	1	1	5	2	2	8	0	1	5	1	1	5	2	2	6.8	6.8	6.8	167.55	1712	1712	0	26.366	6	0	0.6
P08581	P08581	8	8	8	Hepatocyte growth factor receptor	MET		1	8	8	8	2	1	1	4	4	5	4	3	7	2	1	1	4	4	5	4	3	7	2	1	1	4	4	5	4	3	7	6.3	6.3	6.3	155.54	1390	1390	0	30.4	2.3	0.6	0.6
P08603;Q03591;Q02985	P08603	52;4;1	52;4;1	52;4;1	Complement factor H	CFH		3	52	52	52	36	17	15	29	20	24	35	19	23	36	17	15	29	20	24	35	19	23	36	17	15	29	20	24	35	19	23	51.6	51.6	51.6	139.09	1231	1231;330;330	0	323.31	35	16.4	14.5
P08648	P08648	8	8	8	Integrin alpha-5;Integrin alpha-5 heavy chain;Integrin alpha-5 light chain	ITGA5		1	8	8	8	3	1	3	1	4	5	1	3	3	3	1	3	1	4	5	1	3	3	3	1	3	1	4	5	1	3	3	10.3	10.3	10.3	114.54	1049	1049	0	42.402	4.6	0.7	5
P08670;P17661;P41219;CON__H-INV:HIT000292931;CON__Q61726;CON__Q6NT21;CON__P78385;CON__P78386;CON__Q8N1N4-2;CON__Q7RTT2;P14136;P78385;Q16352;P78386;Q8N1N4;P07197;P07196;P12036	P08670	70;6;5;2;2;2;2;2;2;2;2;2;2;2;2;2;1;1	70;6;5;2;2;2;2;2;2;2;2;2;2;2;2;2;1;1	66;4;3;0;0;0;0;0;0;0;0;0;2;0;0;2;1;1	Vimentin	VIM		18	70	70	66	56	59	51	45	47	48	49	50	52	56	59	51	45	47	48	49	50	52	53	55	48	41	45	45	46	48	50	87.8	87.8	84.5	53.651	466	466;470;470;443;479;493;493;507;521;521;432;493;499;507;520;916;543;1026	0	323.31	82.6	86.3	80.7
P08708	P08708	2	2	2	40S ribosomal protein S17	RPS17		1	2	2	2	0	0	1	0	0	0	0	1	0	0	0	1	0	0	0	0	1	0	0	0	1	0	0	0	0	1	0	17	17	17	15.55	135	135	0.002185	3.0588	0	0	9.6
P08758	P08758	8	8	8	Annexin A5	ANXA5		1	8	8	8	3	5	2	2	6	5	5	7	4	3	5	2	2	6	5	5	7	4	3	5	2	2	6	5	5	7	4	20	20	20	35.936	320	320	0	17.482	8.4	13.4	5
P08865	P08865	9	9	9	40S ribosomal protein SA	RPSA		1	9	9	9	3	6	4	3	6	4	4	6	4	3	6	4	3	6	4	4	6	4	3	6	4	3	6	4	4	6	4	43.4	43.4	43.4	32.854	295	295	0	162.25	14.6	30.5	20
P09012	P09012	1	1	1	U1 small nuclear ribonucleoprotein A	SNRPA		1	1	1	1	0	1	0	0	0	0	0	0	0	0	1	0	0	0	0	0	0	0	0	1	0	0	0	0	0	0	0	3.5	3.5	3.5	31.279	282	282	0.0053945	2.3016	0	3.5	0
P09104	P09104	7	5	4	Gamma-enolase	ENO2		1	7	5	4	1	4	3	1	2	2	2	6	1	0	2	2	0	1	1	1	4	0	0	1	1	0	1	0	1	4	0	18	10.4	8.5	47.268	434	434	0	9.7788	4.1	12.9	9.4
P09211	P09211	9	9	9	Glutathione S-transferase P	GSTP1		1	9	9	9	7	8	7	7	7	7	7	8	7	7	8	7	7	7	7	7	8	7	7	8	7	7	7	7	7	8	7	58.6	58.6	58.6	23.356	210	210	0	160.97	41.4	46.2	41.4
P09237	P09237	1	1	1	Matrilysin	MMP7		1	1	1	1	0	0	0	0	0	0	1	0	0	0	0	0	0	0	0	1	0	0	0	0	0	0	0	0	1	0	0	3.7	3.7	3.7	29.676	267	267	0.0047522	2.3611	0	0	0
P09238;P22894	P09238	24;1	20;1	20;1	Stromelysin-2	MMP10		2	24	20	20	4	16	13	4	16	14	3	23	18	0	12	9	0	12	11	0	19	14	0	12	9	0	12	11	0	19	14	38.4	32.1	32.1	54.151	476	476;467	0	206.76	6.3	28.4	21.6
P09341	P09341	5	5	4	Growth-regulated alpha protein;GRO-alpha(4-73);GRO-alpha(5-73);GRO-alpha(6-73)	CXCL1		1	5	5	4	3	5	2	2	5	3	3	4	3	3	5	2	2	5	3	3	4	3	2	4	1	2	4	2	2	3	2	45.8	45.8	30.8	11.301	107	107	0	114.16	26.2	45.8	26.2
P09382	P09382	17	17	17	Galectin-1	LGALS1		1	17	17	17	11	12	9	9	13	12	11	13	11	11	12	9	9	13	12	11	13	11	11	12	9	9	13	12	11	13	11	76.3	76.3	76.3	14.716	135	135	0	323.31	74.8	68.9	60
P09417	P09417	2	2	2	Dihydropteridine reductase	QDPR		1	2	2	2	0	0	0	0	0	0	0	2	0	0	0	0	0	0	0	0	2	0	0	0	0	0	0	0	0	2	0	9.8	9.8	9.8	25.789	244	244	0	6.6499	0	0	0
P09429;B2RPK0;P23497	P09429;B2RPK0	4;2;1	4;2;1	4;2;1	High mobility group protein B1;Putative high mobility group protein B1-like 1	HMGB1;HMGB1P1	;	3	4	4	4	3	3	3	3	3	2	3	2	3	3	3	3	3	3	2	3	2	3	3	3	3	3	3	2	3	2	3	24.7	24.7	24.7	24.893	215	215;211;879	0	20.807	18.1	18.1	18.1
P09486	P09486	21	21	21	SPARC	SPARC		1	21	21	21	20	9	11	17	11	11	14	12	9	20	9	11	17	11	11	14	12	9	20	9	11	17	11	11	14	12	9	51.2	51.2	51.2	34.632	303	303	0	323.31	45.9	28.4	32.3
P09493	P09493	21	10	7	Tropomyosin alpha-1 chain	TPM1		1	21	10	7	17	5	5	12	4	5	13	6	4	8	0	1	5	0	0	6	1	0	6	0	0	3	0	0	4	0	0	47.5	27.8	22.5	32.708	284	284	0	71.069	43	12.7	14.8
P09496	P09496	5	5	5	Clathrin light chain A	CLTA		1	5	5	5	3	3	3	3	1	4	4	3	4	3	3	3	3	1	4	4	3	4	3	3	3	3	1	4	4	3	4	13.7	13.7	13.7	27.076	248	248	0	47.857	10.9	10.1	10.9
P09497	P09497	2	2	2	Clathrin light chain B	CLTB		1	2	2	2	1	0	0	0	0	0	1	1	0	1	0	0	0	0	0	1	1	0	1	0	0	0	0	0	1	1	0	7.9	7.9	7.9	25.19	229	229	0	3.9826	3.5	0	0
P09603	P09603	7	7	7	Macrophage colony-stimulating factor 1;Processed macrophage colony-stimulating factor 1	CSF1		1	7	7	7	6	1	1	4	1	1	4	1	0	6	1	1	4	1	1	4	1	0	6	1	1	4	1	1	4	1	0	11	11	11	60.179	554	554	0	22.61	8.1	1.3	1.3
P09619	P09619	9	9	9	Platelet-derived growth factor receptor beta	PDGFRB		1	9	9	9	6	3	4	6	5	5	6	5	4	6	3	4	6	5	5	6	5	4	6	3	4	6	5	5	6	5	4	9.8	9.8	9.8	123.97	1106	1106	0	38.909	6.1	3.2	4.4
P09651;Q32P51	P09651;Q32P51	10;6	10;6	10;6	Heterogeneous nuclear ribonucleoprotein A1;Heterogeneous nuclear ribonucleoprotein A1, N-terminally processed;Heterogeneous nuclear ribonucleoprotein A1-like 2	HNRNPA1;HNRNPA1L2	;	2	10	10	10	7	7	4	3	5	4	5	5	1	7	7	4	3	5	4	5	5	1	7	7	4	3	5	4	5	5	1	28	28	28	38.746	372	372;320	0	62.738	18.8	19.1	12.1
P09871	P09871	25	25	24	Complement C1s subcomponent;Complement C1s subcomponent heavy chain;Complement C1s subcomponent light chain	C1S		1	25	25	24	21	2	0	14	5	5	14	4	6	21	2	0	14	5	5	14	4	6	20	2	0	14	5	5	14	4	6	32.1	32.1	31	76.684	688	688	0	176.35	26.9	3.6	0
P09919	P09919	1	1	1	Granulocyte colony-stimulating factor	CSF3		1	1	1	1	0	1	0	0	0	0	0	0	0	0	1	0	0	0	0	0	0	0	0	1	0	0	0	0	0	0	0	5.3	5.3	5.3	22.293	207	207	0.0035436	2.7776	0	5.3	0
P09936	P09936	15	15	15	Ubiquitin carboxyl-terminal hydrolase isozyme L1	UCHL1		1	15	15	15	7	8	6	6	9	10	8	9	9	7	8	6	6	9	10	8	9	9	7	8	6	6	9	10	8	9	9	61.9	61.9	61.9	24.824	223	223	0	323.31	36.8	31.8	34.1
P09960	P09960	8	8	8	Leukotriene A-4 hydrolase	LTA4H		1	8	8	8	1	2	0	2	0	1	3	6	0	1	2	0	2	0	1	3	6	0	1	2	0	2	0	1	3	6	0	17.7	17.7	17.7	69.284	611	611	0	27.949	1.6	3.9	0
P09972	P09972	6	1	1	Fructose-bisphosphate aldolase C	ALDOC		1	6	1	1	5	5	5	5	4	5	6	5	5	1	1	1	1	1	1	1	1	1	1	1	1	1	1	1	1	1	1	20.6	6.3	6.3	39.455	364	364	0	39.651	17.9	20.6	20.6
P0C7X5	P0C7X5	1	1	1	Zinc finger protein 806	ZNF806		1	1	1	1	0	1	0	0	0	0	0	0	0	0	1	0	0	0	0	0	0	0	0	1	0	0	0	0	0	0	0	2.5	2.5	2.5	67.807	589	589	1	-2	0	2.5	0
P0DMV9;P0DMV8	P0DMV9;P0DMV8	26;26	20;20	11;11	Heat shock 70 kDa protein 1B;Heat shock 70 kDa protein 1A	HSPA1B;HSPA1A	;	2	26	20	11	15	11	10	8	14	10	11	15	12	12	9	6	5	12	8	10	12	8	8	3	3	2	6	5	5	5	3	40.6	32.8	20.9	70.051	641	641;641	0	89.028	26.2	20.4	13.7
P10124	P10124	7	7	7	Serglycin	SRGN		1	7	7	7	6	5	4	4	3	3	4	3	5	6	5	4	4	3	3	4	3	5	6	5	4	4	3	3	4	3	5	48.7	48.7	48.7	17.652	158	158	0	24.758	43.7	31.6	26.6
P10145;Q96QU8	P10145	12;1	12;1	12;1	Interleukin-8;MDNCF-a;Interleukin-8;IL-8(5-77);IL-8(6-77);IL-8(7-77);IL-8(8-77);IL-8(9-77)	CXCL8		2	12	12	12	4	9	7	3	9	6	4	11	6	4	9	7	3	9	6	4	11	6	4	9	7	3	9	6	4	11	6	69.7	69.7	69.7	11.098	99	99;1125	0	252.96	43.4	65.7	57.6
P10147;P16619	P10147;P16619	1;1	1;1	1;1	C-C motif chemokine 3;MIP-1-alpha(4-69);C-C motif chemokine 3-like 1;LD78-beta(3-70);LD78-beta(5-70)	CCL3;CCL3L1	;	2	1	1	1	0	1	0	0	1	1	0	1	1	0	1	0	0	1	1	0	1	1	0	1	0	0	1	1	0	1	1	14.1	14.1	14.1	10.085	92	92;93	0	4.4868	0	14.1	0
P10155	P10155	2	2	2	60 kDa SS-A/Ro ribonucleoprotein	TROVE2		1	2	2	2	0	0	0	0	0	1	0	1	1	0	0	0	0	0	1	0	1	1	0	0	0	0	0	1	0	1	1	5.4	5.4	5.4	60.67	538	538	0	5.6246	0	0	0
P10253	P10253	1	1	1	Lysosomal alpha-glucosidase;76 kDa lysosomal alpha-glucosidase;70 kDa lysosomal alpha-glucosidase	GAA		1	1	1	1	1	0	0	0	0	0	1	0	0	1	0	0	0	0	0	1	0	0	1	0	0	0	0	0	1	0	0	1.3	1.3	1.3	105.32	952	952	0.0041609	2.5389	1.3	0	0
P10321	P10321	16	16	1	HLA class I histocompatibility antigen, Cw-7 alpha chain	HLA-C		1	16	16	1	11	10	9	10	12	11	10	10	13	11	10	9	10	12	11	10	10	13	1	1	0	0	1	1	0	1	1	50.3	50.3	5.7	40.648	366	366	0	254.11	43.4	41.5	36.3
P10451;CON__P31096	P10451	4;1	4;1	4;1	Osteopontin	SPP1		2	4	4	4	0	2	3	0	3	4	0	3	3	0	2	3	0	3	4	0	3	3	0	2	3	0	3	4	0	3	3	15.3	15.3	15.3	35.422	314	314;262	0	77.046	0	10.5	14.6
P10599	P10599	8	8	8	Thioredoxin	TXN		1	8	8	8	7	5	6	6	6	5	7	7	6	7	5	6	6	6	5	7	7	6	7	5	6	6	6	5	7	7	6	42.9	42.9	42.9	11.737	105	105	0	49.491	42.9	42.9	42.9
P10619	P10619	7	7	7	Lysosomal protective protein;Lysosomal protective protein 32 kDa chain;Lysosomal protective protein 20 kDa chain	CTSA		1	7	7	7	6	2	1	3	2	3	4	4	3	6	2	1	3	2	3	4	4	3	6	2	1	3	2	3	4	4	3	17.5	17.5	17.5	54.465	480	480	0	52.493	15.2	5.4	2.7
P10644	P10644	6	6	6	cAMP-dependent protein kinase type I-alpha regulatory subunit;cAMP-dependent protein kinase type I-alpha regulatory subunit, N-terminally processed	PRKAR1A		1	6	6	6	3	2	4	3	5	2	3	5	5	3	2	4	3	5	2	3	5	5	3	2	4	3	5	2	3	5	5	15.7	15.7	15.7	42.981	381	381	0	32.563	8.1	5	11
P10646	P10646	13	13	13	Tissue factor pathway inhibitor	TFPI		1	13	13	13	7	5	5	5	7	6	5	4	7	7	5	5	5	7	6	5	4	7	7	5	5	5	7	6	5	4	7	41.4	41.4	41.4	35.015	304	304	0	120.37	30.3	18.1	19.1
P10768	P10768	2	2	2	S-formylglutathione hydrolase	ESD		1	2	2	2	0	1	0	1	0	0	0	1	2	0	1	0	1	0	0	0	1	2	0	1	0	1	0	0	0	1	2	7.4	7.4	7.4	31.462	282	282	0	5.3075	0	3.2	0
P10809	P10809	1	1	1	60 kDa heat shock protein, mitochondrial	HSPD1		1	1	1	1	0	0	0	0	0	0	1	0	0	0	0	0	0	0	0	1	0	0	0	0	0	0	0	0	1	0	0	1.4	1.4	1.4	61.054	573	573	0.002907	3.0228	0	0	0
P10909	P10909	14	14	14	Clusterin;Clusterin beta chain;Clusterin alpha chain	CLU		1	14	14	14	14	0	0	10	2	0	12	5	2	14	0	0	10	2	0	12	5	2	14	0	0	10	2	0	12	5	2	29.6	29.6	29.6	52.494	449	449	0	81.985	29.6	0	0
P10915	P10915	7	7	7	Hyaluronan and proteoglycan link protein 1	HAPLN1		1	7	7	7	4	0	0	3	0	0	5	0	0	4	0	0	3	0	0	5	0	0	4	0	0	3	0	0	5	0	0	15.8	15.8	15.8	40.165	354	354	0	15.42	12.7	0	0
P11021	P11021	43	43	41	78 kDa glucose-regulated protein	HSPA5		1	43	43	41	38	23	24	20	25	19	30	31	22	38	23	24	20	25	19	30	31	22	36	22	22	18	24	18	29	30	21	57.2	57.2	57.2	72.332	654	654	0	323.31	54.9	37.3	40.8
P11047	P11047	101	101	98	Laminin subunit gamma-1	LAMC1		1	101	101	98	78	46	43	66	51	49	71	53	55	78	46	43	66	51	49	71	53	55	75	44	41	63	49	47	69	51	53	51.6	51.6	50.7	177.6	1609	1609	0	323.31	44.6	29.7	29.1
P11142;P54652	P11142	41;17	39;15	32;9	Heat shock cognate 71 kDa protein	HSPA8		2	41	39	32	29	31	30	21	22	23	23	31	26	27	30	28	19	21	22	22	30	25	24	26	23	15	17	19	19	25	19	57.7	56.7	49.1	70.897	646	646;639	0	323.31	46.6	47.4	43.7
P11216;P11217	P11216	15;3	15;3	12;0	Glycogen phosphorylase, brain form	PYGB		2	15	15	12	0	5	2	0	10	4	1	4	1	0	5	2	0	10	4	1	4	1	0	3	1	0	8	2	1	3	0	19.3	19.3	16	96.695	843	843;842	0	34.869	0	6.9	2
P11234;P11233	P11234	3;1	3;1	3;1	Ras-related protein Ral-B	RALB		2	3	3	3	1	1	0	0	0	1	0	1	0	1	1	0	0	0	1	0	1	0	1	1	0	0	0	1	0	1	0	12.1	12.1	12.1	23.408	206	206;206	0	5.1509	3.4	3.4	0
P11279	P11279	2	2	2	Lysosome-associated membrane glycoprotein 1	LAMP1		1	2	2	2	0	2	0	1	0	1	1	1	1	0	2	0	1	0	1	1	1	1	0	2	0	1	0	1	1	1	1	4.1	4.1	4.1	44.882	417	417	0	3.7993	0	4.1	0
P11362	P11362	1	1	1	Fibroblast growth factor receptor 1	FGFR1		1	1	1	1	1	0	0	1	1	1	1	1	1	1	0	0	1	1	1	1	1	1	1	0	0	1	1	1	1	1	1	1.1	1.1	1.1	91.867	822	822	0.0040956	2.4031	1.1	0	0
P11413	P11413	19	19	19	Glucose-6-phosphate 1-dehydrogenase	G6PD		1	19	19	19	5	8	5	5	8	5	5	7	6	5	8	5	5	8	5	5	7	6	5	8	5	5	8	5	5	7	6	36.1	36.1	36.1	59.256	515	515	0	85.86	10.5	16.5	9.9
P11464;P11465	P11464;P11465	4;2	2;1	1;1	Pregnancy-specific beta-1-glycoprotein 1;Pregnancy-specific beta-1-glycoprotein 2	PSG1;PSG2	;	2	4	2	1	3	0	0	4	0	0	2	0	0	1	0	0	2	0	0	1	0	0	0	0	0	1	0	0	0	0	0	11	6.2	2.4	47.222	419	419;335	0	12.078	8.6	0	0
P11586	P11586	2	2	2	C-1-tetrahydrofolate synthase, cytoplasmic;Methylenetetrahydrofolate dehydrogenase;Methenyltetrahydrofolate cyclohydrolase;Formyltetrahydrofolate synthetase;C-1-tetrahydrofolate synthase, cytoplasmic, N-terminally processed	MTHFD1		1	2	2	2	0	0	0	0	1	1	0	0	0	0	0	0	0	1	1	0	0	0	0	0	0	0	1	1	0	0	0	2.5	2.5	2.5	101.56	935	935	0.0036101	2.9504	0	0	0
P11717	P11717	75	75	75	Cation-independent mannose-6-phosphate receptor	IGF2R		1	75	75	75	16	49	36	18	51	40	21	57	42	16	49	36	18	51	40	21	57	42	16	49	36	18	51	40	21	57	42	30.6	30.6	30.6	274.37	2491	2491	0	323.31	6.7	24	15.7
P11766	P11766	8	8	8	Alcohol dehydrogenase class-3	ADH5		1	8	8	8	4	3	2	2	5	3	3	2	2	4	3	2	2	5	3	3	2	2	4	3	2	2	5	3	3	2	2	24.6	24.6	24.6	39.724	374	374	0	17.204	9.6	9.6	2.7
P11940;Q9H361;Q4VXU2;Q96DU9	P11940;Q9H361	18;10;5;1	18;10;5;1	13;8;3;1	Polyadenylate-binding protein 1;Polyadenylate-binding protein 3	PABPC1;PABPC3	;	4	18	18	13	7	11	6	6	11	6	8	10	7	7	11	6	6	11	6	8	10	7	6	6	3	4	8	5	6	7	4	27.2	27.2	17.1	70.67	636	636;631;614;382	0	67.595	11	20.6	11.5
P12004	P12004	4	4	4	Proliferating cell nuclear antigen	PCNA		1	4	4	4	0	0	1	0	2	0	3	0	0	0	0	1	0	2	0	3	0	0	0	0	1	0	2	0	3	0	0	16.5	16.5	16.5	28.768	261	261	0	9.89	0	0	5
P12081;P49590	P12081	11;3	11;3	11;3	Histidine--tRNA ligase, cytoplasmic	HARS		2	11	11	11	4	3	3	1	3	3	2	6	2	4	3	3	1	3	3	2	6	2	4	3	3	1	3	3	2	6	2	21.2	21.2	21.2	57.41	509	509;506	0	22.663	6.3	5.3	5.1
P12107	P12107	4	4	4	Collagen alpha-1(XI) chain	COL11A1		1	4	4	4	2	0	0	3	0	0	3	0	0	2	0	0	3	0	0	3	0	0	2	0	0	3	0	0	3	0	0	3.8	3.8	3.8	181.06	1806	1806	0	45.903	1.9	0	0
P12109	P12109	65	65	65	Collagen alpha-1(VI) chain	COL6A1		1	65	65	65	55	42	41	52	43	45	50	47	44	55	42	41	52	43	45	50	47	44	55	42	41	52	43	45	50	47	44	48	48	48	108.53	1028	1028	0	323.31	43.1	31.5	33.5
P12110	P12110	56	56	56	Collagen alpha-2(VI) chain	COL6A2		1	56	56	56	53	31	28	41	26	27	38	31	29	53	31	28	41	26	27	38	31	29	53	31	28	41	26	27	38	31	29	38.7	38.7	38.7	108.58	1019	1019	0	323.31	38.4	29.6	25.3
P12111	P12111	215	215	215	Collagen alpha-3(VI) chain	COL6A3		1	215	215	215	166	165	169	152	177	172	156	169	166	166	165	169	152	177	172	156	169	166	166	165	169	152	177	172	156	169	166	52.9	52.9	52.9	343.67	3177	3177	0	323.31	44	46.1	45.3
P12268	P12268	5	5	5	Inosine-5-monophosphate dehydrogenase 2	IMPDH2		1	5	5	5	0	0	0	0	3	1	2	3	0	0	0	0	0	3	1	2	3	0	0	0	0	0	3	1	2	3	0	14	14	14	55.804	514	514	0	16.525	0	0	0
P12270	P12270	2	2	2	Nucleoprotein TPR	TPR		1	2	2	2	0	0	0	0	0	0	1	0	1	0	0	0	0	0	0	1	0	1	0	0	0	0	0	0	1	0	1	1.1	1.1	1.1	267.29	2363	2363	0.004158	2.5384	0	0	0
P12272	P12272	3	3	3	Parathyroid hormone-related protein;PTHrP[1-36];PTHrP[38-94];Osteostatin	PTHLH		1	3	3	3	0	0	0	0	1	1	0	1	1	0	0	0	0	1	1	0	1	1	0	0	0	0	1	1	0	1	1	24.3	24.3	24.3	20.194	177	177	0	18.626	0	0	0
P12643	P12643	6	6	6	Bone morphogenetic protein 2	BMP2		1	6	6	6	0	5	4	0	3	3	0	5	5	0	5	4	0	3	3	0	5	5	0	5	4	0	3	3	0	5	5	24.5	24.5	24.5	44.701	396	396	0	58.671	0	19.2	13.1
P12814;P35609;Q08043	P12814	54;16;13	33;3;2	33;3;2	Alpha-actinin-1	ACTN1		3	54	33	33	44	31	27	30	32	28	36	37	27	26	15	14	15	15	14	18	20	13	26	15	14	15	15	14	18	20	13	61.8	40.7	40.7	103.06	892	892;894;901	0	312.29	55.2	35.2	32.1
P12955	P12955	3	3	3	Xaa-Pro dipeptidase	PEPD		1	3	3	3	1	1	1	1	0	1	1	2	1	1	1	1	1	0	1	1	2	1	1	1	1	1	0	1	1	2	1	5.5	5.5	5.5	54.548	493	493	0	6.9608	2	2	2
P12956	P12956	10	10	10	X-ray repair cross-complementing protein 6	XRCC6		1	10	10	10	3	2	1	1	6	1	7	6	2	3	2	1	1	6	1	7	6	2	3	2	1	1	6	1	7	6	2	18.9	18.9	18.9	69.842	609	609	0	47.886	6.2	3.6	2
P13010	P13010	7	7	7	X-ray repair cross-complementing protein 5	XRCC5		1	7	7	7	1	3	5	1	3	2	3	5	2	1	3	5	1	3	2	3	5	2	1	3	5	1	3	2	3	5	2	10.1	10.1	10.1	82.704	732	732	0	15.062	1.1	3.8	7.4
P13473	P13473	1	1	1	Lysosome-associated membrane glycoprotein 2	LAMP2		1	1	1	1	1	1	1	1	1	1	1	1	1	1	1	1	1	1	1	1	1	1	1	1	1	1	1	1	1	1	1	2	2	2	44.96	410	410	0.0066094	2.1522	2	2	2
P13489	P13489	6	6	6	Ribonuclease inhibitor	RNH1		1	6	6	6	1	4	2	2	1	5	2	2	2	1	4	2	2	1	5	2	2	2	1	4	2	2	1	5	2	2	2	18.2	18.2	18.2	49.973	461	461	0	24.511	2.2	12.4	5.6
P13497;Q9Y6L7;O43897	P13497	35;8;2	35;8;2	35;8;2	Bone morphogenetic protein 1	BMP1		3	35	35	35	20	7	6	19	8	7	17	9	12	20	7	6	19	8	7	17	9	12	20	7	6	19	8	7	17	9	12	40.7	40.7	40.7	111.25	986	986;1015;1013	0	153.56	23.2	7.3	6.2
P13521	P13521	3	3	3	Secretogranin-2;Secretoneurin;Manserin	SCG2		1	3	3	3	1	0	0	3	0	0	1	0	0	1	0	0	3	0	0	1	0	0	1	0	0	3	0	0	1	0	0	4.2	4.2	4.2	70.94	617	617	0.0036179	2.9896	1.1	0	0
P13611	P13611	29	29	29	Versican core protein	VCAN		1	29	29	29	20	14	14	10	16	17	13	13	21	20	14	14	10	16	17	13	13	21	20	14	14	10	16	17	13	13	21	7.7	7.7	7.7	372.82	3396	3396	0	263.48	6.3	4.7	4.8
P13612	P13612	3	3	3	Integrin alpha-4	ITGA4		1	3	3	3	0	0	0	0	0	0	3	0	0	0	0	0	0	0	0	3	0	0	0	0	0	0	0	0	3	0	0	2.7	2.7	2.7	114.9	1032	1032	0.000757	3.6007	0	0	0
P13639;Q15029	P13639	36;2	36;2	36;2	Elongation factor 2	EEF2		2	36	36	36	20	19	17	10	22	12	19	21	13	20	19	17	10	22	12	19	21	13	20	19	17	10	22	12	19	21	13	42	42	42	95.337	858	858;972	0	252	24.7	23.9	20.5
P13667	P13667	18	18	18	Protein disulfide-isomerase A4	PDIA4		1	18	18	18	5	7	5	2	10	5	6	8	6	5	7	5	2	10	5	6	8	6	5	7	5	2	10	5	6	8	6	29.6	29.6	29.6	72.932	645	645	0	62.032	9.3	8.8	9.3
P13674	P13674	4	4	4	Prolyl 4-hydroxylase subunit alpha-1	P4HA1		1	4	4	4	2	0	2	1	1	1	2	2	2	2	0	2	1	1	1	2	2	2	2	0	2	1	1	1	2	2	2	9.2	9.2	9.2	61.049	534	534	0	8.4255	3.9	0	4.7
P13693;Q9HAU6;Q56UQ5	P13693	8;2;2	8;2;2	8;2;2	Translationally-controlled tumor protein	TPT1		3	8	8	8	8	5	3	1	1	2	3	2	1	8	5	3	1	1	2	3	2	1	8	5	3	1	1	2	3	2	1	38.4	38.4	38.4	19.595	172	172;139;140	0	31.199	38.4	26.7	20.9
P13726	P13726	1	1	1	Tissue factor	F3		1	1	1	1	1	0	0	0	0	0	0	0	0	1	0	0	0	0	0	0	0	0	1	0	0	0	0	0	0	0	0	7.1	7.1	7.1	33.067	295	295	0.00075643	3.5994	7.1	0	0
P13727	P13727	4	4	4	Bone marrow proteoglycan;Eosinophil granule major basic protein	PRG2		1	4	4	4	0	0	0	0	4	1	0	2	2	0	0	0	0	4	1	0	2	2	0	0	0	0	4	1	0	2	2	14.9	14.9	14.9	25.205	222	222	0	9.8303	0	0	0
P13797;P13796	P13797	17;3	17;3	15;3	Plastin-3	PLS3		2	17	17	15	12	4	2	8	7	4	7	9	8	12	4	2	8	7	4	7	9	8	11	3	2	8	6	4	6	8	6	33	33	28.9	70.81	630	630;627	0	112.63	23.7	9.4	4
P13798	P13798	2	2	2	Acylamino-acid-releasing enzyme	APEH		1	2	2	2	0	0	0	1	0	0	1	0	0	0	0	0	1	0	0	1	0	0	0	0	0	1	0	0	1	0	0	3	3	3	81.224	732	732	0.0021946	3.1743	0	0	0
P13929	P13929	4	1	1	Beta-enolase	ENO3		1	4	1	1	1	4	2	1	1	2	1	2	1	0	1	0	0	0	0	0	0	0	0	1	0	0	0	0	0	0	0	15.4	6	6	46.986	434	434	0	22.268	4.1	15.4	6
P13987	P13987	5	5	5	CD59 glycoprotein	CD59		1	5	5	5	4	2	2	4	4	4	4	3	4	4	2	2	4	4	4	4	3	4	4	2	2	4	4	4	4	3	4	28.1	28.1	28.1	14.177	128	128	0	28.385	25.8	15.6	15.6
P14174	P14174	5	5	5	Macrophage migration inhibitory factor	MIF		1	5	5	5	3	2	3	3	3	2	5	4	3	3	2	3	3	3	2	5	4	3	3	2	3	3	3	2	5	4	3	27	27	27	12.476	115	115	0	23.388	20.9	17.4	20.9
P14209	P14209	1	1	1	CD99 antigen	CD99		1	1	1	1	1	1	0	0	0	0	0	0	0	1	1	0	0	0	0	0	0	0	1	1	0	0	0	0	0	0	0	5.4	5.4	5.4	18.848	185	185	0.00074516	3.4464	5.4	5.4	0
P14210	P14210	52	52	52	Hepatocyte growth factor;Hepatocyte growth factor alpha chain;Hepatocyte growth factor beta chain	HGF		1	52	52	52	32	23	33	20	32	27	24	30	29	32	23	33	20	32	27	24	30	29	32	23	33	20	32	27	24	30	29	55.9	55.9	55.9	83.133	728	728	0	323.31	42.6	28.2	37.4
P14314	P14314	15	15	15	Glucosidase 2 subunit beta	PRKCSH		1	15	15	15	14	6	3	7	8	5	9	7	6	14	6	3	7	8	5	9	7	6	14	6	3	7	8	5	9	7	6	29.2	29.2	29.2	59.425	528	528	0	124.79	27.1	11.6	5.7
P14543	P14543	48	48	47	Nidogen-1	NID1		1	48	48	47	42	14	14	34	19	19	37	26	21	42	14	14	34	19	19	37	26	21	41	14	14	33	18	19	36	25	21	36.4	36.4	36.4	136.38	1247	1247	0	323.31	31.8	12.7	11.1
P14550	P14550	6	6	6	Alcohol dehydrogenase [NADP(+)]	AKR1A1		1	6	6	6	3	3	1	2	1	1	3	3	1	3	3	1	2	1	1	3	3	1	3	3	1	2	1	1	3	3	1	21.2	21.2	21.2	36.573	325	325	0	72.195	11.1	10.8	4
P14618;P30613	P14618	41;1	41;1	41;1	Pyruvate kinase PKM	PKM		2	41	41	41	28	31	24	23	30	21	26	32	25	28	31	24	23	30	21	26	32	25	28	31	24	23	30	21	26	32	25	75.7	75.7	75.7	57.936	531	531;574	0	323.31	59.9	58	52.9
P14625;Q58FF3	P14625	26;6	25;6	25;6	Endoplasmin	HSP90B1		2	26	25	25	19	13	6	7	14	13	20	8	10	18	12	5	6	13	12	19	7	9	18	12	5	6	13	12	19	7	9	33.5	32	32	92.468	803	803;399	0	142.71	25.9	18.9	7.5
P14854	P14854	1	1	1	Cytochrome c oxidase subunit 6B1	COX6B1		1	1	1	1	1	1	0	0	0	1	1	1	1	1	1	0	0	0	1	1	1	1	1	1	0	0	0	1	1	1	1	12.8	12.8	12.8	10.192	86	86	0.00076336	3.7239	12.8	12.8	0
P14866;Q8WVV9	P14866	4;1	4;1	4;1	Heterogeneous nuclear ribonucleoprotein L	HNRNPL		2	4	4	4	1	2	2	0	1	1	1	3	1	1	2	2	0	1	1	1	3	1	1	2	2	0	1	1	1	3	1	6.8	6.8	6.8	64.132	589	589;542	0	6.0835	2.2	2.9	3.4
P14868	P14868	2	2	2	Aspartate--tRNA ligase, cytoplasmic	DARS		1	2	2	2	0	1	0	0	0	1	0	1	0	0	1	0	0	0	1	0	1	0	0	1	0	0	0	1	0	1	0	3.8	3.8	3.8	57.136	501	501	0.0041237	2.4565	0	1.8	0
P15018	P15018	10	10	10	Leukemia inhibitory factor	LIF		1	10	10	10	0	7	7	0	7	9	0	8	7	0	7	7	0	7	9	0	8	7	0	7	7	0	7	9	0	8	7	36.6	36.6	36.6	22.007	202	202	0	137.84	0	30.2	29.7
P15056;P10398;P04049	P15056;P10398;P04049	2;1;1	2;1;1	2;1;1	Serine/threonine-protein kinase B-raf;Serine/threonine-protein kinase A-Raf;RAF proto-oncogene serine/threonine-protein kinase	BRAF;ARAF;RAF1	;;	3	2	2	2	0	0	1	0	1	0	0	2	0	0	0	1	0	1	0	0	2	0	0	0	1	0	1	0	0	2	0	2.6	2.6	2.6	84.436	766	766;606;648	0.0007485	3.4795	0	0	1.4
P15104	P15104	2	2	2	Glutamine synthetase	GLUL		1	2	2	2	0	0	1	0	1	0	1	1	1	0	0	1	0	1	0	1	1	1	0	0	1	0	1	0	1	1	1	6.4	6.4	6.4	42.064	373	373	0	3.9107	0	0	2.1
P15121;C9JRZ8	P15121	17;1	17;1	17;1	Aldose reductase	AKR1B1		2	17	17	17	11	11	7	9	8	8	12	13	9	11	11	7	9	8	8	12	13	9	11	11	7	9	8	8	12	13	9	53.2	53.2	53.2	35.853	316	316;316	0	89.81	32	43.4	29.7
P15144	P15144	38	38	38	Aminopeptidase N	ANPEP		1	38	38	38	22	23	20	15	25	23	17	29	24	22	23	20	15	25	23	17	29	24	22	23	20	15	25	23	17	29	24	29.5	29.5	29.5	109.54	967	967	0	323.31	22.5	21.1	20.7
P15151	P15151	4	4	4	Poliovirus receptor	PVR		1	4	4	4	3	2	2	3	2	2	3	1	2	3	2	2	3	2	2	3	1	2	3	2	2	3	2	2	3	1	2	6.7	6.7	6.7	45.302	417	417	0	9.8148	6.7	3.6	3.6
P15170;Q8IYD1	P15170;Q8IYD1	7;6	7;6	7;6	Eukaryotic peptide chain release factor GTP-binding subunit ERF3A;Eukaryotic peptide chain release factor GTP-binding subunit ERF3B	GSPT1;GSPT2	;	2	7	7	7	2	4	3	1	4	2	5	4	3	2	4	3	1	4	2	5	4	3	2	4	3	1	4	2	5	4	3	12.4	12.4	12.4	55.755	499	499;628	0	16.118	3.8	8.4	6.4
P15289	P15289	2	2	2	Arylsulfatase A;Arylsulfatase A component B;Arylsulfatase A component C	ARSA		1	2	2	2	0	0	0	1	1	0	0	2	0	0	0	0	1	1	0	0	2	0	0	0	0	1	1	0	0	2	0	4.9	4.9	4.9	53.588	507	507	0	6.4761	0	0	0
P15291	P15291	4	4	4	Beta-1,4-galactosyltransferase 1;Lactose synthase A protein;N-acetyllactosamine synthase;Beta-N-acetylglucosaminylglycopeptide beta-1,4-galactosyltransferase;Beta-N-acetylglucosaminyl-glycolipid beta-1,4-galactosyltransferase;Processed beta-1,4-galactosyltransferase 1	B4GALT1		1	4	4	4	3	2	2	1	2	2	3	2	2	3	2	2	1	2	2	3	2	2	3	2	2	1	2	2	3	2	2	11.8	11.8	11.8	43.92	398	398	0	38.292	9	5.8	5.8
P15309	P15309	16	16	16	Prostatic acid phosphatase;PAPf39	ACPP		1	16	16	16	3	10	8	4	14	9	3	13	11	3	10	8	4	14	9	3	13	11	3	10	8	4	14	9	3	13	11	32.6	32.6	32.6	44.566	386	386	0	288.11	10.1	26.7	22
P15311	P15311	23	12	11	Ezrin	EZR		1	23	12	11	16	12	10	11	12	12	16	16	12	8	3	1	3	3	4	9	8	6	8	3	1	3	3	4	8	8	6	31.6	20.8	19.5	69.412	586	586	0	40.208	24.2	12.1	8.9
P15374	P15374	1	1	1	Ubiquitin carboxyl-terminal hydrolase isozyme L3	UCHL3		1	1	1	1	0	1	1	0	1	1	1	1	1	0	1	1	0	1	1	1	1	1	0	1	1	0	1	1	1	1	1	3.9	3.9	3.9	26.182	230	230	0.0053333	2.1894	0	3.9	3.9
P15514	P15514	5	5	5	Amphiregulin	AREG		1	5	5	5	1	3	3	1	3	5	1	2	3	1	3	3	1	3	5	1	2	3	1	3	3	1	3	5	1	2	3	15.5	15.5	15.5	27.895	252	252	0	145.82	4.4	14.7	14.7
P15531	P15531	10	10	5	Nucleoside diphosphate kinase A	NME1		1	10	10	5	9	8	9	6	5	8	8	7	5	9	8	9	6	5	8	8	7	5	5	4	5	4	3	4	4	3	3	57.9	57.9	27	17.149	152	152	0	61.692	52	57.9	57.9
P15559	P15559	2	2	2	NAD(P)H dehydrogenase [quinone] 1	NQO1		1	2	2	2	0	1	1	0	2	1	0	2	1	0	1	1	0	2	1	0	2	1	0	1	1	0	2	1	0	2	1	6.6	6.6	6.6	30.867	274	274	0	5.8021	0	3.6	3.6
P15586	P15586	7	7	7	N-acetylglucosamine-6-sulfatase	GNS		1	7	7	7	7	2	2	4	2	0	2	1	1	7	2	2	4	2	0	2	1	1	7	2	2	4	2	0	2	1	1	13.8	13.8	13.8	62.081	552	552	0	22.17	13.8	3.4	3.4
P15692	P15692	2	2	2	Vascular endothelial growth factor A	VEGFA		1	2	2	2	0	0	1	0	2	2	0	2	1	0	0	1	0	2	2	0	2	1	0	0	1	0	2	2	0	2	1	8.6	8.6	8.6	27.042	232	232	0	12.926	0	0	3.9
P15848	P15848	2	2	2	Arylsulfatase B	ARSB		1	2	2	2	0	0	0	0	0	0	0	1	1	0	0	0	0	0	0	0	1	1	0	0	0	0	0	0	0	1	1	3	3	3	59.687	533	533	0.0034965	2.6415	0	0	0
P15880	P15880	8	8	8	40S ribosomal protein S2	RPS2		1	8	8	8	4	2	3	4	4	6	5	4	5	4	2	3	4	4	6	5	4	5	4	2	3	4	4	6	5	4	5	29.7	29.7	29.7	31.324	293	293	0	20.49	16.4	6.8	10.2
P15924	P15924	1	1	1	Desmoplakin	DSP		1	1	1	1	0	0	0	0	0	0	1	0	0	0	0	0	0	0	0	1	0	0	0	0	0	0	0	0	1	0	0	0.3	0.3	0.3	331.77	2871	2871	1	-2	0	0	0
P16035	P16035	20	20	20	Metalloproteinase inhibitor 2	TIMP2		1	20	20	20	17	14	10	16	13	11	16	14	13	17	14	10	16	13	11	16	14	13	17	14	10	16	13	11	16	14	13	56.8	56.8	56.8	24.399	220	220	0	323.31	55.5	47.7	44.1
P16070	P16070	10	10	10	CD44 antigen	CD44		1	10	10	10	8	10	9	8	8	8	8	8	9	8	10	9	8	8	8	8	8	9	8	10	9	8	8	8	8	8	9	8	8	8	81.537	742	742	0	72.62	7.4	8	8
P16152	P16152	13	13	10	Carbonyl reductase [NADPH] 1	CBR1		1	13	13	10	8	3	3	3	5	4	5	8	3	8	3	3	3	5	4	5	8	3	6	2	1	1	2	2	3	5	2	64.6	64.6	51.3	30.375	277	277	0	113.53	33.9	14.1	13.7
P16234	P16234	10	10	10	Platelet-derived growth factor receptor alpha	PDGFRA		1	10	10	10	8	7	6	4	7	5	5	8	7	8	7	6	4	7	5	5	8	7	8	7	6	4	7	5	5	8	7	10	10	10	122.67	1089	1089	0	56.422	8.5	6.1	3.9
P16278	P16278	4	4	4	Beta-galactosidase	GLB1		1	4	4	4	1	1	1	1	1	1	2	3	1	1	1	1	1	1	1	2	3	1	1	1	1	1	1	1	2	3	1	7.5	7.5	7.5	76.074	677	677	0	18.923	2.2	1.6	1.6
P16930	P16930	3	3	3	Fumarylacetoacetase	FAH		1	3	3	3	1	0	0	0	0	0	1	2	0	1	0	0	0	0	0	1	2	0	1	0	0	0	0	0	1	2	0	7.4	7.4	7.4	46.374	419	419	0	8.2908	2.4	0	0
P16949;Q9H169	P16949	13;2	13;2	8;0	Stathmin	STMN1		2	13	13	8	12	5	5	4	4	4	8	6	3	12	5	5	4	4	4	8	6	3	7	3	4	3	4	3	7	5	2	57.7	57.7	45.6	17.302	149	149;189	0	53.541	57.7	28.9	33.6
P17050	P17050	2	2	2	Alpha-N-acetylgalactosaminidase	NAGA		1	2	2	2	1	0	0	1	0	0	1	0	0	1	0	0	1	0	0	1	0	0	1	0	0	1	0	0	1	0	0	5.4	5.4	5.4	46.564	411	411	0	4.2179	2.4	0	0
P17066;P48741	P17066;P48741	12;8	2;2	2;2	Heat shock 70 kDa protein 6;Putative heat shock 70 kDa protein 7	HSPA6;HSPA7	;	2	12	2	2	6	9	8	7	10	5	9	10	12	2	2	1	1	2	0	2	1	2	2	2	1	1	2	0	2	1	2	16.2	3.7	3.7	71.027	643	643;367	0	117.7	10.1	11.5	10.1
P17096	P17096	5	5	5	High mobility group protein HMG-I/HMG-Y	HMGA1		1	5	5	5	3	3	3	1	2	2	1	2	4	3	3	3	1	2	2	1	2	4	3	3	3	1	2	2	1	2	4	47.7	47.7	47.7	11.676	107	107	0	47.4	38.3	33.6	33.6
P17174	P17174	9	9	9	Aspartate aminotransferase, cytoplasmic	GOT1		1	9	9	9	4	2	1	4	4	3	7	4	5	4	2	1	4	4	3	7	4	5	4	2	1	4	4	3	7	4	5	27.8	27.8	27.8	46.247	413	413	0	36.257	12.3	6.8	2.2
P17301	P17301	21	21	21	Integrin alpha-2	ITGA2		1	21	21	21	12	12	7	11	13	13	11	15	13	12	12	7	11	13	13	11	15	13	12	12	7	11	13	13	11	15	13	17.5	17.5	17.5	129.29	1181	1181	0	155.7	11.2	9.1	5.2
P17612;P22694	P17612;P22694	2;1	2;1	2;1	cAMP-dependent protein kinase catalytic subunit alpha;cAMP-dependent protein kinase catalytic subunit beta	PRKACA;PRKACB	;	2	2	2	2	0	0	1	1	0	2	1	0	2	0	0	1	1	0	2	1	0	2	0	0	1	1	0	2	1	0	2	6.3	6.3	6.3	40.589	351	351;351	0	5.0361	0	0	2.6
P17655	P17655	6	6	6	Calpain-2 catalytic subunit	CAPN2		1	6	6	6	1	3	0	0	3	0	2	3	2	1	3	0	0	3	0	2	3	2	1	3	0	0	3	0	2	3	2	9.9	9.9	9.9	79.994	700	700	0	13.446	1	3.3	0
P17693	P17693	1	1	1	HLA class I histocompatibility antigen, alpha chain G	HLA-G		1	1	1	1	0	1	0	0	1	1	1	1	1	0	1	0	0	1	1	1	1	1	0	1	0	0	1	1	1	1	1	3	3	3	38.224	338	338	0.00074571	3.4521	0	3	0
P17812	P17812	2	2	2	CTP synthase 1	CTPS1		1	2	2	2	0	1	0	0	1	1	0	2	0	0	1	0	0	1	1	0	2	0	0	1	0	0	1	1	0	2	0	4.1	4.1	4.1	66.69	591	591	0	5.2543	0	2	0
P17813	P17813	6	6	6	Endoglin	ENG		1	6	6	6	2	0	0	2	0	2	3	0	3	2	0	0	2	0	2	3	0	3	2	0	0	2	0	2	3	0	3	10.5	10.5	10.5	70.577	658	658	0	13.148	3.2	0	0
P17900	P17900	5	5	5	Ganglioside GM2 activator;Ganglioside GM2 activator isoform short	GM2A		1	5	5	5	3	2	2	3	1	4	3	1	0	3	2	2	3	1	4	3	1	0	3	2	2	3	1	4	3	1	0	27.5	27.5	27.5	20.838	193	193	0	35.834	17.6	5.7	5.7
P17931	P17931	5	5	5	Galectin-3	LGALS3		1	5	5	5	2	2	2	3	2	2	4	2	1	2	2	2	3	2	2	4	2	1	2	2	2	3	2	2	4	2	1	21.2	21.2	21.2	26.152	250	250	0	12.421	10	10	10
P17936	P17936	13	13	13	Insulin-like growth factor-binding protein 3	IGFBP3		1	13	13	13	11	2	4	10	3	5	9	4	5	11	2	4	10	3	5	9	4	5	11	2	4	10	3	5	9	4	5	34.4	34.4	34.4	31.674	291	291	0	35.067	30.2	6.5	12.7
P17948	P17948	30	30	30	Vascular endothelial growth factor receptor 1	FLT1		1	30	30	30	19	18	15	16	20	13	14	14	13	19	18	15	16	20	13	14	14	13	19	18	15	16	20	13	14	14	13	18.8	18.8	18.8	150.77	1338	1338	0	135.75	12.9	12.5	9
P17980	P17980	2	2	2	26S protease regulatory subunit 6A	PSMC3		1	2	2	2	0	1	0	1	0	1	1	1	1	0	1	0	1	0	1	1	1	1	0	1	0	1	0	1	1	1	1	5.9	5.9	5.9	49.203	439	439	0	7.6978	0	2.1	0
P17987	P17987	15	15	15	T-complex protein 1 subunit alpha	TCP1		1	15	15	15	3	8	10	2	9	8	8	9	7	3	8	10	2	9	8	8	9	7	3	8	10	2	9	8	8	9	7	30.9	30.9	30.9	60.343	556	556	0	90.107	5.6	16.4	20.5
P18065	P18065	3	3	3	Insulin-like growth factor-binding protein 2	IGFBP2		1	3	3	3	1	0	0	0	1	0	2	1	1	1	0	0	0	1	0	2	1	1	1	0	0	0	1	0	2	1	1	8.6	8.6	8.6	34.814	325	325	0	5.3124	3.7	0	0
P18077	P18077	7	7	7	60S ribosomal protein L35a	RPL35A		1	7	7	7	4	3	2	1	2	2	2	2	2	4	3	2	1	2	2	2	2	2	4	3	2	1	2	2	2	2	2	41.8	41.8	41.8	12.538	110	110	0	11.541	23.6	23.6	14.5
P18124	P18124	7	7	7	60S ribosomal protein L7	RPL7		1	7	7	7	6	1	0	1	3	1	5	2	2	6	1	0	1	3	1	5	2	2	6	1	0	1	3	1	5	2	2	33.9	33.9	33.9	29.225	248	248	0	16.887	26.2	5.6	0
P18206	P18206	55	55	55	Vinculin	VCL		1	55	55	55	40	23	16	22	23	20	31	26	20	40	23	16	22	23	20	31	26	20	40	23	16	22	23	20	31	26	20	46.6	46.6	46.6	123.8	1134	1134	0	323.31	41.4	22.6	14.9
P18564	P18564	1	1	1	Integrin beta-6	ITGB6		1	1	1	1	1	1	1	1	1	1	1	1	1	1	1	1	1	1	1	1	1	1	1	1	1	1	1	1	1	1	1	1.1	1.1	1.1	85.935	788	788	0.0035714	2.838	1.1	1.1	1.1
P18621	P18621	3	3	3	60S ribosomal protein L17	RPL17		1	3	3	3	2	2	1	0	1	0	1	1	1	2	2	1	0	1	0	1	1	1	2	2	1	0	1	0	1	1	1	12	12	12	21.397	184	184	0	6.2574	12	10.9	5.4
P18669;P15259;Q8N0Y7	P18669	12;5;5	12;5;5	12;5;5	Phosphoglycerate mutase 1	PGAM1		3	12	12	12	9	7	9	7	8	8	9	9	7	9	7	9	7	8	8	9	9	7	9	7	9	7	8	8	9	9	7	48.8	48.8	48.8	28.804	254	254;253;254	0	260.57	37.4	29.1	33.5
P19021	P19021	27	27	27	Peptidyl-glycine alpha-amidating monooxygenase;Peptidylglycine alpha-hydroxylating monooxygenase;Peptidyl-alpha-hydroxyglycine alpha-amidating lyase	PAM		1	27	27	27	22	10	11	19	10	15	16	15	13	22	10	11	19	10	15	16	15	13	22	10	11	19	10	15	16	15	13	29.1	29.1	29.1	108.33	973	973	0	163.05	26.5	12.2	13.7
P19022	P19022	14	14	14	Cadherin-2	CDH2		1	14	14	14	9	9	8	6	10	12	6	9	11	9	9	8	6	10	12	6	9	11	9	9	8	6	10	12	6	9	11	19.1	19.1	19.1	99.808	906	906	0	126.07	11.4	13.1	9.9
P19105;O14950	P19105;O14950	5;5	5;5	4;4	Myosin regulatory light chain 12A;Myosin regulatory light chain 12B	MYL12A;MYL12B	;	2	5	5	4	3	3	2	1	3	4	3	3	1	3	3	2	1	3	4	3	3	1	2	2	2	1	3	3	2	3	1	24.6	24.6	18.1	19.794	171	171;172	0	37.386	19.3	19.3	12.9
P19174	P19174	2	2	2	1-phosphatidylinositol 4,5-bisphosphate phosphodiesterase gamma-1	PLCG1		1	2	2	2	1	2	1	1	1	1	1	1	0	1	2	1	1	1	1	1	1	0	1	2	1	1	1	1	1	1	0	2.3	2.3	2.3	148.53	1290	1290	0	4.4678	0.9	2.3	0.9
P19338	P19338	17	17	17	Nucleolin	NCL		1	17	17	17	5	12	10	2	12	6	9	12	11	5	12	10	2	12	6	9	12	11	5	12	10	2	12	6	9	12	11	20.6	20.6	20.6	76.613	710	710	0	65.619	7.9	15.4	12.4
P19367;Q2TB90;P52789	P19367	10;1;1	10;1;1	10;1;1	Hexokinase-1	HK1		3	10	10	10	4	1	4	1	5	4	3	5	3	4	1	4	1	5	4	3	5	3	4	1	4	1	5	4	3	5	3	11.5	11.5	11.5	102.48	917	917;917;917	0	41.925	5.3	1.7	4.5
P19623	P19623	2	2	2	Spermidine synthase	SRM		1	2	2	2	0	1	1	1	2	1	2	1	1	0	1	1	1	2	1	2	1	1	0	1	1	1	2	1	2	1	1	6	6	6	33.824	302	302	0	7.8098	0	3.3	3.3
P19875	P19875	4	3	2	C-X-C motif chemokine 2;GRO-beta(5-73)	CXCL2		1	4	3	2	1	3	2	0	2	2	1	3	2	0	2	1	0	1	1	0	2	1	0	1	0	0	0	0	0	1	0	41.1	41.1	29	11.389	107	107	0	26.275	15	37.4	27.1
P19876	P19876	3	1	1	C-X-C motif chemokine 3;GRO-gamma(5-73)	CXCL3		1	3	1	1	1	3	3	0	3	3	1	3	3	0	1	1	0	1	1	0	1	1	0	1	1	0	1	1	0	1	1	34.6	7.5	7.5	11.342	107	107	0.0035562	2.81	15	34.6	34.6
P19883	P19883	18	18	18	Follistatin	FST		1	18	18	18	6	11	8	8	11	9	5	10	11	6	11	8	8	11	9	5	10	11	6	11	8	8	11	9	5	10	11	60.5	60.5	60.5	38.007	344	344	0	110.3	17.7	34.9	24.1
P20020;Q16720;P23634;Q01814	P20020;Q16720;P23634;Q01814	3;2;2;2	3;2;2;2	3;2;2;2	Plasma membrane calcium-transporting ATPase 1;Plasma membrane calcium-transporting ATPase 3;Plasma membrane calcium-transporting ATPase 4;Plasma membrane calcium-transporting ATPase 2	ATP2B1;ATP2B3;ATP2B4;ATP2B2	;;;	4	3	3	3	2	0	1	0	0	1	0	1	0	2	0	1	0	0	1	0	1	0	2	0	1	0	0	1	0	1	0	2.9	2.9	2.9	138.75	1258	1258;1220;1241;1243	0	4.3802	1.4	0	1.5
P20062	P20062	2	2	2	Transcobalamin-2	TCN2		1	2	2	2	2	0	0	1	0	0	2	0	0	2	0	0	1	0	0	2	0	0	2	0	0	1	0	0	2	0	0	5.6	5.6	5.6	47.534	427	427	0	5.5527	5.6	0	0
P20290	P20290	3	3	3	Transcription factor BTF3	BTF3		1	3	3	3	1	0	1	0	1	0	0	1	1	1	0	1	0	1	0	0	1	1	1	0	1	0	1	0	0	1	1	16	16	16	22.168	206	206	0.0022059	3.2481	9.2	0	3.4
P20592	P20592	1	1	1	Interferon-induced GTP-binding protein Mx2	MX2		1	1	1	1	0	0	0	1	0	0	0	0	0	0	0	0	1	0	0	0	0	0	0	0	0	1	0	0	0	0	0	1.4	1.4	1.4	82.088	715	715	1	-2	0	0	0
P20618	P20618	5	5	5	Proteasome subunit beta type-1	PSMB1		1	5	5	5	3	3	3	2	3	1	4	3	3	3	3	3	2	3	1	4	3	3	3	3	3	2	3	1	4	3	3	24.5	24.5	24.5	26.489	241	241	0	30.297	14.9	13.7	17
P20700	P20700	6	3	3	Lamin-B1	LMNB1		1	6	3	3	0	1	1	0	0	0	5	0	0	0	0	0	0	0	0	3	0	0	0	0	0	0	0	0	3	0	0	7	3.2	3.2	66.408	586	586	0.003574	2.8384	0	1.5	1.4
P20809	P20809	9	9	9	Interleukin-11	IL11		1	9	9	9	1	5	5	1	7	8	2	7	7	1	5	5	1	7	8	2	7	7	1	5	5	1	7	8	2	7	7	41.2	41.2	41.2	21.429	199	199	0	59.819	5	24.6	18.6
P20810	P20810	2	2	2	Calpastatin	CAST		1	2	2	2	2	1	0	1	1	0	2	1	0	2	1	0	1	1	0	2	1	0	2	1	0	1	1	0	2	1	0	4.4	4.4	4.4	76.572	708	708	0	4.2221	4.4	1.8	0
P20908	P20908	20	20	20	Collagen alpha-1(V) chain	COL5A1		1	20	20	20	16	7	5	8	7	6	10	9	7	16	7	5	8	7	6	10	9	7	16	7	5	8	7	6	10	9	7	11.8	11.8	11.8	183.56	1838	1838	0	113.92	10.3	4.6	3.5
P20933	P20933	6	6	6	N(4)-(beta-N-acetylglucosaminyl)-L-asparaginase;Glycosylasparaginase alpha chain;Glycosylasparaginase beta chain	AGA		1	6	6	6	3	1	1	2	3	0	1	2	1	3	1	1	2	3	0	1	2	1	3	1	1	2	3	0	1	2	1	16.5	16.5	16.5	37.208	346	346	0	10.78	9	2	2
P20962	P20962	3	3	3	Parathymosin	PTMS		1	3	3	3	1	2	2	0	1	1	2	1	2	1	2	2	0	1	1	2	1	2	1	2	2	0	1	1	2	1	2	23.5	23.5	23.5	11.53	102	102	0	7.416	11.8	23.5	23.5
P21246	P21246	7	7	7	Pleiotrophin	PTN		1	7	7	7	6	1	1	4	1	2	7	1	1	6	1	1	4	1	2	7	1	1	6	1	1	4	1	2	7	1	1	50.6	50.6	50.6	18.942	168	168	0	41.086	46.4	6	6
P21281;P15313	P21281;P15313	2;1	2;1	2;1	V-type proton ATPase subunit B, brain isoform;V-type proton ATPase subunit B, kidney isoform	ATP6V1B2;ATP6V1B1	;	2	2	2	2	0	1	1	0	0	0	1	1	1	0	1	1	0	0	0	1	1	1	0	1	1	0	0	0	1	1	1	6.7	6.7	6.7	56.5	511	511;513	0	9.6957	0	3.9	3.9
P21291	P21291	8	8	8	Cysteine and glycine-rich protein 1	CSRP1		1	8	8	8	6	5	2	3	5	5	3	5	3	6	5	2	3	5	5	3	5	3	6	5	2	3	5	5	3	5	3	57	57	57	20.567	193	193	0	64.609	47.2	34.2	16.6
P21333	P21333	119	119	109	Filamin-A	FLNA		1	119	119	109	83	69	53	68	75	55	82	70	44	83	69	53	68	75	55	82	70	44	76	64	49	62	69	50	75	65	38	50.4	50.4	47.6	280.74	2647	2647	0	323.31	38.9	31.9	26
P21399	P21399	6	6	6	Cytoplasmic aconitate hydratase	ACO1		1	6	6	6	0	4	1	1	5	2	1	5	1	0	4	1	1	5	2	1	5	1	0	4	1	1	5	2	1	5	1	6.3	6.3	6.3	98.398	889	889	0	11.397	0	3.6	0.9
P21589	P21589	18	18	18	5-nucleotidase	NT5E		1	18	18	18	10	11	10	9	13	10	6	9	11	10	11	10	9	13	10	6	9	11	10	11	10	9	13	10	6	9	11	30	30	30	63.367	574	574	0	226.71	19.3	24	18.8
P21741	P21741	2	2	2	Midkine	MDK		1	2	2	2	0	0	0	0	2	1	0	0	1	0	0	0	0	2	1	0	0	1	0	0	0	0	2	1	0	0	1	20.3	20.3	20.3	15.585	143	143	0	4.2694	0	0	0
P21810	P21810	25	24	24	Biglycan	BGN		1	25	24	24	21	15	16	21	17	17	22	18	18	21	14	15	20	16	16	21	17	17	21	14	15	20	16	16	21	17	17	49.7	49.7	49.7	41.654	368	368	0	323.31	45.7	40.2	42.1
P21926	P21926	3	3	3	CD9 antigen	CD9		1	3	3	3	1	0	0	1	0	0	0	0	1	1	0	0	1	0	0	0	0	1	1	0	0	1	0	0	0	0	1	9.2	9.2	9.2	25.416	228	228	0	6.0376	4.4	0	0
P21980	P21980	7	7	7	Protein-glutamine gamma-glutamyltransferase 2	TGM2		1	7	7	7	1	2	0	1	1	1	6	1	0	1	2	0	1	1	1	6	1	0	1	2	0	1	1	1	6	1	0	9.5	9.5	9.5	77.328	687	687	0	15.032	1.7	2.3	0
P22061	P22061	4	4	4	Protein-L-isoaspartate(D-aspartate) O-methyltransferase	PCMT1		1	4	4	4	3	3	1	2	2	3	0	3	3	3	3	1	2	2	3	0	3	3	3	3	1	2	2	3	0	3	3	22.5	22.5	22.5	24.636	227	227	0	39.721	18.5	18.5	7.5
P22102	P22102	3	3	3	Trifunctional purine biosynthetic protein adenosine-3;Phosphoribosylamine--glycine ligase;Phosphoribosylformylglycinamidine cyclo-ligase;Phosphoribosylglycinamide formyltransferase	GART		1	3	3	3	0	1	1	0	2	1	2	1	1	0	1	1	0	2	1	2	1	1	0	1	1	0	2	1	2	1	1	3.6	3.6	3.6	107.77	1010	1010	0	12.36	0	1.6	1.6
P22234	P22234	3	3	3	Multifunctional protein ADE2;Phosphoribosylaminoimidazole-succinocarboxamide synthase;Phosphoribosylaminoimidazole carboxylase	PAICS		1	3	3	3	1	0	1	1	0	1	2	1	0	1	0	1	1	0	1	2	1	0	1	0	1	1	0	1	2	1	0	5.4	5.4	5.4	47.079	425	425	0	7.0777	2.6	0	2.8
P22304	P22304	3	3	3	Iduronate 2-sulfatase;Iduronate 2-sulfatase 42 kDa chain;Iduronate 2-sulfatase 14 kDa chain	IDS		1	3	3	3	0	1	1	0	1	2	0	3	1	0	1	1	0	1	2	0	3	1	0	1	1	0	1	2	0	3	1	5.6	5.6	5.6	61.872	550	550	0	8.9803	0	1.6	1.6
P22307	P22307	3	3	3	Non-specific lipid-transfer protein	SCP2		1	3	3	3	0	0	1	0	1	1	1	3	0	0	0	1	0	1	1	1	3	0	0	0	1	0	1	1	1	3	0	6	6	6	58.993	547	547	0	8.9493	0	0	2
P22314	P22314	12	12	12	Ubiquitin-like modifier-activating enzyme 1	UBA1		1	12	12	12	1	5	1	2	5	4	7	8	7	1	5	1	2	5	4	7	8	7	1	5	1	2	5	4	7	8	7	12.6	12.6	12.6	117.85	1058	1058	0	66.741	0.8	6	1
P22392;O60361	P22392;O60361	10;7	5;5	5;5	Nucleoside diphosphate kinase B;Putative nucleoside diphosphate kinase	NME2;NME2P1	;	2	10	5	5	8	7	7	5	5	7	8	8	5	4	3	3	3	3	3	4	4	3	4	3	3	3	3	3	4	4	3	54.6	23.7	23.7	17.298	152	152;137	0	12.18	48.7	50	50
P22413	P22413	14	14	14	Ectonucleotide pyrophosphatase/phosphodiesterase family member 1;Alkaline phosphodiesterase I;Nucleotide pyrophosphatase	ENPP1		1	14	14	14	3	1	5	5	2	7	3	6	9	3	1	5	5	2	7	3	6	9	3	1	5	5	2	7	3	6	9	16.3	16.3	16.3	104.92	925	925	0	41.269	3.5	1.2	5.9
P22626	P22626	17	17	17	Heterogeneous nuclear ribonucleoproteins A2/B1	HNRNPA2B1		1	17	17	17	10	8	9	6	11	6	10	11	7	10	8	9	6	11	6	10	11	7	10	8	9	6	11	6	10	11	7	41.9	41.9	41.9	37.429	353	353	0	87.915	31.7	21.8	24.9
P22692	P22692	14	14	14	Insulin-like growth factor-binding protein 4	IGFBP4		1	14	14	14	11	6	6	12	8	6	13	7	6	11	6	6	12	8	6	13	7	6	11	6	6	12	8	6	13	7	6	41.5	41.5	41.5	27.934	258	258	0	234.85	31.8	25.2	25.2
P22888	P22888	1	1	1	Lutropin-choriogonadotropic hormone receptor	LHCGR		1	1	1	1	0	1	1	0	0	0	0	0	0	0	1	1	0	0	0	0	0	0	0	1	1	0	0	0	0	0	0	1.6	1.6	1.6	78.642	699	699	1	-2	0	1.6	1.6
P23142	P23142	34	34	18	Fibulin-1	FBLN1		1	34	34	18	26	16	14	25	18	14	26	15	21	26	16	14	25	18	14	26	15	21	15	8	9	14	9	8	14	7	10	43.7	43.7	24.3	77.213	703	703	0	323.31	35.8	25.7	23.2
P23229	P23229	8	8	8	Integrin alpha-6;Integrin alpha-6 heavy chain;Integrin alpha-6 light chain;Processed integrin alpha-6	ITGA6		1	8	8	8	1	0	0	2	1	0	1	4	1	1	0	0	2	1	0	1	4	1	1	0	0	2	1	0	1	4	1	7.2	7.2	7.2	126.6	1130	1130	0	20.752	1.4	0	0
P23246	P23246	4	4	3	Splicing factor, proline- and glutamine-rich	SFPQ		1	4	4	3	0	2	1	0	2	2	2	1	1	0	2	1	0	2	2	2	1	1	0	1	1	0	2	2	2	1	1	7.2	7.2	6.1	76.149	707	707	0	23.392	0	3.3	2.1
P23284	P23284	18	18	18	Peptidyl-prolyl cis-trans isomerase B	PPIB		1	18	18	18	17	15	13	9	12	9	11	15	11	17	15	13	9	12	9	11	15	11	17	15	13	9	12	9	11	15	11	62.5	62.5	62.5	23.742	216	216	0	323.31	62.5	60.6	57.4
P23352	P23352	6	6	6	Anosmin-1	KAL1		1	6	6	6	0	1	2	0	0	3	0	1	5	0	1	2	0	0	3	0	1	5	0	1	2	0	0	3	0	1	5	11.8	11.8	11.8	76.111	680	680	0	13.572	0	1.5	4.4
P23381	P23381	10	10	10	Tryptophan--tRNA ligase, cytoplasmic;T1-TrpRS;T2-TrpRS	WARS		1	10	10	10	3	3	2	3	5	5	6	5	4	3	3	2	3	5	5	6	5	4	3	3	2	3	5	5	6	5	4	27.2	27.2	27.2	53.165	471	471	0	96.346	9.8	8.5	6.2
P23396	P23396	13	13	13	40S ribosomal protein S3	RPS3		1	13	13	13	5	7	4	1	4	3	7	7	3	5	7	4	1	4	3	7	7	3	5	7	4	1	4	3	7	7	3	54.3	54.3	54.3	26.688	243	243	0	43.487	21.8	32.9	19.8
P23470	P23470	6	6	6	Receptor-type tyrosine-protein phosphatase gamma	PTPRG		1	6	6	6	4	3	3	3	3	4	4	3	6	4	3	3	3	3	4	4	3	6	4	3	3	3	3	4	4	3	6	6.2	6.2	6.2	162	1445	1445	0	79.094	3.7	2.8	2.8
P23526	P23526	9	9	9	Adenosylhomocysteinase	AHCY		1	9	9	9	1	1	1	3	2	3	3	4	4	1	1	1	3	2	3	3	4	4	1	1	1	3	2	3	3	4	4	19.2	19.2	19.2	47.716	432	432	0	20.846	2.5	2.8	2.8
P23528	P23528	20	20	17	Cofilin-1	CFL1		1	20	20	17	15	13	11	10	13	12	13	15	12	15	13	11	10	13	12	13	15	12	12	12	10	9	12	11	12	13	11	75.3	75.3	61.4	18.502	166	166	0	323.31	71.1	58.4	60.2
P23582	P23582	3	3	3	C-type natriuretic peptide;CNP-22;CNP-29;CNP-53	NPPC		1	3	3	3	0	2	1	0	2	1	0	2	1	0	2	1	0	2	1	0	2	1	0	2	1	0	2	1	0	2	1	24.6	24.6	24.6	13.246	126	126	0	6.6342	0	14.3	7.1
P23588	P23588	4	4	4	Eukaryotic translation initiation factor 4B	EIF4B		1	4	4	4	0	1	1	0	1	0	3	2	1	0	1	1	0	1	0	3	2	1	0	1	1	0	1	0	3	2	1	7	7	7	69.15	611	611	0	24.743	0	2	1.1
P24043	P24043	72	72	72	Laminin subunit alpha-2	LAMA2		1	72	72	72	59	6	7	40	11	11	45	11	12	59	6	7	40	11	11	45	11	12	59	6	7	40	11	11	45	11	12	24.8	24.8	24.8	343.9	3122	3122	0	323.31	21.1	2.4	2.6
P24534	P24534	9	5	5	Elongation factor 1-beta	EEF1B2		1	9	5	5	3	6	5	2	5	3	4	6	1	2	5	3	2	3	1	3	3	1	2	5	3	2	3	1	3	3	1	29.3	20.4	20.4	24.763	225	225	0	68.088	15.1	23.6	15.1
P24592	P24592	12	12	12	Insulin-like growth factor-binding protein 6	IGFBP6		1	12	12	12	9	7	6	8	11	7	9	9	9	9	7	6	8	11	7	9	9	9	9	7	6	8	11	7	9	9	9	39.6	39.6	39.6	25.322	240	240	0	323.31	34.2	32.1	32.1
P24593	P24593	30	30	30	Insulin-like growth factor-binding protein 5	IGFBP5		1	30	30	30	26	23	24	18	19	20	21	22	22	26	23	24	18	19	20	21	22	22	26	23	24	18	19	20	21	22	22	68	68	68	30.57	272	272	0	323.31	65.8	64.3	57
P24666	P24666	1	1	1	Low molecular weight phosphotyrosine protein phosphatase	ACP1		1	1	1	1	0	1	0	0	0	0	0	1	0	0	1	0	0	0	0	0	1	0	0	1	0	0	0	0	0	1	0	7.6	7.6	7.6	18.042	158	158	0.00074184	3.4008	0	7.6	0
P24821	P24821	95	95	95	Tenascin	TNC		1	95	95	95	66	72	57	56	64	60	53	69	66	66	72	57	56	64	60	53	69	66	66	72	57	56	64	60	53	69	66	39.6	39.6	39.6	240.85	2201	2201	0	323.31	31.7	31.8	26.9
P24844	P24844	3	2	2	Myosin regulatory light polypeptide 9	MYL9		1	3	2	2	1	1	1	0	1	1	1	0	1	0	0	1	0	1	0	0	0	1	0	0	1	0	1	0	0	0	1	24.4	18	18	19.827	172	172	0.0036075	2.939	6.4	6.4	6.4
P25311	P25311	2	2	2	Zinc-alpha-2-glycoprotein	AZGP1		1	2	2	2	0	1	1	0	1	1	0	1	0	0	1	1	0	1	1	0	1	0	0	1	1	0	1	1	0	1	0	6.4	6.4	6.4	34.258	298	298	0.0053512	2.2104	0	2.3	2.3
P25391	P25391	7	6	6	Laminin subunit alpha-1	LAMA1		1	7	6	6	2	0	0	3	0	0	5	1	0	1	0	0	3	0	0	4	1	0	1	0	0	3	0	0	4	1	0	1.9	1.7	1.7	337.08	3075	3075	0	10.076	0.5	0	0
P25398	P25398	8	8	8	40S ribosomal protein S12	RPS12		1	8	8	8	6	4	5	4	5	6	7	6	6	6	4	5	4	5	6	7	6	6	6	4	5	4	5	6	7	6	6	48.5	48.5	48.5	14.515	132	132	0	79.062	43.9	31.8	40.9
P25774	P25774	7	7	7	Cathepsin S	CTSS		1	7	7	7	0	6	2	0	5	5	0	6	5	0	6	2	0	5	5	0	6	5	0	6	2	0	5	5	0	6	5	26.3	26.3	26.3	37.495	331	331	0	106.89	0	21.8	7.6
P25786	P25786	7	7	7	Proteasome subunit alpha type-1	PSMA1		1	7	7	7	3	4	3	2	2	3	3	3	2	3	4	3	2	2	3	3	3	2	3	4	3	2	2	3	3	3	2	30	30	30	29.555	263	263	0	46.546	13.3	16.7	11
P25787	P25787	8	8	8	Proteasome subunit alpha type-2	PSMA2		1	8	8	8	3	3	3	2	3	3	3	4	2	3	3	3	2	3	3	3	4	2	3	3	3	2	3	3	3	4	2	33.8	33.8	33.8	25.898	234	234	0	21.409	19.7	12.4	12
P25788	P25788	7	7	7	Proteasome subunit alpha type-3	PSMA3		1	7	7	7	3	1	0	1	4	0	4	4	2	3	1	0	1	4	0	4	4	2	3	1	0	1	4	0	4	4	2	29.4	29.4	29.4	28.433	255	255	0	18.135	12.9	4.7	0
P25789	P25789	7	7	7	Proteasome subunit alpha type-4	PSMA4		1	7	7	7	1	2	1	2	5	3	3	4	2	1	2	1	2	5	3	3	4	2	1	2	1	2	5	3	3	4	2	24.1	24.1	24.1	29.483	261	261	0	17.368	3.8	9.2	3.8
P25940	P25940	4	4	4	Collagen alpha-3(V) chain	COL5A3		1	4	4	4	0	2	0	0	1	2	0	1	0	0	2	0	0	1	2	0	1	0	0	2	0	0	1	2	0	1	0	3.3	3.3	3.3	172.12	1745	1745	0	11.191	0	1.1	0
P26006	P26006	8	8	8	Integrin alpha-3;Integrin alpha-3 heavy chain;Integrin alpha-3 light chain	ITGA3		1	8	8	8	3	3	1	2	3	3	4	4	4	3	3	1	2	3	3	4	4	4	3	3	1	2	3	3	4	4	4	8.6	8.6	8.6	116.61	1051	1051	0	24.414	2.9	2.9	0.9
P26022	P26022	13	13	13	Pentraxin-related protein PTX3	PTX3		1	13	13	13	12	6	4	10	7	3	11	8	6	12	6	4	10	7	3	11	8	6	12	6	4	10	7	3	11	8	6	35.2	35.2	35.2	41.975	381	381	0	198.88	32.8	21	11.3
P26038	P26038	47	47	32	Moesin	MSN		1	47	47	32	36	29	25	23	25	20	28	28	21	36	29	25	23	25	20	28	28	21	24	19	15	15	16	12	21	19	15	53.7	53.7	38.6	67.819	577	577	0	323.31	46.3	35.5	29.3
P26196	P26196	2	2	2	Probable ATP-dependent RNA helicase DDX6	DDX6		1	2	2	2	0	0	1	0	1	1	0	2	0	0	0	1	0	1	1	0	2	0	0	0	1	0	1	1	0	2	0	4.3	4.3	4.3	54.416	483	483	0.0029049	3.0197	0	0	2.3
P26368	P26368	2	2	2	Splicing factor U2AF 65 kDa subunit	U2AF2		1	2	2	2	0	0	0	0	0	0	1	1	0	0	0	0	0	0	0	1	1	0	0	0	0	0	0	0	1	1	0	5.5	5.5	5.5	53.5	475	475	0	4.4702	0	0	0
P26373	P26373	8	8	8	60S ribosomal protein L13	RPL13		1	8	8	8	3	2	3	1	3	2	7	6	4	3	2	3	1	3	2	7	6	4	3	2	3	1	3	2	7	6	4	33.6	33.6	33.6	24.261	211	211	0	36.957	12.8	12.3	17.5
P26447	P26447	9	9	9	Protein S100-A4	S100A4		1	9	9	9	7	5	6	5	5	5	6	7	3	7	5	6	5	5	5	6	7	3	7	5	6	5	5	5	6	7	3	49.5	49.5	49.5	11.728	101	101	0	29.54	41.6	33.7	41.6
P26572	P26572	9	9	9	Alpha-1,3-mannosyl-glycoprotein 2-beta-N-acetylglucosaminyltransferase	MGAT1		1	9	9	9	5	1	0	6	3	1	5	5	2	5	1	0	6	3	1	5	5	2	5	1	0	6	3	1	5	5	2	20	20	20	50.878	445	445	0	29.172	10.1	2.5	0
P26599	P26599	3	3	3	Polypyrimidine tract-binding protein 1	PTBP1		1	3	3	3	0	2	3	0	2	1	1	0	0	0	2	3	0	2	1	1	0	0	0	2	3	0	2	1	1	0	0	6	6	6	57.221	531	531	0	7.8866	0	3.8	6
P26639	P26639	5	5	5	Threonine--tRNA ligase, cytoplasmic	TARS		1	5	5	5	0	0	0	2	3	1	1	1	0	0	0	0	2	3	1	1	1	0	0	0	0	2	3	1	1	1	0	7.2	7.2	7.2	83.434	723	723	0	8.8818	0	0	0
P26640	P26640	2	2	2	Valine--tRNA ligase	VARS		1	2	2	2	0	0	0	0	0	1	0	1	0	0	0	0	0	0	1	0	1	0	0	0	0	0	0	1	0	1	0	2.1	2.1	2.1	140.47	1264	1264	0	5.9175	0	0	0
P26641	P26641	12	12	12	Elongation factor 1-gamma	EEF1G		1	12	12	12	4	5	7	3	8	4	5	6	8	4	5	7	3	8	4	5	6	8	4	5	7	3	8	4	5	6	8	27.2	27.2	27.2	50.118	437	437	0	47.644	10.5	13.7	13.7
P26885	P26885	3	3	3	Peptidyl-prolyl cis-trans isomerase FKBP2	FKBP2		1	3	3	3	1	0	0	1	0	1	2	1	1	1	0	0	1	0	1	2	1	1	1	0	0	1	0	1	2	1	1	19.7	19.7	19.7	15.649	142	142	0	4.7164	5.6	0	0
P27348	P27348	18	12	11	14-3-3 protein theta	YWHAQ		1	18	12	11	12	8	9	5	8	4	10	9	7	8	5	7	5	5	3	8	7	6	7	5	7	5	5	3	8	7	6	60.8	49.4	46.5	27.764	245	245	0	140.87	40.4	27.8	35.5
P27635;Q96L21	P27635;Q96L21	8;5	8;5	8;5	60S ribosomal protein L10;60S ribosomal protein L10-like	RPL10;RPL10L	;	2	8	8	8	5	2	3	4	4	1	5	2	2	5	2	3	4	4	1	5	2	2	5	2	3	4	4	1	5	2	2	34.1	34.1	34.1	24.604	214	214;214	0	18.31	22.9	7.5	13.1
P27695	P27695	3	3	3	DNA-(apurinic or apyrimidinic site) lyase;DNA-(apurinic or apyrimidinic site) lyase, mitochondrial	APEX1		1	3	3	3	0	0	0	0	0	0	2	2	0	0	0	0	0	0	0	2	2	0	0	0	0	0	0	0	2	2	0	13.5	13.5	13.5	35.554	318	318	0	16.163	0	0	0
P27797	P27797	18	18	18	Calreticulin	CALR		1	18	18	18	13	8	7	8	8	8	14	7	7	13	8	7	8	8	8	14	7	7	13	8	7	8	8	8	14	7	7	32.9	32.9	32.9	48.141	417	417	0	129.84	25.9	16.8	14.6
P27816	P27816	19	19	19	Microtubule-associated protein 4	MAP4		1	19	19	19	10	5	3	3	7	3	8	9	3	10	5	3	3	7	3	8	9	3	10	5	3	3	7	3	8	9	3	19.7	19.7	19.7	121	1152	1152	0	59.565	10.7	5.9	3.6
P27824	P27824	2	2	2	Calnexin	CANX		1	2	2	2	1	0	0	0	0	1	0	0	1	1	0	0	0	0	1	0	0	1	1	0	0	0	0	1	0	0	1	3.7	3.7	3.7	67.567	592	592	0	5.5213	2	0	0
P28066	P28066	4	4	4	Proteasome subunit alpha type-5	PSMA5		1	4	4	4	1	3	2	1	2	4	2	3	1	1	3	2	1	2	4	2	3	1	1	3	2	1	2	4	2	3	1	19.1	19.1	19.1	26.411	241	241	0	26.351	7.9	14.9	7.1
P28070	P28070	4	4	4	Proteasome subunit beta type-4	PSMB4		1	4	4	4	1	1	1	1	1	3	1	2	2	1	1	1	1	1	3	1	2	2	1	1	1	1	1	3	1	2	2	11.7	11.7	11.7	29.204	264	264	0	8.6704	4.9	3	3
P28072	P28072	4	4	4	Proteasome subunit beta type-6	PSMB6		1	4	4	4	1	1	2	0	2	2	3	2	2	1	1	2	0	2	2	3	2	2	1	1	2	0	2	2	3	2	2	16.7	16.7	16.7	25.357	239	239	0	13.788	4.6	4.6	8.8
P28074	P28074	10	10	10	Proteasome subunit beta type-5	PSMB5		1	10	10	10	3	7	4	1	5	3	7	4	0	3	7	4	1	5	3	7	4	0	3	7	4	1	5	3	7	4	0	31.6	31.6	31.6	28.48	263	263	0	36.359	14.1	23.2	14.1
P28300	P28300	10	8	8	Protein-lysine 6-oxidase	LOX		1	10	8	8	8	2	5	10	4	4	7	4	3	7	2	4	8	3	3	6	3	2	7	2	4	8	3	3	6	3	2	29.5	27.1	27.1	46.944	417	417	0	85.147	29	7	15.6
P28482	P28482	3	3	3	Mitogen-activated protein kinase 1	MAPK1		1	3	3	3	0	1	1	1	1	1	2	2	1	0	1	1	1	1	1	2	2	1	0	1	1	1	1	1	2	2	1	7.5	7.5	7.5	41.389	360	360	0	4.6062	0	1.9	1.9
P28715	P28715	1	1	1	DNA repair protein complementing XP-G cells	ERCC5		1	1	1	1	0	1	0	0	0	0	0	0	0	0	1	0	0	0	0	0	0	0	0	1	0	0	0	0	0	0	0	0.8	0.8	0.8	133.11	1186	1186	1	-2	0	0.8	0
P28799	P28799	14	14	14	Granulins;Acrogranin;Paragranulin;Granulin-1;Granulin-2;Granulin-3;Granulin-4;Granulin-5;Granulin-6;Granulin-7	GRN		1	14	14	14	11	7	6	7	5	10	7	7	8	11	7	6	7	5	10	7	7	8	11	7	6	7	5	10	7	7	8	24.3	24.3	24.3	63.544	593	593	0	94.43	21.4	12.3	10.5
P28838	P28838	8	8	8	Cytosol aminopeptidase	LAP3		1	8	8	8	1	3	1	2	2	0	2	4	1	1	3	1	2	2	0	2	4	1	1	3	1	2	2	0	2	4	1	19.1	19.1	19.1	56.166	519	519	0	21.368	2.3	6.9	2.3
P29144	P29144	2	2	2	Tripeptidyl-peptidase 2	TPP2		1	2	2	2	0	0	0	0	0	1	0	1	0	0	0	0	0	0	1	0	1	0	0	0	0	0	0	1	0	1	0	1.8	1.8	1.8	138.35	1249	1249	0	5.8862	0	0	0
P29218	P29218	3	3	3	Inositol monophosphatase 1	IMPA1		1	3	3	3	2	3	2	0	1	1	1	2	0	2	3	2	0	1	1	1	2	0	2	3	2	0	1	1	1	2	0	11.6	11.6	11.6	30.188	277	277	0	8.2091	7.6	11.6	7.6
P29279	P29279	4	4	4	Connective tissue growth factor	CTGF		1	4	4	4	3	0	0	1	2	1	2	0	2	3	0	0	1	2	1	2	0	2	3	0	0	1	2	1	2	0	2	12	12	12	38.091	349	349	0	9.3555	9.5	0	0
P29373	P29373	4	4	4	Cellular retinoic acid-binding protein 2	CRABP2		1	4	4	4	1	0	0	1	1	0	1	1	1	1	0	0	1	1	0	1	1	1	1	0	0	1	1	0	1	1	1	31.2	31.2	31.2	15.693	138	138	0	8.1344	7.2	0	0
P29401	P29401	16	16	16	Transketolase	TKT		1	16	16	16	9	10	7	3	10	6	8	11	6	9	10	7	3	10	6	8	11	6	9	10	7	3	10	6	8	11	6	27.6	27.6	27.6	67.877	623	623	0	108.5	19.4	18.5	11.2
P29692	P29692	12	12	8	Elongation factor 1-delta	EEF1D		1	12	12	8	2	3	4	2	6	3	6	7	2	2	3	4	2	6	3	6	7	2	1	2	2	2	4	1	5	4	2	38.4	38.4	31.3	31.121	281	281	0	148.85	11.7	13.9	14.9
P29966	P29966	2	2	2	Myristoylated alanine-rich C-kinase substrate	MARCKS		1	2	2	2	2	0	1	1	0	1	2	1	1	2	0	1	1	0	1	2	1	1	2	0	1	1	0	1	2	1	1	10.2	10.2	10.2	31.554	332	332	0	43.431	10.2	0	3.3
P30040	P30040	3	3	3	Endoplasmic reticulum resident protein 29	ERP29		1	3	3	3	2	1	1	2	3	1	2	2	1	2	1	1	2	3	1	2	2	1	2	1	1	2	3	1	2	2	1	11.5	11.5	11.5	28.993	261	261	0	6.5741	8.4	3.8	3.8
P30041	P30041	16	16	16	Peroxiredoxin-6	PRDX6		1	16	16	16	13	7	5	7	8	7	12	7	7	13	7	5	7	8	7	12	7	7	13	7	5	7	8	7	12	7	7	58.5	58.5	58.5	25.035	224	224	0	180.85	58.5	35.3	28.6
P30043	P30043	1	1	1	Flavin reductase (NADPH)	BLVRB		1	1	1	1	0	1	0	0	0	0	1	0	0	0	1	0	0	0	0	1	0	0	0	1	0	0	0	0	1	0	0	4.9	4.9	4.9	22.119	206	206	0.0022043	3.2353	0	4.9	0
P30044	P30044	7	7	7	Peroxiredoxin-5, mitochondrial	PRDX5		1	7	7	7	1	3	3	2	3	2	2	6	2	1	3	3	2	3	2	2	6	2	1	3	3	2	3	2	2	6	2	36.9	36.9	36.9	22.086	214	214	0	15.624	3.7	17.8	17.8
P30046;A6NHG4	P30046;A6NHG4	2;2	2;2	2;2	D-dopachrome decarboxylase;D-dopachrome decarboxylase-like protein	DDT;DDTL	;	2	2	2	2	1	1	0	0	0	0	1	1	1	1	1	0	0	0	0	1	1	1	1	1	0	0	0	0	1	1	1	27.1	27.1	27.1	12.712	118	118;134	0	14.608	16.9	10.2	0
P30048	P30048	6	6	6	Thioredoxin-dependent peroxide reductase, mitochondrial	PRDX3		1	6	6	6	1	0	2	1	2	1	3	1	1	1	0	2	1	2	1	3	1	1	1	0	2	1	2	1	3	1	1	22.3	22.3	22.3	27.692	256	256	0	12.74	3.9	0	10.2
P30050	P30050	8	8	8	60S ribosomal protein L12	RPL12		1	8	8	8	2	5	4	4	3	4	3	5	5	2	5	4	4	3	4	3	5	5	2	5	4	4	3	4	3	5	5	64.8	64.8	64.8	17.818	165	165	0	61.566	14.5	34.5	29.1
P30085	P30085	6	6	6	UMP-CMP kinase	CMPK1		1	6	6	6	4	3	2	2	3	2	4	5	3	4	3	2	2	3	2	4	5	3	4	3	2	2	3	2	4	5	3	36.7	36.7	36.7	22.222	196	196	0	59.779	26	16.8	12.8
P30086	P30086	13	13	13	Phosphatidylethanolamine-binding protein 1;Hippocampal cholinergic neurostimulating peptide	PEBP1		1	13	13	13	7	10	4	10	8	6	9	7	5	7	10	4	10	8	6	9	7	5	7	10	4	10	8	6	9	7	5	87.7	87.7	87.7	21.057	187	187	0	133.13	52.4	75.9	26.2
P30101	P30101	30	30	30	Protein disulfide-isomerase A3	PDIA3		1	30	30	30	23	20	15	14	21	16	16	20	19	23	20	15	14	21	16	16	20	19	23	20	15	14	21	16	16	20	19	65.5	65.5	65.5	56.782	505	505	0	323.31	52.9	46.7	31.5
P30153;P30154	P30153	6;2	6;2	6;2	Serine/threonine-protein phosphatase 2A 65 kDa regulatory subunit A alpha isoform	PPP2R1A		2	6	6	6	2	3	1	0	1	3	2	3	3	2	3	1	0	1	3	2	3	3	2	3	1	0	1	3	2	3	3	12.6	12.6	12.6	65.308	589	589;601	0	23.631	3.4	7.3	1.7
P30443;P30455;P04439;P13746;Q09160;P05534	P30443;P30455;P04439;P13746;Q09160;P05534	14;13;11;9;9;7	10;9;7;5;6;3	3;2;0;0;0;0	HLA class I histocompatibility antigen, A-1 alpha chain;HLA class I histocompatibility antigen, A-36 alpha chain;HLA class I histocompatibility antigen, A-3 alpha chain;HLA class I histocompatibility antigen, A-11 alpha chain;HLA class I histocompatibility antigen, A-80 alpha chain;HLA class I histocompatibility antigen, A-24 alpha chain	HLA-A	;;;;;	6	14	10	3	9	5	4	5	9	7	7	6	8	6	2	1	2	6	4	3	4	5	0	1	0	0	2	1	0	0	2	42.5	28.8	5.2	40.845	365	365;365;365;365;365;365	0	51.837	36.2	20	18.1
P30460;P30480;P30462	P30460;P30480;P30462	14;13;9	1;0;1	0;0;0	HLA class I histocompatibility antigen, B-8 alpha chain;HLA class I histocompatibility antigen, B-42 alpha chain;HLA class I histocompatibility antigen, B-14 alpha chain	HLA-B	;;	3	14	1	0	9	6	6	7	8	8	6	10	6	0	1	0	0	0	0	0	0	0	0	0	0	0	0	0	0	0	0	41.4	3	0	40.33	362	362;362;362	1	-2	33.1	22.4	24.9
P30479	P30479	14	10	0	HLA class I histocompatibility antigen, B-41 alpha chain	HLA-B		1	14	10	0	9	5	6	7	8	9	7	11	6	6	3	4	4	5	6	5	7	3	0	0	0	0	0	0	0	0	0	39.8	35.6	0	40.539	362	362	0	175.48	32.3	21.5	27.1
P30499;P13747	P30499	12;1	1;0	1;0	HLA class I histocompatibility antigen, Cw-1 alpha chain	HLA-C		2	12	1	1	7	6	5	6	7	5	4	9	8	0	0	0	1	0	0	0	0	0	0	0	0	1	0	0	0	0	0	28.1	5.7	5.7	40.964	366	366;358	0	36.269	22.4	23	18
P30508;P30510;Q29960;P30504;P30505;Q9TNN7;P16189	P30508;P30510;Q29960;P30504;P30505	15;12;9;9;9;7;6	3;2;1;2;2;2;1	0;0;0;0;0;0;0	HLA class I histocompatibility antigen, Cw-12 alpha chain;HLA class I histocompatibility antigen, Cw-14 alpha chain;HLA class I histocompatibility antigen, Cw-16 alpha chain;HLA class I histocompatibility antigen, Cw-4 alpha chain;HLA class I histocompatibility antigen, Cw-8 alpha chain	HLA-C	;;;;	7	15	3	0	10	9	9	8	10	8	9	9	11	3	3	3	1	2	1	1	2	2	0	0	0	0	0	0	0	0	0	44.3	11.2	0	40.885	366	366;366;366;366;366;366;365	0	35.14	37.4	35.5	36.1
P30520;Q8N142	P30520	4;1	4;1	4;1	Adenylosuccinate synthetase isozyme 2	ADSS		2	4	4	4	1	2	1	1	2	1	4	1	2	1	2	1	1	2	1	4	1	2	1	2	1	1	2	1	4	1	2	10.5	10.5	10.5	50.097	456	456;457	0	12.334	3.1	5.9	2.9
P30530	P30530	5	5	5	Tyrosine-protein kinase receptor UFO	AXL		1	5	5	5	5	4	4	5	4	3	4	3	4	5	4	4	5	4	3	4	3	4	5	4	4	5	4	3	4	3	4	6.2	6.2	6.2	98.335	894	894	0	62.03	6.2	4.8	4.8
P30533	P30533	5	5	5	Alpha-2-macroglobulin receptor-associated protein	LRPAP1		1	5	5	5	0	1	1	0	2	2	0	3	1	0	1	1	0	2	2	0	3	1	0	1	1	0	2	2	0	3	1	14	14	14	41.465	357	357	0	8.5132	0	2.2	2
P30626	P30626	2	2	2	Sorcin	SRI		1	2	2	2	0	1	0	0	0	0	0	1	0	0	1	0	0	0	0	0	1	0	0	1	0	0	0	0	0	1	0	10.1	10.1	10.1	21.676	198	198	0.0021978	3.1774	0	4.5	0
P30740	P30740	5	4	4	Leukocyte elastase inhibitor	SERPINB1		1	5	4	4	1	2	2	1	2	2	3	3	3	0	1	1	0	1	2	2	2	2	0	1	1	0	1	2	2	2	2	13.2	10.6	10.6	42.741	379	379	0	12.447	2.6	5.3	5.3
P31025;Q5VSP4	P31025;Q5VSP4	2;1	2;1	2;1	Lipocalin-1;Putative lipocalin 1-like protein 1	LCN1;LCN1P1	;	2	2	2	2	0	0	0	1	0	0	2	0	0	0	0	0	1	0	0	2	0	0	0	0	0	1	0	0	2	0	0	12.5	12.5	12.5	19.25	176	176;162	0	5.0239	0	0	0
P31150	P31150	8	3	3	Rab GDP dissociation inhibitor alpha	GDI1		1	8	3	3	4	2	1	0	1	1	3	3	2	2	1	0	0	0	0	0	1	0	2	1	0	0	0	0	0	1	0	16.8	8.3	8.3	50.582	447	447	0	5.5833	10.3	4.3	2
P31153;Q00266	P31153	6;1	6;1	6;1	S-adenosylmethionine synthase isoform type-2	MAT2A		2	6	6	6	0	3	2	1	3	2	1	5	2	0	3	2	1	3	2	1	5	2	0	3	2	1	3	2	1	5	2	16.5	16.5	16.5	43.66	395	395;395	0	14.014	0	9.4	5.6
P31431	P31431	5	5	5	Syndecan-4	SDC4		1	5	5	5	3	4	3	3	3	2	3	3	4	3	4	3	3	3	2	3	3	4	3	4	3	3	3	2	3	3	4	25.3	25.3	25.3	21.641	198	198	0	83.969	18.2	25.3	18.2
P31689	P31689	2	2	2	DnaJ homolog subfamily A member 1	DNAJA1		1	2	2	2	0	0	0	0	2	1	1	1	1	0	0	0	0	2	1	1	1	1	0	0	0	0	2	1	1	1	1	5.5	5.5	5.5	44.868	397	397	0.0034868	2.6067	0	0	0
P31939	P31939	11	11	11	Bifunctional purine biosynthesis protein PURH;Phosphoribosylaminoimidazolecarboxamide formyltransferase;IMP cyclohydrolase	ATIC		1	11	11	11	3	4	3	1	4	5	4	4	6	3	4	3	1	4	5	4	4	6	3	4	3	1	4	5	4	4	6	20.9	20.9	20.9	64.615	592	592	0	29.407	5.4	6.1	4.7
P31943;P55795;P52597	P31943;P55795	3;2;1	3;2;1	3;2;1	Heterogeneous nuclear ribonucleoprotein H;Heterogeneous nuclear ribonucleoprotein H, N-terminally processed;Heterogeneous nuclear ribonucleoprotein H2	HNRNPH1;HNRNPH2	;	3	3	3	3	0	0	1	0	1	2	0	2	2	0	0	1	0	1	2	0	2	2	0	0	1	0	1	2	0	2	2	8.9	8.9	8.9	49.229	449	449;449;415	0	9.2659	0	0	2.2
P31946	P31946	16	6	6	14-3-3 protein beta/alpha;14-3-3 protein beta/alpha, N-terminally processed	YWHAB		1	16	6	6	10	7	6	2	7	5	6	5	4	3	4	4	2	3	3	4	3	3	3	4	4	2	3	3	4	3	3	51.6	30.9	30.9	28.082	246	246	0	95.304	32.1	27.2	26.4
P31947	P31947	6	1	1	14-3-3 protein sigma	SFN		1	6	1	1	4	3	3	1	4	1	3	3	2	1	0	1	1	1	0	1	1	1	1	0	1	1	1	0	1	1	1	16.9	3.2	3.2	27.774	248	248	0.0035311	2.7589	12.9	7.7	10.1
P31948	P31948	16	16	16	Stress-induced-phosphoprotein 1	STIP1		1	16	16	16	4	7	5	1	6	3	4	8	7	4	7	5	1	6	3	4	8	7	4	7	5	1	6	3	4	8	7	27.4	27.4	27.4	62.639	543	543	0	43.626	8.3	13.6	8.7
P31949	P31949	4	4	4	Protein S100-A11;Protein S100-A11, N-terminally processed	S100A11		1	4	4	4	4	3	4	2	1	1	3	1	2	4	3	4	2	1	1	3	1	2	4	3	4	2	1	1	3	1	2	27.6	27.6	27.6	11.74	105	105	0	80.205	27.6	19	27.6
P32004	P32004	4	4	4	Neural cell adhesion molecule L1	L1CAM		1	4	4	4	2	0	0	2	0	0	2	0	0	2	0	0	2	0	0	2	0	0	2	0	0	2	0	0	2	0	0	3.9	3.9	3.9	140	1257	1257	0	10.995	2.2	0	0
P32119	P32119	10	9	9	Peroxiredoxin-2	PRDX2		1	10	9	9	5	9	6	4	7	7	7	9	4	4	8	5	3	6	6	6	8	3	4	8	5	3	6	6	6	8	3	60.1	54.5	54.5	21.892	198	198	0	39.465	25.3	42.9	28.3
P32321	P32321	1	1	1	Deoxycytidylate deaminase	DCTD		1	1	1	1	0	0	0	0	1	0	1	0	0	0	0	0	0	1	0	1	0	0	0	0	0	0	1	0	1	0	0	8.4	8.4	8.4	20.016	178	178	0.00076394	3.7292	0	0	0
P32455	P32455	1	1	1	Interferon-induced guanylate-binding protein 1	GBP1		1	1	1	1	0	0	0	0	1	0	1	0	0	0	0	0	0	1	0	1	0	0	0	0	0	0	1	0	1	0	0	1.5	1.5	1.5	67.93	592	592	0.0041181	2.4445	0	0	0
P32969	P32969	3	3	3	60S ribosomal protein L9	RPL9		1	3	3	3	0	1	0	0	3	0	0	2	1	0	1	0	0	3	0	0	2	1	0	1	0	0	3	0	0	2	1	16.1	16.1	16.1	21.863	192	192	0	6.8484	0	7.3	0
P33176;O60282;Q12840	P33176;O60282;Q12840	8;5;4	8;5;4	8;5;4	Kinesin-1 heavy chain;Kinesin heavy chain isoform 5C;Kinesin heavy chain isoform 5A	KIF5B;KIF5C;KIF5A	;;	3	8	8	8	0	1	1	0	5	3	2	5	2	0	1	1	0	5	3	2	5	2	0	1	1	0	5	3	2	5	2	9.8	9.8	9.8	109.68	963	963;957;1032	0	29.278	0	0.9	1.1
P33316	P33316	3	3	3	Deoxyuridine 5-triphosphate nucleotidohydrolase, mitochondrial	DUT		1	3	3	3	2	0	0	2	0	0	2	0	0	2	0	0	2	0	0	2	0	0	2	0	0	2	0	0	2	0	0	12.7	12.7	12.7	26.563	252	252	0	5.5937	8.7	0	0
P33908	P33908	6	6	6	Mannosyl-oligosaccharide 1,2-alpha-mannosidase IA	MAN1A1		1	6	6	6	1	0	0	2	0	0	3	0	0	1	0	0	2	0	0	3	0	0	1	0	0	2	0	0	3	0	0	7.8	7.8	7.8	72.968	653	653	0	8.3307	1.1	0	0
P33992	P33992	1	1	1	DNA replication licensing factor MCM5	MCM5		1	1	1	1	0	0	1	0	0	0	0	0	0	0	0	1	0	0	0	0	0	0	0	0	1	0	0	0	0	0	0	1.4	1.4	1.4	82.285	734	734	0.0053872	2.2977	0	0	1.4
P34059	P34059	4	4	4	N-acetylgalactosamine-6-sulfatase	GALNS		1	4	4	4	1	0	0	0	1	0	0	2	1	1	0	0	0	1	0	0	2	1	1	0	0	0	1	0	0	2	1	10.3	10.3	10.3	58.025	522	522	0	7.9354	2.1	0	0
P34096	P34096	10	10	10	Ribonuclease 4	RNASE4		1	10	10	10	10	2	1	5	3	4	6	3	4	10	2	1	5	3	4	6	3	4	10	2	1	5	3	4	6	3	4	61.9	61.9	61.9	16.84	147	147	0	51.65	61.9	21.1	9.5
P34932	P34932	17	15	15	Heat shock 70 kDa protein 4	HSPA4		1	17	15	15	8	5	5	7	5	6	7	12	6	7	4	4	5	5	4	5	10	4	7	4	4	5	5	4	5	10	4	24.2	21.5	21.5	94.33	840	840	0	76.981	10.7	6.5	7.3
P35052	P35052	22	22	22	Glypican-1;Secreted glypican-1	GPC1		1	22	22	22	19	7	5	17	5	8	15	7	6	19	7	5	17	5	8	15	7	6	19	7	5	17	5	8	15	7	6	37.6	37.6	37.6	61.68	558	558	0	203.37	33.5	15.4	11.3
P35080	P35080	2	2	2	Profilin-2	PFN2		1	2	2	2	2	1	1	1	1	1	1	1	1	2	1	1	1	1	1	1	1	1	2	1	1	1	1	1	1	1	1	15.7	15.7	15.7	15.046	140	140	0	16.511	15.7	10	10
P35221	P35221	4	4	4	Catenin alpha-1	CTNNA1		1	4	4	4	2	0	0	0	1	0	2	0	0	2	0	0	0	1	0	2	0	0	2	0	0	0	1	0	2	0	0	6.4	6.4	6.4	100.07	906	906	0	7.182	2.6	0	0
P35237	P35237	14	14	13	Serpin B6	SERPINB6		1	14	14	13	6	3	3	4	4	2	5	8	5	6	3	3	4	4	2	5	8	5	5	3	3	3	4	2	5	7	4	41	41	38.8	42.621	376	376	0	72.926	18.4	10.6	9.8
P35241	P35241	20	4	4	Radixin	RDX		1	20	4	4	15	12	11	10	11	9	10	11	8	3	2	1	2	2	1	2	2	2	3	2	1	2	2	1	2	2	2	24.4	8.1	8.1	68.563	583	583	0	17.491	20.2	13.9	12.3
P35268;Q6P5R6	P35268	3;1	3;1	3;1	60S ribosomal protein L22	RPL22		2	3	3	3	1	2	2	0	1	1	1	1	0	1	2	2	0	1	1	1	1	0	1	2	2	0	1	1	1	1	0	26.6	26.6	26.6	14.787	128	128;122	0	5.9048	10.2	16.4	16.4
P35318	P35318	3	3	3	ADM;Adrenomedullin;Proadrenomedullin N-20 terminal peptide	ADM		1	3	3	3	3	0	0	0	0	0	0	0	0	3	0	0	0	0	0	0	0	0	3	0	0	0	0	0	0	0	0	20.5	20.5	20.5	20.42	185	185	0	6.3835	20.5	0	0
P35442	P35442	48	45	45	Thrombospondin-2	THBS2		1	48	45	45	33	29	27	29	28	32	36	28	33	30	26	24	26	26	29	33	26	30	30	26	24	26	26	29	33	26	30	39.2	36.9	36.9	129.99	1172	1172	0	323.31	28.4	25.1	27.6
P35443	P35443	5	2	2	Thrombospondin-4	THBS4		1	5	2	2	3	1	1	3	3	2	3	1	1	1	0	0	1	1	0	0	0	0	1	0	0	1	1	0	0	0	0	5.9	2.2	2.2	105.87	961	961	0.00076046	3.6559	3.1	1	1
P35520	P35520	2	2	2	Cystathionine beta-synthase	CBS		1	2	2	2	0	0	0	0	0	0	1	1	0	0	0	0	0	0	0	1	1	0	0	0	0	0	0	0	1	1	0	2.7	2.7	2.7	60.586	551	551	0.00075873	3.6243	0	0	0
P35555	P35555	119	119	115	Fibrillin-1	FBN1		1	119	119	115	100	34	42	82	45	50	82	40	45	100	34	42	82	45	50	82	40	45	96	31	38	79	42	47	79	37	42	42.5	42.5	41.5	312.24	2871	2871	0	323.31	36.4	13.1	14.7
P35556	P35556	52	48	47	Fibrillin-2	FBN2		1	52	48	47	47	6	4	29	7	6	33	5	6	43	3	0	26	4	3	30	2	3	42	3	0	26	4	3	29	2	3	20.8	19.8	19.3	314.77	2912	2912	0	323.31	18.6	2.1	1
P35579;P35580;P35749;REV__Q9UKV3	P35579	81;7;5;1	81;7;5;1	78;5;2;1	Myosin-9	MYH9		4	81	81	78	42	36	23	33	36	33	38	45	29	42	36	23	33	36	33	38	45	29	40	34	21	31	34	31	36	42	27	37.9	37.9	36.8	226.53	1960	1960;1976;1972;1341	0	323.31	23.1	20.4	12.2
P35590	P35590	5	5	5	Tyrosine-protein kinase receptor Tie-1	TIE1		1	5	5	5	0	0	1	0	1	3	0	0	4	0	0	1	0	1	3	0	0	4	0	0	1	0	1	3	0	0	4	5.3	5.3	5.3	125.09	1138	1138	0	12.792	0	0	1
P35606	P35606	8	8	8	Coatomer subunit beta	COPB2		1	8	8	8	2	1	2	0	4	3	3	4	2	2	1	2	0	4	3	3	4	2	2	1	2	0	4	3	3	4	2	7.8	7.8	7.8	102.49	906	906	0	15.496	2.2	1.1	2.2
P35613	P35613	3	3	3	Basigin	BSG		1	3	3	3	3	1	1	2	1	2	1	2	2	3	1	1	2	1	2	1	2	2	3	1	1	2	1	2	1	2	2	11.4	11.4	11.4	42.2	385	385	0	13.094	11.4	3.6	3.6
P35625	P35625	9	9	9	Metalloproteinase inhibitor 3	TIMP3		1	9	9	9	4	6	2	4	5	6	5	3	3	4	6	2	4	5	6	5	3	3	4	6	2	4	5	6	5	3	3	36	36	36	24.145	211	211	0	23.911	17.5	25.1	7.6
P35637	P35637	2	2	1	RNA-binding protein FUS	FUS		1	2	2	1	0	1	0	0	1	1	1	1	0	0	1	0	0	1	1	1	1	0	0	1	0	0	0	1	0	0	0	3.2	3.2	3.2	53.425	526	526	0	6.1302	0	3.2	0
P35754	P35754	1	1	1	Glutaredoxin-1	GLRX		1	1	1	1	0	0	0	0	1	0	0	1	1	0	0	0	0	1	0	0	1	1	0	0	0	0	1	0	0	1	1	11.3	11.3	11.3	11.776	106	106	0	3.9933	0	0	0
P35998	P35998	7	7	7	26S protease regulatory subunit 7	PSMC2		1	7	7	7	2	2	1	0	3	1	3	4	4	2	2	1	0	3	1	3	4	4	2	2	1	0	3	1	3	4	4	18.9	18.9	18.9	48.633	433	433	0	25.632	5.3	5.8	2.5
P36578	P36578	12	12	12	60S ribosomal protein L4	RPL4		1	12	12	12	6	3	5	3	4	3	7	6	4	6	3	5	3	4	3	7	6	4	6	3	5	3	4	3	7	6	4	29	29	29	47.697	427	427	0	38.487	16.4	7.7	13.3
P36871	P36871	3	3	3	Phosphoglucomutase-1	PGM1		1	3	3	3	0	1	0	0	1	0	1	0	0	0	1	0	0	1	0	1	0	0	0	1	0	0	1	0	1	0	0	5.2	5.2	5.2	61.448	562	562	0	4.9889	0	1.6	0
P36896	P36896	1	1	1	Activin receptor type-1B	ACVR1B		1	1	1	1	0	0	0	0	1	1	0	0	0	0	0	0	0	1	1	0	0	0	0	0	0	0	1	1	0	0	0	3.8	3.8	3.8	56.806	505	505	0.0034795	2.582	0	0	0
P36955	P36955	16	16	10	Pigment epithelium-derived factor	SERPINF1		1	16	16	10	15	3	3	10	5	4	12	6	7	15	3	3	10	5	4	12	6	7	10	1	1	5	2	1	6	1	2	33.5	33.5	22	46.312	418	418	0	127.6	33	8.4	8.6
P37802;Q9UI15	P37802	9;1	9;1	9;1	Transgelin-2	TAGLN2		2	9	9	9	8	6	2	3	4	2	5	4	4	8	6	2	3	4	2	5	4	4	8	6	2	3	4	2	5	4	4	50.8	50.8	50.8	22.391	199	199;199	0	32.797	42.2	38.7	13.6
P37837	P37837	14	14	14	Transaldolase	TALDO1		1	14	14	14	6	6	5	5	6	6	6	10	4	6	6	5	5	6	6	6	10	4	6	6	5	5	6	6	6	10	4	35.6	35.6	35.6	37.54	337	337	0	40.525	18.1	17.5	15.4
P38159;O75526;Q96E39;Q8N7X1	P38159;O75526	5;3;2;2	5;3;2;2	5;3;2;2	RNA-binding motif protein, X chromosome;RNA-binding motif protein, X chromosome, N-terminally processed;RNA-binding motif protein, X-linked-like-2	RBMX;RBMXL2	;	4	5	5	5	3	2	1	0	2	1	1	2	1	3	2	1	0	2	1	1	2	1	3	2	1	0	2	1	1	2	1	12.3	12.3	12.3	42.331	391	391;392;390;1067	0	12.55	8.2	6.1	4.1
P38606	P38606	7	7	7	V-type proton ATPase catalytic subunit A	ATP6V1A		1	7	7	7	2	1	0	0	2	0	2	2	1	2	1	0	0	2	0	2	2	1	2	1	0	0	2	0	2	2	1	11.2	11.2	11.2	68.303	617	617	0	16.128	3.6	1.5	0
P39019	P39019	7	7	7	40S ribosomal protein S19	RPS19		1	7	7	7	2	3	4	2	6	2	1	5	5	2	3	4	2	6	2	1	5	5	2	3	4	2	6	2	1	5	5	42.1	42.1	42.1	16.06	145	145	0	15.668	14.5	20	23.4
P39023;Q92901	P39023	6;1	6;1	6;1	60S ribosomal protein L3	RPL3		2	6	6	6	4	2	4	3	4	2	5	4	4	4	2	4	3	4	2	5	4	4	4	2	4	3	4	2	5	4	4	13.6	13.6	13.6	46.108	403	403;407	0	32.097	9.9	4.7	8.9
P39059	P39059	8	8	8	Collagen alpha-1(XV) chain;Restin;Restin-2;Restin-3;Restin-4	COL15A1		1	8	8	8	6	0	0	7	0	0	6	0	0	6	0	0	7	0	0	6	0	0	6	0	0	7	0	0	6	0	0	6.6	6.6	6.6	141.72	1388	1388	0	41.752	5.3	0	0
P39060	P39060	19	19	19	Collagen alpha-1(XVIII) chain;Endostatin	COL18A1		1	19	19	19	17	7	9	15	10	10	15	7	11	17	7	9	15	10	10	15	7	11	17	7	9	15	10	10	15	7	11	10.1	10.1	10.1	178.19	1754	1754	0	168.09	9.6	4.7	6.6
P39687;O95626;O43423	P39687	5;2;1	5;2;1	3;2;1	Acidic leucine-rich nuclear phosphoprotein 32 family member A	ANP32A		3	5	5	3	0	1	1	0	3	1	3	2	2	0	1	1	0	3	1	3	2	2	0	0	0	0	1	0	2	1	1	15.3	15.3	6	28.585	249	249;131;234	0	11.673	0	2.8	2.8
P39900	P39900	3	3	3	Macrophage metalloelastase	MMP12		1	3	3	3	0	0	0	0	0	0	0	3	0	0	0	0	0	0	0	0	3	0	0	0	0	0	0	0	0	3	0	7.9	7.9	7.9	54.001	470	470	0	6.3471	0	0	0
P40121	P40121	3	3	3	Macrophage-capping protein	CAPG		1	3	3	3	0	1	1	0	1	0	3	0	0	0	1	1	0	1	0	3	0	0	0	1	1	0	1	0	3	0	0	7.2	7.2	7.2	38.498	348	348	0	4.9423	0	2.6	2.6
P40189	P40189	6	6	6	Interleukin-6 receptor subunit beta	IL6ST		1	6	6	6	4	0	0	3	2	2	3	2	2	4	0	0	3	2	2	3	2	2	4	0	0	3	2	2	3	2	2	6.5	6.5	6.5	103.54	918	918	0	15.232	4	0	0
P40227;Q92526	P40227	14;4	14;4	14;4	T-complex protein 1 subunit zeta	CCT6A		2	14	14	14	6	8	6	2	5	4	5	9	4	6	8	6	2	5	4	5	9	4	6	8	6	2	5	4	5	9	4	26.4	26.4	26.4	58.024	531	531;530	0	56.208	12.6	13.6	13
P40429	P40429	3	3	3	60S ribosomal protein L13a	RPL13A		1	3	3	3	1	2	2	2	2	2	3	2	2	1	2	2	2	2	2	3	2	2	1	2	2	2	2	2	3	2	2	12.8	12.8	12.8	23.577	203	203	0	4.8862	3.9	7.4	7.4
P40925	P40925	9	9	9	Malate dehydrogenase, cytoplasmic	MDH1		1	9	9	9	5	8	5	4	6	5	6	9	3	5	8	5	4	6	5	6	9	3	5	8	5	4	6	5	6	9	3	34.1	34.1	34.1	36.426	334	334	0	87.783	21.6	31.4	16.8
P40926	P40926	10	10	10	Malate dehydrogenase, mitochondrial	MDH2		1	10	10	10	4	2	2	5	5	3	7	4	3	4	2	2	5	5	3	7	4	3	4	2	2	5	5	3	7	4	3	35.2	35.2	35.2	35.503	338	338	0	27.599	16.3	9.8	5.9
P41091;Q2VIR3	P41091;Q2VIR3	5;4	5;4	5;4	Eukaryotic translation initiation factor 2 subunit 3;Putative eukaryotic translation initiation factor 2 subunit 3-like protein	EIF2S3;EIF2S3L	;	2	5	5	5	2	2	0	1	1	2	2	4	1	2	2	0	1	1	2	2	4	1	2	2	0	1	1	2	2	4	1	13.3	13.3	13.3	51.109	472	472;472	0	31.566	5.1	6.4	0
P41221;O00755	P41221	10;1	10;1	8;1	Protein Wnt-5a	WNT5A		2	10	10	8	5	3	3	5	3	4	4	6	4	5	3	3	5	3	4	4	6	4	3	2	2	5	2	4	4	5	3	24.5	24.5	18.9	42.339	380	380;349	0	44.38	13.9	8.7	7.6
P41250	P41250	11	11	11	Glycine--tRNA ligase	GARS		1	11	11	11	3	0	3	0	5	1	7	5	4	3	0	3	0	5	1	7	5	4	3	0	3	0	5	1	7	5	4	17.9	17.9	17.9	83.165	739	739	0	35.317	3.8	0	3.5
P41252	P41252	4	4	4	Isoleucine--tRNA ligase, cytoplasmic	IARS		1	4	4	4	1	1	1	0	1	0	2	2	1	1	1	1	0	1	0	2	2	1	1	1	1	0	1	0	2	2	1	3.6	3.6	3.6	144.5	1262	1262	0	7.2036	0.7	0.8	0.8
P41271	P41271	3	3	3	Neuroblastoma suppressor of tumorigenicity 1	NBL1		1	3	3	3	3	2	2	3	2	2	3	2	2	3	2	2	3	2	2	3	2	2	3	2	2	3	2	2	3	2	2	13.8	13.8	13.8	19.408	181	181	0	5.5991	13.8	9.9	9.9
P41567;O60739	P41567;O60739	1;1	1;1	1;1	Eukaryotic translation initiation factor 1;Eukaryotic translation initiation factor 1b	EIF1;EIF1B	;	2	1	1	1	1	1	1	1	1	0	1	1	1	1	1	1	1	1	0	1	1	1	1	1	1	1	1	0	1	1	1	12.4	12.4	12.4	12.732	113	113;113	0	7.0213	12.4	12.4	12.4
P42224	P42224	2	2	2	Signal transducer and activator of transcription 1-alpha/beta	STAT1		1	2	2	2	0	1	0	0	0	0	0	1	0	0	1	0	0	0	0	0	1	0	0	1	0	0	0	0	0	1	0	2.3	2.3	2.3	87.334	750	750	0.0047361	2.3335	0	1.1	0
P42229	P42229	1	1	1	Signal transducer and activator of transcription 5A	STAT5A		1	1	1	1	0	0	0	0	1	0	0	0	0	0	0	0	0	1	0	0	0	0	0	0	0	0	1	0	0	0	0	2	2	2	90.646	794	794	1	-2	0	0	0
P42574	P42574	3	3	3	Caspase-3;Caspase-3 subunit p17;Caspase-3 subunit p12	CASP3		1	3	3	3	3	1	0	1	1	1	1	2	2	3	1	0	1	1	1	1	2	2	3	1	0	1	1	1	1	2	2	10.5	10.5	10.5	31.608	277	277	0	5.3341	10.5	2.9	0
P42677;Q71UM5	P42677;Q71UM5	3;2	3;2	3;2	40S ribosomal protein S27;40S ribosomal protein S27-like	RPS27;RPS27L	;	2	3	3	3	1	2	1	0	1	1	0	1	1	1	2	1	0	1	1	0	1	1	1	2	1	0	1	1	0	1	1	40.5	40.5	40.5	9.461	84	84;84	0	6.8966	15.5	25	11.9
P42766	P42766	1	1	1	60S ribosomal protein L35	RPL35		1	1	1	1	0	1	0	0	0	0	0	0	0	0	1	0	0	0	0	0	0	0	0	1	0	0	0	0	0	0	0	8.1	8.1	8.1	14.551	123	123	0.0092166	2.1257	0	8.1	0
P42785	P42785	5	5	5	Lysosomal Pro-X carboxypeptidase	PRCP		1	5	5	5	3	2	1	3	4	1	4	1	2	3	2	1	3	4	1	4	1	2	3	2	1	3	4	1	4	1	2	9.3	9.3	9.3	55.799	496	496	0	16.578	6.5	4.8	2.8
P42830	P42830	6	6	6	C-X-C motif chemokine 5;ENA-78(8-78);ENA-78(9-78)	CXCL5		1	6	6	6	0	2	1	0	2	1	0	4	0	0	2	1	0	2	1	0	4	0	0	2	1	0	2	1	0	4	0	50	50	50	11.972	114	114	0	10.7	0	11.4	7.9
P42892	P42892	5	5	5	Endothelin-converting enzyme 1	ECE1		1	5	5	5	5	0	1	2	1	2	3	1	3	5	0	1	2	1	2	3	1	3	5	0	1	2	1	2	3	1	3	7.8	7.8	7.8	87.163	770	770	0	12.271	7.8	0	2.1
P43034	P43034	9	9	9	Platelet-activating factor acetylhydrolase IB subunit alpha	PAFAH1B1		1	9	9	9	5	1	1	1	3	1	3	7	1	5	1	1	1	3	1	3	7	1	5	1	1	1	3	1	3	7	1	22.4	22.4	22.4	46.637	410	410	0	29.098	14.4	3.7	3.7
P43235;O60911	P43235	11;2	10;1	10;1	Cathepsin K	CTSK		2	11	10	10	2	7	5	2	4	5	3	6	7	2	6	4	2	3	4	3	5	6	2	6	4	2	3	4	3	5	6	33.4	33.4	33.4	36.966	329	329;334	0	87.645	6.7	20.7	11.6
P43251	P43251	3	3	3	Biotinidase	BTD		1	3	3	3	2	0	0	2	1	1	1	1	2	2	0	0	2	1	1	1	1	2	2	0	0	2	1	1	1	1	2	4.6	4.6	4.6	61.132	543	543	0	16.747	2.8	0	0
P43487	P43487	4	4	4	Ran-specific GTPase-activating protein	RANBP1		1	4	4	4	2	2	2	1	2	1	1	3	0	2	2	2	1	2	1	1	3	0	2	2	2	1	2	1	1	3	0	27.9	27.9	27.9	23.31	201	201	0	29.457	15.9	15.9	10
P43490	P43490	16	16	16	Nicotinamide phosphoribosyltransferase	NAMPT		1	16	16	16	5	4	3	1	9	8	5	11	7	5	4	3	1	9	8	5	11	7	5	4	3	1	9	8	5	11	7	29.3	29.3	29.3	55.52	491	491	0	55.779	10	9.2	7.5
P43686	P43686	6	6	6	26S protease regulatory subunit 6B	PSMC4		1	6	6	6	1	2	2	1	2	1	2	3	3	1	2	2	1	2	1	2	3	3	1	2	2	1	2	1	2	3	3	19.1	19.1	19.1	47.366	418	418	0	18.38	2.4	5.7	6.7
P45877	P45877	2	2	2	Peptidyl-prolyl cis-trans isomerase C	PPIC		1	2	2	2	2	2	2	2	2	2	2	2	2	2	2	2	2	2	2	2	2	2	2	2	2	2	2	2	2	2	2	9.9	9.9	9.9	22.763	212	212	0	6.001	9.9	9.9	9.9
P45974;Q92995	P45974	7;1	7;1	7;1	Ubiquitin carboxyl-terminal hydrolase 5	USP5		2	7	7	7	2	2	1	1	2	1	5	4	3	2	2	1	1	2	1	5	4	3	2	2	1	1	2	1	5	4	3	8.7	8.7	8.7	95.785	858	858;863	0	17.627	1.7	2.1	0.8
P46060	P46060	2	2	2	Ran GTPase-activating protein 1	RANGAP1		1	2	2	2	0	0	1	1	1	0	2	1	1	0	0	1	1	1	0	2	1	1	0	0	1	1	1	0	2	1	1	4.6	4.6	4.6	63.541	587	587	0	6.6312	0	0	2
P46108	P46108	2	2	2	Adapter molecule crk	CRK		1	2	2	2	0	0	0	0	0	0	0	2	0	0	0	0	0	0	0	0	2	0	0	0	0	0	0	0	0	2	0	11.2	11.2	11.2	33.83	304	304	0.0022157	3.3089	0	0	0
P46459	P46459	2	2	2	Vesicle-fusing ATPase	NSF		1	2	2	2	0	1	1	0	2	1	1	2	1	0	1	1	0	2	1	1	2	1	0	1	1	0	2	1	1	2	1	2	2	2	82.593	744	744	0.00075472	3.5772	0	0.9	0.9
P46776	P46776	5	5	5	60S ribosomal protein L27a	RPL27A		1	5	5	5	0	2	4	2	5	1	3	4	2	0	2	4	2	5	1	3	4	2	0	2	4	2	5	1	3	4	2	35.8	35.8	35.8	16.561	148	148	0	14.999	0	12.2	30.4
P46777	P46777	12	12	12	60S ribosomal protein L5	RPL5		1	12	12	12	6	5	4	3	5	5	7	6	5	6	5	4	3	5	5	7	6	5	6	5	4	3	5	5	7	6	5	39.4	39.4	39.4	34.362	297	297	0	38.134	25.9	18.2	18.2
P46778	P46778	3	3	3	60S ribosomal protein L21	RPL21		1	3	3	3	1	2	1	0	1	0	0	0	1	1	2	1	0	1	0	0	0	1	1	2	1	0	1	0	0	0	1	21.2	21.2	21.2	18.565	160	160	0	8.8688	6.9	14.4	5
P46779	P46779	7	7	7	60S ribosomal protein L28	RPL28		1	7	7	7	3	2	1	0	4	1	0	1	1	3	2	1	0	4	1	0	1	1	3	2	1	0	4	1	0	1	1	39.4	39.4	39.4	15.747	137	137	0	9.2847	20.4	13.1	5.8
P46781	P46781	14	14	14	40S ribosomal protein S9	RPS9		1	14	14	14	2	5	9	2	7	7	6	9	8	2	5	9	2	7	7	6	9	8	2	5	9	2	7	7	6	9	8	45.9	45.9	45.9	22.591	194	194	0	29.34	9.3	19.6	28.9
P46782	P46782	4	4	4	40S ribosomal protein S5;40S ribosomal protein S5, N-terminally processed	RPS5		1	4	4	4	1	0	0	0	1	1	2	3	1	1	0	0	0	1	1	2	3	1	1	0	0	0	1	1	2	3	1	19.1	19.1	19.1	22.876	204	204	0	9.2845	3.9	0	0
P46783;Q9NQ39	P46783;Q9NQ39	3;2	3;2	3;2	40S ribosomal protein S10;Putative 40S ribosomal protein S10-like	RPS10;RPS10P5	;	2	3	3	3	0	0	0	0	2	0	1	3	1	0	0	0	0	2	0	1	3	1	0	0	0	0	2	0	1	3	1	23	23	23	18.898	165	165;176	0	8.0126	0	0	0
P46821	P46821	18	18	17	Microtubule-associated protein 1B;MAP1B heavy chain;MAP1 light chain LC1	MAP1B		1	18	18	17	3	8	4	0	10	3	3	11	5	3	8	4	0	10	3	3	11	5	2	7	3	0	9	2	2	10	4	9.9	9.9	9.5	270.63	2468	2468	0	66.649	1.3	3.8	1.8
P46926;Q8TDQ7	P46926;Q8TDQ7	4;3	4;3	4;3	Glucosamine-6-phosphate isomerase 1;Glucosamine-6-phosphate isomerase 2	GNPDA1;GNPDA2	;	2	4	4	4	1	0	0	0	0	0	1	4	0	1	0	0	0	0	0	1	4	0	1	0	0	0	0	0	1	4	0	14.5	14.5	14.5	32.668	289	289;276	0	15.158	4.2	0	0
P46940;Q13576	P46940	32;1	32;1	30;0	Ras GTPase-activating-like protein IQGAP1	IQGAP1		2	32	32	30	5	13	11	7	13	11	8	21	12	5	13	11	7	13	11	8	21	12	5	13	11	7	13	11	8	19	12	20.8	20.8	19.8	189.25	1657	1657;1575	0	112.43	3	8.8	7.2
P46976	P46976	3	3	3	Glycogenin-1	GYG1		1	3	3	3	0	1	1	1	2	1	1	2	2	0	1	1	1	2	1	1	2	2	0	1	1	1	2	1	1	2	2	8	8	8	39.383	350	350	0	6.5188	0	2.9	2.9
P47224	P47224	1	1	1	Guanine nucleotide exchange factor MSS4	RABIF		1	1	1	1	0	0	0	0	0	0	1	0	0	0	0	0	0	0	0	1	0	0	0	0	0	0	0	0	1	0	0	8.9	8.9	8.9	13.839	123	123	0.0053691	2.2742	0	0	0
P47755	P47755	9	6	6	F-actin-capping protein subunit alpha-2	CAPZA2		1	9	6	6	3	3	2	2	2	3	4	3	4	2	2	1	2	1	3	2	2	3	2	2	1	2	1	3	2	2	3	37.8	29	29	32.949	286	286	0	17.575	12.6	11.5	8.7
P47756	P47756	9	9	9	F-actin-capping protein subunit beta	CAPZB		1	9	9	9	4	3	1	0	2	2	2	4	2	4	3	1	0	2	2	2	4	2	4	3	1	0	2	2	2	4	2	35	35	35	31.35	277	277	0	32.403	17.7	11.9	3.2
P47813;O14602	P47813;O14602	2;2	2;2	2;2	Eukaryotic translation initiation factor 1A, X-chromosomal;Eukaryotic translation initiation factor 1A, Y-chromosomal	EIF1AX;EIF1AY	;	2	2	2	2	1	1	0	0	0	0	0	1	0	1	1	0	0	0	0	0	1	0	1	1	0	0	0	0	0	1	0	18.1	18.1	18.1	16.46	144	144;144	0	3.985	6.9	11.1	0
P48061	P48061	5	5	5	Stromal cell-derived factor 1;SDF-1-beta(3-72);SDF-1-alpha(3-67)	CXCL12		1	5	5	5	5	0	1	4	0	1	4	0	1	5	0	1	4	0	1	4	0	1	5	0	1	4	0	1	4	0	1	46.2	46.2	46.2	10.666	93	93	0	39.772	46.2	0	8.6
P48307	P48307	21	21	21	Tissue factor pathway inhibitor 2	TFPI2		1	21	21	21	5	19	13	2	19	17	1	18	17	5	19	13	2	19	17	1	18	17	5	19	13	2	19	17	1	18	17	54.5	54.5	54.5	26.934	235	235	0	323.31	27.2	54.5	48.1
P48444	P48444	11	11	11	Coatomer subunit delta	ARCN1		1	11	11	11	2	7	4	1	6	3	4	5	2	2	7	4	1	6	3	4	5	2	2	7	4	1	6	3	4	5	2	20.2	20.2	20.2	57.21	511	511	0	52.608	4.5	15.3	8.4
P48507	P48507	3	3	3	Glutamate--cysteine ligase regulatory subunit	GCLM		1	3	3	3	1	0	0	0	1	1	0	2	1	1	0	0	0	1	1	0	2	1	1	0	0	0	1	1	0	2	1	14.2	14.2	14.2	30.727	274	274	0	16.213	5.1	0	0
P48637	P48637	6	6	6	Glutathione synthetase	GSS		1	6	6	6	2	0	1	0	3	2	2	3	1	2	0	1	0	3	2	2	3	1	2	0	1	0	3	2	2	3	1	13.3	13.3	13.3	52.384	474	474	0	18.647	3.2	0	1.7
P48643	P48643	12	12	12	T-complex protein 1 subunit epsilon	CCT5		1	12	12	12	3	7	5	4	6	3	5	8	6	3	7	5	4	6	3	5	8	6	3	7	5	4	6	3	5	8	6	22	22	22	59.67	541	541	0	53.453	6.7	15.3	7.6
P48681	P48681	29	29	29	Nestin	NES		1	29	29	29	9	10	6	10	19	12	12	15	13	9	10	6	10	19	12	12	15	13	9	10	6	10	19	12	12	15	13	22.9	22.9	22.9	177.44	1621	1621	0	260.99	7.3	8	4.6
P48723	P48723	9	9	9	Heat shock 70 kDa protein 13	HSPA13		1	9	9	9	3	6	4	2	4	5	5	6	5	3	6	4	2	4	5	5	6	5	3	6	4	2	4	5	5	6	5	18.5	18.5	18.5	51.927	471	471	0	88.319	8.1	14.6	9.3
P48740	P48740	12	11	11	Mannan-binding lectin serine protease 1;Mannan-binding lectin serine protease 1 heavy chain;Mannan-binding lectin serine protease 1 light chain	MASP1		1	12	11	11	11	2	0	8	0	0	10	2	2	10	2	0	8	0	0	10	2	2	10	2	0	8	0	0	10	2	2	21.6	20.5	20.5	79.246	699	699	0	156.47	19.6	3.9	0
P48745	P48745	7	7	7	Protein NOV homolog	NOV		1	7	7	7	5	0	0	4	0	0	3	0	0	5	0	0	4	0	0	3	0	0	5	0	0	4	0	0	3	0	0	25.8	25.8	25.8	39.162	357	357	0	41.748	19.3	0	0
P49189	P49189	5	5	5	4-trimethylaminobutyraldehyde dehydrogenase	ALDH9A1		1	5	5	5	0	2	2	0	2	1	1	4	0	0	2	2	0	2	1	1	4	0	0	2	2	0	2	1	1	4	0	9.7	9.7	9.7	53.801	494	494	0	19.119	0	3.6	3.6
P49207	P49207	2	2	2	60S ribosomal protein L34	RPL34		1	2	2	2	0	1	0	0	1	2	1	1	0	0	1	0	0	1	2	1	1	0	0	1	0	0	1	2	1	1	0	7.7	7.7	7.7	13.293	117	117	0	5.2249	0	6.8	0
P49257	P49257	6	6	6	Protein ERGIC-53	LMAN1		1	6	6	6	3	1	0	4	3	1	3	5	3	3	1	0	4	3	1	3	5	3	3	1	0	4	3	1	3	5	3	11.8	11.8	11.8	57.548	510	510	0	53.03	5.1	2.7	0
P49321	P49321	2	2	2	Nuclear autoantigenic sperm protein	NASP		1	2	2	2	0	2	1	0	0	1	1	0	0	0	2	1	0	0	1	1	0	0	0	2	1	0	0	1	1	0	0	2.4	2.4	2.4	85.237	788	788	0.0035587	2.8113	0	2.4	0.9
P49327	P49327	10	10	10	Fatty acid synthase;[Acyl-carrier-protein] S-acetyltransferase;[Acyl-carrier-protein] S-malonyltransferase;3-oxoacyl-[acyl-carrier-protein] synthase;3-oxoacyl-[acyl-carrier-protein] reductase;3-hydroxyacyl-[acyl-carrier-protein] dehydratase;Enoyl-[acyl-carrier-protein] reductase;Oleoyl-[acyl-carrier-protein] hydrolase	FASN		1	10	10	10	5	1	1	1	3	0	7	5	1	5	1	1	1	3	0	7	5	1	5	1	1	1	3	0	7	5	1	5.3	5.3	5.3	273.42	2511	2511	0	23.349	2.3	0.4	0.4
P49354	P49354	2	2	2	Protein farnesyltransferase/geranylgeranyltransferase type-1 subunit alpha	FNTA		1	2	2	2	0	1	1	0	0	1	1	2	1	0	1	1	0	0	1	1	2	1	0	1	1	0	0	1	1	2	1	5	5	5	44.408	379	379	0.0022124	3.2951	0	2.4	2.4
P49368	P49368	12	12	12	T-complex protein 1 subunit gamma	CCT3		1	12	12	12	8	10	6	5	8	5	9	8	6	8	10	6	5	8	5	9	8	6	8	10	6	5	8	5	9	8	6	25.9	25.9	25.9	60.533	545	545	0	61.102	18.2	22.8	14.3
P49458	P49458	3	3	3	Signal recognition particle 9 kDa protein	SRP9		1	3	3	3	1	2	1	0	2	2	1	0	0	1	2	1	0	2	2	1	0	0	1	2	1	0	2	2	1	0	0	34.9	34.9	34.9	10.112	86	86	0	13.606	12.8	25.6	22.1
P49588	P49588	7	7	7	Alanine--tRNA ligase, cytoplasmic	AARS		1	7	7	7	1	2	0	1	5	0	3	4	2	1	2	0	1	5	0	3	4	2	1	2	0	1	5	0	3	4	2	7.5	7.5	7.5	106.81	968	968	0	12.75	0.7	2.1	0
P49589	P49589	6	6	6	Cysteine--tRNA ligase, cytoplasmic	CARS		1	6	6	6	1	0	0	1	3	0	0	2	1	1	0	0	1	3	0	0	2	1	1	0	0	1	3	0	0	2	1	9.5	9.5	9.5	85.472	748	748	0	12.608	1.2	0	0
P49591	P49591	4	4	4	Serine--tRNA ligase, cytoplasmic	SARS		1	4	4	4	0	2	0	0	1	0	2	1	0	0	2	0	0	1	0	2	1	0	0	2	0	0	1	0	2	1	0	5.8	5.8	5.8	58.777	514	514	0	9.1896	0	3.9	0
P49720	P49720	3	3	3	Proteasome subunit beta type-3	PSMB3		1	3	3	3	3	2	3	1	3	2	2	1	1	3	2	3	1	3	2	2	1	1	3	2	3	1	3	2	2	1	1	17.6	17.6	17.6	22.949	205	205	0	10.379	17.6	12.7	17.6
P49721	P49721	4	4	4	Proteasome subunit beta type-2	PSMB2		1	4	4	4	1	1	1	2	2	1	2	2	3	1	1	1	2	2	1	2	2	3	1	1	1	2	2	1	2	2	3	18.4	18.4	18.4	22.836	201	201	0	13.313	4	6	6
P49746	P49746	17	16	15	Thrombospondin-3	THBS3		1	17	16	15	11	3	4	11	3	8	12	2	7	10	2	3	10	3	7	11	2	6	10	2	3	10	3	7	10	2	6	19.6	18.8	17.5	104.2	956	956	0	124.19	13	3.1	4.5
P49747	P49747	6	6	2	Cartilage oligomeric matrix protein	COMP		1	6	6	2	4	1	2	5	5	4	4	3	5	4	1	2	5	5	4	4	3	5	0	0	0	1	2	1	0	1	2	10.8	10.8	3.4	82.86	757	757	0	52.373	7.4	1.3	4
P49755	P49755	2	2	2	Transmembrane emp24 domain-containing protein 10	TMED10		1	2	2	2	1	0	0	0	0	0	1	0	0	1	0	0	0	0	0	1	0	0	1	0	0	0	0	0	1	0	0	11.9	11.9	11.9	24.976	219	219	0.0035791	2.8443	4.1	0	0
P49767	P49767	28	28	28	Vascular endothelial growth factor C	VEGFC		1	28	28	28	15	17	13	13	18	15	13	21	18	15	17	13	13	18	15	13	21	18	15	17	13	13	18	15	13	21	18	49.2	49.2	49.2	46.883	419	419	0	323.31	37.5	36.8	32.2
P49770	P49770	2	2	2	Translation initiation factor eIF-2B subunit beta	EIF2B2		1	2	2	2	0	0	0	0	1	0	0	1	0	0	0	0	0	1	0	0	1	0	0	0	0	0	1	0	0	1	0	5.1	5.1	5.1	38.989	351	351	0.0047458	2.3542	0	0	0
P49773	P49773	2	2	2	Histidine triad nucleotide-binding protein 1	HINT1		1	2	2	2	2	2	1	2	1	2	1	2	2	2	2	1	2	1	2	1	2	2	2	2	1	2	1	2	1	2	2	16.7	16.7	16.7	13.802	126	126	0	6.2029	16.7	16.7	5.6
P49788	P49788	3	3	3	Retinoic acid receptor responder protein 1	RARRES1		1	3	3	3	2	1	1	2	1	1	3	1	1	2	1	1	2	1	1	3	1	1	2	1	1	2	1	1	3	1	1	10.5	10.5	10.5	33.285	294	294	0	7.6354	7.5	3.1	3.1
P50281;Q9Y5R2	P50281	15;1	15;1	15;1	Matrix metalloproteinase-14	MMP14		2	15	15	15	3	9	11	2	12	13	3	12	13	3	9	11	2	12	13	3	12	13	3	9	11	2	12	13	3	12	13	24.6	24.6	24.6	65.893	582	582;645	0	161.31	6.5	15.1	17.5
P50395	P50395	16	16	11	Rab GDP dissociation inhibitor beta	GDI2		1	16	16	11	5	5	3	6	7	6	11	8	4	5	5	3	6	7	6	11	8	4	3	4	2	6	6	5	8	6	2	41.1	41.1	32.6	50.663	445	445	0	95.287	14.8	13.9	6.7
P50452;P50453;O75830	P50452	9;1;1	8;1;1	7;0;0	Serpin B8	SERPINB8		3	9	8	7	3	4	2	3	6	1	3	5	4	2	4	2	2	6	1	3	4	3	1	3	1	1	5	1	2	3	2	25.4	23.3	20.6	42.766	374	374;376;405	0	40.216	8.8	13.1	5.1
P50454	P50454	22	22	22	Serpin H1	SERPINH1		1	22	22	22	18	9	6	11	10	6	14	12	8	18	9	6	11	10	6	14	12	8	18	9	6	11	10	6	14	12	8	48.1	48.1	48.1	46.44	418	418	0	295.1	43.5	30.1	22
P50502;Q8IZP2;Q8NFI4	P50502;Q8IZP2;Q8NFI4	7;6;4	7;6;4	7;6;4	Hsc70-interacting protein;Putative protein FAM10A4;Putative protein FAM10A5	ST13;ST13P4;ST13P5	;;	3	7	7	7	1	3	2	0	3	3	2	4	3	1	3	2	0	3	3	2	4	3	1	3	2	0	3	3	2	4	3	21.7	21.7	21.7	41.331	369	369;240;369	0	21.294	4.6	8.7	7.3
P50552	P50552	4	4	4	Vasodilator-stimulated phosphoprotein	VASP		1	4	4	4	0	0	0	0	2	1	2	1	1	0	0	0	0	2	1	2	1	1	0	0	0	0	2	1	2	1	1	11.1	11.1	11.1	39.829	380	380	0	12.124	0	0	0
P50579	P50579	1	1	1	Methionine aminopeptidase 2	METAP2		1	1	1	1	0	1	0	0	0	1	0	0	0	0	1	0	0	0	1	0	0	0	0	1	0	0	0	1	0	0	0	2.1	2.1	2.1	52.891	478	478	0.0098425	2.1051	0	2.1	0
P50897	P50897	1	1	1	Palmitoyl-protein thioesterase 1	PPT1		1	1	1	1	1	0	0	0	1	1	0	1	1	1	0	0	0	1	1	0	1	1	1	0	0	0	1	1	0	1	1	4.6	4.6	4.6	34.193	306	306	0.0047329	2.3254	4.6	0	0
P50914	P50914	6	6	6	60S ribosomal protein L14	RPL14		1	6	6	6	3	4	3	2	4	4	2	1	3	3	4	3	2	4	4	2	1	3	3	4	3	2	4	4	2	1	3	24.7	24.7	24.7	23.432	215	215	0	17.103	13.5	20	16.3
P50990	P50990	12	12	12	T-complex protein 1 subunit theta	CCT8		1	12	12	12	3	9	7	3	7	7	6	6	6	3	9	7	3	7	7	6	6	6	3	9	7	3	7	7	6	6	6	21.2	21.2	21.2	59.62	548	548	0	45.916	6.4	18.8	15.1
P50991	P50991	12	12	12	T-complex protein 1 subunit delta	CCT4		1	12	12	12	4	3	2	2	4	6	6	8	3	4	3	2	2	4	6	6	8	3	4	3	2	2	4	6	6	8	3	22.6	22.6	22.6	57.924	539	539	0	39.245	9.5	5.4	3
P51114;P51116	P51114;P51116	2;1	2;1	2;1	Fragile X mental retardation syndrome-related protein 1;Fragile X mental retardation syndrome-related protein 2	FXR1;FXR2	;	2	2	2	2	0	0	0	0	0	0	1	1	0	0	0	0	0	0	0	1	1	0	0	0	0	0	0	0	1	1	0	2.6	2.6	2.6	69.72	621	621;673	0.00075075	3.5137	0	0	0
P51149	P51149	5	5	5	Ras-related protein Rab-7a	RAB7A		1	5	5	5	0	1	0	2	0	1	1	3	1	0	1	0	2	0	1	1	3	1	0	1	0	2	0	1	1	3	1	27.1	27.1	27.1	23.489	207	207	0	15.236	0	4.8	0
P51452	P51452	1	1	1	Dual specificity protein phosphatase 3	DUSP3		1	1	1	1	0	0	0	0	0	0	0	1	0	0	0	0	0	0	0	0	1	0	0	0	0	0	0	0	0	1	0	7.6	7.6	7.6	20.478	185	185	0.009849	2.1058	0	0	0
P51665	P51665	6	6	6	26S proteasome non-ATPase regulatory subunit 7	PSMD7		1	6	6	6	0	0	1	0	1	0	2	3	2	0	0	1	0	1	0	2	3	2	0	0	1	0	1	0	2	3	2	24.7	24.7	24.7	37.025	324	324	0	24.726	0	0	2.8
P51688	P51688	4	4	4	N-sulphoglucosamine sulphohydrolase	SGSH		1	4	4	4	2	2	0	2	0	1	1	2	1	2	2	0	2	0	1	1	2	1	2	2	0	2	0	1	1	2	1	6.8	6.8	6.8	56.695	502	502	0	12.752	2.8	4.8	0
P51858;Q9Y3E1;Q7Z4V5	P51858	5;1;1	5;1;1	4;0;0	Hepatoma-derived growth factor	HDGF		3	5	5	4	0	0	1	0	1	0	0	4	1	0	0	1	0	1	0	0	4	1	0	0	1	0	1	0	0	3	0	22.5	22.5	19.2	26.788	240	240;203;671	0	7.6521	0	0	4.6
P51884	P51884	24	24	19	Lumican	LUM		1	24	24	19	24	8	11	18	8	8	21	8	7	24	8	11	18	8	8	21	8	7	19	7	8	15	6	6	16	6	5	54.1	54.1	45	38.429	338	338	0	323.31	54.1	18	25.4
P52209	P52209	9	9	9	6-phosphogluconate dehydrogenase, decarboxylating	PGD		1	9	9	9	4	3	4	2	6	3	4	5	5	4	3	4	2	6	3	4	5	5	4	3	4	2	6	3	4	5	5	25.9	25.9	25.9	53.139	483	483	0	71.381	11.8	9.7	12.4
P52565	P52565	10	10	10	Rho GDP-dissociation inhibitor 1	ARHGDIA		1	10	10	10	8	6	5	5	7	4	7	5	4	8	6	5	5	7	4	7	5	4	8	6	5	5	7	4	7	5	4	42.2	42.2	42.2	23.207	204	204	0	101.09	31.9	27	23.5
P52823	P52823	35	35	35	Stanniocalcin-1	STC1		1	35	35	35	22	30	29	19	30	27	20	32	28	22	30	29	19	30	27	20	32	28	22	30	29	19	30	27	20	32	28	70.4	70.4	70.4	27.621	247	247	0	323.31	63.6	70.4	70.4
P52848	P52848	2	2	2	Bifunctional heparan sulfate N-deacetylase/N-sulfotransferase 1;Heparan sulfate N-deacetylase 1;Heparan sulfate N-sulfotransferase 1	NDST1		1	2	2	2	0	0	0	0	0	0	2	0	0	0	0	0	0	0	0	2	0	0	0	0	0	0	0	0	2	0	0	2.5	2.5	2.5	100.87	882	882	0	4.0201	0	0	0
P52888	P52888	4	4	4	Thimet oligopeptidase	THOP1		1	4	4	4	0	1	0	0	0	0	2	1	0	0	1	0	0	0	0	2	1	0	0	1	0	0	0	0	2	1	0	5.1	5.1	5.1	78.839	689	689	0	6.6283	0	1.6	0
P52907	P52907	11	11	8	F-actin-capping protein subunit alpha-1	CAPZA1		1	11	11	8	3	5	5	3	6	3	5	7	5	3	5	5	3	6	3	5	7	5	2	4	4	3	5	3	3	6	4	45.5	45.5	36.7	32.922	286	286	0	77.126	14.7	25.2	26.9
P53004	P53004	2	2	2	Biliverdin reductase A	BLVRA		1	2	2	2	0	0	0	0	0	0	1	1	0	0	0	0	0	0	0	1	1	0	0	0	0	0	0	0	1	1	0	8.1	8.1	8.1	33.428	296	296	0	7.7266	0	0	0
P53041	P53041	1	1	1	Serine/threonine-protein phosphatase 5	PPP5C		1	1	1	1	0	0	0	0	0	0	1	0	0	0	0	0	0	0	0	1	0	0	0	0	0	0	0	0	1	0	0	2.6	2.6	2.6	56.878	499	499	0.0053981	2.3152	0	0	0
P53396	P53396	16	16	16	ATP-citrate synthase	ACLY		1	16	16	16	11	4	4	3	6	4	7	7	5	11	4	4	3	6	4	7	7	5	11	4	4	3	6	4	7	7	5	16.7	16.7	16.7	120.84	1101	1101	0	67.573	11.8	4.1	4.2
P53618	P53618	1	1	1	Coatomer subunit beta	COPB1		1	1	1	1	0	0	0	0	1	0	0	0	0	0	0	0	0	1	0	0	0	0	0	0	0	0	1	0	0	0	0	3.1	3.1	3.1	107.14	953	953	0	17.552	0	0	0
P53621	P53621	7	7	7	Coatomer subunit alpha;Xenin;Proxenin	COPA		1	7	7	7	1	1	0	0	3	0	2	1	0	1	1	0	0	3	0	2	1	0	1	1	0	0	3	0	2	1	0	5.1	5.1	5.1	138.34	1224	1224	0	16.191	1.2	0.7	0
P53634	P53634	10	10	10	Dipeptidyl peptidase 1;Dipeptidyl peptidase 1 exclusion domain chain;Dipeptidyl peptidase 1 heavy chain;Dipeptidyl peptidase 1 light chain	CTSC		1	10	10	10	7	3	1	8	2	6	7	3	2	7	3	1	8	2	6	7	3	2	7	3	1	8	2	6	7	3	2	23.3	23.3	23.3	51.853	463	463	0	39.764	21.2	7.1	2.6
P53999	P53999	1	1	1	Activated RNA polymerase II transcriptional coactivator p15	SUB1		1	1	1	1	1	1	0	0	0	1	0	0	1	1	1	0	0	0	1	0	0	1	1	1	0	0	0	1	0	0	1	8.7	8.7	8.7	14.395	127	127	0.0098555	2.1068	8.7	8.7	0
P54136	P54136	5	5	5	Arginine--tRNA ligase, cytoplasmic	RARS		1	5	5	5	0	0	0	0	2	1	1	2	0	0	0	0	0	2	1	1	2	0	0	0	0	0	2	1	1	2	0	8	8	8	75.378	660	660	0	11.334	0	0	0
P54577	P54577	4	4	4	Tyrosine--tRNA ligase, cytoplasmic;Tyrosine--tRNA ligase, cytoplasmic, N-terminally processed	YARS		1	4	4	4	0	1	1	0	3	0	0	1	0	0	1	1	0	3	0	0	1	0	0	1	1	0	3	0	0	1	0	7.6	7.6	7.6	59.143	528	528	0	4.5409	0	1.7	1.7
P54578	P54578	6	6	6	Ubiquitin carboxyl-terminal hydrolase 14	USP14		1	6	6	6	1	3	2	1	4	2	3	3	2	1	3	2	1	4	2	3	3	2	1	3	2	1	4	2	3	3	2	12.3	12.3	12.3	56.068	494	494	0	13.669	1.4	5.7	3.6
P54709	P54709	1	1	1	Sodium/potassium-transporting ATPase subunit beta-3	ATP1B3		1	1	1	1	1	0	1	1	1	1	1	0	0	1	0	1	1	1	1	1	0	0	1	0	1	1	1	1	1	0	0	3.9	3.9	3.9	31.512	279	279	0.0035537	2.8049	3.9	0	3.9
P54725	P54725	2	1	1	UV excision repair protein RAD23 homolog A	RAD23A		1	2	1	1	0	0	0	0	0	2	1	0	0	0	0	0	0	0	1	1	0	0	0	0	0	0	0	1	1	0	0	5.8	3.3	3.3	39.609	363	363	0.002214	3.3002	0	0	0
P54727	P54727	4	4	3	UV excision repair protein RAD23 homolog B	RAD23B		1	4	4	3	3	1	0	0	0	1	0	1	1	3	1	0	0	0	1	0	1	1	3	1	0	0	0	0	0	1	1	9.5	9.5	7.3	43.171	409	409	0	5.8764	7.3	2.2	0
P54764	P54764	2	2	2	Ephrin type-A receptor 4	EPHA4		1	2	2	2	2	1	1	1	2	2	1	2	0	2	1	1	1	2	2	1	2	0	2	1	1	1	2	2	1	2	0	3.4	3.4	3.4	109.86	986	986	0	17.194	3.4	1.3	1.3
P54802	P54802	3	3	3	Alpha-N-acetylglucosaminidase;Alpha-N-acetylglucosaminidase 82 kDa form;Alpha-N-acetylglucosaminidase 77 kDa form	NAGLU		1	3	3	3	2	1	0	1	1	0	1	1	1	2	1	0	1	1	0	1	1	1	2	1	0	1	1	0	1	1	1	5.9	5.9	5.9	82.265	743	743	0	13.089	4.8	2.2	0
P54819	P54819	2	2	2	Adenylate kinase 2, mitochondrial;Adenylate kinase 2, mitochondrial, N-terminally processed	AK2		1	2	2	2	0	0	0	0	0	0	2	0	0	0	0	0	0	0	0	2	0	0	0	0	0	0	0	0	2	0	0	10.5	10.5	10.5	26.477	239	239	0.0036127	2.9595	0	0	0
P54826	P54826	1	1	1	Growth arrest-specific protein 1	GAS1		1	1	1	1	1	0	0	1	0	0	0	0	0	1	0	0	1	0	0	0	0	0	1	0	0	1	0	0	0	0	0	2.6	2.6	2.6	35.693	345	345	0.0047587	2.38	2.6	0	0
P54920	P54920	2	2	2	Alpha-soluble NSF attachment protein	NAPA		1	2	2	2	1	0	0	0	0	0	0	1	0	1	0	0	0	0	0	0	1	0	1	0	0	0	0	0	0	1	0	6.8	6.8	6.8	33.232	295	295	0.005344	2.2032	3.4	0	0
P55001	P55001	7	7	7	Microfibrillar-associated protein 2	MFAP2		1	7	7	7	3	3	3	3	3	3	4	4	5	3	3	3	3	3	3	4	4	5	3	3	3	3	3	3	4	4	5	23.5	23.5	23.5	20.825	183	183	0	42.204	14.2	12	14.2
P55010	P55010	3	3	3	Eukaryotic translation initiation factor 5	EIF5		1	3	3	3	0	1	0	0	1	0	0	2	0	0	1	0	0	1	0	0	2	0	0	1	0	0	1	0	0	2	0	6.5	6.5	6.5	49.222	431	431	0	5.4795	0	2.6	0
P55036	P55036	2	2	2	26S proteasome non-ATPase regulatory subunit 4	PSMD4		1	2	2	2	1	1	0	0	1	1	1	2	1	1	1	0	0	1	1	1	2	1	1	1	0	0	1	1	1	2	1	6.4	6.4	6.4	40.736	377	377	0	7.445	2.7	3.7	0
P55058	P55058	2	2	2	Phospholipid transfer protein	PLTP		1	2	2	2	2	1	1	2	2	1	2	2	2	2	1	1	2	2	1	2	2	2	2	1	1	2	2	1	2	2	2	3.9	3.9	3.9	54.739	493	493	0	5.3364	3.9	1.6	1.6
P55072	P55072	23	23	23	Transitional endoplasmic reticulum ATPase	VCP		1	23	23	23	10	15	12	8	16	12	12	14	10	10	15	12	8	16	12	12	14	10	10	15	12	8	16	12	12	14	10	31.5	31.5	31.5	89.321	806	806	0	170.14	17.6	21.3	17
P55083	P55083	4	4	4	Microfibril-associated glycoprotein 4	MFAP4		1	4	4	4	2	0	0	2	1	0	3	0	0	2	0	0	2	1	0	3	0	0	2	0	0	2	1	0	3	0	0	14.5	14.5	14.5	28.648	255	255	0	7.8841	3.1	0	0
P55089	P55089	1	1	1	Urocortin	UCN		1	1	1	1	0	1	1	0	1	1	0	0	1	0	1	1	0	1	1	0	0	1	0	1	1	0	1	1	0	0	1	7.3	7.3	7.3	13.458	124	124	0.0053836	2.2927	0	7.3	7.3
P55145	P55145	4	4	4	Mesencephalic astrocyte-derived neurotrophic factor	MANF		1	4	4	4	2	0	1	0	2	2	3	2	0	2	0	1	0	2	2	3	2	0	2	0	1	0	2	2	3	2	0	31.9	31.9	31.9	20.7	182	182	0	19.771	18.7	0	9.3
P55209	P55209	6	6	4	Nucleosome assembly protein 1-like 1	NAP1L1		1	6	6	4	1	4	3	1	6	3	2	2	4	1	4	3	1	6	3	2	2	4	1	2	2	1	4	3	1	2	3	14.6	14.6	12	45.374	391	391	0	40.528	4.3	10	10.2
P55263	P55263	4	4	4	Adenosine kinase	ADK		1	4	4	4	0	1	0	0	1	1	1	1	1	0	1	0	0	1	1	1	1	1	0	1	0	0	1	1	1	1	1	13.5	13.5	13.5	40.545	362	362	0	13.197	0	3.9	0
P55268	P55268	55	54	53	Laminin subunit beta-2	LAMB2		1	55	54	53	34	20	27	28	34	30	22	27	31	33	19	27	28	33	30	21	26	30	32	19	27	28	33	30	21	26	30	31.8	31.2	30.6	195.98	1798	1798	0	323.31	23	13.3	17.7
P55283	P55283	2	2	2	Cadherin-4	CDH4		1	2	2	2	0	0	0	2	0	0	0	1	0	0	0	0	2	0	0	0	1	0	0	0	0	2	0	0	0	1	0	2.2	2.2	2.2	100.28	916	916	0.0035765	2.8425	0	0	0
P55287;P55286	P55287	13;1	13;1	12;0	Cadherin-11	CDH11		2	13	13	12	11	3	2	6	3	2	8	0	1	11	3	2	6	3	2	8	0	1	10	3	2	6	3	2	8	0	1	25.4	25.4	25.4	87.964	796	796;799	0	90.102	18.7	4.4	2.8
P55290	P55290	8	8	8	Cadherin-13	CDH13		1	8	8	8	5	4	2	2	3	5	5	5	3	5	4	2	2	3	5	5	5	3	5	4	2	2	3	5	5	5	3	9.8	9.8	9.8	78.286	713	713	0	47.02	6.3	4.2	3.2
P55786;A6NEC2	P55786	9;3	9;3	9;3	Puromycin-sensitive aminopeptidase	NPEPPS		2	9	9	9	0	4	2	1	5	3	3	5	2	0	4	2	1	5	3	3	5	2	0	4	2	1	5	3	3	5	2	12.9	12.9	12.9	103.28	919	919;478	0	31.912	0	5.8	2.4
P55884	P55884	5	5	5	Eukaryotic translation initiation factor 3 subunit B	EIF3B		1	5	5	5	0	2	2	1	2	1	3	0	2	0	2	2	1	2	1	3	0	2	0	2	2	1	2	1	3	0	2	8.1	8.1	8.1	92.48	814	814	0	14.818	0	3.9	3.9
P56537	P56537	3	3	3	Eukaryotic translation initiation factor 6	EIF6		1	3	3	3	0	1	0	0	2	0	3	0	0	0	1	0	0	2	0	3	0	0	0	1	0	0	2	0	3	0	0	17.1	17.1	17.1	26.599	245	245	0	10.71	0	4.1	0
P56730	P56730	1	1	1	Neurotrypsin	PRSS12		1	1	1	1	1	0	0	0	0	0	0	0	0	1	0	0	0	0	0	0	0	0	1	0	0	0	0	0	0	0	0	1.1	1.1	1.1	97.066	875	875	1	-2	1.1	0	0
P58215	P58215	18	18	18	Lysyl oxidase homolog 3	LOXL3		1	18	18	18	14	0	0	9	0	1	11	0	0	14	0	0	9	0	1	11	0	0	14	0	0	9	0	1	11	0	0	27.5	27.5	27.5	83.166	753	753	0	54.854	22.2	0	0
P58335	P58335	1	1	1	Anthrax toxin receptor 2	ANTXR2		1	1	1	1	0	0	0	0	0	0	0	1	0	0	0	0	0	0	0	0	1	0	0	0	0	0	0	0	0	1	0	3.1	3.1	3.1	53.666	489	489	0	4.2187	0	0	0
P58546	P58546	2	2	2	Myotrophin	MTPN		1	2	2	2	2	2	2	1	2	2	2	2	2	2	2	2	1	2	2	2	2	2	2	2	2	1	2	2	2	2	2	30.5	30.5	30.5	12.895	118	118	0	55.783	30.5	30.5	30.5
P59046	P59046	1	1	1	NACHT, LRR and PYD domains-containing protein 12	NLRP12		1	1	1	1	0	0	0	0	0	0	1	0	0	0	0	0	0	0	0	1	0	0	0	0	0	0	0	0	1	0	0	1.6	1.6	1.6	120.17	1061	1061	0.0041351	2.4708	0	0	0
P59510	P59510	1	1	1	A disintegrin and metalloproteinase with thrombospondin motifs 20	ADAMTS20		1	1	1	1	0	1	0	0	0	0	0	0	0	0	1	0	0	0	0	0	0	0	0	1	0	0	0	0	0	0	0	0.6	0.6	0.6	214.72	1910	1910	1	-2	0	0.6	0
P59666;P59665	P59666;P59665	1;1	1;1	1;1	Neutrophil defensin 3;HP 3-56;Neutrophil defensin 2;Neutrophil defensin 1;HP 1-56;Neutrophil defensin 2	DEFA3;DEFA1	;	2	1	1	1	1	0	0	0	0	0	0	0	0	1	0	0	0	0	0	0	0	0	1	0	0	0	0	0	0	0	0	9.6	9.6	9.6	10.245	94	94;94	0.00074963	3.4811	9.6	0	0
P59998	P59998	8	8	8	Actin-related protein 2/3 complex subunit 4	ARPC4		1	8	8	8	6	5	4	4	4	3	7	4	3	6	5	4	4	4	3	7	4	3	6	5	4	4	4	3	7	4	3	50	50	50	19.667	168	168	0	20.444	41.7	24.4	17.9
P60033	P60033	1	1	1	CD81 antigen	CD81		1	1	1	1	1	1	1	1	1	1	0	1	1	1	1	1	1	1	1	0	1	1	1	1	1	1	1	1	0	1	1	9.7	9.7	9.7	25.809	236	236	0	40.212	9.7	9.7	9.7
P60174	P60174	19	19	19	Triosephosphate isomerase	TPI1		1	19	19	19	16	18	13	14	15	14	14	16	15	16	18	13	14	15	14	14	16	15	16	18	13	14	15	14	14	16	15	66.8	66.8	66.8	30.791	286	286	0	289.11	57.3	66.8	52.1
P60660;P14649	P60660	9;2	9;2	9;2	Myosin light polypeptide 6	MYL6		2	9	9	9	6	7	5	3	6	6	4	7	6	6	7	5	3	6	6	4	7	6	6	7	5	3	6	6	4	7	6	51	51	51	16.93	151	151;208	0	58.023	34.4	40.4	33.8
P60709;P63261;Q6S8J3;A5A3E0;P0CG38;P0CG39;Q9BYX7	P60709;P63261	34;33;12;11;9;6;5	34;33;12;11;9;6;5	13;12;3;2;2;2;2	Actin, cytoplasmic 1;Actin, cytoplasmic 1, N-terminally processed;Actin, cytoplasmic 2;Actin, cytoplasmic 2, N-terminally processed	ACTB;ACTG1	;	7	34	34	13	27	25	24	22	21	20	23	24	20	27	25	24	22	21	20	23	24	20	10	9	9	9	8	7	9	8	7	74.4	74.4	44.8	41.736	375	375;375;1075;1075;1075;1038;375	0	323.31	66.1	61.6	59.2
P60842;Q14240;P38919	P60842;Q14240	8;5;2	8;5;2	8;5;2	Eukaryotic initiation factor 4A-I;Eukaryotic initiation factor 4A-II;Eukaryotic initiation factor 4A-II, N-terminally processed	EIF4A1;EIF4A2	;	3	8	8	8	2	5	5	4	5	5	2	6	4	2	5	5	4	5	5	2	6	4	2	5	5	4	5	5	2	6	4	20.4	20.4	20.4	46.153	406	406;407;411	0	36.185	6.9	14.8	16.3
P60866	P60866	4	4	4	40S ribosomal protein S20	RPS20		1	4	4	4	0	2	2	1	2	1	2	4	2	0	2	2	1	2	1	2	4	2	0	2	2	1	2	1	2	4	2	31.9	31.9	31.9	13.373	119	119	0	9.5601	0	16.8	16.8
P60900	P60900	8	8	8	Proteasome subunit alpha type-6	PSMA6		1	8	8	8	5	6	3	2	3	4	4	3	4	5	6	3	2	3	4	4	3	4	5	6	3	2	3	4	4	3	4	35	35	35	27.399	246	246	0	24.468	22.8	25.6	12.6
P60903	P60903	3	3	3	Protein S100-A10	S100A10		1	3	3	3	3	1	2	2	2	2	2	2	2	3	1	2	2	2	2	2	2	2	3	1	2	2	2	2	2	2	2	37.1	37.1	37.1	11.203	97	97	0	12.651	37.1	9.3	19.6
P60981	P60981	8	6	6	Destrin	DSTN		1	8	6	6	7	2	2	4	2	3	2	4	2	5	2	2	4	2	3	2	3	2	5	2	2	4	2	3	2	3	2	46.1	38.8	38.8	18.506	165	165	0	35.982	34.5	13.9	13.9
P60983;O60234	P60983	3;1	3;1	3;1	Glia maturation factor beta	GMFB		2	3	3	3	0	2	1	2	2	2	3	2	2	0	2	1	2	2	2	3	2	2	0	2	1	2	2	2	3	2	2	19	19	19	16.713	142	142;142	0	9.1413	0	14.1	6.3
P61009	P61009	1	1	1	Signal peptidase complex subunit 3	SPCS3		1	1	1	1	0	0	0	0	0	0	0	1	1	0	0	0	0	0	0	0	1	1	0	0	0	0	0	0	0	1	1	6.7	6.7	6.7	20.313	180	180	0.00074405	3.4346	0	0	0
P61088;Q5JXB2	P61088;Q5JXB2	9;5	9;5	9;5	Ubiquitin-conjugating enzyme E2 N;Putative ubiquitin-conjugating enzyme E2 N-like	UBE2N;UBE2NL	;	2	9	9	9	2	1	1	2	4	2	3	5	1	2	1	1	2	4	2	3	5	1	2	1	1	2	4	2	3	5	1	49.3	49.3	49.3	17.138	152	152;153	0	29.02	23.7	5.3	7.2
P61158;Q9P1U1	P61158	11;1	11;1	11;1	Actin-related protein 3	ACTR3		2	11	11	11	5	7	5	6	5	3	6	6	5	5	7	5	6	5	3	6	6	5	5	7	5	6	5	3	6	6	5	24.4	24.4	24.4	47.371	418	418;418	0	98.287	12.4	18.2	12
P61160	P61160	8	8	8	Actin-related protein 2	ACTR2		1	8	8	8	4	2	3	2	3	2	5	2	3	4	2	3	2	3	2	5	2	3	4	2	3	2	3	2	5	2	3	28.4	28.4	28.4	44.76	394	394	0	60.199	17.3	5.1	7.9
P61163;P42025	P61163;P42025	2;2	2;2	2;2	Alpha-centractin;Beta-centractin	ACTR1A;ACTR1B	;	2	2	2	2	1	1	1	0	2	0	1	1	1	1	1	1	0	2	0	1	1	1	1	1	1	0	2	0	1	1	1	5.1	5.1	5.1	42.613	376	376;376	0.00074627	3.4529	2.9	2.1	2.9
P61201	P61201	2	2	2	COP9 signalosome complex subunit 2	COPS2		1	2	2	2	0	1	0	0	0	0	1	1	0	0	1	0	0	0	0	1	1	0	0	1	0	0	0	0	1	1	0	4.5	4.5	4.5	51.596	443	443	0	5.7154	0	2.3	0
P61247	P61247	10	10	10	40S ribosomal protein S3a	RPS3A		1	10	10	10	3	2	5	1	5	3	3	5	5	3	2	5	1	5	3	3	5	5	3	2	5	1	5	3	3	5	5	34.5	34.5	34.5	29.945	264	264	0	27.568	10.2	8.3	15.9
P61254;Q9UNX3	P61254;Q9UNX3	3;2	3;2	3;2	60S ribosomal protein L26;60S ribosomal protein L26-like 1	RPL26;RPL26L1	;	2	3	3	3	0	1	1	1	0	2	1	0	1	0	1	1	1	0	2	1	0	1	0	1	1	1	0	2	1	0	1	17.2	17.2	17.2	17.258	145	145;145	0	5.7692	0	4.8	4.8
P61289	P61289	4	4	4	Proteasome activator complex subunit 3	PSME3		1	4	4	4	1	3	2	0	3	1	2	3	1	1	3	2	0	3	1	2	3	1	1	3	2	0	3	1	2	3	1	18.5	18.5	18.5	29.506	254	254	0	19.471	3.9	14.2	8.3
P61313	P61313	7	7	7	60S ribosomal protein L15	RPL15		1	7	7	7	5	2	3	2	3	1	4	4	2	5	2	3	2	3	1	4	4	2	5	2	3	2	3	1	4	4	2	30.9	30.9	30.9	24.146	204	204	0	25.096	27	12.3	19.1
P61326;Q96A72	P61326;Q96A72	1;1	1;1	1;1	Protein mago nashi homolog;Protein mago nashi homolog 2	MAGOH;MAGOHB	;	2	1	1	1	0	0	1	0	0	0	0	0	0	0	0	1	0	0	0	0	0	0	0	0	1	0	0	0	0	0	0	10.3	10.3	10.3	17.163	146	146;148	0.0040984	2.4068	0	0	10.3
P61353	P61353	5	5	5	60S ribosomal protein L27	RPL27		1	5	5	5	4	5	3	3	3	4	3	2	3	4	5	3	3	3	4	3	2	3	4	5	3	3	3	4	3	2	3	44.9	44.9	44.9	15.798	136	136	0	49.182	38.2	44.9	30.1
P61586;P62745	P61586	4;1	1;0	1;0	Transforming protein RhoA	RHOA		2	4	1	1	3	1	1	3	1	1	2	2	1	1	0	0	0	0	0	0	1	0	1	0	0	0	0	0	0	1	0	24.9	6.2	6.2	21.768	193	193;196	0.0098684	2.1169	17.1	7.8	7.8
P61604	P61604	7	7	7	10 kDa heat shock protein, mitochondrial	HSPE1		1	7	7	7	2	3	1	2	2	1	4	3	2	2	3	1	2	2	1	4	3	2	2	3	1	2	2	1	4	3	2	60.8	60.8	60.8	10.932	102	102	0	33.524	25.5	32.4	11.8
P61758	P61758	2	2	2	Prefoldin subunit 3	VBP1		1	2	2	2	1	1	1	1	1	0	1	1	0	1	1	1	1	1	0	1	1	0	1	1	1	1	1	0	1	1	0	9.6	9.6	9.6	22.658	197	197	0.00076278	3.7182	4.6	5.1	5.1
P61769	P61769	7	7	7	Beta-2-microglobulin;Beta-2-microglobulin form pI 5.3	B2M		1	7	7	7	6	4	5	6	5	5	7	6	6	6	4	5	6	5	5	7	6	6	6	4	5	6	5	5	7	6	6	45.4	45.4	45.4	13.714	119	119	0	263.14	40.3	30.3	37
P61916	P61916	9	9	9	Epididymal secretory protein E1	NPC2		1	9	9	9	7	4	2	8	4	4	9	4	4	7	4	2	8	4	4	9	4	4	7	4	2	8	4	4	9	4	4	43.7	43.7	43.7	16.57	151	151	0	46.007	43.7	31.1	17.9
P61923	P61923	1	1	1	Coatomer subunit zeta-1	COPZ1		1	1	1	1	0	0	1	0	0	1	0	1	1	0	0	1	0	0	1	0	1	1	0	0	1	0	0	1	0	1	1	8.5	8.5	8.5	20.198	177	177	0	7.3035	0	0	8.5
P61925	P61925	1	1	1	cAMP-dependent protein kinase inhibitor alpha	PKIA		1	1	1	1	0	0	0	0	1	0	0	0	0	0	0	0	0	1	0	0	0	0	0	0	0	0	1	0	0	0	0	22.4	22.4	22.4	7.9884	76	76	0.0036284	3.0129	0	0	0
P61960	P61960	2	2	2	Ubiquitin-fold modifier 1	UFM1		1	2	2	2	1	1	0	0	2	0	1	1	1	1	1	0	0	2	0	1	1	1	1	1	0	0	2	0	1	1	1	31.8	31.8	31.8	9.1175	85	85	0	4.8506	17.6	17.6	0
P61970	P61970	3	3	3	Nuclear transport factor 2	NUTF2		1	3	3	3	2	1	0	0	1	1	2	2	2	2	1	0	0	1	1	2	2	2	2	1	0	0	1	1	2	2	2	22.8	22.8	22.8	14.478	127	127	0	6.2896	17.3	5.5	0
P61978	P61978	12	12	12	Heterogeneous nuclear ribonucleoprotein K	HNRNPK		1	12	12	12	5	5	3	0	7	4	2	6	3	5	5	3	0	7	4	2	6	3	5	5	3	0	7	4	2	6	3	31.3	31.3	31.3	50.976	463	463	0	52.724	14.5	15.3	9.1
P61981	P61981	16	11	8	14-3-3 protein gamma;14-3-3 protein gamma, N-terminally processed	YWHAG		1	16	11	8	12	8	7	4	7	4	6	6	4	10	6	6	4	4	3	5	5	4	7	6	5	3	3	3	4	4	3	50.2	37.2	30	28.302	247	247	0	72.342	39.3	32.4	28.3
P62081	P62081	2	2	2	40S ribosomal protein S7	RPS7		1	2	2	2	0	1	0	1	0	0	1	0	0	0	1	0	1	0	0	1	0	0	0	1	0	1	0	0	1	0	0	8.8	8.8	8.8	22.127	194	194	0.0035261	2.7481	0	4.6	0
P62136;P36873	P62136;P36873	6;3	6;3	3;0	Serine/threonine-protein phosphatase PP1-alpha catalytic subunit;Serine/threonine-protein phosphatase PP1-gamma catalytic subunit	PPP1CA;PPP1CC	;	2	6	6	3	0	5	1	1	2	2	1	3	3	0	5	1	1	2	2	1	3	3	0	3	1	1	1	2	1	1	2	21.5	21.5	11.5	37.512	330	330;323	0	15.577	0	19.1	2.7
P62140	P62140	5	2	2	Serine/threonine-protein phosphatase PP1-beta catalytic subunit	PPP1CB		1	5	2	2	0	2	1	0	1	0	1	2	1	0	0	1	0	0	0	1	0	0	0	0	1	0	0	0	1	0	0	16.2	8.6	8.6	37.186	327	327	0	5.1156	0	7.6	3.7
P62158;P27482	P62158	7;2	7;2	7;2	Calmodulin	CALM1		2	7	7	7	6	4	4	4	4	4	5	4	3	6	4	4	4	4	4	5	4	3	6	4	4	4	4	4	5	4	3	39.6	39.6	39.6	16.837	149	149;149	0	53.899	39.6	28.2	30.9
P62191	P62191	2	2	2	26S protease regulatory subunit 4	PSMC1		1	2	2	2	0	2	1	1	1	2	0	1	1	0	2	1	1	1	2	0	1	1	0	2	1	1	1	2	0	1	1	4.8	4.8	4.8	49.184	440	440	0	7.9444	0	4.8	2.7
P62195;Q8NB90	P62195	7;1	7;1	7;1	26S protease regulatory subunit 8	PSMC5		2	7	7	7	0	0	0	0	2	0	0	5	1	0	0	0	0	2	0	0	5	1	0	0	0	0	2	0	0	5	1	19.7	19.7	19.7	45.626	406	406;893	0	12.854	0	0	0
P62241	P62241	13	13	13	40S ribosomal protein S8	RPS8		1	13	13	13	6	8	11	5	9	8	6	4	7	6	8	11	5	9	8	6	4	7	6	8	11	5	9	8	6	4	7	53.4	53.4	53.4	24.205	208	208	0	160.16	34.6	49.5	47.1
P62244	P62244	3	3	3	40S ribosomal protein S15a	RPS15A		1	3	3	3	0	1	2	0	1	1	0	2	1	0	1	2	0	1	1	0	2	1	0	1	2	0	1	1	0	2	1	25.4	25.4	25.4	14.839	130	130	0	9.5108	0	10.8	16.9
P62249	P62249	9	9	9	40S ribosomal protein S16	RPS16		1	9	9	9	5	6	5	2	6	5	5	7	5	5	6	5	2	6	5	5	7	5	5	6	5	2	6	5	5	7	5	41.8	41.8	41.8	16.445	146	146	0	41.676	28.1	34.2	29.5
P62258	P62258	19	16	16	14-3-3 protein epsilon	YWHAE		1	19	16	16	14	10	7	5	11	6	11	10	6	13	8	6	5	9	6	10	9	6	13	8	6	5	9	6	10	9	6	55.3	48.2	48.2	29.174	255	255	0	153.12	47.1	38	25.9
P62263	P62263	2	2	2	40S ribosomal protein S14	RPS14		1	2	2	2	1	1	1	1	1	1	1	2	1	1	1	1	1	1	1	1	2	1	1	1	1	1	1	1	1	2	1	15.2	15.2	15.2	16.273	151	151	0.00075188	3.5217	6.6	6.6	6.6
P62266	P62266	5	5	5	40S ribosomal protein S23	RPS23		1	5	5	5	0	1	4	1	3	2	1	4	4	0	1	4	1	3	2	1	4	4	0	1	4	1	3	2	1	4	4	30.1	30.1	30.1	15.807	143	143	0	10.839	0	7.7	30.1
P62269	P62269	10	10	10	40S ribosomal protein S18	RPS18		1	10	10	10	4	6	6	2	5	5	3	4	5	4	6	6	2	5	5	3	4	5	4	6	6	2	5	5	3	4	5	52.6	52.6	52.6	17.718	152	152	0	36.15	28.3	34.2	35.5
P62277	P62277	5	5	5	40S ribosomal protein S13	RPS13		1	5	5	5	2	3	2	2	1	1	2	4	2	2	3	2	2	1	1	2	4	2	2	3	2	2	1	1	2	4	2	38.4	38.4	38.4	17.222	151	151	0	14.949	16.6	22.5	13.9
P62280	P62280	11	11	11	40S ribosomal protein S11	RPS11		1	11	11	11	2	5	5	2	4	3	4	6	4	2	5	5	2	4	3	4	6	4	2	5	5	2	4	3	4	6	4	53.2	53.2	53.2	18.431	158	158	0	17.937	11.4	24.1	23.4
P62314	P62314	1	1	1	Small nuclear ribonucleoprotein Sm D1	SNRPD1		1	1	1	1	0	0	0	0	1	0	0	1	0	0	0	0	0	1	0	0	1	0	0	0	0	0	1	0	0	1	0	10.9	10.9	10.9	13.281	119	119	0	3.9444	0	0	0
P62316	P62316	2	2	2	Small nuclear ribonucleoprotein Sm D2	SNRPD2		1	2	2	2	0	1	2	0	0	1	2	0	0	0	1	2	0	0	1	2	0	0	0	1	2	0	0	1	2	0	0	14.4	14.4	14.4	13.527	118	118	0	4.2413	0	5.9	14.4
P62318	P62318	1	1	1	Small nuclear ribonucleoprotein Sm D3	SNRPD3		1	1	1	1	1	1	1	0	1	1	1	0	1	1	1	1	0	1	1	1	0	1	1	1	1	0	1	1	1	0	1	7.9	7.9	7.9	13.916	126	126	0	4.4745	7.9	7.9	7.9
P62328	P62328	2	2	2	Thymosin beta-4;Hematopoietic system regulatory peptide	TMSB4X		1	2	2	2	2	0	0	0	1	0	0	1	0	2	0	0	0	1	0	0	1	0	2	0	0	0	1	0	0	1	0	61.4	61.4	61.4	5.0526	44	44	0	7.1524	61.4	0	0
P62333	P62333	4	4	4	26S protease regulatory subunit 10B	PSMC6		1	4	4	4	0	0	1	0	0	1	2	2	0	0	0	1	0	0	1	2	2	0	0	0	1	0	0	1	2	2	0	11.3	11.3	11.3	44.172	389	389	0	9.6461	0	0	2.8
P62424	P62424	10	10	10	60S ribosomal protein L7a	RPL7A		1	10	10	10	2	5	5	1	4	4	2	5	4	2	5	5	1	4	4	2	5	4	2	5	5	1	4	4	2	5	4	34.6	34.6	34.6	29.995	266	266	0	27.656	7.1	21.8	18.4
P62495	P62495	5	5	5	Eukaryotic peptide chain release factor subunit 1	ETF1		1	5	5	5	3	1	2	0	3	1	4	3	1	3	1	2	0	3	1	4	3	1	3	1	2	0	3	1	4	3	1	15.6	15.6	15.6	49.03	437	437	0	17.401	9.8	2.3	8.5
P62633	P62633	2	2	2	Cellular nucleic acid-binding protein	CNBP		1	2	2	2	0	0	1	0	1	1	2	1	0	0	0	1	0	1	1	2	1	0	0	0	1	0	1	1	2	1	0	16.4	16.4	16.4	19.463	177	177	0	6.43	0	0	8.5
P62701;P22090;Q8TD47	P62701;P22090	9;5;4	9;5;4	9;5;4	40S ribosomal protein S4, X isoform;40S ribosomal protein S4, Y isoform 1	RPS4X;RPS4Y1	;	3	9	9	9	2	5	3	2	6	3	3	6	4	2	5	3	2	6	3	3	6	4	2	5	3	2	6	3	3	6	4	28.5	28.5	28.5	29.597	263	263;263;263	0	29.093	7.6	19.8	12.5
P62753	P62753	5	5	5	40S ribosomal protein S6	RPS6		1	5	5	5	2	1	3	1	2	2	2	1	3	2	1	3	1	2	2	2	1	3	2	1	3	1	2	2	2	1	3	13.3	13.3	13.3	28.68	249	249	0	11.615	8.4	4.8	9.6
P62805	P62805	2	2	2	Histone H4	HIST1H4A		1	2	2	2	0	0	0	0	0	1	1	0	0	0	0	0	0	0	1	1	0	0	0	0	0	0	0	1	1	0	0	19.4	19.4	19.4	11.367	103	103	0.0053763	2.2858	0	0	0
P62826	P62826	8	8	8	GTP-binding nuclear protein Ran	RAN		1	8	8	8	2	2	2	1	1	2	4	5	3	2	2	2	1	1	2	4	5	3	2	2	2	1	1	2	4	5	3	39.8	39.8	39.8	24.423	216	216	0	23.339	8.3	8.3	8.3
P62829	P62829	2	2	2	60S ribosomal protein L23	RPL23		1	2	2	2	0	1	1	0	1	1	0	1	0	0	1	1	0	1	1	0	1	0	0	1	1	0	1	1	0	1	0	7.1	7.1	7.1	14.865	140	140	0.00075815	3.6194	0	6.4	6.4
P62834;P61224;A6NIZ1	P62834;P61224;A6NIZ1	2;2;1	2;2;1	2;2;1	Ras-related protein Rap-1A;Ras-related protein Rap-1b;Ras-related protein Rap-1b-like protein	RAP1A;RAP1B	;;	3	2	2	2	1	1	1	2	1	0	1	1	1	1	1	1	2	1	0	1	1	1	1	1	1	2	1	0	1	1	1	12.5	12.5	12.5	20.987	184	184;184;184	0	4.6609	6	6	6
P62841	P62841	1	1	1	40S ribosomal protein S15	RPS15		1	1	1	1	0	1	1	0	0	0	0	1	0	0	1	1	0	0	0	0	1	0	0	1	1	0	0	0	0	1	0	9	9	9	17.04	145	145	0	4.6207	0	9	9
P62851	P62851	4	4	4	40S ribosomal protein S25	RPS25		1	4	4	4	3	3	3	3	3	2	3	3	3	3	3	3	3	3	2	3	3	3	3	3	3	3	3	2	3	3	3	29.6	29.6	29.6	13.742	125	125	0	11.869	22.4	22.4	22.4
P62857	P62857	8	8	8	40S ribosomal protein S28	RPS28		1	8	8	8	5	2	1	2	3	2	2	4	3	5	2	1	2	3	2	2	4	3	5	2	1	2	3	2	2	4	3	72.5	72.5	72.5	7.8409	69	69	0	39.722	44.9	27.5	23.2
P62873;P16520	P62873	7;3	3;0	3;0	Guanine nucleotide-binding protein G(I)/G(S)/G(T) subunit beta-1	GNB1		2	7	3	3	3	3	3	3	3	3	4	5	1	1	2	2	2	3	2	3	3	1	1	2	2	2	3	2	3	3	1	21.8	11.5	11.5	37.377	340	340;340	0	31.117	10	10.3	10.6
P62879;Q9HAV0	P62879;Q9HAV0	8;5	8;5	4;2	Guanine nucleotide-binding protein G(I)/G(S)/G(T) subunit beta-2;Guanine nucleotide-binding protein subunit beta-4	GNB2;GNB4	;	2	8	8	4	2	1	1	2	2	2	3	5	2	2	1	1	2	2	2	3	5	2	0	0	0	1	2	1	2	3	2	27.4	27.4	17.1	37.331	340	340;340	0	22.712	5.9	2.9	2.9
P62888	P62888	4	4	4	60S ribosomal protein L30	RPL30		1	4	4	4	2	2	3	2	2	4	3	3	3	2	2	3	2	2	4	3	3	3	2	2	3	2	2	4	3	3	3	41.7	41.7	41.7	12.784	115	115	0	58.243	24.3	11.3	27.8
P62906	P62906	8	8	8	60S ribosomal protein L10a	RPL10A		1	8	8	8	2	8	4	3	5	4	7	4	5	2	8	4	3	5	4	7	4	5	2	8	4	3	5	4	7	4	5	31.8	31.8	31.8	24.831	217	217	0	80.901	9.7	31.8	23
P62910	P62910	5	5	5	60S ribosomal protein L32	RPL32		1	5	5	5	2	2	3	1	3	2	1	1	2	2	2	3	1	3	2	1	1	2	2	2	3	1	3	2	1	1	2	34.8	34.8	34.8	15.86	135	135	0	11.752	17	17	22.2
P62913	P62913	5	5	5	60S ribosomal protein L11	RPL11		1	5	5	5	0	3	4	0	3	2	2	3	1	0	3	4	0	3	2	2	3	1	0	3	4	0	3	2	2	3	1	24.7	24.7	24.7	20.252	178	178	0	14.796	0	17.4	21.9
P62917	P62917	5	5	5	60S ribosomal protein L8	RPL8		1	5	5	5	2	3	2	1	3	2	3	2	0	2	3	2	1	3	2	3	2	0	2	3	2	1	3	2	3	2	0	17.9	17.9	17.9	28.024	257	257	0	10.854	7	10.5	7.8
P62937;P0DN26;A0A0B4J2A2;A0A075B759;Q9Y536;F5H284;P0DN37	P62937	10;2;2;2;2;2;1	10;2;2;2;2;2;1	10;2;2;2;2;2;1	Peptidyl-prolyl cis-trans isomerase A;Peptidyl-prolyl cis-trans isomerase A, N-terminally processed	PPIA		7	10	10	10	10	9	8	7	6	5	6	9	5	10	9	8	7	6	5	6	9	5	10	9	8	7	6	5	6	9	5	62.4	62.4	62.4	18.012	165	165;164;164;164;164;164;164	0	185.59	62.4	58.2	57
P62942	P62942	7	7	7	Peptidyl-prolyl cis-trans isomerase FKBP1A	FKBP1A		1	7	7	7	6	4	3	1	1	1	1	2	1	6	4	3	1	1	1	1	2	1	6	4	3	1	1	1	1	2	1	59.3	59.3	59.3	11.951	108	108	0	54.669	55.6	44.4	40.7
P62979;P62987;P0CG47;P0CG48	P62979;P62987;P0CG47;P0CG48	4;3;3;3	4;3;3;3	4;3;3;3	Ubiquitin-40S ribosomal protein S27a;Ubiquitin;40S ribosomal protein S27a;Ubiquitin-60S ribosomal protein L40;Ubiquitin;60S ribosomal protein L40;Polyubiquitin-B;Ubiquitin;Polyubiquitin-C;Ubiquitin	RPS27A;UBA52;UBB;UBC	;;;	4	4	4	4	4	4	3	3	3	2	3	3	3	4	4	3	3	3	2	3	3	3	4	4	3	3	3	2	3	3	3	34	34	34	17.965	156	156;128;229;685	0	61.641	34	34	21.8
P62993	P62993	2	2	2	Growth factor receptor-bound protein 2	GRB2		1	2	2	2	0	1	0	0	0	0	0	1	0	0	1	0	0	0	0	0	1	0	0	1	0	0	0	0	0	1	0	8.8	8.8	8.8	25.206	217	217	0.0029091	3.0306	0	5.5	0
P63000;P60763	P63000;P60763	5;3	5;3	2;1	Ras-related C3 botulinum toxin substrate 1;Ras-related C3 botulinum toxin substrate 3	RAC1;RAC3	;	2	5	5	2	2	0	0	1	0	3	3	1	0	2	0	0	1	0	3	3	1	0	1	0	0	0	0	0	1	0	0	27.6	27.6	12	21.45	192	192;192	0	9.8005	12	0	0
P63010	P63010	7	7	5	AP-2 complex subunit beta	AP2B1		1	7	7	5	1	0	0	0	3	0	2	4	1	1	0	0	0	3	0	2	4	1	0	0	0	0	2	0	2	4	1	7.3	7.3	5.2	104.55	937	937	0	13.473	1.2	0	0
P63092;Q5JWF2	P63092;Q5JWF2	2;2	1;1	1;1	Guanine nucleotide-binding protein G(s) subunit alpha isoforms short;Guanine nucleotide-binding protein G(s) subunit alpha isoforms XLas	GNAS	;	2	2	1	1	1	0	1	1	1	1	1	1	1	0	0	0	0	1	1	0	1	1	0	0	0	0	1	1	0	1	1	5.1	2.3	2.3	45.664	394	394;1037	0.0036258	3.0122	2.8	0	2.8
P63096;P08754;P04899;P09471;P11488;P19087;A8MTJ3;P38405	P63096;P08754;P04899;P09471	3;3;3;2;1;1;1;1	3;3;3;2;1;1;1;1	2;2;2;1;0;0;0;0	Guanine nucleotide-binding protein G(i) subunit alpha-1;Guanine nucleotide-binding protein G(k) subunit alpha;Guanine nucleotide-binding protein G(i) subunit alpha-2;Guanine nucleotide-binding protein G(o) subunit alpha	GNAI1;GNAI3;GNAI2;GNAO1	;;;	8	3	3	2	1	0	1	1	0	0	2	0	1	1	0	1	1	0	0	2	0	1	0	0	0	0	0	0	1	0	1	10.2	10.2	7.1	40.361	354	354;354;355;354;350;354;354;381	0	6.1416	3.1	0	3.1
P63104	P63104	22	22	14	14-3-3 protein zeta/delta	YWHAZ		1	22	22	14	15	12	10	9	14	9	12	9	9	15	12	10	9	14	9	12	9	9	10	9	8	9	10	7	10	7	8	60	60	42.9	27.745	245	245	0	226.98	53.1	40	35.9
P63151;Q66LE6;Q00005	P63151;Q66LE6	3;2;1	3;2;1	3;2;1	Serine/threonine-protein phosphatase 2A 55 kDa regulatory subunit B alpha isoform;Serine/threonine-protein phosphatase 2A 55 kDa regulatory subunit B delta isoform	PPP2R2A;PPP2R2D	;	3	3	3	3	0	0	0	0	3	0	0	2	0	0	0	0	0	3	0	0	2	0	0	0	0	0	3	0	0	2	0	8.5	8.5	8.5	51.691	447	447;453;443	0	6.1959	0	0	0
P63162;P14678	P63162;P14678	3;3	3;3	3;3	Small nuclear ribonucleoprotein-associated protein N;Small nuclear ribonucleoprotein-associated proteins B and B	SNRPN;SNRPB	;	2	3	3	3	2	1	1	0	3	1	1	2	2	2	1	1	0	3	1	1	2	2	2	1	1	0	3	1	1	2	2	6.7	6.7	6.7	24.614	240	240;240	0	6.477	6.7	3.8	3.8
P63165	P63165	2	2	2	Small ubiquitin-related modifier 1	SUMO1		1	2	2	2	1	0	0	0	0	0	0	2	1	1	0	0	0	0	0	0	2	1	1	0	0	0	0	0	0	2	1	18.8	18.8	18.8	11.557	101	101	0.0021962	3.1747	6.9	0	0
P63167;Q96FJ2	P63167;Q96FJ2	2;1	2;1	2;1	Dynein light chain 1, cytoplasmic;Dynein light chain 2, cytoplasmic	DYNLL1;DYNLL2	;	2	2	2	2	1	0	1	0	1	0	2	0	1	1	0	1	0	1	0	2	0	1	1	0	1	0	1	0	2	0	1	27	27	27	10.366	89	89;89	0	3.9842	13.5	0	13.5
P63173	P63173	2	2	2	60S ribosomal protein L38	RPL38		1	2	2	2	0	0	0	0	1	2	0	0	0	0	0	0	0	1	2	0	0	0	0	0	0	0	1	2	0	0	0	31.4	31.4	31.4	8.2178	70	70	0	4.0013	0	0	0
P63208	P63208	4	4	4	S-phase kinase-associated protein 1	SKP1		1	4	4	4	1	0	0	0	0	0	2	2	0	1	0	0	0	0	0	2	2	0	1	0	0	0	0	0	2	2	0	19	19	19	18.658	163	163	0	7.9074	5.5	0	0
P63220	P63220	4	4	4	40S ribosomal protein S21	RPS21		1	4	4	4	2	2	1	1	1	1	2	3	1	2	2	1	1	1	1	2	3	1	2	2	1	1	1	1	2	3	1	48.2	48.2	48.2	9.1113	83	83	0	13.937	30.1	27.7	10.8
P63241;Q9GZV4;Q6IS14	P63241;Q9GZV4;Q6IS14	9;8;8	9;8;8	9;8;8	Eukaryotic translation initiation factor 5A-1;Eukaryotic translation initiation factor 5A-2;Eukaryotic translation initiation factor 5A-1-like	EIF5A;EIF5A2;EIF5AL1	;;	3	9	9	9	8	4	2	1	3	2	3	3	2	8	4	2	1	3	2	3	3	2	8	4	2	1	3	2	3	3	2	46.8	46.8	46.8	16.832	154	154;153;154	0	35.047	46.8	24.7	8.4
P63244	P63244	11	11	11	Guanine nucleotide-binding protein subunit beta-2-like 1;Guanine nucleotide-binding protein subunit beta-2-like 1, N-terminally processed	GNB2L1		1	11	11	11	3	6	4	4	5	5	7	7	4	3	6	4	4	5	5	7	7	4	3	6	4	4	5	5	7	7	4	43.8	43.8	43.8	35.076	317	317	0	54.373	13.2	19.6	18.3
P63267;P62736	P63267;P62736	21;21	1;1	1;1	Actin, gamma-enteric smooth muscle;Actin, aortic smooth muscle	ACTG2;ACTA2	;	2	21	1	1	17	16	15	14	13	12	14	16	11	0	0	0	1	0	0	0	0	0	0	0	0	1	0	0	0	0	0	37	2.9	2.9	41.876	376	376;377	0.0041124	2.4378	33.5	33.5	31.1
P63279	P63279	4	4	4	SUMO-conjugating enzyme UBC9	UBE2I		1	4	4	4	0	0	1	0	0	1	1	4	0	0	0	1	0	0	1	1	4	0	0	0	1	0	0	1	1	4	0	17.1	17.1	17.1	18.007	158	158	0	7.0888	0	0	5.7
P63313;CON__P21752	P63313	3;1	3;1	3;1	Thymosin beta-10	TMSB10		2	3	3	3	3	2	2	3	3	3	3	3	3	3	2	2	3	3	3	3	3	3	3	2	2	3	3	3	3	3	3	63.6	63.6	63.6	5.0256	44	44;42	0	78.904	63.6	61.4	61.4
P67775;P62714	P67775;P62714	3;2	3;2	3;2	Serine/threonine-protein phosphatase 2A catalytic subunit alpha isoform;Serine/threonine-protein phosphatase 2A catalytic subunit beta isoform	PPP2CA;PPP2CB	;	2	3	3	3	0	1	0	0	1	0	0	1	2	0	1	0	0	1	0	0	1	2	0	1	0	0	1	0	0	1	2	10	10	10	35.594	309	309;309	0	8.2258	0	3.6	0
P67809;P16989;Q9Y2T7	P67809;P16989	8;4;3	8;4;3	8;4;3	Nuclease-sensitive element-binding protein 1;Y-box-binding protein 3	YBX1;YBX3	;	3	8	8	8	5	3	1	2	3	2	3	5	2	5	3	1	2	3	2	3	5	2	5	3	1	2	3	2	3	5	2	34.9	34.9	34.9	35.924	324	324;372;364	0	33.174	25.9	13.9	2.5
P67936;Q2TAC2	P67936	38;1	38;1	22;1	Tropomyosin alpha-4 chain	TPM4		2	38	38	22	29	20	16	19	17	16	26	25	17	29	20	16	19	17	16	26	25	17	17	11	9	11	9	8	14	15	9	74.6	74.6	48.8	28.521	248	248;916	0	323.31	68.1	52.4	50
P68036	P68036	3	3	3	Ubiquitin-conjugating enzyme E2 L3	UBE2L3		1	3	3	3	1	1	1	1	1	1	3	3	2	1	1	1	1	1	1	3	3	2	1	1	1	1	1	1	3	3	2	27.3	27.3	27.3	17.861	154	154	0	14.587	5.8	5.8	5.8
P68133;P68032	P68133;P68032	21;21	1;1	0;0	Actin, alpha skeletal muscle;Actin, alpha cardiac muscle 1	ACTA1;ACTC1	;	2	21	1	0	18	17	16	14	14	13	15	17	12	1	1	1	1	1	0	1	1	0	0	0	0	0	0	0	0	0	0	36.9	4.2	0	42.051	377	377;377	0	57.853	36.3	36.3	34
P68363;P68366;A6NHL2	P68363;P68366	17;12;1	2;2;0	2;2;0	Tubulin alpha-1B chain;Tubulin alpha-4A chain	TUBA1B;TUBA4A	;	3	17	2	2	7	15	9	9	13	10	11	12	11	2	2	1	1	2	2	1	2	2	2	2	1	1	2	2	1	2	2	41	3.1	3.1	50.151	451	451;448;446	0	10.99	18.6	39.2	25.5
P68371;P04350;Q3ZCM7	P68371;P04350;Q3ZCM7	17;12;9	4;2;1	4;2;1	Tubulin beta-4B chain;Tubulin beta-4A chain;Tubulin beta-8 chain	TUBB4B;TUBB4A;TUBB8	;;	3	17	4	4	12	10	9	4	9	6	7	12	6	3	3	3	1	2	1	2	3	2	3	3	3	1	2	1	2	3	2	36.2	11.2	11.2	49.83	445	445;444;444	0	30.085	31.2	21.8	22.2
P68402	P68402	2	2	2	Platelet-activating factor acetylhydrolase IB subunit beta	PAFAH1B2		1	2	2	2	1	1	1	1	1	1	1	2	1	1	1	1	1	1	1	1	2	1	1	1	1	1	1	1	1	2	1	8.3	8.3	8.3	25.569	229	229	0	5.9442	3.9	3.9	3.9
P78324;Q5TFQ8;O00241;Q9P1W8	P78324;Q5TFQ8	5;4;2;1	5;4;2;1	5;4;2;1	Tyrosine-protein phosphatase non-receptor type substrate 1;Signal-regulatory protein beta-1 isoform 3	SIRPA;SIRPB1	;	4	5	5	5	5	1	1	2	3	4	4	3	3	5	1	1	2	3	4	4	3	3	5	1	1	2	3	4	4	3	3	12.7	12.7	12.7	54.966	504	504;398;398;387	0	21.795	12.7	2.8	2
P78371	P78371	16	16	16	T-complex protein 1 subunit beta	CCT2		1	16	16	16	4	9	5	4	7	1	4	11	5	4	9	5	4	7	1	4	11	5	4	9	5	4	7	1	4	11	5	32.5	32.5	32.5	57.488	535	535	0	59.741	10.1	18.1	13.5
P78417	P78417	13	13	13	Glutathione S-transferase omega-1	GSTO1		1	13	13	13	5	7	5	5	8	7	7	12	8	5	7	5	5	8	7	7	12	8	5	7	5	5	8	7	7	12	8	40.2	40.2	40.2	27.566	241	241	0	82.641	19.9	26.1	21.2
P78536	P78536	5	5	5	Disintegrin and metalloproteinase domain-containing protein 17	ADAM17		1	5	5	5	3	3	2	3	3	4	4	3	3	3	3	2	3	3	4	4	3	3	3	3	2	3	3	4	4	3	3	8.3	8.3	8.3	93.02	824	824	0	45.939	4.5	4.5	2.7
P78539	P78539	25	25	25	Sushi repeat-containing protein SRPX	SRPX		1	25	25	25	9	16	13	7	18	17	8	19	19	9	16	13	7	18	17	8	19	19	9	16	13	7	18	17	8	19	19	37.3	37.3	37.3	51.571	464	464	0	323.31	17.7	25	22.4
P78556	P78556	2	2	2	C-C motif chemokine 20;CCL20(1-67);CCL20(1-64);CCL20(2-70)	CCL20		1	2	2	2	0	1	1	0	1	1	0	2	0	0	1	1	0	1	1	0	2	0	0	1	1	0	1	1	0	2	0	17.7	17.7	17.7	10.762	96	96	0.0034916	2.6334	0	7.3	7.3
P78559	P78559	9	8	8	Microtubule-associated protein 1A;MAP1A heavy chain;MAP1 light chain LC2	MAP1A		1	9	8	8	1	5	2	0	7	2	2	4	1	0	4	1	0	6	1	1	3	0	0	4	1	0	6	1	1	3	0	3.8	3.4	3.4	305.48	2803	2803	0	28.274	0.4	2	0.7
P80303	P80303	23	21	21	Nucleobindin-2;Nesfatin-1	NUCB2		1	23	21	21	15	11	10	14	12	12	13	13	13	13	10	9	12	12	11	11	12	12	13	10	9	12	12	11	11	12	12	46.9	45.2	45.2	50.195	420	420	0	297.15	31.9	25	22.4
P80723	P80723	2	2	2	Brain acid soluble protein 1	BASP1		1	2	2	2	1	0	0	0	1	0	0	0	0	1	0	0	0	1	0	0	0	0	1	0	0	0	1	0	0	0	0	22	22	22	22.693	227	227	0.0053227	2.188	9.3	0	0
P82979	P82979	3	3	3	SAP domain-containing ribonucleoprotein	SARNP		1	3	3	3	0	0	0	0	0	0	2	2	0	0	0	0	0	0	0	2	2	0	0	0	0	0	0	0	2	2	0	13.8	13.8	13.8	23.671	210	210	0	11.033	0	0	0
P83731	P83731	3	3	3	60S ribosomal protein L24	RPL24		1	3	3	3	2	1	1	1	2	1	2	2	1	2	1	1	1	2	1	2	2	1	2	1	1	1	2	1	2	2	1	19.1	19.1	19.1	17.779	157	157	0	9.4828	13.4	5.1	5.1
P84074;P61601;P37235	P84074;P61601;P37235	1;1;1	1;1;1	1;1;1	Neuron-specific calcium-binding protein hippocalcin;Neurocalcin-delta;Hippocalcin-like protein 1	HPCA;NCALD;HPCAL1	;;	3	1	1	1	0	0	0	0	0	0	1	1	0	0	0	0	0	0	0	1	1	0	0	0	0	0	0	0	1	1	0	4.1	4.1	4.1	22.427	193	193;193;193	0	5.1921	0	0	0
P84090	P84090	3	3	3	Enhancer of rudimentary homolog	ERH		1	3	3	3	2	2	2	2	1	2	2	2	1	2	2	2	2	1	2	2	2	1	2	2	2	2	1	2	2	2	1	22.1	22.1	22.1	12.259	104	104	0	15.266	22.1	22.1	22.1
P84098	P84098	4	4	4	60S ribosomal protein L19	RPL19		1	4	4	4	1	1	2	0	0	1	2	0	2	1	1	2	0	0	1	2	0	2	1	1	2	0	0	1	2	0	2	25	25	25	23.466	196	196	0	10.591	9.2	4.1	11.2
P98066	P98066	8	8	8	Tumor necrosis factor-inducible gene 6 protein	TNFAIP6		1	8	8	8	3	6	5	6	7	7	6	7	7	3	6	5	6	7	7	6	7	7	3	6	5	6	7	7	6	7	7	39	39	39	31.203	277	277	0	98.82	13	28.5	23.1
P98095	P98095	25	25	25	Fibulin-2	FBLN2		1	25	25	25	12	11	12	13	15	14	14	15	15	12	11	12	13	15	14	14	15	15	12	11	12	13	15	14	14	15	15	24.2	24.2	24.2	126.57	1184	1184	0	279.85	11.8	10	11.8
P98160	P98160	110	110	110	Basement membrane-specific heparan sulfate proteoglycan core protein;Endorepellin;LG3 peptide	HSPG2		1	110	110	110	88	21	22	64	40	35	67	30	33	88	21	22	64	40	35	67	30	33	88	21	22	64	40	35	67	30	33	31.4	31.4	31.4	468.83	4391	4391	0	323.31	26.1	6.5	6.7
P98179	P98179	3	3	3	RNA-binding protein 3	RBM3		1	3	3	3	3	1	1	0	1	1	1	1	0	3	1	1	0	1	1	1	1	0	3	1	1	0	1	1	1	1	0	27.4	27.4	27.4	17.17	157	157	0	7.4598	27.4	9.6	9.6
P99999;CON__P62894	P99999;CON__P62894	7;4	7;4	7;4	Cytochrome c	CYCS	;	2	7	7	7	4	1	1	1	1	2	4	2	2	4	1	1	1	1	2	4	2	2	4	1	1	1	1	2	4	2	2	41	41	41	11.749	105	105;105	0	16.605	21	7.6	12.4
Q00169;P48739	Q00169;P48739	2;1	2;1	2;1	Phosphatidylinositol transfer protein alpha isoform;Phosphatidylinositol transfer protein beta isoform	PITPNA;PITPNB	;	2	2	2	2	1	1	1	1	0	1	1	0	1	1	1	1	1	0	1	1	0	1	1	1	1	1	0	1	1	0	1	6.3	6.3	6.3	31.806	270	270;271	0	6.4813	3.3	3.3	3
Q00341	Q00341	7	7	7	Vigilin	HDLBP		1	7	7	7	0	3	1	0	3	0	2	4	0	0	3	1	0	3	0	2	4	0	0	3	1	0	3	0	2	4	0	7	7	7	141.45	1268	1268	0	13.962	0	2.9	0.9
Q00577;Q96QR8;Q9UJV8	Q00577;Q96QR8;Q9UJV8	2;1;1	2;1;1	2;1;1	Transcriptional activator protein Pur-alpha;Transcriptional activator protein Pur-beta;Purine-rich element-binding protein gamma	PURA;PURB;PURG	;;	3	2	2	2	0	2	1	1	2	0	0	2	1	0	2	1	1	2	0	0	2	1	0	2	1	1	2	0	0	2	1	5	5	5	34.91	322	322;312;347	0.00074794	3.477	0	5	2.8
Q00610;P53675	Q00610	19;4	19;4	19;4	Clathrin heavy chain 1	CLTC		2	19	19	19	6	7	2	5	9	7	5	7	3	6	7	2	5	9	7	5	7	3	6	7	2	5	9	7	5	7	3	13.9	13.9	13.9	191.61	1675	1675;1640	0	74.691	5.1	5.4	1.1
Q00688	Q00688	4	4	4	Peptidyl-prolyl cis-trans isomerase FKBP3	FKBP3		1	4	4	4	2	3	2	2	3	1	2	2	2	2	3	2	2	3	1	2	2	2	2	3	2	2	3	1	2	2	2	25	25	25	25.177	224	224	0	19.498	12.5	18.8	12.5
Q00839	Q00839	2	2	2	Heterogeneous nuclear ribonucleoprotein U	HNRNPU		1	2	2	2	1	1	1	0	0	1	1	1	2	1	1	1	0	0	1	1	1	2	1	1	1	0	0	1	1	1	2	2.3	2.3	2.3	90.583	825	825	0	6.5677	1.1	1.2	1.2
Q01082;O15020;P11277	Q01082	18;2;1	18;2;1	17;1;0	Spectrin beta chain, non-erythrocytic 1	SPTBN1		3	18	18	17	7	3	2	2	5	1	7	8	2	7	3	2	2	5	1	7	8	2	6	3	2	2	5	1	7	8	2	9	9	8.7	274.61	2364	2364;2390;2137	0	53.736	3	1.5	1
Q01105;P0DME0	Q01105;P0DME0	6;5	6;5	6;5	Protein SET;Protein SETSIP	SET;SETSIP	;	2	6	6	6	3	4	3	2	4	3	3	4	3	3	4	3	2	4	3	3	4	3	3	4	3	2	4	3	3	4	3	15.5	15.5	15.5	33.488	290	290;302	0	94.988	10.7	13.1	10.7
Q01130;Q9BRL6	Q01130;Q9BRL6	2;1	2;1	2;1	Serine/arginine-rich splicing factor 2;Serine/arginine-rich splicing factor 8	SRSF2;SRSF8	;	2	2	2	2	1	0	1	0	1	0	0	0	1	1	0	1	0	1	0	0	0	1	1	0	1	0	1	0	0	0	1	8.6	8.6	8.6	25.476	221	221;282	0.0035638	2.8194	5	0	3.6
Q01459	Q01459	2	2	2	Di-N-acetylchitobiase	CTBS		1	2	2	2	1	1	1	1	1	0	1	1	0	1	1	1	1	1	0	1	1	0	1	1	1	1	1	0	1	1	0	7.3	7.3	7.3	43.759	385	385	0	6.2127	5.2	2.1	2.1
Q01518	Q01518	18	18	18	Adenylyl cyclase-associated protein 1	CAP1		1	18	18	18	5	10	10	3	11	10	8	15	8	5	10	10	3	11	10	8	15	8	5	10	10	3	11	10	8	15	8	37.1	37.1	37.1	51.901	475	475	0	137.32	12.4	23.4	20.8
Q01995	Q01995	20	20	20	Transgelin	TAGLN		1	20	20	20	17	9	6	8	7	8	11	9	6	17	9	6	8	7	8	11	9	6	17	9	6	8	7	8	11	9	6	82.1	82.1	82.1	22.611	201	201	0	134.28	76.1	49.8	29.9
Q02297	Q02297	11	11	11	Pro-neuregulin-1, membrane-bound isoform;Neuregulin-1	NRG1		1	11	11	11	2	7	4	0	5	5	0	5	6	2	7	4	0	5	5	0	5	6	2	7	4	0	5	5	0	5	6	17.8	17.8	17.8	70.391	640	640	0	42.752	3.1	12.2	6.9
Q02388	Q02388	32	32	32	Collagen alpha-1(VII) chain	COL7A1		1	32	32	32	5	15	11	5	21	16	4	17	22	5	15	11	5	21	16	4	17	22	5	15	11	5	21	16	4	17	22	13.9	13.9	13.9	295.22	2944	2944	0	323.31	1.7	5.8	5
Q02543	Q02543	6	6	6	60S ribosomal protein L18a	RPL18A		1	6	6	6	1	4	2	3	2	2	3	2	2	1	4	2	3	2	2	3	2	2	1	4	2	3	2	2	3	2	2	29	29	29	20.762	176	176	0	11.391	6.2	24.4	9.7
Q02790	Q02790	6	6	6	Peptidyl-prolyl cis-trans isomerase FKBP4;Peptidyl-prolyl cis-trans isomerase FKBP4, N-terminally processed	FKBP4		1	6	6	6	1	3	0	0	5	1	2	2	0	1	3	0	0	5	1	2	2	0	1	3	0	0	5	1	2	2	0	16.1	16.1	16.1	51.804	459	459	0	12.278	1.7	6.5	0
Q02809	Q02809	41	41	41	Procollagen-lysine,2-oxoglutarate 5-dioxygenase 1	PLOD1		1	41	41	41	34	26	25	25	28	26	27	24	23	34	26	25	25	28	26	27	24	23	34	26	25	25	28	26	27	24	23	53.5	53.5	53.5	83.549	727	727	0	323.31	48.1	42.5	39.8
Q02818	Q02818	44	44	42	Nucleobindin-1	NUCB1		1	44	44	42	40	18	18	27	22	21	28	22	22	40	18	18	27	22	21	28	22	22	38	17	17	25	22	20	26	21	21	70.1	70.1	68.3	53.879	461	461	0	323.31	67.2	36	36
Q02878	Q02878	8	8	8	60S ribosomal protein L6	RPL6		1	8	8	8	6	4	4	5	4	5	5	4	4	6	4	4	5	4	5	5	4	4	6	4	4	5	4	5	5	4	4	25	25	25	32.728	288	288	0	18.562	19.4	13.9	13.9
Q02952	Q02952	2	2	2	A-kinase anchor protein 12	AKAP12		1	2	2	2	0	1	0	0	0	1	0	1	0	0	1	0	0	0	1	0	1	0	0	1	0	0	0	1	0	1	0	1.2	1.2	1.2	191.48	1782	1782	0	4.3819	0	0.7	0
Q03167	Q03167	3	3	3	Transforming growth factor beta receptor type 3	TGFBR3		1	3	3	3	2	0	0	2	0	0	1	0	0	2	0	0	2	0	0	1	0	0	2	0	0	2	0	0	1	0	0	4.6	4.6	4.6	93.498	851	851	0	6.6121	2.6	0	0
Q03252	Q03252	7	5	4	Lamin-B2	LMNB2		1	7	5	4	0	4	2	0	2	1	6	2	0	0	3	1	0	2	1	5	2	0	0	3	1	0	2	1	4	2	0	10.3	8.8	6.7	67.688	600	600	0	8.2584	0	6.3	3.2
Q03405	Q03405	7	7	7	Urokinase plasminogen activator surface receptor	PLAUR		1	7	7	7	3	5	3	4	4	4	4	5	5	3	5	3	4	4	4	4	5	5	3	5	3	4	4	4	4	5	5	29.3	29.3	29.3	36.978	335	335	0	189.91	15.2	17.6	13.1
Q03692	Q03692	1	1	1	Collagen alpha-1(X) chain	COL10A1		1	1	1	1	0	0	0	0	1	0	1	1	0	0	0	0	0	1	0	1	1	0	0	0	0	0	1	0	1	1	0	1.9	1.9	1.9	66.157	680	680	0	4.4837	0	0	0
Q04446	Q04446	7	7	7	1,4-alpha-glucan-branching enzyme	GBE1		1	7	7	7	1	0	0	2	5	2	2	5	1	1	0	0	2	5	2	2	5	1	1	0	0	2	5	2	2	5	1	13.1	13.1	13.1	80.473	702	702	0	16.572	1.3	0	0
Q04637;O43432	Q04637;O43432	3;2	3;2	3;2	Eukaryotic translation initiation factor 4 gamma 1;Eukaryotic translation initiation factor 4 gamma 3	EIF4G1;EIF4G3	;	2	3	3	3	0	0	0	0	2	1	2	1	0	0	0	0	0	2	1	2	1	0	0	0	0	0	2	1	2	1	0	2.3	2.3	2.3	175.49	1599	1599;1585	0	4.5401	0	0	0
Q04721	Q04721	1	1	1	Neurogenic locus notch homolog protein 2;Notch 2 extracellular truncation;Notch 2 intracellular domain	NOTCH2		1	1	1	1	0	1	1	1	1	1	1	1	1	0	1	1	1	1	1	1	1	1	0	1	1	1	1	1	1	1	1	0.4	0.4	0.4	265.4	2471	2471	0.00076453	3.7416	0	0.4	0.4
Q04760	Q04760	6	6	6	Lactoylglutathione lyase	GLO1		1	6	6	6	3	3	2	1	3	3	3	2	3	3	3	2	1	3	3	3	2	3	3	3	2	1	3	3	3	2	3	31.5	31.5	31.5	20.777	184	184	0	13.744	13	13.6	8.2
Q04826;P30485;P30461	Q04826;P30485;P30461	13;8;8	1;1;1	0;0;0	HLA class I histocompatibility antigen, B-40 alpha chain;HLA class I histocompatibility antigen, B-47 alpha chain;HLA class I histocompatibility antigen, B-13 alpha chain	HLA-B	;;	3	13	1	0	7	6	6	6	8	8	9	8	5	0	1	0	0	1	0	1	0	0	0	0	0	0	0	0	0	0	0	38.1	3.3	0	40.505	362	362;362;362	0.00073964	3.3742	28.7	24.3	26.5
Q04828;P42330;P52895;P17516	Q04828;P42330	4;3;1;1	4;3;1;1	4;3;1;1	Aldo-keto reductase family 1 member C1;Aldo-keto reductase family 1 member C3	AKR1C1;AKR1C3	;	4	4	4	4	0	2	1	0	3	1	1	1	2	0	2	1	0	3	1	1	1	2	0	2	1	0	3	1	1	1	2	16.1	16.1	16.1	36.788	323	323;323;323;323	0	15.18	0	7.7	2.5
Q04917	Q04917	12	6	6	14-3-3 protein eta	YWHAH		1	12	6	6	7	4	5	3	4	3	7	3	1	4	2	3	2	0	2	5	1	0	4	2	3	2	0	2	5	1	0	39.4	26	26	28.218	246	246	0	45.263	28	19.9	20.7
Q05682	Q05682	30	30	30	Caldesmon	CALD1		1	30	30	30	20	13	7	13	6	7	16	10	6	20	13	7	13	6	7	16	10	6	20	13	7	13	6	7	16	10	6	35.3	35.3	35.3	93.23	793	793	0	155.53	22.3	17.9	8.8
Q06124	Q06124	3	3	3	Tyrosine-protein phosphatase non-receptor type 11	PTPN11		1	3	3	3	0	1	1	0	0	0	1	0	0	0	1	1	0	0	0	1	0	0	0	1	1	0	0	0	1	0	0	5.4	5.4	5.4	68.436	597	597	0	5.6681	0	1.3	1.5
Q06210;O94808	Q06210	6;2	6;2	6;2	Glutamine--fructose-6-phosphate aminotransferase [isomerizing] 1	GFPT1		2	6	6	6	0	1	0	0	6	1	1	3	0	0	1	0	0	6	1	1	3	0	0	1	0	0	6	1	1	3	0	8.2	8.2	8.2	78.806	699	699;682	0	13.49	0	1.3	0
Q06323	Q06323	6	6	6	Proteasome activator complex subunit 1	PSME1		1	6	6	6	5	3	2	3	3	1	4	2	2	5	3	2	3	3	1	4	2	2	5	3	2	3	3	1	4	2	2	26.1	26.1	26.1	28.723	249	249	0	21.501	20.5	13.3	6.8
Q06481	Q06481	27	25	25	Amyloid-like protein 2	APLP2		1	27	25	25	16	22	13	13	18	12	11	17	17	14	21	12	13	18	12	11	17	17	14	21	12	13	18	12	11	17	17	29.4	28.2	28.2	86.955	763	763	0	186.99	21.1	26.5	14.3
Q06828	Q06828	2	2	2	Fibromodulin	FMOD		1	2	2	2	0	0	0	2	0	0	1	0	1	0	0	0	2	0	0	1	0	1	0	0	0	2	0	0	1	0	1	5.6	5.6	5.6	43.178	376	376	0	5.392	0	0	0
Q06830	Q06830	19	19	15	Peroxiredoxin-1	PRDX1		1	19	19	15	17	15	11	11	13	11	13	13	11	17	15	11	11	13	11	13	13	11	13	11	8	8	10	8	9	9	8	76.9	76.9	61.8	22.11	199	199	0	120.89	76.9	75.4	51.3
Q07000	Q07000	13	2	2	HLA class I histocompatibility antigen, Cw-15 alpha chain	HLA-C		1	13	2	2	9	7	7	7	7	7	8	7	8	1	0	0	1	1	1	2	0	1	1	0	0	1	1	1	2	0	1	32.8	5.7	5.7	40.862	366	366	0	37.612	29.8	26.8	26.8
Q07020	Q07020	6	6	6	60S ribosomal protein L18	RPL18		1	6	6	6	1	4	4	1	4	6	3	3	4	1	4	4	1	4	6	3	3	4	1	4	4	1	4	6	3	3	4	35.6	35.6	35.6	21.634	188	188	0	26.836	7.4	22.3	22.3
Q07021	Q07021	1	1	1	Complement component 1 Q subcomponent-binding protein, mitochondrial	C1QBP		1	1	1	1	1	1	0	1	1	0	1	0	0	1	1	0	1	1	0	1	0	0	1	1	0	1	1	0	1	0	0	5	5	5	31.362	282	282	0	4.6928	5	5	0
Q07065	Q07065	3	3	3	Cytoskeleton-associated protein 4	CKAP4		1	3	3	3	0	0	0	1	2	1	2	1	1	0	0	0	1	2	1	2	1	1	0	0	0	1	2	1	2	1	1	6.8	6.8	6.8	66.022	602	602	0	22.204	0	0	0
Q07092	Q07092	5	5	5	Collagen alpha-1(XVI) chain	COL16A1		1	5	5	5	2	0	1	1	0	0	3	1	0	2	0	1	1	0	0	3	1	0	2	0	1	1	0	0	3	1	0	2.9	2.9	2.9	157.75	1604	1604	0	14.099	1	0	0.7
Q07666	Q07666	1	1	1	KH domain-containing, RNA-binding, signal transduction-associated protein 1	KHDRBS1		1	1	1	1	0	0	1	0	0	0	0	1	0	0	0	1	0	0	0	0	1	0	0	0	1	0	0	0	0	1	0	2.5	2.5	2.5	48.227	443	443	0	4.0357	0	0	2.5
Q07812	Q07812	1	1	1	Apoptosis regulator BAX	BAX		1	1	1	1	0	1	0	0	1	1	0	1	0	0	1	0	0	1	1	0	1	0	0	1	0	0	1	1	0	1	0	6.8	6.8	6.8	21.184	192	192	0	13.306	0	6.8	0
Q07954;Q9NZR2;O75581;O75197	Q07954	65;2;1;1	65;2;1;1	65;2;1;1	Prolow-density lipoprotein receptor-related protein 1;Low-density lipoprotein receptor-related protein 1 85 kDa subunit;Low-density lipoprotein receptor-related protein 1 515 kDa subunit;Low-density lipoprotein receptor-related protein 1 intracellular domain	LRP1		4	65	65	65	31	34	27	23	38	38	24	42	42	31	34	27	23	38	38	24	42	42	31	34	27	23	38	38	24	42	42	16	16	16	504.6	4544	4544;4599;1613;1615	0	323.31	7.1	8.1	6.2
Q07960	Q07960	5	5	5	Rho GTPase-activating protein 1	ARHGAP1		1	5	5	5	2	3	1	2	3	1	2	3	2	2	3	1	2	3	1	2	3	2	2	3	1	2	3	1	2	3	2	11.6	11.6	11.6	50.435	439	439	0	26.327	5.2	7.1	1.8
Q08380	Q08380	12	12	12	Galectin-3-binding protein	LGALS3BP		1	12	12	12	8	0	0	8	3	0	9	2	2	8	0	0	8	3	0	9	2	2	8	0	0	8	3	0	9	2	2	26.7	26.7	26.7	65.33	585	585	0	62.234	17.4	0	0
Q08397	Q08397	13	13	11	Lysyl oxidase homolog 1	LOXL1		1	13	13	11	8	1	1	8	2	3	9	1	3	8	1	1	8	2	3	9	1	3	7	1	0	6	1	2	8	0	2	26.3	26.3	24.6	63.109	574	574	0	42.15	16	2.1	1.4
Q08431	Q08431	18	18	18	Lactadherin;Lactadherin short form;Medin	MFGE8		1	18	18	18	17	11	10	12	11	14	12	11	10	17	11	10	12	11	14	12	11	10	17	11	10	12	11	14	12	11	10	48.1	48.1	48.1	43.122	387	387	0	196.55	48.1	35.1	30.2
Q08629;Q9BQ16	Q08629	16;1	16;1	16;1	Testican-1	SPOCK1		2	16	16	16	8	8	6	4	7	10	7	9	10	8	8	6	4	7	10	7	9	10	8	8	6	4	7	10	7	9	10	35.8	35.8	35.8	49.124	439	439;436	0	84.958	15.5	18.5	11.2
Q08J23	Q08J23	1	1	1	tRNA (cytosine(34)-C(5))-methyltransferase	NSUN2		1	1	1	1	0	0	0	0	0	0	0	1	0	0	0	0	0	0	0	0	1	0	0	0	0	0	0	0	0	1	0	1.4	1.4	1.4	86.47	767	767	0.0041322	2.4672	0	0	0
Q09328	Q09328	9	9	9	Alpha-1,6-mannosylglycoprotein 6-beta-N-acetylglucosaminyltransferase A	MGAT5		1	9	9	9	6	0	0	3	4	2	5	2	1	6	0	0	3	4	2	5	2	1	6	0	0	3	4	2	5	2	1	13	13	13	84.542	741	741	0	18.404	9	0	0
Q09666	Q09666	120	120	120	Neuroblast differentiation-associated protein AHNAK	AHNAK		1	120	120	120	49	50	34	26	42	33	44	63	36	49	50	34	26	42	33	44	63	36	49	50	34	26	42	33	44	63	36	40.6	40.6	40.6	629.09	5890	5890	0	323.31	21.6	23.5	17.6
Q10469	Q10469	4	4	4	Alpha-1,6-mannosyl-glycoprotein 2-beta-N-acetylglucosaminyltransferase	MGAT2		1	4	4	4	1	0	1	2	1	0	1	0	1	1	0	1	2	1	0	1	0	1	1	0	1	2	1	0	1	0	1	12.5	12.5	12.5	51.55	447	447	0	10.698	3.6	0	1.8
Q10471	Q10471	16	16	16	Polypeptide N-acetylgalactosaminyltransferase 2;Polypeptide N-acetylgalactosaminyltransferase 2 soluble form	GALNT2		1	16	16	16	12	1	1	6	5	2	5	3	4	12	1	1	6	5	2	5	3	4	12	1	1	6	5	2	5	3	4	32.6	32.6	32.6	64.732	571	571	0	83.961	24.7	1.8	3.2
Q10472	Q10472	2	2	2	Polypeptide N-acetylgalactosaminyltransferase 1;Polypeptide N-acetylgalactosaminyltransferase 1 soluble form	GALNT1		1	2	2	2	1	0	0	0	0	1	1	0	1	1	0	0	0	0	1	1	0	1	1	0	0	0	0	1	1	0	1	3.8	3.8	3.8	64.218	559	559	0	4.2399	2.1	0	0
Q10567	Q10567	3	1	1	AP-1 complex subunit beta-1	AP1B1		1	3	1	1	1	0	0	0	1	0	1	0	0	0	0	0	0	0	0	1	0	0	0	0	0	0	0	0	1	0	0	3.2	1.2	1.2	104.64	949	949	0.0041096	2.4268	1.2	0	0
Q10588	Q10588	6	6	6	ADP-ribosyl cyclase/cyclic ADP-ribose hydrolase 2	BST1		1	6	6	6	5	0	0	4	0	0	2	0	0	5	0	0	4	0	0	2	0	0	5	0	0	4	0	0	2	0	0	22.6	22.6	22.6	35.724	318	318	0	34.003	20.1	0	0
Q12765	Q12765	2	2	2	Secernin-1	SCRN1		1	2	2	2	0	2	0	1	2	0	0	2	0	0	2	0	1	2	0	0	2	0	0	2	0	1	2	0	0	2	0	5.1	5.1	5.1	46.382	414	414	0	4.3648	0	5.1	0
Q12792	Q12792	5	4	4	Twinfilin-1	TWF1		1	5	4	4	5	4	3	3	4	3	3	2	3	4	3	2	2	3	2	2	1	2	4	3	2	2	3	2	2	1	2	15.7	13.7	13.7	40.282	350	350	0	52.889	15.7	12	8.3
Q12797	Q12797	11	11	11	Aspartyl/asparaginyl beta-hydroxylase	ASPH		1	11	11	11	6	4	3	4	3	1	5	5	2	6	4	3	4	3	1	5	5	2	6	4	3	4	3	1	5	5	2	13.6	13.6	13.6	85.862	758	758	0	27.021	7.7	4.4	3.3
Q12805	Q12805	18	18	18	EGF-containing fibulin-like extracellular matrix protein 1	EFEMP1		1	18	18	18	16	0	0	11	0	1	14	0	0	16	0	0	11	0	1	14	0	0	16	0	0	11	0	1	14	0	0	39.1	39.1	39.1	54.64	493	493	0	141.1	34.3	0	0
Q12841	Q12841	32	32	32	Follistatin-related protein 1	FSTL1		1	32	32	32	28	17	16	26	16	17	22	18	20	28	17	16	26	16	17	22	18	20	28	17	16	26	16	17	22	18	20	58.8	58.8	58.8	34.985	308	308	0	323.31	55.5	40.9	40.9
Q12874	Q12874	2	2	2	Splicing factor 3A subunit 3	SF3A3		1	2	2	2	0	2	0	0	1	0	0	0	0	0	2	0	0	1	0	0	0	0	0	2	0	0	1	0	0	0	0	4.2	4.2	4.2	58.848	501	501	0	4.2073	0	4.2	0
Q12884	Q12884	2	2	2	Prolyl endopeptidase FAP;Antiplasmin-cleaving enzyme FAP, soluble form	FAP		1	2	2	2	0	0	0	1	0	0	0	1	0	0	0	0	1	0	0	0	1	0	0	0	0	1	0	0	0	1	0	2.9	2.9	2.9	87.711	760	760	0.0007593	3.6265	0	0	0
Q12904	Q12904	1	1	1	Aminoacyl tRNA synthase complex-interacting multifunctional protein 1;Endothelial monocyte-activating polypeptide 2	AIMP1		1	1	1	1	0	0	0	0	0	0	0	1	1	0	0	0	0	0	0	0	1	1	0	0	0	0	0	0	0	1	1	3.8	3.8	3.8	34.352	312	312	0.00074738	3.4757	0	0	0
Q12905	Q12905	3	3	3	Interleukin enhancer-binding factor 2	ILF2		1	3	3	3	0	0	0	0	1	0	1	2	0	0	0	0	0	1	0	1	2	0	0	0	0	0	1	0	1	2	0	16.2	16.2	16.2	43.062	390	390	0	7.8338	0	0	0
Q12906	Q12906	9	9	8	Interleukin enhancer-binding factor 3	ILF3		1	9	9	8	2	4	3	2	4	3	4	4	3	2	4	3	2	4	3	4	4	3	2	4	3	2	4	2	3	4	3	11.9	11.9	10.4	95.337	894	894	0	19.506	2.1	4.5	3.2
Q12907	Q12907	13	13	13	Vesicular integral-membrane protein VIP36	LMAN2		1	13	13	13	9	5	7	5	5	7	5	4	9	9	5	7	5	5	7	5	4	9	9	5	7	5	5	7	5	4	9	36.2	36.2	36.2	40.228	356	356	0	205.33	29.5	16.9	19.4
Q12955	Q12955	1	1	1	Ankyrin-3	ANK3		1	1	1	1	0	0	1	0	0	0	0	0	0	0	0	1	0	0	0	0	0	0	0	0	1	0	0	0	0	0	0	0.2	0.2	0.2	480.4	4377	4377	1	-2	0	0	0.2
Q13045	Q13045	2	2	2	Protein flightless-1 homolog	FLII		1	2	2	2	1	2	0	1	2	1	1	0	2	1	2	0	1	2	1	1	0	2	1	2	0	1	2	1	1	0	2	1.4	1.4	1.4	144.75	1269	1269	0.0034722	2.5564	0.9	1.4	0
Q13126	Q13126	3	3	3	S-methyl-5-thioadenosine phosphorylase	MTAP		1	3	3	3	1	2	0	0	3	0	1	2	1	1	2	0	0	3	0	1	2	1	1	2	0	0	3	0	1	2	1	15.5	15.5	15.5	31.236	283	283	0	17.858	6	12.4	0
Q13162	Q13162	8	5	5	Peroxiredoxin-4	PRDX4		1	8	5	5	4	7	4	2	7	5	6	7	5	1	4	2	0	5	3	3	4	3	1	4	2	0	5	3	3	4	3	33.6	26.6	26.6	30.54	271	271	0	51.009	11.4	24.4	12.5
Q13177;O75914	Q13177;O75914	4;2	4;2	4;2	Serine/threonine-protein kinase PAK 2;PAK-2p27;PAK-2p34;Serine/threonine-protein kinase PAK 3	PAK2;PAK3	;	2	4	4	4	0	2	3	2	3	2	0	3	2	0	2	3	2	3	2	0	3	2	0	2	3	2	3	2	0	3	2	7.6	7.6	7.6	58.042	524	524;559	0	10.455	0	4	5.7
Q13185	Q13185	3	3	3	Chromobox protein homolog 3	CBX3		1	3	3	3	1	1	0	0	2	0	1	1	1	1	1	0	0	2	0	1	1	1	1	1	0	0	2	0	1	1	1	21.3	21.3	21.3	20.811	183	183	0	8.1246	7.1	6.6	0
Q13188	Q13188	1	1	1	Serine/threonine-protein kinase 3;Serine/threonine-protein kinase 3 36kDa subunit;Serine/threonine-protein kinase 3 20kDa subunit	STK3		1	1	1	1	0	1	0	0	0	0	0	0	0	0	1	0	0	0	0	0	0	0	0	1	0	0	0	0	0	0	0	3.3	3.3	3.3	56.3	491	491	1	-2	0	3.3	0
Q13200	Q13200	6	6	6	26S proteasome non-ATPase regulatory subunit 2	PSMD2		1	6	6	6	1	2	2	0	5	1	2	1	1	1	2	2	0	5	1	2	1	1	1	2	2	0	5	1	2	1	1	8.4	8.4	8.4	100.2	908	908	0	18.23	1.7	2.5	2.5
Q13214	Q13214	4	3	3	Semaphorin-3B	SEMA3B		1	4	3	3	1	1	1	1	2	2	1	1	2	0	0	0	0	1	1	0	0	1	0	0	0	0	1	1	0	0	1	5.9	4.4	4.4	83.121	749	749	0	5.9788	1.5	1.5	1.5
Q13217	Q13217	8	8	8	DnaJ homolog subfamily C member 3	DNAJC3		1	8	8	8	2	1	1	1	5	3	1	4	4	2	1	1	1	5	3	1	4	4	2	1	1	1	5	3	1	4	4	12.5	12.5	12.5	57.579	504	504	0	13.507	4	1.4	1.4
Q13219	Q13219	22	22	22	Pappalysin-1	PAPPA		1	22	22	22	14	3	2	12	3	6	10	2	8	14	3	2	12	3	6	10	2	8	14	3	2	12	3	6	10	2	8	13.3	13.3	13.3	180.97	1627	1627	0	57.512	7.9	1.7	1.3
Q13253	Q13253	1	1	1	Noggin	NOG		1	1	1	1	0	0	1	0	1	1	0	0	1	0	0	1	0	1	1	0	0	1	0	0	1	0	1	1	0	0	1	3.4	3.4	3.4	25.774	232	232	0.00076104	3.6618	0	0	3.4
Q13263	Q13263	3	3	3	Transcription intermediary factor 1-beta	TRIM28		1	3	3	3	0	0	0	0	1	1	1	2	0	0	0	0	0	1	1	1	2	0	0	0	0	0	1	1	1	2	0	3.7	3.7	3.7	88.549	835	835	0	5.9435	0	0	0
Q13283	Q13283	4	4	4	Ras GTPase-activating protein-binding protein 1	G3BP1		1	4	4	4	1	2	1	2	3	2	2	4	2	1	2	1	2	3	2	2	4	2	1	2	1	2	3	2	2	4	2	11.8	11.8	11.8	52.164	466	466	0	15.846	1.9	4.7	1.9
Q13308	Q13308	17	17	17	Inactive tyrosine-protein kinase 7	PTK7		1	17	17	17	8	5	6	8	6	11	8	10	10	8	5	6	8	6	11	8	10	10	8	5	6	8	6	11	8	10	10	24.2	24.2	24.2	118.39	1070	1070	0	163.82	11.6	6.7	9.3
Q13310	Q13310	7	3	2	Polyadenylate-binding protein 4	PABPC4		1	7	3	2	2	5	3	2	4	1	4	3	4	1	1	1	0	2	1	2	1	2	0	1	0	0	1	1	1	0	1	12.9	4.7	3.3	70.782	644	644	0	5.6887	3.7	9.6	6.4
Q13332;P23468	Q13332	20;2	20;2	20;2	Receptor-type tyrosine-protein phosphatase S	PTPRS		2	20	20	20	10	6	8	7	9	8	5	8	11	10	6	8	7	9	8	5	8	11	10	6	8	7	9	8	5	8	11	14	14	14	217.04	1948	1948;1912	0	180.23	7.8	4.8	6.6
Q13347	Q13347	7	7	7	Eukaryotic translation initiation factor 3 subunit I	EIF3I		1	7	7	7	3	3	2	0	1	2	3	3	2	3	3	2	0	1	2	3	3	2	3	3	2	0	1	2	3	3	2	24.9	24.9	24.9	36.501	325	325	0	22.47	12.3	12.3	7.4
Q13404;Q15819	Q13404;Q15819	7;4	7;4	7;4	Ubiquitin-conjugating enzyme E2 variant 1;Ubiquitin-conjugating enzyme E2 variant 2	UBE2V1;UBE2V2	;	2	7	7	7	4	4	4	2	4	3	4	3	3	4	4	4	2	4	3	4	3	3	4	4	4	2	4	3	4	3	3	36.7	36.7	36.7	16.495	147	147;145	0	16.902	23.1	17.7	25.9
Q13409	Q13409	5	5	5	Cytoplasmic dynein 1 intermediate chain 2	DYNC1I2		1	5	5	5	2	1	1	2	1	0	3	2	0	2	1	1	2	1	0	3	2	0	2	1	1	2	1	0	3	2	0	10.8	10.8	10.8	71.456	638	638	0	20.605	6.7	2.2	2.2
Q13438	Q13438	11	11	11	Protein OS-9	OS9		1	11	11	11	3	6	4	4	6	4	3	7	6	3	6	4	4	6	4	3	7	6	3	6	4	4	6	4	3	7	6	20.4	20.4	20.4	75.561	667	667	0	57.767	4.6	11.2	6.3
Q13442	Q13442	4	4	4	28 kDa heat- and acid-stable phosphoprotein	PDAP1		1	4	4	4	1	1	0	1	2	0	1	1	0	1	1	0	1	2	0	1	1	0	1	1	0	1	2	0	1	1	0	21.5	21.5	21.5	20.63	181	181	0	9.6734	6.1	6.1	0
Q13443	Q13443	7	7	7	Disintegrin and metalloproteinase domain-containing protein 9	ADAM9		1	7	7	7	7	2	3	4	3	4	4	4	3	7	2	3	4	3	4	4	4	3	7	2	3	4	3	4	4	4	3	8.7	8.7	8.7	90.555	819	819	0	95.937	8.7	2.9	5.1
Q13444	Q13444	4	4	4	Disintegrin and metalloproteinase domain-containing protein 15	ADAM15		1	4	4	4	1	0	0	3	0	0	4	0	1	1	0	0	3	0	0	4	0	1	1	0	0	3	0	0	4	0	1	7.3	7.3	7.3	92.958	863	863	0	40.094	2.1	0	0
Q13509	Q13509	9	2	2	Tubulin beta-3 chain	TUBB3		1	9	2	2	6	4	4	2	3	2	3	5	2	0	0	0	0	1	0	0	2	0	0	0	0	0	1	0	0	2	0	24.2	8.4	8.4	50.432	450	450	0	6.6851	13.6	7.3	10.4
Q13510	Q13510	2	2	2	Acid ceramidase;Acid ceramidase subunit alpha;Acid ceramidase subunit beta	ASAH1		1	2	2	2	0	0	0	1	0	0	2	0	0	0	0	0	1	0	0	2	0	0	0	0	0	1	0	0	2	0	0	5.1	5.1	5.1	44.659	395	395	0.0036049	2.9251	0	0	0
Q13557;Q9UQM7;Q13554;Q13555	Q13557	5;2;2;1	5;2;2;1	5;2;2;1	Calcium/calmodulin-dependent protein kinase type II subunit delta	CAMK2D		4	5	5	5	0	0	0	0	2	0	2	1	0	0	0	0	0	2	0	2	1	0	0	0	0	0	2	0	2	1	0	11	11	11	56.369	499	499;478;666;558	0	10.699	0	0	0
Q13561	Q13561	9	9	9	Dynactin subunit 2	DCTN2		1	9	9	9	4	4	0	0	3	2	2	5	1	4	4	0	0	3	2	2	5	1	4	4	0	0	3	2	2	5	1	24.9	24.9	24.9	44.23	401	401	0	26.927	12	10.5	0
Q13591	Q13591	17	17	17	Semaphorin-5A	SEMA5A		1	17	17	17	13	6	5	8	5	7	11	8	7	13	6	5	8	5	7	11	8	7	13	6	5	8	5	7	11	8	7	17.2	17.2	17.2	120.61	1074	1074	0	77.153	14.1	5.4	3.8
Q13596	Q13596	2	2	2	Sorting nexin-1	SNX1		1	2	2	2	0	0	0	0	1	0	1	1	0	0	0	0	0	1	0	1	1	0	0	0	0	0	1	0	1	1	0	4.8	4.8	4.8	59.069	522	522	0	4.8083	0	0	0
Q13610	Q13610	2	2	2	Periodic tryptophan protein 1 homolog	PWP1		1	2	2	2	0	0	0	0	1	0	0	2	0	0	0	0	0	1	0	0	2	0	0	0	0	0	1	0	0	2	0	7.2	7.2	7.2	55.827	501	501	0	7.0212	0	0	0
Q13619;Q13620	Q13619;Q13620	1;1	1;1	1;1	Cullin-4A;Cullin-4B	CUL4A;CUL4B	;	2	1	1	1	0	0	0	0	0	0	0	0	1	0	0	0	0	0	0	0	0	1	0	0	0	0	0	0	0	0	1	1.6	1.6	1.6	87.679	759	759;913	0.0098361	2.0933	0	0	0
Q13630	Q13630	4	4	4	GDP-L-fucose synthase	TSTA3		1	4	4	4	1	0	0	0	1	0	2	3	2	1	0	0	0	1	0	2	3	2	1	0	0	0	1	0	2	3	2	14.3	14.3	14.3	35.892	321	321	0	6.5082	3.7	0	0
Q13641	Q13641	2	2	2	Trophoblast glycoprotein	TPBG		1	2	2	2	0	1	1	1	0	2	1	2	1	0	1	1	1	0	2	1	2	1	0	1	1	1	0	2	1	2	1	5	5	5	46.031	420	420	0	5	0	2.6	2.6
Q13642	Q13642	5	5	5	Four and a half LIM domains protein 1	FHL1		1	5	5	5	3	1	1	2	0	2	3	1	0	3	1	1	2	0	2	3	1	0	3	1	1	2	0	2	3	1	0	13.9	13.9	13.9	36.263	323	323	0	16.748	9.9	3.1	3.7
Q13740	Q13740	11	11	11	CD166 antigen	ALCAM		1	11	11	11	9	2	3	7	5	3	7	2	3	9	2	3	7	5	3	7	2	3	9	2	3	7	5	3	7	2	3	19.2	19.2	19.2	65.102	583	583	0	36.574	19	5.3	7
Q13765;E9PAV3;Q9BZK3	Q13765;E9PAV3	3;3;1	3;3;1	3;3;1	Nascent polypeptide-associated complex subunit alpha;Nascent polypeptide-associated complex subunit alpha, muscle-specific form	NACA	;	3	3	3	3	2	1	1	2	2	2	1	2	2	2	1	1	2	2	2	1	2	2	2	1	1	2	2	2	1	2	2	19.5	19.5	19.5	23.384	215	215;2078;213	0	50.631	12.6	6	6
Q13813	Q13813	28	28	28	Spectrin alpha chain, non-erythrocytic 1	SPTAN1		1	28	28	28	7	6	4	7	9	4	12	10	3	7	6	4	7	9	4	12	10	3	7	6	4	7	9	4	12	10	3	13.7	13.7	13.7	284.54	2472	2472	0	81.049	3.8	3	2.2
Q13822	Q13822	43	43	43	Ectonucleotide pyrophosphatase/phosphodiesterase family member 2	ENPP2		1	43	43	43	39	10	10	27	12	9	31	13	9	39	10	10	27	12	9	31	13	9	39	10	10	27	12	9	31	13	9	40.9	40.9	40.9	98.993	863	863	0	323.31	37.9	8.3	8.3
Q13838;O00148	Q13838;O00148	12;9	12;9	12;9	Spliceosome RNA helicase DDX39B;ATP-dependent RNA helicase DDX39A	DDX39B;DDX39A	;	2	12	12	12	5	5	4	2	4	2	8	7	3	5	5	4	2	4	2	8	7	3	5	5	4	2	4	2	8	7	3	24.3	24.3	24.3	48.991	428	428;427	0	59.353	15.7	11.9	6.8
Q13867	Q13867	2	2	2	Bleomycin hydrolase	BLMH		1	2	2	2	0	1	0	0	0	0	1	1	1	0	1	0	0	0	0	1	1	1	0	1	0	0	0	0	1	1	1	6.8	6.8	6.8	52.562	455	455	0	4.2412	0	4.4	0
Q13885;Q9BVA1;A6NNZ2;CON__ENSEMBL:ENSBTAP00000025008;Q9H4B7	Q13885;Q9BVA1;A6NNZ2	13;12;8;4;4	2;1;0;0;0	2;1;0;0;0	Tubulin beta-2A chain;Tubulin beta-2B chain;Tubulin beta-8 chain-like protein LOC260334	TUBB2A;TUBB2B	;;	5	13	2	2	8	6	6	2	8	5	5	8	4	0	1	2	0	2	1	1	2	1	0	1	2	0	2	1	1	2	1	28.3	4.7	4.7	49.906	445	445;445;444;536;451	0	6.6552	18.7	11.2	14.4
Q14019	Q14019	8	8	8	Coactosin-like protein	COTL1		1	8	8	8	4	5	2	4	4	4	6	3	2	4	5	2	4	4	4	6	3	2	4	5	2	4	4	4	6	3	2	49.3	49.3	49.3	15.945	142	142	0	45.768	44.4	35.9	11.3
Q14103	Q14103	10	10	8	Heterogeneous nuclear ribonucleoprotein D0	HNRNPD		1	10	10	8	6	3	3	3	5	6	4	5	5	6	3	3	3	5	6	4	5	5	5	2	2	2	4	4	3	4	3	26.2	26.2	25.6	38.434	355	355	0	47.701	18.9	10.4	8.7
Q14112	Q14112	41	40	40	Nidogen-2	NID2		1	41	40	40	24	16	9	29	14	16	24	18	14	23	16	9	28	13	16	23	17	14	23	16	9	28	13	16	23	17	14	29.2	29.2	29.2	151.25	1375	1375	0	323.31	19.1	14.6	10
Q14118	Q14118	17	17	17	Dystroglycan;Alpha-dystroglycan;Beta-dystroglycan	DAG1		1	17	17	17	13	4	1	6	5	4	9	4	5	13	4	1	6	5	4	9	4	5	13	4	1	6	5	4	9	4	5	22.7	22.7	22.7	97.44	895	895	0	102.37	19.1	6.6	1.2
Q14152	Q14152	7	7	7	Eukaryotic translation initiation factor 3 subunit A	EIF3A		1	7	7	7	0	3	2	0	1	1	1	5	2	0	3	2	0	1	1	1	5	2	0	3	2	0	1	1	1	5	2	4.9	4.9	4.9	166.57	1382	1382	0	13.486	0	2	1.5
Q14192	Q14192	2	2	2	Four and a half LIM domains protein 2	FHL2		1	2	2	2	0	1	0	1	2	0	0	0	0	0	1	0	1	2	0	0	0	0	0	1	0	1	2	0	0	0	0	9	9	9	32.193	279	279	0.0053476	2.2052	0	2.5	0
Q14195;Q14117;Q14194	Q14195	9;1;1	9;1;1	9;1;1	Dihydropyrimidinase-related protein 3	DPYSL3		3	9	9	9	4	1	1	1	3	1	4	5	0	4	1	1	1	3	1	4	5	0	4	1	1	1	3	1	4	5	0	18.9	18.9	18.9	61.963	570	570;519;572	0	25.892	10.7	1.6	2.8
Q14204	Q14204	16	16	16	Cytoplasmic dynein 1 heavy chain 1	DYNC1H1		1	16	16	16	2	5	3	1	8	2	3	13	2	2	5	3	1	8	2	3	13	2	2	5	3	1	8	2	3	13	2	3.9	3.9	3.9	532.4	4646	4646	0	51.637	0.4	1.2	0.6
Q14247	Q14247	7	7	7	Src substrate cortactin	CTTN		1	7	7	7	0	2	1	2	1	1	0	5	1	0	2	1	2	1	1	0	5	1	0	2	1	2	1	1	0	5	1	16	16	16	61.585	550	550	0	17.772	0	3.6	1.8
Q14257	Q14257	2	2	2	Reticulocalbin-2	RCN2		1	2	2	2	0	0	0	0	1	1	0	2	0	0	0	0	0	1	1	0	2	0	0	0	0	0	1	1	0	2	0	8.5	8.5	8.5	36.876	317	317	0.00075529	3.5955	0	0	0
Q14315	Q14315	83	74	71	Filamin-C	FLNC		1	83	74	71	48	44	29	35	46	34	47	52	39	42	39	25	30	41	30	41	47	33	42	37	24	29	39	29	40	44	32	34.3	32	30.6	291.02	2725	2725	0	323.31	20.9	19.6	11.6
Q14332;O75084	Q14332;O75084	1;1	1;1	1;1	Frizzled-2;Frizzled-7	FZD2;FZD7	;	2	1	1	1	1	0	0	1	1	1	1	1	0	1	0	0	1	1	1	1	1	0	1	0	0	1	1	1	1	1	0	1.4	1.4	1.4	63.553	565	565;574	0.0041408	2.4841	1.4	0	0
Q14393	Q14393	26	26	26	Growth arrest-specific protein 6	GAS6		1	26	26	26	22	1	1	16	2	3	20	3	2	22	1	1	16	2	3	20	3	2	22	1	1	16	2	3	20	3	2	38.7	38.7	38.7	79.676	721	721	0	222.79	35.5	1.4	2.4
Q14444	Q14444	3	3	3	Caprin-1	CAPRIN1		1	3	3	3	2	0	0	0	0	0	1	2	0	2	0	0	0	0	0	1	2	0	2	0	0	0	0	0	1	2	0	4.8	4.8	4.8	78.365	709	709	0	7.694	3.1	0	0
Q14517;Q8TDW7	Q14517	20;1	20;1	20;1	Protocadherin Fat 1;Protocadherin Fat 1, nuclear form	FAT1		2	20	20	20	10	0	0	6	3	3	6	1	5	10	0	0	6	3	3	6	1	5	10	0	0	6	3	3	6	1	5	5.6	5.6	5.6	506.27	4588	4588;4589	0	46.883	2.8	0	0
Q14563	Q14563	15	15	14	Semaphorin-3A	SEMA3A		1	15	15	14	4	3	5	5	8	11	4	11	9	4	3	5	5	8	11	4	11	9	3	2	4	4	7	10	3	10	8	23	23	21.5	88.888	771	771	0	53.297	4.9	4.2	6.5
Q14683	Q14683	1	1	1	Structural maintenance of chromosomes protein 1A	SMC1A		1	1	1	1	0	0	0	1	0	0	0	1	1	0	0	0	1	0	0	0	1	1	0	0	0	1	0	0	0	1	1	0.8	0.8	0.8	143.23	1233	1233	1	-2	0	0	0
Q14697	Q14697	18	18	18	Neutral alpha-glucosidase AB	GANAB		1	18	18	18	10	8	8	11	7	9	14	10	8	10	8	8	11	7	9	14	10	8	10	8	8	11	7	9	14	10	8	19.6	19.6	19.6	106.87	944	944	0	87.449	11.1	10	9.5
Q14699	Q14699	2	2	2	Raftlin	RFTN1		1	2	2	2	2	1	0	1	0	0	0	0	0	2	1	0	1	0	0	0	0	0	2	1	0	1	0	0	0	0	0	3.3	3.3	3.3	63.145	578	578	0.0035162	2.7122	3.3	1.4	0
Q14703	Q14703	2	2	2	Membrane-bound transcription factor site-1 protease	MBTPS1		1	2	2	2	2	1	1	2	0	1	2	0	1	2	1	1	2	0	1	2	0	1	2	1	1	2	0	1	2	0	1	2.3	2.3	2.3	117.75	1052	1052	0	5.545	2.3	1	1
Q14764	Q14764	20	20	20	Major vault protein	MVP		1	20	20	20	0	12	8	0	15	11	0	12	8	0	12	8	0	15	11	0	12	8	0	12	8	0	15	11	0	12	8	23.5	23.5	23.5	99.326	893	893	0	72.042	0	13.1	9.7
Q14766	Q14766	52	52	51	Latent-transforming growth factor beta-binding protein 1	LTBP1		1	52	52	51	32	30	28	30	27	29	28	31	29	32	30	28	30	27	29	28	31	29	32	30	28	30	27	29	27	31	29	35.3	35.3	34.8	186.79	1721	1721	0	323.31	24.8	22.4	21
Q14767	Q14767	45	45	45	Latent-transforming growth factor beta-binding protein 2	LTBP2		1	45	45	45	33	33	28	28	30	28	33	32	29	33	33	28	28	30	28	33	32	29	33	33	28	28	30	28	33	32	29	22.8	22.8	22.8	195.05	1821	1821	0	323.31	19.6	18.3	16.4
Q14847	Q14847	8	8	8	LIM and SH3 domain protein 1	LASP1		1	8	8	8	4	4	3	2	4	4	2	4	1	4	4	3	2	4	4	2	4	1	4	4	3	2	4	4	2	4	1	24.9	24.9	24.9	29.717	261	261	0	31.862	11.9	13.4	12.6
Q14914	Q14914	2	2	2	Prostaglandin reductase 1	PTGR1		1	2	2	2	0	1	1	1	1	1	2	1	1	0	1	1	1	1	1	2	1	1	0	1	1	1	1	1	2	1	1	7.3	7.3	7.3	35.869	329	329	0	22.194	0	4.3	4.3
Q14964;Q9NRW1;P20340	Q14964;Q9NRW1;P20340	2;1;1	2;1;1	2;1;1	Ras-related protein Rab-39A;Ras-related protein Rab-6B;Ras-related protein Rab-6A	RAB39A;RAB6B;RAB6A	;;	3	2	2	2	1	1	0	1	1	0	1	0	0	1	1	0	1	1	0	1	0	0	1	1	0	1	1	0	1	0	0	9.2	9.2	9.2	25.006	217	217;208;208	0.0021898	3.1077	5.1	5.1	0
Q14974	Q14974	6	6	6	Importin subunit beta-1	KPNB1		1	6	6	6	4	2	2	2	6	3	3	3	2	4	2	2	2	6	3	3	3	2	4	2	2	2	6	3	3	3	2	7.6	7.6	7.6	97.169	876	876	0	35.097	4.3	3.1	2.5
Q15008	Q15008	4	4	4	26S proteasome non-ATPase regulatory subunit 6	PSMD6		1	4	4	4	0	2	1	0	3	2	2	3	3	0	2	1	0	3	2	2	3	3	0	2	1	0	3	2	2	3	3	10.3	10.3	10.3	45.531	389	389	0	10.104	0	5.4	2.3
Q15019	Q15019	6	6	6	Septin-2	2002-09-01		1	6	6	6	3	2	0	2	3	4	4	5	3	3	2	0	2	3	4	4	5	3	3	2	0	2	3	4	4	5	3	23.5	23.5	23.5	41.487	361	361	0	31.074	10.2	7.2	0
Q15027	Q15027	1	1	1	Arf-GAP with coiled-coil, ANK repeat and PH domain-containing protein 1	ACAP1		1	1	1	1	1	0	0	1	1	1	1	1	1	1	0	0	1	1	1	1	1	1	1	0	0	1	1	1	1	1	1	2.2	2.2	2.2	81.535	740	740	0	4.6681	2.2	0	0
Q15043	Q15043	1	1	1	Zinc transporter ZIP14	SLC39A14		1	1	1	1	0	0	0	1	1	0	1	1	0	0	0	0	1	1	0	1	1	0	0	0	0	1	1	0	1	1	0	2.6	2.6	2.6	54.212	492	492	0	4.228	0	0	0
Q15046	Q15046	3	3	3	Lysine--tRNA ligase	KARS		1	3	3	3	0	1	0	0	2	0	0	3	1	0	1	0	0	2	0	0	3	1	0	1	0	0	2	0	0	3	1	5.4	5.4	5.4	68.047	597	597	0.00074294	3.4178	0	1.2	0
Q15056	Q15056	5	5	5	Eukaryotic translation initiation factor 4H	EIF4H		1	5	5	5	1	4	1	1	3	1	3	4	2	1	4	1	1	3	1	3	4	2	1	4	1	1	3	1	3	4	2	27.4	27.4	27.4	27.385	248	248	0	29.871	4	18.1	4
Q15063;CON__Q2KJC7	Q15063;CON__Q2KJC7	45;23	45;23	45;23	Periostin	POSTN	;	2	45	45	45	36	6	7	29	12	5	30	9	13	36	6	7	29	12	5	30	9	13	36	6	7	29	12	5	30	9	13	46.9	46.9	46.9	93.313	836	836;779	0	323.31	40.7	10.6	12.3
Q15075	Q15075	10	10	10	Early endosome antigen 1	EEA1		1	10	10	10	2	5	1	0	2	1	1	2	1	2	5	1	0	2	1	1	2	1	2	5	1	0	2	1	1	2	1	6.7	6.7	6.7	162.46	1411	1411	0	14.645	1.1	3.5	0.7
Q15084	Q15084	12	12	12	Protein disulfide-isomerase A6	PDIA6		1	12	12	12	8	6	5	3	5	6	6	3	5	8	6	5	3	5	6	6	3	5	8	6	5	3	5	6	6	3	5	26.6	26.6	26.6	48.121	440	440	0	137.36	20.2	16.4	13.9
Q15102	Q15102	2	2	2	Platelet-activating factor acetylhydrolase IB subunit gamma	PAFAH1B3		1	2	2	2	1	0	0	0	2	0	0	1	1	1	0	0	0	2	0	0	1	1	1	0	0	0	2	0	0	1	1	7.4	7.4	7.4	25.734	231	231	0	4.7638	3.5	0	0
Q15113	Q15113	37	37	37	Procollagen C-endopeptidase enhancer 1	PCOLCE		1	37	37	37	29	21	19	19	23	18	19	17	22	29	21	19	19	23	18	19	17	22	29	21	19	19	23	18	19	17	22	68.4	68.4	68.4	47.972	449	449	0	323.31	64.8	50.3	52.6
Q15121	Q15121	3	3	3	Astrocytic phosphoprotein PEA-15	PEA15		1	3	3	3	1	3	2	1	2	0	1	3	1	1	3	2	1	2	0	1	3	1	1	3	2	1	2	0	1	3	1	26.9	26.9	26.9	15.04	130	130	0	11.013	9.2	26.9	16.9
Q15149	Q15149	145	145	142	Plectin	PLEC		1	145	145	142	77	61	50	52	74	54	85	73	58	77	61	50	52	74	54	85	73	58	77	58	49	51	74	54	84	73	58	34	34	33	531.78	4684	4684	0	323.31	18.3	16	12
Q15155;P69849;Q5JPE7	Q15155;P69849;Q5JPE7	7;7;7	7;7;7	7;7;7	Nodal modulator 1;Nodal modulator 3;Nodal modulator 2	NOMO1;NOMO3;NOMO2	;;	3	7	7	7	1	0	0	2	1	2	2	2	1	1	0	0	2	1	2	2	2	1	1	0	0	2	1	2	2	2	1	7.1	7.1	7.1	134.32	1222	1222;1222;1267	0	23.097	0.8	0	0
Q15181	Q15181	5	5	5	Inorganic pyrophosphatase	PPA1		1	5	5	5	2	2	2	1	2	2	1	2	2	2	2	2	1	2	2	1	2	2	2	2	2	1	2	2	1	2	2	22.5	22.5	22.5	32.66	289	289	0	11.946	9.3	12.8	8.3
Q15185	Q15185	3	3	3	Prostaglandin E synthase 3	PTGES3		1	3	3	3	2	2	1	1	1	1	2	2	1	2	2	1	1	1	1	2	2	1	2	2	1	1	1	1	2	2	1	25	25	25	18.697	160	160	0	9.6908	20	15.6	5
Q15198	Q15198	1	1	1	Platelet-derived growth factor receptor-like protein	PDGFRL		1	1	1	1	0	0	0	0	0	0	1	0	0	0	0	0	0	0	0	1	0	0	0	0	0	0	0	0	1	0	0	2.9	2.9	2.9	41.86	375	375	0.0047651	2.3848	0	0	0
Q15233	Q15233	3	2	2	Non-POU domain-containing octamer-binding protein	NONO		1	3	2	2	0	2	0	0	0	0	1	0	0	0	1	0	0	0	0	1	0	0	0	1	0	0	0	0	1	0	0	6.4	4.7	4.7	54.231	471	471	0	6.0514	0	4	0
Q15238;Q00888;Q16557;Q00889;Q9UQ72;Q00887;Q9UQ74	Q15238	8;2;2;2;1;1;1	8;2;2;2;1;1;1	5;0;1;1;0;1;0	Pregnancy-specific beta-1-glycoprotein 5	PSG5		7	8	8	5	7	1	1	5	1	1	5	1	1	7	1	1	5	1	1	5	1	1	4	1	1	3	1	1	3	1	1	20.9	20.9	12.2	37.713	335	335;419;428;435;335;426;426	0	25.338	18.8	3	3
Q15257	Q15257	3	3	3	Serine/threonine-protein phosphatase 2A activator	PPP2R4		1	3	3	3	0	0	0	2	1	0	1	2	0	0	0	0	2	1	0	1	2	0	0	0	0	2	1	0	1	2	0	8.7	8.7	8.7	40.667	358	358	0	6.4014	0	0	0
Q15262	Q15262	12	12	12	Receptor-type tyrosine-protein phosphatase kappa	PTPRK		1	12	12	12	10	5	4	6	6	7	8	6	8	10	5	4	6	6	7	8	6	8	10	5	4	6	6	7	8	6	8	11.2	11.2	11.2	162.1	1439	1439	0	95.99	9.9	4.8	3.9
Q15293	Q15293	13	13	13	Reticulocalbin-1	RCN1		1	13	13	13	8	6	7	7	9	6	11	9	8	8	6	7	7	9	6	11	9	8	8	6	7	7	9	6	11	9	8	36.9	36.9	36.9	38.89	331	331	0	134.38	23.9	18.1	26.3
Q15365	Q15365	6	6	5	Poly(rC)-binding protein 1	PCBP1		1	6	6	5	4	5	4	4	4	4	5	3	4	4	5	4	4	4	4	5	3	4	3	4	3	3	3	3	4	2	3	19.4	19.4	16.3	37.497	356	356	0	54.925	15.2	16.3	15.2
Q15366;P57721	Q15366	5;2	4;1	4;1	Poly(rC)-binding protein 2	PCBP2		2	5	4	4	2	3	2	1	3	4	3	2	4	1	2	1	0	2	3	2	1	3	1	2	1	0	2	3	2	1	3	14.5	11.5	11.5	38.58	365	365;371	0	11.308	6.6	9.6	6.6
Q15369	Q15369	2	2	2	Transcription elongation factor B polypeptide 1	TCEB1		1	2	2	2	1	1	0	0	1	0	1	2	0	1	1	0	0	1	0	1	2	0	1	1	0	0	1	0	1	2	0	20.5	20.5	20.5	12.473	112	112	0	9.1978	11.6	8.9	0
Q15370	Q15370	3	3	3	Transcription elongation factor B polypeptide 2	TCEB2		1	3	3	3	0	2	2	0	3	1	0	2	2	0	2	2	0	3	1	0	2	2	0	2	2	0	3	1	0	2	2	38.1	38.1	38.1	13.133	118	118	0	25.206	0	31.4	31.4
Q15389	Q15389	4	4	4	Angiopoietin-1	ANGPT1		1	4	4	4	1	0	0	0	0	0	3	0	0	1	0	0	0	0	0	3	0	0	1	0	0	0	0	0	3	0	0	8.6	8.6	8.6	57.512	498	498	0	9.2125	2	0	0
Q15398	Q15398	1	1	1	Disks large-associated protein 5	DLGAP5		1	1	1	1	1	0	0	0	1	0	0	1	0	1	0	0	0	1	0	0	1	0	1	0	0	0	1	0	0	1	0	1.3	1.3	1.3	95.114	846	846	1	-2	1.3	0	0
Q15404	Q15404	6	6	6	Ras suppressor protein 1	RSU1		1	6	6	6	4	1	0	1	0	1	3	1	0	4	1	0	1	0	1	3	1	0	4	1	0	1	0	1	3	1	0	19.9	19.9	19.9	31.54	277	277	0	13.573	10.8	5.8	0
Q15417	Q15417	4	4	3	Calponin-3	CNN3		1	4	4	3	3	1	0	1	1	1	1	0	1	3	1	0	1	1	1	1	0	1	2	0	0	1	0	0	0	0	1	10.9	10.9	7.6	36.413	329	329	0	7.7795	10	3.3	0
Q15435	Q15435	2	2	2	Protein phosphatase 1 regulatory subunit 7	PPP1R7		1	2	2	2	0	0	0	0	0	0	1	1	1	0	0	0	0	0	0	1	1	1	0	0	0	0	0	0	1	1	1	6.9	6.9	6.9	41.564	360	360	0.0035868	2.8696	0	0	0
Q15436;Q15437	Q15436;Q15437	3;2	3;2	3;2	Protein transport protein Sec23A;Protein transport protein Sec23B	SEC23A;SEC23B	;	2	3	3	3	1	1	0	0	0	1	2	2	1	1	1	0	0	0	1	2	2	1	1	1	0	0	0	1	2	2	1	4.4	4.4	4.4	86.16	765	765;767	0	10.774	1.6	1.6	0
Q15459	Q15459	1	1	1	Splicing factor 3A subunit 1	SF3A1		1	1	1	1	0	0	0	0	1	0	0	0	0	0	0	0	0	1	0	0	0	0	0	0	0	0	1	0	0	0	0	1.9	1.9	1.9	88.885	793	793	0	4.1221	0	0	0
Q15582	Q15582	31	31	31	Transforming growth factor-beta-induced protein ig-h3	TGFBI		1	31	31	31	24	5	7	22	12	10	20	10	13	24	5	7	22	12	10	20	10	13	24	5	7	22	12	10	20	10	13	39.5	39.5	39.5	74.68	683	683	0	212.38	32.7	7.9	12.9
Q15599	Q15599	3	3	3	Na(+)/H(+) exchange regulatory cofactor NHE-RF2	SLC9A3R2		1	3	3	3	2	1	0	2	1	0	1	0	1	2	1	0	2	1	0	1	0	1	2	1	0	2	1	0	1	0	1	10.4	10.4	10.4	37.413	337	337	0	9.8201	7.7	2.7	0
Q15631	Q15631	2	2	2	Translin	TSN		1	2	2	2	0	0	0	0	1	0	1	0	0	0	0	0	0	1	0	1	0	0	0	0	0	0	1	0	1	0	0	9.6	9.6	9.6	26.183	228	228	0	4.2927	0	0	0
Q15691;Q15555	Q15691	3;1	3;1	3;1	Microtubule-associated protein RP/EB family member 1	MAPRE1		2	3	3	3	1	1	1	2	1	1	1	2	1	1	1	1	2	1	1	1	2	1	1	1	1	2	1	1	1	2	1	9.3	9.3	9.3	29.999	268	268;327	0	5.9238	3	3	3
Q15717;Q12926;P26378	Q15717	5;1;1	5;1;1	5;1;1	ELAV-like protein 1	ELAVL1		3	5	5	5	0	1	1	0	3	1	3	0	1	0	1	1	0	3	1	3	0	1	0	1	1	0	3	1	3	0	1	18.7	18.7	18.7	36.091	326	326;359;380	0	11.752	0	3.4	3.4
Q15746	Q15746	2	2	2	Myosin light chain kinase, smooth muscle;Myosin light chain kinase, smooth muscle, deglutamylated form	MYLK		1	2	2	2	0	0	0	0	0	0	2	1	0	0	0	0	0	0	0	2	1	0	0	0	0	0	0	0	2	1	0	0.8	0.8	0.8	210.71	1914	1914	0.002201	3.2165	0	0	0
Q15751	Q15751	1	1	1	Probable E3 ubiquitin-protein ligase HERC1	HERC1		1	1	1	1	0	0	0	0	0	0	1	0	0	0	0	0	0	0	0	1	0	0	0	0	0	0	0	0	1	0	0	0.4	0.4	0.4	532.22	4861	4861	0.0036206	2.9933	0	0	0
Q15843	Q15843	2	2	2	NEDD8	NEDD8		1	2	2	2	2	0	1	0	1	0	2	0	1	2	0	1	0	1	0	2	0	1	2	0	1	0	1	0	2	0	1	23.5	23.5	23.5	9.0714	81	81	0	21.581	23.5	0	17.3
Q15904	Q15904	4	4	4	V-type proton ATPase subunit S1	ATP6AP1		1	4	4	4	4	4	4	3	4	3	2	3	3	4	4	4	3	4	3	2	3	3	4	4	4	3	4	3	2	3	3	11.3	11.3	11.3	52.025	470	470	0	43.245	11.3	11.3	11.3
Q15907;P62491	Q15907;P62491	4;3	4;3	4;3	Ras-related protein Rab-11B;Ras-related protein Rab-11A	RAB11B;RAB11A	;	2	4	4	4	0	1	1	1	1	1	1	3	2	0	1	1	1	1	1	1	3	2	0	1	1	1	1	1	1	3	2	18.8	18.8	18.8	24.488	218	218;216	0	5.7499	0	5	5
Q15942	Q15942	8	8	8	Zyxin	ZYX		1	8	8	8	2	4	3	4	2	1	4	3	2	2	4	3	4	2	1	4	3	2	2	4	3	4	2	1	4	3	2	17.3	17.3	17.3	61.277	572	572	0	31.788	5.9	8.7	5.8
Q16181;Q6ZU15	Q16181	4;1	4;1	4;1	Septin-7	2007-09-01		2	4	4	4	1	3	3	1	1	2	1	2	0	1	3	3	1	1	2	1	2	0	1	3	3	1	1	2	1	2	0	11.7	11.7	11.7	50.679	437	437;432	0	26.86	2.1	8.9	8.9
Q16204	Q16204	1	1	1	Coiled-coil domain-containing protein 6	CCDC6		1	1	1	1	0	1	0	0	0	0	0	0	0	0	1	0	0	0	0	0	0	0	0	1	0	0	0	0	0	0	0	1.7	1.7	1.7	53.29	474	474	1	-2	0	1.7	0
Q16222;Q3KQV9	Q16222	6;2	6;2	6;2	UDP-N-acetylhexosamine pyrophosphorylase;UDP-N-acetylgalactosamine pyrophosphorylase;UDP-N-acetylglucosamine pyrophosphorylase	UAP1		2	6	6	6	0	2	2	1	4	1	3	4	2	0	2	2	1	4	1	3	4	2	0	2	2	1	4	1	3	4	2	12.3	12.3	12.3	58.768	522	522;507	0	19.526	0	4.2	4.2
Q16270	Q16270	22	22	22	Insulin-like growth factor-binding protein 7	IGFBP7		1	22	22	22	21	13	13	17	14	13	17	12	13	21	13	13	17	14	13	17	12	13	21	13	13	17	14	13	17	12	13	64.5	64.5	64.5	29.13	282	282	0	323.31	64.5	56.7	56.7
Q16363	Q16363	111	111	111	Laminin subunit alpha-4	LAMA4		1	111	111	111	85	54	41	68	54	52	70	55	65	85	54	41	68	54	52	70	55	65	85	54	41	68	54	52	70	55	65	46.6	46.6	46.6	202.52	1823	1823	0	323.31	40.2	28.2	23.3
Q16394;Q92935	Q16394	15;1	15;1	15;1	Exostosin-1	EXT1		2	15	15	15	11	4	3	7	5	5	10	6	5	11	4	3	7	5	5	10	6	5	11	4	3	7	5	5	10	6	5	20.1	20.1	20.1	86.254	746	746;676	0	39.083	18	5.4	5.9
Q16543	Q16543	1	1	1	Hsp90 co-chaperone Cdc37;Hsp90 co-chaperone Cdc37, N-terminally processed	CDC37		1	1	1	1	0	0	1	0	0	0	0	0	0	0	0	1	0	0	0	0	0	0	0	0	1	0	0	0	0	0	0	2.4	2.4	2.4	44.468	378	378	0.002193	3.167	0	0	2.4
Q16555	Q16555	9	9	9	Dihydropyrimidinase-related protein 2	DPYSL2		1	9	9	9	5	4	4	5	5	4	7	5	3	5	4	4	5	5	4	7	5	3	5	4	4	5	5	4	7	5	3	23.6	23.6	23.6	62.293	572	572	0	58.045	14.2	11.4	11.4
Q16576;Q09028	Q16576;Q09028	5;4	5;4	5;4	Histone-binding protein RBBP7;Histone-binding protein RBBP4	RBBP7;RBBP4	;	2	5	5	5	3	2	1	0	0	1	0	2	1	3	2	1	0	0	1	0	2	1	3	2	1	0	0	1	0	2	1	12	12	12	47.82	425	425;425	0	7.9699	3.8	4	2.1
Q16610	Q16610	32	32	32	Extracellular matrix protein 1	ECM1		1	32	32	32	24	20	22	26	24	22	26	21	24	24	20	22	26	24	22	26	21	24	24	20	22	26	24	22	26	21	24	57.8	57.8	57.8	60.673	540	540	0	323.31	55.9	38	43.1
Q16643	Q16643	6	6	6	Drebrin	DBN1		1	6	6	6	2	3	1	1	2	1	4	3	1	2	3	1	1	2	1	4	3	1	2	3	1	1	2	1	4	3	1	14.8	14.8	14.8	71.428	649	649	0	29.045	6.6	8	1.2
Q16658	Q16658	18	18	18	Fascin	FSCN1		1	18	18	18	8	11	10	6	13	8	8	12	13	8	11	10	6	13	8	8	12	13	8	11	10	6	13	8	8	12	13	34.5	34.5	34.5	54.529	493	493	0	167.67	17.8	24.3	22.5
Q16706;P49641	Q16706	8;1	8;1	8;1	Alpha-mannosidase 2	MAN2A1		2	8	8	8	3	2	3	2	2	2	7	2	2	3	2	3	2	2	2	7	2	2	3	2	3	2	2	2	7	2	2	7.1	7.1	7.1	131.14	1144	1144;1150	0	22.547	3.5	1.7	2.7
Q16769	Q16769	10	10	10	Glutaminyl-peptide cyclotransferase	QPCT		1	10	10	10	5	6	4	6	5	8	6	8	7	5	6	4	6	5	8	6	8	7	5	6	4	6	5	8	6	8	7	27.1	27.1	27.1	40.876	361	361	0	117	18.3	18.3	9.4
Q16774	Q16774	2	2	2	Guanylate kinase	GUK1		1	2	2	2	0	1	0	0	0	0	1	1	0	0	1	0	0	0	0	1	1	0	0	1	0	0	0	0	1	1	0	17.3	17.3	17.3	21.725	197	197	0	3.8987	0	11.2	0
Q16775	Q16775	1	1	1	Hydroxyacylglutathione hydrolase, mitochondrial	HAGH		1	1	1	1	1	0	0	0	0	0	0	1	0	1	0	0	0	0	0	0	1	0	1	0	0	0	0	0	0	1	0	3.9	3.9	3.9	33.805	308	308	0.0035014	2.666	3.9	0	0
Q16851	Q16851	9	9	9	UTP--glucose-1-phosphate uridylyltransferase	UGP2		1	9	9	9	2	2	2	2	4	3	6	2	2	2	2	2	2	4	3	6	2	2	2	2	2	2	4	3	6	2	2	16.5	16.5	16.5	56.94	508	508	0	39.439	3.9	4.1	4.1
Q16881;Q9NNW7	Q16881	10;1	10;1	10;1	Thioredoxin reductase 1, cytoplasmic	TXNRD1		2	10	10	10	5	4	2	6	4	3	6	3	3	5	4	2	6	4	3	6	3	3	5	4	2	6	4	3	6	3	3	23.6	23.6	23.6	70.905	649	649;524	0	71.236	10.3	8.9	3.9
Q17RC7	Q17RC7	2	2	2	Exocyst complex component 3-like protein 4	EXOC3L4		1	2	2	2	1	1	1	1	1	1	2	1	1	1	1	1	1	1	1	2	1	1	1	1	1	1	1	1	2	1	1	2.2	2.2	2.2	79.895	722	722	0.0035286	2.7582	1	1	1
Q24JP5	Q24JP5	10	10	10	Transmembrane protein 132A	TMEM132A		1	10	10	10	0	3	1	0	3	3	1	7	3	0	3	1	0	3	3	1	7	3	0	3	1	0	3	3	1	7	3	10.3	10.3	10.3	110.11	1023	1023	0	31.483	0	5.3	1.5
Q29983	Q29983	2	2	2	MHC class I polypeptide-related sequence A	MICA		1	2	2	2	1	0	0	0	1	0	0	0	0	1	0	0	0	1	0	0	0	0	1	0	0	0	1	0	0	0	0	5.2	5.2	5.2	42.915	383	383	0	3.92	2.6	0	0
Q2KJ03	Q2KJ03	1	1	1	Putative uncharacterized protein ZNRD1-AS1	ZNRD1-AS1		1	1	1	1	0	0	0	0	1	0	0	0	0	0	0	0	0	1	0	0	0	0	0	0	0	0	1	0	0	0	0	7	7	7	22.371	187	187	1	-2	0	0	0
Q2TAY7	Q2TAY7	1	1	1	WD40 repeat-containing protein SMU1;WD40 repeat-containing protein SMU1, N-terminally processed	SMU1		1	1	1	1	0	0	0	0	0	0	0	1	0	0	0	0	0	0	0	0	1	0	0	0	0	0	0	0	0	1	0	1.9	1.9	1.9	57.543	513	513	0.0066225	2.1558	0	0	0
Q32P28	Q32P28	15	15	15	Prolyl 3-hydroxylase 1	LEPRE1		1	15	15	15	9	2	4	7	6	3	6	6	5	9	2	4	7	6	3	6	6	5	9	2	4	7	6	3	6	6	5	25.3	25.3	25.3	83.393	736	736	0	86.322	15.1	3.7	5.3
Q495W5	Q495W5	4	4	4	Alpha-(1,3)-fucosyltransferase 11	FUT11		1	4	4	4	1	0	2	1	4	1	1	2	2	1	0	2	1	4	1	1	2	2	1	0	2	1	4	1	1	2	2	12.4	12.4	12.4	55.815	492	492	0	31.772	2	0	3.9
Q4G0F5	Q4G0F5	1	1	1	Vacuolar protein sorting-associated protein 26B	VPS26B		1	1	1	1	0	0	0	0	0	0	0	1	0	0	0	0	0	0	0	0	1	0	0	0	0	0	0	0	0	1	0	3.3	3.3	3.3	39.154	336	336	0.0041379	2.4835	0	0	0
Q4LDE5	Q4LDE5	51	51	51	Sushi, von Willebrand factor type A, EGF and pentraxin domain-containing protein 1	SVEP1		1	51	51	51	42	0	0	24	0	0	27	0	0	42	0	0	24	0	0	27	0	0	42	0	0	24	0	0	27	0	0	16.9	16.9	16.9	390.17	3571	3571	0	182.63	13.8	0	0
Q502W6	Q502W6	1	1	1	von Willebrand factor A domain-containing protein 3B	VWA3B		1	1	1	1	0	0	1	0	0	0	0	0	0	0	0	1	0	0	0	0	0	0	0	0	1	0	0	0	0	0	0	0.6	0.6	0.6	145.75	1294	1294	1	-2	0	0	0.6
Q53FA7	Q53FA7	2	2	2	Quinone oxidoreductase PIG3	TP53I3		1	2	2	2	0	0	0	0	0	0	1	2	0	0	0	0	0	0	0	1	2	0	0	0	0	0	0	0	1	2	0	5.1	5.1	5.1	35.536	332	332	0	4.9361	0	0	0
Q53RD9	Q53RD9	6	6	6	Fibulin-7	FBLN7		1	6	6	6	5	0	0	5	0	0	4	0	0	5	0	0	5	0	0	4	0	0	5	0	0	5	0	0	4	0	0	18	18	18	47.375	439	439	0	30.075	15.3	0	0
Q562R1	Q562R1	11	1	1	Beta-actin-like protein 2	ACTBL2		1	11	1	1	8	7	7	7	6	7	6	8	6	0	0	0	1	0	1	0	0	0	0	0	0	1	0	1	0	0	0	20.7	4.8	4.8	42.003	376	376	0.0034819	2.5965	13.6	13.6	14.1
Q58FF8	Q58FF8	11	1	1	Putative heat shock protein HSP 90-beta 2	HSP90AB2P		1	11	1	1	4	6	7	4	8	8	5	9	6	1	1	1	1	1	1	1	1	1	1	1	1	1	1	1	1	1	1	22.8	3.9	3.9	44.348	381	381	0	71.08	11.5	16.3	17.8
Q5FYB0	Q5FYB0	1	1	1	Arylsulfatase J	ARSJ		1	1	1	1	0	0	0	1	0	0	1	1	0	0	0	0	1	0	0	1	1	0	0	0	0	1	0	0	1	1	0	2	2	2	67.235	599	599	1	-2	0	0	0
Q5JNZ5;P62854	Q5JNZ5;P62854	3;3	3;3	3;3	Putative 40S ribosomal protein S26-like 1;40S ribosomal protein S26	RPS26P11;RPS26	;	2	3	3	3	2	3	3	2	2	1	2	2	1	2	3	3	2	2	1	2	2	1	2	3	3	2	2	1	2	2	1	24.3	24.3	24.3	13.002	115	115;115	0	7.6308	13.9	24.3	24.3
Q5KU26	Q5KU26	5	5	5	Collectin-12	COLEC12		1	5	5	5	4	0	0	2	0	0	3	0	0	4	0	0	2	0	0	3	0	0	4	0	0	2	0	0	3	0	0	7.3	7.3	7.3	81.514	742	742	0	16	5.9	0	0
Q5MCW4	Q5MCW4	1	1	1	Zinc finger protein 569	ZNF569		1	1	1	1	0	1	0	0	0	0	0	0	0	0	1	0	0	0	0	0	0	0	0	1	0	0	0	0	0	0	0	2.2	2.2	2.2	79.582	686	686	1	-2	0	2.2	0
Q5T011	Q5T011	1	1	1	Protein SZT2	SZT2		1	1	1	1	0	1	1	0	0	0	0	0	0	0	1	1	0	0	0	0	0	0	0	1	1	0	0	0	0	0	0	0.3	0.3	0.3	378.02	3432	3432	1	-2	0	0.3	0.3
Q5T1B0	Q5T1B0	1	1	1	Axonemal dynein light chain domain-containing protein 1	AXDND1		1	1	1	1	0	0	0	1	0	0	0	0	0	0	0	0	1	0	0	0	0	0	0	0	0	1	0	0	0	0	0	2	2	2	118.03	1012	1012	0.0047619	2.3806	0	0	0
Q5T4S7	Q5T4S7	2	2	2	E3 ubiquitin-protein ligase UBR4	UBR4		1	2	2	2	0	0	0	0	1	0	0	1	0	0	0	0	0	1	0	0	1	0	0	0	0	0	1	0	0	1	0	0.4	0.4	0.4	573.83	5183	5183	0.0035361	2.7619	0	0	0
Q5T5C0	Q5T5C0	1	1	1	Syntaxin-binding protein 5	STXBP5		1	1	1	1	1	0	0	0	0	0	1	0	1	1	0	0	0	0	0	1	0	1	1	0	0	0	0	0	1	0	1	0.7	0.7	0.7	127.57	1151	1151	0.0035137	2.7051	0.7	0	0
Q5VSY0	Q5VSY0	1	1	1	G kinase-anchoring protein 1	GKAP1		1	1	1	1	0	0	0	0	1	0	0	0	0	0	0	0	0	1	0	0	0	0	0	0	0	0	1	0	0	0	0	3.6	3.6	3.6	42.078	366	366	1	-2	0	0	0
Q5VTE0;P68104;Q05639	Q5VTE0;P68104;Q05639	17;17;9	17;17;9	17;17;9	Putative elongation factor 1-alpha-like 3;Elongation factor 1-alpha 1;Elongation factor 1-alpha 2	EEF1A1P5;EEF1A1;EEF1A2	;;	3	17	17	17	10	14	13	7	14	9	11	13	10	10	14	13	7	14	9	11	13	10	10	14	13	7	14	9	11	13	10	32.3	32.3	32.3	50.184	462	462;462;463	0	140.56	24.2	31.2	26.2
Q5VU97	Q5VU97	4	4	4	VWFA and cache domain-containing protein 1	CACHD1		1	4	4	4	0	0	0	0	0	2	0	0	3	0	0	0	0	0	2	0	0	3	0	0	0	0	0	2	0	0	3	3.5	3.5	3.5	142.29	1274	1274	0	6.3766	0	0	0
Q5VW36	Q5VW36	1	1	1	Focadhesin	FOCAD		1	1	1	1	0	0	1	0	1	0	0	0	0	0	0	1	0	1	0	0	0	0	0	0	1	0	1	0	0	0	0	0.4	0.4	0.4	200.07	1801	1801	1	-2	0	0	0.4
Q5VY09	Q5VY09	1	1	1	Immediate early response gene 5 protein	IER5		1	1	1	1	0	1	0	0	0	0	0	0	0	0	1	0	0	0	0	0	0	0	0	1	0	0	0	0	0	0	0	3.1	3.1	3.1	33.703	327	327	1	-2	0	3.1	0
Q5VYS8	Q5VYS8	1	1	1	Terminal uridylyltransferase 7	ZCCHC6		1	1	1	1	1	0	0	0	0	0	0	0	0	1	0	0	0	0	0	0	0	0	1	0	0	0	0	0	0	0	0	0.7	0.7	0.7	171.23	1495	1495	1	-2	0.7	0	0
Q641Q3	Q641Q3	14	14	14	Meteorin-like protein	METRNL		1	14	14	14	9	6	7	7	9	8	3	8	6	9	6	7	7	9	8	3	8	6	9	6	7	7	9	8	3	8	6	54	54	54	34.398	311	311	0	116.14	36	28.9	26.4
Q66PJ3	Q66PJ3	1	1	1	ADP-ribosylation factor-like protein 6-interacting protein 4	ARL6IP4		1	1	1	1	0	0	0	0	0	0	1	0	0	0	0	0	0	0	0	1	0	0	0	0	0	0	0	0	1	0	0	2.6	2.6	2.6	44.915	421	421	1	-2	0	0	0
Q68BL7	Q68BL7	3	3	3	Olfactomedin-like protein 2A	OLFML2A		1	3	3	3	0	0	0	2	0	0	1	0	0	0	0	0	2	0	0	1	0	0	0	0	0	2	0	0	1	0	0	4.3	4.3	4.3	73.054	652	652	0	4.1581	0	0	0
Q68BL8	Q68BL8	3	3	3	Olfactomedin-like protein 2B	OLFML2B		1	3	3	3	3	0	0	1	0	0	2	0	0	3	0	0	1	0	0	2	0	0	3	0	0	1	0	0	2	0	0	4.7	4.7	4.7	83.998	750	750	0	10.097	4.7	0	0
Q68CZ2	Q68CZ2	1	1	1	Tensin-3	TNS3		1	1	1	1	0	0	0	0	0	0	0	1	0	0	0	0	0	0	0	0	1	0	0	0	0	0	0	0	0	1	0	1.7	1.7	1.7	155.26	1445	1445	0	6.5933	0	0	0
Q69YL0	Q69YL0	1	1	1	Uncharacterized protein NCBP2-AS2	NCBP2-AS2		1	1	1	1	1	0	0	0	0	0	1	0	1	1	0	0	0	0	0	1	0	1	1	0	0	0	0	0	1	0	1	11.1	11.1	11.1	10.89	99	99	0.0053583	2.225	11.1	0	0
Q6BAA4	Q6BAA4	2	2	2	Fc receptor-like B	FCRLB		1	2	2	2	1	0	0	0	0	0	2	0	0	1	0	0	0	0	0	2	0	0	1	0	0	0	0	0	2	0	0	4.7	4.7	4.7	46.903	426	426	0	4.1622	2.3	0	0
Q6DT37	Q6DT37	1	1	1	Serine/threonine-protein kinase MRCK gamma	CDC42BPG		1	1	1	1	0	1	0	0	0	0	0	1	0	0	1	0	0	0	0	0	1	0	0	1	0	0	0	0	0	1	0	0.5	0.5	0.5	172.46	1551	1551	1	-2	0	0.5	0
Q6EEV6;P61956;P55854	Q6EEV6;P61956;P55854	1;1;1	1;1;1	1;1;1	Small ubiquitin-related modifier 4;Small ubiquitin-related modifier 2;Small ubiquitin-related modifier 3	SUMO4;SUMO2;SUMO3	;;	3	1	1	1	1	1	1	1	1	1	1	1	1	1	1	1	1	1	1	1	1	1	1	1	1	1	1	1	1	1	1	12.6	12.6	12.6	10.685	95	95;95;103	0	16.719	12.6	12.6	12.6
Q6EMK4	Q6EMK4	15	15	15	Vasorin	VASN		1	15	15	15	13	11	12	11	14	11	12	14	12	13	11	12	11	14	11	12	14	12	13	11	12	11	14	11	12	14	12	18.3	18.3	18.3	71.712	673	673	0	304.03	16.3	15	15.8
Q6IBS0	Q6IBS0	6	6	5	Twinfilin-2	TWF2		1	6	6	5	4	2	2	2	3	3	2	4	3	4	2	2	2	3	3	2	4	3	3	1	1	1	2	2	1	3	2	24.4	24.4	22.3	39.548	349	349	0	39.964	19.8	5.7	5.7
Q6NW40	Q6NW40	6	6	6	RGM domain family member B	RGMB		1	6	6	6	6	1	1	5	2	0	3	2	1	6	1	1	5	2	0	3	2	1	6	1	1	5	2	0	3	2	1	21.3	21.3	21.3	47.546	437	437	0	72.576	21.3	1.6	1.6
Q6NZI2	Q6NZI2	6	6	6	Polymerase I and transcript release factor	PTRF		1	6	6	6	5	3	0	1	5	2	2	4	2	5	3	0	1	5	2	2	4	2	5	3	0	1	5	2	2	4	2	18.5	18.5	18.5	43.476	390	390	0	37.577	15.9	9.7	0
Q6P179	Q6P179	3	3	3	Endoplasmic reticulum aminopeptidase 2	ERAP2		1	3	3	3	1	0	0	0	2	0	1	1	1	1	0	0	0	2	0	1	1	1	1	0	0	0	2	0	1	1	1	4.7	4.7	4.7	110.46	960	960	0	9.4484	1.4	0	0
Q6PCB0	Q6PCB0	2	2	2	von Willebrand factor A domain-containing protein 1	VWA1		1	2	2	2	1	0	0	2	1	0	1	0	1	1	0	0	2	1	0	1	0	1	1	0	0	2	1	0	1	0	1	6.3	6.3	6.3	46.804	445	445	0	5.9232	4.5	0	0
Q6PCB5	Q6PCB5	1	1	1	Round spermatid basic protein 1-like protein	RSBN1L		1	1	1	1	0	0	0	0	1	0	0	0	0	0	0	0	0	1	0	0	0	0	0	0	0	0	1	0	0	0	0	0.8	0.8	0.8	94.868	846	846	1	-2	0	0	0
Q6UB35	Q6UB35	1	1	1	Monofunctional C1-tetrahydrofolate synthase, mitochondrial	MTHFD1L		1	1	1	1	0	0	0	0	0	0	0	1	0	0	0	0	0	0	0	0	1	0	0	0	0	0	0	0	0	1	0	1.1	1.1	1.1	105.79	978	978	0.0041294	2.4606	0	0	0
Q6UVK1	Q6UVK1	48	48	48	Chondroitin sulfate proteoglycan 4	CSPG4		1	48	48	48	20	14	15	15	17	26	14	18	28	20	14	15	15	17	26	14	18	28	20	14	15	15	17	26	14	18	28	26.8	26.8	26.8	250.53	2322	2322	0	236.72	12.3	8	8.7
Q6UVY6	Q6UVY6	14	14	14	DBH-like monooxygenase protein 1	MOXD1		1	14	14	14	7	8	4	7	8	6	9	11	10	7	8	4	7	8	6	9	11	10	7	8	4	7	8	6	9	11	10	22.5	22.5	22.5	69.652	613	613	0	77.724	12.2	14.4	7.5
Q6UX15	Q6UX15	3	3	3	Layilin	LAYN		1	3	3	3	3	1	0	1	0	1	2	0	1	3	1	0	1	0	1	2	0	1	3	1	0	1	0	1	2	0	1	9.4	9.4	9.4	43.108	382	382	0	12.03	9.4	2.1	0
Q6UX41	Q6UX41	1	1	1	Butyrophilin-like protein 8	BTNL8		1	1	1	1	0	0	0	0	0	0	0	0	1	0	0	0	0	0	0	0	0	1	0	0	0	0	0	0	0	0	1	2.6	2.6	2.6	56.747	500	500	1	-2	0	0	0
Q6UXD5;Q9BYH1	Q6UXD5;Q9BYH1	2;1	2;1	2;1	Seizure 6-like protein 2;Seizure 6-like protein	SEZ6L2;SEZ6L	;	2	2	2	2	0	1	1	1	1	0	0	0	1	0	1	1	1	1	0	0	0	1	0	1	1	1	1	0	0	0	1	1.8	1.8	1.8	97.559	910	910;1024	0.0007622	3.7174	0	1	0.8
Q6UXH9	Q6UXH9	34	34	34	Inactive serine protease PAMR1	PAMR1		1	34	34	34	31	10	11	21	8	12	25	14	12	31	10	11	21	8	12	25	14	12	31	10	11	21	8	12	25	14	12	43.1	43.1	43.1	80.198	720	720	0	323.31	41	13.8	17.4
Q6UXI7	Q6UXI7	14	14	14	Vitrin	VIT		1	14	14	14	7	0	0	7	0	0	8	0	0	7	0	0	7	0	0	8	0	0	7	0	0	7	0	0	8	0	0	23.7	23.7	23.7	73.929	678	678	0	57.572	12.8	0	0
Q6UY14	Q6UY14	1	1	1	ADAMTS-like protein 4	ADAMTSL4		1	1	1	1	0	0	0	0	0	1	0	0	0	0	0	0	0	0	1	0	0	0	0	0	0	0	0	1	0	0	0	1.1	1.1	1.1	116.54	1074	1074	0.0021994	3.1945	0	0	0
Q6VAB6	Q6VAB6	2	2	2	Kinase suppressor of Ras 2	KSR2		1	2	2	2	0	0	0	0	0	0	1	0	1	0	0	0	0	0	0	1	0	1	0	0	0	0	0	0	1	0	1	1.1	1.1	1.1	107.63	950	950	1	-2	0	0	0
Q6YHK3	Q6YHK3	28	28	28	CD109 antigen	CD109		1	28	28	28	18	12	8	17	6	8	18	14	9	18	12	8	17	6	8	18	14	9	18	12	8	17	6	8	18	14	9	19.1	19.1	19.1	161.69	1445	1445	0	106.59	13.4	8.4	6.2
Q6YP21	Q6YP21	1	1	1	Kynurenine--oxoglutarate transaminase 3	CCBL2		1	1	1	1	0	0	0	0	0	0	0	0	1	0	0	0	0	0	0	0	0	1	0	0	0	0	0	0	0	0	1	2.6	2.6	2.6	51.4	454	454	0.005984	2.1771	0	0	0
Q6ZMP0	Q6ZMP0	7	7	7	Thrombospondin type-1 domain-containing protein 4	THSD4		1	7	7	7	0	3	3	1	1	4	0	4	1	0	3	3	1	1	4	0	4	1	0	3	3	1	1	4	0	4	1	8.1	8.1	8.1	112.45	1018	1018	0	23.153	0	3.8	3.8
Q6ZN84	Q6ZN84	1	1	1	Coiled-coil domain-containing protein 81	CCDC81		1	1	1	1	0	1	0	0	0	0	0	0	0	0	1	0	0	0	0	0	0	0	0	1	0	0	0	0	0	0	0	1.1	1.1	1.1	76.083	652	652	1	-2	0	1.1	0
Q6ZNA5	Q6ZNA5	1	1	1	Ferric-chelate reductase 1	FRRS1		1	1	1	1	0	0	0	0	0	1	0	0	0	0	0	0	0	0	1	0	0	0	0	0	0	0	0	1	0	0	0	1.7	1.7	1.7	66.114	592	592	1	-2	0	0	0
Q6ZNF0	Q6ZNF0	8	8	8	Iron/zinc purple acid phosphatase-like protein	PAPL		1	8	8	8	0	1	1	0	3	3	0	6	2	0	1	1	0	3	3	0	6	2	0	1	1	0	3	3	0	6	2	23.1	23.1	23.1	50.479	438	438	0	35.681	0	3.4	3.7
Q6ZRP7	Q6ZRP7	3	3	3	Sulfhydryl oxidase 2	QSOX2		1	3	3	3	3	0	0	2	1	2	1	1	2	3	0	0	2	1	2	1	1	2	3	0	0	2	1	2	1	1	2	5	5	5	77.528	698	698	0	4.9738	5	0	0
Q6ZTQ3	Q6ZTQ3	1	1	1	Ras association domain-containing protein 6	RASSF6		1	1	1	1	0	0	0	0	1	0	0	1	0	0	0	0	0	1	0	0	1	0	0	0	0	0	1	0	0	1	0	1.9	1.9	1.9	43.383	369	369	1	-2	0	0	0
Q702N8	Q702N8	1	1	1	Xin actin-binding repeat-containing protein 1	XIRP1		1	1	1	1	0	0	0	0	0	0	0	1	0	0	0	0	0	0	0	0	1	0	0	0	0	0	0	0	0	1	0	0.4	0.4	0.4	198.56	1843	1843	1	-2	0	0	0
Q71DI3;Q16695;P84243;P68431;Q6NXT2	Q71DI3;Q16695;P84243;P68431;Q6NXT2	3;3;3;3;2	3;3;3;3;2	3;3;3;3;2	Histone H3.2;Histone H3.1t;Histone H3.3;Histone H3.1;Histone H3.3C	HIST2H3A;HIST3H3;H3F3A;HIST1H3A;H3F3C	;;;;	5	3	3	3	1	0	0	1	0	0	1	0	0	1	0	0	1	0	0	1	0	0	1	0	0	1	0	0	1	0	0	19.9	19.9	19.9	15.388	136	136;136;136;136;135	0	4.3701	6.6	0	0
Q71U36;Q9BQE3;Q13748;Q6PEY2;Q9NY65	Q71U36;Q9BQE3;Q13748;Q6PEY2;Q9NY65	17;16;15;12;9	17;16;15;12;9	2;2;2;2;2	Tubulin alpha-1A chain;Tubulin alpha-1C chain;Tubulin alpha-3C/D chain;Tubulin alpha-3E chain;Tubulin alpha-8 chain	TUBA1A;TUBA1C;TUBA3C;TUBA3E;TUBA8	;;;;	5	17	17	2	7	14	10	9	13	10	11	12	11	7	14	10	9	13	10	11	12	11	2	1	2	1	2	2	1	2	2	41	41	3.1	50.135	451	451;449;450;450;449	0	307.29	18.6	39	25.7
Q75N90	Q75N90	2	1	1	Fibrillin-3	FBN3		1	2	1	1	1	1	1	0	0	0	1	0	0	0	1	1	0	0	0	0	0	0	0	1	1	0	0	0	0	0	0	0.9	0.3	0.3	300.35	2809	2809	0.00074906	3.4811	0.6	0.3	0.3
Q76M96	Q76M96	12	12	12	Coiled-coil domain-containing protein 80	CCDC80		1	12	12	12	7	0	2	4	1	3	5	0	1	7	0	2	4	1	3	5	0	1	7	0	2	4	1	3	5	0	1	16.7	16.7	16.7	108.17	950	950	0	31.93	8.6	0	1.8
Q7KZF4	Q7KZF4	18	18	18	Staphylococcal nuclease domain-containing protein 1	SND1		1	18	18	18	2	3	2	2	10	5	5	9	2	2	3	2	2	10	5	5	9	2	2	3	2	2	10	5	5	9	2	23.6	23.6	23.6	102	910	910	0	81.207	2	3.4	1.6
Q7L576;Q96F07	Q7L576;Q96F07	1;1	1;1	1;1	Cytoplasmic FMR1-interacting protein 1;Cytoplasmic FMR1-interacting protein 2	CYFIP1;CYFIP2	;	2	1	1	1	0	0	0	0	0	1	0	1	0	0	0	0	0	0	1	0	1	0	0	0	0	0	0	1	0	1	0	1	1	1	145.18	1253	1253;1278	0.003499	2.6606	0	0	0
Q7LGC8	Q7LGC8	3	3	3	Carbohydrate sulfotransferase 3	CHST3		1	3	3	3	1	0	0	2	1	0	1	0	1	1	0	0	2	1	0	1	0	1	1	0	0	2	1	0	1	0	1	6.1	6.1	6.1	54.705	479	479	0	6.9624	2.7	0	0
Q7Z304	Q7Z304	3	3	3	MAM domain-containing protein 2	MAMDC2		1	3	3	3	2	0	0	1	0	0	1	0	0	2	0	0	1	0	0	1	0	0	2	0	0	1	0	0	1	0	0	5.7	5.7	5.7	77.555	686	686	0	8.7697	3.8	0	0
Q7Z3B1	Q7Z3B1	5	5	5	Neuronal growth regulator 1	NEGR1		1	5	5	5	4	0	0	1	0	0	2	0	0	4	0	0	1	0	0	2	0	0	4	0	0	1	0	0	2	0	0	19.5	19.5	19.5	38.719	354	354	0	14.705	13.6	0	0
Q7Z406	Q7Z406	4	1	1	Myosin-14	MYH14		1	4	1	1	2	3	2	2	2	2	2	3	2	0	1	0	0	0	0	0	0	0	0	1	0	0	0	0	0	0	0	1.5	0.4	0.4	227.87	1995	1995	1	-2	1.1	1.5	1.1
Q7Z4F1	Q7Z4F1	1	1	1	Low-density lipoprotein receptor-related protein 10	LRP10		1	1	1	1	0	1	1	0	1	1	0	1	1	0	1	1	0	1	1	0	1	1	0	1	1	0	1	1	0	1	1	1.3	1.3	1.3	76.193	713	713	0	4.9978	0	1.3	1.3
Q7Z4H9	Q7Z4H9	1	1	1	Protein FAM220A	FAM220A		1	1	1	1	0	1	1	0	0	0	0	0	0	0	1	1	0	0	0	0	0	0	0	1	1	0	0	0	0	0	0	4.6	4.6	4.6	28.021	259	259	0.0053655	2.2536	0	4.6	4.6
Q7Z5L7	Q7Z5L7	18	18	18	Podocan	PODN		1	18	18	18	13	0	0	13	2	0	11	0	0	13	0	0	13	2	0	11	0	0	13	0	0	13	2	0	11	0	0	30.7	30.7	30.7	68.975	613	613	0	73.26	24.6	0	0
Q7Z7G0	Q7Z7G0	2	2	2	Target of Nesh-SH3	ABI3BP		1	2	2	2	0	0	0	2	0	0	0	0	0	0	0	0	2	0	0	0	0	0	0	0	0	2	0	0	0	0	0	1.8	1.8	1.8	118.64	1075	1075	0.0035236	2.7455	0	0	0
Q7Z7M9	Q7Z7M9	8	8	8	Polypeptide N-acetylgalactosaminyltransferase 5	GALNT5		1	8	8	8	7	0	0	3	0	0	4	0	0	7	0	0	3	0	0	4	0	0	7	0	0	3	0	0	4	0	0	10.6	10.6	10.6	106.26	940	940	0	21.418	9.4	0	0
Q86SR1	Q86SR1	13	13	13	Polypeptide N-acetylgalactosaminyltransferase 10	GALNT10		1	13	13	13	11	0	2	3	1	3	5	3	1	11	0	2	3	1	3	5	3	1	11	0	2	3	1	3	5	3	1	23.9	23.9	23.9	68.991	603	603	0	33.226	20.4	0	3.3
Q86UD1	Q86UD1	4	4	4	Out at first protein homolog	OAF		1	4	4	4	4	3	3	3	4	3	3	3	3	4	3	3	3	4	3	3	3	3	4	3	3	3	4	3	3	3	3	20.5	20.5	20.5	30.688	273	273	0	49.411	20.5	10.6	10.6
Q86UP2	Q86UP2	11	11	11	Kinectin	KTN1		1	11	11	11	0	3	4	1	5	3	1	2	6	0	3	4	1	5	3	1	2	6	0	3	4	1	5	3	1	2	6	8.1	8.1	8.1	156.27	1357	1357	0	25.808	0	2.5	3.5
Q86UU0	Q86UU0	1	1	1	B-cell CLL/lymphoma 9-like protein	BCL9L		1	1	1	1	0	0	0	0	1	0	0	0	1	0	0	0	0	1	0	0	0	1	0	0	0	0	1	0	0	0	1	0.8	0.8	0.8	157.13	1499	1499	1	-2	0	0	0
Q86V81	Q86V81	1	1	1	THO complex subunit 4	ALYREF		1	1	1	1	0	0	0	0	1	0	0	0	0	0	0	0	0	1	0	0	0	0	0	0	0	0	1	0	0	0	0	4.3	4.3	4.3	26.888	257	257	0.0066181	2.1533	0	0	0
Q86VP6	Q86VP6	3	3	3	Cullin-associated NEDD8-dissociated protein 1	CAND1		1	3	3	3	1	1	1	0	0	0	0	1	0	1	1	1	0	0	0	0	1	0	1	1	1	0	0	0	0	1	0	2.8	2.8	2.8	136.37	1230	1230	0	9.2577	1.1	1.1	1.1
Q86VZ4	Q86VZ4	1	1	1	Low-density lipoprotein receptor-related protein 11	LRP11		1	1	1	1	0	1	1	1	1	0	1	0	1	0	1	1	1	1	0	1	0	1	0	1	1	1	1	0	1	0	1	2.8	2.8	2.8	53.311	500	500	0	5.0513	0	2.8	2.8
Q86WD7	Q86WD7	2	2	2	Serpin A9	SERPINA9		1	2	2	2	0	0	0	0	0	0	0	2	0	0	0	0	0	0	0	0	2	0	0	0	0	0	0	0	0	2	0	4.6	4.6	4.6	46.556	417	417	0	4.9783	0	0	0
Q86XR8	Q86XR8	1	1	1	Centrosomal protein of 57 kDa	CEP57		1	1	1	1	0	0	0	0	0	0	0	1	0	0	0	0	0	0	0	0	1	0	0	0	0	0	0	0	0	1	0	1.4	1.4	1.4	57.088	500	500	1	-2	0	0	0
Q86XX4	Q86XX4	7	7	7	Extracellular matrix protein FRAS1	FRAS1		1	7	7	7	6	0	0	6	0	0	4	0	0	6	0	0	6	0	0	4	0	0	6	0	0	6	0	0	4	0	0	1.8	1.8	1.8	443.21	4008	4008	0	16.188	1.6	0	0
Q86Y38	Q86Y38	20	20	20	Xylosyltransferase 1	XYLT1		1	20	20	20	7	4	3	7	5	4	7	6	4	7	4	3	7	5	4	7	6	4	7	4	3	7	5	4	7	6	4	22.3	22.3	22.3	107.57	959	959	0	85.049	10.4	3.4	2.9
Q8IUX7	Q8IUX7	35	35	34	Adipocyte enhancer-binding protein 1	AEBP1		1	35	35	34	29	22	17	22	22	23	25	16	23	29	22	17	22	22	23	25	16	23	28	21	16	21	21	22	24	15	22	31	31	31	130.93	1158	1158	0	323.31	29.1	22.5	17.6
Q8IVM0	Q8IVM0	1	1	1	Coiled-coil domain-containing protein 50	CCDC50		1	1	1	1	1	0	0	0	0	0	0	0	0	1	0	0	0	0	0	0	0	0	1	0	0	0	0	0	0	0	0	3.9	3.9	3.9	35.822	306	306	0.0035894	2.8909	3.9	0	0
Q8IWE2	Q8IWE2	3	3	3	Protein NOXP20	FAM114A1		1	3	3	3	1	1	0	0	0	0	0	1	0	1	1	0	0	0	0	0	1	0	1	1	0	0	0	0	0	1	0	6.4	6.4	6.4	60.741	563	563	0	4.1404	1.6	2.5	0
Q8IWU6	Q8IWU6	2	2	2	Extracellular sulfatase Sulf-1	SULF1		1	2	2	2	0	0	0	2	0	0	1	0	0	0	0	0	2	0	0	1	0	0	0	0	0	2	0	0	1	0	0	2	2	2	101.03	871	871	0.0034771	2.5697	0	0	0
Q8IWV8	Q8IWV8	1	1	1	E3 ubiquitin-protein ligase UBR2	UBR2		1	1	1	1	0	0	0	1	0	1	0	1	0	0	0	0	1	0	1	0	1	0	0	0	0	1	0	1	0	1	0	0.6	0.6	0.6	200.54	1755	1755	1	-2	0	0	0
Q8IWX8	Q8IWX8	1	1	1	Calcium homeostasis endoplasmic reticulum protein	CHERP		1	1	1	1	0	1	0	0	0	0	0	0	1	0	1	0	0	0	0	0	0	1	0	1	0	0	0	0	0	0	1	0.8	0.8	0.8	103.7	916	916	1	-2	0	0.8	0
Q8IWY4	Q8IWY4	4	1	1	Signal peptide, CUB and EGF-like domain-containing protein 1	SCUBE1		1	4	1	1	4	3	3	2	3	3	2	3	3	1	0	0	0	0	0	0	0	0	1	0	0	0	0	0	0	0	0	2.4	0.9	0.9	107.91	988	988	1	-2	2.4	1.5	1.5
Q8IX30;Q9NQ36	Q8IX30	35;3	35;3	32;0	Signal peptide, CUB and EGF-like domain-containing protein 3	SCUBE3		2	35	35	32	25	25	23	18	25	26	19	21	26	25	25	23	18	25	26	19	21	26	22	22	20	16	22	23	17	18	23	38.2	38.2	36.7	109.28	993	993;999	0	323.31	31.7	28.9	27.6
Q8IXL6;Q96MK3	Q8IXL6	4;1	4;1	4;1	Extracellular serine/threonine protein kinase FAM20C	FAM20C		2	4	4	4	2	0	0	2	1	0	2	0	1	2	0	0	2	1	0	2	0	1	2	0	0	2	1	0	2	0	1	7.5	7.5	7.5	66.234	584	584;541	0	7.8282	3.4	0	0
Q8IYS5	Q8IYS5	3	3	3	Osteoclast-associated immunoglobulin-like receptor	OSCAR		1	3	3	3	0	1	2	0	2	3	1	1	3	0	1	2	0	2	3	1	1	3	0	1	2	0	2	3	1	1	3	16.3	16.3	16.3	30.481	282	282	0	67.562	0	5.3	8.9
Q8IYW2	Q8IYW2	2	2	2	Cilia- and flagella-associated protein 46	CFAP46		1	2	2	2	1	0	0	0	0	0	1	0	1	1	0	0	0	0	0	1	0	1	1	0	0	0	0	0	1	0	1	0.8	0.8	0.8	303.5	2715	2715	0.0066313	2.1661	0.3	0	0
Q8IZA0	Q8IZA0	2	2	2	Dyslexia-associated protein KIAA0319-like protein	KIAA0319L		1	2	2	2	1	2	2	2	1	1	0	1	1	1	2	2	2	1	1	0	1	1	1	2	2	2	1	1	0	1	1	2.4	2.4	2.4	115.66	1049	1049	0	10.848	1.6	2.4	2.4
Q8N114	Q8N114	2	2	2	Protein shisa-5	SHISA5		1	2	2	2	2	0	0	1	0	0	0	0	0	2	0	0	1	0	0	0	0	0	2	0	0	1	0	0	0	0	0	3.3	3.3	3.3	25.582	240	240	0.0092348	2.1376	3.3	0	0
Q8N2S1	Q8N2S1	10	10	10	Latent-transforming growth factor beta-binding protein 4	LTBP4		1	10	10	10	6	0	0	5	0	1	5	0	1	6	0	0	5	0	1	5	0	1	6	0	0	5	0	1	5	0	1	9.1	9.1	9.1	173.43	1624	1624	0	36.972	5.4	0	0
Q8N3G9	Q8N3G9	1	1	1	Transmembrane protein 130	TMEM130		1	1	1	1	0	0	0	0	1	0	0	0	0	0	0	0	0	1	0	0	0	0	0	0	0	0	1	0	0	0	0	3	3	3	48.329	435	435	0.0041465	2.5153	0	0	0
Q8N436	Q8N436	5	4	4	Inactive carboxypeptidase-like protein X2	CPXM2		1	5	4	4	2	2	1	1	3	1	2	3	2	1	1	0	0	2	0	1	2	1	1	1	0	0	2	0	1	2	1	8.2	7	7	85.869	756	756	0	10.792	3.4	2.8	1.2
Q8N441	Q8N441	3	3	3	Fibroblast growth factor receptor-like 1	FGFRL1		1	3	3	3	0	1	0	0	0	0	0	1	1	0	1	0	0	0	0	0	1	1	0	1	0	0	0	0	0	1	1	8.3	8.3	8.3	54.536	504	504	0	17.447	0	1.8	0
Q8N474	Q8N474	15	15	15	Secreted frizzled-related protein 1	SFRP1		1	15	15	15	13	10	8	9	10	8	9	12	5	13	10	8	9	10	8	9	12	5	13	10	8	9	10	8	9	12	5	40.8	40.8	40.8	35.385	314	314	0	137.39	37.9	28.7	24.5
Q8N4A0	Q8N4A0	5	5	5	Polypeptide N-acetylgalactosaminyltransferase 4	GALNT4		1	5	5	5	0	1	1	0	1	3	1	1	4	0	1	1	0	1	3	1	1	4	0	1	1	0	1	3	1	1	4	11.6	11.6	11.6	66.665	578	578	0	19.666	0	1.4	1.4
Q8N4P2	Q8N4P2	1	1	1	Tetratricopeptide repeat protein 30B	TTC30B		1	1	1	1	0	0	0	0	1	0	0	0	0	0	0	0	0	1	0	0	0	0	0	0	0	0	1	0	0	0	0	1.8	1.8	1.8	76.098	665	665	1	-2	0	0	0
Q8N6G6	Q8N6G6	30	30	30	ADAMTS-like protein 1	ADAMTSL1		1	30	30	30	20	8	3	12	12	7	13	8	9	20	8	3	12	12	7	13	8	9	20	8	3	12	12	7	13	8	9	19.3	19.3	19.3	193.41	1762	1762	0	119.69	13.7	6	2.3
Q8N6Y2	Q8N6Y2	7	7	7	Leucine-rich repeat-containing protein 17	LRRC17		1	7	7	7	0	1	1	0	2	5	0	2	5	0	1	1	0	2	5	0	2	5	0	1	1	0	2	5	0	2	5	15.4	15.4	15.4	51.799	441	441	0	14.246	0	2.3	2.5
Q8N841	Q8N841	1	1	1	Tubulin polyglutamylase TTLL6	TTLL6		1	1	1	1	0	0	0	0	0	0	0	1	0	0	0	0	0	0	0	0	1	0	0	0	0	0	0	0	0	1	0	1.5	1.5	1.5	96.399	843	843	1	-2	0	0	0
Q8N8U9	Q8N8U9	3	3	3	BMP-binding endothelial regulator protein	BMPER		1	3	3	3	1	0	0	0	2	0	0	0	0	1	0	0	0	2	0	0	0	0	1	0	0	0	2	0	0	0	0	5.5	5.5	5.5	75.996	685	685	0	8.3928	2	0	0
Q8N8Z6	Q8N8Z6	7	7	7	Discoidin, CUB and LCCL domain-containing protein 1	DCBLD1		1	7	7	7	1	4	1	2	1	1	2	5	3	1	4	1	2	1	1	2	5	3	1	4	1	2	1	1	2	5	3	13.4	13.4	13.4	77.92	715	715	0	48.184	1.5	7.8	1.7
Q8N9F7	Q8N9F7	1	1	1	Glycerophosphodiester phosphodiesterase domain-containing protein 1	GDPD1		1	1	1	1	0	1	0	0	0	0	0	0	0	0	1	0	0	0	0	0	0	0	0	1	0	0	0	0	0	0	0	2.9	2.9	2.9	36.167	314	314	1	-2	0	2.9	0
Q8NBF2;O43511	Q8NBF2;O43511	1;1	1;1	1;1	NHL repeat-containing protein 2;Pendrin	NHLRC2;SLC26A4	;	2	1	1	1	1	0	0	0	0	0	0	0	0	1	0	0	0	0	0	0	0	0	1	0	0	0	0	0	0	0	0	1	1	1	79.443	726	726;780	1	-2	1	0	0
Q8NBJ4	Q8NBJ4	2	2	2	Golgi membrane protein 1	GOLM1		1	2	2	2	1	0	0	1	0	0	1	0	0	1	0	0	1	0	0	1	0	0	1	0	0	1	0	0	1	0	0	4.2	4.2	4.2	45.333	401	401	0	6.2843	2.5	0	0
Q8NBJ5	Q8NBJ5	6	6	6	Procollagen galactosyltransferase 1	COLGALT1		1	6	6	6	1	2	2	2	2	5	2	1	1	1	2	2	2	2	5	2	1	1	1	2	2	2	2	5	2	1	1	10.9	10.9	10.9	71.635	622	622	0	8.9998	1.3	2.9	2.9
Q8NBJ7	Q8NBJ7	8	8	8	Sulfatase-modifying factor 2	SUMF2		1	8	8	8	4	0	2	1	5	5	3	3	4	4	0	2	1	5	5	3	3	4	4	0	2	1	5	5	3	3	4	30.2	30.2	30.2	33.843	301	301	0	37.573	17.3	0	10.3
Q8NBK3	Q8NBK3	2	2	2	Sulfatase-modifying factor 1	SUMF1		1	2	2	2	0	1	2	1	1	0	2	2	1	0	1	2	1	1	0	2	2	1	0	1	2	1	1	0	2	2	1	7.5	7.5	7.5	40.556	374	374	0	12.981	0	4	7.5
Q8NBS9	Q8NBS9	15	15	15	Thioredoxin domain-containing protein 5	TXNDC5		1	15	15	15	9	3	3	5	3	5	9	2	4	9	3	3	5	3	5	9	2	4	9	3	3	5	3	5	9	2	4	32.4	32.4	32.4	47.628	432	432	0	88.537	17.6	8.1	6.7
Q8NBZ7	Q8NBZ7	5	5	5	UDP-glucuronic acid decarboxylase 1	UXS1		1	5	5	5	1	1	0	0	3	0	1	1	1	1	1	0	0	3	0	1	1	1	1	1	0	0	3	0	1	1	1	20.2	20.2	20.2	47.576	420	420	0	23.03	4	7.6	0
Q8NC51	Q8NC51	3	3	3	Plasminogen activator inhibitor 1 RNA-binding protein	SERBP1		1	3	3	3	1	2	2	0	1	2	0	2	0	1	2	2	0	1	2	0	2	0	1	2	2	0	1	2	0	2	0	7.4	7.4	7.4	44.965	408	408	0	6.1406	2.9	4.4	4.4
Q8NCC3	Q8NCC3	1	1	1	Group XV phospholipase A2	PLA2G15		1	1	1	1	0	0	0	1	0	1	0	0	1	0	0	0	1	0	1	0	0	1	0	0	0	1	0	1	0	0	1	2.7	2.7	2.7	46.657	412	412	0.0035386	2.7744	0	0	0
Q8NCH0	Q8NCH0	6	6	6	Carbohydrate sulfotransferase 14	CHST14		1	6	6	6	5	0	0	3	0	2	5	2	0	5	0	0	3	0	2	5	2	0	5	0	0	3	0	2	5	2	0	16	16	16	42.996	376	376	0	12.589	13.8	0	0
Q8NCL4;Q14435	Q8NCL4	11;1	11;1	11;1	Polypeptide N-acetylgalactosaminyltransferase 6	GALNT6		2	11	11	11	4	3	4	6	5	7	7	5	8	4	3	4	6	5	7	7	5	8	4	3	4	6	5	7	7	5	8	22	22	22	71.158	622	622;633	0	59.817	9.3	5.8	7.6
Q8NDC0	Q8NDC0	1	1	1	MAPK-interacting and spindle-stabilizing protein-like	MAPK1IP1L		1	1	1	1	0	0	0	0	1	1	0	1	0	0	0	0	0	1	1	0	1	0	0	0	0	0	1	1	0	1	0	6.9	6.9	6.9	24.269	245	245	0	9.1258	0	0	0
Q8NDV3	Q8NDV3	1	1	1	Structural maintenance of chromosomes protein 1B	SMC1B		1	1	1	1	0	1	0	0	0	0	0	0	0	0	1	0	0	0	0	0	0	0	0	1	0	0	0	0	0	0	0	0.8	0.8	0.8	143.91	1235	1235	1	-2	0	0.8	0
Q8NES3	Q8NES3	2	2	2	Beta-1,3-N-acetylglucosaminyltransferase lunatic fringe	LFNG		1	2	2	2	0	1	0	0	1	0	0	1	2	0	1	0	0	1	0	0	1	2	0	1	0	0	1	0	0	1	2	4.7	4.7	4.7	41.773	379	379	0	4.1648	0	2.9	0
Q8NFY4	Q8NFY4	1	1	1	Semaphorin-6D	SEMA6D		1	1	1	1	0	0	0	0	0	0	0	1	0	0	0	0	0	0	0	0	1	0	0	0	0	0	0	0	0	1	0	1.5	1.5	1.5	119.87	1073	1073	0.0047265	2.323	0	0	0
Q8NG06	Q8NG06	1	1	1	E3 ubiquitin-protein ligase TRIM58	TRIM58		1	1	1	1	0	1	0	0	1	0	0	0	0	0	1	0	0	1	0	0	0	0	0	1	0	0	1	0	0	0	0	1.9	1.9	1.9	54.766	486	486	1	-2	0	1.9	0
Q8NHP8	Q8NHP8	3	3	3	Putative phospholipase B-like 2;Putative phospholipase B-like 2 32 kDa form;Putative phospholipase B-like 2 45 kDa form	PLBD2		1	3	3	3	0	1	2	0	1	2	1	1	3	0	1	2	0	1	2	1	1	3	0	1	2	0	1	2	1	1	3	5.4	5.4	5.4	65.471	589	589	0	11.019	0	2.2	4.2
Q8NI22	Q8NI22	2	2	2	Multiple coagulation factor deficiency protein 2	MCFD2		1	2	2	2	2	2	1	0	1	0	1	2	0	2	2	1	0	1	0	1	2	0	2	2	1	0	1	0	1	2	0	32.9	32.9	32.9	16.39	146	146	0	87.323	32.9	32.9	8.9
Q8TAD7	Q8TAD7	2	2	2	Overexpressed in colon carcinoma 1 protein	OCC1		1	2	2	2	2	0	0	0	0	0	0	0	0	2	0	0	0	0	0	0	0	0	2	0	0	0	0	0	0	0	0	54	54	54	6.4069	63	63	0	10.054	54	0	0
Q8TAV0	Q8TAV0	1	1	1	Protein FAM76A	FAM76A		1	1	1	1	0	0	1	0	0	0	0	1	0	0	0	1	0	0	0	0	1	0	0	0	1	0	0	0	0	1	0	3.9	3.9	3.9	35.049	307	307	1	-2	0	0	3.9
Q8TCT8	Q8TCT8	2	2	2	Signal peptide peptidase-like 2A	SPPL2A		1	2	2	2	1	0	0	0	1	0	1	1	0	1	0	0	0	1	0	1	1	0	1	0	0	0	1	0	1	1	0	4.4	4.4	4.4	58.143	520	520	0.0021914	3.136	1.7	0	0
Q8TD16	Q8TD16	1	1	1	Protein bicaudal D homolog 2	BICD2		1	1	1	1	0	0	0	1	1	1	1	1	1	0	0	0	1	1	1	1	1	1	0	0	0	1	1	1	1	1	1	1.5	1.5	1.5	93.532	824	824	0.0035112	2.7029	0	0	0
Q8TER0	Q8TER0	3	3	3	Sushi, nidogen and EGF-like domain-containing protein 1	SNED1		1	3	3	3	1	0	1	2	1	2	1	0	3	1	0	1	2	1	2	1	0	3	1	0	1	2	1	2	1	0	3	2	2	2	152.2	1413	1413	0	7.9018	0.6	0	0.6
Q8TF61	Q8TF61	1	1	1	F-box only protein 41	FBXO41		1	1	1	1	0	1	0	0	0	0	1	0	1	0	1	0	0	0	0	1	0	1	0	1	0	0	0	0	1	0	1	0.8	0.8	0.8	94.495	875	875	1	-2	0	0.8	0
Q8TF76	Q8TF76	1	1	1	Serine/threonine-protein kinase haspin	GSG2		1	1	1	1	0	0	0	1	0	0	0	0	0	0	0	0	1	0	0	0	0	0	0	0	0	1	0	0	0	0	0	1.1	1.1	1.1	88.494	798	798	1	-2	0	0	0
Q8WUJ3	Q8WUJ3	32	32	32	Cell migration-inducing and hyaluronan-binding protein	CEMIP		1	32	32	32	9	20	3	6	11	10	8	19	20	9	20	3	6	11	10	8	19	20	9	20	3	6	11	10	8	19	20	27.7	27.7	27.7	153	1361	1361	0	118.15	9.5	17.9	2.4
Q8WUM4	Q8WUM4	22	22	22	Programmed cell death 6-interacting protein	PDCD6IP		1	22	22	22	9	7	6	7	11	7	8	11	9	9	7	6	7	11	7	8	11	9	9	7	6	7	11	7	8	11	9	25.5	25.5	25.5	96.022	868	868	0	81.997	11.9	7.9	8.2
Q8WV24	Q8WV24	1	1	1	Pleckstrin homology-like domain family A member 1	PHLDA1		1	1	1	1	0	1	0	0	1	0	0	1	1	0	1	0	0	1	0	0	1	1	0	1	0	0	1	0	0	1	1	2.5	2.5	2.5	45.016	401	401	0.0035817	2.8673	0	2.5	0
Q8WVN6	Q8WVN6	3	3	3	Secreted and transmembrane protein 1	SECTM1		1	3	3	3	3	0	0	2	1	0	2	1	2	3	0	0	2	1	0	2	1	2	3	0	0	2	1	0	2	1	2	14.9	14.9	14.9	27.039	248	248	0	26.913	14.9	0	0
Q8WVQ1	Q8WVQ1	17	17	17	Soluble calcium-activated nucleotidase 1	CANT1		1	17	17	17	10	2	1	11	7	7	10	6	3	10	2	1	11	7	7	10	6	3	10	2	1	11	7	7	10	6	3	46.1	46.1	46.1	44.839	401	401	0	79.965	29.7	7	4
Q8WWX9	Q8WWX9	1	1	1	Selenoprotein M	SELM		1	1	1	1	1	0	0	1	0	0	1	0	0	1	0	0	1	0	0	1	0	0	1	0	0	1	0	0	1	0	0	9.7	9.7	9.7	16.231	145	145	0	6.2549	9.7	0	0
Q8WYB5	Q8WYB5	1	1	1	Histone acetyltransferase KAT6B	KAT6B		1	1	1	1	0	1	0	0	1	1	0	1	1	0	1	0	0	1	1	0	1	1	0	1	0	0	1	1	0	1	1	0.7	0.7	0.7	231.38	2073	2073	0.0035842	2.8675	0	0.7	0
Q8WZ42	Q8WZ42	5	5	5	Titin	TTN		1	5	5	5	1	1	1	1	2	0	1	1	1	1	1	1	1	2	0	1	1	1	1	1	1	1	2	0	1	1	1	0.1	0.1	0.1	3816	34350	34350	0	4.6062	0	0	0
Q92520	Q92520	10	10	10	Protein FAM3C	FAM3C		1	10	10	10	5	5	3	1	4	3	2	6	4	5	5	3	1	4	3	2	6	4	5	5	3	1	4	3	2	6	4	38.8	38.8	38.8	24.68	227	227	0	54.836	25.6	26	15
Q92598;O95757	Q92598	19;2	19;2	17;1	Heat shock protein 105 kDa	HSPH1		2	19	19	17	2	8	9	5	8	9	7	13	9	2	8	9	5	8	9	7	13	9	1	7	8	3	8	7	5	11	7	27	27	24.5	96.864	858	858;839	0	79.237	3.1	11.3	14.2
Q92626	Q92626	66	66	66	Peroxidasin homolog	PXDN		1	66	66	66	55	23	23	44	28	32	44	26	28	55	23	23	44	28	32	44	26	28	55	23	23	44	28	32	44	26	28	45.4	45.4	45.4	165.27	1479	1479	0	323.31	41	21	19.5
Q92636	Q92636	1	1	1	Protein FAN	NSMAF		1	1	1	1	1	1	1	1	1	1	0	1	1	1	1	1	1	1	1	0	1	1	1	1	1	1	1	1	0	1	1	1.4	1.4	1.4	104.37	917	917	0.00075758	3.6022	1.4	1.4	1.4
Q92688	Q92688	3	1	1	Acidic leucine-rich nuclear phosphoprotein 32 family member B	ANP32B		1	3	1	1	0	2	2	0	2	2	1	1	1	0	1	1	0	0	1	0	0	0	0	1	1	0	0	1	0	0	0	14.3	5.2	5.2	28.787	251	251	0.00074129	3.394	0	8	8
Q92692	Q92692	3	3	3	Nectin-2	PVRL2		1	3	3	3	0	0	0	0	2	1	2	2	2	0	0	0	0	2	1	2	2	2	0	0	0	0	2	1	2	2	2	8	8	8	57.741	538	538	0	6.1648	0	0	0
Q92729	Q92729	1	1	1	Receptor-type tyrosine-protein phosphatase U	PTPRU		1	1	1	1	0	0	0	0	0	0	0	1	0	0	0	0	0	0	0	0	1	0	0	0	0	0	0	0	0	1	0	0.8	0.8	0.8	162.42	1446	1446	0.00074239	3.4083	0	0	0
Q92734	Q92734	1	1	1	Protein TFG	TFG		1	1	1	1	0	0	0	0	1	0	0	0	0	0	0	0	0	1	0	0	0	0	0	0	0	0	1	0	0	0	0	4.2	4.2	4.2	43.447	400	400	0	5.7081	0	0	0
Q92743	Q92743	20	20	20	Serine protease HTRA1	HTRA1		1	20	20	20	12	11	8	11	10	9	13	12	9	12	11	8	11	10	9	13	12	9	12	11	8	11	10	9	13	12	9	41	41	41	51.286	480	480	0	175.23	22.7	23.8	17.3
Q92747	Q92747	3	3	3	Actin-related protein 2/3 complex subunit 1A	ARPC1A		1	3	3	3	1	0	0	0	1	1	1	0	1	1	0	0	0	1	1	1	0	1	1	0	0	0	1	1	1	0	1	11.1	11.1	11.1	41.569	370	370	0	11.509	2.7	0	0
Q92783	Q92783	2	2	2	Signal transducing adapter molecule 1	STAM		1	2	2	2	0	0	0	0	0	0	0	2	0	0	0	0	0	0	0	0	2	0	0	0	0	0	0	0	0	2	0	4.8	4.8	4.8	59.179	540	540	0	9.8466	0	0	0
Q92804	Q92804	2	1	1	TATA-binding protein-associated factor 2N	TAF15		1	2	1	1	0	1	0	0	2	0	1	1	0	0	1	0	0	1	0	0	0	0	0	1	0	0	1	0	0	0	0	2.9	2.9	2.9	61.829	592	592	0.0047554	2.3727	0	2.9	0
Q92820	Q92820	13	13	13	Gamma-glutamyl hydrolase	GGH		1	13	13	13	9	2	4	6	3	3	11	6	3	9	2	4	6	3	3	11	6	3	9	2	4	6	3	3	11	6	3	34.9	34.9	34.9	35.964	318	318	0	62.432	28	8.8	14.5
Q92823	Q92823	11	11	11	Neuronal cell adhesion molecule	NRCAM		1	11	11	11	0	4	3	0	6	5	0	4	9	0	4	3	0	6	5	0	4	9	0	4	3	0	6	5	0	4	9	10.4	10.4	10.4	143.89	1304	1304	0	59.926	0	4.5	3.1
Q92859	Q92859	2	2	2	Neogenin	NEO1		1	2	2	2	0	0	0	1	0	0	1	0	1	0	0	0	1	0	0	1	0	1	0	0	0	1	0	0	1	0	1	1.3	1.3	1.3	160.01	1461	1461	0	4.8793	0	0	0
Q92882	Q92882	3	3	3	Osteoclast-stimulating factor 1	OSTF1		1	3	3	3	0	1	1	0	0	1	1	1	1	0	1	1	0	0	1	1	1	1	0	1	1	0	0	1	1	1	1	21	21	21	23.787	214	214	0	6.1073	0	3.7	3.7
Q92896	Q92896	18	18	18	Golgi apparatus protein 1	GLG1		1	18	18	18	6	2	1	4	5	5	1	3	4	6	2	1	4	5	5	1	3	4	6	2	1	4	5	5	1	3	4	15.4	15.4	15.4	134.55	1179	1179	0	51.934	6.4	1.3	0.6
Q92905	Q92905	3	3	3	COP9 signalosome complex subunit 5	COPS5		1	3	3	3	0	1	0	0	1	0	0	2	0	0	1	0	0	1	0	0	2	0	0	1	0	0	1	0	0	2	0	9.6	9.6	9.6	37.578	334	334	0	3.7937	0	2.1	0
Q92922	Q92922	1	1	1	SWI/SNF complex subunit SMARCC1	SMARCC1		1	1	1	1	1	0	0	0	0	0	0	0	0	1	0	0	0	0	0	0	0	0	1	0	0	0	0	0	0	0	0	0.8	0.8	0.8	122.87	1105	1105	1	-2	0.8	0	0
Q92945	Q92945	6	6	4	Far upstream element-binding protein 2	KHSRP		1	6	6	4	1	3	1	0	4	1	4	1	1	1	3	1	0	4	1	4	1	1	0	2	1	0	4	1	3	0	1	8.3	8.3	6	73.114	711	711	0	11.344	2.3	4.9	1.5
Q93063	Q93063	23	23	23	Exostosin-2	EXT2		1	23	23	23	15	5	4	13	4	5	13	4	5	15	5	4	13	4	5	13	4	5	15	5	4	13	4	5	13	4	5	35.5	35.5	35.5	82.254	718	718	0	89.846	25.8	6.4	5.4
Q969H8	Q969H8	6	6	6	Myeloid-derived growth factor	MYDGF		1	6	6	6	6	4	2	4	4	5	5	5	3	6	4	2	4	4	5	5	5	3	6	4	2	4	4	5	5	5	3	32.9	32.9	32.9	18.795	173	173	0	101.11	32.9	20.8	15
Q969P0	Q969P0	2	2	2	Immunoglobulin superfamily member 8	IGSF8		1	2	2	2	0	0	0	0	0	0	0	1	1	0	0	0	0	0	0	0	1	1	0	0	0	0	0	0	0	1	1	4.2	4.2	4.2	65.033	613	613	0	6.18	0	0	0
Q969Q0;P83881	Q969Q0;P83881	2;2	2;2	2;2	60S ribosomal protein L36a-like;60S ribosomal protein L36a	RPL36AL;RPL36A	;	2	2	2	2	0	2	1	0	1	0	0	1	1	0	2	1	0	1	0	0	1	1	0	2	1	0	1	0	0	1	1	16	16	16	12.469	106	106;106	0	5.2076	0	16	8.5
Q96A49	Q96A49	1	1	1	Synapse-associated protein 1	SYAP1		1	1	1	1	0	0	0	0	1	0	0	0	0	0	0	0	0	1	0	0	0	0	0	0	0	0	1	0	0	0	0	2.8	2.8	2.8	39.933	352	352	1	-2	0	0	0
Q96AC1;Q9BQL6	Q96AC1	3;1	3;1	3;1	Fermitin family homolog 2	FERMT2		2	3	3	3	1	0	1	0	1	1	2	1	2	1	0	1	0	1	1	2	1	2	1	0	1	0	1	1	2	1	2	5	5	5	77.86	680	680;677	0	15.748	1.5	0	2.1
Q96AG4	Q96AG4	3	3	3	Leucine-rich repeat-containing protein 59	LRRC59		1	3	3	3	0	2	1	0	0	1	1	1	2	0	2	1	0	0	1	1	1	2	0	2	1	0	0	1	1	1	2	13.4	13.4	13.4	34.93	307	307	0	12.275	0	9.1	3.9
Q96AY3	Q96AY3	20	20	20	Peptidyl-prolyl cis-trans isomerase FKBP10	FKBP10		1	20	20	20	14	7	6	9	3	4	7	3	4	14	7	6	9	3	4	7	3	4	14	7	6	9	3	4	7	3	4	37.6	37.6	37.6	64.244	582	582	0	77.133	29.9	16.8	12.7
Q96B97	Q96B97	4	4	4	SH3 domain-containing kinase-binding protein 1	SH3KBP1		1	4	4	4	0	1	1	0	1	1	0	4	0	0	1	1	0	1	1	0	4	0	0	1	1	0	1	1	0	4	0	7.8	7.8	7.8	73.125	665	665	0	11.972	0	2.1	2.1
Q96C90	Q96C90	1	1	1	Protein phosphatase 1 regulatory subunit 14B	PPP1R14B		1	1	1	1	0	1	1	0	1	1	1	0	0	0	1	1	0	1	1	1	0	0	0	1	1	0	1	1	1	0	0	17	17	17	15.911	147	147	0	28.19	0	17	17
Q96CG8	Q96CG8	6	6	6	Collagen triple helix repeat-containing protein 1	CTHRC1		1	6	6	6	4	4	5	4	3	5	4	3	3	4	4	5	4	3	5	4	3	3	4	4	5	4	3	5	4	3	3	24.3	24.3	24.3	26.224	243	243	0	23.087	14.8	16	21
Q96CT7	Q96CT7	1	1	1	Coiled-coil domain-containing protein 124	CCDC124		1	1	1	1	0	1	0	1	0	0	1	0	0	0	1	0	1	0	0	1	0	0	0	1	0	1	0	0	1	0	0	4.5	4.5	4.5	25.835	223	223	0.0035063	2.6736	0	4.5	0
Q96CW1	Q96CW1	2	2	2	AP-2 complex subunit mu	AP2M1		1	2	2	2	1	1	1	0	1	0	1	1	1	1	1	1	0	1	0	1	1	1	1	1	1	0	1	0	1	1	1	4.1	4.1	4.1	49.654	435	435	0.0014782	3.3517	2.1	2.1	2.1
Q96CX2;Q68DU8	Q96CX2	6;1	6;1	6;1	BTB/POZ domain-containing protein KCTD12	KCTD12		2	6	6	6	0	4	2	0	3	2	0	4	3	0	4	2	0	3	2	0	4	3	0	4	2	0	3	2	0	4	3	21.2	21.2	21.2	35.7	325	325;428	0	17.561	0	13.2	7.1
Q96D15	Q96D15	13	13	13	Reticulocalbin-3	RCN3		1	13	13	13	9	8	5	6	5	7	10	9	5	9	8	5	6	5	7	10	9	5	9	8	5	6	5	7	10	9	5	53	53	53	37.493	328	328	0	186.5	38.1	29.9	20.4
Q96DZ1	Q96DZ1	3	3	3	Endoplasmic reticulum lectin 1	ERLEC1		1	3	3	3	0	0	1	0	1	1	0	1	2	0	0	1	0	1	1	0	1	2	0	0	1	0	1	1	0	1	2	6.4	6.4	6.4	54.858	483	483	0	4.6912	0	0	2.1
Q96FE7	Q96FE7	1	1	1	Phosphoinositide-3-kinase-interacting protein 1	PIK3IP1		1	1	1	1	0	0	0	0	0	0	1	0	0	0	0	0	0	0	0	1	0	0	0	0	0	0	0	0	1	0	0	5.7	5.7	5.7	28.248	263	263	0	7.544	0	0	0
Q96FQ6	Q96FQ6	3	3	3	Protein S100-A16	S100A16		1	3	3	3	2	1	2	1	2	1	1	1	1	2	1	2	1	2	1	1	1	1	2	1	2	1	2	1	1	1	1	33	33	33	11.801	103	103	0	6.0788	21.4	10.7	22.3
Q96FW1	Q96FW1	5	5	5	Ubiquitin thioesterase OTUB1	OTUB1		1	5	5	5	1	4	1	0	2	3	3	3	2	1	4	1	0	2	3	3	3	2	1	4	1	0	2	3	3	3	2	22.1	22.1	22.1	31.284	271	271	0	14.156	5.5	18.5	5.5
Q96HC4	Q96HC4	7	7	7	PDZ and LIM domain protein 5	PDLIM5		1	7	7	7	6	0	0	2	2	0	3	4	1	6	0	0	2	2	0	3	4	1	6	0	0	2	2	0	3	4	1	15.9	15.9	15.9	63.944	596	596	0	21.699	12.9	0	0
Q96HE7	Q96HE7	2	2	2	ERO1-like protein alpha	ERO1L		1	2	2	2	0	0	1	0	1	1	0	0	1	0	0	1	0	1	1	0	0	1	0	0	1	0	1	1	0	0	1	3.2	3.2	3.2	54.392	468	468	0.0041012	2.4101	0	0	1.7
Q96I82	Q96I82	3	3	3	Kazal-type serine protease inhibitor domain-containing protein 1	KAZALD1		1	3	3	3	3	0	0	1	0	0	1	0	0	3	0	0	1	0	0	1	0	0	3	0	0	1	0	0	1	0	0	19.1	19.1	19.1	32.945	304	304	0	22.483	19.1	0	0
Q96IU4	Q96IU4	3	3	3	Alpha/beta hydrolase domain-containing protein 14B	ABHD14B		1	3	3	3	1	1	0	0	0	0	2	0	0	1	1	0	0	0	0	2	0	0	1	1	0	0	0	0	2	0	0	20	20	20	22.345	210	210	0	4.0976	10.5	4.8	0
Q96J42	Q96J42	2	2	2	Thioredoxin domain-containing protein 15	TXNDC15		1	2	2	2	1	1	1	0	2	2	2	2	1	1	1	1	0	2	2	2	2	1	1	1	1	0	2	2	2	2	1	9.7	9.7	9.7	39.885	360	360	0	12.463	3.9	3.9	3.9
Q96J84	Q96J84	1	1	1	Kin of IRRE-like protein 1	KIRREL		1	1	1	1	1	0	0	0	0	0	0	0	0	1	0	0	0	0	0	0	0	0	1	0	0	0	0	0	0	0	0	1.8	1.8	1.8	83.535	757	757	0	4.3668	1.8	0	0
Q96JB6	Q96JB6	5	5	5	Lysyl oxidase homolog 4	LOXL4		1	5	5	5	3	1	0	3	5	1	3	3	1	3	1	0	3	5	1	3	3	1	3	1	0	3	5	1	3	3	1	8.3	8.3	8.3	84.483	756	756	0	22.689	5.3	2.1	0
Q96JY6	Q96JY6	1	1	1	PDZ and LIM domain protein 2	PDLIM2		1	1	1	1	0	0	0	1	0	0	1	0	0	0	0	0	1	0	0	1	0	0	0	0	0	1	0	0	1	0	0	3.1	3.1	3.1	37.458	352	352	0.0035663	2.8289	0	0	0
Q96KP4	Q96KP4	6	6	6	Cytosolic non-specific dipeptidase	CNDP2		1	6	6	6	3	2	0	4	1	4	5	4	3	3	2	0	4	1	4	5	4	3	3	2	0	4	1	4	5	4	3	17.9	17.9	17.9	52.878	475	475	0	27.324	7.2	4.4	0
Q96L96	Q96L96	1	1	1	Alpha-protein kinase 3	ALPK3		1	1	1	1	1	0	0	0	1	0	0	1	0	1	0	0	0	1	0	0	1	0	1	0	0	0	1	0	0	1	0	0.7	0.7	0.7	201.27	1907	1907	0.0035689	2.8308	0.7	0	0
Q96LB8	Q96LB8	1	1	1	Peptidoglycan recognition protein 4	PGLYRP4		1	1	1	1	0	0	0	0	0	0	0	0	1	0	0	0	0	0	0	0	0	1	0	0	0	0	0	0	0	0	1	2.7	2.7	2.7	40.62	373	373	0	5.6499	0	0	0
Q96ME1	Q96ME1	1	1	1	F-box/LRR-repeat protein 18	FBXL18		1	1	1	1	1	0	0	0	0	0	0	1	0	1	0	0	0	0	0	0	1	0	1	0	0	0	0	0	0	1	0	1.1	1.1	1.1	88.34	805	805	1	-2	1.1	0	0
Q96NL8	Q96NL8	1	1	1	Protein C8orf37	C8orf37		1	1	1	1	0	0	0	0	0	1	0	0	0	0	0	0	0	0	1	0	0	0	0	0	0	0	0	1	0	0	0	9.7	9.7	9.7	23.38	207	207	1	-2	0	0	0
Q96PD2	Q96PD2	9	9	9	Discoidin, CUB and LCCL domain-containing protein 2	DCBLD2		1	9	9	9	4	8	7	2	6	6	4	7	6	4	8	7	2	6	6	4	7	6	4	8	7	2	6	6	4	7	6	13.7	13.7	13.7	85.034	775	775	0	120.83	5.3	12.3	12
Q96PD6	Q96PD6	1	1	1	2-acylglycerol O-acyltransferase 1	MOGAT1		1	1	1	1	0	0	0	1	1	1	0	0	0	0	0	0	1	1	1	0	0	0	0	0	0	1	1	1	0	0	0	3.9	3.9	3.9	38.812	335	335	0.0053369	2.1899	0	0	0
Q96QD8	Q96QD8	1	1	1	Sodium-coupled neutral amino acid transporter 2	SLC38A2		1	1	1	1	0	0	0	1	0	0	1	0	0	0	0	0	1	0	0	1	0	0	0	0	0	1	0	0	1	0	0	4.3	4.3	4.3	56.025	506	506	0.0066357	2.17	0	0	0
Q96QK1	Q96QK1	2	2	2	Vacuolar protein sorting-associated protein 35	VPS35		1	2	2	2	0	0	0	0	0	1	1	0	0	0	0	0	0	0	1	1	0	0	0	0	0	0	0	1	1	0	0	2.5	2.5	2.5	91.706	796	796	0.00075988	3.6444	0	0	0
Q96RP7	Q96RP7	1	1	1	Galactose-3-O-sulfotransferase 4	GAL3ST4		1	1	1	1	1	0	0	0	0	0	1	0	0	1	0	0	0	0	0	1	0	0	1	0	0	0	0	0	1	0	0	2.5	2.5	2.5	54.165	486	486	0.0053548	2.2207	2.5	0	0
Q96RW7	Q96RW7	4	4	4	Hemicentin-1	HMCN1		1	4	4	4	0	0	0	1	2	2	1	1	0	0	0	0	1	2	2	1	1	0	0	0	0	1	2	2	1	1	0	0.7	0.7	0.7	613.38	5635	5635	0	6.6489	0	0	0
Q96TA1	Q96TA1	8	8	8	Niban-like protein 1	FAM129B		1	8	8	8	2	2	2	3	6	3	2	5	3	2	2	2	3	6	3	2	5	3	2	2	2	3	6	3	2	5	3	13.5	13.5	13.5	84.137	746	746	0	51.077	3.9	3.4	3.4
Q99436	Q99436	2	2	2	Proteasome subunit beta type-7	PSMB7		1	2	2	2	2	1	0	0	1	1	1	1	1	2	1	0	0	1	1	1	1	1	2	1	0	0	1	1	1	1	1	8.3	8.3	8.3	29.965	277	277	0	4.4596	8.3	5.1	0
Q99439	Q99439	2	1	1	Calponin-2	CNN2		1	2	1	1	1	2	0	0	1	1	1	0	0	0	1	0	0	0	0	0	0	0	0	1	0	0	0	0	0	0	0	7.1	3.6	3.6	33.697	309	309	0.0047684	2.3856	3.6	7.1	0
Q99497	Q99497	17	17	17	Protein deglycase DJ-1	PARK7		1	17	17	17	9	7	9	5	8	8	8	8	6	9	7	9	5	8	8	8	8	6	9	7	9	5	8	8	8	8	6	73	73	73	19.891	189	189	0	53.925	64.6	34.9	47.6
Q99519	Q99519	3	3	3	Sialidase-1	NEU1		1	3	3	3	0	1	0	0	1	1	0	1	2	0	1	0	0	1	1	0	1	2	0	1	0	0	1	1	0	1	2	8.9	8.9	8.9	45.467	415	415	0	5.6777	0	2.7	0
Q99536	Q99536	2	2	2	Synaptic vesicle membrane protein VAT-1 homolog	VAT1		1	2	2	2	1	0	0	0	0	0	1	1	0	1	0	0	0	0	0	1	1	0	1	0	0	0	0	0	1	1	0	5.9	5.9	5.9	41.92	393	393	0.00075301	3.5436	3.1	0	0
Q99538	Q99538	3	3	3	Legumain	LGMN		1	3	3	3	3	0	1	1	0	0	1	0	1	3	0	1	1	0	0	1	0	1	3	0	1	1	0	0	1	0	1	5.5	5.5	5.5	49.411	433	433	0	7.0725	5.5	0	2.5
Q99542	Q99542	13	13	13	Matrix metalloproteinase-19	MMP19		1	13	13	13	4	8	5	5	10	8	4	11	9	4	8	5	5	10	8	4	11	9	4	8	5	5	10	8	4	11	9	34.4	34.4	34.4	57.356	508	508	0	140.4	11.8	24.2	13.8
Q99584	Q99584	6	6	6	Protein S100-A13	S100A13		1	6	6	6	6	4	3	0	3	3	2	3	3	6	4	3	0	3	3	2	3	3	6	4	3	0	3	3	2	3	3	49	49	49	11.471	98	98	0	29.397	49	38.8	31.6
Q99613;B5ME19	Q99613;B5ME19	4;4	4;4	4;4	Eukaryotic translation initiation factor 3 subunit C;Eukaryotic translation initiation factor 3 subunit C-like protein	EIF3C;EIF3CL	;	2	4	4	4	0	1	0	0	3	2	2	4	2	0	1	0	0	3	2	2	4	2	0	1	0	0	3	2	2	4	2	3.5	3.5	3.5	105.34	913	913;914	0	15.046	0	1.1	0
Q99650	Q99650	3	3	3	Oncostatin-M-specific receptor subunit beta	OSMR		1	3	3	3	0	0	0	0	0	1	1	1	2	0	0	0	0	0	1	1	1	2	0	0	0	0	0	1	1	1	2	3.8	3.8	3.8	110.51	979	979	0	9.7207	0	0	0
Q99715	Q99715	142	142	142	Collagen alpha-1(XII) chain	COL12A1		1	142	142	142	119	57	67	89	62	71	95	62	85	119	57	67	89	62	71	95	62	85	119	57	67	89	62	71	95	62	85	39.2	39.2	39.2	333.14	3063	3063	0	323.31	35.2	20.9	23.4
Q99719	Q99719	1	1	1	Septin-5	2005-09-01		1	1	1	1	0	0	1	0	0	0	0	0	0	0	0	1	0	0	0	0	0	0	0	0	1	0	0	0	0	0	0	1.9	1.9	1.9	42.777	369	369	1	-2	0	0	1.9
Q99729	Q99729	3	3	3	Heterogeneous nuclear ribonucleoprotein A/B	HNRNPAB		1	3	3	3	2	0	1	0	0	0	1	1	1	2	0	1	0	0	0	1	1	1	2	0	1	0	0	0	1	1	1	9.6	9.6	9.6	36.224	332	332	0	4.119	6.6	0	3
Q99733	Q99733	4	2	2	Nucleosome assembly protein 1-like 4	NAP1L4		1	4	2	2	0	2	1	0	3	1	3	2	2	0	0	0	0	1	1	2	2	1	0	0	0	0	1	1	2	2	1	8	5.1	5.1	42.823	375	375	0	4.8819	0	2.9	2.9
Q99832	Q99832	8	8	8	T-complex protein 1 subunit eta	CCT7		1	8	8	8	4	3	3	1	3	3	4	4	3	4	3	3	1	3	3	4	4	3	4	3	3	1	3	3	4	4	3	14	14	14	59.366	543	543	0	19.625	6.6	6.3	4.8
Q99878;Q96KK5;Q71UI9;P0C0S5;Q9BTM1;Q16777;Q93077;Q7L7L0;Q6FI13;P20671;P0C0S8;P04908;Q96QV6;P16104;Q8IUE6	Q99878;Q96KK5;Q71UI9;P0C0S5;Q9BTM1;Q16777;Q93077;Q7L7L0;Q6FI13;P20671;P0C0S8;P04908;Q96QV6;P16104;Q8IUE6	2;2;2;2;2;2;2;2;2;2;2;2;2;2;1	2;2;2;2;2;2;2;2;2;2;2;2;2;2;1	2;2;2;2;2;2;2;2;2;2;2;2;2;2;1	Histone H2A type 1-J;Histone H2A type 1-H;Histone H2A.V;Histone H2A.Z;Histone H2A.J;Histone H2A type 2-C;Histone H2A type 1-C;Histone H2A type 3;Histone H2A type 2-A;Histone H2A type 1-D;Histone H2A type 1;Histone H2A type 1-B/E;Histone H2A type 1-A;Histone H2AX;Histone H2A type 2-B	HIST1H2AJ;HIST1H2AH;H2AFV;H2AFZ;H2AFJ;HIST2H2AC;HIST1H2AC;HIST3H2A;HIST2H2AA3;HIST1H2AD;HIST1H2AG;HIST1H2AB;HIST1H2AA;H2AFX;HIST2H2AB	;;;;;;;;;;;;;;	15	2	2	2	1	0	0	0	1	0	0	1	0	1	0	0	0	1	0	0	1	0	1	0	0	0	1	0	0	1	0	12.5	12.5	12.5	13.936	128	128;128;128;128;129;129;130;130;130;130;130;130;131;143;130	0	5.1327	5.5	0	0
Q99983	Q99983	1	1	1	Osteomodulin	OMD		1	1	1	1	0	0	0	0	0	0	0	1	0	0	0	0	0	0	0	0	1	0	0	0	0	0	0	0	0	1	0	3.3	3.3	3.3	49.492	421	421	1	-2	0	0	0
Q99985	Q99985	5	4	4	Semaphorin-3C	SEMA3C		1	5	4	4	1	3	3	1	3	3	2	2	2	0	2	2	0	2	2	1	1	1	0	2	2	0	2	2	1	1	1	7.5	6	6	85.206	751	751	0	12.092	1.5	4.3	4.9
Q99988	Q99988	11	11	11	Growth/differentiation factor 15	GDF15		1	11	11	11	0	4	4	1	4	5	1	6	5	0	4	4	1	4	5	1	6	5	0	4	4	1	4	5	1	6	5	43.8	43.8	43.8	34.14	308	308	0	71.292	0	14.9	14.6
Q9BPX5	Q9BPX5	1	1	1	Actin-related protein 2/3 complex subunit 5-like protein	ARPC5L		1	1	1	1	0	0	0	0	1	1	1	1	1	0	0	0	0	1	1	1	1	1	0	0	0	0	1	1	1	1	1	7.8	7.8	7.8	16.941	153	153	0.0035613	2.812	0	0	0
Q9BPZ7	Q9BPZ7	1	1	1	Target of rapamycin complex 2 subunit MAPKAP1	MAPKAP1		1	1	1	1	0	0	0	0	0	0	1	0	0	0	0	0	0	0	0	1	0	0	0	0	0	0	0	0	1	0	0	1.9	1.9	1.9	59.122	522	522	1	-2	0	0	0
Q9BQ51	Q9BQ51	4	4	4	Programmed cell death 1 ligand 2	PDCD1LG2		1	4	4	4	2	1	0	3	1	1	3	1	0	2	1	0	3	1	1	3	1	0	2	1	0	3	1	1	3	1	0	16.1	16.1	16.1	30.957	273	273	0	14.431	8.4	4.4	0
Q9BQT9	Q9BQT9	7	7	7	Calsyntenin-3	CLSTN3		1	7	7	7	6	1	0	3	2	1	5	1	2	6	1	0	3	2	1	5	1	2	6	1	0	3	2	1	5	1	2	9.3	9.3	9.3	106.1	956	956	0	29.54	7.9	1.9	0
Q9BR76	Q9BR76	6	6	6	Coronin-1B	CORO1B		1	6	6	6	3	3	1	1	3	4	5	4	2	3	3	1	1	3	4	5	4	2	3	3	1	1	3	4	5	4	2	13.9	13.9	13.9	54.234	489	489	0	24.991	7.2	7.4	1.6
Q9BRA2	Q9BRA2	6	6	6	Thioredoxin domain-containing protein 17	TXNDC17		1	6	6	6	3	4	4	1	3	2	3	4	3	3	4	4	1	3	2	3	4	3	3	4	4	1	3	2	3	4	3	57.7	57.7	57.7	13.941	123	123	0	27.496	26.8	38.2	38.2
Q9BRF8	Q9BRF8	2	2	2	Serine/threonine-protein phosphatase CPPED1	CPPED1		1	2	2	2	1	0	0	0	1	0	0	0	1	1	0	0	0	1	0	0	0	1	1	0	0	0	1	0	0	0	1	6.4	6.4	6.4	35.548	314	314	0	5.2467	3.5	0	0
Q9BRK3	Q9BRK3	26	26	26	Matrix-remodeling-associated protein 8	MXRA8		1	26	26	26	20	15	15	17	17	18	17	17	16	20	15	15	17	17	18	17	17	16	20	15	15	17	17	18	17	17	16	47.1	47.1	47.1	49.131	442	442	0	315.72	42.5	31.7	25.8
Q9BRK5	Q9BRK5	20	20	20	45 kDa calcium-binding protein	SDF4		1	20	20	20	17	13	8	11	10	7	10	13	9	17	13	8	11	10	7	10	13	9	17	13	8	11	10	7	10	13	9	39	39	39	41.806	362	362	0	278.25	33.7	31.8	22.7
Q9BS26	Q9BS26	10	10	10	Endoplasmic reticulum resident protein 44	ERP44		1	10	10	10	6	5	2	5	3	3	4	5	4	6	5	2	5	3	3	4	5	4	6	5	2	5	3	3	4	5	4	28.6	28.6	28.6	46.971	406	406	0	41.878	15	16.7	4.2
Q9BS40	Q9BS40	1	1	1	Latexin	LXN		1	1	1	1	0	1	0	0	1	0	1	0	0	0	1	0	0	1	0	1	0	0	0	1	0	0	1	0	1	0	0	4.1	4.1	4.1	25.75	222	222	0.0053405	2.1995	0	4.1	0
Q9BSJ8	Q9BSJ8	2	2	2	Extended synaptotagmin-1	ESYT1		1	2	2	2	0	0	0	0	1	0	1	0	0	0	0	0	0	1	0	1	0	0	0	0	0	0	1	0	1	0	0	2.4	2.4	2.4	122.85	1104	1104	0	4.2948	0	0	0
Q9BT09	Q9BT09	2	2	2	Protein canopy homolog 3	CNPY3		1	2	2	2	0	0	0	0	0	1	1	0	0	0	0	0	0	0	1	1	0	0	0	0	0	0	0	1	1	0	0	6.8	6.8	6.8	30.748	278	278	0.0085865	2.1446	0	0	0
Q9BTE1	Q9BTE1	1	1	1	Dynactin subunit 5	DCTN5		1	1	1	1	0	0	1	0	0	0	0	0	0	0	0	1	0	0	0	0	0	0	0	0	1	0	0	0	0	0	0	4.9	4.9	4.9	20.126	182	182	1	-2	0	0	4.9
Q9BTY2	Q9BTY2	7	7	7	Plasma alpha-L-fucosidase	FUCA2		1	7	7	7	5	2	4	3	4	5	6	6	4	5	2	4	3	4	5	6	6	4	5	2	4	3	4	5	6	6	4	15.8	15.8	15.8	54.066	467	467	0	26.39	9.6	4.5	10.3
Q9BU40	Q9BU40	5	5	5	Chordin-like protein 1	CHRDL1		1	5	5	5	4	0	0	1	0	0	2	0	0	4	0	0	1	0	0	2	0	0	4	0	0	1	0	0	2	0	0	10.2	10.2	10.2	51.167	450	450	0	8.0932	10	0	0
Q9BUD6	Q9BUD6	5	5	5	Spondin-2	SPON2		1	5	5	5	1	2	3	0	2	2	1	5	3	1	2	3	0	2	2	1	5	3	1	2	3	0	2	2	1	5	3	13.9	13.9	13.9	35.846	331	331	0	11.174	2.7	4.8	7.3
Q9BUF5	Q9BUF5	7	1	1	Tubulin beta-6 chain	TUBB6		1	7	1	1	5	4	3	2	3	3	3	3	3	0	1	0	0	0	0	0	0	1	0	1	0	0	0	0	0	0	1	15.7	2.7	2.7	49.857	446	446	0.0007446	3.4346	10.8	7.4	7.8
Q9BV57	Q9BV57	5	5	5	1,2-dihydroxy-3-keto-5-methylthiopentene dioxygenase	ADI1		1	5	5	5	2	2	0	1	4	1	2	1	3	2	2	0	1	4	1	2	1	3	2	2	0	1	4	1	2	1	3	35.2	35.2	35.2	21.498	179	179	0	14.742	15.6	19.6	0
Q9BW91	Q9BW91	3	3	3	ADP-ribose pyrophosphatase, mitochondrial	NUDT9		1	3	3	3	0	1	1	0	0	1	2	3	1	0	1	1	0	0	1	2	3	1	0	1	1	0	0	1	2	3	1	9.4	9.4	9.4	39.125	350	350	0	9.1514	0	3.1	3.1
Q9BWD1	Q9BWD1	3	3	3	Acetyl-CoA acetyltransferase, cytosolic	ACAT2		1	3	3	3	1	0	0	1	0	0	2	0	1	1	0	0	1	0	0	2	0	1	1	0	0	1	0	0	2	0	1	10.3	10.3	10.3	41.35	397	397	0	6.179	2.5	0	0
Q9BWS9	Q9BWS9	9	9	9	Chitinase domain-containing protein 1	CHID1		1	9	9	9	7	4	2	3	6	5	4	7	6	7	4	2	3	6	5	4	7	6	7	4	2	3	6	5	4	7	6	30	30	30	44.94	393	393	0	66.418	23.4	12.2	4.6
Q9BWV2	Q9BWV2	1	1	1	Spermatogenesis-associated protein 9	SPATA9		1	1	1	1	0	0	0	1	0	0	0	0	0	0	0	0	1	0	0	0	0	0	0	0	0	1	0	0	0	0	0	3.9	3.9	3.9	28.74	254	254	1	-2	0	0	0
Q9BWW7	Q9BWW7	1	1	1	Transcriptional repressor scratch 1	SCRT1		1	1	1	1	0	1	1	0	1	0	0	0	0	0	1	1	0	1	0	0	0	0	0	1	1	0	1	0	0	0	0	2.6	2.6	2.6	35.57	348	348	0.0053908	2.3011	0	2.6	2.6
Q9BX82	Q9BX82	1	1	1	Zinc finger protein 471	ZNF471		1	1	1	1	0	1	1	0	0	0	0	0	0	0	1	1	0	0	0	0	0	0	0	1	1	0	0	0	0	0	0	1.1	1.1	1.1	73.008	626	626	1	-2	0	1.1	1.1
Q9BXJ1	Q9BXJ1	1	1	1	Complement C1q tumor necrosis factor-related protein 1	C1QTNF1		1	1	1	1	1	1	0	1	0	1	1	1	1	1	1	0	1	0	1	1	1	1	1	1	0	1	0	1	1	1	1	3.6	3.6	3.6	31.742	281	281	0	8.5697	3.6	3.6	0
Q9BXX0	Q9BXX0	15	15	15	EMILIN-2	EMILIN2		1	15	15	15	10	0	0	6	1	1	11	0	0	10	0	0	6	1	1	11	0	0	10	0	0	6	1	1	11	0	0	16.7	16.7	16.7	115.69	1053	1053	0	78.126	12	0	0
Q9BY32	Q9BY32	3	3	3	Inosine triphosphate pyrophosphatase	ITPA		1	3	3	3	0	2	1	0	3	1	0	2	2	0	2	1	0	3	1	0	2	2	0	2	1	0	3	1	0	2	2	17	17	17	21.445	194	194	0	6.2076	0	12.9	4.6
Q9BY44	Q9BY44	3	3	3	Eukaryotic translation initiation factor 2A;Eukaryotic translation initiation factor 2A, N-terminally processed	EIF2A		1	3	3	3	0	2	1	0	1	1	2	1	2	0	2	1	0	1	1	2	1	2	0	2	1	0	1	1	2	1	2	4.8	4.8	4.8	64.989	585	585	0	5.5	0	3.2	1.7
Q9BY76	Q9BY76	17	17	17	Angiopoietin-related protein 4	ANGPTL4		1	17	17	17	2	13	12	4	14	12	4	15	11	2	13	12	4	14	12	4	15	11	2	13	12	4	14	12	4	15	11	37.9	37.9	37.9	45.214	406	406	0	323.31	7.4	37.4	28.6
Q9BYC5	Q9BYC5	4	4	4	Alpha-(1,6)-fucosyltransferase	FUT8		1	4	4	4	0	1	0	0	2	2	0	1	2	0	1	0	0	2	2	0	1	2	0	1	0	0	2	2	0	1	2	9.4	9.4	9.4	66.515	575	575	0	10.842	0	1.9	0
Q9BYN0	Q9BYN0	1	1	1	Sulfiredoxin-1	SRXN1		1	1	1	1	0	1	1	0	1	0	0	1	0	0	1	1	0	1	0	0	1	0	0	1	1	0	1	0	0	1	0	7.3	7.3	7.3	14.259	137	137	0.00074683	3.4577	0	7.3	7.3
Q9BZF3	Q9BZF3	1	1	1	Oxysterol-binding protein-related protein 6	OSBPL6		1	1	1	1	0	0	1	0	0	0	0	0	0	0	0	1	0	0	0	0	0	0	0	0	1	0	0	0	0	0	0	1.5	1.5	1.5	106.3	934	934	1	-2	0	0	1.5
Q9BZM5;Q5VY80;Q6H3X3	Q9BZM5	5;2;2	5;2;2	5;2;2	NKG2D ligand 2	ULBP2		3	5	5	5	1	3	3	1	4	5	1	3	4	1	3	3	1	4	5	1	3	4	1	3	3	1	4	5	1	3	4	20.3	20.3	20.3	27.368	246	246;246;334	0	63.966	4.5	12.6	15.9
Q9BZZ5	Q9BZZ5	1	1	1	Apoptosis inhibitor 5	API5		1	1	1	1	0	0	0	0	1	0	0	1	0	0	0	0	0	1	0	0	1	0	0	0	0	0	1	0	0	1	0	2.1	2.1	2.1	59.004	524	524	0.0092227	2.1292	0	0	0
Q9C037	Q9C037	1	1	1	E3 ubiquitin-protein ligase TRIM4	TRIM4		1	1	1	1	1	0	1	0	0	0	0	0	0	1	0	1	0	0	0	0	0	0	1	0	1	0	0	0	0	0	0	2.2	2.2	2.2	57.46	500	500	1	-2	2.2	0	2.2
Q9C0C2	Q9C0C2	3	3	3	182 kDa tankyrase-1-binding protein	TNKS1BP1		1	3	3	3	0	0	0	0	1	0	0	2	0	0	0	0	0	1	0	0	2	0	0	0	0	0	1	0	0	2	0	2.6	2.6	2.6	181.79	1729	1729	0	8.6368	0	0	0
Q9C0C4	Q9C0C4	5	5	5	Semaphorin-4C	SEMA4C		1	5	5	5	0	0	0	0	1	2	0	0	2	0	0	0	0	1	2	0	0	2	0	0	0	0	1	2	0	0	2	6	6	6	92.622	833	833	0	4.1674	0	0	0
Q9GZQ8;A6NCE7	Q9GZQ8;A6NCE7	2;2	2;2	2;2	Microtubule-associated proteins 1A/1B light chain 3B;Microtubule-associated proteins 1A/1B light chain 3 beta 2	MAP1LC3B;MAP1LC3B2	;	2	2	2	2	1	2	1	0	2	1	1	2	0	1	2	1	0	2	1	1	2	0	1	2	1	0	2	1	1	2	0	19.2	19.2	19.2	14.688	125	125;125	0	6.2016	8	19.2	8
Q9GZX5	Q9GZX5	1	1	1	Zinc finger protein 350	ZNF350		1	1	1	1	0	0	0	1	0	0	0	0	0	0	0	0	1	0	0	0	0	0	0	0	0	1	0	0	0	0	0	1.5	1.5	1.5	60.011	532	532	1	-2	0	0	0
Q9GZX9	Q9GZX9	3	3	3	Twisted gastrulation protein homolog 1	TWSG1		1	3	3	3	3	1	1	2	1	2	2	2	1	3	1	1	2	1	2	2	2	1	3	1	1	2	1	2	2	2	1	20.2	20.2	20.2	25.017	223	223	0	43.053	20.2	6.7	6.7
Q9H013	Q9H013	11	11	11	Disintegrin and metalloproteinase domain-containing protein 19	ADAM19		1	11	11	11	3	9	7	3	7	10	2	6	9	3	9	7	3	7	10	2	6	9	3	9	7	3	7	10	2	6	9	13.2	13.2	13.2	105	955	955	0	252.76	3.6	11	7.4
Q9H0N0	Q9H0N0	1	1	1	Ras-related protein Rab-6C	RAB6C		1	1	1	1	1	0	1	1	1	1	1	0	1	1	0	1	1	1	1	1	0	1	1	0	1	1	1	1	1	0	1	4.3	4.3	4.3	28.355	254	254	1	-2	4.3	0	4.3
Q9H0V9	Q9H0V9	1	1	1	VIP36-like protein	LMAN2L		1	1	1	1	0	1	0	0	1	1	0	0	0	0	1	0	0	1	1	0	0	0	0	1	0	0	1	1	0	0	0	2.3	2.3	2.3	39.71	348	348	0.0047425	2.35	0	2.3	0
Q9H173	Q9H173	8	8	8	Nucleotide exchange factor SIL1	SIL1		1	8	8	8	5	5	3	4	5	3	5	5	3	5	5	3	4	5	3	5	5	3	5	5	3	4	5	3	5	5	3	14.8	14.8	14.8	52.084	461	461	0	102.27	7.4	8.9	7.2
Q9H1B7	Q9H1B7	1	1	1	Interferon regulatory factor 2-binding protein-like	IRF2BPL		1	1	1	1	0	0	0	0	1	0	0	0	0	0	0	0	0	1	0	0	0	0	0	0	0	0	1	0	0	0	0	1.5	1.5	1.5	82.658	796	796	1	-2	0	0	0
Q9H1E3	Q9H1E3	1	1	1	Nuclear ubiquitous casein and cyclin-dependent kinase substrate 1	NUCKS1		1	1	1	1	0	1	0	0	0	0	0	0	0	0	1	0	0	0	0	0	0	0	0	1	0	0	0	0	0	0	0	3.7	3.7	3.7	27.296	243	243	0.0053262	2.1887	0	3.7	0
Q9H1J7	Q9H1J7	7	5	5	Protein Wnt-5b	WNT5B		1	7	5	5	4	3	3	2	4	2	1	4	2	2	2	2	2	3	2	1	3	1	2	2	2	2	3	2	1	3	1	20.9	15	15	40.323	359	359	0	20.887	11.1	9.2	11.4
Q9H270	Q9H270	1	1	1	Vacuolar protein sorting-associated protein 11 homolog	VPS11		1	1	1	1	0	0	0	0	0	1	0	0	0	0	0	0	0	0	1	0	0	0	0	0	0	0	0	1	0	0	0	1.5	1.5	1.5	107.84	941	941	0.0053619	2.226	0	0	0
Q9H299	Q9H299	8	8	8	SH3 domain-binding glutamic acid-rich-like protein 3	SH3BGRL3		1	8	8	8	5	6	5	3	4	3	6	5	4	5	6	5	3	4	3	6	5	4	5	6	5	3	4	3	6	5	4	52.7	52.7	52.7	10.438	93	93	0	146.14	44.1	44.1	52.7
Q9H2X3	Q9H2X3	2	2	2	C-type lectin domain family 4 member M	CLEC4M		1	2	2	2	0	0	0	0	0	0	0	2	0	0	0	0	0	0	0	0	2	0	0	0	0	0	0	0	0	2	0	5.8	5.8	5.8	45.35	399	399	1	-2	0	0	0
Q9H3K6	Q9H3K6	4	4	4	BolA-like protein 2	BOLA2		1	4	4	4	1	2	0	0	2	0	3	1	1	1	2	0	0	2	0	3	1	1	1	2	0	0	2	0	3	1	1	61.6	61.6	61.6	10.116	86	86	0	17.949	22.1	29.1	0
Q9H3P7	Q9H3P7	1	1	1	Golgi resident protein GCP60	ACBD3		1	1	1	1	0	0	0	0	1	1	0	1	1	0	0	0	0	1	1	0	1	1	0	0	0	0	1	1	0	1	1	1.7	1.7	1.7	60.593	528	528	0.0047716	2.3898	0	0	0
Q9H3Z7	Q9H3Z7	1	1	1	Abhydrolase domain-containing protein 16B	ABHD16B		1	1	1	1	0	0	0	1	0	1	0	1	1	0	0	0	1	0	1	0	1	1	0	0	0	1	0	1	0	1	1	2.6	2.6	2.6	52.554	469	469	0.0041436	2.4915	0	0	0
Q9H444	Q9H444	1	1	1	Charged multivesicular body protein 4b	CHMP4B		1	1	1	1	1	0	0	1	1	1	1	0	0	1	0	0	1	1	1	1	0	0	1	0	0	1	1	1	1	0	0	6.2	6.2	6.2	24.95	224	224	0	10.01	6.2	0	0
Q9H461	Q9H461	2	2	2	Frizzled-8	FZD8		1	2	2	2	0	0	0	0	1	0	0	1	2	0	0	0	0	1	0	0	1	2	0	0	0	0	1	0	0	1	2	3.2	3.2	3.2	73.299	694	694	0	5.4243	0	0	0
Q9H488	Q9H488	1	1	1	GDP-fucose protein O-fucosyltransferase 1	POFUT1		1	1	1	1	1	0	0	1	0	0	1	0	0	1	0	0	1	0	0	1	0	0	1	0	0	1	0	0	1	0	0	4.1	4.1	4.1	43.955	388	388	0	4.0745	4.1	0	0
Q9H4A4	Q9H4A4	3	3	3	Aminopeptidase B	RNPEP		1	3	3	3	0	0	0	1	1	0	2	1	2	0	0	0	1	1	0	2	1	2	0	0	0	1	1	0	2	1	2	5.1	5.1	5.1	72.595	650	650	0	6.8715	0	0	0
Q9H4F8	Q9H4F8	3	3	3	SPARC-related modular calcium-binding protein 1	SMOC1		1	3	3	3	0	1	1	0	1	1	0	1	3	0	1	1	0	1	1	0	1	3	0	1	1	0	1	1	0	1	3	7.8	7.8	7.8	48.162	434	434	0	6.8806	0	1.8	1.8
Q9H4M9;Q9NZN3	Q9H4M9;Q9NZN3	3;3	2;2	2;2	EH domain-containing protein 1;EH domain-containing protein 3	EHD1;EHD3	;	2	3	2	2	0	2	2	0	1	0	2	1	2	0	1	1	0	1	0	1	1	1	0	1	1	0	1	0	1	1	1	3.9	2.2	2.2	60.626	534	534;535	0	7.3733	0	3.7	3.7
Q9H5V8	Q9H5V8	13	13	13	CUB domain-containing protein 1	CDCP1		1	13	13	13	3	6	3	1	7	4	3	9	5	3	6	3	1	7	4	3	9	5	3	6	3	1	7	4	3	9	5	14.1	14.1	14.1	92.931	836	836	0	41.815	3.6	7.7	3
Q9H6B4	Q9H6B4	4	4	4	CXADR-like membrane protein	CLMP		1	4	4	4	2	2	3	2	4	3	2	3	1	2	2	3	2	4	3	2	3	1	2	2	3	2	4	3	2	3	1	15	15	15	41.28	373	373	0	10.256	4.6	4.6	7
Q9H772	Q9H772	2	1	1	Gremlin-2	GREM2		1	2	1	1	2	2	2	1	2	1	1	2	1	1	1	1	0	1	0	0	1	0	1	1	1	0	1	0	0	1	0	10.7	10.7	10.7	19.32	168	168	0	32.827	10.7	10.7	10.7
Q9H8S9;Q7L9L4	Q9H8S9;Q7L9L4	3;2	3;2	3;2	MOB kinase activator 1A;MOB kinase activator 1B	MOB1A;MOB1B	;	2	3	3	3	0	0	0	0	0	0	1	2	0	0	0	0	0	0	0	1	2	0	0	0	0	0	0	0	1	2	0	13.9	13.9	13.9	25.079	216	216;216	0	4.6884	0	0	0
Q9H910	Q9H910	1	1	1	Hematological and neurological expressed 1-like protein	HN1L		1	1	1	1	0	0	0	0	0	0	1	1	0	0	0	0	0	0	0	1	1	0	0	0	0	0	0	0	1	1	0	7.4	7.4	7.4	20.063	190	190	0.0034746	2.5669	0	0	0
Q9HAT2	Q9HAT2	4	4	4	Sialate O-acetylesterase	SIAE		1	4	4	4	0	0	0	1	0	0	1	0	2	0	0	0	1	0	0	1	0	2	0	0	0	1	0	0	1	0	2	9.6	9.6	9.6	58.314	523	523	0	4.6672	0	0	0
Q9HB21	Q9HB21	1	1	1	Pleckstrin homology domain-containing family A member 1	PLEKHA1		1	1	1	1	0	0	0	0	0	0	0	0	1	0	0	0	0	0	0	0	0	1	0	0	0	0	0	0	0	0	1	3.7	3.7	3.7	45.553	404	404	1	-2	0	0	0
Q9HB71	Q9HB71	3	3	3	Calcyclin-binding protein	CACYBP		1	3	3	3	0	2	0	0	2	1	0	3	2	0	2	0	0	2	1	0	3	2	0	2	0	0	2	1	0	3	2	11.4	11.4	11.4	26.21	228	228	0	5.0543	0	8.3	0
Q9HBJ7	Q9HBJ7	1	1	1	Ubiquitin carboxyl-terminal hydrolase 29	USP29		1	1	1	1	1	0	0	0	0	0	0	0	0	1	0	0	0	0	0	0	0	0	1	0	0	0	0	0	0	0	0	1.1	1.1	1.1	104.15	922	922	1	-2	1.1	0	0
Q9HBR0	Q9HBR0	1	1	1	Putative sodium-coupled neutral amino acid transporter 10	SLC38A10		1	1	1	1	0	0	0	1	0	0	0	0	0	0	0	0	1	0	0	0	0	0	0	0	0	1	0	0	0	0	0	2.6	2.6	2.6	119.76	1119	1119	0.0034892	2.6135	0	0	0
Q9HC38	Q9HC38	5	5	5	Glyoxalase domain-containing protein 4	GLOD4		1	5	5	5	4	2	1	1	2	1	3	2	2	4	2	1	1	2	1	3	2	2	4	2	1	1	2	1	3	2	2	16.3	16.3	16.3	34.793	313	313	0	12.044	13.1	6.7	4.2
Q9HC56	Q9HC56	7	7	7	Protocadherin-9	PCDH9		1	7	7	7	0	2	2	0	3	3	0	3	6	0	2	2	0	3	3	0	3	6	0	2	2	0	3	3	0	3	6	6.4	6.4	6.4	136.06	1237	1237	0	17.6	0	1.9	1.7
Q9HC77	Q9HC77	1	1	1	Centromere protein J	CENPJ		1	1	1	1	0	0	0	0	0	1	0	0	0	0	0	0	0	0	1	0	0	0	0	0	0	0	0	1	0	0	0	1.3	1.3	1.3	153	1338	1338	0.0047393	2.3395	0	0	0
Q9HCL0	Q9HCL0	3	3	3	Protocadherin-18	PCDH18		1	3	3	3	3	2	2	2	2	2	3	1	2	3	2	2	2	2	2	3	1	2	3	2	2	2	2	2	3	1	2	2.6	2.6	2.6	126.15	1135	1135	0	6.2936	2.6	1.7	1.7
Q9HCU0	Q9HCU0	17	17	17	Endosialin	CD248		1	17	17	17	11	8	7	13	10	11	14	10	12	11	8	7	13	10	11	14	10	12	11	8	7	13	10	11	14	10	12	23	23	23	80.858	757	757	0	192.64	14.5	8.5	12.2
Q9NP84	Q9NP84	3	3	3	Tumor necrosis factor receptor superfamily member 12A	TNFRSF12A		1	3	3	3	2	2	2	2	3	2	1	2	2	2	2	2	2	3	2	1	2	2	2	2	2	2	3	2	1	2	2	23.3	23.3	23.3	13.911	129	129	0	32.447	23.3	23.3	23.3
Q9NP97;Q8TF09	Q9NP97;Q8TF09	2;2	2;2	2;2	Dynein light chain roadblock-type 1;Dynein light chain roadblock-type 2	DYNLRB1;DYNLRB2	;	2	2	2	2	0	1	1	0	0	0	1	2	0	0	1	1	0	0	0	1	2	0	0	1	1	0	0	0	1	2	0	16.7	16.7	16.7	10.921	96	96;96	0	6.1222	0	12.5	12.5
Q9NPF2	Q9NPF2	4	4	4	Carbohydrate sulfotransferase 11	CHST11		1	4	4	4	0	1	2	0	1	2	0	3	1	0	1	2	0	1	2	0	3	1	0	1	2	0	1	2	0	3	1	11.1	11.1	11.1	41.554	352	352	0	7.1542	0	2.8	5.1
Q9NPR2	Q9NPR2	3	3	3	Semaphorin-4B	SEMA4B		1	3	3	3	0	1	0	1	1	1	0	1	1	0	1	0	1	1	1	0	1	1	0	1	0	1	1	1	0	1	1	6.6	6.6	6.6	92.192	832	832	0	22.684	0	0.8	0
Q9NQ30	Q9NQ30	3	3	3	Endothelial cell-specific molecule 1	ESM1		1	3	3	3	2	1	1	0	1	2	1	1	0	2	1	1	0	1	2	1	1	0	2	1	1	0	1	2	1	1	0	18.5	18.5	18.5	20.095	184	184	0	7.7428	13	6.5	6.5
Q9NQC3	Q9NQC3	1	1	1	Reticulon-4	RTN4		1	1	1	1	0	1	1	0	1	0	0	0	1	0	1	1	0	1	0	0	0	1	0	1	1	0	1	0	0	0	1	1.1	1.1	1.1	129.93	1192	1192	0.0035186	2.7131	0	1.1	1.1
Q9NQP4	Q9NQP4	1	1	1	Prefoldin subunit 4	PFDN4		1	1	1	1	0	0	0	0	1	1	1	0	0	0	0	0	0	1	1	1	0	0	0	0	0	0	1	1	1	0	0	9	9	9	15.314	134	134	0.00075358	3.5656	0	0	0
Q9NQR4	Q9NQR4	1	1	1	Omega-amidase NIT2	NIT2		1	1	1	1	0	0	0	0	0	0	0	1	0	0	0	0	0	0	0	0	1	0	0	0	0	0	0	0	0	1	0	6.2	6.2	6.2	30.608	276	276	0.0041638	2.5414	0	0	0
Q9NQS3	Q9NQS3	2	2	2	Nectin-3	PVRL3		1	2	2	2	1	1	0	0	0	0	0	0	0	1	1	0	0	0	0	0	0	0	1	1	0	0	0	0	0	0	0	5.6	5.6	5.6	61.002	549	549	0	10.568	4.2	1.5	0
Q9NQW7	Q9NQW7	2	2	2	Xaa-Pro aminopeptidase 1	XPNPEP1		1	2	2	2	0	0	0	0	0	0	0	2	0	0	0	0	0	0	0	0	2	0	0	0	0	0	0	0	0	2	0	2.9	2.9	2.9	69.917	623	623	0.004749	2.3558	0	0	0
Q9NR12	Q9NR12	5	5	5	PDZ and LIM domain protein 7	PDLIM7		1	5	5	5	2	3	1	3	3	2	3	5	2	2	3	1	3	3	2	3	5	2	2	3	1	3	3	2	3	5	2	9.8	9.8	9.8	49.844	457	457	0	22.839	4.2	4.8	1.5
Q9NR45	Q9NR45	2	2	2	Sialic acid synthase	NANS		1	2	2	2	0	1	0	0	0	0	0	1	0	0	1	0	0	0	0	0	1	0	0	1	0	0	0	0	0	1	0	7.8	7.8	7.8	40.307	359	359	0	8.1412	0	2.8	0
Q9NR56	Q9NR56	1	1	1	Muscleblind-like protein 1	MBNL1		1	1	1	1	0	0	0	0	0	0	0	1	0	0	0	0	0	0	0	0	1	0	0	0	0	0	0	0	0	1	0	2.8	2.8	2.8	41.817	388	388	0.00074349	3.4299	0	0	0
Q9NR99	Q9NR99	37	37	37	Matrix-remodeling-associated protein 5	MXRA5		1	37	37	37	28	0	0	16	0	0	23	0	0	28	0	0	16	0	0	23	0	0	28	0	0	16	0	0	23	0	0	14.8	14.8	14.8	312.15	2828	2828	0	190.96	11	0	0
Q9NRA1	Q9NRA1	6	6	6	Platelet-derived growth factor C;Platelet-derived growth factor C, latent form;Platelet-derived growth factor C, receptor-binding form	PDGFC		1	6	6	6	3	0	0	2	3	2	4	2	2	3	0	0	2	3	2	4	2	2	3	0	0	2	3	2	4	2	2	17.4	17.4	17.4	39.029	345	345	0	16.951	9	0	0
Q9NRB3	Q9NRB3	1	1	1	Carbohydrate sulfotransferase 12	CHST12		1	1	1	1	1	0	1	1	1	1	1	0	1	1	0	1	1	1	1	1	0	1	1	0	1	1	1	1	1	0	1	2.4	2.4	2.4	48.414	414	414	0.0047297	2.3231	2.4	0	2.4
Q9NRN5	Q9NRN5	33	33	33	Olfactomedin-like protein 3	OLFML3		1	33	33	33	28	15	11	24	15	13	23	8	11	28	15	11	24	15	13	23	8	11	28	15	11	24	15	13	23	8	11	56.9	56.9	56.9	46.01	406	406	0	284.09	51.5	38.2	22.9
Q9NRN7	Q9NRN7	3	3	3	L-aminoadipate-semialdehyde dehydrogenase-phosphopantetheinyl transferase	AASDHPPT		1	3	3	3	0	0	0	0	0	1	1	3	1	0	0	0	0	0	1	1	3	1	0	0	0	0	0	1	1	3	1	8.1	8.1	8.1	35.776	309	309	0	6.1008	0	0	0
Q9NRR4	Q9NRR4	1	1	1	Ribonuclease 3	DROSHA		1	1	1	1	0	0	0	0	0	0	0	1	1	0	0	0	0	0	0	0	1	1	0	0	0	0	0	0	0	1	1	0.8	0.8	0.8	159.31	1374	1374	1	-2	0	0	0
Q9NRX4	Q9NRX4	2	2	2	14 kDa phosphohistidine phosphatase	PHPT1		1	2	2	2	1	0	0	1	1	0	0	2	0	1	0	0	1	1	0	0	2	0	1	0	0	1	1	0	0	2	0	20.8	20.8	20.8	13.832	125	125	0	7.5196	8.8	0	0
Q9NS15	Q9NS15	21	20	20	Latent-transforming growth factor beta-binding protein 3	LTBP3		1	21	20	20	8	5	8	15	11	9	10	10	12	8	5	8	15	11	9	9	10	12	8	5	8	15	11	9	9	10	12	21.3	20.6	20.6	139.36	1303	1303	0	123.93	8.1	5.8	7.1
Q9NSD9	Q9NSD9	1	1	1	Phenylalanine--tRNA ligase beta subunit	FARSB		1	1	1	1	0	0	0	0	1	0	0	1	0	0	0	0	0	1	0	0	1	0	0	0	0	0	1	0	0	1	0	1.5	1.5	1.5	66.115	589	589	0.0029112	3.0512	0	0	0
Q9NTK5	Q9NTK5	2	2	2	Obg-like ATPase 1	OLA1		1	2	2	2	2	1	1	0	1	1	1	2	1	2	1	1	0	1	1	1	2	1	2	1	1	0	1	1	1	2	1	6.1	6.1	6.1	44.743	396	396	0	4.8566	6.1	2.8	2.8
Q9NU22	Q9NU22	1	1	1	Midasin	MDN1		1	1	1	1	0	0	0	1	0	0	0	0	0	0	0	0	1	0	0	0	0	0	0	0	0	1	0	0	0	0	0	0.1	0.1	0.1	632.81	5596	5596	1	-2	0	0	0
Q9NUP9	Q9NUP9	1	1	1	Protein lin-7 homolog C	LIN7C		1	1	1	1	0	0	0	0	1	0	0	1	0	0	0	0	0	1	0	0	1	0	0	0	0	0	1	0	0	1	0	5.6	5.6	5.6	21.834	197	197	0.0041522	2.532	0	0	0
Q9NVA2;Q92599;Q14141	Q9NVA2	13;3;2	13;3;2	12;2;2	Septin-11	2011-09-01		3	13	13	12	4	2	1	3	4	1	3	3	2	4	2	1	3	4	1	3	3	2	4	2	1	2	3	1	3	3	1	35.7	35.7	30.8	49.398	429	429;483;434	0	36.463	11.2	5.1	3
Q9NVD7	Q9NVD7	2	2	2	Alpha-parvin	PARVA		1	2	2	2	0	0	0	0	0	0	2	0	0	0	0	0	0	0	0	2	0	0	0	0	0	0	0	0	2	0	0	8.6	8.6	8.6	42.243	372	372	0	5.0627	0	0	0
Q9NVM1	Q9NVM1	2	2	2	Protein eva-1 homolog B	EVA1B		1	2	2	2	2	1	0	1	2	1	2	1	1	2	1	0	1	2	1	2	1	1	2	1	0	1	2	1	2	1	1	18.8	18.8	18.8	18.373	165	165	0	10.934	18.8	4.2	0
Q9NWM8	Q9NWM8	3	3	3	Peptidyl-prolyl cis-trans isomerase FKBP14	FKBP14		1	3	3	3	3	0	0	0	0	0	2	0	0	3	0	0	0	0	0	2	0	0	3	0	0	0	0	0	2	0	0	15.2	15.2	15.2	24.171	211	211	0	18.125	15.2	0	0
Q9NWV4	Q9NWV4	1	1	1	UPF0587 protein C1orf123	C1orf123		1	1	1	1	1	0	0	0	0	0	1	1	0	1	0	0	0	0	0	1	1	0	1	0	0	0	0	0	1	1	0	10.6	10.6	10.6	18.048	160	160	0	4.3139	10.6	0	0
Q9NWV8	Q9NWV8	1	1	1	BRISC and BRCA1-A complex member 1	BABAM1		1	1	1	1	0	0	0	0	0	0	0	1	0	0	0	0	0	0	0	0	1	0	0	0	0	0	0	0	0	1	0	3.3	3.3	3.3	36.56	329	329	0.0066138	2.1524	0	0	0
Q9NX62	Q9NX62	3	3	3	Inositol monophosphatase 3	IMPAD1		1	3	3	3	1	1	1	1	2	2	1	1	1	1	1	1	1	2	2	1	1	1	1	1	1	1	2	2	1	1	1	6.1	6.1	6.1	38.681	359	359	0	4.8383	2.8	2.8	2.8
Q9NY33	Q9NY33	7	7	7	Dipeptidyl peptidase 3	DPP3		1	7	7	7	1	2	0	0	3	0	3	5	1	1	2	0	0	3	0	3	5	1	1	2	0	0	3	0	3	5	1	12.9	12.9	12.9	82.588	737	737	0	70.832	2.2	3.4	0
Q9NY97	Q9NY97	2	2	2	N-acetyllactosaminide beta-1,3-N-acetylglucosaminyltransferase 2	B3GNT2		1	2	2	2	1	1	1	1	2	1	1	1	1	1	1	1	1	2	1	1	1	1	1	1	1	1	2	1	1	1	1	4.5	4.5	4.5	46.021	397	397	0	4.2665	2.3	2.3	2.3
Q9NYL2	Q9NYL2	1	1	1	Mitogen-activated protein kinase kinase kinase MLT	ZAK		1	1	1	1	0	0	0	0	0	0	0	1	0	0	0	0	0	0	0	0	1	0	0	0	0	0	0	0	0	1	0	1.2	1.2	1.2	91.154	800	800	1	-2	0	0	0
Q9NYL9;P28289	Q9NYL9	4;1	4;1	4;1	Tropomodulin-3	TMOD3		2	4	4	4	1	1	0	0	2	1	1	4	1	1	1	0	0	2	1	1	4	1	1	1	0	0	2	1	1	4	1	14.5	14.5	14.5	39.594	352	352;359	0	18.831	3.1	3.1	0
Q9NYQ8	Q9NYQ8	1	1	1	Protocadherin Fat 2	FAT2		1	1	1	1	0	0	0	0	0	0	0	0	1	0	0	0	0	0	0	0	0	1	0	0	0	0	0	0	0	0	1	0.3	0.3	0.3	479.31	4349	4349	1	-2	0	0	0
Q9NYU2	Q9NYU2	9	9	9	UDP-glucose:glycoprotein glucosyltransferase 1	UGGT1		1	9	9	9	5	0	0	1	5	6	3	4	3	5	0	0	1	5	6	3	4	3	5	0	0	1	5	6	3	4	3	6.4	6.4	6.4	177.19	1555	1555	0	21.742	3.5	0	0
Q9NZ08	Q9NZ08	7	7	7	Endoplasmic reticulum aminopeptidase 1	ERAP1		1	7	7	7	2	3	2	1	3	3	2	4	3	2	3	2	1	3	3	2	4	3	2	3	2	1	3	3	2	4	3	7.5	7.5	7.5	107.23	941	941	0	16.829	1.9	3.2	2.4
Q9NZD2	Q9NZD2	1	1	1	Glycolipid transfer protein	GLTP		1	1	1	1	0	1	0	0	0	0	0	1	0	0	1	0	0	0	0	0	1	0	0	1	0	0	0	0	0	1	0	7.2	7.2	7.2	23.85	209	209	0	4.2581	0	7.2	0
Q9NZL9	Q9NZL9	2	2	2	Methionine adenosyltransferase 2 subunit beta	MAT2B		1	2	2	2	1	1	0	0	1	1	2	1	1	1	1	0	0	1	1	2	1	1	1	1	0	0	1	1	2	1	1	7.2	7.2	7.2	37.551	334	334	0	5.4607	3.6	3.6	0
Q9NZM1	Q9NZM1	2	2	2	Myoferlin	MYOF		1	2	2	2	0	0	0	1	1	0	2	0	0	0	0	0	1	1	0	2	0	0	0	0	0	1	1	0	2	0	0	1	1	1	234.71	2061	2061	0	3.9751	0	0	0
Q9NZN4	Q9NZN4	4	4	3	EH domain-containing protein 2	EHD2		1	4	4	3	0	1	2	3	2	2	2	1	2	0	1	2	3	2	2	2	1	2	0	0	1	3	2	2	1	1	1	9.2	9.2	7.6	61.161	543	543	0	11.775	0	1.7	3.9
Q9NZP8	Q9NZP8	5	4	4	Complement C1r subcomponent-like protein	C1RL		1	5	4	4	3	1	1	4	0	2	4	1	2	2	1	1	3	0	2	3	1	2	2	1	1	3	0	2	3	1	2	9	7.2	7.2	53.498	487	487	0	27.126	6.8	3.1	3.1
Q9NZU0	Q9NZU0	16	16	16	Leucine-rich repeat transmembrane protein FLRT3	FLRT3		1	16	16	16	0	5	5	0	6	8	0	9	7	0	5	5	0	6	8	0	9	7	0	5	5	0	6	8	0	9	7	28.5	28.5	28.5	73.003	649	649	0	82.597	0	10.3	10.2
Q9NZV1	Q9NZV1	13	13	13	Cysteine-rich motor neuron 1 protein;Processed cysteine-rich motor neuron 1 protein	CRIM1		1	13	13	13	10	1	1	7	3	4	7	2	3	10	1	1	7	3	4	7	2	3	10	1	1	7	3	4	7	2	3	15.8	15.8	15.8	113.74	1036	1036	0	52.828	14	1.3	1.3
Q9P0L0	Q9P0L0	2	2	2	Vesicle-associated membrane protein-associated protein A	VAPA		1	2	2	2	1	1	1	0	0	1	1	1	1	1	1	1	0	0	1	1	1	1	1	1	1	0	0	1	1	1	1	11.2	11.2	11.2	27.893	249	249	0	5.9404	5.6	5.6	5.6
Q9P121;Q14982	Q9P121	13;1	13;1	13;1	Neurotrimin	NTM		2	13	13	13	5	7	7	5	10	9	4	7	8	5	7	7	5	10	9	4	7	8	5	7	7	5	10	9	4	7	8	35.5	35.5	35.5	37.971	344	344;345	0	96.745	15.4	24.4	18.9
Q9P1F3	Q9P1F3	1	1	1	Costars family protein ABRACL	ABRACL		1	1	1	1	1	1	1	0	1	1	1	1	1	1	1	1	0	1	1	1	1	1	1	1	1	0	1	1	1	1	1	11.1	11.1	11.1	9.0564	81	81	0.00075019	3.5015	11.1	11.1	11.1
Q9P232	Q9P232	8	8	8	Contactin-3	CNTN3		1	8	8	8	3	0	0	2	0	0	5	0	0	3	0	0	2	0	0	5	0	0	3	0	0	2	0	0	5	0	0	9.2	9.2	9.2	112.88	1028	1028	0	22.048	3.2	0	0
Q9P283	Q9P283	2	2	2	Semaphorin-5B	SEMA5B		1	2	2	2	0	0	0	0	1	1	0	1	1	0	0	0	0	1	1	0	1	1	0	0	0	0	1	1	0	1	1	2.3	2.3	2.3	125.91	1151	1151	0.0053727	2.2767	0	0	0
Q9P287	Q9P287	1	1	1	BRCA2 and CDKN1A-interacting protein	BCCIP		1	1	1	1	0	0	0	0	0	0	0	1	0	0	0	0	0	0	0	0	1	0	0	0	0	0	0	0	0	1	0	5.1	5.1	5.1	35.979	314	314	0.0022075	3.2539	0	0	0
Q9P2E5	Q9P2E5	2	2	2	Chondroitin sulfate glucuronyltransferase	CHPF2		1	2	2	2	0	0	0	0	2	2	0	2	2	0	0	0	0	2	2	0	2	2	0	0	0	0	2	2	0	2	2	1.9	1.9	1.9	85.947	772	772	0	3.9198	0	0	0
Q9P2E7	Q9P2E7	3	3	3	Protocadherin-10	PCDH10		1	3	3	3	2	0	0	0	0	0	2	0	0	2	0	0	0	0	0	2	0	0	2	0	0	0	0	0	2	0	0	3.8	3.8	3.8	112.93	1040	1040	0	5.5911	2.1	0	0
Q9P2E9;Q8N4C6	Q9P2E9	13;1	13;1	13;1	Ribosome-binding protein 1	RRBP1		2	13	13	13	1	4	2	1	9	3	3	4	6	1	4	2	1	9	3	3	4	6	1	4	2	1	9	3	3	4	6	10.4	10.4	10.4	152.47	1410	1410;2090	0	82.026	0.7	3.5	1.8
Q9P2H0	Q9P2H0	1	1	1	Centrosomal protein of 126 kDa	CEP126		1	1	1	1	0	0	0	0	0	0	1	0	0	0	0	0	0	0	0	1	0	0	0	0	0	0	0	0	1	0	0	0.9	0.9	0.9	125.87	1117	1117	1	-2	0	0	0
Q9P2J5	Q9P2J5	4	4	4	Leucine--tRNA ligase, cytoplasmic	LARS		1	4	4	4	0	0	0	0	1	0	0	2	1	0	0	0	0	1	0	0	2	1	0	0	0	0	1	0	0	2	1	3.5	3.5	3.5	134.46	1176	1176	0	9.4434	0	0	0
Q9UBE0	Q9UBE0	4	4	4	SUMO-activating enzyme subunit 1;SUMO-activating enzyme subunit 1, N-terminally processed	SAE1		1	4	4	4	1	3	1	0	1	0	0	1	2	1	3	1	0	1	0	0	1	2	1	3	1	0	1	0	0	1	2	9.2	9.2	9.2	38.449	346	346	0	5.0417	2	6.9	2.6
Q9UBG0	Q9UBG0	20	20	20	C-type mannose receptor 2	MRC2		1	20	20	20	8	5	6	8	4	11	10	9	11	8	5	6	8	4	11	10	9	11	8	5	6	8	4	11	10	9	11	14.1	14.1	14.1	166.67	1479	1479	0	114.1	8.2	3.6	4.9
Q9UBI6	Q9UBI6	4	4	4	Guanine nucleotide-binding protein G(I)/G(S)/G(O) subunit gamma-12	GNG12		1	4	4	4	4	1	2	1	1	1	1	1	1	4	1	2	1	1	1	1	1	1	4	1	2	1	1	1	1	1	1	59.7	59.7	59.7	8.0061	72	72	0	9.1862	59.7	9.7	34.7
Q9UBN6	Q9UBN6	1	1	1	Tumor necrosis factor receptor superfamily member 10D	TNFRSF10D		1	1	1	1	0	1	1	0	1	1	0	1	1	0	1	1	0	1	1	0	1	1	0	1	1	0	1	1	0	1	1	3.4	3.4	3.4	41.823	386	386	0	4.1166	0	3.4	3.4
Q9UBP4	Q9UBP4	12	12	12	Dickkopf-related protein 3	DKK3		1	12	12	12	10	4	4	10	3	3	8	2	4	10	4	4	10	3	3	8	2	4	10	4	4	10	3	3	8	2	4	48.9	48.9	48.9	38.39	350	350	0	170.42	42	10.9	15.1
Q9UBQ0	Q9UBQ0	3	3	3	Vacuolar protein sorting-associated protein 29	VPS29		1	3	3	3	0	1	1	0	1	0	1	2	1	0	1	1	0	1	0	1	2	1	0	1	1	0	1	0	1	2	1	19.8	19.8	19.8	20.505	182	182	0	5.3325	0	5.5	5.5
Q9UBQ6	Q9UBQ6	4	4	4	Exostosin-like 2;Processed exostosin-like 2	EXTL2		1	4	4	4	3	1	1	3	1	1	1	2	3	3	1	1	3	1	1	1	2	3	3	1	1	3	1	1	1	2	3	12.7	12.7	12.7	37.465	330	330	0	8.0219	10.6	3.3	3.3
Q9UBR2	Q9UBR2	10	10	10	Cathepsin Z	CTSZ		1	10	10	10	9	4	4	6	8	4	7	7	6	9	4	4	6	8	4	7	7	6	9	4	4	6	8	4	7	7	6	33	33	33	33.868	303	303	0	66.04	32.3	12.9	12.9
Q9UBS3	Q9UBS3	3	3	3	DnaJ homolog subfamily B member 9	DNAJB9		1	3	3	3	0	2	2	0	2	3	0	2	2	0	2	2	0	2	3	0	2	2	0	2	2	0	2	3	0	2	2	17.9	17.9	17.9	25.518	223	223	0	10.993	0	10.8	11.7
Q9UBS4	Q9UBS4	1	1	1	DnaJ homolog subfamily B member 11	DNAJB11		1	1	1	1	0	0	0	0	1	0	0	0	0	0	0	0	0	1	0	0	0	0	0	0	0	0	1	0	0	0	0	4.5	4.5	4.5	40.513	358	358	0.0041494	2.518	0	0	0
Q9UBT2	Q9UBT2	3	3	3	SUMO-activating enzyme subunit 2	UBA2		1	3	3	3	0	1	1	0	1	0	2	3	1	0	1	1	0	1	0	2	3	1	0	1	1	0	1	0	2	3	1	4.7	4.7	4.7	71.223	640	640	0	5.5702	0	1.1	1.1
Q9UBX1	Q9UBX1	6	6	6	Cathepsin F	CTSF		1	6	6	6	3	0	0	2	1	0	5	0	1	3	0	0	2	1	0	5	0	1	3	0	0	2	1	0	5	0	1	13.4	13.4	13.4	53.365	484	484	0	12.799	6.2	0	0
Q9UBX5	Q9UBX5	15	15	15	Fibulin-5	FBLN5		1	15	15	15	12	5	3	8	6	5	7	6	5	12	5	3	8	6	5	7	6	5	12	5	3	8	6	5	7	6	5	37.5	37.5	37.5	50.18	448	448	0	88.037	34.6	10.3	6.9
Q9UBZ9	Q9UBZ9	1	1	1	DNA repair protein REV1	REV1		1	1	1	1	0	0	0	0	0	1	0	0	0	0	0	0	0	0	1	0	0	0	0	0	0	0	0	1	0	0	0	0.9	0.9	0.9	138.25	1251	1251	1	-2	0	0	0
Q9UHB6	Q9UHB6	5	5	5	LIM domain and actin-binding protein 1	LIMA1		1	5	5	5	1	1	1	1	0	2	2	4	1	1	1	1	1	0	2	2	4	1	1	1	1	1	0	2	2	4	1	7	7	7	85.225	759	759	0	17.756	1.8	1.2	1.8
Q9UHD8	Q9UHD8	9	9	9	Septin-9	2009-09-01		1	9	9	9	4	3	3	2	5	2	0	5	2	4	3	3	2	5	2	0	5	2	4	3	3	2	5	2	0	5	2	15.7	15.7	15.7	65.401	586	586	0	23.718	6.1	5.6	5.6
Q9UHI8	Q9UHI8	3	3	3	A disintegrin and metalloproteinase with thrombospondin motifs 1	ADAMTS1		1	3	3	3	0	0	0	1	1	0	1	1	1	0	0	0	1	1	0	1	1	1	0	0	0	1	1	0	1	1	1	4.8	4.8	4.8	105.36	967	967	0	6.5132	0	0	0
Q9UHL4	Q9UHL4	5	5	5	Dipeptidyl peptidase 2	DPP7		1	5	5	5	3	1	0	2	2	1	1	1	4	3	1	0	2	2	1	1	1	4	3	1	0	2	2	1	1	1	4	10.4	10.4	10.4	54.341	492	492	0	10.168	5.7	2	0
Q9UHN6	Q9UHN6	7	7	7	Transmembrane protein 2	TMEM2		1	7	7	7	0	3	3	0	4	3	1	2	1	0	3	3	0	4	3	1	2	1	0	3	3	0	4	3	1	2	1	5.9	5.9	5.9	154.37	1383	1383	0	16.039	0	2.2	2.4
Q9UHV9	Q9UHV9	2	2	2	Prefoldin subunit 2	PFDN2		1	2	2	2	1	1	1	0	2	1	1	1	1	1	1	1	0	2	1	1	1	1	1	1	1	0	2	1	1	1	1	16.9	16.9	16.9	16.648	154	154	0	29.719	9.1	7.8	7.8
Q9UHY1	Q9UHY1	1	1	1	Nuclear receptor-binding protein	NRBP1		1	1	1	1	0	0	0	0	1	0	0	0	0	0	0	0	0	1	0	0	0	0	0	0	0	0	1	0	0	0	0	1.5	1.5	1.5	59.844	535	535	0.0040928	2.403	0	0	0
Q9UI42	Q9UI42	9	9	9	Carboxypeptidase A4	CPA4		1	9	9	9	4	0	0	5	0	0	7	0	0	4	0	0	5	0	0	7	0	0	4	0	0	5	0	0	7	0	0	21.4	21.4	21.4	47.351	421	421	0	29.649	10	0	0
Q9UIW2	Q9UIW2	3	3	3	Plexin-A1	PLXNA1		1	3	3	3	0	1	0	0	1	1	0	2	1	0	1	0	0	1	1	0	2	1	0	1	0	0	1	1	0	2	1	1.9	1.9	1.9	211.06	1896	1896	0	8.9685	0	0.8	0
Q9UJJ9	Q9UJJ9	6	6	6	N-acetylglucosamine-1-phosphotransferase subunit gamma	GNPTG		1	6	6	6	3	3	2	3	2	4	5	3	4	3	3	2	3	2	4	5	3	4	3	3	2	3	2	4	5	3	4	27.2	27.2	27.2	33.973	305	305	0	26.767	7.9	14.4	7.9
Q9UJU6	Q9UJU6	3	3	3	Drebrin-like protein	DBNL		1	3	3	3	1	3	1	1	2	0	1	1	0	1	3	1	1	2	0	1	1	0	1	3	1	1	2	0	1	1	0	8.8	8.8	8.8	48.207	430	430	0	11.874	3.7	8.8	2.6
Q9UK76	Q9UK76	1	1	1	Hematological and neurological expressed 1 protein;Hematological and neurological expressed 1 protein, N-terminally processed	HN1		1	1	1	1	1	1	0	1	0	0	1	0	1	1	1	0	1	0	0	1	0	1	1	1	0	1	0	0	1	0	1	9.7	9.7	9.7	16.014	154	154	0	8.3813	9.7	9.7	0
Q9UKE5;O95819;Q8N4C8	Q9UKE5;O95819;Q8N4C8	2;1;1	2;1;1	2;1;1	TRAF2 and NCK-interacting protein kinase;Mitogen-activated protein kinase kinase kinase kinase 4;Misshapen-like kinase 1	TNIK;MAP4K4;MINK1	;;	3	2	2	2	0	0	0	0	1	1	0	1	0	0	0	0	0	1	1	0	1	0	0	0	0	0	1	1	0	1	0	1.2	1.2	1.2	154.94	1360	1360;1239;1332	0.0035511	2.7974	0	0	0
Q9UKK9	Q9UKK9	4	4	4	ADP-sugar pyrophosphatase	NUDT5		1	4	4	4	1	3	3	0	2	1	0	3	1	1	3	3	0	2	1	0	3	1	1	3	3	0	2	1	0	3	1	22.8	22.8	22.8	24.327	219	219	0	17.719	6.4	15.5	15.5
Q9UKU6	Q9UKU6	9	9	9	Thyrotropin-releasing hormone-degrading ectoenzyme	TRHDE		1	9	9	9	5	3	0	4	4	5	4	3	4	5	3	0	4	4	5	4	3	4	5	3	0	4	4	5	4	3	4	8.7	8.7	8.7	117	1024	1024	0	28.266	5	3.1	0
Q9UKU9;Q8NI99	Q9UKU9	10;1	10;1	10;1	Angiopoietin-related protein 2	ANGPTL2		2	10	10	10	5	0	0	4	0	0	6	0	0	5	0	0	4	0	0	6	0	0	5	0	0	4	0	0	6	0	0	25.6	25.6	25.6	57.104	493	493;470	0	21.311	15	0	0
Q9UKY7	Q9UKY7	4	4	4	Protein CDV3 homolog	CDV3		1	4	4	4	1	0	0	0	2	0	3	1	1	1	0	0	0	2	0	3	1	1	1	0	0	0	2	0	3	1	1	12.4	12.4	12.4	27.335	258	258	0	8.9984	3.5	0	0
Q9UL46	Q9UL46	3	3	3	Proteasome activator complex subunit 2	PSME2		1	3	3	3	1	1	1	0	1	0	2	1	0	1	1	1	0	1	0	2	1	0	1	1	1	0	1	0	2	1	0	17.2	17.2	17.2	27.401	239	239	0	9.5068	6.3	6.3	6.3
Q9ULL8	Q9ULL8	1	1	1	Protein Shroom4	SHROOM4		1	1	1	1	1	1	1	1	0	0	0	0	0	1	1	1	1	0	0	0	0	0	1	1	1	1	0	0	0	0	0	1.1	1.1	1.1	164.86	1493	1493	0	4.0901	1.1	1.1	1.1
Q9ULV4	Q9ULV4	17	17	17	Coronin-1C	CORO1C		1	17	17	17	10	6	5	7	4	4	12	5	5	10	6	5	7	4	4	12	5	5	10	6	5	7	4	4	12	5	5	34	34	34	53.248	474	474	0	117.92	20.7	13.5	11.2
Q9UMF0	Q9UMF0	14	14	14	Intercellular adhesion molecule 5	ICAM5		1	14	14	14	5	7	4	2	7	10	3	6	10	5	7	4	2	7	10	3	6	10	5	7	4	2	7	10	3	6	10	17.1	17.1	17.1	97.115	924	924	0	120.58	6.4	7.7	5
Q9UMS4	Q9UMS4	2	2	2	Pre-mRNA-processing factor 19	PRPF19		1	2	2	2	0	0	0	0	0	0	0	2	1	0	0	0	0	0	0	0	2	1	0	0	0	0	0	0	0	2	1	4.4	4.4	4.4	55.18	504	504	0	4.082	0	0	0
Q9UMX0;Q9NRR5	Q9UMX0;Q9NRR5	1;1	1;1	1;1	Ubiquilin-1;Ubiquilin-4	UBQLN1;UBQLN4	;	2	1	1	1	0	1	0	0	1	1	0	0	1	0	1	0	0	1	1	0	0	1	0	1	0	0	1	1	0	0	1	2.9	2.9	2.9	62.518	589	589;601	0	4.6255	0	2.9	0
Q9UMX5	Q9UMX5	5	5	5	Neudesin	NENF		1	5	5	5	2	0	1	3	1	0	0	1	1	2	0	1	3	1	0	0	1	1	2	0	1	3	1	0	0	1	1	41.3	41.3	41.3	18.856	172	172	0	12.13	15.7	0	5.2
Q9UMY4	Q9UMY4	5	4	4	Sorting nexin-12	SNX12		1	5	4	4	0	2	0	1	2	2	2	1	3	0	1	0	1	2	2	2	1	3	0	1	0	1	2	2	2	1	3	26.2	22.1	22.1	19.73	172	172	0	7.3941	0	9.9	0
Q9UN70	Q9UN70	3	3	3	Protocadherin gamma-C3	PCDHGC3		1	3	3	3	2	1	2	2	1	1	1	2	2	2	1	2	2	1	1	1	2	2	2	1	2	2	1	1	1	2	2	2.7	2.7	2.7	101.08	934	934	0	5.4245	1.8	0.9	1.6
Q9UNA0	Q9UNA0	4	4	4	A disintegrin and metalloproteinase with thrombospondin motifs 5	ADAMTS5		1	4	4	4	0	1	0	0	2	1	0	2	0	0	1	0	0	2	1	0	2	0	0	1	0	0	2	1	0	2	0	4.6	4.6	4.6	101.72	930	930	0	5.2084	0	0.8	0
Q9UNF1	Q9UNF1	2	2	2	Melanoma-associated antigen D2	MAGED2		1	2	2	2	1	0	0	0	0	1	2	1	1	1	0	0	0	0	1	2	1	1	1	0	0	0	0	1	2	1	1	2.8	2.8	2.8	64.953	606	606	0.004104	2.4155	1.3	0	0
Q9UNH7	Q9UNH7	1	1	1	Sorting nexin-6;Sorting nexin-6, N-terminally processed	SNX6		1	1	1	1	0	0	1	0	1	0	0	0	0	0	0	1	0	1	0	0	0	0	0	0	1	0	1	0	0	0	0	2.2	2.2	2.2	46.648	406	406	0.0085809	2.1435	0	0	2.2
Q9UNM6	Q9UNM6	3	3	3	26S proteasome non-ATPase regulatory subunit 13	PSMD13		1	3	3	3	0	0	0	0	2	0	0	1	0	0	0	0	0	2	0	0	1	0	0	0	0	0	2	0	0	1	0	10.4	10.4	10.4	42.945	376	376	0	6.4213	0	0	0
Q9UNN8	Q9UNN8	4	4	4	Endothelial protein C receptor	PROCR		1	4	4	4	1	3	3	1	2	2	2	2	1	1	3	3	1	2	2	2	2	1	1	3	3	1	2	2	2	2	1	20.6	20.6	20.6	26.671	238	238	0	22.771	4.2	13.4	13.4
Q9UNW1	Q9UNW1	10	10	10	Multiple inositol polyphosphate phosphatase 1	MINPP1		1	10	10	10	4	5	1	2	5	4	3	3	6	4	5	1	2	5	4	3	3	6	4	5	1	2	5	4	3	3	6	19.5	19.5	19.5	55.051	487	487	0	42.948	9.2	11.9	2.7
Q9UNZ2	Q9UNZ2	4	4	4	NSFL1 cofactor p47	NSFL1C		1	4	4	4	0	1	0	1	2	1	3	1	1	0	1	0	1	2	1	3	1	1	0	1	0	1	2	1	3	1	1	13.8	13.8	13.8	40.572	370	370	0	15.333	0	3	0
Q9UPR0	Q9UPR0	1	1	1	Inactive phospholipase C-like protein 2	PLCL2		1	1	1	1	0	1	0	0	0	0	0	0	0	0	1	0	0	0	0	0	0	0	0	1	0	0	0	0	0	0	0	1.2	1.2	1.2	125.86	1127	1127	1	-2	0	1.2	0
Q9UQ53	Q9UQ53	4	4	4	Alpha-1,3-mannosyl-glycoprotein 4-beta-N-acetylglucosaminyltransferase B	MGAT4B		1	4	4	4	1	0	0	0	2	2	1	2	1	1	0	0	0	2	2	1	2	1	1	0	0	0	2	2	1	2	1	7.3	7.3	7.3	63.198	548	548	0	7.1939	1.5	0	0
Q9UQ80	Q9UQ80	11	11	11	Proliferation-associated protein 2G4	PA2G4		1	11	11	11	5	5	2	1	3	2	3	7	1	5	5	2	1	3	2	3	7	1	5	5	2	1	3	2	3	7	1	25.1	25.1	25.1	43.786	394	394	0	31.814	13.2	11.4	6.3
Q9Y224	Q9Y224	2	2	2	UPF0568 protein C14orf166	C14orf166		1	2	2	2	0	0	1	0	1	0	0	2	0	0	0	1	0	1	0	0	2	0	0	0	1	0	1	0	0	2	0	9.8	9.8	9.8	28.068	244	244	0	7.4132	0	0	3.3
Q9Y230	Q9Y230	7	7	7	RuvB-like 2	RUVBL2		1	7	7	7	2	3	1	0	1	2	3	2	3	2	3	1	0	1	2	3	2	3	2	3	1	0	1	2	3	2	3	16.6	16.6	16.6	51.156	463	463	0	12.6	5.2	6.7	1.7
Q9Y240	Q9Y240	19	19	19	C-type lectin domain family 11 member A	CLEC11A		1	19	19	19	18	13	10	17	12	12	16	13	13	18	13	10	17	12	12	16	13	13	18	13	10	17	12	12	16	13	13	53.6	53.6	53.6	35.694	323	323	0	323.31	48.3	37.8	32.8
Q9Y247	Q9Y247	1	1	1	Protein FAM50B	FAM50B		1	1	1	1	0	0	0	1	0	0	0	0	1	0	0	0	1	0	0	0	0	1	0	0	0	1	0	0	0	0	1	3.4	3.4	3.4	38.708	325	325	1	-2	0	0	0
Q9Y262	Q9Y262	5	5	5	Eukaryotic translation initiation factor 3 subunit L	EIF3L		1	5	5	5	0	3	0	0	1	0	2	1	1	0	3	0	0	1	0	2	1	1	0	3	0	0	1	0	2	1	1	5.5	5.5	5.5	66.726	564	564	0	5.2308	0	2.8	0
Q9Y265	Q9Y265	3	3	3	RuvB-like 1	RUVBL1		1	3	3	3	0	0	0	0	1	1	0	3	1	0	0	0	0	1	1	0	3	1	0	0	0	0	1	1	0	3	1	7.2	7.2	7.2	50.227	456	456	0	6.2501	0	0	0
Q9Y266	Q9Y266	4	4	4	Nuclear migration protein nudC	NUDC		1	4	4	4	2	2	1	1	1	2	2	2	0	2	2	1	1	1	2	2	2	0	2	2	1	1	1	2	2	2	0	14.2	14.2	14.2	38.242	331	331	0	8.8062	7.3	7.3	2.7
Q9Y281	Q9Y281	10	7	7	Cofilin-2	CFL2		1	10	7	7	5	5	4	2	4	4	6	5	3	2	4	3	1	3	3	5	3	2	2	4	3	1	3	3	5	3	2	45.8	31.9	31.9	18.736	166	166	0	17.189	25.3	25.3	26.5
Q9Y287	Q9Y287	5	5	5	Integral membrane protein 2B;BRI2, membrane form;BRI2 intracellular domain;BRI2C, soluble form;Bri23 peptide	ITM2B		1	5	5	5	5	3	3	4	4	3	4	3	4	5	3	3	4	4	3	4	3	4	5	3	3	4	4	3	4	3	4	19.5	19.5	19.5	30.338	266	266	0	30.68	19.5	11.7	11.7
Q9Y2B0	Q9Y2B0	3	3	3	Protein canopy homolog 2	CNPY2		1	3	3	3	3	1	1	1	1	1	2	1	1	3	1	1	1	1	1	2	1	1	3	1	1	1	1	1	2	1	1	22.5	22.5	22.5	20.652	182	182	0	20.578	22.5	8.8	8.8
Q9Y2D5	Q9Y2D5	5	5	5	A-kinase anchor protein 2	AKAP2		1	5	5	5	1	2	1	1	1	0	2	2	0	1	2	1	1	1	0	2	2	0	1	2	1	1	1	0	2	2	0	7.8	7.8	7.8	94.659	859	859	0	11.861	2.2	4.1	0.9
Q9Y2E5	Q9Y2E5	6	6	6	Epididymis-specific alpha-mannosidase	MAN2B2		1	6	6	6	2	0	0	4	1	0	4	1	0	2	0	0	4	1	0	4	1	0	2	0	0	4	1	0	4	1	0	6	6	6	113.98	1009	1009	0	10.953	1.7	0	0
Q9Y2G5	Q9Y2G5	2	2	2	GDP-fucose protein O-fucosyltransferase 2	POFUT2		1	2	2	2	0	0	0	0	2	0	0	1	0	0	0	0	0	2	0	0	1	0	0	0	0	0	2	0	0	1	0	4.4	4.4	4.4	49.975	429	429	0.0092287	2.1365	0	0	0
Q9Y2I2	Q9Y2I2	5	5	5	Netrin-G1	NTNG1		1	5	5	5	1	1	0	2	0	2	1	1	1	1	1	0	2	0	2	1	1	1	1	1	0	2	0	2	1	1	1	9.6	9.6	9.6	60.54	539	539	0	8.0527	1.7	1.5	0
Q9Y2Z0	Q9Y2Z0	2	2	2	Suppressor of G2 allele of SKP1 homolog	SUGT1		1	2	2	2	0	1	0	0	2	0	0	1	1	0	1	0	0	2	0	0	1	1	0	1	0	0	2	0	0	1	1	6.3	6.3	6.3	41.024	365	365	0.00075245	3.5239	0	3.3	0
Q9Y383	Q9Y383	1	1	1	Putative RNA-binding protein Luc7-like 2	LUC7L2		1	1	1	1	0	0	0	0	1	0	0	1	0	0	0	0	0	1	0	0	1	0	0	0	0	0	1	0	0	1	0	2.3	2.3	2.3	46.513	392	392	0.0035039	2.6721	0	0	0
Q9Y3A5	Q9Y3A5	5	5	5	Ribosome maturation protein SBDS	SBDS		1	5	5	5	0	1	0	0	1	0	2	3	1	0	1	0	0	1	0	2	3	1	0	1	0	0	1	0	2	3	1	24.8	24.8	24.8	28.763	250	250	0	10.322	0	3.2	0
Q9Y3B3	Q9Y3B3	1	1	1	Transmembrane emp24 domain-containing protein 7	TMED7		1	1	1	1	0	0	0	0	0	1	0	0	0	0	0	0	0	0	1	0	0	0	0	0	0	0	0	1	0	0	0	5.8	5.8	5.8	25.171	224	224	0.00074019	3.3862	0	0	0
Q9Y3B8	Q9Y3B8	1	1	1	Oligoribonuclease, mitochondrial	REXO2		1	1	1	1	0	0	0	0	0	0	1	0	0	0	0	0	0	0	0	1	0	0	0	0	0	0	0	0	1	0	0	4.2	4.2	4.2	26.832	237	237	0.0035088	2.6739	0	0	0
Q9Y3C8	Q9Y3C8	2	2	2	Ubiquitin-fold modifier-conjugating enzyme 1	UFC1		1	2	2	2	1	1	0	1	1	2	1	1	1	1	1	0	1	1	2	1	1	1	1	1	0	1	1	2	1	1	1	13.8	13.8	13.8	19.458	167	167	0	6.7274	7.8	7.8	0
Q9Y3F4	Q9Y3F4	8	8	8	Serine-threonine kinase receptor-associated protein	STRAP		1	8	8	8	0	0	1	0	1	2	2	7	2	0	0	1	0	1	2	2	7	2	0	0	1	0	1	2	2	7	2	32.6	32.6	32.6	38.438	350	350	0	21.208	0	0	3.1
Q9Y3I0	Q9Y3I0	2	2	2	tRNA-splicing ligase RtcB homolog	RTCB		1	2	2	2	0	2	0	0	1	0	0	0	0	0	2	0	0	1	0	0	0	0	0	2	0	0	1	0	0	0	0	4	4	4	55.21	505	505	0.0021882	3.1002	0	4	0
Q9Y3U8	Q9Y3U8	4	4	4	60S ribosomal protein L36	RPL36		1	4	4	4	1	1	0	0	1	1	1	0	0	1	1	0	0	1	1	1	0	0	1	1	0	0	1	1	1	0	0	33.3	33.3	33.3	12.254	105	105	0	3.9305	11.4	10.5	0
Q9Y490;Q9Y4G6	Q9Y490	53;8	53;8	53;8	Talin-1	TLN1		2	53	53	53	16	23	21	14	28	20	19	33	21	16	23	21	14	28	20	19	33	21	16	23	21	14	28	20	19	33	21	25.7	25.7	25.7	269.76	2541	2541;2542	0	323.31	7.8	10.5	10.2
Q9Y4K0	Q9Y4K0	28	28	28	Lysyl oxidase homolog 2	LOXL2		1	28	28	28	24	15	16	16	11	14	20	13	15	24	15	16	16	11	14	20	13	15	24	15	16	16	11	14	20	13	15	37.9	37.9	37.9	86.724	774	774	0	323.31	35.4	25.7	25.3
Q9Y4L1	Q9Y4L1	13	13	12	Hypoxia up-regulated protein 1	HYOU1		1	13	13	12	7	5	2	4	7	5	5	4	7	7	5	2	4	7	5	5	4	7	7	5	2	4	7	5	5	4	6	11.1	11.1	11.1	111.33	999	999	0	33.505	6.9	4.5	1.9
Q9Y570	Q9Y570	2	2	2	Protein phosphatase methylesterase 1	PPME1		1	2	2	2	0	0	0	0	1	0	0	1	0	0	0	0	0	1	0	0	1	0	0	0	0	0	1	0	0	1	0	5.2	5.2	5.2	42.315	386	386	0	4.5788	0	0	0
Q9Y5E8;Q9Y5F1;Q9Y5E5;Q9Y5E6;Q9Y5F2;Q9Y5E1;Q9Y5E9;Q9UN67;Q96TA0;Q9NRJ7;Q9Y5E2;Q9Y5E3;Q9Y5E4;Q9Y5F0;Q9Y5E7;Q9UN66	Q9Y5E8;Q9Y5F1;Q9Y5E5;Q9Y5E6;Q9Y5F2;Q9Y5E1;Q9Y5E9;Q9UN67;Q96TA0;Q9NRJ7;Q9Y5E2;Q9Y5E3;Q9Y5E4;Q9Y5F0;Q9Y5E7;Q9UN66	2;2;2;2;2;2;2;2;1;1;1;1;1;1;1;1	2;2;2;2;2;2;2;2;1;1;1;1;1;1;1;1	2;2;2;2;2;2;2;2;1;1;1;1;1;1;1;1	Protocadherin beta-15;Protocadherin beta-12;Protocadherin beta-4;Protocadherin beta-3;Protocadherin beta-11;Protocadherin beta-9;Protocadherin beta-14;Protocadherin beta-10;Putative protocadherin beta-18;Protocadherin beta-16;Protocadherin beta-7;Protocadherin beta-6;Protocadherin beta-5;Protocadherin beta-13;Protocadherin beta-2;Protocadherin beta-8	PCDHB15;PCDHB12;PCDHB4;PCDHB3;PCDHB11;PCDHB9;PCDHB14;PCDHB10;PCDHB18P;PCDHB16;PCDHB7;PCDHB6;PCDHB5;PCDHB13;PCDHB2;PCDHB8	;;;;;;;;;;;;;;;	16	2	2	2	0	0	0	1	1	1	0	1	0	0	0	0	1	1	1	0	1	0	0	0	0	1	1	1	0	1	0	3.2	3.2	3.2	86.328	787	787;795;795;796;797;797;798;800;734;776;793;794;795;798;798;801	0	3.8963	0	0	0
Q9Y5F6	Q9Y5F6	2	2	2	Protocadherin gamma-C5	PCDHGC5		1	2	2	2	0	0	0	0	2	1	0	1	2	0	0	0	0	2	1	0	1	2	0	0	0	0	2	1	0	1	2	2.3	2.3	2.3	101.92	944	944	0	5.2305	0	0	0
Q9Y5F8;Q9Y5G0	Q9Y5F8;Q9Y5G0	4;2	4;2	1;1	Protocadherin gamma-B7;Protocadherin gamma-B5	PCDHGB7;PCDHGB5	;	2	4	4	1	1	0	0	1	1	3	0	1	3	1	0	0	1	1	3	0	1	3	0	0	0	0	1	0	0	0	1	4.5	4.5	1	100.97	929	929;923	0	6.0065	1.3	0	0
Q9Y5G8;Q9Y5G5;Q9Y5H0;Q9Y5G7;Q9Y5G4;Q9Y5H4;Q9Y5H1;Q9Y5G6;Q9Y5G1	Q9Y5G8;Q9Y5G5	8;4;3;3;3;2;2;2;1	8;4;3;3;3;2;2;2;1	3;0;0;0;0;0;0;0;0	Protocadherin gamma-A5;Protocadherin gamma-A8	PCDHGA5;PCDHGA8	;	9	8	8	3	2	2	2	4	3	3	5	6	4	2	2	2	4	3	3	5	6	4	0	1	0	1	2	1	2	3	2	7.3	7.3	2.9	100.93	931	931;932;932;932;932;931;932;932;929	0	26.729	2.1	2.4	2.1
Q9Y5S9	Q9Y5S9	1	1	1	RNA-binding protein 8A	RBM8A		1	1	1	1	0	0	0	0	0	0	0	1	1	0	0	0	0	0	0	0	1	1	0	0	0	0	0	0	0	1	1	5.2	5.2	5.2	19.889	174	174	0.0036232	3.0115	0	0	0
Q9Y5X1	Q9Y5X1	3	3	3	Sorting nexin-9	SNX9		1	3	3	3	0	1	0	0	2	1	1	3	1	0	1	0	0	2	1	1	3	1	0	1	0	0	2	1	1	3	1	7.4	7.4	7.4	66.591	595	595	0	10.274	0	2.4	0
Q9Y5Z4	Q9Y5Z4	6	6	6	Heme-binding protein 2	HEBP2		1	6	6	6	1	4	0	0	3	3	3	1	3	1	4	0	0	3	3	3	1	3	1	4	0	0	3	3	3	1	3	28.3	28.3	28.3	22.875	205	205	0	18.483	4.9	22	0
Q9Y617	Q9Y617	7	7	7	Phosphoserine aminotransferase	PSAT1		1	7	7	7	4	0	0	2	1	2	4	2	0	4	0	0	2	1	2	4	2	0	4	0	0	2	1	2	4	2	0	19.7	19.7	19.7	40.422	370	370	0	13.944	10.5	0	0
Q9Y639	Q9Y639	2	2	2	Neuroplastin	NPTN		1	2	2	2	0	0	0	2	0	0	1	0	0	0	0	0	2	0	0	1	0	0	0	0	0	2	0	0	1	0	0	7.5	7.5	7.5	44.387	398	398	0.0035971	2.911	0	0	0
Q9Y646	Q9Y646	7	7	7	Carboxypeptidase Q	CPQ		1	7	7	7	3	1	1	4	2	2	3	2	2	3	1	1	4	2	2	3	2	2	3	1	1	4	2	2	3	2	2	19.1	19.1	19.1	51.887	472	472	0	29.315	5.7	2.1	2.3
Q9Y662;Q9Y663;Q96QI5;Q9Y661;Q9Y278	Q9Y662;Q9Y663	18;17;4;4;2	18;17;4;4;2	17;16;3;4;2	Heparan sulfate glucosamine 3-O-sulfotransferase 3B1;Heparan sulfate glucosamine 3-O-sulfotransferase 3A1	HS3ST3B1;HS3ST3A1	;	5	18	18	17	4	13	9	4	12	12	4	14	14	4	13	9	4	12	12	4	14	14	3	12	9	3	11	11	4	13	13	42.6	42.6	40.8	43.324	390	390;406;342;456;367	0	108.86	9.2	32.8	23.3
Q9Y678	Q9Y678	4	4	4	Coatomer subunit gamma-1	COPG1		1	4	4	4	1	1	0	0	1	1	0	2	0	1	1	0	0	1	1	0	2	0	1	1	0	0	1	1	0	2	0	6.4	6.4	6.4	97.717	874	874	0	10.697	1.9	1.9	0
Q9Y680	Q9Y680	3	3	3	Peptidyl-prolyl cis-trans isomerase FKBP7	FKBP7		1	3	3	3	2	0	0	1	0	1	2	0	0	2	0	0	1	0	1	2	0	0	2	0	0	1	0	1	2	0	0	14.7	14.7	14.7	30.009	259	259	0	15.455	10.8	0	0
Q9Y696	Q9Y696	14	14	14	Chloride intracellular channel protein 4	CLIC4		1	14	14	14	8	6	4	6	4	3	9	8	4	8	6	4	6	4	3	9	8	4	8	6	4	6	4	3	9	8	4	56.1	56.1	56.1	28.772	253	253	0	118.75	38.3	26.1	18.2
Q9Y6C2	Q9Y6C2	42	42	42	EMILIN-1	EMILIN1		1	42	42	42	25	22	20	24	28	30	20	22	29	25	22	20	24	28	30	20	22	29	25	22	20	24	28	30	20	22	29	44.6	44.6	44.6	106.67	1016	1016	0	323.31	31	25.7	24.1
Q9Y6N7;Q9HCK4	Q9Y6N7	11;1	11;1	11;1	Roundabout homolog 1	ROBO1		2	11	11	11	2	2	5	3	7	6	1	2	7	2	2	5	3	7	6	1	2	7	2	2	5	3	7	6	1	2	7	9.8	9.8	9.8	180.93	1651	1651;1378	0	43.606	1.5	1.6	4.6
Q9Y6N8	Q9Y6N8	1	1	1	Cadherin-10	CDH10		1	1	1	1	1	0	0	0	0	0	0	0	0	1	0	0	0	0	0	0	0	0	1	0	0	0	0	0	0	0	0	1	1	1	88.45	788	788	1	-2	1	0	0
Q9Y6Y9	Q9Y6Y9	1	1	1	Lymphocyte antigen 96	LY96		1	1	1	1	1	1	1	1	1	1	1	1	1	1	1	1	1	1	1	1	1	1	1	1	1	1	1	1	1	1	1	6.2	6.2	6.2	18.545	160	160	0	4.1822	6.2	6.2	6.2
REV__A2RUH7	REV__A2RUH7	1	1	1				1	1	1	1	0	0	0	0	0	0	1	0	0	0	0	0	0	0	0	1	0	0	0	0	0	0	0	0	1	0	0	0	0	0	38.733	354	354	1	-2	0	0	0
REV__A6NFA0	REV__A6NFA0	1	1	1				1	1	1	1	0	0	0	1	0	0	0	0	0	0	0	0	1	0	0	0	0	0	0	0	0	1	0	0	0	0	0	0	0	0	37.612	338	338	1	-2	0	0	0
REV__A8MW92	REV__A8MW92	1	1	1				1	1	1	1	0	0	0	0	0	0	0	1	0	0	0	0	0	0	0	0	1	0	0	0	0	0	0	0	0	1	0	0	0	0	115.01	1017	1017	1	-2	0	0	0
REV__A8MXD5	REV__A8MXD5	1	1	1				1	1	1	1	0	0	0	1	0	0	0	0	0	0	0	0	1	0	0	0	0	0	0	0	0	1	0	0	0	0	0	0	0	0	32.293	290	290	1	-2	0	0	0
REV__O00505	REV__O00505	1	1	1				1	1	1	1	0	0	0	0	0	0	0	1	0	0	0	0	0	0	0	0	1	0	0	0	0	0	0	0	0	1	0	0	0	0	57.81	521	521	1	-2	0	0	0
REV__O15195	REV__O15195	1	1	1				1	1	1	1	0	0	0	1	0	0	0	0	0	0	0	0	1	0	0	0	0	0	0	0	0	1	0	0	0	0	0	0	0	0	95.906	856	856	1	-2	0	0	0
REV__O43374;REV__C9J798	REV__O43374;REV__C9J798	1;1	1;1	1;1			;	2	1	1	1	0	0	0	0	0	0	0	1	0	0	0	0	0	0	0	0	1	0	0	0	0	0	0	0	0	1	0	0	0	0	90.457	803	803;803	0.0079313	2.1505	0	0	0
REV__O94804	REV__O94804	1	1	1				1	1	1	1	0	0	0	0	0	0	0	1	0	0	0	0	0	0	0	0	1	0	0	0	0	0	0	0	0	1	0	0	0	0	112.13	968	968	1	-2	0	0	0
REV__P08F94	REV__P08F94	1	1	1				1	1	1	1	0	0	1	0	0	0	0	0	0	0	0	1	0	0	0	0	0	0	0	0	1	0	0	0	0	0	0	0	0	0	446.7	4074	4074	1	-2	0	0	0
REV__P30622	REV__P30622	1	1	1				1	1	1	1	0	0	0	0	0	0	1	0	0	0	0	0	0	0	0	1	0	0	0	0	0	0	0	0	1	0	0	0	0	0	162.24	1438	1438	0.0066489	2.1769	0	0	0
REV__P50895	REV__P50895	1	1	1				1	1	1	1	0	0	1	0	0	0	0	0	0	0	0	1	0	0	0	0	0	0	0	0	1	0	0	0	0	0	0	0	0	0	67.404	628	628	1	-2	0	0	0
REV__P52756	REV__P52756	1	1	1				1	1	1	1	0	0	0	0	0	0	0	0	1	0	0	0	0	0	0	0	0	1	0	0	0	0	0	0	0	0	1	0	0	0	92.153	815	815	0.0098749	2.118	0	0	0
REV__P61576	REV__P61576	1	1	1				1	1	1	1	0	0	0	1	0	0	0	0	0	0	0	0	1	0	0	0	0	0	0	0	0	1	0	0	0	0	0	0	0	0	11.735	105	105	0.0036311	3.0158	0	0	0
REV__P78559	REV__P78559	1	1	1				1	1	1	1	0	0	0	0	0	1	0	0	0	0	0	0	0	0	1	0	0	0	0	0	0	0	0	1	0	0	0	0	0	0	305.48	2803	2803	1	-2	0	0	0
REV__Q01082	REV__Q01082	1	1	1				1	1	1	1	0	0	0	1	0	0	0	0	0	0	0	0	1	0	0	0	0	0	0	0	0	1	0	0	0	0	0	0	0	0	274.61	2364	2364	1	-2	0	0	0
REV__Q12846	REV__Q12846	1	1	1				1	1	1	1	1	0	1	1	0	0	0	0	0	1	0	1	1	0	0	0	0	0	1	0	1	1	0	0	0	0	0	0	0	0	34.18	297	297	1	-2	0	0	0
REV__Q13683	REV__Q13683	2	2	2				1	2	2	2	1	0	0	0	0	2	1	0	0	1	0	0	0	0	2	1	0	0	1	0	0	0	0	2	1	0	0	0	0	0	128.95	1181	1181	1	-2	0	0	0
REV__Q14289	REV__Q14289	2	2	2				1	2	2	2	2	1	1	2	1	2	1	0	2	2	1	1	2	1	2	1	0	2	2	1	1	2	1	2	1	0	2	0	0	0	115.87	1009	1009	0.0022173	3.3267	0	0	0
REV__Q15436;REV__Q15437	REV__Q15436;REV__Q15437	1;1	1;1	1;1			;	2	1	1	1	0	0	0	0	0	1	0	0	0	0	0	0	0	0	1	0	0	0	0	0	0	0	0	1	0	0	0	0	0	0	86.16	765	765;767	1	-2	0	0	0
REV__Q5T1H1	REV__Q5T1H1	1	1	1				1	1	1	1	0	0	0	0	0	1	0	0	0	0	0	0	0	0	1	0	0	0	0	0	0	0	0	1	0	0	0	0	0	0	350.79	3165	3165	0.0029133	3.0535	0	0	0
REV__Q5UIP0	REV__Q5UIP0	2	2	2				1	2	2	2	0	0	0	0	1	0	1	0	0	0	0	0	0	1	0	1	0	0	0	0	0	0	1	0	1	0	0	0	0	0	274.46	2472	2472	0.0014793	3.3592	0	0	0
REV__Q86Y13	REV__Q86Y13	1	1	1				1	1	1	1	0	0	0	0	0	1	0	0	0	0	0	0	0	0	1	0	0	0	0	0	0	0	0	1	0	0	0	0	0	0	138.6	1208	1208	1	-2	0	0	0
REV__Q8NE09	REV__Q8NE09	2	2	2				1	2	2	2	0	1	1	0	0	0	1	0	1	0	1	1	0	0	0	1	0	1	0	1	1	0	0	0	1	0	1	0	0	0	147.16	1264	1264	0.0072703	2.1506	0	0	0
REV__Q8NI35	REV__Q8NI35	1	1	1				1	1	1	1	0	0	1	0	0	0	0	0	0	0	0	1	0	0	0	0	0	0	0	0	1	0	0	0	0	0	0	0	0	0	196.37	1801	1801	1	-2	0	0	0
REV__Q8TCG1	REV__Q8TCG1	2	2	2				1	2	2	2	0	1	0	0	0	1	0	0	0	0	1	0	0	0	1	0	0	0	0	1	0	0	0	1	0	0	0	0	0	0	102.18	905	905	0.0041667	2.5489	0	0	0
REV__Q96KG7	REV__Q96KG7	1	1	1				1	1	1	1	0	0	0	0	1	1	0	0	1	0	0	0	0	1	1	0	0	1	0	0	0	0	1	1	0	0	1	0	0	0	122.2	1140	1140	1	-2	0	0	0
REV__Q9H254	REV__Q9H254	1	1	1				1	1	1	1	0	1	1	0	0	0	0	0	0	0	1	1	0	0	0	0	0	0	0	1	1	0	0	0	0	0	0	0	0	0	288.98	2564	2564	0.0085922	2.1461	0	0	0
REV__Q9H3E2	REV__Q9H3E2	2	2	2				1	2	2	2	2	1	1	1	1	1	2	1	1	2	1	1	1	1	1	2	1	1	2	1	1	1	1	1	2	1	1	0	0	0	97.944	840	840	0.0007657	3.7761	0	0	0
REV__Q9H609	REV__Q9H609	1	1	1				1	1	1	1	0	0	0	0	1	0	0	0	0	0	0	0	0	1	0	0	0	0	0	0	0	0	1	0	0	0	0	0	0	0	18.89	170	170	1	-2	0	0	0
REV__Q9H902	REV__Q9H902	1	1	1				1	1	1	1	1	1	1	1	0	0	1	0	0	1	1	1	1	0	0	1	0	0	1	1	1	1	0	0	1	0	0	0	0	0	22.254	201	201	0.0092409	2.1421	0	0	0
REV__Q9HD33	REV__Q9HD33	1	1	1				1	1	1	1	0	1	0	0	0	0	0	0	0	0	1	0	0	0	0	0	0	0	0	1	0	0	0	0	0	0	0	0	0	0	29.45	250	250	1	-2	0	0	0
REV__Q9P2I0	REV__Q9P2I0	1	1	1				1	1	1	1	0	0	1	0	1	0	0	0	0	0	0	1	0	1	0	0	0	0	0	0	1	0	1	0	0	0	0	0	0	0	88.486	782	782	0.005988	2.1874	0	0	0
REV__Q9UGM3	REV__Q9UGM3	1	1	1				1	1	1	1	0	0	0	0	1	0	0	0	0	0	0	0	0	1	0	0	0	0	0	0	0	0	1	0	0	0	0	0	0	0	260.73	2413	2413	1	-2	0	0	0
REV__Q9UKL3	REV__Q9UKL3	1	1	1				1	1	1	1	0	1	1	0	0	0	0	0	0	0	1	1	0	0	0	0	0	0	0	1	1	0	0	0	0	0	0	0	0	0	222.66	1982	1982	0.0054018	2.3175	0	0	0
REV__Q9UKT4	REV__Q9UKT4	1	1	1				1	1	1	1	0	0	0	0	0	0	1	0	0	0	0	0	0	0	0	1	0	0	0	0	0	0	0	0	1	0	0	0	0	0	50.146	447	447	1	-2	0	0	0
REV__Q9Y2K3	REV__Q9Y2K3	2	2	2				1	2	2	2	2	0	0	1	0	0	1	0	0	2	0	0	1	0	0	1	0	0	2	0	0	1	0	0	1	0	0	0	0	0	224.62	1946	1946	0.0047749	2.3918	0	0	0
REV__Q9Y4L5	REV__Q9Y4L5	1	1	1				1	1	1	1	0	0	1	0	0	0	0	0	0	0	0	1	0	0	0	0	0	0	0	0	1	0	0	0	0	0	0	0	0	0	33.703	304	304	1	-2	0	0	0
[truncated: 59 more columns]

## Sheet: Suppl. Table 2C
Protein.names	Gene.names	log2FC MIR31HG_vs_CTRL	SAM.pval_MIR31HG	Razor_peptide_CTRL1A	Razor_peptide_CTRL2A	Razor_peptide_MIR31HG_1A	Razor_peptide_MIR31HG_2A	Razor_peptide_CTRL1B	Razor_peptide_CTRL2B	Razor_peptide_CTRL3B	Razor_peptide_MIR31HG_1B	Razor_peptide_MIR31HG_2B	Razor_peptide_MIR31HG_3B	MW	LFQ_CTRL1A	LFQ_CTRL2A	LFQ_MIR31HG_1A	LFQ_MIR31HG_2A	LFQ_CTRL1B	LFQ_CTRL2B	LFQ_CTRL3B	LFQ_MIR31HG_1B	LFQ_MIR31HG_2B	LFQ_MIR31HG_3B
Poly(rC)-binding protein 2;Poly(rC)-binding protein 3	PCBP2	8.71032	0.0117083	1	2	2	6	1	0	0	7	6	6	33.8	420790	420790	420790	162090000	420790	420790	420790	199460000	317360000	201930000
Nuclease-sensitive element-binding protein 1	YBX1	6.03048	0.040625	0	0	0	5	0	0	0	2	2	3	34.028	420790	420790	420790	16895000	420790	420790	420790	19475000	52754000	47983000
Far upstream element-binding protein 3	FUBP3	5.74854	0.0921667	0	0	1	3	0	0	0	4	1	3	61.64	420790	420790	420790	46358000	420790	420790	420790	18477000	420790	47438000
Heterogeneous nuclear ribonucleoprotein H3	HNRNPH3	5.06732	0.296542	0	0	1	4	0	0	0	1	1	2	31.525	420790	420790	420790	13912000	420790	420790	420790	420790	420790	55368000
40S ribosomal protein S3	RPS3	4.46181	0.315583	1	3	1	6	1	0	1	2	0	1	26.688	420790	420790	420790	18010000	420790	420790	420790	27091000	420790	420790
Heterogeneous nuclear ribonucleoprotein A3	HNRNPA3	4.18886	0.355292	1	1	2	3	0	0	2	1	0	2	39.594	420790	420790	15266000	420790	420790	420790	420790	420790	420790	21843000
Probable ATP-dependent RNA helicase DDX17	DDX17	4.16539	0.350458	1	1	1	8	1	0	0	3	0	3	80.439	420790	420790	420790	16740000	420790	420790	420790	420790	420790	19750000
Keratin, type I cuticular Ha1;Keratin, type I cuticular Ha3-II;Keratin, type I cuticular Ha2	KRT31	3.51934	0.311	3	0	0	0	0	0	0	0	0	6	47.237	154650000	420790	420790	420790	420790	420790	420790	420790	420790	1790900000
Polypyrimidine tract-binding protein 1	PTBP1	3.30223	0.0221667	1	5	4	12	2	1	1	4	2	4	57.221	420790	18967000	92603000	239860000	10853000	420790	21898000	93230000	57267000	35509000
Heterogeneous nuclear ribonucleoprotein M	HNRNPM	2.96206	0.0106667	3	8	11	9	10	0	8	14	7	12	77.569	9138700	40788000	242560000	59192000	30432000	420790	22735000	241320000	104310000	159240000
Heterogeneous nuclear ribonucleoproteins C1/C2;Heterogeneous nuclear ribonucleoprotein C-like 1;Heterogeneous nuclear ribonucleoprotein C-like 2	HNRNPC	2.86673	0.00908333	1	3	2	10	2	0	3	7	2	4	28.916	420790	21442000	79767000	100670000	25845000	420790	30497000	168700000	155570000	68794000
Heterogeneous nuclear ribonucleoproteins A2/B1	HNRNPA2B1	2.82051	0.03325	2	5	2	11	2	0	6	4	1	3	37.429	11181000	18541000	18342000	207750000	32243000	420790	19929000	190040000	420790	164930000
Staphylococcal nuclease domain-containing protein 1	SND1	2.71717	0.127333	1	3	4	15	1	0	1	5	1	0	102	420790	19852000	54821000	61712000	420790	420790	420790	24237000	420790	420790
Heterogeneous nuclear ribonucleoprotein H;Heterogeneous nuclear ribonucleoprotein H, N-terminally processed	HNRNPH1	2.5109	0.029375	0	1	2	6	1	1	5	4	3	3	51.229	420790	420790	420790	77178000	420790	420790	52121000	59661000	100170000	69240000
Integrin alpha-2	ITGA2	2.40424	0.321333	3	2	0	7	3	1	2	3	1	2	129.29	420790	3981900	420790	58437000	4918500	420790	6125700	5782900	420790	18935000
Heterogeneous nuclear ribonucleoprotein U	HNRNPU	2.32588	0.260792	2	5	0	9	2	0	2	6	0	2	88.979	6811200	13347000	420790	124710000	420790	420790	14939000	54214000	420790	420790
ATP-dependent RNA helicase A	DHX9	2.25519	0.252083	1	5	3	13	2	1	2	4	0	1	140.96	420790	14241000	13852000	77080000	4127500	420790	5881100	28011000	420790	420790
ELAV-like protein 1	ELAVL1	2.08507	0.1945	0	1	2	4	3	0	2	3	1	1	36.091	420790	420790	42172000	25306000	5634700	420790	16170000	29553000	420790	420790
Plasminogen activator inhibitor 2	SERPINB2	2.06521	0.0831667	0	5	2	7	1	0	4	3	0	3	46.596	420790	12376000	18739000	42917000	420790	420790	27220000	41823000	420790	67090000
Far upstream element-binding protein 2	KHSRP	1.96512	0.070875	2	3	2	6	3	0	2	5	1	4	73.027	6082300	9199100	36759000	24048000	16743000	420790	420790	27676000	420790	39420000
Heterogeneous nuclear ribonucleoprotein K	HNRNPK	1.93702	0.0103333	1	3	5	10	2	0	3	8	8	9	47.557	420790	19921000	69150000	146210000	66465000	420790	59907000	95638000	139320000	113080000
Sodium/potassium-transporting ATPase subunit alpha-1	ATP1A1	1.67975	0.5205	1	3	1	11	0	1	0	3	1	2	109.55	420790	20510000	420790	60244000	420790	420790	420790	420790	420790	9594400
60S ribosomal protein L15;Ribosomal protein L15	RPL15	1.56563	0.583375	1	1	1	3	1	1	2	1	0	1	24.146	420790	420790	420790	70383000	420790	420790	22663000	420790	420790	420790
Heterogeneous nuclear ribonucleoprotein Q	SYNCRIP	1.55561	0.0450833	4	4	3	8	5	0	6	5	2	4	58.735	28543000	15411000	36615000	57206000	41826000	420790	36472000	141200000	90963000	34622000
RNA-binding motif protein, X chromosome;RNA-binding motif protein, X chromosome, N-terminally processed;RNA binding motif protein, X-linked-like-1	RBMX	1.55183	0.13225	1	4	2	6	1	0	5	4	1	4	42.331	420790	22736000	39138000	26838000	420790	420790	21129000	39221000	420790	26691000
Keratin, type II cuticular Hb3;Keratin, type II cuticular Hb1;Putative keratin-87 protein	KRT83	1.50568	0.454583	5	0	0	0	0	0	2	2	0	10	54.195	394230000	420790	420790	420790	420790	420790	420790	111270000	420790	1011700000
Prelamin-A/C;Lamin-A/C	LMNA	1.36996	0.131208	7	9	7	18	4	2	5	8	2	5	74.139	40733000	102790000	93987000	210510000	420790	27347000	16566000	46034000	420790	134590000
40S ribosomal protein S21	RPS21	1.28626	0.758167	1	2	1	1	1	1	1	1	1	2	8.85	420790	6117000	420790	420790	420790	420790	420790	420790	420790	17341000
Clathrin heavy chain 1	CLTC	1.22538	0.546167	0	5	0	16	0	0	4	1	1	3	192.06	420790	23314000	420790	64881000	420790	420790	11442000	420790	420790	18074000
60S ribosomal protein L13a	RPL13A	1.18508	0.714833	1	1	0	5	2	0	2	1	0	0	23.577	420790	420790	420790	30232000	4451400	420790	8322500	420790	420790	420790
Intercellular adhesion molecule 1	ICAM1	1.13192	0.676542	1	4	1	9	1	1	2	2	0	0	57.825	420790	9767700	420790	50238000	420790	420790	12662000	420790	420790	420790
Dolichyl-diphosphooligosaccharide--protein glycosyltransferase subunit 1	RPN1	1.06905	0.504083	2	6	2	17	1	0	5	2	0	0	68.569	15280000	25189000	26000000	96373000	420790	420790	22173000	9977200	420790	420790
Splicing factor U2AF 35 kDa subunit	U2AF1	1.05724	0.65075	0	2	1	3	1	0	2	0	0	2	27.872	420790	33322000	420790	62447000	420790	420790	420790	420790	420790	9134700
Filamin-A	FLNA	1.00734	0.381417	5	9	2	20	5	1	4	4	0	4	280.01	18381000	39790000	46448000	101350000	17555000	420790	14532000	10862000	420790	23202000
Endoplasmin	HSP90B1	0.975133	0.423875	6	10	1	16	2	0	6	4	0	2	92.468	19598000	51032000	420790	135740000	33242000	420790	8999500	37780000	420790	48351000
Cytoskeleton-associated protein 4	CKAP4	0.960356	0.477542	3	8	1	10	2	0	6	7	1	4	66.022	20016000	36899000	420790	89625000	420790	420790	19141000	43908000	420790	15252000
Protein disulfide-isomerase	P4HB	0.847507	0.707875	2	6	1	12	1	0	3	1	1	2	51.125	420790	35992000	420790	91094000	420790	420790	14306000	420790	420790	420790
Vimentin	VIM	0.811424	0.339417	23	33	10	45	17	1	28	16	3	15	53.651	735530000	1590700000	826630000	3563300000	643860000	420790	707080000	867340000	64190000	1132500000
Heterogeneous nuclear ribonucleoprotein A1;Heterogeneous nuclear ribonucleoprotein A1, N-terminally processed;Heterogeneous nuclear ribonucleoprotein A1-like 2	HNRNPA1	0.800803	0.634583	0	3	1	7	1	0	3	3	1	1	33.155	420790	35761000	420790	96688000	420790	420790	36029000	29312000	420790	420790
Moesin	MSN	0.800149	0.616375	3	12	1	17	4	0	5	5	2	2	67.819	21567000	110970000	420790	238590000	22058000	420790	16445000	58709000	420790	420790
High mobility group protein HMG-I/HMG-Y	HMGA1	0.779462	0.439083	3	3	3	3	1	1	5	3	2	2	11.676	43687000	420790	33219000	420790	420790	420790	90450000	49896000	96766000	52110000
Neutral alpha-glucosidase AB	GANAB	0.728297	0.72075	4	5	0	15	0	0	3	1	1	0	106.87	24395000	44610000	420790	144530000	420790	420790	18410000	420790	420790	420790
Protein SON	SON	0.6777	0.510833	3	5	2	4	5	2	7	4	2	1	232.3	14321000	11474000	16353000	13094000	7610600	420790	18687000	19921000	34211000	420790
Splicing factor U2AF 65 kDa subunit	U2AF2	0.653855	0.390417	1	2	2	5	2	1	6	2	2	2	53.12	22074000	25276000	37087000	25929000	420790	420790	43698000	20469000	41492000	19599000
60S ribosomal protein L6	RPL6	0.630225	0.614375	2	7	0	10	0	0	3	2	0	2	32.728	99546000	50754000	420790	188820000	420790	420790	36746000	33347000	420790	67805000
Serine/arginine repetitive matrix protein 2	SRRM2	0.613033	0.122	17	20	10	28	15	5	23	15	7	13	299.61	568930000	359020000	519910000	643490000	452970000	33618000	297910000	450600000	231400000	773740000
Aminopeptidase N	ANPEP	0.594242	0.570667	5	7	3	21	2	1	11	5	0	5	109.54	50042000	125090000	35093000	212190000	18522000	420790	43759000	36847000	420790	74502000
Nucleolin	NCL	0.588265	0.566042	2	4	1	8	4	0	6	5	0	4	76.613	14817000	14433000	420790	43455000	30654000	420790	45970000	74866000	420790	40645000
Voltage-dependent anion-selective channel protein 1	VDAC1	0.578291	0.783333	2	1	0	7	1	1	3	2	1	2	30.772	420790	420790	420790	27867000	420790	420790	32113000	420790	420790	21331000
Annexin A6;Annexin	ANXA6	0.558233	0.853792	0	1	0	9	0	0	3	0	0	0	72.423	420790	420790	420790	30620000	420790	420790	20255000	420790	420790	420790
Putative RNA-binding protein Luc7-like 2	LUC7L2	0.505169	0.247	3	7	4	6	4	2	6	4	3	5	46.513	44448000	57742000	63945000	53582000	51766000	420790	90166000	62920000	93916000	72714000
Myosin-9	MYH9	0.396331	0.767542	8	9	2	26	2	1	8	10	1	2	226.53	34780000	78714000	11492000	129440000	420790	420790	25368000	28054000	420790	14465000
Peptidyl-prolyl cis-trans isomerase B	PPIB	0.374712	0.888792	0	1	1	4	1	0	2	2	0	1	23.742	420790	420790	420790	59045000	420790	420790	45154000	420790	420790	420790
ATP synthase subunit alpha, mitochondrial	ATP5A1	0.287253	0.798125	7	8	1	12	6	0	6	6	1	1	59.75	53588000	62400000	420790	163710000	40494000	420790	51239000	89026000	420790	420790
60S ribosomal protein L4	RPL4	0.171297	0.915958	2	2	2	11	2	1	2	1	1	2	47.697	25904000	47617000	30866000	89853000	18575000	420790	15808000	420790	420790	420790
Actin, cytoplasmic 1;Actin, cytoplasmic 1, N-terminally processed;Actin, alpha skeletal muscle;Actin, alpha cardiac muscle 1;Actin, gamma-enteric smooth muscle;Actin, aortic smooth muscle	ACTB	0.137595	0.810083	12	12	6	17	9	2	11	10	4	7	41.736	1321900000	928410000	646460000	1519000000	333740000	138720000	747420000	488870000	161020000	1002100000
40S ribosomal protein S8	RPS8	0.114715	0.916958	3	5	1	7	3	0	3	3	0	2	21.879	24178000	17386000	420790	34042000	33968000	420790	39062000	51841000	420790	37809000
Putative elongation factor 1-alpha-like 3;Elongation factor 1-alpha 1;Elongation factor 1-alpha 2	EEF1A1P5	0.10764	0.944458	3	5	1	7	2	0	3	3	0	1	50.184	44056000	44896000	420790	111860000	43117000	420790	39662000	72365000	420790	420790
Keratin, type I cytoskeletal 14	KRT14	0.0977104	0.946792	1	6	1	4	4	1	8	4	2	4	51.621	420790	25563000	420790	11901000	64600000	420790	18911000	32107000	29624000	43565000
Annexin A2;Annexin;Putative annexin A2-like protein	ANXA2	0.0894458	0.878833	10	9	5	19	8	1	12	7	3	4	38.604	123070000	148510000	157000000	180600000	128610000	420790	112890000	111220000	38368000	59157000
Heat shock protein HSP 90-beta	HSP90AB1	0.0735002	0.974375	3	8	1	10	3	0	3	4	0	1	83.263	20116000	38410000	420790	65031000	17578000	420790	11975000	26832000	420790	420790
Histone H1.5	HIST1H1B	0.0350651	0.95575	6	8	5	9	9	3	16	14	6	8	22.58	900550000	476790000	1663000000	1169700000	1252300000	445470000	2234800000	1284100000	419880000	903870000
Serine/arginine-rich splicing factor 7	SRSF7	-0.0162265	0.999458	3	4	1	8	2	0	6	2	0	2	26.928	124710000	40515000	420790	47592000	71593000	420790	57924000	73928000	420790	169500000
Ubiquitin-40S ribosomal protein S27a;Ubiquitin;40S ribosomal protein S27a;Ubiquitin-60S ribosomal protein L40;Ubiquitin;60S ribosomal protein L40;Polyubiquitin-B;Ubiquitin;Polyubiquitin-C;Ubiquitin	RPS27A	-0.0354681	0.996208	1	4	1	6	0	0	3	1	0	1	17.965	420790	64359000	420790	121350000	420790	420790	60474000	420790	420790	420790
Serine/arginine-rich splicing factor 2	SRSF2	-0.0685838	0.972167	3	6	2	4	3	0	6	5	0	0	15.156	22711000	259440000	50081000	261650000	53208000	420790	85537000	89184000	420790	420790
Interstitial collagenase;22 kDa interstitial collagenase;27 kDa interstitial collagenase	MMP1	-0.152045	0.891792	3	4	0	8	2	0	6	3	1	2	54.006	17669000	76003000	420790	83239000	25509000	420790	67191000	35796000	420790	48232000
Galectin-1	LGALS1	-0.168806	0.823167	5	5	2	7	2	0	4	3	1	2	14.716	246650000	256100000	117560000	325000000	49312000	420790	191810000	65456000	420790	153670000
Heat shock cognate 71 kDa protein;Heat shock-related 70 kDa protein 2	HSPA8	-0.178593	0.920833	1	4	1	9	4	0	3	3	0	0	70.897	420790	21361000	420790	30889000	21402000	420790	13519000	18321000	420790	420790
Basement membrane-specific heparan sulfate proteoglycan core protein;Endorepellin;LG3 peptide	HSPG2	-0.183289	0.903958	18	18	5	28	1	0	2	1	0	0	468.83	186400000	106770000	109640000	162600000	420790	420790	16542000	420790	420790	420790
Serine/arginine-rich splicing factor 1	SRSF1	-0.19395	0.750083	7	8	3	8	4	1	10	5	2	2	28.329	108180000	89524000	74214000	86543000	169220000	420790	133780000	151080000	420790	125830000
40S ribosomal protein S23	RPS23	-0.20438	0.940042	1	3	0	4	0	0	2	0	0	0	14.837	420790	51637000	420790	59912000	420790	420790	18070000	420790	420790	420790
Pyruvate kinase PKM;Pyruvate kinase	PKM	-0.214869	0.836458	5	10	1	14	6	0	7	5	0	3	57.936	49422000	63685000	420790	112660000	42527000	420790	49750000	63404000	420790	420790
Stress-70 protein, mitochondrial	HSPA9	-0.284693	0.914833	1	3	1	7	1	0	3	2	0	0	73.68	420790	19202000	420790	15640000	420790	420790	9440100	7646700	420790	420790
60S ribosomal protein L27a	RPL27A	-0.313036	0.924458	1	1	0	2	1	0	2	1	0	0	10.127	420790	420790	420790	26639000	420790	420790	33502000	420790	420790	420790
Histone H2B;Histone H2B type 1-M;Histone H2B type 1-N;Histone H2B type 1-H;Histone H2B type 2-F;Histone H2B type 2-E;Histone H2B type 1-C/E/F/G/I;Histone H2B type 1-D;Histone H2B type 1-B;Histone H2B type 1-O;Histone H2B type 1-J;Histone H2B type 1-K;Histone H2B type 1-L;Histone H2B type F-S;Histone H2B type 3-B;Histone H2B type 1-A	HIST1H2BN	-0.322604	0.762	4	4	3	5	2	0	5	3	1	2	18.804	150300000	215610000	176110000	133520000	118530000	420790	738920000	615820000	420790	52695000
Histone H1.0;Histone H1.0, N-terminally processed	H1F0	-0.326245	0.468417	5	7	4	7	6	0	6	4	3	5	20.863	1115000000	1125000000	959580000	808140000	693500000	420790	1411200000	724750000	468000000	505240000
Serine/arginine repetitive matrix protein 1	SRRM1	-0.352272	0.719458	2	3	0	2	3	1	4	3	3	3	103.39	52143000	26122000	420790	10939000	246360000	420790	155410000	182570000	118070000	64365000
Serine/arginine-rich splicing factor 4	SRSF4	-0.353511	0.763083	3	5	4	4	1	0	3	3	0	0	56.678	29512000	36601000	20602000	24631000	420790	420790	65659000	57719000	420790	420790
Serine/threonine-protein kinase PRP4 homolog	PRPF4B	-0.368387	0.591625	3	4	1	8	4	1	11	3	3	4	116.99	73119000	32296000	420790	36222000	66671000	420790	93437000	54370000	50898000	64102000
Keratin, type II cytoskeletal 2 epidermal	KRT2	-0.371638	0.477	17	30	6	24	18	5	30	17	12	13	65.432	396820000	763350000	43742000	254800000	818690000	128000000	907630000	503470000	652080000	875820000
40S ribosomal protein S28	RPS28	-0.376642	0.932708	1	1	1	2	0	0	2	0	0	1	7.8409	420790	420790	420790	12778000	420790	420790	17092000	420790	420790	420790
Tubulin alpha-1C chain;Tubulin alpha-1B chain;Tubulin alpha-1A chain;Tubulin alpha-3C/D chain;Tubulin alpha-4A chain;Tubulin alpha-3E chain	TUBA1C	-0.419094	0.670917	4	6	3	11	1	0	5	3	0	1	57.73	156910000	78973000	73605000	107580000	420790	420790	77100000	52681000	420790	420790
60S ribosomal protein L23a	RPL23A	-0.419657	0.829208	1	3	0	4	0	0	2	1	0	0	17.695	420790	44169000	420790	49095000	420790	420790	22490000	420790	420790	420790
Serine/arginine-rich splicing factor 11	SRSF11	-0.428399	0.812	1	3	0	2	1	0	3	2	0	0	42.316	420790	17521000	420790	12886000	420790	420790	37356000	27568000	420790	420790
Histone H3;Histone H3.2;Histone H3.1t;Histone H3.3;Histone H3.1;Histone H3.3C	H3F3B	-0.521211	0.668667	2	3	1	4	2	0	2	1	0	1	10.334	218670000	324900000	420790	727400000	219880000	420790	282480000	420790	420790	420790
U1 small nuclear ribonucleoprotein 70 kDa	SNRNP70	-0.551101	0.534917	4	6	2	7	2	0	7	2	0	0	51.556	50319000	46540000	49100000	34891000	18540000	420790	44908000	24864000	420790	420790
78 kDa glucose-regulated protein	HSPA5	-0.552029	0.633542	4	7	1	14	4	0	10	6	2	2	72.332	33809000	47182000	420790	74301000	14452000	420790	53172000	26088000	420790	420790
Transformer-2 protein homolog beta	TRA2B	-0.563202	0.768583	2	2	0	5	1	0	2	1	0	1	21.935	14903000	13956000	420790	33751000	420790	420790	22655000	420790	420790	420790
Histone H2A type 1-J;Histone H2A type 1-H;Histone H2A.J;Histone H2A type 1-D;Histone H2A type 1;Histone H2A;Histone H2A type 2-C;Histone H2A type 2-A;Histone H2A type 1-C;Histone H2A type 3;Histone H2A type 1-B/E;Histone H2AX;Histone H2A type 2-B;Histone H2A type 1-A	HIST1H2AJ	-0.607087	0.556042	3	4	1	4	1	0	5	2	1	1	13.936	128340000	88174000	420790	123750000	420790	420790	120590000	96856000	420790	420790
60S ribosomal protein L18	RPL18	-0.609038	0.592958	2	4	0	6	2	0	3	2	1	1	18.756	17043000	23943000	420790	44542000	30377000	420790	39018000	26841000	420790	420790
Histone H1.4	HIST1H1E	-0.645995	0.45675	5	7	3	6	7	3	9	7	3	5	21.865	200140000	83718000	178440000	344880000	295260000	196730000	1214600000	344040000	175770000	228870000
60S ribosomal protein L3	RPL3	-0.648465	0.645583	0	4	1	6	4	0	3	3	0	1	46.108	420790	69413000	420790	42833000	21219000	420790	24685000	30009000	420790	420790
Histone H4	HIST1H4A	-0.653398	0.569708	3	4	1	5	2	0	4	2	0	0	11.367	186050000	195930000	420790	367880000	75194000	420790	151620000	18185000	420790	420790
Transformer-2 protein homolog alpha	TRA2A	-0.75001	0.847708	1	1	0	2	0	0	3	1	0	0	20.589	420790	420790	420790	8714100	420790	420790	15803000	420790	420790	420790
RNA-binding protein with serine-rich domain 1	RNPS1	-0.780621	0.534292	3	4	1	2	1	0	4	3	1	1	24.561	30503000	36197000	420790	26929000	420790	420790	39771000	34277000	420790	420790
Bcl-2-associated transcription factor 1	BCLAF1	-0.811177	0.361083	7	7	3	7	4	0	8	4	0	3	83.231	69675000	148590000	32002000	74558000	17021000	420790	79846000	44414000	420790	28444000
High mobility group protein HMGI-C	HMGA2	-0.818205	0.818375	0	1	1	2	0	0	2	0	0	0	10.767	420790	420790	420790	9928700	420790	420790	18791000	420790	420790	420790
Glyceraldehyde-3-phosphate dehydrogenase	GAPDH	-0.82639	0.365792	3	6	1	9	4	0	3	4	1	1	36.053	36789000	65902000	420790	85328000	72487000	420790	79575000	57312000	420790	420790
Probable ATP-dependent RNA helicase DDX46	DDX46	-0.907716	0.362958	5	6	0	8	8	0	10	6	0	4	117.36	24597000	18930000	420790	25851000	67743000	420790	39503000	23244000	420790	30654000
Keratin, type I cytoskeletal 10	KRT10	-0.926348	0.08725	22	23	7	25	20	3	24	17	6	8	59.51	629280000	1222800000	176140000	370860000	1186000000	160430000	1464400000	575300000	261870000	1069400000
Ribosomal protein L19;60S ribosomal protein L19	RPL19	-0.997106	0.513	2	3	1	4	1	0	2	1	0	1	23.134	81384000	102840000	420790	98802000	420790	420790	15502000	420790	420790	420790
40S ribosomal protein S30	FAU	-1.13267	0.313625	2	3	1	4	1	0	4	2	1	1	10.905	337210000	199880000	420790	472620000	69103000	420790	508610000	34737000	420790	420790
Arginine and glutamate-rich protein 1	ARGLU1	-1.15591	0.0649167	10	14	6	12	10	1	12	6	2	2	33.216	817370000	1354700000	366940000	672960000	670820000	420790	1182400000	544440000	21138000	201190000
60S ribosomal protein L13	RPL13	-1.19921	0.374833	1	4	1	4	4	0	7	6	1	2	24.261	420790	45488000	420790	30734000	21600000	420790	44793000	17096000	420790	420790
Multiple myeloma tumor-associated protein 2	MMTAG2	-1.28063	0.123708	3	4	1	7	3	1	6	4	1	2	20.536	95907000	63332000	420790	31448000	43606000	420790	123910000	51248000	420790	51133000
Luc7-like protein 3	LUC7L3	-1.28269	0.743292	0	1	0	4	2	0	4	0	1	0	58.22	420790	420790	420790	7156100	420790	420790	19822000	420790	420790	420790
RNA-binding protein 39	RBM39	-1.32918	0.232417	3	4	3	4	4	0	9	2	0	0	57.089	33038000	17277000	30725000	21561000	40346000	420790	100400000	23081000	420790	420790
Keratin, type II cytoskeletal 1	KRT1	-1.39479	0.177417	16	24	7	24	24	3	32	18	13	17	66.038	723750000	1543400000	83646000	261770000	6148500000	176990000	2010000000	1007900000	1769200000	909670000
U2 snRNP-associated SURP motif-containing protein	U2SURP	-1.48905	0.159208	4	9	1	11	4	1	3	2	0	0	118.23	70009000	56979000	420790	34401000	14013000	420790	45711000	31002000	420790	420790
Collagen alpha-3(VI) chain	COL6A3	-1.49871	0.288917	31	40	9	61	7	2	12	9	2	3	321.35	673410000	1153200000	25298000	576380000	25663000	6990000	20765000	26535000	24460000	12610000
Nucleolar protein of 40 kDa	ZCCHC17	-1.53183	0.600125	1	2	1	4	0	0	6	0	1	1	20.451	420790	420790	420790	20889000	420790	420790	63585000	420790	420790	420790
Cofilin-1	CFL1	-1.70278	0.217333	2	2	1	2	2	1	2	2	1	1	18.502	21091000	15299000	420790	420790	22191000	420790	22452000	23339000	420790	420790
Keratin, type I cytoskeletal 9	KRT9	-1.84476	0.0971667	14	15	6	11	16	3	20	13	8	10	62.064	437830000	598010000	90046000	63564000	3005000000	494790000	735440000	352690000	748370000	212810000
Activated RNA polymerase II transcriptional coactivator p15	SUB1	-1.86646	0.259458	2	2	1	2	1	1	3	2	1	1	14.395	97804000	62271000	420790	27676000	420790	420790	9253900	17730000	420790	420790
Fibronectin;Anastellin;Ugl-Y1;Ugl-Y2;Ugl-Y3	FN1	-1.885	0.306167	56	40	20	59	9	1	26	15	3	9	256.5	14056000000	2324900000	1197300000	2833300000	141140000	420790	523100000	356370000	15204000	212810000
Keratin, type II cytoskeletal 5	KRT5	-1.95614	0.105875	5	9	0	4	10	0	5	5	2	2	62.378	25055000	50008000	420790	14401000	90920000	420790	34784000	36186000	420790	420790
Serine/arginine-rich splicing factor 3	SRSF3	-2.23583	0.138125	4	2	3	4	4	0	8	4	2	3	14.203	490240000	52048000	22749000	140020000	420790	420790	618600000	72066000	420790	11379000
U4/U6.U5 small nuclear ribonucleoprotein 27 kDa protein	SNRNP27	-4.05562	0.388375	2	1	0	1	2	0	2	2	0	0	18.86	420790	420790	420790	420790	20823000	420790	12901000	420790	420790	420790
Pre-mRNA-splicing factor 38A	PRPF38A	-4.11879	0.367875	2	1	1	1	2	0	3	2	0	0	37.476	420790	420790	420790	420790	19014000	420790	16276000	420790	420790	420790
Keratin, type II cytoskeletal 74;Keratin, type II cytoskeletal 73;Keratin, type II cytoskeletal 72;Keratin, type II cytoskeletal 71	KRT74	-8.20191	0.117292	1	1	0	0	1	0	1	1	0	1	57.865	420790	38881000	420790	420790	451140000	420790	128660000	420790	420790	420790

## Sheet: Suppl. Table 2D
Protein IDs	Majority protein IDs	Peptide counts (all)	Peptide counts (razor+unique)	Peptide counts (unique)	Protein names	Gene names	Fasta headers	Number of proteins	Peptides	Razor + unique peptides	Unique peptides	Peptides Ctrl1	Peptides Ctrl2	Peptides MIR31_1	Peptides MIR31_2	Peptides Cm1_vs2	Peptides Cm2_vs2	Peptides Cm3_vs2	Peptides M1_vs2	Peptides M2_vs2	Peptides M3_vs2	Razor + unique peptides Ctrl1	Razor + unique peptides Ctrl2	Razor + unique peptides MIR31_1	Razor + unique peptides MIR31_2	Razor + unique peptides Cm1_vs2	Razor + unique peptides Cm2_vs2	Razor + unique peptides Cm3_vs2	Razor + unique peptides M1_vs2	Razor + unique peptides M2_vs2	Razor + unique peptides M3_vs2	Unique peptides Ctrl1	Unique peptides Ctrl2	Unique peptides MIR31_1	Unique peptides MIR31_2	Unique peptides Cm1_vs2	Unique peptides Cm2_vs2	Unique peptides Cm3_vs2	Unique peptides M1_vs2	Unique peptides M2_vs2	Unique peptides M3_vs2	Sequence coverage [%]	Unique + razor sequence coverage [%]	Unique sequence coverage [%]	Mol. weight [kDa]	Sequence length	Sequence lengths	Q-value	Score
A0A075B6F6;Q8TCT9-5;Q8TCT9;Q8TCT9-4;Q8TCT9-2	A0A075B6F6;Q8TCT9-5;Q8TCT9;Q8TCT9-4;Q8TCT9-2	1;1;1;1;1	1;1;1;1;1	1;1;1;1;1	Minor histocompatibility antigen H13	HM13	>tr|A0A075B6F6|A0A075B6F6_HUMAN Minor histocompatibility antigen H13 (Fragment) OS=Homo sapiens GN=HM13 PE=1 SV=1;>sp|Q8TCT9-5|HM13_HUMAN Isoform 5 of Minor histocompatibility antigen H13 OS=Homo sapiens GN=HM13;>sp|Q8TCT9|HM13_HUMAN Minor histocompatibili	5	1	1	1	0	0	0	0	0	0	0	0	0	1	0	0	0	0	0	0	0	0	0	1	0	0	0	0	0	0	0	0	0	1	4.4	4.4	4.4	30.162	272	272;335;377;394;426	0.0018416	6.653
F8WBC0;F5H4H0;F5GYH7;F5H077;F5GWU8;F5H491;F5H0B7;F5H500;F5H6R7;F5H004;A0A075B6Q0;F5GYB5;F5GX62;E7ESV4;F5H7Y6;P61224-2;P61224-4;P61224-3;P62834;P61224	F8WBC0;F5H4H0;F5GYH7;F5H077;F5GWU8;F5H491;F5H0B7;F5H500;F5H6R7;F5H004;A0A075B6Q0;F5GYB5;F5GX62;E7ESV4;F5H7Y6;P61224-2;P61224-4;P61224-3;P62834;P61224	1;1;1;1;1;1;1;1;1;1;1;1;1;1;1;1;1;1;1;1	1;1;1;1;1;1;1;1;1;1;1;1;1;1;1;1;1;1;1;1	1;1;1;1;1;1;1;1;1;1;1;1;1;1;1;1;1;1;1;1	Ras-related protein Rap-1b;Ras-related protein Rap-1A	RAP1B;RAP1A	>tr|F8WBC0|F8WBC0_HUMAN Ras-related protein Rap-1b (Fragment) OS=Homo sapiens GN=RAP1B PE=4 SV=1;>tr|F5H4H0|F5H4H0_HUMAN Ras-related protein Rap-1b (Fragment) OS=Homo sapiens GN=RAP1B PE=4 SV=1;>tr|F5GYH7|F5GYH7_HUMAN Ras-related protein Rap-1b (Fragment)	20	1	1	1	0	0	0	1	0	0	0	0	0	0	0	0	0	1	0	0	0	0	0	0	0	0	0	1	0	0	0	0	0	0	34.4	34.4	34.4	3.5041	32	32;48;53;85;87;93;98;101;122;127;129;136;139;157;179;137;142;165;184;184	0	6.851
A0A087WTA8;P08123	A0A087WTA8;P08123	5;5	5;5	5;5	Collagen alpha-2(I) chain	COL1A2	>tr|A0A087WTA8|A0A087WTA8_HUMAN Collagen alpha-2(I) chain OS=Homo sapiens GN=COL1A2 PE=4 SV=1;>sp|P08123|CO1A2_HUMAN Collagen alpha-2(I) chain OS=Homo sapiens GN=COL1A2 PE=1 SV=7	2	5	5	5	2	2	1	2	1	0	0	0	0	0	2	2	1	2	1	0	0	0	0	0	2	2	1	2	1	0	0	0	0	0	4.2	4.2	4.2	129.15	1364	1364;1366	0	32.995
A0A087WTP3;Q92945;M0R0I5;M0QXW7;M0QYH3;M0R3J3	A0A087WTP3;Q92945;M0R0I5	9;9;6;3;3;1	9;9;6;3;3;1	8;8;5;3;3;1	Far upstream element-binding protein 2	KHSRP	>tr|A0A087WTP3|A0A087WTP3_HUMAN Far upstream element-binding protein 2 OS=Homo sapiens GN=KHSRP PE=1 SV=1;>sp|Q92945|FUBP2_HUMAN Far upstream element-binding protein 2 OS=Homo sapiens GN=KHSRP PE=1 SV=4;>tr|M0R0I5|M0R0I5_HUMAN Far upstream element-binding	6	9	9	8	2	3	2	6	3	0	2	5	1	4	2	3	2	6	3	0	2	5	1	4	1	2	1	5	2	0	2	5	1	4	13.5	13.5	12.4	73.027	711	711;711;279;116;169;269	0	67.7
A0A087WTT1;E7EQV3;P11940-2;P11940;E5RGH3;E5RH24;E5RJB9;E7ERJ7;H0YAP2;H0YAR2;Q4VXU2-2;Q96DU9-2;Q96DU9;Q4VXU2;Q9H361	A0A087WTT1;E7EQV3;P11940-2;P11940;E5RGH3;E5RH24;E5RJB9;E7ERJ7	3;3;3;3;2;2;2;2;1;1;1;1;1;1;1	3;3;3;3;2;2;2;2;1;1;1;1;1;1;1	2;2;2;2;1;1;1;1;1;1;1;1;1;1;1	Polyadenylate-binding protein 1	PABPC1	>tr|A0A087WTT1|A0A087WTT1_HUMAN Polyadenylate-binding protein 1 OS=Homo sapiens GN=PABPC1 PE=1 SV=1;>tr|E7EQV3|E7EQV3_HUMAN Polyadenylate-binding protein 1 OS=Homo sapiens GN=PABPC1 PE=1 SV=1;>sp|P11940-2|PABP1_HUMAN Isoform 2 of Polyadenylate-binding prot	15	3	3	2	0	0	0	2	0	0	0	1	0	0	0	0	0	2	0	0	0	1	0	0	0	0	0	2	0	0	0	0	0	0	5.7	5.7	3.6	58.535	522	522;591;547;636;108;118;129;604;131;284;330;350;382;614;631	0	19.31
E9PL01;A0A087WUC6;E9PI68;Q15005;E9PRB9	E9PL01;A0A087WUC6;E9PI68;Q15005;E9PRB9	2;2;2;2;1	2;2;2;2;1	2;2;2;2;1	Signal peptidase complex subunit 2	SPCS2	>tr|E9PL01|E9PL01_HUMAN Signal peptidase complex subunit 2 OS=Homo sapiens GN=SPCS2 PE=1 SV=1;>tr|A0A087WUC6|A0A087WUC6_HUMAN Signal peptidase complex subunit 2 OS=Homo sapiens GN=SPCS2 PE=1 SV=1;>tr|E9PI68|E9PI68_HUMAN Signal peptidase complex subunit 2 O	5	2	2	2	1	1	1	2	0	0	0	1	0	0	1	1	1	2	0	0	0	1	0	0	1	1	1	2	0	0	0	1	0	0	11.5	11.5	11.5	17.027	157	157;227;257;226;87	0	14.623
A0A087WUF6;P09038-2;P09038-3;P09038-1;P09038	A0A087WUF6;P09038-2;P09038-3;P09038-1;P09038	2;2;2;2;2	2;2;2;2;2	2;2;2;2;2	Fibroblast growth factor 2	FGF2	>tr|A0A087WUF6|A0A087WUF6_HUMAN Fibroblast growth factor 2 OS=Homo sapiens GN=FGF2 PE=4 SV=1;>sp|P09038-2|FGF2_HUMAN Isoform 3 of Fibroblast growth factor 2 OS=Homo sapiens GN=FGF2;>sp|P09038-3|FGF2_HUMAN Isoform 4 of Fibroblast growth factor 2 OS=Homo sap	5	2	2	2	0	0	1	1	0	0	1	0	0	0	0	0	1	1	0	0	1	0	0	0	0	0	1	1	0	0	1	0	0	0	6.2	6.2	6.2	30.752	288	288;155;196;210;288	0	12.286
E7ETK0;A0A087WUS0;P62847-2;P62847-3;P62847;P62847-4	E7ETK0;A0A087WUS0;P62847-2;P62847-3;P62847;P62847-4	2;2;2;2;2;2	2;2;2;2;2;2	2;2;2;2;2;2	40S ribosomal protein S24	RPS24	>tr|E7ETK0|E7ETK0_HUMAN 40S ribosomal protein S24 OS=Homo sapiens GN=RPS24 PE=1 SV=1;>tr|A0A087WUS0|A0A087WUS0_HUMAN 40S ribosomal protein S24 OS=Homo sapiens GN=RPS24 PE=1 SV=1;>sp|P62847-2|RS24_HUMAN Isoform 2 of 40S ribosomal protein S24 OS=Homo sapiens	6	2	2	2	0	1	0	1	0	1	2	1	1	1	0	1	0	1	0	1	2	1	1	1	0	1	0	1	0	1	2	1	1	1	17.6	17.6	17.6	15.197	131	131;132;130;132;133;289	0	13.696
A0A087WUX6;A0A087WX59;Q16186	A0A087WUX6;A0A087WX59;Q16186	1;1;1	1;1;1	1;1;1	Proteasomal ubiquitin receptor ADRM1	ADRM1	>tr|A0A087WUX6|A0A087WUX6_HUMAN Proteasomal ubiquitin receptor ADRM1 (Fragment) OS=Homo sapiens GN=ADRM1 PE=1 SV=1;>tr|A0A087WX59|A0A087WX59_HUMAN Proteasomal ubiquitin receptor ADRM1 OS=Homo sapiens GN=ADRM1 PE=1 SV=1;>sp|Q16186|ADRM1_HUMAN Proteasomal ub	3	1	1	1	0	0	0	1	0	0	0	0	0	0	0	0	0	1	0	0	0	0	0	0	0	0	0	1	0	0	0	0	0	0	10.6	10.6	10.6	14.946	141	141;368;407	0.0017668	6.428
F8W7C6;A0A087WV22;X1WI28;P27635;H7C123;H7C2C5;Q96L21;B8A6G2;A6QRI9;H7C2U2	F8W7C6;A0A087WV22;X1WI28;P27635;H7C123;H7C2C5;Q96L21	7;7;7;7;6;6;4;2;2;1	7;7;7;7;6;6;4;2;2;1	7;7;7;7;6;6;4;2;2;1	60S ribosomal protein L10;60S ribosomal protein L10-like	RPL10;RPL10L	>tr|F8W7C6|F8W7C6_HUMAN 60S ribosomal protein L10 OS=Homo sapiens GN=RPL10 PE=1 SV=2;>tr|A0A087WV22|A0A087WV22_HUMAN 60S ribosomal protein L10 OS=Homo sapiens GN=RPL10 PE=1 SV=1;>tr|X1WI28|X1WI28_HUMAN 60S ribosomal protein L10 (Fragment) OS=Homo sapiens G	10	7	7	7	0	2	1	4	1	0	3	0	0	0	0	2	1	4	1	0	3	0	0	0	0	2	1	4	1	0	3	0	0	0	38.7	38.7	38.7	18.565	163	163;178;201;214;91;131;214;108;181;28	0	47.161
A0A087WVQ6;Q00610-2;Q00610;J3KS13;A0A087WX41;P53675-2;P53675;K7EJJ5;J3QL20;J3KSQ2;J3KRF5	A0A087WVQ6;Q00610-2;Q00610	17;17;17;5;3;3;3;2;1;1;1	17;17;17;5;3;3;3;2;1;1;1	17;17;17;5;3;3;3;2;1;1;1	Clathrin heavy chain 1	CLTC	>tr|A0A087WVQ6|A0A087WVQ6_HUMAN Clathrin heavy chain 1 OS=Homo sapiens GN=CLTC PE=1 SV=1;>sp|Q00610-2|CLH1_HUMAN Isoform 2 of Clathrin heavy chain 1 OS=Homo sapiens GN=CLTC;>sp|Q00610|CLH1_HUMAN Clathrin heavy chain 1 OS=Homo sapiens GN=CLTC PE=1 SV=5	11	17	17	17	0	5	0	16	0	0	4	1	1	3	0	5	0	16	0	0	4	1	1	3	0	5	0	16	0	0	4	1	1	3	12.6	12.6	12.6	192.06	1679	1679;1639;1675;612;1260;1583;1640;222;97;122;131	0	172.98
A0A087WZC4;A0A087WVW4;O43548-2;O43548	A0A087WZC4;A0A087WVW4;O43548-2;O43548	1;1;1;1	1;1;1;1	1;1;1;1	Protein-glutamine gamma-glutamyltransferase 5	TGM5	>tr|A0A087WZC4|A0A087WZC4_HUMAN Protein-glutamine gamma-glutamyltransferase 5 OS=Homo sapiens GN=TGM5 PE=4 SV=1;>tr|A0A087WVW4|A0A087WVW4_HUMAN Protein-glutamine gamma-glutamyltransferase 5 OS=Homo sapiens GN=TGM5 PE=4 SV=1;>sp|O43548-2|TGM5_HUMAN Isoform	4	1	1	1	0	0	0	0	1	0	0	0	0	0	0	0	0	0	1	0	0	0	0	0	0	0	0	0	1	0	0	0	0	0	2.4	2.4	2.4	71.787	637	637;719;638;720	0	17.855
A0A087WW46;J3KN36;A0A087X117;Q5JPE7-3;Q5JPE7-2;Q15155;P69849;Q5JPE7;H3BUC9;A0A087WTD5	A0A087WW46;J3KN36;A0A087X117;Q5JPE7-3;Q5JPE7-2;Q15155;P69849;Q5JPE7;H3BUC9;A0A087WTD5	2;2;2;2;2;2;2;2;1;1	2;2;2;2;2;2;2;2;1;1	2;2;2;2;2;2;2;2;1;1	Nodal modulator 2;Nodal modulator 1;Nodal modulator 3	NOMO3;NOMO2;NOMO1	>tr|A0A087WW46|A0A087WW46_HUMAN Nodal modulator 1 OS=Homo sapiens GN=NOMO1 PE=4 SV=1;>tr|J3KN36|J3KN36_HUMAN Nodal modulator 3 OS=Homo sapiens GN=NOMO3 PE=4 SV=1;>tr|A0A087X117|A0A087X117_HUMAN Nodal modulator 1 OS=Homo sapiens GN=NOMO1 PE=4 SV=1;>sp|Q5JPE	10	2	2	2	0	0	0	2	0	0	0	0	0	0	0	0	0	2	0	0	0	0	0	0	0	0	0	2	0	0	0	0	0	0	2.2	2.2	2.2	122.11	1100	1100;1267;1267;1100;1222;1222;1222;1267;144;282	0	12.724
H0Y8D1;A6XMV8;CON__P07477;A0A096LNX4;A0A087WW55;A0A096LPH0;E7EQ64;A6XMV9;A0A096LP77;Q8NHM4;P07478;P07477	H0Y8D1;A6XMV8;CON__P07477;A0A096LNX4;A0A087WW55;A0A096LPH0;E7EQ64;A6XMV9;A0A096LP77;Q8NHM4;P07478;P07477	1;1;1;1;1;1;1;1;1;1;1;1	1;1;1;1;1;1;1;1;1;1;1;1	1;1;1;1;1;1;1;1;1;1;1;1	Putative trypsin-6;Trypsin-2;Trypsin-1;Alpha-trypsin chain 1;Alpha-trypsin chain 2	PRSS1;PRSS3P2;PRSS2	>tr|H0Y8D1|H0Y8D1_HUMAN Trypsin-1 (Fragment) OS=Homo sapiens GN=PRSS1 PE=3 SV=1;>tr|A6XMV8|A6XMV8_HUMAN Protease serine 2 preproprotein OS=Homo sapiens GN=PRSS3P2 PE=2 SV=1;>P07477 SWISS-PROT:P07477 Tax_Id=9606 Gene_Symbol=PRSS1 Trypsin-1 precursor;>tr|A0A	12	1	1	1	1	0	0	0	0	0	0	0	0	0	1	0	0	0	0	0	0	0	0	0	1	0	0	0	0	0	0	0	0	0	14.1	14.1	14.1	15.421	142	142;246;247;247;247;249;261;261;261;247;247;247	0	10.676
J3KTF1;E9PJ21;A0A087WWI4;K7EQK2;A0A087X054;Q9Y4L1-2;Q9Y4L1	J3KTF1;E9PJ21;A0A087WWI4;K7EQK2;A0A087X054;Q9Y4L1-2;Q9Y4L1	1;1;1;1;1;1;1	1;1;1;1;1;1;1	1;1;1;1;1;1;1	Hypoxia up-regulated protein 1	HYOU1	>tr|J3KTF1|J3KTF1_HUMAN Hypoxia up-regulated protein 1 (Fragment) OS=Homo sapiens GN=HYOU1 PE=1 SV=1;>tr|E9PJ21|E9PJ21_HUMAN Hypoxia up-regulated protein 1 (Fragment) OS=Homo sapiens GN=HYOU1 PE=1 SV=1;>tr|A0A087WWI4|A0A087WWI4_HUMAN Hypoxia up-regulated p	7	1	1	1	0	0	0	1	0	0	0	0	0	0	0	0	0	1	0	0	0	0	0	0	0	0	0	1	0	0	0	0	0	0	8.5	8.5	8.5	25.236	224	224;656;677;678;937;559;999	0.0017301	6.3492
A0A087WYV3;E7EPF0;A0A087WXF8;Q9NP64-2;Q9NP64-3;Q9NP64;A0A087WXU5	A0A087WYV3;E7EPF0;A0A087WXF8;Q9NP64-2;Q9NP64-3;Q9NP64;A0A087WXU5	7;7;7;7;7;7;4	7;7;7;7;7;7;4	7;7;7;7;7;7;4	Nucleolar protein of 40 kDa	ZCCHC17	>tr|A0A087WYV3|A0A087WYV3_HUMAN Nucleolar protein of 40 kDa OS=Homo sapiens GN=ZCCHC17 PE=1 SV=1;>tr|E7EPF0|E7EPF0_HUMAN Nucleolar protein of 40 kDa OS=Homo sapiens GN=ZCCHC17 PE=1 SV=2;>tr|A0A087WXF8|A0A087WXF8_HUMAN Nucleolar protein of 40 kDa OS=Homo sa	7	7	7	7	1	2	1	4	0	0	6	0	1	1	1	2	1	4	0	0	6	0	1	1	1	2	1	4	0	0	6	0	1	1	40.8	40.8	40.8	20.451	179	179;212;263;217;233;241;146	0	66
A0A087WXM6;J3QQT2;J3KRX5;P18621;P18621-3;J3KRB3;A0A087WWH0;J3QS96;J3QLC8;P18621-2;J3KSJ0;A0A087WY81	A0A087WXM6;J3QQT2;J3KRX5;P18621;P18621-3;J3KRB3;A0A087WWH0;J3QS96;J3QLC8;P18621-2	4;4;4;4;4;3;3;3;3;3;1;1	4;4;4;4;4;3;3;3;3;3;1;1	4;4;4;4;4;3;3;3;3;3;1;1	60S ribosomal protein L17	RPL17	>tr|A0A087WXM6|A0A087WXM6_HUMAN 60S ribosomal protein L17 (Fragment) OS=Homo sapiens GN=RPL17 PE=1 SV=1;>tr|J3QQT2|J3QQT2_HUMAN 60S ribosomal protein L17 (Fragment) OS=Homo sapiens GN=RPL17 PE=1 SV=1;>tr|J3KRX5|J3KRX5_HUMAN 60S ribosomal protein L17 (Fragm	12	4	4	4	1	1	2	4	0	0	1	1	0	0	1	1	2	4	0	0	1	1	0	0	1	1	2	4	0	0	1	1	0	0	29	29	29	19.586	169	169;171;174;184;228;129;132;138;174;146;56;98	0	30.253
H0YFY6;A0A087WY61;Q14980-5;Q14980-2;Q14980	H0YFY6;A0A087WY61;Q14980-5;Q14980-2;Q14980	1;1;1;1;1	1;1;1;1;1	1;1;1;1;1	Nuclear mitotic apparatus protein 1	NUMA1	>tr|H0YFY6|H0YFY6_HUMAN Nuclear mitotic apparatus protein 1 (Fragment) OS=Homo sapiens GN=NUMA1 PE=1 SV=1;>tr|A0A087WY61|A0A087WY61_HUMAN Nuclear mitotic apparatus protein 1 OS=Homo sapiens GN=NUMA1 PE=1 SV=1;>sp|Q14980-5|NUMA1_HUMAN Isoform 5 of Nuclear m	5	1	1	1	1	1	0	1	0	0	0	1	1	0	1	1	0	1	0	0	0	1	1	0	1	1	0	1	0	0	0	1	1	0	2	2	2	107.3	964	964;2099;979;2101;2115	0.0049669	6.1939
A0A087WY71;Q96CW1-2;Q96CW1;C9JJD3;C9JGT8;C9JJ47;E9PFW3;C9JPV8;C9JTK4	A0A087WY71;Q96CW1-2;Q96CW1;C9JJD3;C9JGT8;C9JJ47;E9PFW3;C9JPV8;C9JTK4	4;4;4;3;3;3;3;2;2	4;4;4;3;3;3;3;2;2	4;4;4;3;3;3;3;2;2	AP-2 complex subunit mu	AP2M1	>tr|A0A087WY71|A0A087WY71_HUMAN AP-2 complex subunit mu OS=Homo sapiens GN=AP2M1 PE=1 SV=1;>sp|Q96CW1-2|AP2M1_HUMAN Isoform 2 of AP-2 complex subunit mu OS=Homo sapiens GN=AP2M1;>sp|Q96CW1|AP2M1_HUMAN AP-2 complex subunit mu OS=Homo sapiens GN=AP2M1 PE=1 S	9	4	4	4	2	4	0	4	0	0	0	0	0	0	2	4	0	4	0	0	0	0	0	0	2	4	0	4	0	0	0	0	0	0	6.9	6.9	6.9	49.526	434	434;433;435;113;195;252;460;136;160	0	22.986
A0A087WYJ1;P15104	A0A087WYJ1;P15104	1;1	1;1	1;1	Glutamine synthetase	GLUL	>tr|A0A087WYJ1|A0A087WYJ1_HUMAN Glutamine synthetase OS=Homo sapiens GN=GLUL PE=1 SV=1;>sp|P15104|GLNA_HUMAN Glutamine synthetase OS=Homo sapiens GN=GLUL PE=1 SV=4	2	1	1	1	1	1	0	1	0	0	0	0	0	0	1	1	0	1	0	0	0	0	0	0	1	1	0	1	0	0	0	0	0	0	4.3	4.3	4.3	26.413	233	233;373	0.0034014	6.2873
A0A087WYL1;E7ESU7;D6RAX2;E7EPF8;Q5SQP8;Q13363-2;Q13363;P56545;P56545-2	A0A087WYL1;E7ESU7;D6RAX2;E7EPF8;Q5SQP8;Q13363-2;Q13363;P56545;P56545-2	1;1;1;1;1;1;1;1;1	1;1;1;1;1;1;1;1;1	1;1;1;1;1;1;1;1;1	C-terminal-binding protein 1;C-terminal-binding protein 2	CTBP1;CTBP2	>tr|A0A087WYL1|A0A087WYL1_HUMAN C-terminal-binding protein 2 (Fragment) OS=Homo sapiens GN=CTBP2 PE=1 SV=1;>tr|E7ESU7|E7ESU7_HUMAN C-terminal-binding protein 1 (Fragment) OS=Homo sapiens GN=CTBP1 PE=1 SV=1;>tr|D6RAX2|D6RAX2_HUMAN C-terminal-binding protein	9	1	1	1	0	1	0	1	0	0	0	0	0	0	0	1	0	1	0	0	0	0	0	0	0	1	0	1	0	0	0	0	0	0	6.8	6.8	6.8	12.604	117	117;171;187;202;513;429;440;445;985	0.0017212	6.3353
A0A087WYY6;Q13835-2;Q13835	A0A087WYY6;Q13835-2;Q13835	2;2;2	2;2;2	2;2;2	Plakophilin-1	PKP1	>tr|A0A087WYY6|A0A087WYY6_HUMAN Plakophilin-1 OS=Homo sapiens GN=PKP1 PE=4 SV=1;>sp|Q13835-2|PKP1_HUMAN Isoform 1 of Plakophilin-1 OS=Homo sapiens GN=PKP1;>sp|Q13835|PKP1_HUMAN Plakophilin-1 OS=Homo sapiens GN=PKP1 PE=1 SV=2	3	2	2	2	0	0	0	0	2	0	0	0	0	0	0	0	0	0	2	0	0	0	0	0	0	0	0	0	2	0	0	0	0	0	3	3	3	80.532	725	725;726;747	0	12.581
K7EKR9;A0A087WZ13;E9PAU2;Q8IY67-3;Q8IY67;Q8IY67-2	K7EKR9;A0A087WZ13;E9PAU2;Q8IY67-3;Q8IY67;Q8IY67-2	1;1;1;1;1;1	1;1;1;1;1;1	1;1;1;1;1;1	Ribonucleoprotein PTB-binding 1	RAVER1	>tr|K7EKR9|K7EKR9_HUMAN Ribonucleoprotein PTB-binding 1 (Fragment) OS=Homo sapiens GN=RAVER1 PE=1 SV=1;>tr|A0A087WZ13|A0A087WZ13_HUMAN Ribonucleoprotein PTB-binding 1 OS=Homo sapiens GN=RAVER1 PE=1 SV=1;>tr|E9PAU2|E9PAU2_HUMAN Ribonucleoprotein PTB-binding	6	1	1	1	0	0	0	1	0	0	0	0	0	0	0	0	0	1	0	0	0	0	0	0	0	0	0	1	0	0	0	0	0	0	13.5	13.5	13.5	10.831	96	96;739;756;75;606;739	0	7.4966
D6R9P3;D6RD18;Q99729-3;D6RBZ0;A0A087WZV1;Q99729-2	D6R9P3;D6RD18;Q99729-3;D6RBZ0;A0A087WZV1;Q99729-2	1;1;1;1;1;1	1;1;1;1;1;1	1;1;1;1;1;1		HNRNPAB	>tr|D6R9P3|D6R9P3_HUMAN Heterogeneous nuclear ribonucleoprotein A/B OS=Homo sapiens GN=HNRNPAB PE=1 SV=1;>tr|D6RD18|D6RD18_HUMAN Heterogeneous nuclear ribonucleoprotein A/B OS=Homo sapiens GN=HNRNPAB PE=1 SV=1;>sp|Q99729-3|ROAA_HUMAN Isoform 3 of Heterogen	6	1	1	1	0	1	0	1	0	0	0	0	0	0	0	1	0	1	0	0	0	0	0	0	0	1	0	1	0	0	0	0	0	0	5	5	5	30.302	280	280;283;285;327;330;332	0.0017182	6.3214
A0A087X0S5;P12109	A0A087X0S5;P12109	4;4	4;4	4;4	Collagen alpha-1(VI) chain	COL6A1	>tr|A0A087X0S5|A0A087X0S5_HUMAN Collagen alpha-1(VI) chain OS=Homo sapiens GN=COL6A1 PE=1 SV=1;>sp|P12109|CO6A1_HUMAN Collagen alpha-1(VI) chain OS=Homo sapiens GN=COL6A1 PE=1 SV=3	2	4	4	4	1	3	0	3	0	0	0	0	0	0	1	3	0	3	0	0	0	0	0	0	1	3	0	3	0	0	0	0	0	0	4.7	4.7	4.7	108.34	1026	1026;1028	0	26.75
A0A087X0X3;P52272-2;P52272;M0QZM1;M0R2I7;M0QY96;M0R019;M0R2T0;M0R0Y6;M0QYQ7;M0R0N3;M0QYL3	A0A087X0X3;P52272-2;P52272;M0QZM1;M0R2I7	22;22;22;16;13;4;4;4;2;2;2;1	22;22;22;16;13;4;4;4;2;2;2;1	22;22;22;16;13;4;4;4;2;2;2;1	Heterogeneous nuclear ribonucleoprotein M	HNRNPM	>tr|A0A087X0X3|A0A087X0X3_HUMAN Heterogeneous nuclear ribonucleoprotein M OS=Homo sapiens GN=HNRNPM PE=1 SV=1;>sp|P52272-2|HNRPM_HUMAN Isoform 2 of Heterogeneous nuclear ribonucleoprotein M OS=Homo sapiens GN=HNRNPM;>sp|P52272|HNRPM_HUMAN Heterogeneous nuc	12	22	22	22	3	8	11	9	10	0	8	14	7	12	3	8	11	9	10	0	8	14	7	12	3	8	11	9	10	0	8	14	7	12	31.1	31.1	31.1	77.569	730	730;691;730;383;214;116;353;357;99;219;276;99	0	173.12
A0A087X1B7;X6R700;Q9Y3Y2-4;Q9Y3Y2;Q9Y3Y2-3	A0A087X1B7;X6R700;Q9Y3Y2-4;Q9Y3Y2;Q9Y3Y2-3	1;1;1;1;1	1;1;1;1;1	1;1;1;1;1	Chromatin target of PRMT1 protein	CHTOP	>tr|A0A087X1B7|A0A087X1B7_HUMAN Chromatin target of PRMT1 protein OS=Homo sapiens GN=CHTOP PE=1 SV=1;>tr|X6R700|X6R700_HUMAN Chromatin target of PRMT1 protein OS=Homo sapiens GN=CHTOP PE=1 SV=1;>sp|Q9Y3Y2-4|CHTOP_HUMAN Isoform 3 of Chromatin target of PRMT	5	1	1	1	0	0	0	0	0	0	0	0	0	1	0	0	0	0	0	0	0	0	0	1	0	0	0	0	0	0	0	0	0	1	17.1	17.1	17.1	8.5199	76	76;223;202;248;249	1	-2
A0A087X1S2;P67809;H0Y449;Q9Y2T7;C9J5V9	A0A087X1S2;P67809;H0Y449	5;5;4;2;1	5;5;4;2;1	3;3;3;0;0	Nuclease-sensitive element-binding protein 1	YBX1	>tr|A0A087X1S2|A0A087X1S2_HUMAN Nuclease-sensitive element-binding protein 1 OS=Homo sapiens GN=YBX1 PE=1 SV=1;>sp|P67809|YBOX1_HUMAN Nuclease-sensitive element-binding protein 1 OS=Homo sapiens GN=YBX1 PE=1 SV=3;>tr|H0Y449|H0Y449_HUMAN Nuclease-sensitive	5	5	5	3	0	0	0	5	0	0	0	2	2	3	0	0	0	5	0	0	0	2	2	3	0	0	0	3	0	0	0	1	2	2	27.7	27.7	19.7	34.028	314	314;324;374;364;216	0	78.515
A0A087X296;P23219-4;P23219-3;P23219-2;P23219;P23219-6;P23219-5	A0A087X296;P23219-4;P23219-3;P23219-2;P23219;P23219-6;P23219-5	1;1;1;1;1;1;1	1;1;1;1;1;1;1	1;1;1;1;1;1;1	Prostaglandin G/H synthase 1	PTGS1	>tr|A0A087X296|A0A087X296_HUMAN Prostaglandin G/H synthase 1 OS=Homo sapiens GN=PTGS1 PE=4 SV=1;>sp|P23219-4|PGH1_HUMAN Isoform 4 of Prostaglandin G/H synthase 1 OS=Homo sapiens GN=PTGS1;>sp|P23219-3|PGH1_HUMAN Isoform 3 of Prostaglandin G/H synthase 1 OS=	7	1	1	1	0	0	0	1	0	0	0	0	0	0	0	0	0	1	0	0	0	0	0	0	0	0	0	1	0	0	0	0	0	0	3.4	3.4	3.4	63.286	551	551;490;537;562;599;630;630	0	7.6993
F1T0B3;A0A087X2G1;Q92499-3;Q92499;Q92499-2	F1T0B3;A0A087X2G1;Q92499-3;Q92499;Q92499-2	2;2;2;2;1	2;2;2;2;1	2;2;2;2;1	ATP-dependent RNA helicase DDX1	DDX1	>tr|F1T0B3|F1T0B3_HUMAN ATP-dependent RNA helicase DDX1 OS=Homo sapiens GN=DDX1 PE=1 SV=1;>tr|A0A087X2G1|A0A087X2G1_HUMAN ATP-dependent RNA helicase DDX1 OS=Homo sapiens GN=DDX1 PE=1 SV=1;>sp|Q92499-3|DDX1_HUMAN Isoform 3 of ATP-dependent RNA helicase DDX1	5	2	2	2	0	0	0	2	0	0	0	0	0	0	0	0	0	2	0	0	0	0	0	0	0	0	0	2	0	0	0	0	0	0	5.6	5.6	5.6	73.915	659	659;659;612;740;622	0	12.543
I3L3X7;A0A087X2I4;P28072	I3L3X7;A0A087X2I4;P28072	1;1;1	1;1;1	1;1;1	Proteasome subunit beta type-6	PSMB6	>tr|I3L3X7|I3L3X7_HUMAN Proteasome subunit beta type-6 (Fragment) OS=Homo sapiens GN=PSMB6 PE=1 SV=1;>tr|A0A087X2I4|A0A087X2I4_HUMAN Proteasome subunit beta type-6 OS=Homo sapiens GN=PSMB6 PE=1 SV=1;>sp|P28072|PSB6_HUMAN Proteasome subunit beta type-6 OS=H	3	1	1	1	0	1	0	1	0	0	0	0	0	0	0	1	0	1	0	0	0	0	0	0	0	1	0	1	0	0	0	0	0	0	9.8	9.8	9.8	10.686	102	102;213;239	0	7.9509
A2A274;Q99798	A2A274;Q99798	4;4	4;4	4;4	Aconitate hydratase, mitochondrial	ACO2	>tr|A2A274|A2A274_HUMAN Aconitate hydratase, mitochondrial OS=Homo sapiens GN=ACO2 PE=1 SV=1;>sp|Q99798|ACON_HUMAN Aconitate hydratase, mitochondrial OS=Homo sapiens GN=ACO2 PE=1 SV=2	2	4	4	4	0	2	0	4	0	0	0	0	0	0	0	2	0	4	0	0	0	0	0	0	0	2	0	4	0	0	0	0	0	0	4.7	4.7	4.7	87.819	805	805;780	0	23.379
F8WEB6;A2IDB1;Q04917	F8WEB6;A2IDB1;Q04917	1;1;1	1;1;1	1;1;1	14-3-3 protein eta	YWHAH	>tr|F8WEB6|F8WEB6_HUMAN 14-3-3 protein eta OS=Homo sapiens GN=YWHAH PE=1 SV=1;>tr|A2IDB1|A2IDB1_HUMAN 14-3-3 protein eta OS=Homo sapiens GN=YWHAH PE=1 SV=1;>sp|Q04917|1433F_HUMAN 14-3-3 protein eta OS=Homo sapiens GN=YWHAH PE=1 SV=4	3	1	1	1	0	0	0	1	0	0	0	0	0	0	0	0	0	1	0	0	0	0	0	0	0	0	0	1	0	0	0	0	0	0	23.1	23.1	23.1	4.5061	39	39;72;246	0	8.2909
[truncated: 663 more rows]
[truncated: 75 more columns]
