# Supplementary material for: The long non-coding RNA MIR31HG regulates the senescence associated secretory phenotype
Source: Nat Commun. 2021 Apr 28;12:2459. doi: 10.1038/s41467-021-22746-4 (PMC8080841; doi:10.1038/s41467-021-22746-4)
Supplement: Supplementary file 7 — Supplementary Data 3 [file 41467_2021_22746_MOESM7_ESM.xlsx]

## Sheet: Supplementary Table 3A
Gene	Con1	Con2	Con3	Sen1	Sen2	Sen3	Sen siMir31hg 1	Sen siMir31hg 2	Sen siMir31hg 3	Sen siYBX1 1	Sen siYBX1 2	Sen siYBX1 3
A1BG	9.99833	8.88672	7.95884	4.76306	5.91818	7.07732	10.9071	9.05365	10.3912	10.5249	9.44455	9.54519
A1BG-AS1	2.73927	1.31116	2.42225	1.46556	1.71818	1.8578	1.89688	2.37473	1.76872	2.3766	2.15875	1.90904
A1CF	0.136963	0	0	0.183195	0.190909	0.0884665	0	0	0	0	0.539688	0
A2M	5.6155	6.11873	4.84451	1.28236	0.381818	0.619265	0.94844	0.890523	0.44218	3.05563	4.04766	2.29085
A4GALT	4.51979	3.93347	3.8064	2.93112	4.39091	2.65399	7.1133	7.42102	5.30616	5.9415	8.36517	11.4542
A4GNT	0.547854	0.291368	0.692073	0	0.190909	0.707732	0	0.14842	0.22109	0.339514	0	0.954519
AAAS	20.6815	21.9983	19.7241	14.2892	15.4636	14.6854	17.0719	12.3189	15.9185	19.8616	21.3177	20.2358
AACS	34.5148	41.3743	29.0671	26.9296	27.4909	25.9207	19.443	23.302	24.9832	16.6362	17.5399	15.0814
AADAC	0	0	0	0.183195	0	0	0	0.296841	0.22109	0.509271	0.539688	0.381808
AADACP1	0.136963	0	0	0	0	0	0.47422	0.14842	0.22109	1.01854	0	1.14542
AADAT	6.84817	10.3436	6.92073	11.9077	11.4546	11.943	10.4328	13.2094	13.7076	13.4108	11.6033	14.3178
AAGAB	66.1534	69.0542	66.785	52.2105	47.1546	48.8335	52.6384	51.6503	46.8711	70.4492	77.1754	66.2436
AAK1	208.458	192.594	192.742	150.22	144.136	146.5	154.121	151.389	149.457	163.476	157.049	160.741
AAMDC	11.368	9.76083	12.4573	5.31265	5.72728	4.68872	3.31954	3.11683	4.4218	4.07417	3.23813	3.81808
AAMP	50.5395	50.4067	50.1753	73.2779	67.2	64.2266	66.865	63.524	69.8645	72.6561	84.4612	88.7703
AAR2	37.665	33.5073	33.9116	21.9834	25.3909	26.363	18.4946	24.4894	24.0988	27.1611	29.1432	28.6356
AARD	0.136963	0.145684	0.692073	0.366389	0	0.0884665	0	0.14842	0	0.169757	0.269844	0
AARS	72.7276	78.5237	62.2865	59.9047	53.8364	57.6801	35.5665	39.4799	34.9322	57.5477	58.826	59.7529
AARS2	10.8201	11.509	16.2637	5.86223	7.25455	8.75818	10.4328	6.67892	8.18034	11.7132	13.4922	12.2178
AARSD1	0.684817	0.145684	0	0.366389	0	0.176933	0	0.14842	0	0.339514	0	0
AASDH	21.6402	21.9983	20.7622	10.2589	12.2182	11.4122	7.1133	10.0926	11.9389	9.5064	11.0636	8.20886
AASDHPPT	129.157	129.513	136.684	108.818	111.109	111.733	84.8853	97.9575	91.9735	90.141	93.3661	93.352
AASS	40.8151	42.8311	40.8323	42.1348	38.5637	41.7562	36.0407	36.5114	38.4697	50.4179	52.6196	50.2077
AATBC	0.136963	0.145684	0	0	0.190909	0	0	0.296841	0	0.509271	0.269844	0.763615
AATK	0.684817	0.291368	0.346036	0	0	0.176933	0.47422	0	0.22109	0.509271	0.269844	1.52723
ABALON	0.136963	0	0	0.549584	0.572728	0.176933	0	0.445261	1.32654	0	0.539688	0.190904
ABAT	10.8201	11.9461	6.92073	2.38153	3.81818	3.27326	3.31954	2.37473	3.97962	2.20684	1.34922	1.33633
ABCA1	31.0907	29.2825	34.2576	150.769	163.991	151.985	286.903	296.841	276.363	90.6503	70.6992	74.4525
ABCA10	0.958744	1.16547	0.346036	0	0	0.176933	0.47422	0.742102	0	0.339514	0	0.190904
ABCA11P	7.25906	6.26441	6.22865	5.12945	4.77273	4.60026	4.7422	5.7884	4.20071	7.46931	10.7938	8.20886
ABCA12	1.09571	0.291368	0	0	0	0	0	0.296841	0	0	0.269844	0
ABCA13	0	0	0	3.2975	2.48182	4.68872	1.42266	0.742102	1.10545	4.41369	5.39688	4.58169
ABCA2	30.5429	32.6332	30.1052	33.1582	39.1364	32.7326	55.4837	37.8472	50.1875	40.572	36.6988	37.2262
ABCA3	0.958744	0.437052	1.38415	0.549584	0.190909	0.265399	0	0.445261	0.22109	0	0.269844	0.572711
ABCA4	0.41089	0.291368	0	3.84709	3.62727	4.86566	4.26798	3.85893	5.30616	8.82737	6.20642	8.39977
ABCA5	20.9554	20.1044	19.378	2.74792	5.34546	4.95412	4.26798	4.74946	3.53744	2.03709	1.88891	2.67265
ABCA6	2.19142	1.60252	4.15244	4.21348	7.25455	5.13105	10.9071	8.45997	9.94906	0	1.07938	0.572711
ABCA7	2.32838	2.768	3.46036	1.28236	1.33636	1.15006	0.94844	3.11683	1.32654	2.71611	2.15875	1.90904
ABCA8	9.72441	8.88672	8.65091	1.83195	1.71818	3.36173	1.42266	1.33578	2.2109	0.509271	1.61907	0.954519
ABCA9	0.684817	0.582736	1.03811	0.549584	0.763637	0.353866	0.94844	1.33578	0.884361	0.169757	0	0.190904
ABCB1	4.93068	4.66189	5.88262	0.915974	0.763637	0.707732	0.94844	0.296841	0	1.1883	1.88891	2.67265
ABCB10	41.9108	44.725	56.75	19.785	20.2364	23.1782	15.6493	20.3336	19.677	10.8645	12.6827	11.2633
ABCB6	13.8333	12.3831	11.7652	5.12945	6.3	8.13891	4.7422	5.34314	5.30616	4.24393	4.31751	5.1544
ABCB7	24.9274	22.8724	24.9146	14.4724	17.9455	18.1356	16.1235	16.0294	15.0341	20.8801	17.5399	17.3722
ABCB8	17.5313	18.2105	25.2607	15.5716	13.9364	16.8086	15.6493	16.1778	17.0239	21.2196	24.5558	21.5721
ABCB9	4.79372	6.99283	2.07622	4.76306	2.86364	3.18479	7.1133	3.26525	5.96943	5.43223	4.58735	5.1544
ABCC1	4.65676	5.24462	3.8064	4.03028	5.91818	4.42332	2.84532	5.0463	5.74834	4.58344	3.23813	4.19988
ABCC10	25.3382	27.0972	22.4924	28.7616	24.0546	22.382	28.9274	23.302	22.109	17.3152	18.3494	15.6541
ABCC2	1.5066	1.01979	0.346036	1.28236	0.763637	1.0616	1.42266	1.4842	1.32654	1.01854	0.809533	0.954519
ABCC3	46.0197	46.6189	36.3338	13.9228	17.1818	14.42	12.3297	14.0999	15.4763	38.0256	35.8893	36.8444
ABCC4	69.9883	65.9948	62.6326	57.8895	56.3182	56.1762	55.9579	50.6114	46.2078	21.3894	17.27	16.6086
ABCC5	42.3217	39.3347	45.3308	52.3937	56.7	56.6185	65.4423	70.6482	68.759	79.6161	65.842	75.7888
ABCC9	0.273927	0.72842	0.346036	0	0	0.176933	0	0	0	1.01854	1.61907	1.90904
ABCD1	6.98514	8.01262	10.0351	12.0909	10.5	10.1736	13.7524	12.7642	14.5919	14.4294	18.3494	12.0269
ABCD3	91.7655	89.3043	87.5472	56.0576	54.6	58.5648	69.7103	86.0839	77.3815	97.9499	97.6836	91.8247
ABCD4	17.2574	15.2968	13.8415	12.0909	16.2273	15.4816	13.2782	15.2873	18.5716	16.2967	19.4288	16.6086
ABCE1	184.49	174.966	188.59	166.89	169.527	175.783	115.235	113.839	100.154	121.546	124.938	117.597
ABCF2	79.3018	74.4445	69.5533	60.8206	61.2818	59.8918	55.9579	53.1345	50.8507	43.6276	39.9369	42.7625
ABCF3	26.7079	28.9911	26.6448	39.0205	32.4546	32.7326	36.9891	30.723	38.2486	36.8373	37.2385	38.5626
ABCG2	2.73927	2.91368	0.692073	1.28236	0.763637	0.973131	1.42266	1.92947	1.76872	0	0.269844	0.572711
ABCG4	0	0.291368	0	0	0	0	0	0	0	0.169757	0.539688	0
ABHD10	68.4817	70.8024	79.2423	84.2696	75.2182	83.8662	94.844	87.5681	86.4462	170.266	175.938	162.077
ABHD11	4.79372	5.39031	3.8064	3.11431	5.53637	6.10419	7.58752	6.38208	9.94906	5.43223	5.12704	7.06344
ABHD11-AS1	0.273927	0.291368	0.346036	0.183195	0.381818	0.619265	0.47422	0.296841	0.22109	0.339514	0	0
ABHD12	45.7458	51.2808	41.8704	21.9834	25.2	20.8781	26.5563	28.1999	30.0683	26.8216	27.794	29.5901
ABHD12B	0	0.145684	0	0.549584	0.190909	0	0	0.14842	0	0.169757	0	0.190904
ABHD13	61.3596	56.5254	53.9817	69.4308	61.0909	66.4383	67.3392	66.9376	62.5685	62.6404	58.826	51.9258
ABHD14A	2.87623	2.62231	1.38415	1.64875	1.14546	1.68086	1.89688	0.890523	1.32654	1.35806	1.61907	2.86356
ABHD14B	13.0115	15.4425	19.032	12.0909	12.2182	10.616	8.06174	10.5379	7.95925	18.164	14.0319	12.7906
ABHD15	11.6419	9.76083	10.0351	10.6253	9.92728	10.616	12.8039	14.6936	18.3505	16.1269	14.8414	16.7995
ABHD16B	2.32838	3.49642	2.42225	5.67904	6.49091	3.98099	5.69064	5.0463	7.51706	9.84591	11.8731	9.16338
ABHD17A	8.08084	9.46946	13.4954	10.2589	8.4	7.87351	10.9071	9.64733	11.4967	9.67616	10.5239	10.1179
ABHD17B	29.1732	35.2555	33.5655	76.3922	74.4546	73.4272	54.0611	63.524	59.2522	56.3594	46.1434	48.4896
ABHD17C	60.127	59.5848	64.7088	159.929	166.664	151.189	82.5142	83.2639	79.8135	62.9799	67.1912	58.9893
ABHD18	16.4356	16.1709	15.9177	13.19	10.3091	11.4122	12.8039	13.061	11.4967	8.48786	9.44455	9.16338
ABHD2	127.513	128.202	133.224	207.743	200.264	208.339	197.75	195.915	192.791	412.51	411.243	396.698
ABHD3	8.90263	10.7806	11.0732	7.69418	4.96364	7.16578	12.8039	9.05365	10.8334	10.0157	9.98424	6.29983
ABHD4	17.6683	19.9587	13.1494	23.9985	22.1455	23.0897	32.2469	30.1294	31.3948	35.649	33.1908	33.5991
ABHD5	53.1418	54.6315	64.0167	119.443	109.391	121.111	77.2978	92.7628	91.3102	138.692	136.001	137.069
ABHD6	7.53299	8.1583	4.15244	7.32779	10.1182	9.37744	14.7008	12.7642	15.2552	16.2967	16.1907	16.7995
ABHD8	6.71121	6.99283	5.19054	5.49584	5.72728	5.39645	8.53596	5.0463	3.97962	7.46931	8.36517	6.49073
ABI1	131.485	129.513	134.262	165.242	183.846	166.848	159.812	167.418	152.552	160.421	158.129	160.55
ABI2	145.181	161.564	152.948	124.023	128.1	133.142	117.606	125.861	125.579	161.439	152.192	167.614
ABI3	0.547854	1.31116	1.03811	0.366389	0.190909	0.619265	0	0	0.44218	0.339514	0.539688	0.381808
ABI3BP	4.79372	5.24462	3.46036	3.2975	2.29091	3.71559	1.42266	2.81999	3.09526	2.54636	2.69844	1.71813
ABL1	93.4091	96.0058	99.3124	150.586	164.182	151.632	149.379	131.204	131.328	138.861	142.208	153.105
ABL2	215.717	215.321	216.965	448.277	449.782	439.236	384.592	383.964	370.768	586.85	582.324	600.965
ABLIM1	40.1303	41.2286	36.6799	9.89251	8.59091	12.2968	11.3813	10.6863	7.95925	8.14834	9.71439	8.59067
ABLIM3	56.9768	59.2934	56.0579	79.5065	85.3364	88.2895	66.865	56.5482	69.6434	97.6104	86.3501	87.8158
ABRACL	40.8151	47.3473	41.1783	63.5686	56.8909	66.6152	82.5142	86.9744	79.1503	86.7459	87.9692	89.5339
ABRAXAS1	11.7789	13.84	13.1494	8.79335	11.6455	9.37744	12.3297	11.7252	13.4865	14.4294	11.3335	9.73609
ABRAXAS2	46.0197	45.0164	38.7561	39.9364	42.7637	41.0484	36.0407	42.4483	34.9322	42.609	42.6354	44.6715
ABT1	18.3531	17.1907	15.9177	19.785	17.9455	21.5858	14.2266	22.5599	16.3607	23.4265	29.9527	25.3902
ABTB1	6.84817	9.32378	4.84451	12.6404	13.1727	12.3853	16.5977	9.79575	15.2552	14.7689	12.6827	17.3722
ABTB2	9.17655	12.0918	12.4573	10.8085	12.2182	12.3853	20.8657	21.3726	17.4661	17.3152	21.5875	18.8995
ACAA1	20.6815	24.1835	19.032	13.9228	18.5182	16.3663	14.7008	19.2947	15.6974	24.1055	20.2383	23.0994
ACAA2	14.7921	14.8598	20.0701	8.06057	5.53637	7.34272	11.8555	8.60839	10.8334	9.33664	10.5239	10.6906
ACACA	0.547854	0.72842	1.38415	0	0.572728	0.265399	0	0.742102	0.66327	0	0.269844	0.190904
ACACB	1.5066	2.33094	2.76829	0.549584	0.954546	0.619265	1.89688	2.07789	1.10545	2.03709	0.539688	2.09994
ACAD10	11.7789	11.8004	8.30487	7.51098	7.82728	8.13891	7.58752	7.71787	7.73815	8.99713	11.0636	7.63615
ACAD8	13.4224	13.2572	10.7271	16.6707	15.2727	13.7123	14.2266	15.4357	18.1294	21.0499	24.8257	25.0084
ACAD9	24.7904	26.3688	25.9527	20.5178	17.9455	21.4089	25.6079	22.2631	22.3301	25.6333	26.7146	27.4901
ACADM	69.4405	69.9283	77.1661	64.1181	62.4273	64.2266	56.4322	63.2271	65.2216	56.0199	58.2863	61.2801
ACADS	1.78053	3.78778	2.76829	0.366389	1.33636	1.8578	1.42266	0.14842	1.32654	0.848786	0.269844	0.954519
ACADSB	47.3894	41.0829	44.2926	27.6624	32.2637	33.2634	34.1438	33.0978	32.7213	32.4236	30.2226	25.9629
ACADVL	143.127	145.101	128.379	110.283	117.218	121.641	128.039	123.931	135.97	123.413	128.446	132.487
ACAN	0	0	0	0	0	0	0	0	0	0.169757	0.539688	0.572711
ACAP1	1.09571	0.582736	2.76829	0.915974	0.572728	0.442332	2.3711	0.593682	1.10545	0.848786	2.15875	2.29085
ACAP2	262.422	260.629	276.483	273.327	271.855	292.028	257.027	297.286	285.648	269.065	266.066	253.902
ACAP3	29.995	31.0307	28.375	20.3346	18.7091	19.8165	33.1954	23.302	30.0683	35.649	37.2385	39.8989
ACAT1	83.6847	90.1784	91.6996	69.2476	68.1546	72.0117	59.2775	69.6092	64.1161	56.8686	53.699	54.2167
ACAT2	27.9405	27.8256	29.0671	13.3732	18.9	17.7818	14.7008	17.0684	14.813	21.3894	19.9685	18.1359
ACBD3	166	168.411	160.215	167.257	173.155	175.341	158.864	180.925	164.491	151.423	156.24	155.968
ACBD3-AS1	0.136963	0.291368	0.692073	0.366389	0.763637	0.442332	0.47422	0.445261	0.44218	0.169757	0.539688	0.381808
ACBD4	3.42409	4.5162	2.42225	1.64875	1.33636	1.23853	1.42266	0.742102	1.54763	1.35806	1.34922	1.14542
ACBD5	62.1814	59.1477	64.3628	53.1265	49.2546	54.053	54.0611	54.6187	53.0616	51.9457	54.5085	49.0623
ACBD6	24.2425	26.5145	23.1844	21.8002	24.8182	19.728	20.3914	20.9273	20.5614	18.5035	19.1589	20.8085
ACBD7	1.78053	2.47663	2.07622	0.183195	0.190909	0.353866	0.47422	0	0.22109	0	0.269844	0
ACCS	2.32838	2.18526	2.76829	1.28236	1.71818	1.68086	1.42266	0.742102	1.10545	2.88587	2.69844	1.71813
ACD	6.84817	5.68168	7.6128	5.31265	5.53637	4.51179	7.1133	5.63998	5.30616	5.77174	8.09533	8.39977
ACE	3.0132	3.78778	2.42225	2.19834	2.29091	1.5924	2.3711	1.03894	1.76872	7.97859	8.63501	5.72711
ACER2	2.73927	4.5162	3.46036	3.11431	2.86364	2.56553	3.31954	4.45261	5.08507	4.41369	1.34922	2.29085
ACER3	41.4999	42.9768	51.5594	41.9516	35.5091	42.8178	47.422	43.9325	44.4391	43.2881	40.7465	43.9079
ACIN1	139.977	141.605	140.145	152.968	157.691	151.366	173.564	157.029	171.787	182.319	190.24	194.913
ACKR3	0	0	0	0.732779	1.14546	0.619265	0	0	0	0	0.269844	0
ACKR4	78.754	89.45	92.0457	9.89251	9.73637	10.7929	3.31954	4.60104	4.4218	1.69757	2.96829	2.29085
ACLY	266.12	267.913	267.14	247.496	256.964	248.679	299.233	285.858	277.91	255.824	239.622	233.666
ACO1	213.252	204.977	186.86	250.244	260.591	253.014	291.171	277.546	284.101	190.128	169.192	177.541
ACO2	32.3234	33.3616	30.4512	26.9296	26.7273	27.9554	13.2782	16.3263	14.813	22.2382	16.4605	15.845
ACOD1	0	0	0	0.366389	0.190909	0.530799	0	0	0.22109	0.169757	0	0
ACOT1	0.684817	1.01979	1.03811	0.915974	0.381818	1.0616	1.42266	0.14842	0.66327	0.169757	0.269844	0.763615
ACOT11	1.36963	1.16547	0.692073	1.09917	1.90909	1.5924	2.3711	2.22631	1.10545	1.52781	1.88891	1.71813
ACOT12	0	0	0.346036	0	0.190909	0.353866	0	0.14842	0	0	0	0
ACOT13	17.5313	18.5019	17.9939	13.19	15.8455	14.9508	16.1235	18.5526	18.7927	17.6547	16.4605	13.1724
ACOT2	11.9158	10.6349	12.4573	7.51098	8.59091	7.16578	7.58752	6.97576	10.1701	5.26247	6.20642	7.06344
ACOT4	0	0.582736	0	0.183195	0	0.0884665	0	0	0	0	0.269844	0.190904
ACOT7	39.8564	36.421	42.2164	45.2491	44.8637	47.9488	58.329	53.5798	59.6943	84.0298	95.255	84.1886
ACOT8	6.43728	8.1583	8.65091	6.59501	6.10909	5.66185	5.21642	7.71787	7.29597	7.46931	8.63501	5.91802
ACOT9	67.386	65.7035	52.9436	58.0727	64.1455	64.1382	76.3494	61.7429	73.623	58.0569	58.2863	59.9438
ACOX1	74.919	82.1658	78.2042	95.8108	102.518	102.267	128.988	127.938	117.62	84.7088	77.7151	85.9067
ACOX2	4.65676	1.89389	5.88262	2.74792	4.00909	3.36173	5.21642	3.26525	5.30616	1.69757	1.88891	2.09994
ACOX3	20.4076	20.9785	19.032	14.2892	13.1727	12.8276	13.7524	10.8347	11.2756	8.99713	10.5239	10.1179
ACP1	93.4091	104.455	100.004	83.9032	89.7273	88.2895	85.3596	85.4902	87.9939	134.787	147.335	137.26
ACP2	20.6815	19.813	22.4924	12.6404	8.01819	9.02358	7.1133	9.35049	17.245	8.99713	11.3335	11.4542
ACP5	0.821781	0.72842	1.03811	1.09917	0.954546	0.619265	1.89688	1.33578	1.32654	0.509271	0.269844	0.763615
ACP6	4.51979	3.93347	3.8064	2.93112	1.71818	3.53866	1.42266	2.81999	4.64289	5.9415	5.12704	5.34531
ACP7	0.273927	0.145684	0.692073	36.2726	27.6818	28.5747	17.5461	19.7399	22.5512	88.783	83.112	85.5249
ACPP	11.5049	12.8202	13.8415	488.947	496.364	503.993	405.458	396.431	405.7	458.005	446.322	461.796
ACRV1	0	0.145684	0	0	0	0.176933	0.47422	0.296841	0.44218	0.169757	0	0.572711
ACSBG1	0.821781	0.72842	0.346036	0.366389	0.572728	0.265399	0	0.296841	0.66327	0.848786	0.269844	0.763615
ACSBG2	0.41089	0	0.346036	0	0	0	0	0	0	0.339514	0.809533	0.190904
ACSF2	4.1089	4.07915	3.11433	1.28236	1.33636	1.50393	0.94844	1.18736	0.884361	0.848786	0.539688	0.954519
ACSF3	6.71121	8.01262	8.30487	6.22862	6.87273	5.83879	6.63908	8.01471	7.51706	8.82737	9.98424	8.78158
ACSL1	43.1435	38.1692	35.9878	43.7835	41.6182	45.1179	44.5767	53.1345	42.4493	58.2267	47.2227	48.1078
ACSL3	192.297	188.369	203.469	290.364	279.109	293.886	242.326	267.454	264.645	373.975	400.449	374.935
ACSL4	492.384	496.2	542.239	683.499	706.364	715.694	529.703	538.321	522.657	410.982	403.147	398.607
ACSL5	1.09571	1.74821	1.03811	1.28236	1.33636	1.0616	0.94844	1.03894	1.76872	1.86733	1.07938	1.71813
ACSM3	0	0.145684	0.346036	0	0.190909	0	0	0	0	0.169757	0	0.190904
ACSM4	0.273927	0	0	0.549584	1.14546	0.530799	0.47422	0.890523	0.66327	1.52781	1.34922	1.52723
ACSS1	3.15016	2.18526	2.42225	1.09917	0.763637	0.442332	1.42266	0.445261	1.54763	1.01854	0.539688	0.954519
ACSS2	23.6947	28.2627	28.375	24.7313	19.0909	29.017	27.0305	31.3167	29.405	19.6918	17.27	18.1359
ACSS3	0.41089	0.874104	0.346036	0.366389	0.190909	0.0884665	0	0	0.44218	0.848786	1.61907	0.954519
ACTA1	0.136963	0.874104	1.03811	0.183195	0.190909	0.442332	0	0.14842	0.22109	0.339514	0.269844	0.381808
ACTA2	98.7507	103.727	87.5472	6.9614	8.78182	7.07732	8.53596	9.94417	9.94906	3.39514	4.31751	3.05446
ACTA2-AS1	0.41089	0.874104	0.346036	0	0.190909	0.0884665	0.47422	0	0.22109	0.169757	0	0
ACTB	4787.28	4831.17	4664.22	2499.87	2460.63	2318.18	1936.24	1720.49	1767.62	2085.47	1988.48	2022.63
ACTBL2	0	0.291368	0	0	0.190909	0.265399	0	0.14842	0	0.169757	0.539688	0.381808
ACTC1	1.09571	1.01979	1.73018	0.549584	0	0.0884665	0.47422	0	0.22109	0	0	0
ACTG1	4863.71	5024.79	4913.37	2754.7	2812.09	2752.9	2268.19	2244.12	2245.61	2546.02	2566.76	2570.14
ACTG1P17	0	0.145684	0	0.183195	0.190909	0.0884665	0.47422	0	0.22109	0.339514	0	0.190904
ACTG1P20	28.8993	29.7195	33.5655	15.2052	17.3727	17.1625	20.8657	14.842	16.5818	14.7689	18.6193	17.5632
ACTG1P4	1.78053	2.768	1.38415	1.83195	1.52727	1.23853	1.89688	0.593682	0.884361	1.01854	0.269844	1.14542
ACTG2	8.49174	10.1979	8.99694	1.28236	0.572728	1.23853	0.94844	0.296841	0.22109	0.339514	0.539688	1.14542
ACTL10	1.23267	0.582736	0	0.366389	0.763637	0.442332	1.42266	0	0.22109	0.339514	0	0.763615
ACTL6A	60.2639	55.797	55.3658	64.3013	67.2	62.2804	51.2157	54.6187	44.6602	53.9828	54.5085	51.3531
ACTN1	1061.33	1044.41	976.515	691.743	663.982	694.727	739.309	651.863	671.893	543.223	532.133	566.221
ACTN4	431.435	433.264	400.364	268.563	259.636	259.561	271.254	219.365	249.39	335.44	324.892	358.136
ACTR10	93.9569	95.5687	111.424	76.0258	67.9637	80.7699	77.2978	84.5997	73.623	72.3165	78.5247	70.6344
ACTR1A	112.31	118.587	113.846	111.382	104.427	109.079	122.349	118.885	123.81	104.231	101.731	118.551
ACTR1B	59.99	54.0488	64.7088	39.2037	40.0909	37.2444	24.1852	26.4188	31.3948	31.0656	27.5241	27.6811
ACTR2	978.878	988.029	1010.77	747.801	768.982	804.072	757.329	779.356	735.346	666.467	667.864	666.254
ACTR3	836.299	834.769	875.818	680.568	695.291	723.567	635.454	646.817	629.886	786.145	797.39	776.979
ACTR3-AS1	0.547854	0.437052	0	0.183195	0	0.353866	0	0.296841	0.44218	0.509271	0.539688	0.763615
ACTR3B	5.47854	4.5162	4.15244	3.66389	3.05455	2.91939	0.47422	1.03894	0.884361	1.1883	1.07938	1.90904
ACTR3C	0.41089	0.291368	0.692073	0	0.190909	0.530799	0.47422	0.296841	0	0	0	0.572711
ACTR5	5.06765	3.93347	2.42225	3.4807	3.62727	3.98099	3.31954	2.96841	3.09526	5.9415	2.69844	6.10892
ACTR6	46.4306	46.6189	52.9436	46.7147	40.8546	44.3217	41.7313	38.8862	43.5548	54.3223	49.1116	54.4076
ACTR8	46.1567	46.1818	42.9085	41.2188	43.3364	44.4102	40.3087	42.7451	42.4493	35.3095	41.2862	37.0353
ACTRT3	3.83498	2.03958	3.11433	1.28236	2.67273	3.36173	2.3711	2.37473	1.98981	1.69757	1.34922	1.52723
ACVR1	75.4669	81.4374	81.3185	89.5822	104.809	95.2784	119.029	119.182	112.093	148.877	149.224	152.914
ACVR1B	51.6352	47.2016	44.9847	73.0947	72.9273	71.4809	61.1743	59.0714	57.9256	63.1497	64.4928	77.1251
ACVR1C	2.19142	2.91368	3.11433	1.83195	2.48182	2.38859	2.84532	2.37473	1.54763	6.45077	6.20642	3.81808
ACVR2A	9.72441	10.1979	15.2256	17.4035	12.4091	15.2162	10.9071	13.061	14.1498	14.0898	15.651	13.5542
ACVR2B	6.71121	6.4101	5.53658	11.7245	9.92728	10.8814	10.9071	13.8031	13.2654	18.5035	18.6193	17.5632
ACVR2B-AS1	0	0.145684	0.346036	0.183195	0	0.0884665	0	0.14842	0.22109	0.339514	0	0.190904
ACVRL1	19.7227	18.5019	21.8003	125.672	125.046	122.172	79.6689	70.4997	80.0346	70.4492	65.5721	65.6709
ACY1	0	0.145684	0.692073	0.549584	0.572728	0	0	0.445261	0.44218	0.509271	0.539688	0.381808
ACYP1	10.9571	9.17809	8.30487	6.9614	9.54546	9.55438	14.2266	11.1315	11.9389	8.65761	12.6827	9.16338
ACYP2	16.9835	13.9857	19.032	9.52612	12.4091	11.6776	13.2782	12.0221	10.3912	17.9943	17.8097	16.9904
ADA	3.28712	4.66189	3.46036	2.93112	2.29091	2.38859	3.79376	2.22631	1.98981	1.69757	1.34922	1.90904
ADA2	4.1089	3.93347	2.07622	0.732779	0.763637	0.619265	0.47422	0.296841	0.22109	1.52781	2.15875	1.90904
ADAL	10.8201	10.1979	11.0732	5.12945	5.72728	6.98885	4.7422	6.38208	5.52725	7.1298	5.39688	7.06344
ADAM10	447.734	455.408	458.498	308.133	313.473	309.81	312.985	319.846	283.659	276.195	248.527	251.611
ADAM12	45.3349	37.7322	32.5274	16.3043	13.1727	11.766	11.3813	11.8736	11.9389	10.5249	12.6827	12.2178
ADAM15	35.1996	37.7322	39.7942	20.3346	23.6727	22.382	23.711	24.341	22.7723	13.9201	17.27	14.3178
ADAM17	73.4124	63.0812	58.8262	72.5451	62.4273	71.304	78.7205	80.8892	74.7285	82.502	80.1437	77.6979
ADAM19	132.581	128.348	111.77	371.152	363.682	358.112	663.433	662.401	673.662	354.283	329.48	359.854
ADAM1A	2.46534	3.6421	3.46036	2.93112	1.14546	2.21166	1.42266	0.742102	1.76872	2.71611	3.77782	1.71813
ADAM21	1.36963	1.01979	0	0.183195	0.190909	0.176933	0.47422	0.14842	0.44218	0.169757	0	0
ADAM22	0.136963	0.145684	1.03811	0.183195	0.190909	0.0884665	0.47422	0.890523	0	0.169757	0.269844	0.763615
ADAM23	0.821781	1.01979	0.692073	1.28236	1.52727	1.23853	2.84532	3.41367	1.98981	1.69757	1.34922	0.954519
ADAM28	0	0.72842	0	0.915974	0.954546	0.353866	0.47422	0.742102	1.10545	1.69757	0	1.52723
ADAM33	56.292	58.1279	54.3277	63.3854	59.5637	52.726	67.3392	58.6261	65.6638	79.1068	73.9373	78.8433
ADAM8	2.32838	1.89389	1.38415	2.93112	2.48182	2.47706	5.21642	4.15577	6.41161	2.54636	4.8572	3.05446
ADAM9	500.738	517.907	509.712	345.139	340.391	346.435	380.798	366.302	367.452	256.843	250.955	251.229
ADAMTS1	690.57	651.936	625.288	104.787	109.582	106.425	230.945	235.84	235.24	76.7302	79.3342	82.2795
ADAMTS10	0.684817	1.01979	0.346036	0.915974	0.381818	0.530799	0.47422	0.742102	0.884361	2.54636	3.77782	2.67265
ADAMTS12	68.7557	79.2521	75.4359	26.7464	32.8364	31.3171	26.5563	22.5599	26.3097	21.5592	22.9368	23.2903
ADAMTS13	0.958744	1.89389	1.73018	0.549584	0.954546	0.530799	0.47422	0.890523	1.10545	0.848786	0.539688	1.33633
ADAMTS14	4.79372	5.97304	5.53658	4.21348	4.39091	3.62712	0.47422	1.33578	0.884361	1.86733	1.88891	1.52723
ADAMTS15	6.16336	6.11873	6.92073	0.732779	0.381818	0.619265	0.47422	1.18736	0.22109	1.1883	0.809533	0.763615
ADAMTS16	0	0	0	0	0	0	0	0	0	0.509271	0.539688	0.190904
ADAMTS18	0	0	0	0	0	0.176933	0	0.14842	0	0.339514	1.61907	0
ADAMTS2	124.5	127.036	99.6585	23.2657	17.9455	22.1166	23.2368	24.9346	27.8574	19.5221	19.9685	21.9539
ADAMTS3	2.60231	2.62231	2.42225	2.74792	0.763637	2.74246	1.42266	3.41367	2.87417	2.20684	1.61907	1.90904
ADAMTS4	8.76566	11.072	9.68902	281.753	282.546	242.487	192.533	194.134	192.127	424.053	460.624	420.943
ADAMTS5	11.6419	9.32378	13.8415	7.87737	6.49091	8.49278	26.0821	25.8252	21.0036	1.35806	0.809533	1.52723
ADAMTS6	68.3448	69.9283	78.2042	100.208	105.382	100.321	75.8752	80.1471	75.8339	100.326	94.4455	97.9337
ADAMTS7	2.46534	1.74821	2.42225	1.09917	0.190909	0.442332	0.94844	0.593682	0.66327	0.339514	1.61907	0.381808
ADAMTS8	0	0	0	0.183195	0.381818	0.0884665	0	0.445261	0.66327	1.1883	1.34922	1.14542
ADAMTS9	0.136963	0	0.346036	0.549584	0.954546	2.03473	1.89688	4.30419	5.30616	2.88587	2.69844	2.67265
ADAMTSL1	109.023	114.653	103.811	33.891	38.7546	36.979	77.2978	78.366	90.2048	26.4821	28.8733	28.6356
ADAMTSL4	14.1072	15.7339	16.9558	15.9379	15.2727	16.8086	23.2368	19.4431	23.8777	5.9415	7.01595	7.63615
ADAMTSL4-AS1	0.547854	0.145684	0	0.915974	1.52727	1.50393	1.89688	1.4842	0.884361	4.58344	2.4286	2.48175
ADAMTSL5	19.4488	16.608	16.6097	10.0757	9.35455	8.13891	13.2782	10.8347	13.0443	7.97859	11.0636	8.78158
ADAP1	0.273927	0.291368	0	0	0.190909	0.265399	0	0	0.22109	0.169757	0	0.381808
ADAP2	0.41089	0.291368	0	0.183195	0	0.265399	0	0.14842	0.884361	0.339514	0	0
ADAR	287.075	291.222	323.544	276.258	290.755	285.393	300.655	279.773	271.057	282.136	277.13	270.32
ADARB1	18.2161	20.2501	20.7622	12.0909	10.3091	10.9698	8.06174	12.4673	11.4967	16.6362	15.1113	15.0814
ADAT1	40.4042	42.1027	29.4131	37.5549	30.3546	33.6173	29.8758	28.7936	33.6057	31.5748	29.9527	35.3172
ADAT2	13.0115	15.1511	17.9939	11.1749	8.78182	9.55438	2.84532	6.08524	8.62252	11.883	11.8731	10.3088
ADAT3	1.23267	1.74821	2.07622	2.74792	2.48182	2.03473	2.84532	2.22631	3.09526	3.39514	5.12704	4.19988
ADCK1	4.79372	4.95326	5.53658	2.56473	3.24546	2.03473	2.84532	2.81999	1.98981	3.05563	2.96829	2.48175
ADCK2	7.25906	5.39031	6.92073	4.94626	4.58182	4.33486	4.26798	3.41367	3.75853	3.22539	3.77782	5.53621
ADCK5	3.83498	4.66189	5.53658	3.66389	3.05455	3.27326	4.26798	1.92947	3.31635	2.88587	2.96829	2.09994
ADCY1	0.136963	0.437052	0.346036	0.183195	0.381818	0.0884665	0	0.14842	0.22109	1.69757	1.61907	0.763615
ADCY10	0.136963	0	0	0.183195	0.763637	0.265399	0	0	0	0.169757	0	0
ADCY10P1	2.87623	2.18526	2.07622	4.39667	3.05455	3.00786	3.31954	3.11683	3.53744	2.03709	1.88891	0.954519
ADCY3	35.0626	36.5667	35.6417	29.3112	31.8818	30.9633	29.4016	33.8399	33.1635	34.2909	36.429	35.5081
ADCY4	2.73927	2.33094	1.38415	3.84709	4.77273	4.51179	1.89688	2.52315	3.09526	1.35806	1.61907	0.954519
ADCY5	0.273927	0.145684	0.346036	0	0.381818	0	0.94844	0.296841	0.22109	0.509271	0	0.381808
ADCY6	74.6451	72.6963	83.3948	49.2794	48.6818	43.614	60.7001	51.3535	56.8202	42.0998	35.8893	50.7804
ADCY7	43.4174	38.4606	43.6006	44.6995	48.8727	48.6566	73.0298	69.6092	71.8543	49.2296	58.2863	50.9713
ADCY8	0	0	0	0.549584	1.33636	0.973131	0	0.14842	0.66327	0.848786	1.61907	1.14542
ADCY9	71.084	66.7233	66.439	34.6238	31.8818	30.6094	32.7212	28.6452	27.1941	34.1212	38.5877	34.9354
ADD1	264.066	270.389	256.413	219.467	209.046	209.312	201.543	207.64	208.93	194.711	198.605	197.395
ADD3	250.643	253.927	265.41	107.169	113.782	107.487	111.442	108.347	101.923	89.6318	87.4295	91.4429
ADGRA2	69.1666	73.8618	77.8582	14.106	13.9364	12.6507	15.175	10.0926	14.5919	7.80883	8.90486	8.20886
ADGRA3	88.7523	85.6622	88.5853	107.718	120.464	110.583	87.7307	100.184	94.8477	58.5662	48.0323	58.0348
ADGRB1	0.821781	0.582736	0.346036	2.56473	2.67273	1.8578	1.42266	1.18736	1.54763	1.1883	1.88891	1.52723
ADGRB2	8.76566	10.9263	10.0351	8.42696	9.35455	8.31585	11.8555	11.8736	11.9389	29.8773	30.2226	28.2538
ADGRE1	0.136963	0.145684	0.346036	0	0.381818	0.353866	0	0.296841	0	0	0.269844	0.190904
ADGRE2	2.73927	1.74821	2.76829	17.7699	15.4636	16.4548	24.1852	26.122	28.9628	21.8987	24.286	27.872
ADGRE5	80.2606	82.6028	84.0868	99.2915	94.1182	87.9357	103.38	100.926	104.797	114.077	110.096	120.078
ADGRF4	0	0	0	0.183195	0.381818	0.176933	0.47422	0.593682	0.44218	2.03709	3.23813	0.954519
ADGRF5	0	0	0	0.366389	0	0.176933	0.47422	0	0.66327	0	0	0.190904
ADGRG1	3.0132	1.60252	1.38415	21.0674	15.6546	13.8892	56.4322	58.9229	54.6093	48.8901	47.2227	45.626
ADGRG2	0.547854	0.72842	0.346036	0.549584	0.190909	0.619265	0	0.445261	0.44218	0.848786	0.539688	0
ADGRG6	20.6815	22.4353	20.7622	2.38153	1.71818	1.8578	1.42266	0.296841	1.32654	5.9415	5.66673	4.58169
ADGRL1	4.65676	3.05936	3.46036	2.74792	2.86364	1.68086	4.26798	4.74946	4.4218	5.77174	7.55564	4.7726
ADGRL2	31.7755	28.8454	34.2576	20.3346	23.4818	22.4705	50.2673	53.5798	57.0413	16.6362	14.5716	13.7451
ADGRL4	69.5774	65.5578	69.8993	142.709	143.182	149.42	304.449	349.233	300.462	182.149	196.716	165.895
ADH1A	0.41089	0.145684	0.346036	0	0	0.0884665	0	0.14842	0	0	0	0
ADH5	190.516	190.992	198.279	138.129	145.473	148.624	143.689	141.445	135.528	146.331	128.446	123.706
ADH6	0.958744	0.145684	0.346036	0.366389	0	0.0884665	0	0.445261	0	0	0	0
ADHFE1	2.73927	3.20505	2.76829	1.46556	0.572728	0.796198	1.42266	1.92947	1.98981	1.35806	0.539688	1.33633
ADI1	30.8168	29.4282	29.0671	29.128	26.7273	32.9095	39.3602	36.2146	38.9119	22.0684	28.6035	23.0994
ADIPOR1	100.531	106.495	109.694	134.648	128.482	118.014	137.524	137.437	122.705	144.633	146.525	150.241
ADIPOR2	94.6418	81.2917	83.0487	118.71	122.182	116.245	113.339	121.111	113.419	126.13	120.62	130.578
ADIRF	9.45048	11.6547	11.7652	19.6018	23.8636	19.9934	39.3602	37.2535	42.8915	17.6547	15.1113	17.945
ADK	110.256	108.826	106.925	147.289	156.927	161.805	149.379	149.311	149.678	345.116	381.83	354.89
ADM	139.429	162.729	166.79	60.0879	62.2364	60.9534	35.0923	31.6136	30.0683	45.3252	50.4609	51.1622
ADM2	1.09571	0.874104	1.73018	0	0.572728	0.796198	0.47422	0.296841	0.66327	1.69757	1.61907	1.71813
ADM5	0.684817	0.582736	0	0.366389	0.190909	0.176933	0.47422	0.445261	0.22109	0.509271	1.07938	0.381808
ADNP	139.977	135.923	145.335	140.144	128.482	143.404	128.988	139.07	131.328	144.633	137.621	141.269
ADNP-AS1	1.64356	2.18526	0.692073	1.64875	1.71818	1.5924	0.94844	1.4842	2.43199	1.86733	1.88891	0.763615
ADNP2	32.1864	30.0109	33.2195	31.1431	32.6455	30.2555	25.6079	25.3799	26.5308	47.532	48.0323	47.3441
ADO	51.6352	45.8905	39.7942	72.5451	63.5728	65.2882	62.1228	58.0324	55.9358	77.7488	79.604	78.2706
ADORA1	0.41089	0.582736	0	0.549584	0	0.176933	0.47422	0.890523	0.22109	0.848786	0.539688	1.14542
ADORA2A	0	0	0	0.183195	0.190909	0.265399	0	0	0.44218	0	0	0
ADORA2A-AS1	0.41089	0.582736	0	1.09917	1.14546	1.41546	0	1.18736	1.10545	0.509271	0.269844	1.14542
ADORA2B	4.79372	4.80757	3.8064	1.28236	0.763637	0.973131	0.47422	1.63263	2.43199	0.848786	0	0.381808
ADPGK	63.825	74.5902	66.0929	56.7904	56.7	58.2994	40.3087	50.6114	50.6296	42.9486	39.3973	45.8169
ADPGK-AS1	0.684817	0.291368	0.346036	0	0.190909	0.0884665	0	0.14842	0.22109	0.679029	0.269844	0
ADPRH	0.958744	2.768	2.42225	1.46556	0.954546	0.884665	0.47422	1.03894	0.44218	1.69757	1.61907	1.90904
ADPRHL1	0.273927	0.72842	0.692073	0.549584	1.14546	0.707732	1.89688	0.742102	1.76872	1.52781	1.07938	1.90904
ADPRHL2	17.8053	18.0648	17.3018	15.2052	16.6091	18.401	18.4946	15.7326	19.8981	17.8245	21.5875	16.2268
ADPRM	4.65676	5.82736	5.53658	5.67904	7.63637	6.10419	6.16486	5.93682	5.30616	6.96004	6.20642	8.20886
ADRA1D	13.9703	14.1313	13.8415	3.84709	3.43637	3.27326	1.42266	4.00735	4.4218	1.1883	3.23813	2.67265
ADRA2A	0	0.145684	0	0.366389	0	0.0884665	0.47422	0.445261	0.44218	0.169757	0.809533	0.190904
ADRB2	1.91749	2.47663	2.42225	0	0.190909	0.176933	0.47422	0.296841	0	0.169757	0	0.190904
ADRM1	54.2375	60.3132	68.8612	60.0879	58.8	55.1146	64.4939	62.9303	64.7794	64.338	72.8579	70.4435
ADSL	53.8266	58.8563	58.1341	39.0205	44.6727	44.4102	30.8243	35.1757	35.8166	39.5534	42.3655	39.708
ADSS	128.746	129.95	129.418	201.148	200.646	202.146	188.739	193.837	190.801	184.866	180.796	179.831
ADSSL1	1.5066	1.60252	0.692073	0.366389	0.381818	0.176933	0.94844	0.742102	0.44218	0.509271	0.269844	0.190904
ADTRP	0.547854	0.291368	0	4.39667	3.81818	3.89252	4.26798	6.23366	7.29597	3.22539	3.50797	2.67265
AEBP1	154.084	157.63	134.954	176.966	166.473	163.044	151.276	124.228	148.573	161.948	142.748	157.496
AEBP2	90.122	95.423	89.6234	71.0795	67.0091	71.4809	57.3806	56.5482	53.7249	66.7146	64.7626	60.7074
AEN	54.3745	64.2466	60.9024	41.402	38.9455	40.2522	43.154	37.2535	38.2486	43.6276	58.0165	48.1078
AES	151.071	155.299	144.989	126.954	133.255	122.084	156.967	128.087	140.392	88.6132	84.4612	91.0611
AFAP1	337.341	314.823	334.617	191.805	205.036	197.723	135.627	122.447	129.117	117.981	117.112	120.46
AFAP1-AS1	1.5066	1.60252	2.76829	1.28236	0.954546	1.23853	0.47422	0.593682	0.66327	1.01854	0.809533	0.954519
AFAP1L1	2.87623	2.91368	2.07622	1.46556	2.48182	2.21166	1.89688	3.56209	2.43199	5.77174	6.20642	5.1544
AFDN	54.9224	53.9031	54.3277	60.4543	65.1	64.492	58.8032	55.2124	55.2725	44.9856	45.064	42.3806
AFDN-DT	0	0.291368	0.346036	0	0	0	0	0	0	0.509271	0	0.190904
AFF1	89.4371	81.146	89.2774	140.327	124.855	119.076	135.153	136.547	152.552	165.853	144.097	155.587
AFF1-AS1	2.05445	2.768	2.76829	1.28236	1.71818	1.76933	0	1.33578	2.2109	0.509271	0.539688	1.90904
AFF3	20.1336	19.6673	19.378	6.04543	5.15455	5.83879	4.26798	6.23366	7.07488	8.14834	10.2541	9.16338
AFF4	615.24	594.828	587.57	806.973	852.219	852.02	762.071	793.159	770.278	893.941	859.454	849.14
AFG1L	6.30032	7.57557	8.99694	3.11431	3.43637	3.53866	2.84532	4.15577	3.31635	2.03709	2.96829	2.67265
AFG3L1P	8.08084	7.72125	7.26676	4.03028	6.68182	5.75032	5.21642	6.23366	6.19052	7.80883	7.28579	5.34531
AFG3L2	39.7194	37.8778	46.0228	36.4557	32.8364	40.0753	34.618	35.0272	41.1228	37.1768	35.6194	42.5716
AFMID	11.231	11.9461	8.30487	10.0757	8.97273	9.11205	7.58752	10.3894	10.1701	10.5249	8.90486	11.4542
AFP	0.273927	0.437052	0.346036	0	0	0	0	0.14842	0.22109	0	0.269844	0
AFTPH	55.6072	52.4462	47.407	61.0038	62.0455	55.1146	64.4939	64.8598	63.4529	83.5205	78.5247	81.5159
AGA	54.2375	61.0416	51.9054	69.9804	64.9091	72.1002	71.6072	74.8039	76.055	55.3408	51.2704	52.8804
AGAP1	15.3399	13.84	15.5716	33.7078	34.9364	32.7326	38.886	39.3314	39.7962	54.492	52.8895	51.544
AGAP1-IT1	0.136963	0	0	0.366389	0.381818	0.176933	0.47422	0.593682	0.44218	0	0.269844	0.381808
AGAP11	1.78053	1.74821	1.03811	0.549584	0.381818	0.796198	0.94844	1.78105	2.65308	0.848786	0.539688	0.954519
AGAP2	0.684817	0	0.346036	0.183195	0.190909	0.353866	0	0.296841	0.22109	2.20684	3.50797	1.71813
AGAP2-AS1	1.64356	2.47663	2.07622	2.74792	2.29091	3.09633	2.84532	2.96841	2.65308	2.3766	2.69844	2.09994
AGAP3	30.8168	34.0901	37.0259	38.8373	36.8455	35.8289	45.5251	35.3241	35.8166	48.0413	49.6513	51.9258
AGAP4	0.958744	0.437052	1.03811	0.549584	0.763637	0.619265	1.89688	0.890523	1.10545	1.1883	0.539688	0.381808
AGAP5	2.19142	1.16547	2.07622	1.09917	0.381818	0.442332	0.94844	1.03894	1.10545	1.86733	0.269844	2.29085
AGAP6	9.45048	7.2842	8.30487	5.67904	6.10909	6.98885	8.06174	5.7884	5.96943	8.3181	8.09533	9.73609
AGAP9	2.05445	1.16547	1.38415	0.915974	0.763637	0.884665	0.47422	0.742102	0.22109	0.848786	1.88891	1.14542
AGBL2	0.547854	1.01979	0.346036	0	0.763637	0.530799	0.94844	0.742102	0.22109	0.679029	0.539688	0.190904
AGBL3	1.36963	0.874104	1.03811	0.183195	0.381818	0.619265	0	0.14842	0.44218	0.339514	0	0.954519
AGBL5	16.2987	14.8598	10.7271	8.06057	10.6909	9.28898	5.69064	8.31155	7.95925	7.97859	5.39688	7.06344
AGFG1	166.411	161.564	169.212	181.18	189.764	193.653	146.06	142.929	141.719	174.001	172.161	167.423
AGFG2	7.39603	8.59536	6.22865	6.9614	4.39091	4.33486	5.21642	6.5305	3.31635	9.84591	13.2224	9.35429
AGGF1	71.9058	81.0003	76.8201	59.7215	60.1364	57.5032	66.865	61.0008	55.0514	55.3408	67.7309	64.9073
AGK	3.83498	4.5162	4.15244	3.66389	2.67273	3.98099	1.89688	3.41367	2.43199	2.03709	2.96829	2.48175
AGL	65.6055	67.1603	76.128	45.0659	45.6273	54.9377	48.8446	52.244	43.7758	35.4792	38.048	36.2717
AGMAT	1.09571	1.45684	1.73018	0.915974	0.954546	0.707732	0.47422	0.742102	0.22109	1.35806	1.34922	0.572711
AGO1	45.8828	40.5002	42.2164	40.486	40.8546	38.7483	49.7931	35.0272	37.3642	32.9329	31.3019	36.0808
AGO2	139.292	127.911	114.884	213.605	203.7	206.746	184.471	186.416	194.78	384.839	352.686	365.581
AGO3	19.1749	17.7734	15.5716	22.8993	16.2273	21.5858	16.5977	19.1462	20.3403	28.1797	27.794	22.9085
AGO4	28.2145	30.885	28.0289	19.785	22.3364	19.6396	20.8657	25.0831	20.7825	28.3494	25.905	21.3812
AGPAT1	0.273927	0.145684	0.346036	0.183195	0	0	0	0	0	0	0	0.381808
AGPAT2	21.6402	24.4749	29.0671	27.1128	21.7636	21.4973	27.5047	23.0052	22.109	15.4479	18.8891	17.1813
AGPAT3	158.056	163.894	163.675	128.603	123.9	126.065	110.019	88.0134	101.701	75.7117	78.5247	83.2341
AGPAT4	7.1221	9.17809	7.26676	5.49584	5.34546	5.83879	5.69064	7.42102	3.53744	8.65761	10.5239	8.78158
AGPAT4-IT1	0.547854	0.437052	0.692073	0	0.190909	0.353866	0.47422	0.296841	0.22109	0.509271	0.269844	0.763615
AGPAT5	53.0049	50.4067	55.0198	50.9281	57.2728	55.7339	40.7829	40.3704	38.4697	116.623	111.446	104.043
AGPS	77.5213	71.8222	69.8993	41.0356	42	43.614	51.2157	55.064	51.514	40.9115	43.1751	39.1353
AGRN	72.4537	81.4374	102.427	43.9667	42	36.2712	56.4322	43.0419	50.4086	58.5662	69.35	62.2346
AGTPBP1	20.2706	19.6673	22.4924	12.6404	8.4	11.4122	9.95861	9.05365	7.95925	10.1854	8.09533	9.16338
AGTRAP	14.6551	17.4821	15.2256	25.0977	25.2	24.3283	24.1852	28.4967	29.1839	43.2881	40.7465	44.0988
AHCTF1	66.0164	65.4121	58.4801	70.8964	74.6455	71.4809	55.0095	62.485	60.3576	55.6803	69.0801	65.0982
AHCTF1P1	21.6402	23.7465	20.7622	27.1128	27.8727	27.9554	22.2883	22.8568	20.1192	23.9358	18.0796	20.6176
AHCY	63.688	72.2593	57.7881	57.5231	54.9818	57.5917	50.7415	47.7914	49.7453	36.6675	43.4449	37.9899
AHCYL1	214.074	200.753	194.818	256.289	246.273	260.091	297.336	306.488	310.632	366.675	355.925	389.635
AHCYL2	20.4076	22.7267	21.1082	25.0977	25.5818	26.8053	31.2985	28.0515	29.8472	30.5563	31.3019	32.8355
AHDC1	37.2541	44.2879	38.41	28.0288	26.7273	21.9397	30.8243	20.482	28.2995	23.9358	29.9527	23.863
AHI1	58.0725	58.1279	51.2134	109.55	102.327	108.106	118.555	117.104	119.831	95.5733	100.652	93.7338
AHNAK	2524.1	2507.51	2368.96	2071.57	2074.23	2115.23	2189.47	2080.26	2082.01	1536.13	1442.32	1473.4
AHNAK2	101.079	104.455	103.119	138.129	123.709	126.596	219.564	197.399	219.985	107.117	112.795	111.488
AHR	188.325	183.999	199.663	61.0038	59.5637	57.3263	50.2673	45.4167	50.1875	45.4949	49.9212	46.9623
AHRR	84.5065	85.9536	77.8582	30.2271	28.8273	30.5209	22.2883	18.9978	20.3403	34.6305	35.0797	35.699
AHSA1	67.1121	65.5578	59.8643	80.7889	75.9819	79.9737	72.0814	75.8429	72.7387	72.9956	73.1278	77.1251
AHSA2P	41.6369	41.957	41.1783	23.2657	33.7909	31.4941	29.8758	28.1999	30.9526	32.4236	26.7146	29.2083
AIDA	40.1303	40.6458	44.6387	63.019	60.7091	59.0956	53.1126	60.2587	62.7896	49.2296	55.0482	48.6805
AIFM1	24.1056	26.2231	21.4543	20.8842	23.1	21.232	15.6493	25.2315	20.5614	25.2938	24.5558	21.9539
AIFM2	17.2574	17.9191	15.9177	19.6018	13.7455	16.1009	12.3297	9.94417	14.3709	18.6733	17.5399	15.2723
AIG1	47.3894	46.1818	48.4451	47.4474	45.6273	47.418	21.8141	24.9346	21.4457	27.1611	29.1432	31.3082
AIM2	0	0	0	0.183195	0.572728	0.353866	1.42266	0.445261	1.76872	1.01854	0	1.33633
AIMP1	76.2887	84.4967	86.8551	56.9736	55.3637	57.8571	55.4837	53.5798	46.65	84.8786	90.6677	92.3974
AIMP2	8.6287	9.76083	8.30487	6.41181	7.25455	8.13891	3.31954	6.67892	5.96943	6.45077	5.12704	5.34531
AIP	17.1204	18.2105	18.3399	17.4035	13.1727	15.0393	16.5977	16.7715	20.1192	26.1426	29.413	24.8175
AIRE	0.136963	0	0	0	0	0	0	0.445261	0.22109	0	0.269844	0
AJAP1	21.6402	20.5414	18.686	17.0371	10.8818	13.6238	7.58752	7.56945	11.0545	29.0285	26.4447	28.6356
AJM1	2.73927	1.60252	3.46036	0.549584	1.33636	0.707732	0.94844	1.18736	2.2109	1.86733	1.61907	0.763615
AJUBA	99.5724	99.0651	102.081	22.3498	21.3818	24.6821	25.6079	23.7473	16.3607	29.8773	31.0321	33.5991
AK1	19.9967	16.7537	13.4954	16.4875	13.1727	12.7392	16.5977	14.6936	20.5614	14.7689	15.1113	19.6631
AK2	72.0428	65.1207	67.131	45.9819	42.7637	47.1526	37.4634	36.363	43.9969	44.6461	43.1751	44.8624
AK3	207.637	213.136	216.965	184.111	202.746	210.816	195.379	208.531	208.267	180.961	192.399	179.068
AK4	2.87623	4.07915	3.11433	4.57987	3.05455	3.36173	2.84532	1.92947	1.76872	1.1883	1.88891	2.67265
AK5	43.2805	44.2879	49.8292	58.6223	53.4546	55.0261	22.2883	22.7083	23.2145	6.62053	7.55564	6.29983
AK9	3.97194	3.93347	4.49847	4.57987	5.53637	5.39645	5.21642	6.08524	2.43199	4.92296	4.58735	6.10892
AKAP1	13.9703	17.7734	15.5716	12.4572	9.73637	9.73131	11.3813	12.4673	11.9389	4.7532	6.74611	4.39079
AKAP10	51.7722	48.5128	48.099	55.1416	58.9909	58.034	52.1642	53.5798	54.6093	65.696	60.1753	64.1437
AKAP11	312.277	320.942	328.735	356.68	385.637	371.825	289.274	295.95	289.849	381.444	380.48	358.136
AKAP12	245.028	255.675	262.296	473.925	481.473	507.886	410.674	407.563	412.112	837.582	906.946	902.021
AKAP13	105.736	98.0453	103.465	110.65	108.436	110.495	96.2666	92.6144	92.4157	161.439	151.113	160.359
AKAP14	0	0.291368	0	0	0.190909	0	0	0.14842	0.44218	0	0	0.190904
AKAP2	0.547854	0.291368	0.346036	0.732779	0.381818	0.530799	0	0.445261	1.10545	0.339514	0.269844	1.14542
AKAP3	0.41089	0.437052	0	1.64875	2.1	2.30013	2.84532	2.22631	2.2109	2.03709	2.4286	2.48175
AKAP5	8.21781	10.1979	10.7271	0.732779	1.52727	0.619265	2.3711	1.03894	1.32654	2.03709	2.15875	0.190904
AKAP6	18.2161	15.5882	15.9177	4.94626	3.62727	4.42332	7.1133	9.94417	8.84361	13.2411	11.3335	13.1724
AKAP7	3.42409	3.6421	4.15244	1.64875	0.954546	1.50393	0.94844	1.03894	1.10545	1.1883	0.269844	0.572711
AKAP8	26.7079	23.8922	28.721	29.4943	24.0546	30.5209	25.6079	29.0904	26.5308	33.1026	38.048	31.8809
AKAP8L	19.0379	19.376	19.378	18.6859	15.2727	17.9587	18.4946	13.8031	17.0239	24.6148	23.4764	23.4812
AKAP9	200.788	193.031	196.203	194.919	194.346	199.846	186.843	192.798	196.991	251.071	256.082	243.593
AKIP1	24.3795	24.4749	21.4543	22.5329	20.4273	21.5858	21.3399	23.5989	29.8472	28.1797	25.3654	24.4357
AKIRIN1	119.706	105.475	119.383	162.311	159.218	167.025	219.564	222.334	211.362	249.203	247.717	242.639
AKIRIN2	40.2673	41.2286	38.064	42.6844	44.4818	44.0563	47.422	40.5188	44.218	45.3252	38.048	41.0443
AKNA	5.20461	5.24462	5.88262	4.94626	4.96364	4.86566	9.01018	5.34314	9.50688	4.07417	6.47626	4.19988
AKNAD1	0.136963	0.291368	1.38415	0.366389	0.954546	0.265399	0.94844	0.445261	0.44218	0.339514	0	0
AKR1A1	28.6254	30.1566	27.6829	26.5632	33.9818	29.1939	46.4735	38.8862	39.354	33.4422	30.4924	35.1263
AKR1B1	245.986	219.837	203.123	600.879	557.264	503.816	571.909	545.891	570.855	162.118	146.795	158.068
AKR1C1	12.4637	10.6349	10.3811	17.4035	16.4182	14.8624	13.2782	15.4357	17.245	6.28101	4.31751	5.53621
AKR1C2	0.547854	1.60252	0.346036	1.09917	0	0.0884665	0.47422	0	0	0.339514	0	0.190904
AKR1C3	0.684817	1.31116	1.03811	0.915974	0.572728	0.884665	0.47422	0.14842	0.22109	1.01854	0.809533	1.33633
AKR1E2	2.19142	0.72842	1.03811	0.549584	0.763637	0.707732	0.94844	0.890523	0.22109	0.339514	0.269844	0.190904
AKR7A2	25.7491	27.2429	24.9146	41.9516	34.3637	36.4482	42.2056	38.5893	37.1431	38.7046	35.3496	37.9899
AKR7A2P1	0.547854	0.437052	1.03811	1.09917	1.14546	0.973131	1.42266	0.593682	0.44218	1.1883	1.07938	1.71813
AKR7A3	0.136963	0.145684	0	0.549584	0.572728	0.176933	0	0.14842	0.44218	0.169757	0.269844	0
AKR7L	0.136963	0.145684	0	0.549584	0.190909	0.176933	0	0	0.22109	0.169757	0.269844	0.381808
AKT1	155.59	164.477	153.64	134.648	132.3	126.861	120.452	108.199	114.967	85.5576	99.0328	90.4884
AKT1S1	42.7326	43.5595	38.7561	58.9887	62.2364	57.5032	51.69	51.2051	50.8507	69.2609	58.5562	63.1892
AKT2	73.1385	77.7953	82.7027	64.3013	70.0637	65.3767	65.9165	61.5945	71.191	48.0413	48.8418	49.0623
AKTIP	6.16336	10.4892	6.92073	1.64875	3.81818	2.21166	3.79376	2.81999	2.87417	3.05563	3.77782	3.24536
ALAD	35.4735	33.3616	33.9116	28.3952	31.6909	32.3787	36.5149	31.1683	34.7112	38.3651	34.0004	41.4261
ALAS1	32.1864	31.0307	23.5305	43.0508	46.3909	36.802	50.2673	42.7451	44.4391	27.6704	30.4924	30.3537
ALCAM	514.846	509.166	477.53	108.085	104.236	107.31	140.843	140.257	142.161	94.5547	93.9058	94.3065
ALDH16A1	11.6419	10.7806	12.8033	6.59501	9.16364	7.43118	9.01018	6.97576	9.0647	5.60199	8.63501	5.91802
ALDH18A1	132.718	128.93	132.878	79.6897	78.6546	74.9311	75.8752	82.6702	85.5619	82.1625	81.493	76.9342
ALDH1A1	195.036	184.582	177.517	4.39667	4.39091	5.48492	5.21642	5.7884	5.08507	3.22539	4.04766	3.24536
ALDH1A3	0	0	0.346036	0	0	0.176933	0	0.296841	0	0.339514	0	0.190904
ALDH1B1	53.4158	57.5452	51.2134	13.7396	11.6455	13.8008	7.58752	6.97576	11.2756	8.14834	11.8731	9.35429
ALDH1L2	105.325	104.747	102.773	31.3263	38.5637	42.8178	27.979	29.6841	33.8268	35.3095	33.7305	36.0808
ALDH2	22.8729	28.8454	22.8384	15.3884	12.6	16.2778	12.3297	19.5915	17.4661	10.3552	9.1747	11.836
ALDH3A2	14.1072	14.1313	12.8033	12.0909	12.9818	14.9508	26.0821	25.3799	23.4356	19.0128	18.6193	20.8085
ALDH3B1	23.1468	28.9911	29.7591	7.69418	9.35455	11.0583	12.8039	12.4673	10.6123	9.67616	8.90486	11.4542
ALDH4A1	15.3399	17.7734	15.9177	4.39667	2.86364	5.04259	3.31954	2.96841	5.08507	1.52781	4.58735	2.09994
ALDH5A1	0.958744	1.01979	1.38415	0.183195	0	0.442332	0.47422	0.445261	0.66327	0.679029	1.61907	0.381808
ALDH6A1	33.0082	31.0307	29.0671	18.3195	13.9364	17.3394	11.8555	14.5452	13.7076	15.7874	20.778	16.6086
ALDH7A1	35.0626	37.5865	32.8735	12.6404	13.5546	14.7739	16.5977	13.8031	17.4661	15.2781	12.143	13.7451
ALDH8A1	0	0.145684	0	0	0	0.442332	0	0.14842	0.44218	0.509271	0.539688	0.381808
ALDH9A1	128.472	129.222	120.075	114.68	116.646	121.288	127.565	117.104	135.307	108.645	100.382	114.542
ALDOA	476.359	490.664	425.971	559.66	552.109	527.614	641.145	554.202	588.542	464.116	435.259	487.377
ALDOC	4.51979	4.37052	6.22865	4.21348	5.34546	3.45019	2.3711	3.11683	3.31635	6.62053	6.47626	6.68163
ALG1	11.5049	9.76083	12.4573	8.42696	11.4546	10.1736	12.3297	11.4284	13.0443	8.82737	10.2541	9.35429
ALG10	4.51979	6.99283	7.95884	3.11431	4.39091	2.65399	3.31954	2.07789	2.87417	1.52781	2.96829	1.14542
ALG10B	21.7772	21.2699	17.9939	11.3581	9.54546	10.8814	12.8039	13.5063	14.1498	10.1854	10.5239	9.35429
ALG11	13.4224	15.8796	14.8796	10.9917	12.7909	10.0852	8.53596	9.05365	5.96943	12.3923	10.7938	14.3178
ALG12	17.1204	18.5019	21.8003	16.4875	14.3182	15.1278	20.8657	17.5136	19.0138	19.3523	18.3494	16.4177
ALG13	49.7177	52.7376	49.1372	52.7601	51.7364	54.3184	43.154	47.1977	49.9664	74.1839	78.5247	71.2071
ALG14	10.6832	14.5684	16.2637	10.0757	8.59091	10.0852	8.53596	10.0926	8.18034	9.67616	5.66673	9.16338
ALG1L9P	0	0.72842	0.692073	0	0	0.619265	0	0	0.22109	0	0.269844	0
ALG2	70.3992	72.6963	71.2835	71.8123	73.3091	65.2882	61.1743	68.125	65.4427	60.9428	62.6039	60.3256
ALG3	38.3498	34.2357	33.9116	43.234	41.2364	36.3597	45.9993	41.5577	40.6806	50.5876	54.7784	59.9438
ALG5	29.1732	33.216	31.1433	24.9145	30.3546	28.6631	23.711	33.2462	27.1941	27.1611	28.8733	30.7355
ALG6	12.8746	15.4425	10.7271	10.0757	6.3	6.90038	6.16486	8.45997	6.41161	5.60199	5.93657	2.48175
ALG8	57.2507	53.1747	51.2134	49.6458	44.1	47.2411	45.9993	47.7914	44.8813	40.4022	45.064	40.4716
ALG9	33.2821	36.5667	30.7972	24.7313	21.7636	22.0281	20.3914	19.8883	21.4457	25.2938	22.3971	21.5721
ALK	0	0.145684	0	0	0	0.0884665	0	0.296841	0.22109	0.169757	0.269844	0
ALKAL2	0.136963	0	0	0	0	0.0884665	0	0	0	1.01854	0.269844	0.572711
ALKBH1	13.5594	12.6745	14.1875	14.6556	13.5546	15.3047	10.9071	14.842	13.4865	18.5035	18.8891	19.4722
ALKBH2	4.93068	6.55578	7.6128	3.2975	4.58182	3.71559	3.31954	2.22631	4.86398	4.24393	3.23813	3.62717
ALKBH3	11.094	11.3634	11.0732	9.52612	7.63637	10.1736	6.16486	6.97576	7.29597	10.6947	12.9525	10.6906
ALKBH3-AS1	0.273927	1.01979	0	0.183195	0.190909	0.176933	0.94844	0.14842	0.22109	0	0.539688	0
ALKBH4	3.83498	4.37052	2.76829	2.93112	2.29091	3.36173	0	3.85893	3.97962	2.3766	3.77782	1.71813
ALKBH5	72.8646	63.5182	74.7438	78.0409	73.6909	69.1808	74.9267	78.8113	75.6128	76.221	75.2865	74.8343
ALKBH6	7.94388	10.4892	12.1113	7.14459	7.06364	5.92725	4.7422	8.01471	11.0545	10.5249	12.4128	12.0269
ALKBH7	8.90263	10.6349	7.95884	9.34293	12.6	8.49278	11.8555	9.94417	15.0341	10.3552	11.8731	11.6451
ALKBH8	17.9422	21.2699	20.0701	25.0977	29.7818	31.3171	23.711	27.6062	27.8574	35.9885	42.9052	42.3806
ALMS1	33.2821	30.7393	30.4512	23.0825	24.4364	24.9475	20.8657	17.662	17.245	30.5563	27.794	26.9174
ALMS1-IT1	0.958744	0.437052	0	0.549584	0.572728	0.796198	0.94844	0	0.22109	0.509271	0.269844	0.381808
ALOX12	1.78053	1.01979	1.38415	0.366389	0.381818	0.442332	0.47422	0.445261	1.32654	2.03709	0.539688	0.381808
ALOX12-AS1	1.23267	1.31116	1.73018	0.549584	0.572728	0.796198	0.47422	1.03894	0.44218	1.35806	0.539688	1.52723
ALOXE3	0.273927	0.145684	0.692073	1.64875	0.381818	1.327	2.3711	2.22631	1.98981	9.33664	12.4128	12.2178
ALPK1	14.1072	12.3831	14.5335	5.67904	8.59091	9.55438	4.26798	4.74946	7.51706	13.5806	9.71439	10.3088
ALPK2	160.795	145.538	125.265	29.6775	29.0182	28.5747	19.443	15.881	19.0138	58.3965	55.0482	60.7074
ALPK3	0.547854	0.291368	0.346036	0	0.763637	0.176933	0.94844	0.296841	0.22109	0.679029	0	0
ALPL	0.41089	0.291368	0	0.915974	1.52727	1.15006	0	0.296841	0.22109	4.92296	5.66673	4.00898
ALS2	110.94	118.441	128.033	55.8744	51.1637	56.1762	55.4837	56.845	53.7249	49.2296	52.8895	52.6895
ALS2CL	2.05445	2.91368	2.42225	0.366389	1.33636	1.41546	0	0.742102	1.10545	0.339514	1.07938	0.572711
ALS2CR12	0.821781	0.72842	1.38415	0.549584	1.14546	0.973131	0.94844	0.742102	1.32654	1.1883	0.539688	1.52723
ALX3	0.821781	0.72842	1.38415	1.09917	0.763637	0.973131	1.42266	1.03894	0.884361	1.01854	0.539688	0.763615
ALYREF	30.8168	30.3023	28.375	24.7313	19.2818	23.5321	23.711	21.6694	26.7519	19.5221	30.4924	24.0539
AMACR	0.547854	1.01979	0	0.366389	0.954546	0.353866	0.47422	0.593682	0.44218	0.169757	0	0
AMBRA1	20.6815	23.3094	19.032	18.8691	23.1	21.8512	27.5047	25.2315	21.6668	18.6733	22.1272	22.7176
AMD1	386.922	354.595	386.523	331.582	326.073	317.329	270.305	279.179	269.067	269.574	266.876	255.047
AMDHD1	0	0.145684	0	0.183195	0.763637	0.176933	1.42266	0.593682	0.66327	0.679029	0.539688	0.190904
AMDHD2	5.06765	5.82736	4.49847	8.61015	6.10909	8.13891	8.53596	8.16313	8.18034	8.65761	11.6033	8.20886
AMER1	6.43728	6.4101	6.57469	3.4807	5.53637	4.77719	5.21642	3.85893	2.87417	3.5649	2.4286	3.05446
AMFR	132.444	134.029	141.875	117.245	115.118	105.629	123.771	119.182	106.123	95.2338	95.255	92.5884
AMH	0.41089	0.145684	0.346036	0.183195	0.381818	0.0884665	0.47422	0.296841	1.10545	0.509271	0.809533	0.763615
AMIGO1	6.43728	5.39031	3.46036	3.2975	2.48182	2.1232	3.79376	2.52315	2.43199	3.22539	2.69844	2.67265
AMIGO2	17.5313	15.8796	13.1494	0.549584	1.33636	1.5924	1.42266	1.63263	0.44218	0.509271	2.15875	2.48175
AMIGO3	5.47854	3.35073	5.19054	2.38153	2.67273	3.45019	2.84532	3.71051	2.65308	3.5649	2.69844	2.09994
AMMECR1	65.6055	68.0344	61.9405	37.1885	37.6091	43.7024	57.8548	66.9376	57.4834	23.087	22.9368	21.1903
AMMECR1L	53.2788	50.5523	48.099	61.5534	63.7637	59.1841	58.8032	55.8061	63.2318	65.1867	62.334	58.2257
AMN1	8.90263	8.1583	7.95884	9.89251	8.4	11.5891	9.95861	12.0221	9.72797	12.7318	17.8097	12.9815
AMOT	1.64356	1.60252	1.73018	0.732779	0	0.707732	0.94844	0.296841	1.10545	1.01854	0.269844	0.572711
AMOTL1	208.732	190.118	195.164	127.504	133.636	124.207	147.008	124.673	125.579	89.9713	86.0803	81.325
AMOTL2	163.945	174.966	169.558	32.975	42.5727	30.9633	24.1852	20.482	23.2145	16.6362	17.5399	16.7995
AMPD2	90.5329	97.3169	93.4298	124.572	125.427	111.822	110.493	94.9891	101.701	107.117	118.731	115.879
AMPD3	18.901	18.3562	20.4161	150.586	156.355	151.012	87.2564	80.1471	90.647	58.9057	51.0006	55.553
AMPH	7.1221	8.59536	6.92073	4.76306	2.67273	2.38859	4.26798	5.0463	4.64289	3.39514	3.50797	3.24536
AMT	4.1089	1.60252	3.11433	0.732779	1.14546	1.8578	0.47422	0.445261	1.54763	1.52781	1.34922	1.52723
AMY2B	3.56105	4.22484	4.84451	4.57987	1.33636	3.27326	3.31954	3.85893	4.64289	3.90441	3.23813	2.29085
AMZ1	9.72441	11.072	7.6128	12.4572	11.4546	9.20051	7.1133	12.4673	11.0545	13.0713	15.9208	12.0269
AMZ2	48.0742	51.8635	43.9466	34.0742	31.6909	40.783	39.8345	38.5893	35.8166	44.1369	41.556	45.626
AMZ2P1	4.51979	3.05936	5.53658	1.09917	2.1	1.5924	1.42266	1.92947	1.32654	3.05563	2.4286	1.71813
ANAPC1	29.858	28.2627	25.2607	21.2506	21.9546	17.8702	21.3399	18.9978	19.2348	21.0499	17.0002	22.9085
ANAPC10	14.7921	14.4227	16.2637	13.0068	13.3636	14.42	9.95861	12.3189	10.8334	14.2596	22.1272	15.4632
ANAPC11	53.2788	62.7898	59.5182	40.486	38.3727	46.4449	45.9993	51.9472	51.514	47.1925	58.826	54.4076
ANAPC13	107.79	102.999	100.004	81.3384	74.8364	78.9121	54.5353	66.6408	65.8849	83.6903	87.4295	85.1431
ANAPC15	1.91749	2.91368	0.692073	2.19834	1.90909	1.8578	3.79376	2.07789	2.2109	3.5649	1.88891	2.86356
ANAPC16	58.6204	52.4462	52.5975	35.723	40.6637	34.325	35.5665	34.582	31.6159	39.3837	42.9052	40.4716
ANAPC2	16.5726	16.608	15.9177	13.7396	13.5546	15.0393	12.8039	11.5768	16.1396	13.0713	12.9525	12.7906
ANAPC4	40.1303	40.7915	42.5625	27.8456	33.7909	28.7516	24.6594	31.4651	31.1737	29.8773	29.1432	29.5901
ANAPC5	108.749	109.846	118.344	82.2544	79.2273	87.051	82.04	82.9671	86.2252	117.981	113.335	110.152
ANAPC7	58.7573	57.6909	60.9024	50.9281	51.1637	49.0989	60.2259	55.6577	52.8405	51.6062	48.3021	56.3166
ANG	0.547854	0.145684	0.346036	1.28236	1.90909	0.707732	0.94844	1.33578	1.54763	1.01854	0.809533	0.381808
ANGEL1	22.1881	17.1907	19.378	19.0522	21.1909	19.6396	22.2883	21.9662	23.2145	23.087	22.9368	25.1993
ANGEL2	51.0874	53.466	59.5182	50.3785	48.8727	46.9757	41.7313	39.3314	40.4595	37.0071	36.429	29.0174
ANGPT1	161.891	149.909	165.059	4.39667	4.2	4.77719	2.3711	7.12418	7.51706	1.1883	1.88891	2.09994
ANGPT2	0.684817	0.582736	1.38415	0.366389	0.572728	0.442332	0.47422	0.296841	0.44218	0.848786	0	0.381808
ANGPTL1	1.36963	1.89389	3.46036	0.366389	1.14546	0.707732	0	1.33578	1.54763	0.169757	0.539688	0.763615
ANGPTL2	13.9703	12.0918	12.8033	7.32779	6.68182	6.81192	16.5977	11.4284	11.7178	7.29956	6.74611	11.0724
ANGPTL4	3.97194	3.78778	4.84451	74.5602	73.8818	65.4652	178.781	151.389	167.365	72.6561	97.9534	84.5704
ANGPTL7	0	0	0.692073	0.183195	0	0	0.47422	0	0	0	0	0.381808
ANGPTL8	0	0.291368	0	0	0.381818	0.176933	0.47422	0	0	0.169757	0	0.190904
ANK1	19.4488	24.0379	17.9939	3.84709	3.05455	2.65399	1.89688	4.45261	5.08507	1.86733	1.61907	2.29085
ANK2	2.46534	3.35073	3.46036	1.46556	0.572728	1.23853	2.3711	1.63263	1.76872	1.1883	0.269844	1.33633
ANK3	0.136963	0	0	9.70932	11.6455	11.0583	15.175	12.4673	15.0341	8.82737	7.28579	7.25434
ANKAR	5.06765	4.07915	3.8064	2.19834	2.48182	3.18479	1.42266	1.92947	3.09526	4.07417	4.31751	3.81808
ANKDD1A	8.76566	11.9461	11.7652	5.49584	8.59091	8.31585	5.69064	6.67892	4.4218	7.46931	8.63501	7.44525
ANKDD1B	0.821781	0.145684	0.346036	0	0.190909	0.353866	0	0.445261	0.44218	0.169757	0.539688	0.572711
ANKEF1	3.56105	4.37052	6.57469	0.183195	0.763637	0.707732	0	0	0.22109	0.509271	0.809533	0.763615
ANKFY1	156.138	168.702	184.783	125.305	127.718	125.711	121.4	139.515	135.97	119.849	127.097	119.315
ANKH	71.4949	73.1334	59.5182	116.695	111.873	105.01	152.699	171.129	166.702	156.177	155.43	158.068
ANKHD1	10.4092	9.46946	7.95884	10.6253	9.54546	7.69658	10.9071	6.97576	9.50688	11.883	20.778	12.5997
ANKHD1-EIF4EBP3	0.273927	0.145684	0	0	0.381818	0.176933	0	0	0	0.169757	0.269844	0.190904
ANKIB1	194.077	193.76	200.009	167.623	173.918	165.875	164.554	155.545	158.743	170.097	161.367	157.114
ANKLE1	0.273927	0.437052	1.03811	0.366389	0.763637	0.353866	0.94844	0.890523	0.66327	0	0	0
ANKLE2	89.1632	89.1586	81.6646	96.1772	91.6364	96.0746	106.225	104.34	104.576	107.796	95.255	107.67
ANKMY1	2.46534	3.35073	3.46036	4.03028	3.24546	3.62712	2.84532	3.41367	1.76872	3.90441	4.31751	2.67265
ANKMY2	41.6369	34.5271	37.3719	23.6321	27.3	26.0091	20.3914	25.2315	25.8675	28.689	23.7463	29.0174
ANKRA2	30.8168	31.3221	27.6829	26.38	28.8273	31.7595	26.0821	28.0515	28.7417	31.4051	37.5083	32.2627
ANKRD1	2.32838	2.18526	1.73018	0	0	0.0884665	0	0	0	2.54636	0.539688	2.29085
ANKRD10	42.1847	40.3545	32.8735	44.5163	49.8273	42.6408	38.4118	41.4093	41.5649	129.525	117.382	118.933
ANKRD11	183.257	180.502	184.091	181.912	175.064	181.976	182.575	185.822	207.825	198.276	221.272	231.375
ANKRD12	179.148	172.636	183.745	162.677	148.336	152.516	138.946	147.975	139.066	193.523	218.574	189.758
ANKRD13A	299.128	310.307	329.427	114.497	122.946	111.291	80.1431	75.8429	77.3815	144.463	133.843	128.287
ANKRD13B	2.73927	2.47663	2.42225	2.38153	1.52727	1.8578	1.42266	1.63263	1.54763	0.848786	1.88891	1.14542
ANKRD13C	58.8943	59.8761	54.6737	60.4543	63	63.0766	52.6384	63.0787	63.8951	58.0569	54.2387	54.2167
ANKRD13D	17.5313	18.9389	14.1875	22.1666	17.9455	22.382	14.7008	20.1852	26.0886	27.3309	35.3496	37.6081
ANKRD16	2.87623	3.35073	2.76829	2.38153	3.24546	2.38859	1.42266	1.63263	2.43199	1.52781	4.04766	3.05446
ANKRD17	217.498	204.832	193.088	221.116	225.846	230.19	204.389	208.531	213.794	177.905	167.303	183.459
ANKRD18B	3.15016	2.768	1.38415	0.549584	1.14546	0.707732	1.42266	0.890523	0.66327	3.73466	4.04766	2.09994
ANKRD19P	3.83498	2.33094	1.73018	1.83195	2.67273	3.18479	3.31954	2.22631	2.2109	2.3766	2.4286	4.00898
ANKRD20A5P	0	0	0	0.549584	0	0.0884665	0	0.296841	0.22109	0.169757	0.539688	0.954519
ANKRD22	0	0.145684	0	0.183195	0.190909	0	0	0.14842	0	0.169757	0	0.763615
ANKRD23	1.36963	1.45684	1.38415	1.28236	0.572728	1.50393	2.3711	0.445261	1.32654	0.848786	1.61907	1.14542
ANKRD24	0.273927	0	0	0	0	0.176933	0.94844	0.14842	0	0	0	0.763615
ANKRD26	52.8679	43.5595	44.6387	40.3028	40.6637	41.8446	46.4735	36.5114	42.8915	57.8872	61.7943	55.9348
ANKRD27	44.2392	38.1692	40.4863	37.3717	30.3546	34.0596	30.8243	28.1999	32.0581	28.689	25.0955	33.0264
ANKRD28	164.219	156.319	164.367	130.984	141.655	143.493	120.452	125.267	115.409	116.963	103.35	110.533
ANKRD29	19.8597	19.5217	17.9939	40.6692	43.3364	39.456	53.1126	41.4093	44.4391	10.5249	9.98424	7.82706
ANKRD31	0.136963	0.145684	0	0.183195	0	0.0884665	0	0.14842	0	0	0.809533	0
ANKRD33B	12.6006	10.9263	13.4954	1.64875	1.71818	1.50393	1.42266	2.81999	2.87417	1.35806	1.07938	1.14542
ANKRD34A	9.86137	8.44967	12.1113	6.9614	5.72728	5.04259	4.26798	4.30419	3.75853	5.60199	7.01595	6.10892
ANKRD35	0.684817	1.01979	1.03811	0.549584	0.381818	0.619265	0.47422	0.14842	0.66327	1.35806	1.07938	0.763615
ANKRD36	4.1089	4.95326	5.53658	2.38153	2.67273	2.1232	1.42266	3.26525	2.2109	2.54636	2.4286	1.33633
ANKRD36B	1.64356	2.33094	1.73018	1.64875	0.954546	1.23853	0.47422	1.4842	0.884361	0.848786	0.539688	0.954519
ANKRD36BP1	29.4471	24.6206	31.1433	19.2354	20.4273	16.7202	18.4946	26.122	18.3505	21.7289	21.3177	21.763
ANKRD36C	11.9158	6.99283	8.65091	4.21348	4.00909	6.45805	7.58752	4.15577	3.09526	4.41369	4.04766	5.34531
ANKRD37	0.136963	0.582736	0.346036	1.28236	0.190909	1.327	1.89688	1.18736	1.10545	0.848786	0.269844	0.190904
ANKRD39	6.57425	5.24462	5.19054	5.67904	5.91818	4.77719	7.1133	5.34314	6.41161	6.45077	9.1747	8.78158
ANKRD40	118.473	103.727	111.77	107.169	99.6546	111.822	95.7924	94.9891	95.0688	81.8229	84.7311	86.6703
ANKRD42	33.83	27.3886	33.9116	38.2877	38.7546	36.802	28.4532	35.1757	37.1431	64.8472	58.2863	62.9983
ANKRD44	13.6963	14.5684	15.9177	18.6859	16.4182	18.3126	43.154	42.1514	43.1126	35.9885	38.3179	31.1173
ANKRD45	0.41089	0.145684	1.03811	0	0.190909	0.0884665	0	0	0	0	0.269844	0.190904
ANKRD46	12.1897	17.1907	17.3018	12.6404	16.2273	19.1088	24.1852	29.5357	25.2043	26.9914	25.0955	25.0084
ANKRD49	13.9703	11.2177	16.2637	11.9077	15.6546	14.5085	9.95861	11.5768	11.0545	17.1455	17.27	17.5632
ANKRD50	131.074	117.567	128.726	143.991	143.755	141.546	148.905	171.723	150.783	132.75	130.874	121.988
ANKRD52	165.452	164.914	155.024	158.463	162.846	146.412	189.688	170.387	174.882	176.378	172.161	180.213
ANKRD53	0.547854	0.437052	1.03811	0	0.190909	0.176933	0	0	0	0.339514	0	0
ANKRD54	19.1749	18.3562	16.9558	21.2506	21.1909	17.6048	26.5563	19.5915	24.0988	26.6519	27.2543	26.3447
ANKRD6	0.958744	0.874104	1.03811	1.09917	1.33636	0.619265	0.47422	1.03894	1.10545	0	0.809533	0.381808
ANKRD61	1.5066	1.60252	1.73018	0.366389	0.381818	1.0616	1.42266	0.890523	0.44218	1.01854	0.269844	0.190904
ANKRD65	0	0.437052	0.346036	0.183195	0	0.0884665	0	0.593682	0	0	0	0.190904
ANKRD9	16.1617	13.2572	17.6479	11.5413	13.1727	11.0583	11.3813	12.4673	9.94906	10.6947	16.1907	14.1269
ANKS1A	24.7904	30.885	20.0701	32.7919	34.5546	32.998	28.4532	28.0515	34.269	33.4422	34.2702	35.1263
ANKS1B	0.684817	1.16547	0.692073	0.549584	0.381818	0.442332	0.47422	0	0.44218	0	1.07938	0.381808
ANKS3	7.53299	8.01262	7.26676	4.94626	4.2	3.71559	9.01018	4.45261	3.31635	4.58344	5.39688	7.82706
ANKS6	18.0792	16.3166	12.4573	9.15974	10.3091	7.96198	12.8039	12.0221	9.72797	6.62053	6.47626	8.78158
ANKZF1	9.31352	10.0522	10.0351	7.32779	8.4	8.22738	11.3813	9.05365	9.28579	9.5064	5.93657	8.78158
ANLN	240.097	259.318	274.753	53.1265	54.7909	55.0261	8.06174	10.9831	7.07488	4.41369	2.69844	3.81808
ANO1	0	0	0	0	0.190909	0	0	0	0	0.848786	1.07938	0.572711
ANO10	75.7408	81.583	78.2042	105.52	111.682	114.387	86.7822	91.7239	89.3204	111.021	97.1439	102.706
ANO3	3.15016	3.6421	5.88262	0.915974	1.33636	1.68086	1.89688	1.03894	0.66327	0.848786	0.269844	0.190904
ANO4	22.1881	24.6206	21.4543	6.04543	4.00909	3.53866	2.3711	3.56209	4.64289	3.39514	5.39688	4.19988
ANO6	290.5	270.827	266.448	187.225	193.582	198.873	193.482	198.735	186.6	195.221	184.034	185.177
ANO7	0.684817	0.437052	0	1.28236	2.1	1.5924	0.94844	2.67157	3.53744	2.54636	2.4286	3.81808
ANO8	2.87623	2.768	3.11433	2.74792	4.77273	3.36173	5.69064	5.63998	5.96943	6.79029	7.82548	7.25434
ANOS1	0.958744	1.45684	1.03811	58.9887	52.5	56.6185	79.6689	95.8796	84.8986	55.5106	52.8895	48.6805
ANP32A	56.7029	52.1549	57.096	47.081	45.6273	42.8178	33.1954	42.1514	41.786	23.5962	30.7622	28.6356
ANP32A-IT1	0.684817	0.145684	0	1.09917	1.14546	0.884665	0.47422	0.742102	1.10545	1.35806	0.269844	0.572711
ANP32AP1	1.23267	2.33094	4.49847	2.56473	1.90909	2.1232	1.42266	1.63263	1.54763	1.69757	0.809533	0.954519
ANP32B	124.089	124.123	127.341	91.4142	80.9455	87.051	45.9993	49.2756	51.9562	72.3165	78.7945	82.0886
ANP32C	0.821781	1.60252	0.346036	0.915974	1.52727	1.23853	0.47422	1.03894	0.66327	0.848786	0.539688	0.572711
ANP32D	0.136963	0.291368	0.346036	0.183195	0.572728	0.353866	0.47422	0.14842	0.22109	0	0	0.381808
ANP32E	122.719	132.572	146.027	103.322	106.718	108.371	99.5861	101.816	95.0688	115.774	117.922	99.8427
ANPEP	595.106	626.733	593.106	3069.61	3058.17	2898.25	2455.98	2240.26	2384.02	2133.85	2120.17	2237.01
ANTXR1	359.118	318.174	289.632	198.4	197.591	207.631	171.193	174.988	184.168	83.181	74.477	77.8888
ANTXR2	130.663	131.116	132.878	207.01	219.164	215.327	184.471	180.925	173.556	289.606	260.13	272.611
ANXA1	1089.13	1105.3	1116.31	1509.52	1473.25	1544.62	2188.05	2337.77	2198.74	1306.28	1303.35	1267.41
ANXA10	1.5066	0.72842	1.38415	54.0424	55.5546	54.3184	48.8446	42.5967	47.3133	12.9015	13.4922	14.5087
ANXA11	140.114	140.876	148.45	86.4679	86.2909	77.6736	78.2463	77.0302	89.5415	66.2053	52.6196	65.2891
ANXA2	852.872	871.627	810.417	555.446	531.3	561.85	732.67	744.032	754.802	911.935	925.026	1010.45
ANXA2P1	24.7904	25.4947	19.378	11.9077	11.8364	17.8702	19.9172	20.482	17.4661	20.2011	23.2066	20.6176
ANXA2P2	431.983	430.788	438.082	282.12	282.164	298.309	349.026	363.037	350.87	427.618	411.512	414.643
ANXA2P3	9.17655	9.32378	10.3811	5.49584	7.06364	5.48492	5.69064	9.20207	7.07488	10.8645	13.7621	12.2178
ANXA2R	1.09571	1.01979	0.346036	1.64875	2.29091	2.1232	3.79376	2.67157	3.53744	1.69757	3.77782	1.52723
ANXA3	5.20461	4.37052	6.22865	0.915974	0.763637	1.0616	0	0.445261	0.22109	0	0.809533	0.190904
ANXA4	122.171	124.414	130.11	83.72	83.0455	88.9973	90.576	114.877	100.154	58.736	55.0482	52.3076
ANXA5	1015.04	991.234	993.816	740.839	756.191	760.812	564.322	595.908	603.134	610.956	634.943	628.837
ANXA6	331.315	339.298	307.28	172.02	167.809	175.341	178.307	176.62	172.671	119.849	126.017	133.06
ANXA7	178.053	185.893	180.977	161.395	169.527	167.644	156.493	166.083	159.185	178.415	156.24	167.423
ANXA9	0.958744	1.16547	0	1.09917	0.572728	0.796198	1.42266	1.03894	0.66327	0.848786	0.539688	0.190904
AOC2	1.64356	0.437052	0.692073	0.366389	1.14546	0.707732	0.47422	1.4842	1.10545	2.20684	2.96829	1.33633
AOC3	0	0.145684	0	0.183195	0.190909	0.353866	0.94844	0.445261	0	0.509271	0.269844	1.14542
AOX1	62.5923	63.5182	68.5152	32.4255	33.2182	33.7942	7.58752	10.5379	9.50688	21.7289	25.0955	21.763
AP1AR	55.0593	52.3006	57.442	125.122	137.646	135.442	122.349	132.836	135.307	167.89	164.065	155.778
AP1B1	85.1913	92.5093	92.3917	65.4005	60.1364	64.1382	72.0814	60.704	69.4223	52.9642	58.2863	56.8893
AP1G1	203.391	192.303	197.241	196.934	194.727	191.707	159.338	180.776	163.386	235.962	212.637	232.712
AP1G2	9.03959	9.46946	6.92073	4.39667	4.96364	4.86566	4.26798	4.89788	5.08507	4.41369	3.50797	4.7726
AP1M1	68.3448	66.5776	71.9756	54.9584	52.1182	54.2299	69.2361	54.3219	58.3678	63.9984	70.4293	71.5889
AP1S1	44.3762	47.3473	49.1372	59.3551	56.3182	50.4259	61.1743	52.8377	53.7249	76.7302	77.1754	83.8068
AP1S2	36.9801	31.0307	36.6799	22.7161	27.8727	25.7437	40.3087	43.6356	43.5548	37.5163	40.7465	36.8444
AP1S3	16.7095	13.6943	19.032	3.66389	3.62727	3.36173	7.1133	6.23366	6.41161	0.848786	1.61907	0.954519
AP2A1	70.1253	74.7359	73.7057	58.6223	56.5091	54.5838	65.9165	64.8598	58.1467	67.5633	64.4928	61.8528
AP2A2	4.38283	5.09894	3.11433	3.84709	4.00909	4.24639	3.79376	6.82734	5.08507	2.88587	4.04766	4.19988
AP2B1	278.173	266.456	250.53	182.096	203.7	196.13	174.039	189.681	176.209	172.304	160.018	166.468
AP2M1	448.829	460.361	432.891	324.987	324.927	337.588	368.943	370.161	368.778	411.491	401.258	436.597
AP2S1	79.8497	82.7485	78.8963	92.1469	89.5364	89.7935	108.596	111.019	114.304	101.854	103.62	105.379
AP3B1	135.32	133.592	140.145	144.907	147.764	148.27	156.018	167.864	161.175	160.081	148.144	154.632
AP3D1	198.323	197.547	203.469	202.247	213.055	195.599	200.595	184.487	191.906	225.098	218.844	225.648
AP3M1	119.569	124.56	122.843	116.878	116.073	119.518	99.1119	98.2544	110.545	94.2152	99.5725	95.6428
AP3M2	31.7755	31.1764	28.721	19.785	22.5273	24.7706	18.4946	25.6767	19.677	26.6519	28.0638	26.9174
AP3S1	104.503	104.018	115.576	82.6208	84.3819	87.8472	77.772	86.5291	78.9292	67.9029	56.3974	62.0437
AP3S2	1.36963	1.31116	3.46036	1.09917	0.572728	0.973131	0.94844	1.18736	1.10545	2.03709	3.50797	1.90904
AP4B1	11.231	8.59536	11.4192	9.15974	7.25455	7.96198	3.31954	8.16313	6.85379	7.80883	5.66673	7.63615
AP4B1-AS1	0.821781	0.582736	0.346036	1.64875	1.52727	0.796198	0	0.593682	1.10545	0.509271	0.269844	0.381808
AP4E1	60.6748	53.7574	70.9374	53.8592	56.8909	55.9108	59.7517	52.6893	55.7147	89.2923	95.255	88.0067
AP4M1	5.75247	5.09894	4.15244	5.67904	7.44546	9.46591	13.2782	9.05365	11.2756	10.6947	8.36517	10.4997
AP4S1	8.76566	8.1583	8.30487	9.34293	7.06364	7.51965	8.53596	5.63998	7.95925	7.1298	7.55564	8.97248
AP5B1	14.3812	16.3166	15.9177	23.4489	21	18.3126	25.6079	21.9662	22.5512	24.2753	21.0478	25.1993
AP5M1	87.3827	83.6226	88.5853	68.3316	72.1637	70.0654	74.4525	67.6797	64.5583	59.9243	70.4293	54.4076
AP5S1	9.17655	8.74104	10.3811	7.87737	7.63637	8.13891	9.95861	8.16313	10.8334	10.1854	12.9525	12.2178
AP5Z1	24.2425	23.6008	24.2225	29.4943	28.6364	26.7169	33.6696	28.1999	30.9526	31.9143	34.5401	27.872
APAF1	67.7969	65.9948	67.8231	54.4088	45.6273	52.726	64.4939	55.2124	57.0413	49.5691	42.6354	42.7625
APBA1	1.09571	1.31116	1.73018	4.39667	5.34546	3.18479	2.84532	1.78105	2.43199	1.69757	2.4286	2.29085
APBA2	0.41089	0.582736	0	0.183195	0.190909	0.265399	0.47422	0.14842	0.22109	0.848786	1.07938	0.381808
APBA3	7.80692	8.44967	8.99694	8.79335	7.63637	6.28112	8.53596	7.2726	7.29597	5.9415	8.36517	7.06344
APBB1	27.5297	27.9713	29.7591	27.296	29.5909	28.6631	34.1438	32.3557	38.0275	40.2324	49.1116	47.3441
APBB1IP	82.0411	73.8618	68.1692	64.8509	65.1	64.5805	43.154	50.9082	53.5038	61.2823	60.7149	71.0162
APBB2	125.869	126.162	138.415	200.232	186.709	197.015	110.493	122.002	121.378	196.579	181.065	187.849
APBB3	4.51979	6.26441	5.88262	2.93112	2.29091	3.98099	3.79376	2.96841	5.74834	2.3766	3.50797	2.29085
APC	131.622	135.486	134.954	95.6276	96.9819	99.2594	67.8134	81.6313	83.1299	97.1011	96.0645	90.8702
APC2	1.36963	1.16547	2.07622	1.28236	0.954546	0.796198	4.7422	1.92947	2.87417	4.07417	1.88891	2.48175
APCDD1	9.31352	10.1979	9.34298	2.19834	2.67273	1.41546	2.84532	1.18736	1.10545	0.509271	0.809533	0.190904
APCDD1L	39.5824	42.9768	30.1052	132.633	132.873	131.019	153.173	165.34	170.239	291.134	283.606	298.001
APCDD1L-DT	5.6155	4.22484	3.46036	8.61015	8.59091	12.4738	12.3297	12.0221	11.4967	28.1797	34.5401	30.9264
APEH	47.8003	45.8905	42.2164	36.0894	37.9909	37.3328	28.4532	29.5357	27.6363	35.649	39.6671	43.5261
APEX1	108.749	108.098	106.579	97.4596	96.4091	97.4016	94.844	88.0134	82.0244	79.7859	88.2391	86.6703
APEX2	13.6963	14.4227	11.4192	14.6556	13.9364	12.4738	9.4844	12.0221	13.9287	8.82737	12.4128	10.4997
APH1A	71.7689	69.6369	64.7088	66.4997	59.3728	52.0183	42.2056	50.9082	52.3984	37.0071	44.2545	42.3806
APH1B	39.1716	42.8311	44.9847	55.3248	50.9727	54.8492	65.9165	77.3271	68.3169	38.3651	38.5877	34.1718
API5	157.919	149.763	153.64	118.71	120.655	126.861	128.514	127.345	118.725	146.67	146.256	127.715
APIP	24.2425	24.1835	29.7591	29.4943	35.7	35.2981	32.7212	31.9104	29.1839	33.4422	35.3496	30.3537
APLF	6.57425	6.70146	4.84451	5.86223	3.62727	5.13105	4.26798	4.60104	3.97962	4.24393	2.69844	2.86356
APLP1	4.65676	5.53599	4.15244	2.56473	1.52727	2.1232	2.84532	4.30419	3.97962	16.4664	17.0002	18.3268
APLP2	912.177	891.877	852.287	1402.72	1351.64	1321.95	1454.91	1428.25	1394.42	977.801	920.708	969.982
APMAP	88.0675	89.1586	90.3155	78.4073	76.7455	84.9278	104.803	99.2933	97.5008	80.9742	81.493	85.334
APOA1	0	0.145684	0	0	0	0	0	0	0	0.509271	0	0.572711
APOA1-AS	0.136963	0.437052	0	0.183195	0.190909	0	0.47422	0.14842	0.22109	0.509271	0	0
APOBEC2	0.547854	0	0.346036	0	0	0	0.47422	0.14842	0.22109	0.169757	0	0.190904
APOBEC3B	0.958744	1.89389	3.46036	1.09917	0.572728	0.530799	0	0	0	0	0	0.190904
APOBEC3C	22.325	26.6602	26.6448	15.2052	12.0273	13.5354	17.5461	13.8031	17.245	12.0528	10.5239	14.1269
APOBEC3D	1.09571	0.145684	1.38415	0.366389	0.763637	0.530799	0.94844	1.18736	0.44218	1.52781	0.539688	0.954519
APOBEC3F	3.15016	2.33094	4.15244	1.28236	0.763637	1.76933	4.7422	2.67157	3.09526	1.69757	1.07938	2.48175
APOBEC3G	1.78053	1.74821	3.11433	1.83195	1.14546	2.21166	2.3711	2.96841	3.75853	2.3766	2.15875	2.09994
APOBEC4	0	0	0.692073	0	0	0	0.47422	0	0	0	0	0.190904
APOC1	0.136963	0.437052	0	0.183195	0.381818	0	0.47422	0.296841	0.22109	0.679029	1.61907	0
APOD	3.15016	1.16547	2.42225	1.46556	1.14546	1.23853	0.94844	1.18736	1.76872	0.339514	1.61907	1.71813
APOE	0.547854	0.291368	1.03811	0.366389	0.572728	0.176933	0	0.14842	0.22109	1.52781	1.07938	0.954519
APOL1	8.76566	7.42988	7.6128	0.732779	0.572728	0.707732	0.47422	0.593682	2.2109	0.339514	0.539688	0.572711
APOL2	24.6534	24.1835	22.8384	6.22862	4.2	6.54652	16.1235	16.4747	16.1396	9.84591	10.2541	14.5087
APOL3	2.73927	2.03958	1.73018	0.183195	0.763637	0.442332	0.94844	0.445261	0.44218	0.509271	0.269844	0.954519
APOL6	43.9653	46.1818	59.8643	13.9228	16.0364	16.0124	17.0719	19.7399	19.2348	19.1826	21.5875	17.7541
APOLD1	25.7491	25.2033	27.3369	9.52612	8.78182	8.40431	9.95861	8.45997	8.62252	9.33664	10.2541	8.20886
APOO	5.47854	5.09894	7.6128	3.84709	4.39091	3.62712	7.1133	4.60104	5.30616	5.77174	4.31751	5.53621
APOOL	56.7029	50.9894	50.1753	41.7684	45.2455	36.979	34.1438	36.8083	38.0275	50.9271	48.8418	47.535
APOOP5	0.136963	0	0	0.366389	0	0.176933	0	0.14842	0	0.169757	0	0.381808
APOPT1	28.2145	32.4875	32.8735	26.7464	30.9273	27.3361	28.9274	31.1683	32.9424	36.8373	37.5083	41.617
APP	722.893	703.945	676.501	902.6	913.882	851.755	888.214	926.441	925.704	642.022	617.134	620.056
APPBP2	145.318	132.572	156.408	125.305	126.382	125.357	119.503	121.111	105.681	132.58	138.7	129.433
APPL1	84.7804	83.7683	87.2012	94.8949	93.5455	102.444	102.431	98.2544	96.1742	91.4991	89.5883	84.7613
APPL2	173.259	172.198	161.599	105.52	105.764	105.894	90.1018	86.826	81.8034	53.9828	56.6673	56.1257
APRT	41.4999	50.698	46.0228	53.3097	50.4	46.5334	45.9993	45.7135	46.2078	55.5106	55.5879	58.0348
APTR	4.93068	8.01262	5.88262	3.11431	3.43637	3.27326	2.84532	3.85893	3.53744	5.26247	2.96829	2.67265
APTX	28.6254	24.912	26.6448	17.9531	19.2818	23.2667	18.0204	23.8957	24.3199	29.7075	24.8257	29.5901
AQP1	0.547854	0.582736	1.03811	0.183195	0.190909	0.176933	0	0.14842	0.22109	0.509271	0.269844	0.572711
AQP11	3.28712	1.89389	2.07622	1.83195	1.52727	2.03473	3.79376	1.78105	2.2109	2.54636	2.4286	1.71813
AQP3	0.41089	0.145684	0.346036	0.183195	0.190909	0.0884665	0.47422	0	0	3.39514	2.4286	2.67265
AQP7P1	0	0	0	0	0.190909	0	0	0	0.66327	0	0	0.190904
AQP7P3	0.136963	0	0	0	0	0.176933	0	0	0.44218	0	0.269844	0
AQR	75.1929	65.8492	65.7469	60.6374	64.9091	63.4305	68.7619	63.2271	61.242	76.7302	65.3023	69.2981
AR	58.6204	56.6711	53.9817	28.0288	29.2091	28.2208	35.5665	32.6525	28.2995	17.6547	16.7303	20.9994
ARAF	33.0082	39.3347	34.6036	26.7464	31.1182	25.7437	27.0305	29.3873	32.7213	31.7446	32.3813	31.1173
ARAP1	52.594	53.3203	47.407	96.91	82.2819	82.1853	91.5244	75.8429	86.4462	79.2766	81.7628	74.4525
ARAP1-AS2	0.136963	0.582736	0.346036	0.549584	0.572728	0.796198	1.42266	0.890523	0.44218	1.1883	1.61907	0.572711
ARAP3	14.2442	14.277	13.1494	32.975	29.7818	32.0249	37.4634	26.122	23.6566	43.1183	46.9529	42.7625
ARC	0	0	0	1.28236	0.381818	0.530799	0	0.445261	0.66327	60.094	60.9848	63.7619
ARCN1	444.72	424.523	393.789	501.953	490.827	495.766	577.125	555.835	544.103	598.564	547.514	582.066
AREG	15.8878	18.0648	23.5305	114.13	131.346	121.111	97.6893	97.2154	105.239	152.612	191.32	179.45
AREL1	45.061	45.4534	41.5244	66.4997	71.7818	62.1919	83.4627	73.4681	79.8135	92.1781	85.8105	82.4704
ARF1	483.481	503.63	506.251	583.475	584.755	574.059	524.013	524.963	535.259	491.107	506.228	527.467
ARF3	137.922	146.704	130.11	163.41	161.891	154.02	185.894	161.927	166.702	181.64	167.303	192.049
ARF4	728.235	701.177	748.823	664.081	670.664	657.925	705.165	755.46	716.111	943.68	893.994	872.24
ARF4-AS1	0.547854	0.437052	1.03811	0.183195	0.190909	0.0884665	0	0.296841	0	0.848786	0.809533	0.381808
ARF5	39.3085	42.8311	38.7561	33.1582	33.0273	30.0786	36.0407	33.6915	40.0173	35.1397	34.0004	32.2627
ARF6	245.849	250.285	271.985	126.771	126.764	123.322	114.287	116.807	114.304	84.0298	84.7311	73.498
ARFGAP1	63.688	70.8024	65.4009	71.6291	75.4091	66.7037	73.9783	72.5776	80.2557	87.2552	91.2073	93.7338
ARFGAP2	31.0907	31.1764	31.8353	23.4489	25.5818	27.1592	27.5047	22.5599	20.5614	29.5377	26.7146	29.5901
ARFGAP3	131.485	136.506	138.761	112.848	114.164	125.269	144.163	137.437	139.066	141.917	144.097	144.514
ARFGEF1	139.977	134.758	134.262	134.282	133.636	126.33	130.885	119.924	117.62	140.389	137.621	133.251
ARFGEF2	163.534	155.299	153.64	163.959	166.473	171.979	161.709	152.131	147.467	143.105	138.7	148.905
ARFGEF3	0.136963	0.145684	0.346036	0.183195	0.190909	0	0.47422	0	0.884361	0.169757	0.539688	0.190904
ARFIP1	94.0939	86.2449	90.3155	85.9183	82.0909	94.2168	80.6174	89.0523	87.3306	102.364	98.4931	99.0791
ARFIP2	34.6518	39.7717	32.1814	39.2037	43.9091	40.3407	42.6798	40.6672	45.9867	42.4393	45.064	43.5261
ARFRP1	21.0924	22.581	22.4924	19.785	14.3182	17.9587	13.7524	16.6231	19.2348	16.9757	15.3811	16.4177
ARG2	16.7095	16.4623	15.2256	36.8221	33.6	32.2903	36.5149	37.8472	44.6602	27.8402	27.794	34.9354
ARGFXP2	0.273927	0	0	0	0	0.176933	0	0.445261	0	0.169757	0	0.190904
ARGLU1	116.419	119.17	120.767	95.8108	92.7819	93.7744	91.0502	85.0449	93.7422	91.4991	106.319	104.997
ARHGAP1	112.31	122.52	103.119	98.0092	91.6364	96.2515	93.8955	86.2323	97.5008	80.9742	83.6517	83.9977
ARHGAP10	39.7194	42.6854	47.753	32.975	34.9364	33.8827	34.1438	31.0199	31.6159	21.3894	18.8891	19.854
ARHGAP11A	0.547854	0.437052	0	0	0.381818	0.265399	0.47422	0.296841	0	0.169757	0	0
ARHGAP12	104.64	101.542	100.004	97.2764	98.7	92.2705	74.4525	85.4902	82.4666	93.3664	83.6517	93.352
ARHGAP17	54.2375	54.0488	53.9817	33.5246	31.5	31.3171	38.886	40.8156	32.7213	32.5934	28.6035	33.0264
ARHGAP18	165.589	165.643	155.024	176.05	170.1	185.868	127.565	116.955	139.95	161.609	156.51	159.214
ARHGAP19	12.1897	15.0055	13.4954	12.4572	15.4636	16.4548	28.9274	24.341	26.0886	23.087	21.0478	21.9539
ARHGAP20	13.6963	13.9857	12.4573	0.732779	0.381818	0.707732	0.47422	0.742102	0.22109	0.169757	0.539688	0.572711
ARHGAP21	165.863	164.623	146.719	255.007	260.4	255.933	220.512	241.183	240.325	219.326	199.415	206.176
ARHGAP22	41.089	45.162	40.1402	126.221	124.473	126.861	116.658	107.902	116.072	141.068	151.652	161.123
ARHGAP22-IT1	0	0.145684	0.346036	0.183195	0.190909	0.530799	0	0.445261	0	1.01854	0	0.381808
ARHGAP23	2.87623	2.768	3.11433	2.74792	3.43637	1.8578	1.42266	2.22631	3.75853	2.20684	2.96829	2.86356
ARHGAP24	59.0313	59.2934	47.407	102.223	98.7	102.267	75.4009	84.8965	86.0041	73.3351	64.7626	66.0527
ARHGAP26	4.79372	7.57557	4.15244	5.86223	5.53637	5.83879	13.7524	13.061	9.72797	13.9201	13.2224	17.1813
ARHGAP27	0.136963	0.437052	0	0	0	0	0	0.296841	0	0.169757	0.269844	0.190904
ARHGAP27P1	2.60231	2.33094	2.07622	3.2975	2.67273	3.98099	5.21642	3.56209	2.87417	4.24393	4.04766	3.24536
ARHGAP27P1-BPTFP1-KPNA2P3	10.1353	7.2842	8.99694	17.9531	15.0818	17.4279	17.0719	22.7083	24.0988	20.2011	11.8731	20.8085
ARHGAP28	0.684817	0.582736	0.692073	1.09917	0.572728	1.327	1.89688	1.92947	1.32654	0.679029	0.269844	1.14542
ARHGAP29	708.238	720.99	767.163	190.156	179.264	182.064	67.3392	71.3903	74.2863	116.793	116.573	113.206
ARHGAP30	0	0.145684	0	0.183195	0.190909	0	0	0.14842	0	0.339514	0.269844	0.190904
ARHGAP31	31.6386	33.653	32.1814	58.4391	57.2728	53.2568	42.2056	49.424	50.4086	51.6062	47.4926	57.0802
ARHGAP32	23.9686	25.0576	21.8003	23.2657	19.0909	24.3283	29.4016	25.2315	23.6566	45.1554	35.6194	37.6081
ARHGAP33	4.24587	4.22484	3.11433	0.915974	1.14546	1.50393	1.42266	0.445261	0.44218	2.03709	1.88891	1.90904
ARHGAP35	145.181	140.876	129.418	81.5216	91.8273	88.1126	82.9885	66.1955	72.7387	79.1068	85.5406	82.8523
ARHGAP39	4.24587	4.22484	4.15244	5.86223	6.49091	4.86566	8.53596	7.12418	5.52725	7.63907	8.36517	7.06344
ARHGAP42	4.51979	5.53599	6.92073	4.94626	7.25455	5.30799	6.63908	8.90523	7.73815	7.1298	9.1747	5.1544
ARHGAP44	2.46534	3.35073	4.49847	1.46556	2.86364	1.76933	2.3711	2.07789	2.2109	2.20684	3.23813	3.05446
ARHGAP45	2.05445	2.18526	1.03811	1.64875	1.33636	1.50393	0.47422	2.22631	1.10545	3.39514	2.96829	1.90904
ARHGAP5	255.848	252.47	289.978	315.828	310.991	318.568	494.611	549.156	515.803	431.183	408.544	388.298
ARHGAP5-AS1	2.05445	1.89389	2.07622	4.03028	6.10909	4.24639	16.5977	15.2873	10.3912	7.97859	7.01595	7.63615
ARHGAP6	5.34158	2.91368	3.8064	1.28236	1.14546	1.76933	1.89688	2.67157	1.54763	1.52781	1.61907	2.29085
ARHGAP9	0.136963	0	0.346036	0.366389	0.381818	0.176933	0	0	0.22109	0	0.269844	0
ARHGDIA	151.482	159.67	157.1	122.74	130.009	120.58	122.823	118.885	118.504	129.525	136.271	134.396
ARHGDIB	3.0132	3.35073	1.38415	0.366389	0.763637	0.619265	0	0.296841	0.44218	1.52781	1.34922	1.14542
ARHGEF1	30.6798	36.5667	31.8353	32.975	31.3091	31.2287	38.886	31.1683	35.5955	39.0441	38.8576	42.5716
ARHGEF10L	7.80692	10.4892	8.99694	7.32779	6.3	8.05045	15.175	8.45997	10.1701	6.45077	5.12704	5.1544
ARHGEF11	41.226	38.8976	37.718	47.2642	46.0091	44.5871	49.3189	47.4946	49.9664	48.211	52.6196	49.0623
ARHGEF12	442.803	418.404	416.974	348.986	368.646	365.986	334.799	342.703	361.04	452.403	412.052	418.27
ARHGEF17	110.256	119.315	114.884	69.0644	63.3818	65.5536	55.0095	56.2514	59.9154	69.9399	70.1595	63.1892
ARHGEF18	23.4208	26.2231	23.5305	26.1968	19.4727	22.6474	25.1336	24.0441	24.7621	20.0313	27.794	25.5811
ARHGEF19	1.5066	3.78778	3.46036	2.38153	2.29091	2.47706	1.42266	3.85893	2.87417	1.69757	2.69844	3.62717
ARHGEF2	55.7441	51.2808	43.9466	51.8441	56.3182	53.6991	44.1024	37.402	42.6704	46.853	43.7148	46.7714
ARHGEF25	15.3399	13.5486	12.1113	11.9077	13.7455	11.5006	15.175	9.35049	13.2654	13.2411	9.98424	10.1179
ARHGEF28	67.7969	62.6441	51.5594	50.1953	45.2455	52.9914	33.1954	37.6988	36.9221	28.8587	28.6035	24.4357
ARHGEF3	4.24587	4.5162	4.15244	8.79335	7.82728	7.87351	11.8555	10.6863	11.4967	19.1826	17.8097	13.5542
ARHGEF33	1.23267	1.74821	1.73018	0.366389	0.190909	0.619265	0.47422	0	0.44218	0.679029	0	0.763615
ARHGEF35	0.684817	0.145684	0.346036	0	0.190909	0.353866	0	0.14842	0	0.339514	0	0.381808
ARHGEF37	1.09571	0.291368	1.03811	0	0.190909	0	0.47422	0	0	0	0	0
ARHGEF38	0.821781	1.01979	1.73018	0.183195	0.381818	0.442332	0	0.296841	0.884361	0.169757	0	0.381808
ARHGEF39	2.19142	1.31116	2.07622	2.74792	0.572728	2.03473	0.47422	0.742102	1.32654	0.848786	1.88891	1.71813
ARHGEF4	2.05445	3.49642	2.42225	1.64875	0.381818	0.796198	1.42266	0.445261	0.44218	1.52781	1.61907	1.52723
ARHGEF40	63.0032	63.8096	58.4801	66.1333	65.2909	61.7496	84.4111	72.2808	70.0856	63.3194	63.9531	66.2436
ARHGEF5	0.273927	0.291368	0.692073	0.366389	0	0	0	0	0	0.169757	0	0
ARHGEF6	9.86137	10.1979	12.8033	17.5867	16.8	16.8971	25.1336	21.8178	22.5512	19.5221	17.8097	18.7086
ARHGEF7	62.8662	64.6837	62.6326	64.3013	65.4818	69.7116	73.5041	69.6092	68.759	58.5662	58.5562	61.471
ARHGEF9	13.4224	11.8004	11.7652	7.14459	8.59091	7.87351	7.1133	6.5305	6.85379	9.5064	5.66673	7.82706
ARID1A	97.518	94.2575	108.655	74.9266	79.9909	72.454	71.6072	59.0714	59.6943	56.6989	68.8103	59.9438
ARID1B	72.4537	69.6369	65.7469	75.4762	74.4546	80.8583	76.8236	68.5703	81.8034	71.977	79.3342	80.3705
ARID2	45.3349	47.3473	47.407	42.318	40.0909	38.0406	36.5149	37.5504	41.1228	40.7417	42.0957	34.1718
ARID3A	21.7772	18.0648	21.1082	20.3346	19.8546	20.2588	32.2469	21.6694	20.3403	30.5563	34.2702	29.2083
ARID3B	2.19142	2.47663	3.11433	4.76306	4.00909	4.95412	4.26798	4.45261	3.75853	14.4294	11.6033	12.9815
ARID4A	55.7441	50.261	56.0579	46.7147	44.8637	44.764	48.3704	42.5967	46.4289	53.134	57.4768	53.0713
ARID4B	110.393	114.362	120.767	107.169	118.173	118.545	116.184	103.598	109.661	121.886	123.858	113.206
ARID5A	11.6419	14.5684	12.1113	14.4724	10.8818	11.2352	13.7524	15.881	18.7927	18.6733	21.5875	14.6996
ARID5B	349.394	354.158	349.843	292.745	317.1	300.786	151.75	148.272	152.552	315.579	309.511	293.801
ARIH1	126.691	125.725	115.576	124.939	133.636	130.046	119.978	124.08	125.8	134.787	132.494	132.105
ARIH2	89.848	87.7018	77.5121	83.5368	80.9455	85.3701	82.9885	82.225	75.8339	109.154	108.477	117.979
ARIH2OS	0.136963	0.145684	0.346036	0	0.572728	0.0884665	0.47422	0.14842	0	0.169757	0	0
ARL1	232.564	233.24	261.257	217.452	212.482	217.008	239.481	250.831	236.788	171.624	159.478	147.76
ARL10	8.90263	12.5288	8.30487	10.8085	12.7909	11.766	7.58752	9.20207	5.74834	13.9201	15.1113	12.0269
ARL13A	0	0.291368	0	0.183195	0.190909	0	0.94844	0.445261	0	0	0	0
ARL13B	33.1452	37.1494	36.6799	20.5178	20.0455	24.3283	15.6493	21.2241	15.2552	30.3865	33.7305	31.4991
ARL14	0	0.145684	0	0	0	0	0	0	0	0	0.539688	0.763615
ARL14EP	50.5395	55.0686	61.9405	37.9213	40.2818	39.1022	29.8758	35.1757	39.7962	37.0071	33.7305	28.6356
ARL14EPL	0	0	0	0.366389	0	0	0	0.14842	0	0.339514	0.269844	0
ARL15	19.0379	20.3958	16.9558	13.9228	17.7546	16.9856	17.0719	17.662	18.3505	13.9201	11.6033	13.936
ARL16	18.2161	22.8724	19.378	17.4035	15.2727	16.8971	15.175	16.9199	17.9083	20.2011	18.8891	19.4722
ARL17A	1.5066	1.16547	1.03811	1.83195	1.33636	1.23853	0	1.18736	1.10545	1.35806	0.539688	2.09994
ARL2	14.929	16.3166	16.9558	11.5413	8.78182	11.6776	13.2782	11.1315	11.0545	14.2596	12.143	12.9815
ARL2BP	131.622	128.348	130.456	128.786	120.082	123.322	103.854	87.7165	86.8884	88.9527	79.0644	79.2251
ARL3	33.83	35.8383	39.4481	31.8759	30.9273	32.998	41.2571	43.3388	38.9119	59.0755	62.8737	65.6709
ARL4A	3.28712	4.07915	2.76829	1.64875	1.14546	2.83093	3.79376	2.81999	2.65308	1.52781	3.23813	3.24536
ARL4C	21.2293	19.0846	22.1463	27.1128	31.1182	27.8669	63.0712	62.6334	63.4529	76.0512	70.1595	83.9977
ARL4D	15.4769	12.0918	14.1875	3.2975	2.67273	2.21166	4.26798	4.89788	4.64289	2.88587	5.39688	3.62717
ARL5A	109.16	114.071	121.805	137.579	146.427	143.758	129.936	133.43	109.661	123.244	141.129	123.897
ARL5B	72.8646	72.842	87.2012	120.176	123.9	130.223	181.152	214.913	215.121	217.289	221.542	215.912
ARL6	21.7772	20.2501	23.1844	21.2506	23.8636	22.7359	23.2368	28.3483	25.6465	31.5748	22.9368	26.5356
ARL6IP1	170.246	178.463	171.98	128.236	125.427	122.172	119.503	118.736	122.484	70.7887	67.4611	72.5434
ARL6IP4	39.1716	43.2681	37.3719	30.2271	22.5273	28.3093	29.8758	25.0831	31.3948	34.8002	37.7782	42.7625
ARL6IP5	262.011	263.251	277.867	174.768	169.718	180.737	298.758	307.973	300.462	162.458	160.018	172.195
ARL6IP6	58.8943	67.0146	70.5914	39.0205	40.2818	42.9062	38.886	38.2925	34.269	24.2753	28.0638	22.7176
ARL8A	13.8333	11.6547	10.3811	16.6707	15.6546	16.7202	18.9688	18.4041	16.8029	10.1854	12.6827	8.39977
ARL8B	171.478	175.549	151.564	274.242	292.282	290.524	306.82	322.518	301.567	339.514	313.829	339.045
ARLNC1	0	0.145684	0	0.183195	0.190909	0	0.47422	0.296841	0	0.339514	0.539688	0.954519
ARMC1	84.0956	87.9931	91.3536	64.8509	69.8728	61.9265	74.4525	64.5629	70.3067	69.7702	64.4928	73.6889
ARMC10	2.73927	2.33094	2.42225	5.49584	6.87273	4.15792	6.16486	6.38208	9.28579	8.65761	7.55564	7.82706
ARMC12	0.136963	0.145684	0.346036	0	0	0	0	0	0.22109	0	0.539688	0.572711
ARMC2	2.32838	2.03958	3.11433	0.732779	0.954546	2.1232	2.3711	1.78105	1.76872	1.86733	2.15875	3.43627
ARMC4	19.3118	19.813	16.6097	1.46556	1.33636	1.5924	0.47422	2.22631	0.884361	1.1883	0.809533	1.71813
ARMC5	7.1221	8.44967	8.99694	8.79335	7.25455	6.63498	6.63908	7.56945	9.50688	9.33664	10.7938	8.78158
ARMC6	19.9967	23.0181	20.0701	19.9682	23.6727	22.1166	17.5461	16.9199	19.4559	26.4821	30.2226	29.0174
ARMC7	5.20461	6.70146	5.53658	3.11431	3.81818	3.53866	6.16486	4.60104	4.64289	3.39514	3.77782	4.00898
ARMC8	45.7458	44.2879	48.7911	29.128	34.1727	32.9095	33.1954	35.6209	39.7962	37.3466	31.0321	32.6446
ARMC9	154.358	149.326	134.262	100.94	87.8182	98.1978	128.039	110.87	115.63	127.318	120.081	121.415
ARMCX1	58.0725	58.4193	58.8262	70.1636	67.7728	70.1539	71.6072	66.0471	63.674	76.5605	81.7628	70.6344
ARMCX2	90.3959	90.6154	89.6234	80.7889	77.5091	76.1696	64.9681	61.0008	60.3576	64.6775	66.9214	60.5165
ARMCX3	193.94	190.7	194.472	132.633	135.355	136.061	164.08	165.786	163.386	200.992	182.954	191.667
ARMCX4	31.9125	34.2357	35.6417	25.6473	22.9091	25.4783	26.0821	24.1925	24.541	36.328	39.6671	38.3717
ARMCX5	10.6832	11.3634	14.1875	8.42696	10.8818	9.64284	8.53596	9.79575	7.07488	12.7318	8.36517	11.6451
ARMCX5-GPRASP2	2.46534	1.16547	3.11433	1.64875	1.33636	1.50393	0.94844	1.63263	1.32654	1.52781	1.34922	1.52723
ARMCX6	4.79372	4.80757	4.49847	3.4807	5.91818	4.60026	5.69064	4.89788	2.65308	3.05563	5.12704	2.09994
ARMH1	0.821781	0.291368	1.03811	0	0	0	0	0	0	0	0.269844	0
ARMH3	27.5297	25.6404	20.7622	28.7616	31.5	30.9633	36.5149	28.7936	22.109	28.0099	26.1749	29.2083
ARMH4	1.64356	3.05936	2.07622	2.56473	2.48182	2.1232	1.89688	3.71051	3.75853	2.03709	4.04766	3.24536
ARMT1	104.229	100.668	121.459	143.258	136.882	146.5	122.823	134.766	134.202	149.217	143.287	133.251
ARNT	50.4026	46.6189	45.3308	50.0122	48.1091	50.9567	56.4322	56.3998	51.2929	73.1653	64.7626	74.2616
ARNT2	46.0197	48.8041	48.7911	24.5481	25.2	30.2555	23.711	23.4504	22.3301	24.1055	23.4764	28.4447
ARNTL	14.929	15.4425	14.8796	19.9682	16.8	17.074	18.4946	21.3726	21.4457	32.4236	30.2226	28.2538
ARNTL2	76.9735	87.9931	88.9313	153.517	163.609	153.047	141.317	151.983	140.171	114.247	107.398	104.424
ARNTL2-AS1	0	0.291368	0.692073	0.915974	0.381818	0.0884665	0	0.14842	0	0.339514	0.269844	0.190904
ARPC1A	91.2177	100.231	91.6996	126.038	133.064	134.292	190.636	201.407	189.695	166.871	183.224	160.359
ARPC1B	143.127	158.65	158.139	255.007	244.173	249.033	270.305	224.115	250.053	181.301	205.351	196.058
ARPC2	523.2	506.398	469.571	441.316	430.309	443.925	381.273	439.622	451.466	412.68	419.338	445.188
ARPC3	140.935	149.909	150.18	144.357	137.455	142.431	131.833	135.063	123.589	147.519	150.573	133.824
ARPC4	127.102	134.903	138.761	109.917	106.145	111.379	103.38	100.629	112.314	117.302	130.065	135.733
ARPC5	520.598	536.7	527.359	477.589	475.364	507.797	498.879	535.056	515.361	371.938	385.877	356.608
ARPC5L	39.8564	46.7646	36.6799	75.4762	79.6091	76.435	71.133	72.726	70.7488	105.249	115.763	112.251
ARPIN	22.599	26.0774	27.6829	11.5413	7.63637	9.46591	8.53596	7.86629	8.40143	5.60199	6.47626	6.49073
ARPP19	298.58	298.507	319.045	318.392	314.427	311.667	282.635	310.941	296.482	309.637	272.543	273.756
ARR3	0.41089	0.145684	0.346036	0.549584	0	0	0.47422	0	0	0	0	0
ARRB1	7.1221	7.57557	8.30487	16.1211	21.9546	15.3932	18.0204	20.6304	26.0886	15.9572	16.1907	15.2723
ARRB2	2.19142	3.6421	2.07622	2.38153	1.90909	2.1232	4.26798	1.78105	1.54763	4.7532	2.96829	4.7726
ARRDC1	10.4092	8.59536	10.7271	10.9917	9.16364	9.02358	12.3297	12.0221	13.9287	8.82737	14.3017	14.1269
ARRDC1-AS1	2.05445	3.35073	2.07622	1.83195	0.954546	1.41546	1.42266	0.890523	2.43199	2.3766	1.88891	3.81808
ARRDC2	6.84817	8.74104	8.99694	9.52612	8.59091	7.69658	7.58752	6.82734	9.94906	7.46931	9.44455	9.927
ARRDC3	41.9108	41.0829	43.2545	16.3043	20.6182	18.6664	35.0923	44.0809	36.4799	34.6305	41.0163	39.3262
ARRDC3-AS1	0.547854	0.874104	0	0.366389	0.572728	0.176933	0	0.445261	0.22109	0.679029	0	0.572711
ARRDC4	79.7127	85.2251	94.814	85.3687	90.6819	91.9167	69.7103	74.5071	76.7183	242.922	241.511	240.539
ARSA	21.9142	23.3094	23.5305	12.4572	12.4091	12.3853	16.5977	16.4747	19.0138	11.0342	8.36517	9.73609
ARSB	51.9092	57.1081	55.3658	67.5988	72.3546	65.1998	112.864	109.683	94.8477	81.9927	78.2548	75.7888
ARSD	10.4092	11.6547	12.1113	5.31265	5.72728	4.60026	6.63908	6.67892	6.6327	7.80883	6.47626	6.87254
ARSE	1.78053	1.31116	1.73018	0.366389	1.52727	0.973131	0.94844	0.445261	0.44218	0.169757	0	0.190904
ARSG	6.30032	6.26441	6.22865	18.8691	19.0909	20.2588	31.7727	27.161	23.2145	10.3552	11.3335	9.54519
ARSI	2.73927	2.768	1.38415	3.84709	3.05455	4.42332	5.69064	3.85893	4.64289	9.33664	12.143	9.927
ARSJ	95.8744	95.5687	109.347	96.1772	94.1182	94.6591	108.596	105.082	104.797	111.191	103.62	109.388
ARSK	45.7458	49.5326	49.8292	29.6775	35.3182	30.6094	37.4634	41.7062	37.5853	24.7845	27.794	21.3812
ART3	0.136963	0	0	0	0.190909	0.619265	0	0.14842	0	0	0	0
ART4	0.273927	0.582736	0	0.183195	0	0	0	0.14842	0.22109	0	0.269844	0
ARTN	0.273927	0.145684	0.346036	0	0	0.0884665	0.47422	0.445261	0.66327	0.169757	0.269844	0.190904
ARV1	25.2013	26.3688	28.721	15.7547	16.6091	15.4816	21.3399	20.482	16.5818	20.8801	25.905	21.5721
ARVCF	2.19142	4.22484	2.42225	0.915974	1.52727	1.50393	1.89688	4.15577	3.97962	1.52781	3.23813	3.81808
AS-PTPRE	0	0	0	0.366389	0	0.265399	0.47422	0.14842	0	0.339514	0.269844	0
ASAH1	64.5098	71.9679	71.2835	45.2491	43.5273	43.7909	98.6377	87.5681	74.9496	47.532	41.556	40.6625
ASAH2	0.273927	0.72842	0.346036	0	0.381818	0.353866	0	0.445261	0.44218	0.848786	0.809533	0.763615
ASAH2B	6.43728	4.07915	4.15244	3.66389	2.86364	3.09633	4.7422	2.81999	2.87417	5.09271	5.66673	7.82706
ASAP1	466.635	426.271	420.78	320.408	326.455	323.61	196.327	211.944	212.468	346.814	345.401	372.072
ASAP1-IT2	0.41089	0.874104	0.346036	0.549584	0.190909	0.619265	0	0.593682	0.44218	0	0	0.190904
ASAP2	119.98	121.209	136.338	150.769	147.764	153.489	124.246	111.464	114.967	140.559	127.097	118.551
ASAP3	11.7789	11.6547	10.3811	3.66389	2.29091	4.24639	4.7422	5.49156	6.41161	2.54636	3.77782	5.34531
ASB1	68.0708	77.2125	70.9374	161.761	156.546	155.701	170.719	169.496	174.219	290.624	272.273	280.438
ASB13	3.83498	5.09894	3.46036	4.57987	1.71818	3.36173	3.31954	4.30419	3.97962	5.09271	7.28579	5.72711
ASB14	0.958744	0.582736	1.03811	1.09917	0.572728	0.265399	0.47422	0.890523	0.884361	2.71611	2.96829	3.81808
ASB16	0.547854	1.60252	0.692073	0.366389	0.190909	0.530799	1.42266	0.445261	1.10545	0	0.269844	0.381808
ASB16-AS1	4.38283	6.11873	3.11433	4.94626	3.43637	5.57339	6.16486	5.63998	9.0647	6.62053	5.12704	5.34531
ASB3	7.53299	5.82736	10.0351	8.79335	8.4	9.02358	7.1133	12.0221	9.94906	17.3152	19.1589	15.4632
ASB5	0.136963	0.145684	1.03811	0	0.190909	0.0884665	0	0.14842	0.22109	0	0	0
ASB6	25.7491	26.3688	23.8765	26.7464	25.3909	26.0976	23.2368	21.521	26.0886	22.0684	24.0161	21.9539
ASB7	36.4323	30.0109	30.7972	32.4255	33.9818	28.0439	31.7727	25.0831	27.1941	36.6675	32.921	29.5901
ASB8	37.391	37.1494	36.6799	24.9145	20.8091	22.7359	28.4532	24.0441	21.2247	21.3894	27.794	23.0994
ASB9P1	0.136963	0.291368	0	0.366389	0	0.0884665	0	0.296841	0	0.339514	0	0
ASCC1	22.0511	23.1638	16.9558	18.3195	17.7546	18.578	14.7008	12.6157	12.6021	7.97859	6.47626	6.87254
ASCC2	39.3085	36.7124	42.2164	24.7313	31.6909	26.6284	39.8345	33.543	28.0784	34.6305	38.048	33.5991
ASCC3	504.847	484.691	485.489	247.496	248.564	251.864	199.172	220.553	208.93	200.992	189.431	184.413
ASF1A	35.7475	35.5469	31.8353	29.3112	36.0818	32.5557	18.0204	27.4578	27.1941	37.6861	42.0957	36.6535
ASF1B	6.02639	9.17809	8.65091	2.74792	2.1	2.47706	0.47422	0.296841	0.884361	0.848786	0.269844	0.381808
ASGR1	0.136963	0.291368	0.346036	0.732779	0.954546	0.707732	0.94844	0.296841	0.44218	1.35806	0.539688	0.954519
ASH1L	183.257	173.364	159.869	166.341	169.146	161.805	138.946	146.046	142.161	197.937	185.383	183.268
ASH1L-AS1	0.958744	0.874104	0.692073	0.549584	0.572728	0.707732	0	0.890523	0.884361	1.1883	0.809533	1.33633
ASH2L	34.3778	35.2555	33.9116	19.785	24.4364	24.5937	21.3399	23.8957	24.0988	17.8245	19.6986	17.945
ASIC1	1.91749	1.31116	2.76829	1.09917	1.52727	1.41546	0.94844	2.22631	3.31635	0.848786	1.07938	1.71813
ASIC2	0.41089	0	0.346036	0	0	0	0	0.14842	0	0.169757	0.269844	0.190904
ASIC3	0.273927	0.291368	0.692073	0.915974	0.763637	0.796198	0	0.445261	0.44218	2.03709	1.07938	1.14542
ASL	19.4488	19.5217	23.1844	20.5178	19.8546	18.8434	13.7524	10.9831	12.6021	11.3737	10.2541	10.4997
ASNA1	36.9801	36.1296	40.1402	37.7381	38.7546	38.8368	39.8345	40.9641	35.1533	52.6247	51.8101	53.644
ASNS	1.09571	0.874104	0	0.366389	1.14546	0.442332	0	0.296841	0.44218	1.35806	0.269844	0.763615
ASNSD1	56.7029	56.6711	57.096	43.234	47.1546	48.922	42.6798	45.5651	51.0718	56.6989	52.0799	55.9348
ASPA	0.136963	0	0	0.183195	0	0.0884665	0	0.14842	0	0.339514	0	0.190904
ASPH	1473.73	1454.95	1527.06	1156.32	1176.38	1201.91	1227.28	1243.76	1209.14	1121.08	1090.71	1056.08
ASPHD1	6.02639	4.37052	3.46036	9.89251	10.3091	9.20051	17.0719	10.8347	13.0443	12.7318	17.27	19.2813
ASPHD2	1.64356	1.01979	0.692073	2.56473	0.954546	1.0616	1.42266	1.78105	1.76872	1.52781	1.61907	1.71813
ASPM	172.3	173.073	191.012	40.3028	37.0364	45.0294	3.79376	3.71051	4.4218	2.03709	2.69844	2.86356
ASPN	10.2723	13.84	10.3811	3.11431	1.33636	2.47706	1.42266	1.03894	1.32654	1.01854	0.269844	0.763615
ASPSCR1	6.98514	8.74104	10.3811	8.61015	6.49091	6.36959	7.1133	6.5305	8.18034	10.3552	9.98424	11.4542
ASS1	30.132	31.1764	29.4131	66.3165	58.8	64.4036	66.865	52.3924	49.082	27.1611	28.3336	27.872
ASTE1	7.25906	7.2842	6.22865	5.67904	4.00909	4.95412	3.31954	3.85893	3.75853	5.77174	4.8572	5.34531
ASTN2	2.73927	3.78778	2.76829	1.46556	1.14546	0.884665	1.89688	2.52315	3.09526	3.05563	2.96829	3.24536
ASXL1	77.6583	79.2521	71.9756	66.6829	66.8182	66.0844	58.329	53.4314	65.0005	47.7018	43.4449	47.3441
ASXL2	103.544	100.959	100.004	172.203	185.373	177.906	152.225	168.903	162.059	227.135	223.971	231.375
ATAD1	102.723	101.979	108.309	83.1704	92.2091	92.359	81.0916	91.1302	84.2353	90.9898	90.128	88.1976
ATAD2	96.0114	101.833	114.538	67.5988	64.7182	67.4999	37.9376	37.6988	34.9322	62.1311	62.334	60.8983
ATAD2B	22.462	20.9785	24.9146	16.8539	19.0909	16.2778	15.6493	12.4673	17.0239	20.5406	23.2066	17.1813
ATAD3A	17.5313	20.9785	18.3399	14.6556	14.1273	16.0124	10.4328	10.6863	15.4763	13.4108	16.1907	15.0814
ATAD3B	15.8878	18.3562	18.3399	17.5867	16.4182	14.42	16.5977	12.9126	17.4661	12.0528	14.3017	14.3178
ATAD3C	0	0	0.346036	0	0.381818	0	0.47422	0.296841	0	0.169757	0	0.763615
ATAD5	15.3399	16.0252	18.686	7.32779	7.44546	6.36959	6.63908	6.23366	5.74834	4.92296	5.39688	5.72711
ATE1	59.4421	56.234	50.8673	73.6443	81.1364	81.9199	72.0814	81.3344	67.8747	96.5918	92.5566	86.4794
ATE1-AS1	0.958744	0.874104	0.346036	0.549584	0.381818	0.707732	0.47422	0.296841	0.44218	0.679029	0.809533	0.190904
ATF1	61.6336	63.6639	70.2454	61.7366	62.2364	69.4462	56.9064	61.4461	57.2623	57.3779	58.2863	63.571
ATF2	117.515	112.468	121.459	115.962	120.082	118.28	113.813	103.894	102.144	103.043	94.4455	102.134
ATF3	1.5066	2.62231	1.73018	4.39667	5.72728	3.80406	1.89688	1.78105	3.09526	65.5263	74.2072	78.0797
ATF4	84.0956	91.7809	75.0899	73.8275	81.1364	84.9278	67.3392	62.0398	76.055	112.209	124.128	134.587
ATF5	18.3531	20.9785	20.0701	19.6018	14.5091	14.6854	18.0204	16.9199	18.1294	8.82737	10.7938	14.6996
ATF6	110.256	111.74	120.421	73.6443	62.6182	76.1696	50.7415	54.9156	44.218	91.8386	96.6042	91.8247
ATF6B	0.136963	0	0.346036	0.366389	0.190909	0	0.94844	0	0.22109	0.339514	0	0
ATF7	34.1039	30.0109	30.7972	34.2574	35.7	35.5635	43.154	39.3314	34.7112	42.9486	33.1908	38.1808
ATF7IP	88.4784	87.2647	83.3948	77.125	69.3	66.8806	77.772	71.8355	61.9052	90.8201	87.4295	85.9067
ATF7IP2	1.36963	1.31116	2.07622	0.549584	0.572728	0.973131	1.42266	0.742102	1.32654	1.69757	1.34922	0.763615
ATG10	3.83498	3.78778	3.8064	2.01514	1.33636	2.83093	3.31954	1.92947	4.86398	2.3766	1.88891	2.09994
ATG101	21.9142	23.4551	21.1082	32.975	31.5	26.8053	31.2985	29.0904	33.1635	44.1369	45.6037	51.1622
ATG12	115.871	115.382	132.186	142.159	154.636	147.916	154.596	165.192	162.943	186.563	184.573	183.459
ATG13	82.8629	84.0597	69.5533	107.352	108.818	105.187	90.1018	82.225	93.5211	131.562	124.398	126.569
ATG14	46.0197	49.6782	42.5625	46.7147	46.7727	52.9914	43.6282	48.6819	48.4187	61.6218	65.5721	62.4255
ATG16L1	26.16	26.0774	24.9146	29.128	32.2637	28.8401	39.3602	36.363	33.3846	47.532	50.4609	47.9169
ATG16L2	4.1089	5.68168	5.53658	6.22862	6.68182	5.04259	6.16486	7.71787	10.3912	4.7532	3.23813	4.39079
ATG2A	21.7772	19.5217	24.5686	47.2642	49.2546	45.8256	57.3806	54.7672	57.0413	77.4093	86.0803	74.4525
ATG2B	98.0658	95.5687	101.735	115.596	112.255	111.379	118.555	119.924	116.515	144.124	147.605	142.987
ATG3	65.0576	64.9751	69.2073	61.0038	55.5546	63.9613	54.5353	60.2587	51.9562	81.8229	87.6994	84.1886
ATG4A	22.462	21.7069	19.7241	16.1211	13.3636	14.6854	14.2266	13.5063	15.2552	14.7689	15.651	18.1359
ATG4B	34.7887	36.8581	37.3719	35.9062	38.9455	34.6789	49.7931	37.6988	40.9017	44.4764	45.6037	43.1443
ATG4C	12.1897	15.4425	14.8796	12.4572	11.8364	12.4738	11.8555	11.4284	14.3709	10.0157	11.0636	9.16338
ATG4D	4.24587	3.93347	4.84451	3.66389	3.43637	3.71559	6.63908	3.56209	5.08507	5.09271	5.66673	4.7726
ATG5	63.825	60.1675	57.096	56.2408	50.9727	54.4069	63.0712	62.3366	54.1671	59.9243	68.8103	60.3256
ATG7	33.556	26.0774	25.2607	65.5837	65.4818	60.9534	59.2775	52.0956	55.2725	43.6276	38.8576	41.0443
ATG9A	57.6616	59.1477	53.9817	52.3937	49.0637	46.091	61.6486	48.9788	59.4732	58.2267	55.0482	54.4076
ATG9B	0.273927	0.437052	0	0.183195	0	0.0884665	0	0.14842	0.22109	0.339514	1.07938	0
ATIC	76.0147	76.4841	76.8201	83.1704	84.5728	87.5818	59.2775	68.7187	76.2761	81.6532	84.4612	81.325
ATL1	20.8184	22.581	24.9146	37.3717	44.2909	40.96	46.4735	42.5967	39.133	31.4051	36.6988	31.3082
ATL2	53.0049	43.9966	52.9436	51.4777	50.9727	57.8571	45.0509	59.8135	58.5889	52.6247	45.3338	49.635
ATL3	352.407	340.318	369.913	299.523	292.282	286.101	384.592	391.236	342.911	335.27	337.305	303.155
ATM	217.498	217.215	235.651	281.57	267.846	284.597	318.201	312.722	310.632	328.141	295.479	292.083
ATMIN	97.381	91.6352	91.6996	96.1772	100.991	97.1362	86.308	85.9355	86.2252	73.8444	75.2865	70.0617
ATN1	120.117	121.938	119.036	104.238	109.009	91.8282	99.5861	81.0376	85.1197	80.6346	81.7628	87.0521
ATOH8	11.9158	9.61514	6.22865	1.09917	0.190909	0.265399	1.89688	0.14842	0	0.339514	0.809533	0
ATOX1	41.226	37.4408	37.718	36.8221	41.6182	35.3866	39.8345	41.4093	41.1228	41.251	39.3973	46.0078
ATP10A	21.5033	21.2699	20.4161	1.28236	1.90909	1.94626	0.94844	1.63263	0.44218	1.01854	0.269844	1.33633
ATP10D	184.216	177.589	166.79	62.6526	65.4818	60.7765	82.9885	93.2081	77.1605	84.5391	80.4136	77.1251
ATP11A	22.1881	23.8922	30.1052	27.8456	28.4455	24.4167	34.618	38.7377	39.133	28.0099	29.1432	24.8175
ATP11B	154.906	151.511	166.097	185.21	174.109	193.388	175.936	199.922	184.831	171.285	165.684	156.732
ATP11C	130.252	121.792	130.456	99.2915	103.282	95.9861	81.5658	86.2323	91.7524	52.455	53.699	46.9623
ATP13A1	42.0478	47.3473	46.0228	45.4323	38.3727	35.9174	35.0923	38.4409	45.9867	34.4607	36.1591	33.9809
ATP13A2	17.2574	20.2501	21.1082	19.6018	18.3273	16.0124	31.7727	22.5599	32.0581	27.1611	37.2385	33.9809
ATP13A3	741.794	711.958	750.207	1992.98	2077.47	2026.86	1550.7	1605.32	1538.79	2320.41	2337.39	2200.93
ATP1A1	208.048	189.535	177.171	242.55	239.209	223.82	245.172	238.809	239.441	174.51	153.272	180.595
ATP1A1-AS1	0.684817	1.45684	1.38415	0.366389	0.190909	0.0884665	0	0.742102	0.66327	0.169757	0.539688	0.381808
ATP1B1	21.7772	22.8724	21.8003	7.69418	7.82728	8.58125	12.3297	9.94417	9.72797	12.0528	8.90486	8.97248
ATP1B2	0	0.145684	0	0.183195	0.190909	0.176933	0	0.14842	0.22109	0.169757	0	0
ATP1B3	260.368	270.244	262.642	335.43	316.909	312.817	349.5	336.618	355.513	218.138	206.431	210.567
ATP2A1	0.684817	0.582736	0.692073	0.366389	0.763637	0.619265	0.47422	0.296841	0.884361	0.169757	0.539688	0.572711
ATP2A1-AS1	0.273927	0.291368	0	0.366389	0	0.0884665	0.47422	0	0	0.339514	0.269844	0.572711
ATP2A2	728.235	688.94	667.85	785.173	836.373	789.209	613.166	618.913	617.505	557.822	528.355	545.221
ATP2A3	0.821781	0.582736	1.03811	10.8085	7.25455	8.40431	33.6696	27.9031	38.2486	78.5976	78.7945	84.3795
ATP2B1	462.252	423.795	437.39	862.847	863.673	890.15	812.813	819.726	785.975	725.372	738.024	712.262
ATP2B1-AS1	6.02639	4.95326	3.46036	8.42696	6.87273	7.16578	4.7422	8.31155	7.73815	6.28101	10.2541	7.25434
ATP2B2	0	0	0	0.366389	0	0.176933	0	0	0	0.509271	0	0.190904
ATP2B4	1483.31	1419.69	1393.83	836.101	852.409	807.433	715.123	732.9	727.387	502.99	466.291	481.65
ATP2C1	395.14	386.791	385.484	309.782	317.1	314.675	272.202	286.303	260.444	153.291	141.129	140.505
ATP2C2	1.64356	1.16547	1.73018	1.28236	0.190909	0.619265	1.42266	1.18736	0.66327	2.54636	3.77782	1.71813
ATP2C2-AS1	0.958744	1.74821	1.38415	0.366389	1.33636	0.973131	0.94844	0.742102	0.884361	1.35806	1.61907	2.48175
ATP5F1A	377.745	384.751	384.1	326.087	325.309	322.903	312.985	317.62	299.798	340.703	339.734	336.182
ATP5F1B	380.621	388.831	364.722	383.06	372.846	373.152	359.933	359.326	356.618	343.928	333.258	347.827
ATP5F1C	154.084	158.796	136.684	132.267	127.718	127.746	101.483	110.87	109.882	165.004	164.875	153.296
ATP5F1D	20.4076	24.0379	29.0671	21.8002	19.2818	19.0203	20.8657	17.662	20.1192	19.1826	23.4764	21.1903
ATP5F1E	24.2425	27.3886	26.6448	25.4641	27.1091	26.7169	31.7727	29.8325	27.4152	40.4022	42.0957	35.5081
ATP5IF1	79.7127	79.1064	94.4679	51.6609	60.5182	64.3151	68.7619	64.8598	69.2012	77.579	95.255	95.261
ATP5MC1	28.6254	27.8256	22.8384	17.7699	19.6636	17.6048	20.8657	18.9978	21.6668	30.3865	28.6035	34.5536
ATP5MC2	67.523	72.842	62.2865	49.2794	54.7909	51.8413	40.3087	44.2293	45.7657	81.3137	66.6515	89.5339
ATP5MC3	191.749	200.753	202.431	189.973	193.2	187.46	205.337	203.188	192.57	212.536	230.717	221.639
ATP5MD	76.6995	90.9068	73.3597	80.0561	80.7546	83.8662	72.0814	79.2565	80.0346	106.438	102.001	122.369
ATP5ME	39.3085	38.7519	29.4131	33.5246	29.0182	35.5635	46.9478	44.0809	42.2282	40.2324	34.8099	41.9988
ATP5MF	45.7458	46.4732	38.41	38.4709	33.7909	35.5635	38.886	34.7304	36.9221	30.8958	36.6988	37.4171
ATP5MG	95.7375	107.078	85.817	99.4747	89.3455	93.5975	116.184	108.05	110.987	153.121	169.732	162.841
ATP5MGL	1.23267	1.74821	2.07622	1.09917	1.52727	1.327	0.47422	1.63263	1.32654	2.54636	2.15875	1.90904
ATP5MPL	51.3613	54.1944	50.5213	42.318	47.5364	47.7719	46.4735	54.0251	49.9664	59.9243	58.5562	58.2257
ATP5PB	116.556	123.686	109.694	92.1469	91.2546	99.2594	80.6174	83.7092	92.1946	113.398	107.938	113.97
ATP5PD	77.1104	76.1927	73.3597	75.4762	66.6273	81.0353	82.5142	88.9039	83.7932	80.9742	88.5089	92.7793
ATP5PF	96.8332	101.25	96.8902	90.315	90.3	91.1205	94.844	93.2081	93.3	110.851	125.208	119.697
ATP5PO	74.2342	74.8816	68.5152	58.8055	66.4364	68.7384	61.6486	59.5166	68.3169	70.1097	63.6832	72.1616
ATP5S	8.21781	9.90651	11.7652	6.04543	6.3	7.07732	8.06174	4.45261	4.86398	5.09271	7.55564	5.53621
ATP6AP1	85.8761	88.4302	76.128	85.5519	80.9455	78.3813	116.184	102.41	99.4906	93.7059	85.2708	98.3155
ATP6AP1L	2.05445	1.89389	0.346036	0.183195	0.954546	0.707732	1.42266	0.593682	0.44218	0.848786	0.809533	1.90904
ATP6AP2	228.455	236.299	235.651	275.158	273.955	284.862	333.851	358.287	335.173	264.991	251.495	246.457
ATP6V0A1	35.8844	33.653	38.064	62.2862	65.1	71.8348	91.5244	89.646	92.6368	126.13	119.001	117.406
ATP6V0A2	32.4603	35.4012	37.3719	45.4323	36.2727	41.3138	35.5665	41.2609	35.5955	51.4364	37.2385	44.6715
ATP6V0B	62.3184	63.2269	75.782	123.656	117.409	104.037	146.06	131.204	133.76	147.179	175.669	155.396
ATP6V0C	144.086	135.632	148.796	191.622	185.755	163.928	221.935	214.616	228.386	217.629	240.701	235.766
ATP6V0CP3	0.273927	0.145684	0.346036	0	0.381818	0.176933	0	0	0.22109	0.339514	0	0
ATP6V0D1	75.3299	79.1064	73.7057	112.482	110.346	106.071	138.946	126.9	118.725	111.021	117.922	122.751
ATP6V0D2	0	0	0	0.183195	0.381818	0.176933	0	0	0.22109	0	0.539688	0.381808
ATP6V0E1	240.234	231.346	217.657	275.158	240.355	244.61	237.11	226.193	224.849	221.363	207.78	226.603
ATP6V0E2	7.25906	9.32378	9.68902	1.28236	3.24546	2.30013	0.94844	2.96841	1.54763	4.07417	3.77782	3.05446
ATP6V0E2-AS1	0.821781	0.72842	0.346036	0.183195	0	0.0884665	0	0.296841	0.22109	0.339514	0	0.763615
ATP6V1A	192.16	177.297	186.514	169.821	175.446	157.205	204.389	192.205	200.087	229.342	229.907	217.439
ATP6V1B1	0.41089	0.291368	0.346036	0	0.190909	0.265399	0.47422	0.593682	0.44218	0.169757	0.269844	0.572711
ATP6V1B1-AS1	0.273927	0	0	0.549584	0.190909	0.176933	0	0.593682	0	0	0	0.190904
ATP6V1B2	66.2903	67.306	55.7118	101.123	109.391	106.248	144.163	147.678	145.256	176.717	176.478	161.696
ATP6V1C1	126.554	121.5	123.535	288.165	274.909	300.786	302.078	303.668	277.689	239.018	225.59	210.758
ATP6V1C2	0.958744	0.874104	1.03811	1.64875	1.71818	1.68086	1.42266	1.18736	1.10545	2.03709	1.07938	1.52723
ATP6V1D	125.185	126.162	116.96	135.564	140.127	145.35	143.689	159.107	157.637	205.406	207.24	209.04
ATP6V1E1	69.9883	77.6496	79.9344	129.885	124.473	122.703	144.637	140.406	145.919	177.736	168.383	184.986
ATP6V1E2	2.73927	1.89389	1.73018	2.56473	2.29091	2.21166	2.3711	1.63263	2.43199	1.86733	1.61907	1.71813
ATP6V1F	51.0874	53.466	43.6006	90.4982	75.0273	80.0621	109.071	107.456	116.515	120.188	125.208	128.86
ATP6V1FNB	0.41089	0.145684	0	0.549584	0.381818	0.530799	1.89688	0.296841	1.54763	1.35806	2.96829	1.52723
ATP6V1G1	125.459	129.513	137.722	248.595	237.491	239.567	292.594	316.878	298.914	318.804	347.559	323.2
ATP6V1H	91.2177	96.2971	87.2012	133.366	128.864	131.107	132.782	127.642	128.453	160.081	165.414	156.923
ATP7A	58.7573	55.797	60.9024	87.0175	95.6455	90.8551	110.019	106.566	96.6164	153.121	157.859	144.514
ATP7B	4.24587	4.22484	4.84451	2.19834	3.43637	2.47706	2.3711	2.67157	1.76872	1.69757	2.4286	2.48175
ATP8A1	0.958744	0.72842	0.692073	1.09917	0.190909	0.973131	2.3711	2.67157	2.65308	2.03709	0.809533	0.763615
ATP8B1	380.074	392.327	428.047	45.0659	41.0455	40.6061	12.8039	14.3968	13.0443	13.5806	14.5716	14.3178
ATP8B2	164.767	170.159	182.361	138.495	147.955	142.608	180.678	176.472	186.6	159.741	152.192	155.587
ATP8B3	1.78053	1.60252	2.76829	1.09917	0.381818	0.707732	0	0.593682	0.66327	1.35806	0.539688	0.572711
ATP8B4	0.821781	0.291368	0.692073	0.183195	0.190909	0.442332	0.47422	0.14842	0.66327	0.339514	1.34922	0.190904
ATP8B5P	1.36963	1.60252	2.42225	0.915974	2.48182	2.38859	1.42266	1.78105	0.884361	2.20684	1.34922	3.81808
ATP9A	66.2903	72.6963	67.8231	52.3937	54.9818	55.6454	68.7619	52.8377	54.6093	56.0199	60.4451	62.8074
ATP9B	10.9571	11.3634	11.4192	9.89251	10.1182	9.46591	14.2266	7.2726	9.50688	10.1854	10.7938	9.16338
ATPAF1	41.7739	43.4138	36.6799	20.1514	26.9182	23.4436	24.6594	15.7326	21.4457	27.6704	29.1432	31.8809
ATPAF2	7.25906	9.32378	8.99694	9.70932	7.06364	8.05045	12.8039	9.20207	11.4967	7.46931	7.82548	8.97248
ATR	90.9437	89.1586	98.2743	73.2779	90.1091	91.6513	71.6072	68.8671	64.3372	56.5291	47.4926	49.0623
ATRAID	57.9355	58.1279	60.2103	41.402	40.2818	44.6756	37.4634	40.222	37.1431	43.1183	50.4609	46.7714
ATRN	125.459	128.785	130.11	128.603	127.718	128.896	136.101	116.659	110.766	116.623	111.985	107.861
ATRNL1	0.41089	0.145684	0.346036	0	0	0	0	0.14842	0.22109	0	0	0
ATRX	350.353	349.059	367.145	312.164	306.791	315.118	282.635	281.108	290.955	325.594	330.019	309.455
ATXN1	92.1764	93.0921	93.7758	29.6775	26.9182	34.325	29.8758	33.6915	28.5206	35.8188	34.8099	32.2627
ATXN10	188.188	205.851	189.282	130.435	135.164	132.346	153.173	167.121	151.668	74.5234	70.6992	78.2706
ATXN1L	42.7326	45.0164	42.2164	36.8221	40.8546	31.5825	42.6798	35.3241	29.405	37.8558	39.3973	41.617
ATXN2	106.284	95.5687	88.5853	86.8343	83.0455	84.4855	82.04	75.3976	74.7285	84.8786	90.128	90.4884
ATXN2-AS	0.136963	0	0	0.183195	0	0.265399	0	0	0	0.339514	0.269844	0
ATXN2L	81.2193	75.0273	68.1692	92.3301	98.7	88.378	75.8752	67.6797	82.2455	85.5576	82.5723	84.3795
ATXN3	31.3646	30.885	33.2195	43.6003	43.3364	45.3833	44.5767	49.7209	47.0922	65.696	62.6039	61.2801
ATXN7	50.1286	55.2142	51.9054	45.6155	49.8273	50.1605	53.5868	52.9861	46.65	50.4179	47.2227	44.4806
ATXN7L1	11.368	12.8202	11.7652	5.67904	5.15455	3.45019	3.79376	5.0463	5.08507	5.26247	3.77782	3.43627
ATXN7L2	8.49174	9.46946	5.88262	3.11431	3.24546	3.36173	3.31954	2.67157	3.31635	6.11126	6.74611	7.25434
ATXN7L3	42.7326	47.2016	44.9847	55.3248	59.3728	50.3374	64.4939	54.9156	52.6195	49.3993	42.3655	45.8169
ATXN7L3B	93.82	97.754	97.5822	85.5519	81.5182	82.4507	82.04	83.2639	90.647	88.2737	83.3819	83.6159
AUH	10.6832	11.6547	11.4192	13.7396	10.6909	15.0393	11.3813	11.7252	10.1701	23.2567	21.8574	20.6176
AUNIP	2.32838	2.33094	2.42225	1.64875	0.954546	1.5924	0.47422	0.296841	0	0.509271	0	0.381808
AUP1	44.3762	45.4534	37.3719	48.5466	56.8909	54.4953	50.7415	52.6893	48.6398	72.3165	70.1595	77.316
AURKA	58.7573	67.7431	67.8231	46.5315	44.2909	47.1526	25.6079	18.4041	18.5716	18.5035	21.0478	15.845
AURKAIP1	33.83	36.2753	37.0259	32.2423	33.2182	33.4403	41.2571	36.8083	39.7962	46.0042	49.9212	57.462
AURKAP1	1.91749	0.291368	1.73018	1.83195	1.90909	1.15006	0	1.03894	0.44218	0.848786	1.07938	1.52723
AURKB	9.31352	8.30399	10.3811	1.09917	2.29091	2.21166	0.94844	0.593682	0.66327	0.509271	0.269844	0.763615
AURKC	0.273927	0.437052	0.346036	0	0.763637	0.265399	0.94844	0.445261	0.66327	0.339514	0.269844	0.572711
AUTS2	0	0	0	0.366389	0.381818	0.884665	0.47422	0.445261	1.54763	1.52781	2.15875	2.09994
AVEN	31.0907	31.7591	28.721	22.1666	22.9091	25.036	28.4532	24.341	24.541	17.485	23.2066	19.6631
AVIL	1.64356	1.60252	1.03811	0.732779	0.763637	1.15006	0.94844	0.742102	0.44218	1.1883	0.539688	1.52723
AVL9	78.3431	75.1729	79.9344	116.145	115.118	119.695	124.72	127.938	119.389	197.428	188.351	178.113
AVPI1	9.86137	10.4892	10.7271	7.14459	5.91818	6.90038	6.63908	6.08524	5.96943	9.84591	9.98424	9.927
AXDND1	1.5066	1.16547	0.346036	1.46556	1.52727	1.41546	2.84532	0.890523	1.54763	1.52781	0.539688	0.954519
AXIN1	15.6138	18.9389	13.4954	21.617	19.2818	19.8165	17.5461	19.4431	22.7723	22.9172	26.9844	25.1993
AXIN2	0.684817	1.31116	1.03811	0.915974	0.572728	0.884665	0.47422	1.33578	0.884361	1.1883	1.61907	0.954519
AXL	647.974	671.895	673.733	260.136	252.191	253.899	156.493	158.216	170.682	331.196	327.591	328.927
AZGP1	0	0	0	0	0	0.176933	0	0.14842	0.44218	0	0	0.381808
AZI2	104.366	107.952	112.808	108.085	100.418	111.025	76.8236	71.5387	69.8645	88.104	99.0328	92.7793
AZIN1	335.971	328.954	323.198	152.235	154.255	156.409	114.761	118.885	106.123	135.127	132.763	135.16
AZIN1-AS1	0.136963	0.437052	0.346036	0	0.190909	0.353866	0	0	0.22109	0.169757	0	0.190904
AZIN2	0.958744	1.74821	1.03811	1.46556	1.52727	1.94626	2.84532	0.593682	1.98981	1.35806	2.96829	1.71813
B2M	44.5131	52.1549	48.099	43.4171	43.9091	42.9062	33.1954	35.4725	31.6159	33.9514	31.3019	36.6535
B3GALNT1	12.1897	13.6943	13.4954	3.2975	2.29091	3.18479	2.3711	0.890523	1.10545	1.35806	2.4286	2.09994
B3GALNT2	68.8926	63.6639	71.2835	50.9281	53.0727	53.5222	46.9478	45.8619	46.4289	37.5163	36.9687	39.8989
B3GALT1	0	0.291368	0	0.366389	0	0.0884665	0.94844	1.18736	1.54763	1.01854	1.34922	0.954519
B3GALT2	3.15016	3.20505	4.84451	0.183195	0.190909	0.0884665	0.47422	0.14842	0	0	0	0
B3GALT5	0	0.145684	0	0	0.190909	0	0	0	0	0.679029	0.809533	0.190904
B3GALT5-AS1	0	0.291368	0	0	0	0.0884665	0	0	0	0.679029	0	0.190904
B3GALT6	28.3514	30.885	29.0671	28.5784	29.9727	28.7516	30.8243	27.6062	34.7112	24.445	29.9527	31.69
B3GAT3	14.929	16.7537	13.4954	18.5027	14.7	16.8086	23.711	20.9273	25.4254	23.5962	20.778	22.5267
B3GLCT	26.4339	29.1368	27.6829	13.0068	13.9364	13.6238	8.53596	13.3578	12.381	6.28101	6.20642	7.44525
B3GNT10	3.56105	4.95326	6.22865	3.84709	2.86364	4.15792	4.7422	3.85893	3.53744	3.39514	3.77782	4.19988
B3GNT2	34.1039	25.4947	30.1052	40.1196	39.3273	42.8178	58.8032	55.8061	50.4086	40.7417	41.0163	39.8989
B3GNT4	0.273927	0.291368	0.346036	0.183195	0	0.176933	0	0.296841	0.22109	0.339514	0	0.381808
B3GNT5	3.15016	3.05936	2.42225	10.6253	7.82728	7.34272	19.443	20.3336	18.7927	7.97859	10.5239	9.35429
B3GNT6	0	0	0	0	0	0	0	0	0	0	0.809533	0.190904
B3GNT8	0.958744	0.291368	0.346036	0.549584	0.381818	1.23853	0	0.593682	1.32654	0.679029	1.34922	0.763615
B3GNT9	22.1881	20.6871	19.7241	17.7699	17.5636	14.7739	18.0204	15.2873	13.4865	11.5435	16.1907	13.1724
B3GNTL1	0.547854	0.437052	0.346036	0.549584	1.14546	0.442332	1.42266	1.4842	1.10545	0.848786	1.88891	1.33633
B4GALNT1	4.51979	5.24462	4.15244	1.46556	1.71818	1.41546	6.63908	4.60104	5.30616	3.90441	2.69844	2.86356
B4GALNT4	1.64356	1.45684	3.46036	1.83195	1.90909	1.15006	1.42266	0.742102	2.2109	0.679029	1.61907	1.52723
B4GALT1	233.386	231.055	223.539	239.435	232.336	238.152	306.346	305.301	290.07	251.58	250.955	256.766
B4GALT1-AS1	1.5066	1.16547	1.03811	1.46556	1.14546	0.884665	3.79376	2.52315	2.87417	2.20684	1.07938	1.90904
B4GALT2	45.8828	43.8509	32.8735	26.1968	21.3818	20.7012	20.3914	21.0757	22.3301	15.9572	16.1907	17.7541
B4GALT3	21.2293	20.5414	19.032	30.2271	30.5455	29.1055	25.6079	32.6525	28.9628	29.7075	34.5401	31.69
B4GALT4	46.9785	43.7052	48.4451	18.5027	20.6182	19.1088	20.8657	22.4115	15.2552	20.0313	17.8097	21.1903
B4GALT5	83.6847	84.351	77.5121	82.9872	78.6546	81.743	95.3182	87.5681	90.2048	62.8101	59.0959	62.6165
B4GALT6	0	0.145684	0.346036	0	0.381818	0	0.47422	0	0.22109	1.1883	1.34922	0.763615
B4GALT7	18.2161	15.4425	16.6097	14.2892	13.9364	14.6854	20.3914	17.9589	17.9083	12.7318	18.8891	16.0359
B4GAT1	19.4488	23.1638	21.8003	15.3884	14.5091	17.8702	25.1336	17.0684	21.6668	31.5748	31.8416	28.2538
B9D1	7.66995	8.01262	13.4954	5.31265	4.77273	5.92725	7.1133	3.56209	5.52725	5.09271	3.77782	4.00898
B9D2	1.5066	2.33094	1.73018	2.38153	2.29091	1.41546	1.89688	3.56209	1.98981	1.35806	2.69844	2.48175
BAALC	7.1221	8.01262	9.34298	32.7919	43.5273	38.0406	38.886	38.1441	35.3744	71.8073	76.0961	82.6614
BAALC-AS1	0.136963	0.145684	0	0.183195	0.190909	0	0	0.14842	0	0.169757	0.269844	0.190904
BABAM1	37.2541	34.5271	30.4512	25.4641	29.7818	26.1861	28.4532	26.2704	30.5104	29.7075	39.6671	36.4626
BABAM2	19.3118	15.7339	16.9558	8.42696	8.4	8.66971	3.79376	6.97576	7.07488	11.5435	9.1747	9.54519
BACE1	122.856	125.434	109.001	50.7449	53.0727	50.1605	49.7931	49.7209	52.8405	46.0042	39.6671	44.0988
BACE1-AS	0.821781	0.437052	0.346036	0.183195	1.52727	0.442332	0.47422	0.445261	0.22109	1.69757	1.34922	1.33633
BACE2	0.547854	0.291368	0.692073	0	0.381818	0.176933	0.47422	1.03894	0.44218	0.339514	0.269844	0
BACH1	155.317	145.83	134.608	264.167	272.046	259.03	216.244	241.48	208.267	296.226	286.305	277.001
BACH2	0	0	0.346036	0.732779	0.572728	0.353866	0.47422	0	0.44218	0.509271	0.809533	0.381808
BAD	22.462	21.1242	20.0701	16.3043	17.9455	16.1009	22.7625	22.8568	17.9083	17.6547	23.2066	19.0904
BAG1	13.8333	10.6349	10.0351	13.7396	16.4182	16.3663	18.9688	22.2631	19.0138	22.7475	24.0161	27.6811
BAG2	213.8	212.699	243.264	108.634	98.7	103.152	54.5353	72.5776	65.6638	41.0812	43.1751	36.8444
BAG3	70.9471	71.5308	71.6295	62.2862	55.5546	54.4069	62.1228	59.3682	63.2318	65.696	66.3817	73.1162
BAG4	79.8497	76.3384	84.4329	73.6443	75.4091	74.0464	74.4525	76.7334	68.5379	67.2238	61.5245	58.9893
BAG5	69.3035	70.5111	62.9786	70.1636	67.0091	65.9075	64.0197	65.7503	60.1365	56.3594	56.9371	57.2711
BAHCC1	10.8201	9.76083	19.7241	9.52612	8.01819	6.90038	7.58752	6.23366	6.85379	11.7132	11.0636	13.7451
BAHD1	26.297	28.117	26.2988	19.4186	16.6091	21.9397	18.0204	22.8568	26.973	26.4821	29.6829	31.3082
BAIAP2	15.2029	17.4821	15.9177	23.0825	19.8546	16.1009	22.2883	23.0052	26.5308	47.532	49.6513	48.4896
BAIAP2-DT	11.9158	12.3831	9.68902	9.89251	8.01819	8.13891	13.2782	12.0221	12.6021	20.5406	26.1749	21.3812
BAIAP2L1	9.99833	11.509	8.99694	5.12945	3.43637	5.57339	3.79376	2.81999	3.09526	3.5649	4.58735	3.43627
BAIAP2L2	0	0.437052	0	0.915974	0	0.0884665	0	0.593682	0.66327	0.169757	1.07938	0.381808
BAIAP3	0.273927	0.72842	0.692073	0.183195	0.381818	0	0	0.14842	0	0.509271	0.809533	0.763615
BAK1	7.53299	9.90651	7.26676	9.70932	8.59091	8.58125	16.1235	12.4673	9.50688	12.3923	12.6827	14.1269
BAMBI	4.65676	4.22484	5.88262	0	0.381818	0.442332	0	0.742102	0.66327	0.509271	0.269844	0
BANF1	32.3234	29.5739	35.6417	27.4792	24.6273	25.3899	26.0821	23.5989	26.973	28.5192	33.1908	33.5991
BANP	9.72441	10.3436	8.99694	8.06057	11.6455	9.20051	13.7524	10.0926	12.8232	11.3737	15.3811	13.3633
BAP1	38.4867	37.2951	41.5244	30.4103	35.3182	34.5019	31.7727	30.723	29.405	53.813	54.7784	51.3531
BARD1	27.1188	29.5739	29.4131	3.4807	5.53637	6.10419	6.16486	3.26525	2.65308	3.90441	2.15875	2.86356
BASP1	116.145	111.448	111.77	203.346	198.546	193.211	138.946	147.085	161.838	108.475	116.303	139.551
BASP1-AS1	0	0	0.346036	0	0.190909	0.176933	0.47422	0	0.44218	0.339514	0	0
BATF2	0.273927	0.437052	1.03811	0	1.52727	0.176933	1.42266	1.78105	0.44218	1.01854	1.88891	3.05446
BATF3	1.09571	1.74821	1.38415	0.915974	0.763637	1.68086	0	0.890523	0.66327	0	1.34922	0.763615
BAX	43.1435	40.3545	39.1021	27.6624	29.2091	26.5399	24.1852	20.482	20.1192	20.3709	22.6669	22.5267
BAZ1A	156.412	146.121	133.57	161.028	144.327	151.366	128.988	117.994	119.168	83.0112	87.6994	83.6159
BAZ1B	142.716	136.652	137.722	144.541	162.082	155.17	156.018	138.773	141.94	149.386	155.16	165.132
BAZ2A	103.544	95.2773	93.7758	121.092	121.991	112.087	118.555	106.566	108.997	147.689	134.382	157.305
BAZ2B	45.4719	46.4732	51.5594	60.0879	57.8455	54.4953	60.7001	52.244	46.2078	58.0569	51.8101	64.9073
BBC3	6.02639	8.44967	7.95884	3.2975	3.43637	4.42332	2.84532	3.85893	4.64289	7.80883	8.09533	5.34531
BBIP1	18.4901	15.0055	16.6097	19.6018	16.8	19.5511	20.3914	20.9273	20.3403	21.3894	21.3177	19.0904
BBOF1	9.03959	9.46946	8.65091	2.74792	3.81818	3.53866	2.3711	2.07789	3.09526	1.35806	4.31751	4.19988
BBS1	22.1881	18.6476	19.7241	7.87737	9.92728	7.43118	8.53596	5.19472	7.29597	11.3737	8.09533	8.97248
BBS10	45.3349	47.6387	57.442	48.7298	57.8455	52.4606	54.5353	54.6187	49.082	63.3194	68.8103	62.0437
BBS12	8.08084	7.72125	7.6128	12.8236	14.8909	13.3584	13.2782	10.3894	9.94906	13.5806	13.4922	15.2723
BBS2	41.9108	41.6656	42.9085	70.7132	62.4273	68.0307	76.3494	74.2102	64.3372	43.4578	48.3021	46.1987
BBS4	21.9142	20.5414	27.3369	13.9228	16.0364	17.6048	20.8657	15.1389	17.0239	26.9914	29.1432	29.5901
BBS5	9.72441	9.61514	11.7652	6.41181	6.10909	5.92725	6.16486	3.11683	3.31635	6.11126	4.8572	4.58169
BBS7	52.0461	48.5128	55.0198	33.891	29.7818	34.8558	35.0923	39.4799	37.3642	25.1241	24.5558	25.9629
BBS9	15.7508	17.3364	15.9177	16.6707	16.9909	14.597	18.4946	21.2241	15.6974	20.5406	18.8891	20.6176
BBX	227.496	219.546	231.498	173.119	172.391	168.175	185.42	188.049	187.927	185.375	173.51	176.968
BCAM	1.64356	2.768	3.11433	0.183195	0.381818	0.265399	1.42266	0.14842	0.44218	0.848786	0.269844	0
BCAN	0	0	0	0.183195	0	0.0884665	0.47422	0.14842	0.44218	0.509271	0.809533	0.190904
BCAP29	223.798	231.783	245.34	451.941	447.109	472.234	387.912	412.164	386.908	361.413	359.972	342.672
BCAP31	79.3018	81.8744	77.5121	104.787	98.5091	93.0667	97.215	98.848	99.9327	91.4991	97.9534	93.7338
BCAR1	85.8761	83.4769	96.8902	69.9804	66.8182	57.5917	53.1126	38.5893	45.1024	57.0384	70.1595	62.2346
BCAR3	84.0956	86.2449	98.2743	75.4762	74.2637	70.6847	73.5041	79.5534	75.8339	67.3936	66.1118	59.7529
BCAS2	42.1847	42.394	34.6036	44.5163	39.3273	46.7103	45.9993	40.222	42.4493	59.5848	60.9848	56.1257
BCAS3	13.6963	12.0918	11.7652	9.89251	10.3091	9.90824	13.7524	10.8347	11.2756	11.883	12.4128	9.927
BCAS4	10.2723	10.7806	11.0732	12.4572	12.4091	11.8545	9.95861	11.4284	8.84361	10.5249	12.143	13.7451
BCAT1	347.75	338.57	371.643	183.012	177.736	206.304	218.615	220.108	211.141	363.959	361.861	328.545
BCAT2	14.1072	15.5882	14.5335	12.8236	15.0818	14.8624	11.8555	11.1315	9.50688	8.3181	10.7938	10.8815
BCCIP	63.4141	74.0075	65.7469	63.019	71.7818	64.9344	59.7517	57.5872	55.4936	73.6746	74.477	83.0432
BCDIN3D	3.15016	3.35073	2.76829	2.74792	2.48182	2.38859	3.31954	3.41367	4.20071	2.20684	2.15875	3.05446
BCDIN3D-AS1	0.958744	1.16547	0.692073	0.732779	0	0.0884665	0	0.890523	0.22109	0.169757	1.07938	0.572711
BCKDHA	8.21781	12.6745	10.0351	11.1749	11.6455	11.766	13.7524	7.71787	9.0647	7.97859	11.6033	9.54519
BCKDHB	35.8844	38.0235	37.0259	11.3581	10.8818	11.5891	9.4844	8.90523	9.0647	7.63907	8.63501	7.06344
BCKDK	47.6633	46.3275	37.0259	51.2945	46.7727	46.5334	37.9376	42.2998	43.5548	35.4792	37.7782	35.5081
BCL10	72.5906	70.9481	74.0518	121.092	128.673	132.877	174.039	159.997	157.195	167.89	145.176	156.923
BCL11A	1.5066	1.31116	1.38415	0.366389	0	0.176933	0.47422	0.296841	0.22109	0.169757	0.809533	0.190904
BCL11B	0	0	0	0.549584	0.190909	0.176933	0.47422	0.742102	0.44218	6.62053	9.1747	8.59067
BCL2	2.73927	2.62231	2.76829	2.56473	1.90909	2.21166	1.89688	2.81999	0.66327	2.3766	1.34922	2.29085
BCL2A1	0.273927	0.291368	0.346036	18.5027	15.8455	17.6933	6.63908	5.49156	6.19052	4.7532	4.58735	2.86356
BCL2L1	48.896	54.1944	53.2896	47.2642	48.1091	46.6218	61.6486	62.3366	62.7896	34.2909	41.2862	43.3352
BCL2L10	0.41089	0.291368	0.346036	0.183195	0.190909	0.176933	0.47422	0.296841	0.22109	0.169757	0.809533	0
BCL2L11	1.91749	3.20505	3.11433	1.64875	3.05455	2.65399	4.7422	4.74946	5.30616	7.63907	11.8731	7.44525
BCL2L12	7.25906	7.72125	9.34298	5.49584	7.82728	6.01572	7.58752	5.19472	8.62252	7.63907	8.63501	8.97248
BCL2L13	88.8893	90.4698	100.697	91.5974	100.991	97.1362	103.38	95.7312	103.028	105.589	114.954	107.861
BCL2L15	0.273927	0.291368	0.346036	0.366389	0.381818	0.265399	0	0.296841	0	0.169757	0.269844	0
BCL2L2	65.0576	77.6496	70.5914	68.5148	68.9182	75.3734	59.2775	55.9545	64.3372	83.5205	89.3184	89.343
BCL3	10.5462	8.88672	10.7271	6.9614	8.97273	7.43118	8.06174	7.42102	9.50688	3.05563	2.96829	2.67265
BCL6	35.0626	33.653	37.718	29.8607	39.7091	32.5557	29.4016	22.2631	22.7723	22.7475	21.3177	24.4357
BCL7A	6.30032	5.53599	5.19054	6.59501	9.35455	9.55438	6.63908	7.71787	9.0647	8.14834	8.09533	5.1544
BCL7B	41.089	35.1098	39.7942	34.6238	41.4273	36.0943	28.4532	37.5504	37.5853	40.9115	41.8259	40.4716
BCL7C	11.9158	13.2572	7.26676	11.3581	10.1182	9.55438	9.01018	8.75681	7.95925	12.562	11.8731	9.54519
BCL9	13.4224	13.2572	12.1113	8.61015	10.3091	10.3506	12.8039	9.20207	10.6123	9.5064	8.36517	8.97248
BCL9L	85.4652	81.146	85.1249	64.8509	63.7637	63.5189	82.5142	65.7503	75.8339	66.8843	56.9371	66.0527
BCLAF1	231.605	236.882	245.34	196.568	204.846	209.666	200.121	205.711	209.593	214.743	213.986	197.013
BCLAF3	28.2145	28.8454	25.2607	16.6707	17.3727	17.074	15.6493	18.4041	15.0341	14.7689	15.651	18.7086
BCO2	0.684817	0.72842	1.73018	0.183195	0.763637	0.442332	0	0.14842	0.22109	0.848786	0	0.190904
BCOR	22.7359	21.7069	20.0701	26.0136	23.4818	22.8243	23.2368	21.0757	25.8675	23.5962	26.7146	20.9994
BCORL1	10.9571	9.46946	12.1113	12.8236	14.3182	11.3237	15.6493	9.49891	10.1701	12.562	17.0002	18.3268
BCR	29.4471	31.7591	33.9116	45.9819	40.0909	40.5176	44.1024	37.2535	39.354	39.2139	41.556	41.617
BCS1L	11.6419	13.9857	16.2637	11.1749	9.73637	7.43118	7.58752	8.31155	7.07488	7.1298	5.93657	8.01796
BCYRN1	0.41089	0.291368	0.346036	0	0	0.176933	0.47422	0.14842	0	0	0	0
BDH2	43.1435	41.957	51.2134	27.8456	23.6727	25.2129	23.711	17.3652	17.245	29.0285	30.2226	34.1718
BDKRB1	26.5709	25.2033	26.6448	44.6995	42	36.3597	42.2056	42.5967	46.4289	26.1426	32.6511	29.0174
BDKRB2	95.7375	100.522	89.6234	202.43	211.336	202.677	215.77	214.616	223.964	203.709	202.653	213.24
BDNF	133.813	135.195	130.456	4.76306	7.06364	8.75818	9.01018	8.90523	9.72797	1.69757	2.96829	3.05446
BDNF-AS	3.42409	3.20505	4.15244	1.64875	0.954546	0.973131	1.89688	1.18736	0.884361	2.20684	1.07938	1.33633
BDP1	0.273927	0	0	0	0.190909	0.265399	0	0.445261	0.884361	0.509271	0	0.572711
BECN1	37.1171	35.1098	38.7561	33.7078	33.6	32.5557	26.5563	24.6378	28.5206	28.3494	26.9844	29.781
BEGAIN	0.136963	0.145684	0	0.183195	0.763637	0.265399	0	0.890523	0.44218	1.52781	0.809533	1.14542
BEND3	4.51979	2.768	4.49847	6.41181	7.06364	7.34272	3.79376	5.93682	4.64289	4.92296	4.58735	4.9635
BEND3P3	5.06765	6.4101	6.57469	4.03028	4.2	2.83093	1.89688	2.96841	2.87417	6.45077	7.01595	5.1544
BEND6	31.3646	28.2627	30.1052	28.7616	28.8273	28.7516	36.5149	35.7693	36.701	31.0656	26.1749	30.7355
BEND7	1.5066	3.93347	1.73018	0.915974	0.572728	0.530799	0.94844	2.52315	1.54763	1.69757	1.88891	2.29085
BEST1	2.05445	1.74821	1.38415	1.64875	1.90909	2.21166	2.3711	1.33578	2.43199	3.05563	2.15875	0.763615
BEST3	0.136963	0.145684	0	1.46556	1.71818	1.68086	2.3711	4.15577	1.98981	5.9415	4.8572	4.58169
BEST4	0.136963	0.291368	0	0.183195	0.381818	0.176933	0.94844	0.14842	0.22109	0.509271	0.269844	0.572711
BET1	63.2771	65.4121	80.2804	103.871	106.336	104.39	109.545	123.634	121.6	112.209	107.128	102.706
BET1L	50.6765	57.5452	50.1753	47.4474	45.2455	43.8794	53.5868	48.3851	52.8405	53.3037	53.1593	53.2622
BEX1	30.4059	31.6134	25.6067	23.6321	25.0091	24.7706	19.9172	19.5915	21.0036	81.1439	85.2708	80.5614
BEX2	0.136963	0.145684	0	0	0	0.265399	0.47422	0.14842	0	4.24393	2.96829	4.9635
BEX3	151.756	158.504	149.834	281.021	264.027	272.919	312.511	324.596	333.625	340.363	349.448	350.309
BEX4	24.5165	24.6206	21.4543	31.5095	31.5	28.3977	31.7727	32.8009	30.0683	53.813	59.0959	52.3076
BFSP1	3.97194	4.37052	4.49847	4.57987	3.43637	5.39645	8.06174	9.49891	5.74834	6.45077	4.04766	5.34531
BFSP2-AS1	0	0.145684	0	0.366389	0	0.353866	0	0	0	0.169757	0	0
BGN	69.9883	73.1334	59.8643	48.5466	42.3818	42.8178	71.133	60.1103	66.106	104.061	98.4931	108.815
BHLHE40	9.99833	12.0918	9.34298	140.51	149.864	152.693	235.687	228.568	236.345	145.482	132.763	142.414
BHLHE40-AS1	0.273927	0.291368	1.03811	1.46556	0.190909	0.353866	0	1.33578	0.44218	0.169757	0.269844	0.954519
BHLHE41	10.1353	12.0918	10.0351	16.3043	16.4182	16.6317	31.7727	26.4188	23.4356	39.0441	36.6988	38.3717
BHMT	0.136963	0.145684	0	0	0.381818	0.0884665	0.47422	0.296841	0.22109	0.339514	0	0
BHMT2	14.7921	15.2968	8.30487	18.8691	17.1818	19.4626	25.1336	21.9662	25.2043	36.4978	31.0321	31.1173
BICC1	199.967	195.071	180.977	85.3687	86.4819	90.8551	48.8446	59.5166	68.5379	88.4435	82.5723	83.425
BICD1	50.1286	48.6585	52.2515	71.4459	72.7364	78.5582	101.483	98.4028	101.48	148.198	143.017	139.551
BICD2	98.6137	100.376	96.1981	110.1	105.573	111.733	86.7822	97.5123	91.5313	86.7459	94.9852	94.8792
BICDL1	0.273927	0.291368	0.692073	0.183195	0.381818	0	0	0	0.22109	0.509271	0	0.190904
BICDL2	0	0	0	0	0	0	0	0	0	0.509271	0.269844	0.381808
BICRA	9.03959	9.76083	7.95884	5.49584	5.34546	6.63498	4.7422	5.7884	5.96943	8.3181	8.63501	7.44525
BICRAL	24.3795	24.3292	20.7622	19.9682	17.5636	17.4279	15.6493	14.842	15.6974	23.4265	19.9685	19.4722
BID	46.7045	47.7844	47.753	55.3248	52.3091	54.4069	60.2259	58.7745	52.8405	46.3437	42.3655	43.9079
BIN1	17.1204	19.2303	21.1082	9.89251	11.8364	10.8814	17.0719	9.94417	12.8232	8.82737	9.44455	12.0269
BIN3	20.9554	18.0648	17.6479	18.3195	19.4727	18.0472	16.1235	18.1073	15.6974	23.5962	21.8574	23.4812
BIN3-IT1	0.136963	0.145684	0.346036	0.549584	0.190909	0.265399	0	0.296841	0	0.679029	0.539688	0.572711
BIRC2	213.389	203.521	193.78	164.509	164.755	170.652	193.956	195.618	184.389	174.51	186.732	167.804
BIRC3	10.5462	10.3436	7.26676	3.4807	2.48182	4.86566	6.16486	3.56209	2.65308	3.5649	5.12704	4.00898
BIRC5	47.6633	55.3599	53.2896	15.5716	15.2727	17.5164	1.42266	1.78105	3.09526	1.01854	1.61907	1.14542
BIRC6	302.141	272.283	272.331	264.35	290.182	266.019	267.46	268.938	243.42	263.463	245.019	248.557
BISPR	0.821781	0.145684	0.692073	0	0	0	0	0.296841	0.22109	0.169757	0	0.190904
BIVM	61.3596	61.4786	69.8993	76.3922	70.8273	69.0038	53.1126	57.2903	56.8202	45.6647	42.3655	46.7714
BLACAT1	0	0	0	0	0	0	0	0	0	0.509271	0.539688	0.763615
BLCAP	91.0807	90.0327	85.817	55.1416	51.3546	54.3184	63.0712	59.3682	57.9256	69.6004	69.0801	68.7254
BLID	0.821781	0.291368	0	0.915974	0.572728	0.353866	0.47422	0.14842	0.22109	0	0.269844	0.763615
BLK	0.136963	0	0	0.366389	0.763637	0.0884665	0	0.14842	0	0	0	0
BLM	6.84817	10.1979	9.34298	2.74792	2.48182	3.45019	0.94844	0.445261	1.32654	0.339514	0.539688	0.954519
BLMH	26.8448	29.8652	25.6067	16.8539	14.5091	14.1546	13.7524	14.3968	15.9185	16.4664	16.1907	21.1903
BLOC1S1	11.6419	12.6745	8.99694	8.42696	7.25455	7.51965	4.7422	7.42102	7.29597	15.7874	19.9685	19.854
BLOC1S2	58.2095	59.7304	59.1722	54.592	49.2546	54.4069	68.2876	69.0155	66.327	59.2452	63.1435	65.2891
BLOC1S3	7.53299	6.26441	6.57469	8.06057	8.97273	7.96198	10.4328	7.2726	9.0647	9.5064	6.74611	9.35429
BLOC1S4	17.6683	16.8993	18.3399	26.38	27.1091	27.2477	33.6696	32.2072	27.6363	23.9358	29.1432	28.4447
BLOC1S6	148.194	144.227	147.411	221.299	207.327	223.024	236.161	253.057	245.41	273.309	273.622	239.775
BLVRA	22.325	22.8724	25.2607	13.19	14.7	13.1815	14.7008	15.7326	18.7927	10.5249	9.71439	12.0269
BLVRB	9.31352	9.46946	7.95884	6.59501	9.54546	6.90038	9.01018	7.71787	7.73815	6.11126	5.39688	7.06344
BLZF1	68.7557	76.3384	75.782	94.7117	92.5909	102.179	83.4627	93.3565	85.1197	81.9927	85.5406	88.5794
BMF	0.273927	0.437052	0	0.732779	0.954546	1.327	0.94844	1.33578	1.32654	2.20684	4.8572	2.67265
BMI1	1.64356	2.47663	2.42225	1.83195	0.763637	1.76933	3.79376	1.4842	1.54763	2.88587	2.15875	2.67265
BMP1	40.8151	41.957	37.718	22.3498	23.4818	25.5668	35.5665	30.1294	37.3642	25.1241	24.0161	26.7265
BMP2	9.31352	9.17809	6.92073	620.847	593.728	621.654	494.611	512.051	519.783	344.777	332.988	352.218
BMP2K	50.5395	47.93	40.1402	62.103	60.7091	59.8918	73.9783	66.6408	56.8202	71.6375	59.6356	62.2346
BMP3	1.09571	0.72842	1.73018	1.09917	1.33636	1.15006	1.42266	0.742102	0	1.52781	2.15875	2.09994
BMP4	5.88943	5.53599	7.26676	1.64875	1.33636	1.68086	4.7422	3.41367	2.65308	1.86733	2.15875	1.14542
BMP6	0	0	0	1.28236	0.954546	0.442332	0	1.78105	1.54763	0.339514	0	0.190904
BMP8A	0.958744	0.291368	0.346036	0.549584	0	0.530799	0.94844	0.14842	0	0.509271	1.07938	0.763615
BMP8B	0.136963	0.291368	0	0	0.190909	0.176933	0	0.296841	0	0.339514	0.539688	0.190904
BMPER	57.9355	56.9624	60.9024	67.2325	66.0546	65.819	52.1642	52.244	50.6296	26.1426	26.1749	23.4812
BMPR1A	36.0214	26.6602	29.4131	41.2188	40.4727	37.9521	26.0821	40.5188	30.7315	32.7631	30.7622	31.3082
BMPR1B	0	0	0	0.366389	0.190909	0.265399	0	0	0.22109	0.848786	0.809533	0.190904
BMPR2	427.874	390.724	424.587	317.476	335.809	321.399	318.201	364.075	334.73	351.907	350.797	320.146
BMS1	59.5791	54.7772	65.0548	61.187	52.1182	55.9108	53.1126	52.6893	59.0311	69.2609	71.7786	71.2071
BMS1P1	3.28712	1.74821	2.42225	1.64875	1.14546	2.21166	2.3711	1.33578	1.76872	1.86733	1.07938	1.52723
BMS1P14	0.958744	0.437052	0	0.549584	0.190909	0.619265	0	0.14842	0.22109	2.54636	0.809533	3.43627
BMS1P2	2.05445	1.31116	1.38415	0.549584	0.954546	0.884665	0.94844	0.742102	0.44218	1.1883	0	1.71813
BMS1P20	15.2029	12.2375	8.30487	8.97654	11.4546	13.9777	14.2266	11.4284	13.9287	17.6547	16.1907	19.0904
BMS1P4	5.06765	5.68168	3.11433	1.83195	2.1	2.74246	3.79376	3.71051	0.884361	3.22539	3.23813	2.09994
BMT2	63.688	61.6243	59.8643	68.1484	67.0091	68.9154	62.597	50.9082	52.8405	51.9457	44.5243	44.8624
BNC1	13.8333	11.3634	13.1494	52.2105	55.9364	59.2725	45.5251	39.6283	36.701	62.6404	65.842	66.6254
BNC2	81.0824	82.8942	86.8551	71.4459	70.0637	66.9691	75.4009	75.3976	82.2455	85.0483	80.6834	81.325
BNC2-AS1	1.78053	0.582736	1.03811	0.915974	0	0.265399	0	0.593682	0.66327	0.509271	0.809533	0
BNIP1	8.35477	7.42988	5.88262	4.39667	5.34546	5.83879	5.21642	6.08524	6.41161	10.5249	8.36517	8.78158
BNIP2	183.668	181.377	175.44	200.598	207.9	203.207	209.605	212.241	203.403	217.459	206.971	195.867
BNIP3	83.9586	84.4967	120.767	165.608	166.091	161.982	143.689	158.068	165.597	129.015	139.779	122.942
BNIP3L	322.549	327.206	338.424	676.721	676.009	654.386	691.887	728.596	667.25	566.14	546.704	554.576
BNIPL	0.136963	0.145684	0	0.549584	0.381818	0.0884665	0	0.296841	0.22109	0.339514	0.269844	0.381808
BOC	6.57425	8.1583	7.6128	8.61015	7.25455	7.51965	8.53596	6.82734	9.50688	7.46931	7.55564	6.68163
BOD1	47.6633	55.6513	45.6768	37.0053	39.1364	39.2791	41.2571	36.9567	34.269	29.8773	32.3813	29.3992
BOD1L1	165.863	151.22	147.065	164.692	160.555	169.679	138.472	131.797	133.76	168.399	177.288	172.386
BOD1L2	0.547854	0.582736	0.346036	0.183195	0.381818	0.353866	0	0.14842	0.22109	0	0.269844	0.381808
BOK	23.5577	25.7861	29.4131	18.1363	19.4727	18.578	17.5461	15.5842	17.4661	14.2596	15.1113	12.0269
BOLA1	2.60231	2.91368	3.46036	2.56473	1.90909	3.00786	2.84532	2.37473	2.65308	4.92296	7.01595	6.49073
BOLA3	36.8432	33.9444	41.8704	30.2271	33.7909	30.6979	31.2985	30.4262	32.0581	39.0441	37.5083	44.2897
BOLA3-AS1	7.66995	10.0522	6.92073	8.61015	5.34546	7.34272	7.58752	10.3894	10.1701	10.0157	7.01595	8.59067
BOP1	23.0099	23.6008	21.8003	20.1514	17.7546	19.728	15.6493	13.2094	16.3607	15.4479	14.0319	16.0359
BORA	9.03959	10.9263	14.1875	6.22862	6.10909	6.19265	6.16486	4.60104	4.4218	5.43223	5.39688	4.9635
BORCS5	11.094	9.46946	10.3811	18.3195	15.8455	13.27	14.2266	21.0757	19.677	15.6177	15.3811	16.9904
BORCS6	3.69801	2.91368	3.46036	2.74792	2.67273	1.8578	3.79376	2.52315	5.30616	3.22539	6.47626	5.34531
BORCS7	50.8134	49.0955	58.4801	53.8592	51.3546	53.0799	61.1743	66.1955	63.674	66.8843	64.2229	56.1257
BORCS8	6.71121	7.42988	6.92073	7.32779	6.68182	6.81192	7.1133	6.67892	9.28579	8.48786	8.63501	9.927
BPGM	22.462	23.3094	22.8384	44.5163	34.3637	39.633	55.9579	62.0398	55.9358	73.5048	77.1754	81.5159
BPHL	7.66995	10.1979	7.26676	5.31265	4.77273	3.80406	5.21642	6.5305	3.53744	4.24393	3.23813	7.06344
BPNT1	39.5824	38.1692	39.7942	34.0742	36.8455	37.2444	35.5665	39.9251	36.0377	44.1369	41.2862	47.9169
BPTF	152.44	151.948	148.104	157.364	162.846	164.636	174.513	173.504	173.998	169.248	178.637	171.813
BRAF	631.676	644.943	578.227	749.266	758.864	768.774	629.764	655.276	620.821	524.04	476.545	498.641
BRAP	34.9257	33.5073	26.9908	34.6238	32.2637	32.5557	33.1954	33.9883	42.2282	43.2881	44.5243	41.4261
BRAT1	19.9967	16.4623	20.4161	23.9985	21.5727	21.8512	28.4532	19.5915	25.8675	26.8216	24.8257	25.1993
BRCA1	27.8036	30.0109	25.9527	13.5564	9.16364	11.0583	5.69064	4.60104	6.85379	5.26247	4.58735	4.19988
BRCA2	25.7491	27.5343	22.4924	18.6859	17.1818	19.1972	14.7008	8.75681	7.07488	8.14834	8.63501	9.16338
BRCC3	29.0363	37.1494	33.2195	30.9599	33.7909	35.2097	37.9376	35.4725	38.2486	37.1768	36.6988	37.799
BRD1	36.1584	37.4408	42.5625	33.3414	36.2727	32.4672	31.7727	27.3094	34.0479	32.7631	36.9687	35.699
BRD2	0.41089	0.582736	0	0.732779	0.763637	0.442332	0.94844	0	1.54763	1.52781	0.269844	0.381808
BRD3	39.8564	39.9174	37.3719	31.1431	24.6273	32.1133	28.4532	27.7546	28.7417	22.7475	26.4447	25.0084
BRD3OS	33.83	35.9839	36.3338	28.0288	29.5909	25.8322	24.1852	22.8568	28.0784	37.1768	35.3496	31.4991
BRD4	59.0313	65.2664	61.2484	71.9955	74.6455	67.0576	71.133	59.2198	71.8543	62.9799	55.0482	56.3166
BRD7	23.8316	24.0379	22.8384	23.9985	24.0546	22.0281	18.0204	20.1852	19.4559	23.2567	24.286	25.9629
BRD7P3	0.547854	0.582736	0.346036	0.549584	0.381818	0.353866	0.94844	0.593682	1.10545	0.509271	0.539688	0.190904
BRD8	45.7458	41.8113	38.41	41.402	47.7273	42.6408	34.618	36.363	43.3337	50.4179	52.0799	53.0713
BRD9	30.5429	33.653	29.7591	20.5178	21.3818	23.2667	22.2883	21.0757	18.1294	20.7104	17.5399	21.763
BRF1	12.6006	15.2968	14.8796	10.0757	10.6909	10.9698	17.5461	12.4673	11.4967	12.7318	16.4605	12.2178
BRF2	8.49174	9.46946	10.7271	6.9614	7.25455	5.92725	5.21642	6.38208	5.96943	4.41369	6.47626	7.63615
BRI3	169.424	173.655	168.52	146.556	143.564	145.35	186.843	169.496	198.539	92.0084	101.192	112.251
BRI3BP	1.09571	1.60252	2.07622	0.915974	0.381818	1.0616	1.42266	1.03894	1.32654	0.339514	0.809533	1.14542
BRICD5	0.547854	0.582736	0	0.183195	0.190909	0.176933	0	0.14842	0.22109	0.509271	0	0
BRINP1	0.136963	0	0.346036	0	0	0	0	0	0	0.848786	0.539688	1.90904
BRIP1	45.3349	40.2088	40.4863	9.15974	8.97273	9.28898	2.3711	1.03894	1.76872	2.20684	1.61907	0.381808
BRIX1	78.2061	78.2323	75.0899	62.4694	58.9909	56.5301	54.5353	51.0567	51.0718	59.5848	74.477	65.0982
BRK1	135.457	143.79	134.262	154.067	148.718	148.447	170.719	172.761	169.355	209.141	193.748	196.249
BRMS1	18.2161	21.4155	18.3399	25.0977	22.3364	22.1166	26.0821	22.7083	27.1941	37.0071	36.9687	41.2352
BRMS1L	31.2277	32.6332	31.1433	24.3649	23.2909	22.2935	20.3914	22.2631	22.5512	23.4265	20.5082	23.863
BROX	195.858	180.648	198.625	218.918	221.646	219.751	207.234	218.772	202.74	315.239	300.337	277.383
BRPF1	13.2855	10.7806	15.9177	10.9917	10.6909	12.2084	15.6493	13.8031	13.7076	14.2596	18.3494	25.0084
BRPF3	61.3596	59.1477	60.9024	98.9251	90.8728	84.6624	78.7205	68.4218	82.0244	74.8629	68.8103	68.3436
BRSK1	3.15016	3.49642	4.15244	3.2975	3.81818	2.65399	3.79376	1.92947	2.43199	3.22539	1.88891	3.24536
BRSK2	0.136963	0.437052	0	0	0.381818	0.442332	0.47422	1.33578	0.66327	1.01854	0	0.572711
BRWD1	113.817	106.786	106.233	129.152	143.182	137.211	135.153	131.649	137.739	173.662	186.462	167.995
BRWD3	47.2524	38.1692	39.7942	40.8524	42	42.5524	45.0509	46.0104	50.4086	32.4236	33.4607	29.5901
BSCL2	1.23267	0.72842	0.692073	0.915974	1.14546	0.707732	0.47422	0.14842	1.10545	0.509271	0.539688	1.14542
BSDC1	60.9487	58.8563	51.9054	66.3165	61.8546	59.7149	75.8752	70.4997	80.4768	78.5976	79.8739	75.7888
BSG	227.085	244.603	224.924	246.763	245.7	230.897	286.429	277.695	300.683	246.657	262.289	256.766
BSN	0	0.437052	0.346036	0.183195	0	0.176933	0	0	0.66327	0.848786	0.269844	0.381808
BST1	7.25906	7.57557	5.53658	0.915974	1.14546	0.707732	1.42266	1.92947	0.884361	0.848786	0	0.381808
BST2	1.09571	3.35073	2.76829	0	0	0.176933	0	0.445261	0.22109	0	0	0
BTAF1	93.2721	91.7809	96.1981	117.611	111.682	114.564	126.617	126.603	122.705	137.503	148.954	132.869
BTBD1	212.43	221.585	214.889	263.984	272.809	280.969	262.718	280.069	237.009	247.845	255.542	246.266
BTBD10	52.0461	50.8437	49.1372	37.3717	44.1	39.8099	41.2571	42.4483	38.4697	59.9243	54.7784	55.7439
BTBD11	1.36963	0.291368	1.38415	6.9614	5.34546	6.54652	8.53596	9.20207	10.1701	27.3309	29.1432	30.9264
BTBD18	0.547854	0.145684	0.346036	0.366389	0.190909	0.176933	0	0.14842	0.22109	0	0.539688	0
BTBD19	10.5462	8.88672	6.92073	16.1211	16.9909	16.1009	19.9172	15.1389	22.5512	47.1925	46.1434	45.8169
BTBD2	54.3745	52.4462	53.2896	40.6692	45.6273	41.1369	44.5767	42.003	51.2929	28.1797	26.7146	26.5356
BTBD3	88.4784	95.423	90.3155	52.3937	55.5546	56.0877	61.6486	57.884	51.0718	69.6004	61.7943	61.2801
BTBD6	30.9537	38.4606	30.7972	27.1128	19.6636	26.6284	22.7625	23.4504	22.3301	25.4636	26.1749	21.1903
BTBD8	0.821781	1.45684	0.692073	1.46556	0.572728	0.442332	0.47422	1.18736	0.44218	0.679029	1.07938	0.763615
BTBD9	26.0231	21.2699	29.4131	32.975	34.1727	32.1133	36.0407	34.2851	33.3846	42.609	38.3179	39.8989
BTD	12.8746	16.8993	16.9558	6.22862	7.44546	5.57339	9.01018	9.49891	7.95925	4.7532	5.39688	6.10892
BTF3	232.564	223.479	219.041	213.971	186.9	206.392	172.616	165.934	166.702	219.326	221.542	230.421
BTF3L4	56.5659	56.8168	60.2103	41.5852	39.9	39.5445	43.6282	47.643	51.2929	72.1468	69.35	67.1981
BTG1	108.886	101.396	113.5	349.719	339.627	346.258	391.706	390.049	368.778	314.56	307.622	305.446
BTG2	25.8861	26.0774	25.6067	8.79335	8.01819	6.98885	6.63908	13.6547	11.4967	9.33664	11.3335	8.39977
BTG3	50.2656	58.4193	61.5945	52.9433	51.9273	51.4875	25.1336	21.6694	18.1294	27.3309	29.1432	26.7265
BTN2A1	52.0461	44.2879	49.8292	54.9584	56.3182	56.4416	57.3806	62.7819	60.1365	55.5106	63.1435	60.5165
BTN2A2	8.76566	12.2375	10.3811	14.106	16.9909	15.924	19.443	17.662	15.9185	13.5806	15.1113	20.6176
BTN2A3P	2.19142	2.47663	2.07622	2.56473	2.48182	2.91939	3.79376	3.11683	3.09526	3.5649	2.96829	2.86356
BTN3A1	13.0115	12.3831	15.9177	4.39667	8.97273	8.40431	7.58752	6.67892	5.74834	6.28101	5.39688	5.91802
BTN3A2	19.4488	18.9389	21.1082	15.7547	17.3727	16.6317	15.6493	16.1778	17.245	16.806	14.8414	18.1359
BTN3A3	11.231	16.7537	12.8033	2.38153	4.39091	2.91939	5.69064	5.7884	5.30616	3.90441	5.93657	6.10892
BTNL8	0	0	0.346036	0	0	0	0.47422	0	0	0	0.269844	0
BTRC	44.5131	48.5128	39.1021	38.2877	40.0909	34.325	45.0509	39.7767	35.5955	23.766	24.5558	24.8175
BUB1	38.3498	44.4336	44.9847	12.274	16.0364	12.1199	0.94844	1.03894	1.54763	1.1883	1.07938	1.14542
BUB1B	24.1056	31.4677	23.5305	7.51098	7.44546	10.616	0	1.03894	2.2109	0.848786	0.539688	0.572711
BUB3	183.394	191.72	192.742	157.364	149.1	160.567	130.41	128.977	121.6	175.189	177.288	181.55
BUD13	8.08084	9.17809	8.30487	3.66389	4.96364	5.57339	5.21642	6.08524	4.86398	5.9415	10.5239	7.63615
BUD23	31.2277	33.216	28.721	24.5481	22.9091	25.2129	20.3914	20.482	20.3403	27.3309	26.9844	26.5356
BUD31	27.1188	25.349	24.5686	26.9296	25.7727	28.3977	20.8657	24.341	28.7417	49.2296	42.3655	52.6895
BVES	37.391	36.2753	40.4863	64.1181	70.4455	64.3151	41.7313	43.6356	46.65	18.5035	17.8097	18.5177
BVES-AS1	0.41089	0.145684	0	0.549584	0.381818	1.0616	0.47422	0	1.10545	0.509271	0.539688	0.954519
BYSL	21.2293	19.6673	21.4543	20.5178	23.6727	17.5164	15.6493	13.8031	17.0239	15.9572	14.0319	18.5177
BZW1	172.026	165.497	187.898	210.308	218.4	225.501	232.842	233.762	217.774	203.199	197.796	191.095
BZW2	107.653	106.495	111.424	87.2007	97.1728	96.5169	93.8955	84.006	87.3306	73.5048	63.6832	72.7344
C10orf105	0.821781	1.31116	1.03811	0.915974	1.14546	1.0616	2.3711	2.37473	2.87417	2.54636	1.61907	3.43627
C10orf111	0.958744	0.72842	1.38415	0	0.190909	0.0884665	0.94844	0.445261	0.22109	0.169757	0.269844	0.381808
C10orf143	1.64356	1.45684	1.03811	0.366389	0.763637	0.796198	0.94844	1.33578	2.65308	0.509271	0.539688	0.190904
C10orf25	3.83498	2.18526	4.15244	3.11431	2.86364	3.53866	2.84532	2.67157	2.2109	2.54636	2.15875	3.24536
C10orf55	0.547854	1.01979	1.03811	0.366389	0.381818	0.884665	1.42266	0.14842	0	0.679029	0.539688	0.381808
C10orf67	0.273927	0.291368	0.346036	0.915974	0.954546	0.530799	0.94844	0.296841	0.66327	1.01854	0.269844	0.381808
C10orf88	26.8448	25.2033	28.0289	28.7616	29.9727	26.2745	26.5563	27.7546	23.8777	22.0684	25.0955	23.2903
C10orf90	0.273927	0	0	0.183195	0.381818	0.0884665	0.94844	0.296841	0.44218	0	0	0
C11orf1	6.57425	6.11873	8.99694	3.11431	3.81818	4.60026	5.69064	4.45261	3.53744	4.7532	5.12704	5.72711
C11orf24	61.6336	62.4984	64.0167	45.7987	42.1909	37.1559	45.0509	41.7062	35.8166	31.0656	32.921	34.7445
C11orf42	0.136963	0	0	0.183195	0.190909	0.0884665	0	0	0	0	0.539688	0.190904
C11orf44	0.136963	0.145684	0.346036	0	0.381818	0	0.47422	0	0	0.169757	0	0
C11orf45	1.09571	0.874104	1.03811	0.549584	0.381818	0.619265	0	0.742102	1.54763	1.52781	1.88891	1.52723
C11orf49	19.0379	21.9983	13.1494	10.0757	14.1273	10.439	14.2266	12.0221	14.1498	14.2596	15.1113	12.2178
C11orf54	25.7491	27.68	29.7591	31.3263	23.4818	28.7516	38.4118	32.6525	31.3948	27.1611	24.0161	25.0084
C11orf58	257.217	264.854	268.178	242.733	251.618	250.36	208.657	219.959	207.161	252.938	244.209	239.966
C11orf65	0.684817	1.01979	0.692073	0.366389	1.33636	0.884665	0.47422	1.4842	0.44218	0.679029	1.34922	0.572711
C11orf68	34.1039	37.5865	35.9878	28.7616	27.8727	23.4436	24.1852	23.5989	22.3301	33.2724	24.0161	30.5446
C11orf71	2.73927	2.62231	1.38415	1.28236	1.90909	1.68086	1.89688	1.03894	3.53744	0.848786	0.539688	0.954519
C11orf74	12.1897	10.9263	9.34298	5.49584	4.58182	6.01572	2.3711	5.7884	5.08507	7.63907	8.36517	8.59067
C11orf80	4.65676	4.80757	5.88262	5.12945	4.00909	2.83093	7.1133	4.00735	5.08507	6.62053	5.93657	4.39079
C11orf87	1.23267	1.60252	1.73018	0.183195	0.381818	0.265399	0.47422	0.445261	0.22109	0	1.61907	0.572711
C11orf88	0.684817	0.582736	1.03811	0	0	0	0	0.14842	0	0	0	0
C11orf91	4.65676	3.05936	2.42225	12.4572	9.73637	10.0852	8.53596	11.5768	11.2756	11.5435	13.4922	11.2633
C11orf94	0	0.291368	0	0.183195	0.190909	0	0	0	0	0.169757	0	0.190904
C11orf95	33.0082	34.3814	25.9527	54.592	57.6546	55.8223	65.4423	61.8913	64.1161	81.1439	73.3976	78.6524
C11orf96	0.547854	0.437052	1.38415	31.3263	26.9182	22.5589	11.8555	16.1778	17.6872	17.3152	23.4764	20.2358
C11orf98	0.136963	0	0.692073	0.549584	0.381818	0.353866	0.47422	0.445261	0.884361	0	0	0.381808
C12orf10	14.6551	15.5882	13.8415	18.3195	15.0818	18.2241	19.443	16.9199	23.2145	18.843	18.3494	18.1359
C12orf29	50.4026	49.6782	46.3689	62.2862	75.4091	72.9848	72.0814	68.5703	68.3169	67.2238	73.1278	69.2981
C12orf4	42.8696	44.4336	39.4481	24.9145	26.9182	23.7975	26.0821	25.8252	29.1839	33.9514	31.8416	33.2173
C12orf43	11.094	14.8598	8.99694	11.9077	12.9818	12.2084	9.4844	14.3968	12.16	8.99713	12.6827	14.3178
C12orf45	4.79372	7.2842	4.84451	4.76306	2.86364	3.00786	0.94844	2.81999	2.87417	5.26247	4.8572	7.25434
C12orf49	41.089	41.957	39.7942	58.9887	63.5728	61.3957	68.2876	78.5144	68.3169	23.5962	30.4924	29.2083
C12orf56	0	0	0	1.46556	0.572728	0.530799	2.84532	1.03894	0.22109	0.679029	0.809533	0.572711
C12orf57	35.0626	42.9768	36.6799	42.5012	40.8546	40.6946	60.2259	58.7745	62.7896	49.9086	56.3974	56.8893
C12orf60	0.41089	0.437052	1.38415	1.09917	0.190909	0.619265	0.94844	1.03894	0	0.169757	0.269844	0.381808
C12orf65	12.4637	13.6943	16.9558	5.67904	5.53637	8.84665	5.69064	6.38208	5.74834	9.84591	8.90486	7.25434
C12orf66	6.98514	5.24462	5.88262	8.97654	6.87273	8.84665	8.53596	7.86629	6.85379	4.41369	4.8572	4.39079
C12orf71	0	0	0.692073	0	0.190909	0	0	0	0.22109	0	0	0.190904
C12orf73	4.79372	3.93347	2.07622	3.66389	3.24546	3.09633	9.4844	10.241	8.84361	12.562	15.651	12.4087
C12orf75	1666.16	1681.63	1802.85	791.951	784.637	773.639	393.128	412.015	400.836	385.349	427.973	379.899
C12orf76	5.06765	5.39031	4.15244	2.56473	2.86364	4.24639	6.16486	5.7884	4.20071	4.41369	4.58735	5.1544
C14orf119	69.0296	66.4319	60.5564	79.6897	76.5546	85.5471	70.1845	81.7797	80.6979	72.3165	73.3976	76.7433
C14orf132	102.997	98.0453	90.3155	78.9569	81.7091	81.4776	98.1635	98.2544	105.681	108.645	111.176	117.788
C14orf28	10.4092	10.7806	8.30487	8.79335	7.25455	8.58125	12.3297	8.31155	10.1701	6.79029	6.20642	5.72711
C14orf93	2.73927	4.07915	4.15244	2.19834	1.71818	2.21166	1.42266	1.92947	1.32654	2.03709	2.15875	3.05446
C15orf39	9.03959	10.3436	8.99694	11.7245	12.4091	10.0852	11.3813	10.8347	13.9287	11.883	16.1907	12.0269
C15orf40	11.094	11.3634	13.8415	10.2589	7.82728	10.0852	9.01018	9.49891	10.8334	10.1854	7.82548	9.16338
C15orf41	24.6534	24.1835	21.4543	9.52612	6.49091	6.90038	5.69064	5.49156	6.85379	5.77174	4.31751	5.1544
C15orf48	2.60231	1.45684	4.49847	40.6692	43.3364	40.6946	55.0095	60.704	48.8609	14.0898	11.8731	15.6541
C15orf61	7.94388	6.84715	13.1494	6.22862	5.72728	6.54652	6.16486	7.12418	7.07488	5.43223	10.2541	8.20886
C15orf62	1.09571	1.16547	2.42225	0.183195	0.572728	0.796198	1.89688	0.296841	1.32654	0.509271	0.269844	0.763615
C15orf65	1.36963	0.72842	1.03811	1.46556	1.14546	1.327	3.31954	1.4842	1.10545	3.5649	1.88891	3.62717
C16orf46	2.60231	3.93347	2.07622	5.12945	3.24546	1.8578	2.3711	2.37473	3.09526	5.26247	4.8572	5.91802
C16orf58	36.8432	37.2951	33.2195	25.0977	26.9182	25.3899	20.3914	24.0441	21.6668	26.3124	24.286	28.6356
C16orf70	17.8053	16.1709	13.1494	19.4186	14.7	17.6048	24.6594	18.9978	14.5919	23.2567	21.3177	20.9994
C16orf71	0.136963	0.582736	0	0.366389	0.190909	0	0	0.14842	0.44218	0.339514	0.809533	0
C16orf72	101.764	97.754	91.3536	138.678	141.082	137.477	116.658	129.423	120.936	177.057	159.748	167.041
C16orf74	2.32838	2.33094	2.76829	7.14459	3.62727	6.01572	0.94844	3.41367	3.31635	3.39514	4.04766	2.86356
C16orf86	0.41089	1.16547	0.692073	0.732779	0.572728	0.530799	0	0.296841	0.884361	0.509271	0.539688	0.954519
C16orf87	25.6122	25.7861	22.4924	14.2892	16.4182	16.6317	10.9071	15.5842	17.0239	24.445	22.9368	25.1993
C16orf90	3.15016	5.24462	5.19054	2.19834	5.34546	4.60026	2.3711	3.11683	3.97962	2.71611	2.96829	3.81808
C16orf91	6.16336	6.70146	6.57469	5.86223	6.68182	7.78505	15.6493	9.35049	5.52725	11.5435	10.7938	11.0724
C16orf95	1.91749	2.03958	2.76829	1.46556	1.33636	1.15006	1.89688	1.18736	1.76872	1.1883	1.07938	0.763615
C17orf100	0.821781	0.72842	1.73018	1.28236	1.71818	2.1232	1.42266	1.33578	1.98981	3.5649	2.69844	1.33633
C17orf107	0.547854	0.437052	0.346036	0.183195	0	0.176933	0	0.14842	0.884361	0.169757	0	0.381808
C17orf51	23.9686	22.8724	24.9146	48.3634	46.7727	51.7529	48.8446	47.0493	44.6602	85.5576	77.7151	80.1796
C17orf53	1.78053	2.91368	3.11433	2.01514	2.67273	2.1232	1.89688	0.890523	2.65308	0.848786	0.269844	0.572711
C17orf58	14.1072	14.277	17.3018	8.97654	9.92728	8.22738	9.01018	11.8736	11.4967	6.62053	7.82548	7.06344
C17orf67	4.38283	4.66189	5.53658	5.49584	3.43637	3.80406	3.79376	3.41367	3.31635	1.52781	1.34922	2.67265
C17orf75	22.8729	24.0379	26.2988	10.0757	11.4546	10.9698	11.8555	10.241	7.95925	13.4108	14.8414	14.5087
C17orf80	32.7343	32.1962	29.7591	18.5027	16.6091	19.1088	13.2782	17.0684	20.1192	13.4108	15.3811	12.9815
C17orf82	0.41089	0.145684	0	0	0.190909	0.176933	0.47422	0.296841	0.44218	0	0	0.190904
C17orf97	1.5066	1.16547	1.73018	1.09917	0.954546	0.707732	0.47422	0.890523	0.22109	1.52781	1.34922	0.954519
C18orf21	19.8597	20.5414	15.5716	19.2354	16.9909	19.2857	15.175	19.7399	16.3607	20.5406	25.0955	24.2448
C18orf25	65.8794	64.2466	66.0929	56.6072	52.1182	51.6644	59.2775	54.4703	51.9562	78.5976	74.7468	75.407
C18orf32	0.684817	0.145684	1.03811	1.28236	0.381818	0.619265	1.42266	0.742102	1.54763	0.679029	1.07938	1.52723
C18orf54	26.8448	29.4282	25.6067	12.6404	11.6455	11.5006	11.8555	11.8736	16.5818	10.0157	9.44455	9.16338
C18orf63	0	0	0	0	0	0	0	0.14842	0.22109	0.509271	0	0.381808
C18orf65	0.41089	0.582736	0.346036	1.09917	0.763637	0.353866	0.94844	0.890523	1.32654	0.169757	0.269844	0.190904
C19orf12	58.8943	53.029	56.75	49.4626	59.3728	55.9108	47.8962	52.244	54.6093	49.0598	42.3655	48.6805
C19orf18	0.821781	0.291368	1.03811	0.549584	0.190909	0.707732	0.47422	0.742102	0.66327	0.848786	1.88891	2.86356
C19orf24	14.7921	16.0252	15.2256	21.617	19.8546	19.3742	20.8657	22.2631	21.4457	15.9572	22.6669	22.5267
C19orf25	15.066	13.84	20.0701	10.9917	11.0727	12.6507	12.3297	11.28	15.4763	14.2596	19.9685	16.0359
C19orf38	0	0	0.346036	0.183195	0.190909	0	0.47422	0.14842	0.22109	0.509271	0	0
C19orf44	4.38283	4.07915	5.19054	3.84709	4.2	3.45019	4.26798	4.74946	3.31635	6.28101	7.55564	3.81808
C19orf47	9.72441	8.74104	10.3811	10.0757	6.3	7.07732	12.3297	5.49156	7.73815	7.97859	11.6033	9.16338
C19orf48	16.2987	16.7537	14.5335	9.70932	7.25455	9.55438	5.21642	8.45997	7.29597	6.62053	7.01595	5.1544
C19orf53	48.896	46.7646	40.4863	60.0879	53.6455	56.3531	79.1947	69.9061	73.8441	68.9214	68.0007	80.1796
C19orf54	3.56105	4.22484	3.46036	2.74792	2.67273	2.47706	3.79376	2.81999	3.75853	2.20684	3.23813	1.71813
C19orf57	0.273927	0	0.346036	0	0	0.0884665	0	0	0.66327	0	0	0.381808
C19orf66	22.462	16.8993	20.7622	21.9834	21.9546	18.7549	18.9688	21.0757	20.3403	15.9572	16.4605	17.945
C19orf70	16.0247	16.0252	11.0732	11.3581	11.2636	12.2968	11.8555	14.6936	15.2552	11.0342	12.6827	15.2723
C19orf71	1.64356	2.03958	2.76829	2.56473	2.86364	3.09633	5.21642	3.11683	2.87417	3.73466	4.31751	3.43627
C19orf73	0	0.145684	0.346036	0.366389	0	0	0.47422	0.14842	0.22109	0.169757	0	0
C1D	33.83	38.4606	39.1021	37.9213	36.6546	39.8099	27.979	32.5041	32.2792	46.1739	40.7465	34.5536
C1GALT1	113.954	115.964	117.998	154.433	164.564	161.982	150.802	159.552	170.018	153.121	154.081	144.323
C1GALT1C1	60.127	70.2197	64.0167	89.5822	83.6182	89.0857	107.174	101.371	92.4157	36.6675	39.3973	37.0353
C1orf100	0	0	0.346036	0.732779	0.190909	0.0884665	0	0.14842	0	0	0	0
C1orf109	32.3234	36.8581	39.7942	28.0288	29.5909	27.69	31.2985	26.8641	26.7519	32.0841	33.1908	33.79
C1orf112	13.6963	14.5684	13.1494	7.69418	6.49091	7.60812	7.1133	6.97576	4.4218	3.90441	2.96829	4.58169
C1orf115	2.60231	1.89389	3.8064	0.366389	0.763637	0.707732	0.47422	0	0.44218	0.169757	0.809533	0.381808
C1orf122	36.1584	37.7322	38.41	31.8759	31.8818	29.9017	39.8345	41.4093	45.9867	38.3651	44.7941	42.5716
C1orf123	16.1617	20.3958	15.9177	11.3581	12.2182	11.766	15.175	10.5379	12.6021	13.2411	9.98424	12.0269
C1orf131	17.9422	18.6476	19.378	8.42696	10.8818	12.9161	14.2266	9.94417	13.4865	8.3181	6.47626	8.20886
C1orf146	0.136963	0.437052	0.346036	0.183195	0.190909	0.0884665	0	0.14842	0	0	0.269844	0
C1orf159	4.38283	6.11873	5.19054	3.66389	5.91818	5.75032	9.95861	5.93682	8.84361	7.1298	11.0636	5.1544
C1orf162	0.273927	0.145684	0	0	0.190909	0.176933	0.47422	0	0.22109	0.169757	0	0
C1orf174	25.2013	28.4084	22.1463	20.5178	19.2818	22.0281	24.1852	19.4431	18.3505	18.164	18.8891	16.6086
C1orf198	193.255	183.416	203.469	54.2256	56.5091	56.3531	46.4735	49.1272	40.0173	52.1154	47.2227	48.4896
C1orf21	19.9967	20.2501	18.3399	5.86223	6.49091	6.36959	4.7422	10.3894	7.95925	2.03709	2.15875	2.86356
C1orf216	29.7211	29.7195	23.1844	29.6775	29.0182	31.2287	35.5665	27.7546	30.9526	41.4207	43.9846	37.799
C1orf220	1.09571	1.45684	1.38415	0.915974	0.381818	0.973131	0.47422	0.593682	0.22109	0.339514	1.07938	0.381808
C1orf226	2.60231	2.62231	2.76829	0.183195	0.190909	0.530799	0	0.445261	0.44218	0.509271	0	0.190904
C1orf229	0.273927	0.291368	0	0.732779	0	0.530799	0.94844	1.03894	0.22109	0.679029	0.269844	0.381808
C1orf35	12.8746	7.72125	11.7652	9.89251	9.35455	7.25425	14.2266	8.60839	10.1701	12.562	18.3494	15.4632
C1orf43	150.249	146.995	132.186	172.753	170.864	169.502	113.813	133.875	129.559	128.167	111.716	116.451
C1orf50	6.71121	4.95326	4.49847	4.76306	4.58182	6.72345	5.69064	4.74946	6.19052	4.41369	3.50797	6.29983
C1orf52	33.9669	37.8778	35.2957	30.7767	33.2182	33.6173	37.9376	46.4556	46.8711	66.375	69.0801	58.4166
C1orf53	12.7376	11.8004	11.4192	4.76306	5.72728	5.57339	6.63908	8.60839	9.50688	4.41369	4.31751	4.39079
C1orf54	6.16336	4.07915	3.11433	2.01514	4.2	4.42332	8.53596	4.74946	5.96943	5.09271	5.66673	4.7726
C1orf56	2.73927	2.03958	2.42225	1.28236	3.24546	2.1232	3.79376	2.22631	2.87417	4.24393	4.04766	2.29085
C1orf74	3.42409	3.35073	2.76829	3.66389	2.1	2.74246	2.3711	2.07789	2.65308	3.73466	2.96829	3.81808
C1QBP	76.5626	69.6369	79.5884	80.6057	80.5637	82.4507	59.7517	57.884	56.1569	53.3037	47.4926	54.2167
C1QL1	0.136963	0.145684	0	0.183195	0.190909	0	0.47422	0	0	0	0	0
C1QL3	0.821781	1.01979	1.73018	0.732779	0.572728	0.353866	0.94844	0.296841	0.66327	1.1883	2.96829	0.763615
C1QTNF1	26.4339	22.7267	25.9527	47.081	47.5364	38.9252	36.9891	29.3873	31.1737	15.7874	15.9208	18.1359
C1QTNF1-AS1	0	0.145684	0	0.366389	0	0.0884665	0	0.14842	0	0	0.269844	0.190904
C1QTNF12	0	0.145684	0	0.183195	0	0.176933	0	0.14842	0	0.339514	0.269844	0
C1QTNF2	1.5066	2.18526	0	0.366389	0	0.265399	0	0.593682	0.66327	0.509271	0.269844	0.763615
C1QTNF3	0.41089	1.45684	1.38415	0	0.190909	0.530799	1.42266	0.593682	0.44218	0.848786	0.539688	1.90904
C1QTNF6	4.65676	4.07915	3.46036	2.38153	3.24546	1.8578	4.26798	3.11683	4.4218	2.3766	1.61907	3.05446
C1QTNF9	0.136963	0	0	0.366389	0	0.176933	0	0.14842	0	0.169757	0.539688	0.190904
C1R	33.556	34.9642	38.064	5.67904	5.91818	6.19265	11.3813	12.1705	12.8232	10.8645	8.09533	8.59067
C1RL	22.7359	21.7069	22.8384	9.89251	12.9818	13.5354	18.0204	17.662	17.245	13.9201	14.5716	16.4177
C1RL-AS1	5.6155	6.84715	6.22865	6.04543	6.87273	5.13105	8.06174	5.93682	8.62252	6.79029	5.66673	10.1179
C1S	60.6748	57.8365	57.7881	15.9379	16.2273	17.7818	29.4016	32.8009	24.9832	25.9728	22.3971	22.1448
C20orf144	0.136963	0	0	0.183195	0.572728	0.265399	0.47422	0.14842	0	0.169757	0.269844	0.190904
C20orf194	79.4388	78.815	74.3978	70.3468	69.1091	68.0307	80.6174	74.5071	79.8135	64.5077	59.9054	61.471
C20orf204	0.136963	0.437052	0	0.183195	0	0	0.47422	0.14842	0	0	0	0.190904
C20orf27	16.5726	16.7537	13.4954	14.4724	15.8455	11.2352	15.175	12.7642	8.84361	11.0342	11.0636	12.2178
C20orf96	3.15016	2.768	1.73018	2.38153	1.71818	1.94626	2.3711	2.37473	2.87417	3.22539	4.58735	6.10892
C21orf58	3.83498	5.68168	4.15244	1.46556	0.572728	0.884665	1.42266	1.03894	1.10545	2.3766	1.07938	2.29085
C21orf59-TCP10L	0.684817	1.01979	0.346036	0.549584	0.763637	0.707732	0	0.296841	1.10545	4.58344	5.12704	4.58169
C21orf91	29.0363	25.7861	29.7591	18.1363	20.4273	22.8243	15.175	15.2873	17.0239	37.8558	40.2068	31.1173
C22orf15	0.273927	0.145684	0.346036	0.183195	0	0	0	0	0	0.169757	0	0.190904
C22orf23	10.4092	9.03241	8.65091	12.6404	8.01819	7.87351	7.1133	8.01471	9.28579	14.2596	11.6033	11.836
C22orf24	0.41089	0.291368	0.692073	0	0.190909	0.176933	0	0	0	0.169757	0	0
C22orf39	10.5462	10.9263	11.0732	8.24376	6.68182	6.54652	7.1133	5.63998	7.73815	7.1298	6.74611	8.01796
C22orf46	8.08084	8.44967	7.26676	4.94626	5.15455	4.68872	5.21642	3.26525	4.20071	7.29956	7.82548	8.39977
C2CD2	69.4405	72.2593	68.1692	275.708	297.246	279.996	310.14	297.583	294.271	318.125	340.274	304.11
C2CD2L	8.76566	8.01262	8.30487	14.106	11.8364	12.2084	19.9172	13.9515	14.3709	21.0499	17.8097	21.5721
C2CD3	33.83	33.7987	37.3719	24.5481	25.3909	24.1513	18.4946	22.2631	22.5512	20.8801	21.0478	20.6176
C2CD4A	0	0	0	0.549584	1.14546	0.353866	0	0	0.22109	0	0	0
C2CD4C	0.136963	0	0	0.549584	0.190909	0.176933	0.47422	0.742102	0.884361	0.169757	0.809533	0.381808
C2CD5	51.9092	49.5326	49.4832	19.785	20.8091	23.2667	24.1852	19.2947	19.2348	29.7075	28.6035	27.872
C2CD6	1.09571	0.291368	0.346036	0.549584	0.763637	0.884665	0.94844	0.445261	0.884361	0.339514	0.539688	0.763615
C2orf15	0.136963	0.145684	0.692073	0	0	0.265399	0.47422	0.445261	0.66327	0.169757	0.269844	0.381808
C2orf16	2.87623	2.768	3.11433	3.66389	5.91818	5.57339	1.42266	3.85893	4.20071	6.96004	4.8572	8.39977
C2orf27A	4.1089	3.6421	5.19054	7.32779	5.72728	5.39645	6.63908	4.89788	5.30616	6.96004	4.8572	4.9635
C2orf42	9.86137	13.5486	18.3399	18.8691	14.7	14.6854	10.4328	15.7326	16.5818	20.0313	17.8097	17.3722
C2orf49	44.7871	45.3077	54.3277	37.5549	34.1727	36.0943	30.8243	40.222	38.0275	32.5934	41.2862	39.3262
C2orf66	1.91749	1.60252	0.346036	1.28236	1.71818	1.41546	0.94844	1.4842	2.43199	1.35806	1.34922	1.52723
C2orf68	15.066	15.8796	15.5716	12.6404	11.6455	11.943	6.63908	9.79575	9.72797	13.7503	11.8731	9.35429
C2orf69	60.4009	61.6243	65.7469	68.8812	61.0909	65.1113	58.329	57.7356	58.1467	56.3594	50.7307	51.7349
C2orf74	15.3399	19.6673	20.0701	10.6253	11.0727	10.616	9.4844	9.94417	10.8334	19.1826	21.5875	18.7086
C2orf76	8.6287	8.74104	11.0732	9.15974	7.25455	8.66971	8.53596	12.3189	11.9389	10.3552	13.2224	9.73609
C2orf81	1.09571	0.437052	2.07622	1.09917	1.90909	1.0616	2.84532	2.22631	1.98981	2.88587	1.61907	2.86356
C2orf88	2.73927	1.16547	2.07622	2.38153	1.52727	1.94626	0.94844	1.03894	1.54763	0.679029	1.34922	0.954519
C2orf92	1.36963	2.03958	1.03811	1.64875	2.67273	2.74246	1.89688	3.41367	2.87417	4.41369	4.04766	3.24536
C3	17.3944	12.5288	13.4954	41.2188	38.3727	32.2018	19.443	18.5526	15.6974	11.3737	11.0636	13.5542
C3AR1	0.41089	0.72842	0	3.66389	2.67273	2.83093	5.69064	7.12418	5.52725	0.339514	0.809533	1.90904
C3orf14	8.49174	8.59536	12.8033	7.51098	7.25455	8.13891	8.06174	10.5379	9.0647	9.84591	12.4128	11.2633
C3orf18	9.58744	6.99283	8.99694	3.66389	4.96364	4.68872	9.95861	5.63998	7.51706	5.60199	6.47626	6.10892
C3orf20	0	0.291368	0	0.366389	0.190909	0.176933	0	0	0.22109	0	0.269844	0
C3orf33	5.6155	4.22484	5.19054	3.84709	3.81818	3.98099	0.94844	3.56209	3.53744	4.07417	3.23813	3.43627
C3orf35	0.821781	0.874104	0.692073	0.549584	0	0.707732	0.47422	0.742102	1.10545	0.509271	0.269844	0.572711
C3orf38	44.3762	48.0757	39.1021	41.0356	41.4273	42.9062	47.422	42.8935	48.4187	40.2324	36.9687	42.5716
C3orf49	0.273927	0	0.346036	0	0.572728	0.176933	0	0	0.22109	0	0	0.190904
C3orf52	9.99833	9.90651	7.6128	14.106	14.5091	13.093	10.4328	9.49891	10.6123	26.4821	28.0638	24.8175
C3orf58	73.5494	80.5632	79.2423	116.512	115.309	110.583	98.1635	112.206	100.154	119.509	119.001	107.861
C3orf62	7.25906	8.44967	4.84451	7.51098	7.06364	6.54652	6.16486	7.56945	7.07488	8.3181	11.0636	8.20886
C3orf67	6.98514	5.53599	4.49847	23.2657	24.0546	22.9128	19.9172	19.7399	25.6465	27.1611	29.1432	31.69
C3orf70	5.06765	2.03958	5.53658	1.09917	2.1	2.1232	1.42266	1.03894	0.884361	1.1883	0.809533	1.52723
C3orf80	0.821781	0.874104	0.346036	0.549584	0.572728	0.442332	0.47422	0.593682	0.22109	0.509271	1.07938	0.381808
C4orf3	127.924	134.903	130.11	111.932	106.909	107.31	207.234	242.668	234.356	126.639	114.144	120.269
C4orf33	12.4637	10.3436	12.8033	2.19834	3.62727	4.06946	0.94844	2.96841	2.2109	2.88587	3.77782	1.33633
C4orf36	1.5066	0.437052	1.03811	0.549584	0.572728	0.530799	0	0.14842	0.44218	0.169757	0.539688	0.190904
C4orf46	48.2111	48.0757	51.2134	28.3952	35.1273	29.7247	26.5563	30.2778	27.8574	17.8245	14.3017	15.0814
C4orf47	0.136963	0.437052	0	0.183195	0.381818	0.530799	0.47422	0.296841	0.44218	0.509271	0	0.381808
C4orf48	21.5033	23.6008	26.6448	15.9379	14.3182	17.1625	26.5563	24.0441	27.1941	19.3523	29.6829	22.7176
C5	4.79372	6.55578	7.26676	2.19834	1.90909	2.83093	4.26798	2.37473	2.43199	3.22539	1.34922	2.29085
C5AR1	0.41089	0.72842	0.692073	0.183195	0.954546	0.530799	1.89688	1.18736	1.32654	1.86733	0.269844	2.29085
C5orf15	160.521	158.65	167.828	114.313	126.191	112.618	143.214	168.012	163.828	143.445	138.43	136.687
C5orf17	1.78053	2.18526	1.73018	0.915974	0.190909	0.973131	0.47422	0.593682	0.22109	0.848786	0.809533	0.763615
C5orf22	43.8283	39.3347	44.6387	28.7616	25.3909	29.6363	24.1852	27.6062	28.9628	38.3651	36.1591	35.3172
C5orf24	351.585	325.749	373.373	388.373	420.382	404.203	380.798	397.915	377.622	207.443	212.098	190.331
C5orf30	355.146	341.629	373.027	86.4679	89.9182	83.2469	55.0095	68.2734	66.7692	76.5605	80.4136	72.1616
C5orf34	8.08084	8.88672	7.26676	8.42696	8.59091	9.46591	8.53596	11.4284	12.6021	14.4294	16.7303	12.0269
C5orf38	3.69801	3.20505	6.22865	2.56473	2.86364	4.24639	5.69064	6.38208	5.08507	3.22539	5.12704	4.00898
C5orf47	0.136963	0	0	0	0	0.0884665	0	0.296841	0	0	1.07938	0.190904
C5orf51	141.894	125.58	144.989	198.4	187.473	183.656	183.997	192.65	185.937	198.616	185.653	172.195
C5orf56	1.09571	1.45684	1.03811	1.28236	0.572728	1.0616	0	0.296841	0.66327	0.679029	1.07938	0.572711
C5orf63	2.73927	3.93347	2.07622	0.366389	1.14546	0.707732	0	0.890523	1.32654	1.1883	1.88891	1.14542
C5orf66	5.88943	6.99283	5.53658	4.03028	4.58182	4.60026	3.31954	4.30419	4.4218	4.07417	2.4286	3.24536
C6	0.136963	0.291368	0.346036	0	0.381818	0.265399	0	0.296841	1.10545	0.339514	0.269844	1.14542
C6orf106	100.394	98.3367	87.2012	154.8	163.418	158.532	162.183	141.296	158.964	167.89	167.303	174.295
C6orf120	132.992	138.108	152.948	126.954	112.636	126.596	84.4111	95.1375	87.3306	41.4207	51.5402	49.0623
C6orf132	5.75247	5.53599	3.11433	0.732779	0.763637	1.50393	0	0.593682	0.884361	0.509271	0.269844	0.572711
C6orf141	0.684817	0.582736	0	0.183195	1.14546	0.530799	1.89688	1.92947	2.43199	15.6177	11.3335	13.1724
C6orf163	0.958744	0.582736	1.03811	0.183195	0.190909	0.353866	0.47422	0.14842	0.44218	0	0	0
C6orf201	1.64356	0.72842	2.07622	1.64875	1.71818	1.5924	0.47422	1.78105	1.10545	2.20684	1.34922	2.48175
C6orf203	12.3267	13.4029	10.7271	11.7245	13.1727	12.7392	9.4844	12.3189	9.72797	11.3737	9.98424	10.3088
C6orf226	3.28712	2.91368	3.46036	2.56473	3.05455	2.56553	2.84532	3.85893	3.31635	3.39514	4.58735	2.86356
C6orf52	0.136963	0	0	0.366389	0	0.176933	0	0.593682	0	0.339514	0.269844	0.190904
C6orf62	223.935	215.612	228.384	186.309	177.736	190.911	172.142	185.971	191.906	286.211	261.209	259.056
C6orf89	154.084	150.346	135.646	108.634	101.373	111.91	116.658	120.072	116.736	94.385	83.9215	81.7068
C7	0	0.291368	0.692073	0	0	0	0	0	0.22109	0	0	0.190904
C7orf25	14.1072	11.6547	16.2637	12.8236	11.2636	15.5701	15.6493	13.3578	13.7076	12.0528	9.98424	11.836
C7orf26	14.7921	13.84	11.4192	14.106	12.6	10.5275	14.7008	9.35049	10.1701	14.2596	12.4128	14.3178
C7orf31	2.19142	3.6421	1.73018	0.732779	0.763637	0.796198	1.42266	1.03894	0.66327	0.848786	0.539688	1.33633
C7orf43	16.7095	16.0252	14.5335	16.4875	22.5273	18.578	30.8243	18.2557	22.7723	22.4079	21.3177	21.5721
C7orf50	29.1732	31.1764	29.4131	15.5716	12.6	16.1894	23.2368	18.2557	19.0138	24.2753	29.413	29.9719
C7orf57	0.547854	0.145684	0.346036	0.915974	2.1	1.0616	0.94844	1.03894	0.66327	7.97859	4.04766	6.49073
C7orf61	0.273927	0.437052	0.346036	0.549584	0.572728	0.619265	0.47422	0.445261	0.884361	0.848786	0.809533	0.381808
C8G	0.136963	0.291368	0.346036	0.183195	0.190909	0.0884665	0.47422	0	0.66327	0.169757	0.809533	0.381808
C8orf33	36.2953	41.0829	35.2957	36.8221	31.5	30.9633	38.886	33.8399	40.6806	49.2296	51.5402	51.544
C8orf34	2.87623	2.91368	4.15244	0.366389	0.381818	0.707732	0.94844	0.296841	0.22109	0	0.269844	0.190904
C8orf37	5.34158	7.2842	6.57469	1.64875	2.86364	3.09633	2.84532	2.81999	3.09526	3.73466	3.77782	2.48175
C8orf44	3.69801	2.91368	3.11433	1.64875	0.954546	1.94626	0.94844	1.33578	1.10545	1.52781	1.88891	0.381808
C8orf48	2.87623	2.62231	4.84451	1.83195	2.29091	2.30013	1.42266	1.92947	2.43199	2.3766	1.34922	2.29085
C8orf58	10.2723	12.9659	10.7271	6.04543	6.87273	7.25425	5.69064	6.38208	7.07488	5.26247	5.66673	4.58169
C8orf59	33.693	36.421	37.0259	30.7767	31.6909	29.9017	28.4532	27.0125	22.7723	29.8773	33.7305	30.3537
C8orf76	8.49174	11.2177	13.8415	11.3581	11.4546	11.3237	10.9071	9.94417	11.9389	11.883	12.4128	11.0724
C8orf82	9.72441	12.2375	11.0732	14.2892	14.3182	10.8814	12.3297	13.2094	15.4763	11.3737	13.4922	14.8905
C8orf88	4.51979	5.24462	5.53658	4.21348	2.86364	4.24639	0.94844	2.52315	2.87417	4.07417	3.50797	2.86356
C9	0.136963	0	0	0	0.190909	0.0884665	0	0.14842	0.22109	0.169757	0.269844	0
C9orf116	1.78053	0.874104	1.73018	0.366389	0.381818	0.619265	0	0.593682	0.884361	0.509271	2.15875	0.763615
C9orf147	0.821781	0.145684	0	0	0	0	0	0.14842	0.22109	0.339514	0	0.190904
C9orf152	0.136963	0.145684	0.346036	0.549584	0	0.0884665	0	0	0	0.339514	0.269844	0
C9orf153	0.41089	0	0	0.366389	0	0.0884665	0	0	0.44218	0	0	0
C9orf16	13.1485	14.8598	14.1875	20.701	18.3273	20.1704	46.4735	38.4409	41.5649	30.3865	36.429	38.9444
C9orf163	0.273927	0	0.346036	0.183195	0.381818	0.176933	0	0.296841	0.44218	0.169757	0.269844	0
C9orf170	0	0	0.346036	0	0.190909	0.176933	0	0	0.22109	0.169757	0	0.572711
C9orf3	18.3531	18.6476	16.9558	4.57987	7.82728	6.54652	6.63908	6.23366	5.96943	7.29956	5.93657	7.06344
C9orf40	19.1749	21.9983	21.8003	12.8236	9.92728	12.7392	8.53596	11.1315	10.6123	11.883	11.0636	9.73609
C9orf41-AS1	0.547854	0.145684	0	0.549584	0.190909	0.796198	0	0.14842	0.22109	0.169757	0.269844	0.381808
C9orf43	0	0.291368	0.692073	0.549584	0.190909	0.176933	0	0.296841	0.22109	0.509271	0.809533	0
C9orf47	3.83498	3.93347	1.38415	0.915974	1.14546	0.619265	0.47422	1.03894	0.22109	0.848786	0	1.14542
C9orf50	0	0.145684	0	0	0.190909	0.265399	0.47422	0.14842	0	0.339514	0	0
C9orf64	10.4092	12.3831	9.34298	7.87737	10.8818	11.4122	8.53596	8.16313	10.3912	10.5249	7.01595	7.63615
C9orf72	3.69801	5.24462	3.8064	30.0439	29.5909	27.3361	43.154	39.9251	38.4697	40.572	35.8893	35.699
C9orf78	51.3613	54.7772	47.0609	67.782	61.4728	66.0844	64.0197	69.9061	67.4325	85.8971	89.5883	104.233
C9orf84	0.821781	0.874104	0.346036	0.915974	0.381818	0.796198	0.47422	0.593682	0	0.169757	0.269844	0.190904
C9orf85	22.599	17.9191	13.1494	24.1817	20.4273	22.0281	19.443	20.482	23.6566	27.8402	33.1908	34.1718
CA11	1.23267	1.60252	1.03811	0.183195	0.572728	0.973131	2.3711	1.03894	1.10545	3.73466	1.61907	2.67265
CA12	21.2293	19.6673	19.032	43.7835	37.4182	47.0642	28.4532	23.7473	27.6363	20.8801	18.0796	18.8995
CA13	0.136963	0.291368	0.346036	0.549584	0.190909	0.176933	0.94844	0.890523	1.10545	0	0.539688	0.381808
CA14	0.136963	0.582736	1.03811	0.549584	0	0	0.94844	0	0.22109	0	0	0
CA5B	5.47854	4.80757	6.22865	3.66389	3.43637	4.86566	3.31954	5.49156	4.20071	5.43223	6.20642	4.9635
CA5BP1	1.64356	1.45684	3.11433	2.74792	3.05455	3.00786	2.3711	2.22631	3.09526	2.20684	3.23813	3.05446
CA7	0	0.437052	0	0.183195	0.190909	0.176933	0.47422	0.14842	0.22109	0.339514	0	0.190904
CA9	0	0	0.346036	0	0	0	0.47422	0	0.22109	0	0	0
CAAP1	43.0065	42.1027	41.8704	44.5163	37.9909	34.9443	41.2571	47.1977	40.9017	54.1525	59.6356	54.9803
CAB39	214.074	213.136	216.619	251.526	261.546	236.559	271.728	268.344	252.927	563.084	587.991	542.549
CAB39L	37.1171	35.9839	32.1814	80.6057	83.4273	89.1742	38.886	37.5504	45.1024	84.1995	70.1595	76.1706
CABCOCO1	0.547854	0.874104	0.346036	0	0	0	0	0	0	0	0	0
CABIN1	46.8415	48.6585	42.2164	39.5701	40.0909	40.4292	44.5767	32.3557	32.9424	39.8929	38.048	38.1808
CABLES1	11.094	11.509	12.8033	6.04543	4.2	5.66185	2.84532	1.4842	4.4218	0.848786	1.34922	1.71813
CABLES2	8.49174	11.9461	11.7652	5.86223	9.16364	7.07732	6.16486	8.16313	7.73815	4.7532	5.39688	4.58169
CABP1	0.136963	0	0	0	0	0	0	0.296841	0	0.169757	0.539688	0.381808
CABP7	0.273927	0.291368	0	0.183195	0	0.0884665	0.47422	0.14842	0.44218	0.339514	0	0.190904
CABYR	6.43728	6.4101	4.84451	1.83195	1.90909	2.65399	1.42266	1.63263	2.65308	1.86733	0.539688	1.71813
CACFD1	4.24587	5.09894	2.76829	4.94626	3.24546	3.18479	4.7422	5.49156	6.41161	6.11126	8.09533	6.87254
CACHD1	9.58744	11.509	11.4192	22.5329	23.8636	23.3551	15.175	17.9589	16.8029	24.6148	23.2066	29.2083
CACNA1A	34.2409	36.5667	26.6448	84.2696	84	79.6198	86.308	83.2639	86.8884	104.231	97.6836	108.242
CACNA1C	27.5297	25.6404	25.6067	4.94626	5.91818	5.04259	10.4328	9.64733	10.1701	8.48786	8.09533	7.63615
CACNA1C-AS1	0.273927	0	0	0.366389	0	0	0	0.14842	0.22109	0.169757	0	0.190904
CACNA1G	0.136963	0.437052	0.346036	0	0	0.265399	0.47422	0.445261	0.44218	0.509271	1.61907	0.381808
CACNA1H	0	0	0	0	0.572728	0.0884665	0	0.14842	0	0.339514	0.269844	0.572711
CACNA2D1	132.17	141.896	156.754	293.295	296.864	299.459	503.147	551.085	534.817	201.332	199.685	182.695
CACNA2D2	0.958744	0.145684	0.692073	0.183195	0	0.619265	0.47422	0.296841	0.66327	0.848786	0.809533	0.763615
CACNA2D3	0.41089	0.291368	0.346036	0.915974	0	0.353866	0	0.14842	0.44218	0.339514	0.269844	0.190904
CACNA2D4	0.136963	0	0	0.183195	0	0.176933	0	0	0	0.169757	0.269844	0.190904
CACNB1	5.47854	5.53599	1.73018	5.12945	3.81818	4.33486	7.58752	5.0463	4.20071	8.3181	7.82548	8.97248
CACNB2	0.821781	0.72842	0.692073	0.366389	0.190909	0.530799	0	0.14842	0	0.339514	0.539688	0.190904
CACNB3	26.297	28.117	20.7622	18.1363	17.9455	16.3663	17.0719	15.881	17.0239	12.7318	14.3017	11.836
CACNB4	0.547854	0.874104	1.38415	0	0.381818	0.530799	0.94844	1.33578	0.22109	0.679029	0.269844	0.954519
CACNG7	1.64356	1.01979	1.03811	4.21348	3.81818	3.36173	3.79376	3.11683	3.53744	7.80883	8.63501	6.10892
CACNG8	0.821781	1.31116	0.346036	2.01514	1.33636	1.5924	2.84532	2.07789	1.76872	7.1298	5.39688	7.06344
CACTIN	7.94388	7.13852	11.7652	8.24376	6.10909	6.36959	8.06174	6.67892	7.73815	6.45077	9.44455	5.72711
CACTIN-AS1	0.136963	0.437052	0.346036	0.366389	0.572728	0.176933	0	0.445261	0.66327	0.679029	0	0.190904
CACUL1	80.5345	85.9536	85.817	111.199	115.309	115.183	121.4	123.337	111.872	153.8	148.684	143.178
CACYBP	68.0708	68.1801	63.3246	72.9115	72.7364	79.7967	55.9579	64.8598	67.4325	88.104	96.8741	89.1521
CAD	63.2771	67.4517	60.9024	52.2105	51.7364	51.4875	39.8345	39.9251	42.2282	38.5349	39.1274	36.2717
CADM1	4.1089	3.35073	2.42225	0.549584	0.190909	0.353866	1.42266	2.22631	1.76872	1.86733	1.34922	1.52723
CADM4	0.821781	1.31116	1.73018	0.732779	0.381818	0.530799	0.47422	0.890523	2.43199	2.20684	2.4286	3.05446
CADPS	0	0.291368	1.03811	0.366389	0.763637	0.0884665	0	0	1.54763	0.679029	0.539688	1.52723
CADPS2	2.32838	3.05936	2.07622	2.56473	2.86364	2.30013	2.84532	3.56209	3.75853	1.69757	1.88891	1.71813
CAHM	0.684817	0	0.346036	0.549584	0.763637	0.176933	1.42266	0.296841	0.66327	0.339514	0.269844	0.381808
CALB1	0.41089	0.145684	0	0	0	0.265399	0	0.14842	0	0.169757	0	0.190904
CALB2	0.136963	0	0	0	0	0	0	0.296841	0	0.509271	0.269844	0.763615
CALCOCO1	48.896	49.3869	46.3689	50.9281	53.2637	53.1683	64.0197	60.5556	57.4834	112.379	96.8741	120.651
CALCOCO2	96.8332	104.018	88.5853	110.466	92.0182	102.71	120.926	111.019	101.48	141.408	140.589	146.805
CALCRL	2.87623	2.768	4.49847	14.106	11.0727	12.3853	8.53596	7.12418	6.85379	12.562	18.3494	16.6086
CALD1	4349.69	4286.31	4395.01	1050.62	1047.9	1065.93	712.278	742.251	704.614	794.973	785.786	779.842
CALHM1	0.136963	0	0.346036	0	0.190909	0.176933	0.47422	0.14842	0	0	0	0
CALHM2	33.1452	35.5469	34.6036	20.8842	18.9	18.7549	30.3501	23.4504	25.6465	19.6918	19.4288	20.4267
CALHM4	0.136963	0	0.346036	0.366389	0.381818	0.176933	0	0	0.22109	0	0	0
CALHM5	21.3663	17.7734	18.3399	8.79335	12.7909	11.1468	14.2266	14.0999	12.381	8.82737	8.63501	9.54519
CALHM6	0.684817	0.72842	0.692073	0.549584	0.381818	0.176933	0.94844	0.593682	0.22109	0.509271	0.269844	0.190904
CALM1	483.207	482.651	477.53	541.524	546.382	555.304	570.961	613.422	605.345	547.637	571.8	566.603
CALM2	1229.79	1236.42	1291.06	1015.27	1016.97	1066.82	898.172	953.75	944.718	934.513	924.216	930.465
CALM3	261.6	261.503	247.762	148.571	138.6	146.235	166.925	154.951	161.838	120.867	133.033	133.633
CALML4	6.57425	4.22484	4.49847	2.93112	2.86364	3.62712	2.3711	2.67157	2.65308	4.58344	4.58735	2.67265
CALR	941.35	947.237	934.298	656.02	625.991	600.156	714.649	720.136	744.411	511.818	548.054	557.057
CALU	1880.65	1794.39	1775.17	1338.6	1313.26	1354.78	1633.69	1722.27	1675.2	857.613	818.437	883.885
CALY	0	0	0	0.183195	0	0.0884665	0	0.14842	0.22109	0	0.539688	0.190904
CAMK1	10.2723	8.74104	11.0732	11.5413	15.6546	12.4738	11.3813	14.3968	12.6021	7.97859	10.2541	9.16338
CAMK1D	3.83498	2.62231	3.11433	1.64875	0.954546	0.707732	2.84532	2.07789	5.30616	3.22539	1.34922	1.52723
CAMK1G	0.136963	0.437052	0	0.366389	0	0.619265	0	0.14842	0.44218	1.86733	1.07938	1.90904
CAMK2A	0.136963	0.291368	0	0.183195	0	0.265399	0.47422	0	0	0.509271	0	0.190904
CAMK2B	0.136963	0	0	0.183195	0	0.176933	0	0	0.22109	0.848786	0.539688	1.52723
CAMK2D	310.907	307.976	321.468	172.753	174.682	172.775	183.049	193.243	186.379	278.911	290.622	260.202
CAMK2G	39.4455	39.4804	34.9497	21.9834	23.6727	26.7169	30.3501	25.5283	26.3097	16.2967	13.4922	15.845
CAMK2N1	270.092	268.35	274.753	422.264	414.082	418.092	401.664	411.718	407.69	465.135	468.719	448.433
CAMK2N2	0.547854	0.437052	0	0.366389	0.763637	0.796198	0.94844	1.18736	2.43199	3.22539	3.23813	4.9635
CAMK4	19.3118	20.6871	21.1082	6.7782	7.63637	6.72345	2.84532	8.31155	6.19052	4.41369	2.96829	3.81808
CAMKK1	5.06765	5.82736	5.19054	10.9917	9.92728	10.3506	10.4328	11.8736	13.9287	19.1826	18.6193	19.4722
CAMKK2	51.0874	48.3671	50.1753	33.7078	33.7909	30.9633	30.3501	32.9493	32.9424	16.6362	22.6669	20.6176
CAMKMT	5.06765	3.6421	6.22865	3.4807	2.67273	2.74246	3.31954	2.67157	4.4218	4.41369	3.77782	5.53621
CAMLG	45.6088	49.0955	51.5594	50.0122	46.9637	53.2568	51.2157	48.2367	49.3031	58.736	62.6039	62.4255
CAMSAP1	40.4042	38.7519	34.9497	47.6306	46.3909	44.6756	49.7931	47.0493	45.9867	61.2823	51.2704	62.4255
CAMSAP2	182.435	165.206	166.443	262.335	253.336	247.264	270.305	265.376	238.556	313.202	309.781	294.183
CAMTA1	41.6369	46.1818	44.9847	56.0576	56.3182	58.2109	64.9681	54.4703	59.4732	56.8686	48.0323	54.2167
CAMTA1-DT	0.136963	0	0	0.366389	0.381818	0	0	0.296841	0.22109	0	0	0.381808
CAMTA2	55.1963	48.3671	44.9847	43.234	39.7091	39.7214	30.8243	38.8862	38.6908	33.9514	29.1432	30.3537
CAND1	295.293	299.526	300.706	256.839	245.127	257.26	239.007	275.468	239.883	252.089	223.971	233.666
CAND1.11	0	0	0	0.549584	0	0.0884665	0	0.14842	0	0.169757	0.269844	0.381808
CAND2	2.73927	2.62231	3.11433	0.549584	0.763637	0.442332	1.42266	0.296841	0.44218	0.339514	0.809533	0.763615
CANT1	84.7804	84.6424	81.6646	123.656	127.718	123.057	128.514	114.729	132.433	102.533	99.5725	106.906
CANX	1153.51	1106.03	1173.41	1104.3	1071.38	1070.97	1227.75	1255.79	1199.41	1119.04	1097.19	1064.86
CAP1	662.629	677.285	613.522	682.583	690.137	697.47	636.877	638.208	638.951	791.917	790.374	826.804
CAP2	122.719	114.216	116.614	32.7919	33.9818	35.1212	24.6594	22.8568	24.3199	23.2567	24.286	23.863
CAPG	22.0511	21.8526	20.7622	30.4103	26.9182	26.0091	27.0305	28.4967	36.9221	21.5592	16.4605	21.1903
CAPN1	142.031	161.272	140.837	144.174	144.136	136.15	141.317	134.024	145.256	86.0669	93.6359	91.4429
CAPN10	6.30032	8.74104	12.1113	9.52612	8.4	7.78505	11.3813	8.31155	8.84361	10.3552	11.0636	9.73609
CAPN10-DT	3.69801	1.89389	3.11433	1.28236	1.14546	1.23853	2.3711	1.4842	0.884361	1.01854	0.539688	1.52723
CAPN11	0	0	0	0.366389	0.763637	0.442332	2.3711	0.890523	1.10545	2.03709	1.07938	1.52723
CAPN12	0.547854	0.145684	0	0.732779	0.190909	0.442332	0	0.14842	0.44218	1.1883	0.539688	0.190904
CAPN14	0.136963	0.437052	0.692073	0.366389	0.190909	0.265399	0	0.296841	0.22109	0.169757	0	0.381808
CAPN15	22.8729	24.1835	26.6448	29.3112	31.1182	25.8322	29.4016	24.341	28.0784	40.0627	42.0957	38.7535
CAPN2	639.893	654.121	648.818	838.849	831.409	866.706	824.668	838.576	827.319	436.106	414.751	438.124
CAPN3	4.1089	4.5162	5.19054	4.03028	3.24546	3.45019	1.89688	1.33578	1.76872	2.03709	2.4286	2.48175
CAPN5	33.4191	27.5343	22.8384	44.6995	46.7727	50.8682	68.7619	56.2514	59.6943	31.7446	29.9527	31.4991
CAPN7	69.9883	61.9157	67.4771	61.9198	67.3909	70.8616	73.0298	75.546	70.0856	83.86	91.747	92.0156
CAPN9	0.41089	0.145684	0	0	0.190909	0	0	0	0.22109	0	0	0.190904
CAPNS1	283.377	286.415	272.677	226.429	248.373	228.951	226.203	201.407	223.522	190.128	199.415	206.94
CAPNS2	0.273927	0	0	0	0.190909	0.0884665	0	0.593682	0	0	0.539688	0.381808
CAPRIN1	530.323	527.085	526.321	503.053	514.691	523.545	424.427	459.213	438.864	453.591	450.64	433.352
CAPRIN2	58.3464	55.2142	52.9436	54.0424	53.0727	53.3453	62.1228	54.4703	57.0413	81.9927	83.112	75.9797
CAPS	1.64356	1.60252	0.692073	0.183195	0.381818	0.707732	1.89688	1.03894	0.884361	0.848786	1.88891	0.190904
CAPS2	3.28712	3.20505	6.57469	1.09917	1.33636	1.0616	1.42266	1.33578	1.10545	1.52781	1.61907	1.14542
CAPSL	0.136963	0	0.346036	0.183195	0.381818	0.0884665	0	0.14842	0	0	0	0
CAPZA1	513.887	495.763	507.981	500.671	506.1	516.644	504.096	526.151	506.296	456.647	442.545	456.451
CAPZA2	300.361	313.512	312.471	320.957	339.627	357.316	330.531	334.095	331.414	318.974	330.559	277.956
CAPZA3	0	0	0	0.183195	0.190909	0.176933	0	0.14842	0	0.169757	0.269844	0
CAPZB	328.575	335.51	289.286	328.468	300.109	322.726	308.243	269.532	293.829	284.173	300.606	333.891
CARD10	4.79372	5.97304	4.49847	1.09917	2.1	2.1232	2.3711	1.4842	1.54763	1.52781	1.07938	1.14542
CARD14	1.36963	0.72842	0.346036	0.915974	0.954546	1.15006	0.94844	0.742102	0.44218	0.509271	1.07938	1.33633
CARD16	5.6155	6.26441	3.46036	3.4807	3.43637	4.06946	3.79376	2.37473	1.54763	5.26247	4.8572	5.91802
CARD19	25.6122	27.3886	25.2607	38.2877	36.8455	39.1022	55.4837	53.1345	52.8405	57.5477	67.7309	71.0162
CARD6	18.0792	17.7734	16.2637	30.4103	24.0546	25.8322	24.1852	25.3799	29.1839	21.8987	16.1907	22.3357
CARD8	29.1732	29.5739	29.0671	22.8993	30.1636	25.036	30.3501	28.942	29.8472	34.2909	36.9687	29.781
CARD8-AS1	2.19142	1.31116	2.42225	3.84709	3.81818	2.74246	1.89688	1.63263	4.64289	3.5649	2.4286	3.81808
CARD9	2.19142	2.62231	1.38415	0.915974	1.52727	1.41546	1.42266	2.22631	1.76872	1.86733	2.15875	2.29085
CARF	8.90263	11.6547	13.4954	8.24376	7.82728	6.54652	6.63908	8.31155	8.18034	6.45077	8.90486	4.39079
CARHSP1	22.0511	24.1835	24.2225	17.9531	18.1364	17.1625	19.443	17.2168	21.0036	26.9914	24.8257	29.781
CARM1	76.8365	71.5308	85.471	77.3082	70.8273	70.3308	62.1228	57.4387	63.4529	50.2481	49.6513	53.0713
CARMIL1	19.9967	24.7663	21.8003	19.6018	20.8091	20.0819	15.6493	19.4431	18.5716	17.3152	17.8097	17.1813
CARMIL2	0.684817	0.291368	0.346036	0	0.572728	0.353866	0.94844	0.14842	0.22109	0.679029	0.809533	0.763615
CARMN	2.32838	3.35073	1.38415	0	0	0.353866	0	0	0	0.169757	0	0
CARNMT1	42.0478	40.2088	39.1021	82.6208	83.8091	87.5818	76.8236	89.3491	83.7932	83.5205	70.4293	68.5345
CARNS1	0	0.145684	0	0.915974	1.52727	1.50393	2.84532	1.92947	2.2109	1.69757	1.34922	1.90904
CARS	4.1089	3.6421	3.46036	2.38153	3.05455	2.21166	2.84532	3.11683	2.43199	3.73466	5.12704	4.39079
CARS2	42.7326	43.8509	47.753	86.6511	75.7909	84.2201	88.2049	86.9744	88.6571	60.094	67.1912	66.8163
CASC1	0.821781	0.291368	0.346036	0	0	0	0	0	0	0	0	0
CASC10	2.87623	3.35073	3.11433	1.09917	1.33636	0.884665	1.42266	1.18736	1.54763	0.169757	0.539688	0.572711
CASC11	0.41089	0	0.346036	0	0	0	0	0	0.22109	0	0.269844	0.190904
CASC15	0	0	0	0	0	0	0.47422	0.445261	0	0	0.539688	0
CASC2	1.78053	1.60252	1.38415	0.732779	0.381818	0.265399	0	0.296841	0	0.339514	0.809533	0.572711
CASC3	53.5527	55.3599	50.1753	54.9584	58.2273	56.5301	58.8032	48.3851	55.4936	78.5976	65.842	74.2616
CASC4	309.674	304.917	343.614	250.244	233.482	259.207	275.522	290.459	282.553	248.524	252.034	233.284
CASC8	0.684817	0.145684	0.346036	0	0.190909	0	0	0	0	0	0	0
CASD1	49.4438	43.4138	38.064	38.4709	39.5182	45.9141	27.0305	27.9031	29.405	36.328	38.8576	33.9809
CASK	41.363	42.8311	35.2957	31.1431	23.4818	31.4056	38.4118	45.7135	50.8507	32.4236	31.5718	38.9444
CASKIN2	10.4092	9.46946	10.3811	5.86223	6.3	6.10419	7.1133	6.08524	4.64289	4.58344	8.63501	4.58169
CASP1	16.7095	16.608	19.032	7.69418	7.25455	10.616	4.7422	6.5305	6.6327	18.5035	17.8097	17.1813
CASP10	2.05445	2.62231	2.76829	3.11431	3.62727	2.65399	2.3711	2.67157	2.2109	1.69757	1.07938	1.90904
CASP12	0.136963	0.145684	0	0.183195	0.381818	0.176933	0	0	0.22109	0.169757	0	0
CASP2	34.3778	34.6728	35.6417	29.8607	30.7364	26.5399	36.0407	28.0515	28.7417	33.4422	30.4924	33.4082
CASP3	185.038	177.88	213.85	128.786	146.427	142.254	136.575	120.814	120.052	94.385	92.2867	90.6793
CASP4	58.2095	59.2934	56.4039	74.9266	75.7909	73.8695	66.3908	82.5218	80.0346	75.3722	66.6515	82.2795
CASP6	13.4224	14.4227	15.9177	9.52612	6.87273	7.87351	13.2782	9.79575	10.1701	7.63907	5.93657	8.97248
CASP7	39.0346	39.4804	40.1402	40.8524	45.0546	45.1179	48.3704	48.3851	44.8813	28.689	27.5241	30.3537
CASP8	24.6534	23.8922	17.6479	34.2574	25.0091	31.3171	30.3501	32.0588	28.0784	24.1055	28.0638	31.1173
CASP8AP2	52.32	49.6782	61.2484	45.2491	33.2182	42.287	35.5665	34.8788	38.0275	37.3466	38.048	35.699
CASP9	9.58744	8.88672	11.7652	6.22862	8.59091	8.75818	15.175	14.0999	13.4865	19.3523	21.8574	22.1448
CASS4	2.87623	1.31116	1.38415	0.183195	0.190909	0.530799	0.47422	0.890523	0.44218	1.01854	0.539688	0.190904
CAST	391.305	399.466	366.452	395.517	407.4	411.281	461.89	478.508	462.521	504.348	529.164	533.003
CASTOR1	3.69801	4.22484	4.84451	3.66389	3.62727	2.1232	4.7422	4.89788	5.74834	2.71611	2.15875	1.90904
CASTOR2	12.3267	12.2375	11.0732	19.4186	18.1364	15.3932	28.4532	22.5599	21.4457	21.7289	21.8574	18.8995
CASTOR3	5.20461	8.59536	8.30487	6.7782	5.15455	5.13105	5.69064	8.75681	7.51706	7.63907	9.44455	11.4542
CASZ1	0.273927	0	0.346036	0.183195	0	0	0	0	0.22109	0	0	0.190904
CAT	96.2853	111.157	103.119	71.8123	75.0273	75.9927	90.1018	84.1544	90.2048	46.6832	52.3498	47.9169
CATSPER1	1.64356	1.31116	2.42225	0.549584	0.190909	0.796198	0.94844	1.03894	0.66327	1.01854	0.809533	0.763615
CATSPER2P1	0.273927	0.291368	0.346036	0.183195	0.572728	0.0884665	0	0.14842	0	0.509271	0.809533	0
CATSPER3	0.273927	0.582736	0	0	0.763637	0.176933	0.94844	0	0.44218	0.339514	0.539688	0.572711
CATSPERE	1.78053	2.03958	1.73018	5.31265	5.53637	5.13105	8.06174	6.67892	8.18034	4.24393	3.50797	3.43627
CATSPERG	0.41089	0	0	0	0.381818	0	0.47422	0.14842	0	0.169757	0	0
CAV1	3419.43	3418.33	3575.25	966.902	970.391	918.636	633.083	639.099	641.825	300.81	283.606	299.719
CAV2	426.093	427.291	482.721	199.865	198.355	202.677	205.811	213.874	209.372	97.4406	105.779	93.1611
CAVIN1	1012.98	1051.55	1020.46	498.839	474.791	479.488	455.725	428.638	465.395	416.584	443.894	457.596
CAVIN2	6.02639	4.22484	5.88262	0.732779	0.572728	0.796198	0	0	0	0.339514	0	0
CAVIN3	56.155	55.5056	61.9405	42.5012	50.4	48.922	79.6689	78.8113	77.1605	25.6333	35.3496	38.5626
CAVIN4	2.87623	4.22484	1.38415	3.84709	3.81818	2.91939	0.94844	2.81999	2.65308	4.7532	4.58735	5.34531
CBARP	2.05445	2.91368	2.76829	2.56473	4.58182	2.74246	3.31954	4.74946	5.08507	10.6947	9.71439	8.97248
CBFA2T2	21.2293	17.1907	18.3399	20.1514	17.9455	20.7896	23.711	20.9273	22.9934	30.5563	25.6352	34.3627
CBFB	122.993	120.189	118.344	172.203	186.136	188.08	191.585	207.343	184.831	237.32	239.082	212.858
CBL	108.201	108.972	105.541	202.247	201.027	191.441	216.718	196.806	200.529	326.613	315.448	317.664
CBLB	37.2541	37.5865	40.8323	48.5466	49.6364	43.614	53.1126	56.3998	57.0413	100.496	92.8264	97.5518
CBLL1	51.2243	46.7646	41.5244	45.9819	45.8182	49.6297	45.0509	43.1904	34.0479	46.3437	36.9687	42.7625
CBLN3	6.16336	5.82736	3.8064	4.21348	4.39091	4.06946	6.63908	4.89788	4.86398	4.7532	5.12704	4.9635
CBLN4	0	0	0	0.732779	0.572728	0.530799	0	0.14842	0.22109	0	0.269844	0.190904
CBR1	61.7705	71.3852	69.5533	72.1787	67.0091	78.2928	81.5658	97.8091	89.5415	82.1625	82.8422	85.1431
CBR3	7.1221	7.42988	7.26676	4.76306	5.72728	5.83879	7.58752	7.2726	9.28579	4.41369	4.31751	5.91802
CBR3-AS1	2.05445	1.74821	1.03811	0.732779	0.954546	0.707732	2.3711	1.92947	0.66327	1.69757	3.50797	3.62717
CBR4	23.4208	24.3292	25.2607	25.2809	27.6818	26.7169	19.443	24.341	25.8675	21.3894	21.3177	25.9629
CBWD1	4.1089	4.95326	4.49847	3.2975	3.62727	3.71559	2.3711	4.45261	4.20071	4.7532	4.58735	4.19988
CBWD2	7.53299	9.32378	6.22865	8.42696	9.16364	7.34272	7.58752	9.05365	6.6327	10.8645	11.6033	10.3088
CBWD5	3.42409	3.49642	3.11433	1.64875	2.86364	1.94626	1.42266	2.37473	1.76872	3.5649	2.69844	2.48175
CBWD6	0.958744	0.145684	0.692073	0.183195	0	0.442332	0.47422	0.445261	0.884361	0.848786	0.269844	0
CBX1	100.531	104.892	109.001	63.019	65.4818	72.8964	49.3189	53.4314	54.8304	58.2267	59.9054	53.2622
CBX2	1.36963	1.31116	0.692073	0	0.572728	0.442332	0.94844	0.890523	1.54763	1.01854	0.539688	1.14542
CBX3	262.011	284.084	318.353	300.623	305.836	321.133	281.212	297.286	285.427	243.602	264.717	246.648
CBX3P2	0.41089	0	0.346036	0.183195	0.190909	0.265399	0	0	0	0	0	0
CBX4	17.3944	14.4227	14.5335	21.617	21.3818	17.6048	17.5461	18.8494	24.7621	29.0285	25.3654	29.5901
CBX5	268.722	239.067	255.721	186.859	162.273	173.394	163.132	169.199	159.406	239.358	219.383	229.466
CBX6	125.185	129.513	133.57	112.482	100.8	102.356	123.771	120.369	121.821	204.048	215.066	222.212
CBX7	6.84817	8.44967	9.68902	4.57987	7.25455	6.10419	6.63908	5.93682	7.29597	7.97859	9.1747	6.87254
CBX8	3.83498	2.91368	2.76829	3.4807	3.62727	3.62712	5.21642	3.85893	3.97962	6.96004	7.28579	9.35429
CBY1	16.2987	20.9785	17.3018	8.61015	9.35455	9.37744	8.53596	8.16313	8.62252	9.84591	12.143	9.73609
CC2D1A	14.5181	13.6943	15.5716	6.41181	8.4	11.0583	12.8039	10.0926	13.7076	11.0342	11.6033	12.0269
CC2D1B	33.4191	29.8652	25.2607	26.9296	27.4909	26.8938	33.1954	24.4894	36.0377	31.2353	31.5718	31.8809
CC2D2A	24.5165	20.1044	15.9177	7.32779	3.81818	6.90038	4.26798	5.19472	4.20071	5.77174	6.74611	9.35429
CC2D2B	0.273927	0.145684	0	0	0.190909	0.176933	0.94844	0.445261	0.22109	0	0.269844	0.190904
CCAR1	172.711	174.966	167.482	161.578	144.9	156.674	136.101	153.615	149.678	167.041	180.796	171.05
CCAR2	48.896	47.6387	46.3689	49.0962	44.6727	43.7024	44.5767	43.6356	49.5242	70.4492	67.7309	68.9163
CCBE1	29.3102	25.9318	33.2195	8.79335	7.44546	6.72345	5.69064	2.67157	1.76872	7.97859	10.2541	9.35429
CCDC102A	5.06765	3.05936	5.53658	3.4807	3.24546	2.38859	4.7422	2.67157	2.65308	4.7532	2.96829	3.43627
CCDC102B	2.46534	2.18526	3.8064	2.56473	2.1	2.03473	1.42266	2.22631	1.76872	0.169757	0.539688	0.190904
CCDC103	0.821781	0.72842	1.03811	0.549584	1.33636	0.884665	1.42266	1.03894	0.44218	1.01854	0.539688	0.190904
CCDC106	3.56105	5.82736	4.15244	2.38153	2.29091	1.8578	3.31954	2.37473	3.97962	2.20684	2.69844	1.71813
CCDC107	1.36963	1.74821	1.38415	1.09917	2.1	0.884665	1.89688	1.92947	1.76872	1.35806	2.69844	0.954519
CCDC110	0.136963	0	0.692073	0	0.190909	0.0884665	0	0.296841	0	0	0	0
CCDC112	17.6683	21.5612	17.6479	8.79335	11.0727	10.2621	9.4844	12.0221	10.1701	8.48786	11.3335	10.1179
CCDC113	2.32838	2.18526	2.42225	0.549584	0.381818	0.707732	0.94844	0.296841	0.44218	0.848786	0.539688	0.381808
CCDC114	0.273927	0.145684	0	0	0.190909	0	0	0.296841	0.22109	0	0	0.190904
CCDC115	20.9554	16.608	19.378	12.274	13.5546	10.7929	11.8555	15.1389	14.5919	8.82737	9.71439	6.87254
CCDC116	0.136963	0.145684	0	0	0.190909	0.442332	0.47422	0	0	0.509271	0	0
CCDC117	48.4851	43.4138	51.2134	51.6609	50.2091	56.707	36.5149	49.1272	51.0718	48.5505	48.0323	49.2532
CCDC12	10.4092	11.2177	12.4573	10.8085	10.1182	11.8545	16.1235	12.6157	13.9287	18.843	15.651	20.4267
CCDC120	0.958744	1.16547	2.07622	0.915974	0.954546	0.353866	0.94844	0.296841	0.22109	1.01854	0.539688	1.14542
CCDC121	1.09571	0.437052	1.03811	1.09917	1.33636	1.0616	2.84532	1.78105	1.54763	1.1883	2.69844	3.62717
CCDC122	18.0792	18.6476	23.1844	10.8085	11.6455	10.8814	13.7524	14.9905	10.8334	6.79029	5.12704	8.59067
CCDC124	12.0528	10.0522	16.9558	6.22862	6.3	7.43118	9.95861	6.67892	9.28579	7.46931	9.44455	10.3088
CCDC125	0.136963	0	0.346036	0.183195	0.190909	0.0884665	0.94844	0.14842	0	0.339514	0	0.190904
CCDC126	12.3267	8.01262	12.1113	12.6404	11.6455	11.8545	11.3813	13.061	11.7178	16.6362	17.27	13.3633
CCDC127	15.3399	12.3831	15.2256	12.6404	10.5	12.0314	14.7008	14.842	11.7178	13.2411	15.3811	18.3268
CCDC13	0	0.145684	0	0.183195	0	0.0884665	0	0.14842	0	0.848786	0	0.763615
CCDC130	10.9571	11.3634	9.34298	10.0757	10.5	11.2352	10.9071	8.75681	12.16	10.3552	14.3017	10.8815
CCDC134	1.23267	2.03958	1.73018	0.915974	0.763637	1.8578	1.42266	1.78105	2.43199	2.54636	1.34922	1.33633
CCDC136	10.8201	13.84	10.0351	10.6253	10.5	12.2968	14.2266	10.3894	13.2654	16.4664	17.8097	16.7995
CCDC137	22.7359	21.1242	18.3399	19.2354	16.8	18.2241	9.4844	13.5063	17.0239	12.0528	13.2224	13.5542
CCDC138	3.28712	2.91368	2.42225	2.74792	1.71818	2.1232	1.42266	1.33578	2.2109	2.03709	1.61907	1.71813
CCDC14	269.407	256.987	245.34	48.7298	50.7818	56.6185	42.6798	54.0251	53.7249	68.2424	59.0959	59.7529
CCDC140	0	0	0.346036	0	0	0	0.47422	0.14842	0	0.679029	0.269844	0.572711
CCDC142	8.90263	8.30399	5.19054	8.61015	12.0273	10.7929	12.8039	17.2168	15.0341	15.2781	16.4605	20.0449
CCDC144B	8.90263	10.1979	11.4192	7.14459	6.10909	5.13105	4.26798	3.85893	5.96943	6.45077	5.39688	5.1544
CCDC144CP	0.273927	0.437052	0	0.183195	0.190909	0.0884665	0	0.296841	0.22109	0.169757	0.539688	0
CCDC144NL-AS1	0.136963	0.582736	0.346036	0.183195	0.190909	0.265399	0.47422	0.445261	0.44218	0.679029	0	0.381808
CCDC146	4.1089	3.49642	2.76829	2.19834	1.14546	1.15006	1.42266	1.4842	3.75853	1.69757	1.34922	0.954519
CCDC148	0.136963	0.437052	2.07622	0	0	0	0	0	0.22109	0.169757	0.269844	0
CCDC149	13.1485	12.3831	13.1494	14.8388	13.1727	13.3584	20.3914	21.6694	21.0036	15.2781	15.651	17.945
CCDC15	5.6155	5.68168	10.3811	3.4807	4.77273	5.13105	5.21642	3.56209	5.74834	10.5249	9.1747	12.0269
CCDC150	3.0132	3.49642	2.76829	0.915974	0.954546	1.23853	0.47422	0.445261	0.22109	0	1.07938	0
CCDC151	0.41089	0.291368	0	0.732779	0.190909	0.619265	1.42266	0.445261	0.66327	0.679029	1.34922	1.14542
CCDC152	3.28712	2.18526	5.88262	1.28236	0.954546	0.619265	0.94844	0.593682	0.44218	1.52781	0.269844	0.763615
CCDC153	0.136963	0.582736	0	0	0	0	0	0.296841	0	0.169757	0.269844	0
CCDC154	0.273927	0.145684	0	0	0	0	0	0	0.22109	0.509271	0.269844	0.381808
CCDC157	1.36963	1.60252	3.11433	0.549584	1.33636	1.41546	1.42266	2.07789	2.87417	3.22539	2.15875	2.48175
CCDC158	1.09571	0.874104	0	0.183195	0.190909	0.0884665	0	0.890523	0.22109	0	0.269844	0
CCDC159	3.15016	2.03958	1.38415	2.19834	0.954546	0.973131	2.84532	1.78105	2.2109	2.88587	2.4286	2.09994
CCDC162P	0.547854	0	0.346036	0.183195	0.190909	0.176933	0.47422	0.14842	0.44218	0.509271	0	0.190904
CCDC163	0.136963	0.582736	1.03811	0.366389	0.572728	0.796198	0.47422	0.890523	0.66327	1.01854	0.269844	0.763615
CCDC167	6.02639	7.42988	6.92073	6.22862	4.58182	6.19265	7.58752	6.67892	8.40143	5.9415	5.12704	7.44525
CCDC168	0.41089	0.72842	0.692073	0.732779	1.33636	1.327	0.94844	0.742102	1.76872	0.848786	0.269844	0.763615
CCDC169	0.136963	0.437052	0	0	0	0	0	0.14842	0	0	0.539688	0.381808
CCDC17	0.273927	0.291368	0.692073	0.732779	0.763637	0.265399	0	0.296841	0.22109	0.679029	0.539688	0.190904
CCDC170	1.36963	1.60252	0.692073	0	0.190909	0.176933	0	0.296841	0.44218	0.339514	0	0.190904
CCDC171	2.60231	3.05936	3.46036	1.46556	2.1	2.03473	2.3711	3.71051	3.31635	2.88587	2.96829	4.58169
CCDC173	0.821781	0.874104	0.692073	0.366389	0.190909	0.0884665	0	0.14842	0	0	0	0
CCDC174	16.0247	17.3364	15.2256	12.0909	11.8364	12.2084	13.7524	13.2094	14.3709	15.9572	17.27	19.4722
CCDC18	20.8184	21.8526	23.1844	14.2892	14.5091	15.5701	15.175	14.5452	17.6872	11.5435	12.143	15.845
CCDC18-AS1	9.99833	12.8202	9.68902	9.52612	8.01819	10.616	10.9071	9.05365	7.29597	13.4108	14.5716	13.3633
CCDC181	0.821781	0.72842	1.03811	1.09917	0.572728	0.796198	0	0.445261	0	0.339514	1.34922	0.954519
CCDC183	0.684817	0.874104	1.03811	0.183195	0.763637	0	0.47422	0.445261	0.44218	0.679029	0.269844	0.381808
CCDC183-AS1	0.958744	0.72842	1.38415	0.366389	0.763637	0.619265	0.94844	1.18736	0.66327	0.848786	0.269844	0.381808
CCDC184	0.273927	0.145684	0.346036	1.09917	0	0.265399	1.42266	1.03894	0.884361	1.52781	0.269844	1.33633
CCDC186	89.985	86.682	85.471	49.6458	54.6	59.8033	55.4837	48.2367	55.2725	61.1126	66.6515	59.3711
CCDC188	2.46534	1.74821	2.07622	2.19834	2.29091	2.91939	3.31954	2.81999	1.98981	0.848786	2.15875	1.33633
CCDC190	1.5066	1.45684	0.692073	0	0	0	0	0	0	0.169757	0	0
CCDC191	6.16336	4.80757	8.65091	1.83195	1.52727	3.00786	1.42266	1.78105	1.76872	3.05563	3.50797	3.24536
CCDC200	1.78053	0.874104	0.346036	0.366389	0.190909	0.707732	0.47422	1.03894	0.22109	0.339514	0.269844	0.190904
CCDC22	4.38283	6.11873	4.84451	7.51098	5.34546	6.10419	5.69064	7.2726	7.51706	5.9415	6.74611	8.01796
CCDC24	3.97194	3.05936	1.73018	2.38153	2.67273	1.76933	2.84532	1.4842	1.76872	2.03709	2.15875	3.05446
CCDC25	56.7029	56.3797	57.096	41.7684	41.6182	42.4639	38.4118	40.0735	34.4901	48.5505	45.3338	53.0713
CCDC28A	8.6287	9.76083	11.7652	10.0757	11.8364	12.7392	4.7422	7.42102	9.0647	15.4479	16.1907	16.9904
CCDC28B	4.65676	4.80757	5.53658	1.83195	0.954546	1.41546	2.84532	1.63263	2.87417	1.35806	1.88891	2.86356
CCDC3	0.273927	0.291368	0.692073	0	0	0.0884665	0.47422	0.14842	0.44218	0	0	0.381808
CCDC30	0.547854	0.874104	1.03811	0.183195	0.572728	0.353866	1.42266	0.296841	0.44218	0.339514	1.61907	0.381808
CCDC32	12.1897	16.1709	12.4573	12.6404	13.1727	11.6776	9.95861	13.5063	11.9389	15.2781	15.651	15.2723
CCDC34	13.4224	12.9659	12.8033	8.24376	7.44546	6.72345	2.84532	6.08524	3.75853	7.1298	7.01595	5.91802
CCDC39	14.1072	12.9659	17.3018	10.0757	8.97273	11.5006	8.06174	11.5768	7.95925	12.9015	13.4922	10.8815
CCDC40	2.46534	3.35073	3.11433	1.64875	2.1	1.15006	3.79376	3.11683	4.20071	3.90441	4.04766	3.81808
CCDC43	45.3349	40.6458	41.1783	34.807	33.6	34.5904	30.3501	32.2072	32.0581	42.2695	38.8576	41.2352
CCDC47	189.42	185.31	192.742	147.472	170.1	165.078	157.441	167.418	164.491	195.051	195.907	177.541
CCDC50	270.092	267.184	262.296	146.922	146.427	151.278	149.379	145.007	147.909	207.783	202.383	202.549
CCDC51	7.53299	7.2842	8.30487	5.86223	5.72728	6.01572	8.06174	4.74946	5.08507	5.43223	9.71439	6.68163
CCDC57	14.7921	13.5486	12.8033	13.19	13.5546	16.0124	11.8555	11.1315	11.2756	11.7132	13.2224	11.4542
CCDC58	10.4092	9.46946	11.4192	9.34293	9.54546	8.05045	6.16486	8.01471	11.2756	10.5249	8.09533	10.4997
CCDC59	28.4884	26.6602	28.721	28.7616	25.7727	28.8401	20.8657	21.521	20.7825	31.9143	36.429	36.0808
CCDC6	129.02	122.229	130.456	98.3756	97.5546	95.5438	99.1119	101.223	97.5008	96.4221	97.9534	93.9247
CCDC61	3.28712	2.62231	1.38415	2.01514	2.1	1.5924	0.47422	1.4842	1.32654	1.1883	0.809533	1.52723
CCDC62	0.273927	1.01979	0.692073	1.28236	0.572728	2.65399	3.31954	1.33578	1.54763	1.69757	2.4286	2.29085
CCDC65	1.91749	1.16547	3.11433	2.01514	1.71818	1.327	1.42266	1.03894	1.32654	2.3766	1.61907	1.33633
CCDC66	15.8878	15.7339	13.1494	12.8236	8.97273	13.4469	9.95861	12.3189	9.50688	13.2411	17.0002	17.5632
CCDC68	27.3927	24.7663	20.7622	14.2892	15.6546	12.7392	40.7829	32.9493	30.7315	10.0157	14.8414	14.3178
CCDC69	1.36963	0.874104	1.03811	1.83195	1.33636	0.884665	1.42266	1.18736	2.2109	2.3766	1.34922	3.24536
CCDC7	11.6419	10.7806	11.7652	7.14459	9.73637	10.7044	10.4328	11.8736	10.1701	13.7503	16.4605	12.9815
CCDC71	8.76566	10.7806	12.1113	6.59501	7.82728	7.16578	5.21642	7.56945	7.07488	5.77174	6.74611	5.91802
CCDC71L	266.805	271.846	265.41	269.479	268.227	255.049	250.388	260.775	252.264	311.165	320.845	319.764
CCDC73	0.821781	1.16547	0.692073	0.366389	1.33636	1.23853	0.47422	0.742102	1.32654	0.339514	0.269844	1.90904
CCDC74A	1.64356	1.74821	1.03811	1.09917	1.33636	1.327	3.31954	2.52315	2.87417	4.24393	3.50797	4.19988
CCDC74B	1.23267	0.582736	0.346036	0.183195	0	0.265399	0	0.296841	0.884361	0.339514	0.539688	0.381808
CCDC77	5.75247	6.26441	5.19054	5.86223	4.00909	6.01572	6.63908	5.93682	7.51706	4.92296	7.55564	5.1544
CCDC78	0.958744	1.01979	0	1.46556	1.33636	0.973131	2.84532	1.33578	1.76872	2.3766	5.12704	2.67265
CCDC8	3.69801	2.768	2.07622	2.19834	2.1	2.56553	1.89688	2.37473	2.65308	4.58344	1.34922	6.49073
CCDC80	140.798	139.128	125.265	24.3649	24.8182	26.1861	28.4532	27.7546	34.0479	18.3338	18.3494	20.0449
CCDC81	9.72441	8.88672	8.65091	0.915974	0	0.707732	0	0.742102	0	1.1883	0.269844	0.190904
CCDC82	68.3448	72.9877	74.3978	87.0175	75.2182	80.5045	75.8752	83.2639	68.0958	90.8201	89.0486	91.8247
CCDC84	13.9703	10.0522	11.4192	9.70932	9.35455	10.9698	13.7524	10.5379	13.2654	19.8616	17.27	19.4722
CCDC85A	1.23267	0.437052	0.346036	0	0	0	0	0	0	0	0	0
CCDC85B	36.5692	45.7448	42.9085	26.0136	23.4818	22.4705	19.443	21.2241	22.109	21.0499	29.6829	21.3812
CCDC85C	21.7772	22.8724	21.1082	10.9917	8.59091	8.05045	7.58752	7.2726	7.29597	12.3923	12.6827	11.4542
CCDC86	16.1617	15.1511	14.1875	24.7313	21.3818	22.382	23.2368	17.8105	16.8029	22.0684	24.8257	23.2903
CCDC87	0.41089	0.145684	0.346036	0.732779	0	0.530799	0	0.593682	0.66327	0.169757	0.809533	0.572711
CCDC88A	258.861	265.291	284.096	367.672	348.982	351.566	280.738	289.865	292.502	172.643	174.589	163.414
CCDC88B	0.41089	0.291368	0	0	0.381818	0.176933	0	0	0	0.169757	0.269844	0.190904
CCDC89	4.38283	3.6421	3.46036	2.56473	1.52727	3.53866	2.84532	2.22631	3.75853	4.41369	5.39688	4.00898
CCDC9	6.43728	5.09894	5.19054	6.9614	8.59091	6.19265	6.16486	4.45261	7.29597	7.63907	11.3335	6.29983
CCDC90B	71.084	71.8222	74.7438	53.4929	48.8727	57.9455	48.8446	54.1735	54.3882	50.0784	53.1593	40.4716
CCDC91	32.3234	32.1962	34.6036	32.2423	30.7364	34.325	36.0407	33.543	30.0683	59.2452	58.0165	54.7894
CCDC92	2.87623	1.89389	3.11433	2.38153	4.00909	2.74246	1.42266	2.81999	3.09526	2.54636	2.4286	1.14542
CCDC93	62.7293	57.3995	54.6737	63.019	62.2364	64.8459	70.1845	63.9692	66.9903	73.5048	70.969	77.5069
CCDC96	2.46534	1.74821	2.42225	0.915974	0.954546	1.41546	0.94844	0.14842	1.54763	0.509271	1.07938	0.381808
CCDC97	9.17655	11.2177	8.30487	8.97654	6.10909	9.73131	11.8555	7.12418	10.1701	12.9015	6.47626	8.78158
CCDC9B	67.523	68.9085	68.1692	33.891	33.6	36.8905	47.422	35.3241	39.354	24.6148	28.8733	29.0174
CCIN	0.41089	0	0	0.366389	0.381818	0.353866	0.94844	1.33578	0.44218	0.848786	0	0.190904
CCK	0	0	0.346036	0.366389	0	0.0884665	0	0	0	0	0.269844	0.381808
CCL2	165.452	165.206	191.704	4.94626	5.53637	4.86566	3.79376	4.00735	3.97962	1.35806	1.07938	1.71813
CCL20	0	0	0.346036	11.7245	9.54546	10.616	6.63908	7.42102	6.6327	2.3766	2.96829	4.00898
CCL26	0.273927	0.437052	0.346036	0.549584	0.381818	0.265399	0.47422	0	0	0.169757	0	0
CCL28	0.684817	0.291368	1.38415	0.183195	0.572728	0.353866	0	0	0	0.169757	0	0.381808
CCL7	0.684817	0.874104	1.03811	1.28236	1.71818	1.41546	0.94844	2.22631	1.76872	1.52781	1.88891	0.954519
[truncated: 13,987 more rows]

## Sheet: Supplementary Table 3B
Gene	Con1	Con2	Con3	Sen1	Sen2	Sen3	Sen siMir31hg 1	Sen siMir31hg 2	Sen siMir31hg 3	Sen siYBX1 1	Sen siYBX1 2	Sen siYBX1 3
ANG	0.547854	0.145684	0.346036	1.28236	1.90909	0.707732	0.94844	1.33578	1.54763	1.01854	0.809533	0.381808
AREG	15.8878	18.0648	23.5305	114.13	131.346	121.111	97.6893	97.2154	105.239	152.612	191.32	179.45
CCL20	0	0	0.346036	11.7245	9.54546	10.616	6.63908	7.42102	6.6327	2.3766	2.96829	4.00898
CCL26	0.273927	0.437052	0.346036	0.549584	0.381818	0.265399	0.47422	0	0	0.169757	0	0
CTSB	1055.44	1087.39	1073.06	3367.49	3363.06	3280.96	5659.34	5640.72	5704.79	4664.25	4736.31	4746.63
CXCL1	12.7376	10.6349	14.5335	44.6995	43.3364	38.9252	9.4844	7.56945	11.2756	2.54636	4.31751	2.67265
CXCL12	173.259	174.529	181.669	6.7782	3.81818	4.06946	3.31954	5.0463	3.75853	1.86733	1.07938	1.52723
CXCL2	0.958744	0.437052	1.38415	32.975	30.7364	27.5131	8.53596	4.60104	5.52725	6.79029	8.36517	8.59067
CXCL5	2.05445	2.47663	2.42225	10.8085	16.8	13.6238	1.89688	2.07789	1.54763	16.9757	18.8891	17.945
CXCL8	39.7194	28.4084	38.7561	1911.64	1997.67	1960.95	1069.37	1022.91	995.569	425.411	454.418	418.843
EGF	3.56105	3.35073	2.76829	0.183195	0.381818	0.0884665	0	0.14842	0.884361	0	0	0
EGFR	262.97	248.1	266.448	280.288	287.891	283.8	196.801	200.368	203.403	277.044	291.162	298.574
EREG	1880.92	1745	1821.19	11344.5	11291.3	10903	8363.81	8524.68	8422.21	8133.74	8230.25	7806.06
FAS	138.333	134.903	146.719	44.1499	36.0818	42.1985	41.7313	54.0251	49.7453	22.2382	20.778	22.1448
FGF2	1249.93	1103.41	1145.03	1302.33	1270.31	1223.85	648.258	662.846	629.444	443.066	489.497	429.152
FGF7	19.9967	20.6871	20.0701	10.2589	11.6455	12.3853	9.95861	6.97576	7.73815	2.54636	4.58735	3.43627
HGF	117.652	123.103	152.602	1199.56	1316.7	1302.31	1086.91	1127.4	1108.1	163.137	159.478	164.75
ICAM1	53.6897	48.9498	46.0228	470.444	489.682	427.293	518.322	466.931	501.875	242.753	232.606	250.848
ICAM3	3.0132	4.37052	5.53658	6.22862	5.15455	6.10419	9.4844	9.20207	5.08507	5.26247	5.93657	5.53621
IGFBP2	0.547854	0.582736	0.346036	0	0.763637	0.265399	0.47422	0.445261	0.44218	0.169757	0.539688	0.954519
IGFBP3	107.653	104.455	95.8521	2.56473	5.72728	5.75032	7.1133	4.45261	6.41161	10.0157	12.4128	8.01796
IGFBP4	575.384	615.806	592.068	157.547	149.673	140.839	194.43	155.693	175.988	83.86	84.1914	97.7428
IGFBP6	63.551	70.9481	70.2454	77.3082	72.9273	68.1192	150.802	127.493	152.11	92.8572	102.271	100.034
IGFBP7	388.976	418.404	412.129	111.199	102.327	105.098	138.946	152.576	151.447	50.2481	53.4292	59.9438
IL15	7.1221	6.4101	6.92073	2.01514	2.86364	2.30013	3.79376	2.81999	3.31635	2.88587	2.69844	4.19988
IL1A	7.39603	7.13852	9.34298	75.4762	75.6	73.6926	59.2775	68.2734	64.1161	51.4364	51.5402	53.2622
IL1B	17.6683	17.1907	22.4924	3376.64	3413.84	3214.61	2627.18	2548.08	2655.96	1391.67	1351.65	1475.88
IL6	43.2805	38.4606	52.2515	50.0122	50.9727	50.4259	10.4328	10.241	7.07488	1.86733	1.88891	1.14542
IL7	1.78053	2.03958	1.38415	0.366389	0.381818	0.176933	0	0.593682	0	0.509271	0	0.572711
KITLG	392.4	392.618	411.783	51.6609	57.0818	60.688	54.0611	59.665	49.3031	50.4179	50.7307	49.635
MMP1	250.232	258.443	307.626	9359.97	9520.83	9460.25	8756.94	8570.24	8613.89	8368.52	8131.76	8322.45
MMP10	0.41089	0.72842	0.346036	72.1787	72.1637	62.8997	24.6594	22.7083	20.3403	94.5547	83.112	95.0701
MMP12	0.136963	0.145684	0	4.57987	4.39091	5.30799	0	1.33578	0.66327	0.169757	0.809533	0.381808
MMP13	0	0.437052	0	0.183195	0.190909	0.442332	0	0.296841	0	0.169757	0	0.190904
MMP14	295.704	315.114	295.861	1329.63	1293.22	1234.99	1433.57	1336.38	1391.1	1696.55	1732.13	1724.24
MMP3	62.3184	57.5452	63.3246	2292.86	2148.11	1982.71	282.635	281.257	288.302	529.303	507.847	502.268
NGF	4.65676	4.5162	5.19054	0.183195	0.190909	0	0.47422	0	0.44218	1.35806	1.88891	1.14542
NRG1	86.6979	82.6028	85.471	1103.2	1096.58	1045.85	855.492	802.51	826.214	463.777	485.72	495.204
PIGF	15.066	18.2105	17.6479	12.274	15.4636	15.747	8.06174	17.2168	16.5818	12.562	8.63501	9.927
PLAUR	72.3167	82.6028	73.3597	296.043	310.418	298.132	291.171	284.374	290.07	274.497	289.003	280.247
SERPINE1	1900.64	1898.41	1828.46	1815.46	1823.76	1867.35	2750.47	2602.7	2632.74	2163.39	2272.9	2212.96
SERPINE2	1476.6	1423.19	1359.58	166.524	155.973	165.963	150.802	162.52	158.743	133.769	132.763	145.469
TIMP1	325.973	355.469	327.004	2615.65	2538.71	2342.15	4809.06	4463.6	4752.11	4019.68	4189.06	4338.1
TIMP2	1271.98	1271.09	1256.8	1059.96	1036.45	1073.89	1155.67	1160.5	1155.2	1513.89	1487.38	1511.39
TNFRSF11B	3141.39	3090.83	3391.85	913.226	904.909	909.435	549.621	581.957	599.154	337.138	348.099	349.545
TNFRSF1A	65.4685	67.4517	71.9756	89.5822	77.7	80.8583	102.431	95.8796	94.8477	90.8201	99.3027	99.4609
